# Supplementary material for: Deciphering cellular context for efficient and cell type-specific CRISPR-Cas13d gRNA design using in vivo RNA structure and deep learning
Source: Research Square preprint supplement (doi:10.21203/rs.3.rs-7184055/v1), 2025-09-24
Supplement: Supplementary file 1 [file 0f24bbef0787a505575121a3.xlsx]

## Sheet: Hela-screen-count-table
gRNA	Gene	H0-R1	H0-R2	H0-R3	H2-R4	H7-R1	H7-R2	H7-R3	H7-R4	H14-R1	H14-R2	H14-R3	H14-R4
SNU13_Hela_gRNA659	SNU13	4342.27	5045.82	3837.46	4390.59	232.633	165.796	97.7541	158.311	263.964	326.641	53.3828	411.807
G6PC3_Hela_gRNA798	G6PC3	3570.92	5590.68	5051	5367.28	4201.67	6234.88	4825.92	6946.76	4658.59	7159.25	4678.47	9084.71
SNRPD2_Hela_gRNA534	SNRPD2	3126.87	4188.72	4541.09	3310.32	759.166	1754.96	1582.26	1334.8	477.398	589.167	239.155	426.206
TIMM23_Hela_gRNA777	TIMM23	6195.92	3832.76	5028.53	4804.21	9823.1	5310.18	7525.37	5536.73	10343.6	5239.26	10072.3	5782.57
COPB1_Hela_gRNA1085	COPB1	4904.15	4451	4961.11	4831.32	127.142	55.9776	108.757	266.313	453.264	202.743	108.901	311.975
NOP16_Hela_gRNA667	NOP16	5759.51	6902.1	8597.86	6925.82	6726.09	9583.7	9836.77	7524.62	7987.56	10438.7	13422.6	7832.01
ELOC_Hela_gRNA474	ELOC	6330.11	4678.94	4977.38	5472.95	7337.84	6240.43	5510.2	6392.44	7943.82	6837.8	5767.47	7729.29
CNPY3_Hela_gRNA771	CNPY3	3536	4052.89	3441.47	2964.14	3598.21	4935.86	3226.31	2877.29	5360.74	4964.6	4468.14	2926.8
YAE1_Hela_gRNA193	YAE1	5278.37	5571.95	5609.72	5478.51	4842.45	4904.23	6580.84	6389.21	6833.66	5124.89	8275.4	7047.75
DDX23_Hela_gRNA1564	DDX23	4937.97	4391.68	3553.06	4982.17	6506.35	4216.69	4943.56	5865.81	6513.13	3289.81	5040.4	5522.43
RPA1_Hela_gRNA1900	RPA1	4415.37	4209.02	4730.18	4873.73	5320.15	4023.98	5321.04	4607.17	6964.13	4518.39	7121.26	5037.67
BOP1_Hela_gRNA125	BOP1	6052.99	7037.92	6093.28	5798.28	10812.1	10412.7	7882.96	8775.87	7872.17	7102.06	6427.29	6551.47
RPL30_Hela_gRNA195	RPL30	2773.38	2084.21	1654.48	2261.34	65.4136	178.188	244.597	279.237	458.544	86.6422	76.8712	213.103
PSMB3_Hela_gRNA683	PSMB3	5938.44	4647.71	3642.95	6045.76	7641.88	5800.73	4548.32	7534.77	6692.63	5131.82	5634.02	8089.27
EPRS1_Hela_gRNA3756	EPRS1	5547.85	4313.62	4386.88	4123.65	4636.07	3571.88	4906.75	4046.85	4489.66	5420.34	4684.87	4452.12
UBA52_Hela_gRNA325	UBA52	6009.35	6294.79	4713.13	4702.72	2801.73	3438.56	3447.21	2330.82	1007.59	1181.8	1222.47	602.831
ELOC_Hela_gRNA410	ELOC	5387.47	5801.45	4453.53	5704.43	3939.56	4364.12	2513.25	3302.84	3893.85	4086.91	2285.85	3358.77
NARS1_Hela_gRNA1808	NARS1	6495.95	5322.16	5429.94	5621.71	8054.63	4949.1	6415.8	5724.12	8867.69	5049.51	6658.97	6749.21
gRNA_NT67	na	4257.17	3228.58	4507	4331.51	5608.99	5125.15	4521.23	4562.4	6124.73	6426.25	4290.91	4181.42
DDX27_Hela_gRNA1428	DDX27	3932.04	4288.64	4738.7	5463.22	3557.21	4318.39	5153.46	6704.45	1340.94	1251.11	1381.55	1993.76
XPO1_Hela_gRNA3286	XPO1	4190.62	3860.87	3945.95	3439.62	718.168	507.644	886.135	423.701	175.725	171.552	67.2623	100.792
LSM7_Hela_gRNA215	LSM7	3321.07	2713.38	2904.44	3739.93	4523.67	4105.59	3930.05	5217.34	4678.96	2839.27	3523.26	3692.82
LTA4H_Hela_gRNA1284	LTA4H	4507.01	3506.47	5110.67	4410.75	4647.13	4270.11	6993.86	5762.89	4164.6	5618.75	6935.49	7583.39
EIF3B_Hela_gRNA2082	EIF3B	7879.36	5518.87	6647.36	7863.58	7454.39	4751.26	6756.46	8604.64	2544.62	2118.4	2184.42	2904.73
SPOUT1_Hela_gRNA498	SPOUT1	9622.82	9262.64	9618.44	11084.9	13900.9	12052.7	12979.3	13877.4	11497.5	9754.18	11482.6	10375.8
HYOU1_Hela_gRNA373	HYOU1	4957.61	4324.54	4940.18	4241.83	2912.29	3065.52	3907.2	2288.82	1540.8	1389.74	1052.71	1087.59
DYNC1H1_Hela_gRNA5684	DYNC1H1	2810.47	4062.26	4548.07	4247.39	484.153	1022.55	715.171	930.019	503.795	42.4547	23.4884	461.723
CCT7_Hela_gRNA1246	CCT7	4116.43	5219.12	6113.43	3927.62	5403.99	8786.77	8017.53	4396.71	3516	9152.88	6950.44	4873.53
TRRAP_Hela_gRNA3155	TRRAP	2752.65	3739.09	4442.68	2770.88	1685.09	3298.83	3678.69	1821.73	3259.58	3269.01	4306.92	2349.89
NIFK_Hela_gRNA737	NIFK	5939.53	5384.6	5030.08	4802.12	5742.58	6484.43	4898.28	4443.78	7331.42	6500.77	7002.75	4424.28
RPL17_Hela_gRNA270	RPL17	5968.98	5938.83	4848.74	5276.22	2080.8	2306.19	1665.21	2021.12	355.221	458.337	448.415	456.923
gRNA_NT53	na	7951.37	6276.05	4415.56	7364.46	9733.27	9902.91	6137.77	11367	10767.5	9303.64	4453.19	10468.9
HMG20B_Hela_gRNA691	HMG20B	5786.78	5486.08	3997.09	3844.9	4675.23	4787.15	3131.09	3518.84	5615.65	4324.31	4341.09	3467.24
AARS1_Hela_gRNA1883	AARS1	6846.17	3924.88	6166.12	6619.26	7324.48	5542.64	7787.32	7156.3	6395.48	4613.7	7250.45	7046.79
DDX23_Hela_gRNA1565	DDX23	5877.34	5075.49	5036.28	5174.73	8571.03	6399.39	5481	7172	9351.88	5718.39	7856.88	6304.77
COX7A2L_Hela_gRNA73	COX7A2L	4415.37	3845.25	5427.62	4740.95	7703.14	7300.59	6796.66	5713.97	7550.13	5861.35	9290.74	5636.66
gRNA_NT23	na	5168.17	6591.42	5102.14	5755.18	8926.19	9734.55	8188.07	9662.05	9929.58	8744.8	7345.47	9795.05
MARS1_Hela_gRNA1138	MARS1	4588.84	5497.01	4531.8	5549.42	6554.26	7593.3	6434.42	7817.24	8098.43	10028	5700.21	7510.43
WARS1_Hela_gRNA1359	WARS1	5721.32	3954.54	4505.45	4752.07	6205.08	4601.7	3827.22	5154.57	5344.15	2887.79	4612.27	4828.41
UBA52_Hela_gRNA359	UBA52	7064.37	6475.89	6700.83	6451.73	2750.6	2943.74	3279.21	2774.83	528.683	376.027	104.63	474.202
DDX27_Hela_gRNA2076	DDX27	5177.99	5464.23	4944.83	4922.39	7544.68	5863.55	6887.64	5770.74	7565.97	7242.42	5350.02	5131.74
gRNA_NT70	na	2503.9	2975.66	2698.31	3025.31	2403.26	3544.11	2309.7	3673.46	2022.72	4923.88	2244.21	3592.99
LDHB_Hela_gRNA376	LDHB	4273.53	4279.27	4474.45	4704.8	5028.1	4880.31	5971.46	5814.12	4649.54	4722.87	5000.9	7145.66
RPLP0_Hela_gRNA875	RPLP0	4580.11	5197.26	5518.28	5084.36	1374.15	1804.53	1915.73	1113.25	454.773	479.998	144.133	311.015
RPS11_Hela_gRNA331	RPS11	4415.37	4447.88	6408.68	5837.9	3985.62	6156.25	7276.54	7135.99	4467.03	5150.88	6625.87	6744.41
GSTK1_Hela_gRNA489	GSTK1	6549.41	6475.89	6712.45	7299.12	8184.99	8454.75	8468.21	9782.05	9127.89	9819.16	9441.28	12716.1
RPP21_Hela_gRNA136	RPP21	4594.3	3161.45	3274.08	4745.82	7216.69	4282.07	4132.76	7068.61	9490.65	3646.77	3469.88	6598.51
HMGB2_Hela_gRNA1076	HMGB2	5038.34	3920.19	4594.57	5600.86	6164.54	4720.49	6208.02	6210.13	7750.75	4337.31	8580.75	6786.65
TMEM50A_Hela_gRNA723	TMEM50A	3505.46	3706.31	4215.62	3857.41	4651.74	4158.58	5848.32	3967.93	4671.41	5576.29	8434.48	4281.25
ELOB_Hela_gRNA388	ELOB	5519.48	5297.18	5051.77	6268.2	6670.81	4585.03	5041.74	5821.51	5468.59	3471.75	3710.1	3855.05
YJU2_Hela_gRNA252	YJU2	6756.7	6240.15	4709.25	5550.81	8398.28	9144.86	7078.07	6659.22	9272.69	8173.83	5672.45	5951.52
UFD1_Hela_gRNA989	UFD1	5408.2	6681.97	6217.27	5938.7	7593.97	9355.52	8646.79	8063.71	6527.46	9333.97	6702.74	8043.19
LTA4H_Hela_gRNA1609	LTA4H	5960.26	6375.97	6429.6	5569.57	5309.1	6526.73	5207.2	5469.81	8848.84	9132.96	9658.01	7443.24
DCTN2_Hela_gRNA628	DCTN2	5636.22	4757	3853.73	5601.55	6385.2	5326.42	4102.71	6515.67	4751.36	3721.28	4979.54	7404.84
UBA52_Hela_gRNA385	UBA52	4439.37	4465.05	4177.65	4113.23	2874.05	2054.08	2730.34	1835.58	868.066	616.026	303.214	979.121
EIF3D_Hela_gRNA1844	EIF3D	6561.41	6444.66	7147.96	7328.31	3954.3	3357.8	5920.68	3762.08	1632.81	1277.97	1676.22	1068.39
CCT2_Hela_gRNA1737	CCT2	4920.51	4639.91	5548.5	5308.89	6978.53	5174.72	6478.01	5140.72	4916.52	2766.49	5005.17	4380.13
gRNA_NT50	na	5189.99	4141.88	3210.54	3256.8	8555.82	7971.89	5196.62	6603.37	8998.92	7470.29	3537.14	5214.3
DDX23_Hela_gRNA2424	DDX23	4514.65	6216.73	5582.6	6318.26	5794.63	10326.4	6989.21	7721.24	6250.67	9347.83	7421.27	8207.34
PAM16_Hela_gRNA170	PAM16	5218.36	5159.79	4482.2	5573.75	8478.43	7324.52	5808.96	6897.37	9403.92	6661.05	4834.34	7081.35
PSMA6_Hela_gRNA355	PSMA6	5747.51	4174.67	3869.23	4410.06	2650.17	1543.02	1075.3	1344.03	1175.77	541.514	480.445	502.039
gRNA_NT99	na	10410.5	9011.29	9136.43	10583	15826.4	14496.9	11760.5	15355.7	15625.2	13748.4	12296.2	15581.5
gRNA_NT91	na	2562.81	3034.99	4128.06	4590.1	3189.14	4500	4297.37	6984.61	3533.35	5279.98	5536.86	6185.74
CKAP5_Hela_gRNA4866	CKAP5	5629.68	6140.23	5653.12	5675.93	5762.39	6285.3	5481	6723.37	7587.09	10069.6	6997.41	11206.1
CFAP298_Hela_gRNA1427	CFAP298	3589.46	3178.62	4660.43	5434.71	3158.28	3781.26	3356.22	5207.19	3501.68	4559.98	5063.89	7860.8
WARS1_Hela_gRNA1668	WARS1	5449.66	5303.42	5853.83	4363.48	7591.66	7798.83	5719.25	5629.96	9290.04	8429.42	7580.35	4935.92
ANXA2_Hela_gRNA310	ANXA2	3845.85	3814.03	4373.71	4414.23	1396.26	1604.12	1418.07	1888.19	799.435	1078.7	665.149	766.018
ARPC5L_Hela_gRNA1622	ARPC5L	4790.68	6032.51	5577.18	5035.7	7347.52	8420.14	6858.87	5840.89	7716.81	9623.35	7327.32	5606.91
EIF4A1_Hela_gRNA624	EIF4A1	3772.76	5303.42	3960.67	4164.67	3387.23	6195.57	4863.58	5009.64	5451.24	7891.37	6573.55	5433.16
CPSF1_Hela_gRNA1149	CPSF1	2552.99	2836.71	2416.23	2788.26	1507.28	2206.2	1841.67	1686.96	381.617	372.562	270.117	422.366
SF3B6_Hela_gRNA380	SF3B6	4435.01	2978.78	3801.04	4381.56	4016.03	4400.86	2750.23	3585.77	5138.25	4317.38	4253.54	4626.83
NIFK_Hela_gRNA738	NIFK	5709.32	5634.4	4315.59	4238.35	5491.52	5934.91	6141.58	4169.63	6829.13	5973.98	7097.77	4771.77
SBNO1_Hela_gRNA2201	SBNO1	4767.77	3988.88	6118.85	4894.58	5427.03	3585.13	7152.55	5592.12	3495.64	2659.92	5700.21	3250.3
IARS1_Hela_gRNA897	IARS1	3855.67	4599.32	3997.09	5439.58	3437.44	4161.57	2916.12	4939.49	3233.19	5896.87	3468.81	6098.39
EMP3_Hela_gRNA509	EMP3	7129.83	6958.3	5756.96	6581.72	7603.18	7911.21	7304.9	8260.33	9962.01	6777.15	8503.88	8199.66
TRAM1_Hela_gRNA321	TRAM1	4621.57	4084.12	3780.89	4699.94	3296.94	3544.11	4984.19	4327.47	4796.61	5035.65	6377.11	5606.91
YAE1_Hela_gRNA246	YAE1	3214.15	3387.82	3461.62	3587	2528.56	3103.55	2366.83	3295.45	3994.16	3494.28	5074.57	4747.78
GMPPB_Hela_gRNA275	GMPPB	4127.34	6717.88	5205.99	4702.72	5335.36	8777.8	5693.44	7015.53	5946.74	7536.14	4502.3	6971.92
PDLIM1_Hela_gRNA863	PDLIM1	5919.89	6724.12	6297.86	6115.97	6426.66	6647.23	5569.44	5640.58	9262.88	8258.74	9289.67	9500.35
TSG101_Hela_gRNA478	TSG101	4056.42	5515.75	4708.48	4277.28	129.445	324.755	421.062	192.004	388.405	337.038	427.062	275.498
RPLP1_Hela_gRNA340	RPLP1	3864.4	2604.09	3620.48	3509.83	2072.97	2397.21	1536.56	1713.27	1056.61	1315.23	507.136	868.73
PAM16_Hela_gRNA169	PAM16	7535.69	5131.69	5337.72	5954.69	12344.3	7162.99	8739.47	8329.56	14592.7	5678.53	9712.46	9274.77
RPS6_Hela_gRNA442	RPS6	5306.73	6794.37	3958.35	5157.35	8992.07	10264	7362.87	9835.13	8738.73	7485.89	5857.16	7083.27
gRNA_NT15	na	3413.81	3216.09	3567.01	2873.77	3455.87	2843.32	3735.81	2303.12	5284.57	4310.45	5477.07	3050.63
gRNA_NT46	na	5161.63	5882.63	5299.75	4900.14	4803.75	6704.49	6090.38	5534.42	7266.56	9328.77	8932.01	7760.01
VARS1_Hela_gRNA2024	VARS1	5932.98	5151.98	5336.17	5648.13	5897.36	5574.68	5717.98	5804.43	5110.35	5492.25	6304.51	6221.26
RPL10_Hela_gRNA822	RPL10	2837.75	3351.91	4542.64	5019.71	1572.23	2100.66	2891.57	2233.89	380.863	486.929	466.565	1325.65
HMG20B_Hela_gRNA370	HMG20B	4163.34	4351.09	3981.59	4540.75	6453.84	3977.83	6411.15	5829.35	6695.64	5229.72	6609.85	6112.79
HDDC2_Hela_gRNA507	HDDC2	3006.86	3273.85	1985.37	2527.58	2388.98	2910.83	1046.52	2378.36	4761.92	4456.01	2331.76	2702.18
gRNA_NT39	na	4431.73	5358.06	6296.31	5339.48	5363.92	5558.45	6943.5	6387.36	6851.01	4688.21	10212.1	6278.85
TRAP1_Hela_gRNA1582	TRAP1	4368.45	5765.54	4563.57	4601.92	6022.66	9232.88	5954.54	5326.26	6347.21	8880.83	6932.29	5596.35
HAUS7_Hela_gRNA1029	HAUS7	7212.75	7440.71	6297.86	7146.18	11553.3	10255.9	8268.9	9794.05	11432.7	11394.3	8210.27	9852.64
MARS1_Hela_gRNA2226	MARS1	3964.78	6197.99	4140.46	5933.84	4496.96	6750.21	5013.39	6004.74	5178.98	7166.18	5527.25	8063.35
UFD1_Hela_gRNA681	UFD1	5696.23	8247.86	5641.5	5779.51	6063.2	8769.25	5135.69	5789.2	6476.18	12030.3	6333.33	6408.44
YJU2_Hela_gRNA339	YJU2	4527.74	4649.28	4358.99	4398.94	3970.88	4739.29	4257.59	5721.35	4953.48	7308.27	6521.24	6018.71
CFAP298_Hela_gRNA1482	CFAP298	4317.18	3882.72	3412.8	3715.6	5729.22	5345.65	5031.16	4330.24	6685.08	6114.34	6432.62	6093.59
EIF3B_Hela_gRNA961	EIF3B	4532.11	6308.84	5498.91	5924.1	365.303	1371.66	671.16	510.472	73.1558	181.949	138.795	266.858
UBA52_Hela_gRNA324	UBA52	5924.25	4611.81	4437.25	4651.28	2469.13	2255.34	2513.25	2115.27	1107.14	473.067	162.284	585.553
RPL30_Hela_gRNA381	RPL30	3405.08	4717.97	5413.67	4531.01	1922.79	1697.27	2119.7	1677.73	386.896	361.298	269.049	437.725
CDC5L_Hela_gRNA1293	CDC5L	5012.16	4319.86	2477.45	4008.95	824.119	740.101	978.387	885.249	176.479	134.295	253.034	528.917
KPNB1_Hela_gRNA1301	KPNB1	4838.68	5203.5	3773.91	3792.07	2217.61	1461.4	1618.66	1758.5	512.091	268.591	279.726	244.78
EIF1AX_Hela_gRNA493	EIF1AX	4114.25	5358.06	5302.08	5814.27	3878.29	5284.54	4547.47	3877	2267.83	4151.03	3903.35	3331.89
SFT2D1_Hela_gRNA312	SFT2D1	3926.59	5045.82	4701.51	3914.41	4736.04	5555.88	4780.22	4909.49	6094.56	5968.78	4552.48	5321.81
VIRMA_Hela_gRNA4784	VIRMA	3884.04	2530.72	3284.93	3087.18	4105.86	2931.35	4530.97	3338.38	4878.81	2468.44	5493.09	3674.58
LARS1_Hela_gRNA283	LARS1	2182.04	3668.84	2425.53	3984.62	2010.78	3639.83	2730.77	3145.45	1829.65	3982.94	2809	3018.96
DYNC1H1_Hela_gRNA13057	DYNC1H1	3249.06	5048.94	6174.65	3825.43	1756.49	3778.27	4964.3	2505.28	767.005	1280.57	1579.06	1202.78
INTS11_Hela_gRNA397	INTS11	8053.93	7439.15	5060.3	7304.68	11527.1	9930.25	7653.6	9692.97	12330.2	10503.6	6728.36	8718.97
HMGB2_Hela_gRNA1107	HMGB2	4931.42	5393.97	4118.76	3627.31	4489.59	5848.16	5299.88	5420.42	5952.77	7274.48	6010.9	5593.47
CIAO2B_Hela_gRNA245	CIAO2B	4490.65	4490.03	3207.44	4288.41	7238.34	5140.96	4496.69	6197.67	7593.88	5180.34	3684.48	5373.65
CNOT3_Hela_gRNA1010	CNOT3	5127.81	4666.45	4879.74	5029.44	5174.12	4739.29	6900.34	5343.34	5853.22	4273.19	6490.28	7722.58
RRM1_Hela_gRNA1333	RRM1	2622.82	4385.43	3664.65	4273.81	1428.97	2792.04	2781.55	2482.21	644.827	1839.41	1804.34	921.525
CFAP298_Hela_gRNA1068	CFAP298	4979.43	5344.01	4772.02	5109.38	5418.73	5708.43	5602.45	4525.48	6940.75	8662.49	6899.19	7412.52
CFAP298_Hela_gRNA1177	CFAP298	2274.78	4878.77	3981.59	4629.03	3367.88	6736.54	6153.01	6377.67	3090.65	6880.26	8136.6	7335.73
gRNA_NT6	na	4975.06	3489.3	5065.72	4769.45	6336.37	4217.55	6206.75	8043.86	7426.45	6347.41	7624.13	9955.35
SF3B6_Hela_gRNA385	SF3B6	5823.88	5284.69	6431.93	4543.53	6594.34	5457.17	6731.49	6160.74	7978.51	8296.86	7949.76	7668.82
RPS28_Hela_gRNA214	RPS28	4377.18	5183.21	4931.66	4979.39	5599.31	7742.43	5903.33	6406.75	4408.96	6140.33	5520.85	6281.73
RUVBL2_Hela_gRNA1698	RUVBL2	4404.46	4163.74	3534.46	4924.47	6294.91	6882.25	5767.07	6119.67	7937.03	6495.57	4742.53	6675.3
ELOC_Hela_gRNA378	ELOC	4569.2	4207.45	4303.97	3965.16	2516.12	2127.15	3068.89	3032.83	2404.34	2885.19	1971.96	3173.5
SFT2D1_Hela_gRNA357	SFT2D1	4388.09	5757.73	4438.8	3828.91	5626.49	5583.66	4185.65	4210.24	6811.03	7000.69	5577.43	5652.02
gRNA_NT37	na	5999.53	5952.88	5380.34	6917.48	7427.67	7351.44	8201.19	9494.97	7349.52	7954.62	7540.85	9054.95
WBP2_Hela_gRNA266	WBP2	5515.12	7895.03	5765.49	7344.3	6646.39	10278.1	7902	9870.21	6110.4	9780.17	8292.48	11435.6
RPLP1_Hela_gRNA265	RPLP1	3813.12	3960.78	4740.25	3920.67	767.919	569.604	1151.47	658.629	262.456	68.4474	46.9768	407.007
UFD1_Hela_gRNA505	UFD1	6117.36	5511.06	5705.82	6097.2	8784.77	7483.05	9298.91	7339.08	8867.69	8660.76	9213.87	6318.21
BUD23_Hela_gRNA236	BUD23	2887.94	2788.32	2924.59	3879.65	2598.12	4133.37	3881.81	4481.17	3632.15	4576.44	4389.13	4741.06
CNPY3_Hela_gRNA819	CNPY3	5562.03	5595.37	5694.19	6959.19	7486.63	7989.84	9196.93	9027.42	5860.01	5658.6	10000.7	9364.04
RACK1_Hela_gRNA725	RACK1	5141.99	6063.73	5777.11	6297.4	2442.88	3022.36	2834.45	2565.28	956.305	185.414	1098.62	961.842
KARS1_Hela_gRNA901	KARS1	6534.13	4775.73	5541.53	5879.61	4836.46	3628.72	4033.31	4404.55	2604.2	1813.42	1754.16	1499.4
KPNB1_Hela_gRNA1558	KPNB1	7739.71	8126.08	5818.96	7497.93	8466	8384.67	4963.03	7419.39	8786.24	8977	5729.04	7536.35
RPL30_Hela_gRNA207	RPL30	5463.84	5495.45	5495.81	4924.47	3205.27	3560.35	5110.72	3750.08	1059.63	1998.84	2943.53	2170.38
TRRAP_Hela_gRNA1651	TRRAP	4132.79	3918.63	4561.24	3720.46	2566.79	4138.92	3154.79	2548.67	1583.79	1569.09	809.283	831.293
GSTK1_Hela_gRNA591	GSTK1	6566.86	5540.73	7061.94	6573.38	8091.48	10079.8	8627.75	8300.94	6700.92	7376.72	6900.26	8003.83
HDDC2_Hela_gRNA506	HDDC2	3759.66	4819.45	5418.32	4858.43	3497.79	5066.61	8382.73	4488.55	4139.71	6395.06	9322.77	5557.95
MCM3AP_Hela_gRNA109	MCM3AP	3558.92	4171.55	3713.47	3659.29	2297.77	3452.24	3040.96	2575.44	3058.97	6654.12	5762.14	4704.58
SLC35B1_Hela_gRNA561	SLC35B1	5319.83	4839.74	5140.89	4411.45	6011.14	5558.02	6222.41	4411.94	8167.06	8007.47	8169.7	5753.77
DCTN2_Hela_gRNA1068	DCTN2	7192.02	6970.79	5870.1	6508.73	13022.4	10056.3	8702.65	9222.19	12423.7	9958.66	8612.78	8453.08
MARS1_Hela_gRNA518	MARS1	4922.69	5517.31	5491.16	5125.37	6203.7	5873.8	7567.69	7054.76	5495.74	4478.54	6610.92	5543.55
NOP16_Hela_gRNA765	NOP16	5774.78	5392.41	5794.16	5007.89	6045.69	5434.95	6206.75	5273.19	5253.64	5490.52	6557.54	5459.08
TRAM1_Hela_gRNA546	TRAM1	6413.03	4007.62	3553.83	4378.78	7978.62	5187.54	3931.32	4647.79	6561.4	5033.91	4754.27	4952.24
SPOUT1_Hela_gRNA1165	SPOUT1	4431.73	4697.67	3657.67	2689.55	4613.5	4268.83	4410.78	3310.22	5399.96	6257.3	5130.08	4906.16
gRNA_NT30	na	4633.57	4212.14	5088.2	4049.97	7839.04	5461.02	6586.76	5408.42	9929.58	5921.13	8134.47	5526.27
UTP4_Hela_gRNA615	UTP4	4702.31	6265.13	6906.96	6535.84	5780.81	7221.11	9656.92	8790.18	5702.38	5999.11	7577.15	7790.73
TMEM50A_Hela_gRNA825	TMEM50A	6629.05	5503.26	7274.28	6024.21	8961.2	5387.52	8479.22	6825.83	9227.44	3084.46	7643.35	7892.48
COPA_Hela_gRNA1867	COPA	3962.59	5242.53	5315.25	5299.85	4704.71	6018.66	6597.34	5182.26	5306.44	5914.2	8210.27	5809.45
CCT8_Hela_gRNA1095	CCT8	6906.17	5180.09	4817.75	5997.79	2282.57	2166.89	2414.65	2588.82	991.752	113.501	248.764	347.492
ANXA2_Hela_gRNA309	ANXA2	5579.49	5180.09	4758.08	3938.74	3372.95	3115.09	2222.95	2229.28	1859.82	1909.59	1241.68	1277.66
gRNA_NT41	na	4384.82	4477.54	3805.69	4539.36	9365.2	7385.2	6824.59	8027.24	6383.41	6836.07	5787.76	5156.7
TUBA1B_Hela_gRNA1105	TUBA1B	4120.79	4188.72	4241.97	6741.6	3778.33	3513.77	5531.36	5946.12	1663.73	1744.97	2733.2	3112.07
CNPY3_Hela_gRNA844	CNPY3	4543.02	4465.05	5010.7	4885.54	6018.51	5432.39	8803.79	6929.22	5452.75	5208.06	8661.89	6769.37
RAN_Hela_gRNA767	RAN	3846.95	4777.29	4367.51	4290.49	1599.87	1670.78	1614	1584.49	322.791	1045.77	372.612	632.589
TCP1_Hela_gRNA1834	TCP1	3533.82	4326.11	3357	3557.8	971.07	953.328	685.971	641.552	144.803	196.678	2.13531	71.0343
RPLP0_Hela_gRNA823	RPLP0	3677.84	4627.42	4730.18	4013.82	1823.29	2260.47	2409.57	1284.49	610.889	627.29	160.148	385.889
CDC16_Hela_gRNA892	CDC16	4312.81	5030.21	4673.61	5848.33	2664.91	4150.89	3418.85	4647.79	1689.37	2950.17	2000.79	1968.8
RPS6_Hela_gRNA469	RPS6	2907.57	3686.01	3624.35	3390.27	1214.76	880.686	1226.79	941.097	248.126	350.901	283.996	255.339
STK25_Hela_gRNA1163	STK25	3853.49	5326.84	6216.5	5379.1	2992.44	6063.95	6625.27	7069.07	2976.01	4363.3	6668.58	6273.09
MLEC_Hela_gRNA873	MLEC	6375.94	6135.55	6665.96	5618.24	5719.08	5134.98	5965.96	5740.73	7391.75	5748.71	7566.47	6956.56
CKB_Hela_gRNA1331	CKB	3629.83	3795.3	5426.07	5162.91	5206.83	4722.63	6123.38	8886.18	6740.14	5860.48	7141.55	8155.5
LSM7_Hela_gRNA233	LSM7	5636.22	5393.97	5095.17	5098.26	6101.89	6865.59	7587.16	7861.55	5258.92	4522.72	5827.26	5815.21
MDN1_Hela_gRNA5826	MDN1	4634.66	3728.16	5364.85	3510.53	1893.77	2204.49	3388.39	2558.36	798.681	1047.5	2405.43	1413.97
SNRPD2_Hela_gRNA543	SNRPD2	4217.89	5014.6	6503.99	5944.96	3679.29	4423.51	6126.35	7028.45	4678.2	5623.95	5656.44	7590.11
TUBB_Hela_gRNA1494	TUBB	4413.19	4077.87	4965.76	4102.1	2148.98	2004.51	2507.75	1572.96	498.515	557.976	822.095	647.948
HMG20B_Hela_gRNA584	HMG20B	7756.08	5749.93	6461.37	5504.23	9514	9019.66	8111.9	5377.5	10858	8223.21	10047.7	6292.29
SLC29A1_Hela_gRNA964	SLC29A1	5048.16	5887.31	4790.62	5463.91	4912.01	7040.78	4401.47	6897.84	7107.43	7169.64	5541.13	7819.53
CKB_Hela_gRNA1311	CKB	4328.09	3957.66	3838.23	4239.05	6040.16	5315.73	5576.22	7130.92	5099.79	4841.57	5794.17	6289.41
RUVBL2_Hela_gRNA1822	RUVBL2	4933.6	3775	5226.91	3538.33	5261.65	4247.46	6547.41	5124.11	5912.8	4462.07	6886.38	5427.4
CCT7_Hela_gRNA1431	CCT7	6488.31	3746.9	5009.15	4737.48	7247.55	5199.51	6199.98	5044.26	4781.53	4833.77	4667.79	3474.92
PRPF8_Hela_gRNA5243	PRPF8	3073.41	3481.49	3955.25	3980.45	2924.26	3502.66	2440.47	4436.4	3119.3	2947.57	3089.79	3215.74
EIF4A1_Hela_gRNA892	EIF4A1	3360.35	4123.15	3191.94	3102.47	523.77	610.626	325.424	624.013	608.626	356.966	30.962	418.526
COPG1_Hela_gRNA1635	COPG1	7014.18	8314.99	7342.47	6311.3	927.307	1313.98	843.817	628.628	678.011	588.301	478.31	428.125
WBP2_Hela_gRNA356	WBP2	4287.72	4010.74	4919.26	4606.09	6054.91	4715.79	5733.64	6664.29	6610.42	5515.64	5251.8	5315.09
RPL7_Hela_gRNA679	RPL7	3253.43	2961.61	3036.18	3061.46	744.886	518.327	560.288	454.625	386.142	95.3064	86.4801	191.025
AARS1_Hela_gRNA1280	AARS1	4875.78	3453.39	4571.32	4827.15	2199.65	1713.51	2265.27	2166.51	1112.42	887.216	796.471	1493.64
LARS1_Hela_gRNA1224	LARS1	4068.42	4322.98	4090.09	3626.62	4569.74	3745.8	3537.77	3918.08	8444.6	6869.86	5166.38	4655.62
CWC22_Hela_gRNA1101	CWC22	2808.29	3072.46	3752.99	3901.9	32.7068	38.4579	48.2423	33.693	382.371	321.443	105.698	161.267
UBA52_Hela_gRNA354	UBA52	6733.79	8132.33	6351.33	6463.54	2694.86	3521.89	2229.72	3345.76	169.691	336.172	27.759	239.021
ARCN1_Hela_gRNA360	ARCN1	3807.67	2422.99	4671.28	3963.77	1814.54	1097.76	2391.38	2691.75	1355.27	920.14	1561.98	2154.07
EPRS1_Hela_gRNA4178	EPRS1	5199.81	5131.69	5168.79	4931.42	4312.69	4826.89	4268.6	4428.55	4896.16	5549.43	5806.98	6978.64
ARCN1_Hela_gRNA1194	ARCN1	3806.58	4614.93	2272.87	4051.36	1747.28	1954.52	1278	2052.5	3471.51	5165.61	2373.4	3512.36
CCT2_Hela_gRNA255	CCT2	5230.36	4660.2	3779.34	4094.46	4057.03	5029.86	2510.71	3190.68	4856.94	5886.47	3129.3	3578.59
RUVBL2_Hela_gRNA867	RUVBL2	6324.66	6119.93	6836.44	5648.82	8060.62	8333.82	8951.48	7620.16	8767.39	6977.3	9933.47	6951.76
RAN_Hela_gRNA863	RAN	4242.99	5406.46	4455.85	4169.53	4846.14	4939.7	4404.44	4974.57	2919.45	3954.35	3212.58	3348.21
TCP1_Hela_gRNA650	TCP1	6717.43	7226.83	6220.37	6647.76	8609.26	7629.62	8575.7	9052.8	9017.78	9083.57	9155.15	8545.23
CWC22_Hela_gRNA761	CWC22	3438.9	4113.78	3175.67	4734.69	3862.63	3309.94	2678.29	5037.8	4279.99	3232.62	2330.69	4327.33
G6PC3_Hela_gRNA1198	G6PC3	6630.14	5804.57	5519.06	5648.82	8454.02	10629.8	10207.5	8015.24	8197.22	11020	10440.6	6137.74
PDLIM1_Hela_gRNA321	PDLIM1	5214	6194.87	5379.57	5271.35	6042.01	6255.82	6946.47	6581.68	6323.08	6174.99	7410.6	6579.31
SPOUT1_Hela_gRNA852	SPOUT1	4706.67	4864.72	5806.56	3920.67	7538.69	6520.75	8658.64	6121.05	5799.67	5777.3	6707.01	6801.05
RPLP0_Hela_gRNA916	RPLP0	7800.81	6004.4	6942.61	5486.16	1179.29	1375.51	1390.14	1127.1	442.706	500.792	136.66	316.774
RPS11_Hela_gRNA394	RPS11	3917.86	4527.5	5672.49	4816.72	1966.09	2213.89	3022.76	2235.74	1769.32	1148.88	936.334	1153.83
PRPF8_Hela_gRNA5348	PRPF8	5174.72	3611.07	4310.94	4838.27	5194.39	3307.81	4508.54	5445.34	3266.37	3214.43	4912.28	3467.24
DCTN2_Hela_gRNA579	DCTN2	5510.75	5080.17	5756.96	6503.86	7851.02	6338.71	7233.38	9287.73	7786.19	5171.67	6945.1	9097.18
ANXA2_Hela_gRNA298	ANXA2	4507.01	4885.02	3698.74	3612.72	6270.49	5427.69	4702.35	5948.89	6703.94	6206.18	4917.62	4407
PSMD2_Hela_gRNA949	PSMD2	4175.34	6098.08	4934.76	5192.11	5878.47	7428.78	6059.06	6389.67	6231.82	9531.51	5514.44	6162.7
EPRS1_Hela_gRNA3496	EPRS1	6625.78	4426.02	5159.49	5756.57	8656.25	6510.07	5998.12	8190.63	10875.3	7829.86	6676.05	7690.9
BUB1B_Hela_gRNA2032	BUB1B	5158.35	4552.48	4290.02	4427.44	4757.23	4162.42	3798.02	5253.8	5394.68	4177.02	3165.6	4475.16
DDX47_Hela_gRNA684	DDX47	4826.68	3615.76	5863.13	4661.7	5093.51	3260.37	4226.7	3950.85	3686.45	4638.82	4193.75	4043.19
PRELID3B_Hela_gRNA183	PRELID3B	3844.76	5036.46	3993.22	3552.24	4942.41	4864.07	3779.82	3340.68	5264.2	4802.58	4528.99	2754.98
gRNA_NT64	na	4184.07	4988.06	4540.32	4656.84	5925	6318.2	4829.73	6753.83	5467.08	5928.93	5347.89	6665.7
LSM8_Hela_gRNA428	LSM8	4378.27	5300.3	4033.52	3890.08	1968.4	2550.61	1705.83	1980.96	1214.99	1154.07	808.215	908.087
gRNA_NT28	na	2969.76	2671.23	2967.99	2509.51	2876.36	2992.45	2832.75	3127.45	3792.79	3918.83	4293.04	3653.46
gRNA_NT100	na	5947.16	5935.71	4052.11	4637.37	7044.4	5984.05	5102.68	5137.95	9170.12	6430.59	5829.4	6044.63
CIAO2B_Hela_gRNA437	CIAO2B	3234.88	3415.92	3206.66	3537.64	4432.92	3959.03	5197.89	5035.49	3766.39	5055.57	7303.83	6481.4
BUB1B_Hela_gRNA762	BUB1B	3399.63	4919.36	3950.6	4380.86	3425	5685.36	3909.32	4191.32	2838.75	5047.78	4587.72	4191.02
BUD23_Hela_gRNA241	BUD23	6068.27	6355.68	5450.09	6165.32	6878.56	5918.67	4522.5	4320.09	1682.58	1267.58	1349.52	1316.05
VIRMA_Hela_gRNA5006	VIRMA	5075.44	4143.44	4055.99	3883.13	5982.58	4973.46	4470.45	4425.78	5788.36	5363.15	4979.54	5413.96
EIF3D_Hela_gRNA842	EIF3D	3244.7	5348.7	4216.4	4022.16	2907.22	6115.23	4521.23	4225.93	3159.28	6194.92	4237.52	5255.57
SDF4_Hela_gRNA1147	SDF4	6145.73	4352.65	4995.2	4944.63	11825.1	5102.93	9499.07	9265.58	11505.8	4499.33	8340.52	6733.86
MLEC_Hela_gRNA694	MLEC	5781.33	3937.37	4008.72	3726.03	9256.03	6902.76	6793.27	4987.95	8947.64	5888.21	6386.71	3722.58
VIRMA_Hela_gRNA1700	VIRMA	5782.42	7567.17	4962.66	4768.76	8292.79	10172.5	6890.18	5473.04	10176.2	9643.28	9605.7	6148.3
gRNA_NT77	na	2952.31	2838.28	4278.39	4512.25	3574.72	3365.92	4740.44	5664.58	3130.62	5400.41	5499.49	7095.75
RPL17_Hela_gRNA132	RPL17	3725.84	3479.93	5151.74	4288.41	725.538	385.433	885.288	762.477	95.7813	311.046	226.343	363.811
MCM3AP_Hela_gRNA2505	MCM3AP	6846.17	5083.29	5554.7	5445.84	8394.13	5614.85	7539.76	6443.21	6588.55	5591.89	6324.79	5492.68
DDX23_Hela_gRNA2410	DDX23	5966.8	5364.31	5134.69	4123.65	7545.14	6184.88	5476.35	6628.75	7661.75	5794.63	5520.85	5852.65
EIF3B_Hela_gRNA876	EIF3B	4372.82	5281.56	5236.21	4412.84	1564.86	1106.31	1770.15	1174.18	935.942	282.454	210.328	419.486
EIF1AX_Hela_gRNA336	EIF1AX	6877.81	6713.19	4710.03	5869.88	3794.45	4209.43	2836.14	3275.15	1621.5	2458.91	693.976	1300.69
PSMA6_Hela_gRNA238	PSMA6	5326.37	5681.23	5651.57	5333.92	3947.85	4056.88	4355.77	3983.62	3377.23	3106.12	2875.2	2268.3
SMU1_Hela_gRNA665	SMU1	3665.84	3952.98	3289.58	3778.86	749.032	843.082	731.675	877.403	288.852	244.331	340.582	489.56
EIF1AX_Hela_gRNA449	EIF1AX	3966.96	3269.17	5429.17	6225.8	4719.91	3897.49	4644.38	6050.43	5034.18	4722.87	5718.36	7300.21
RPLP1_Hela_gRNA264	RPLP1	4431.73	4416.66	4517.07	4442.73	1837.11	1561.82	1655.05	1753.42	702.899	544.113	372.612	572.114
gRNA_NT19	na	6159.91	4504.08	4396.18	4894.58	8969.96	5230.7	6563.49	5457.34	11535.2	4441.28	7113.79	5679.86
RPS6_Hela_gRNA111	RPS6	4737.22	4291.76	4971.96	3750.36	2027.82	1944.26	2739.23	1278.03	841.669	505.124	443.077	271.658
HADHB_Hela_gRNA1010	HADHB	6453.4	5448.61	5282.7	5627.97	5553.71	4182.51	3806.91	4706.41	11256.2	6530.22	6126.21	7058.31
G6PC3_Hela_gRNA764	G6PC3	4599.75	4914.68	4386.11	5611.98	8416.24	8186.4	9914.63	10519.1	9698.8	5909	7990.33	8024.95
EIF3D_Hela_gRNA1495	EIF3D	6326.84	4757	5528.36	6683.91	3395.52	3123.21	3516.19	2918.83	542.258	620.358	661.946	542.356
UTP4_Hela_gRNA308	UTP4	2196.23	3578.29	2343.39	3007.24	2106.13	2874.51	1892.03	2467.44	2463.92	3738.61	3299.06	2872.09
EIF3B_Hela_gRNA1590	EIF3B	5641.68	6614.84	5401.27	6158.37	1982.22	3356.52	2672.37	3156.53	750.413	1460.79	356.597	738.18
PRELID3B_Hela_gRNA570	PRELID3B	3531.64	4530.62	4255.15	4866.08	2629.9	4178.24	3235.2	4353.78	2207.5	3860.78	3135.7	4183.34
GSTK1_Hela_gRNA504	GSTK1	4424.1	5245.66	4338.06	5091.31	4985.72	6610.06	6417.49	6025.97	6605.9	9400.68	6874.63	6550.51
COPA_Hela_gRNA585	COPA	3379.99	3554.87	2638.64	3849.76	3302.47	3936.81	2732.04	3939.77	3823.71	5537.3	3484.83	4477.08
VIRMA_Hela_gRNA2158	VIRMA	7100.37	8884.83	7178.96	7976.2	10488.8	12603.9	10909.5	12063.5	9662.6	10249.8	9555.52	11050.6
SNU13_Hela_gRNA318	SNU13	4803.77	3698.5	4667.41	5093.39	6564.86	3776.14	6887.64	7940.93	7774.13	4925.61	8573.27	7156.22
gRNA_NT45	na	3190.15	3967.03	5355.55	4713.84	3007.18	3862.45	5769.18	4037.62	5247.61	4849.37	7070.01	5835.37
WARS1_Hela_gRNA1140	WARS1	5459.48	4486.91	5171.89	5293.6	6493.45	6057.12	5794.15	5338.73	8954.42	6220.05	7440.49	6593.71
MDN1_Hela_gRNA7162	MDN1	6699.97	5300.3	4616.26	5433.32	4890.36	3927.4	3204.3	3354.07	823.569	1108.15	448.415	1332.37
TRRAP_Hela_gRNA2597	TRRAP	4680.49	4675.82	2634.76	5069.06	5724.61	5790.9	4740.86	6791.68	4729.49	5242.72	5232.58	6078.23
GMPPB_Hela_gRNA1193	GMPPB	7345.85	7462.57	6065.38	5641.87	10744	7008.74	6420.46	6883.53	8265.1	8639.96	5255	5854.57
HDDC2_Hela_gRNA195	HDDC2	3732.39	4399.48	3895.58	4461.5	4529.2	5173.44	3619.02	5084.88	5225.74	7236.36	5465.33	7558.43
STK25_Hela_gRNA634	STK25	6944.36	4377.63	4211.75	6852.83	10060.8	5727.23	6406.49	8769.41	10729.8	6562.28	6045.07	9847.84
CIAO3_Hela_gRNA1150	CIAO3	6373.75	4880.33	6090.96	6080.51	7761.65	7697.13	8504.61	8273.71	5231.77	6633.33	5115.14	7659.22
SRRT_Hela_gRNA1098	SRRT	5433.29	5737.44	7268.85	7195.54	3654.87	3764.6	4054.04	4060.24	1186.33	1494.58	1226.74	1198.94
BOP1_Hela_gRNA1991	BOP1	5888.25	5389.29	5152.52	6042.97	10329.8	8658.15	6844.48	9215.73	9561.54	8145.24	5883.85	7923.2
RRM1_Hela_gRNA2284	RRM1	5497.66	7361.09	5509.76	6888.28	5590.1	8322.71	6469.97	6810.14	5837.38	9328.77	7094.57	7853.12
PSMA2_Hela_gRNA392	PSMA2	4163.34	5180.09	5040.93	5130.93	2309.28	3189.44	2381.22	2748.98	1492.53	2657.32	1962.35	1404.37
SLC35B1_Hela_gRNA626	SLC35B1	6439.21	7546.88	5849.95	5953.99	5163.99	7809.09	5124.68	5541.81	7090.08	7323	7949.76	7929.92
BOP1_Hela_gRNA2074	BOP1	6250.47	8066.76	5698.07	6227.19	4615.35	5737.92	4784.03	4537.94	1267.78	953.931	535.963	1100.07
SLC29A1_Hela_gRNA1446	SLC29A1	6137	7069.15	5877.85	7497.93	7178.45	8866.25	8543.12	9831.9	8284.71	8584.51	9156.21	10845.2
HMGB2_Hela_gRNA1077	HMGB2	6510.13	5548.53	6278.49	5345.73	8034.82	5621.26	4843.27	5881.97	8848.08	6215.71	6238.31	6573.55
RPS11_Hela_gRNA349	RPS11	6022.44	6344.75	5560.9	6933.47	9310.38	7353.15	6054.83	7416.62	7498.09	6332.68	5319.06	6211.66
CCDC167_Hela_gRNA334	CCDC167	4580.11	4201.21	3570.88	5126.07	7148.05	5589.21	5457.73	6171.36	5303.42	4207.35	4854.63	5596.35
VARS1_Hela_gRNA2595	VARS1	5033.98	6703.82	6628.76	6150.72	4011.42	5778.94	5547.44	4976.87	1126	1201.73	1906.83	1732.66
NARS1_Hela_gRNA1738	NARS1	5467.11	5353.38	5199.01	6625.51	2138.84	2452.76	2427.77	3044.37	1142.59	833.498	1108.23	1815.21
gRNA_NT11	na	4849.59	4561.85	5231.56	5481.29	7535	9335.44	9810.96	9687.43	6330.62	7364.59	7534.44	7490.27
LARS1_Hela_gRNA975	LARS1	4981.61	3985.76	6070.81	4337.76	7125.94	5385.81	6788.62	5115.8	8657.28	5286.04	7368.96	5800.81
gRNA_NT4	na	2998.13	3537.7	3680.92	3349.25	2626.22	3459.93	3667.26	3867.31	4556.78	5464.52	6167.85	5485
RPLP2_Hela_gRNA477	RPLP2	3938.59	4165.3	3685.57	4325.25	1952.27	3067.23	2133.66	2619.29	633.514	602.163	267.982	369.57
CIAO3_Hela_gRNA1396	CIAO3	5747.51	5220.68	4618.59	5512.57	9194.76	7425.79	7606.2	8866.34	9250.06	6438.38	6156.1	6981.52
COX7A2L_Hela_gRNA189	COX7A2L	6332.29	6652.3	5152.52	5796.19	5843	7583.89	4923.25	7047.84	7440.02	8173.83	5904.13	6843.29
LTA4H_Hela_gRNA1911	LTA4H	4812.5	4424.46	5220.71	5482.68	6102.81	6650.22	5027.35	7105.07	6856.28	7303.07	7244.04	8489.55
CCT7_Hela_gRNA612	CCT7	4695.76	5172.28	4840.22	4592.19	2606.41	2768.97	3279.21	2457.74	1115.44	654.149	500.73	514.518
gRNA_NT65	na	4488.47	5181.65	4636.41	5612.67	5703.88	6797.64	5899.52	8562.18	7271.84	5088.5	6044	7370.28
gRNA_NT66	na	6671.6	5648.45	6162.25	6831.97	8202.5	6113.95	7180.91	7210.3	8573.56	9181.48	8324.51	7771.53
PSMD1_Hela_gRNA1264	PSMD1	3359.26	3898.33	3652.25	4267.55	353.786	519.181	388.9	403.393	616.168	110.902	85.4124	307.175
VCP_Hela_gRNA1647	VCP	6233.01	4905.31	5468.69	7120.46	7037.95	5972.51	5806.42	7180.76	6426.4	6207.05	5314.79	6038.87
SF3A3_Hela_gRNA1072	SF3A3	6624.69	5862.33	6857.36	7376.98	7947.75	7130.95	9243.05	10860.7	10330.8	5552.9	8740.9	10985.4
PSAP_Hela_gRNA1384	PSAP	5134.35	5532.92	4343.49	5222.69	6472.26	5856.71	3541.58	4444.71	8360.13	7152.32	5702.35	5096.23
CIAO2B_Hela_gRNA423	CIAO2B	4905.24	3988.88	5124.62	5301.25	6119.86	4941.84	6754.77	6540.14	5178.98	5517.38	6121.94	6756.89
GMPPB_Hela_gRNA549	GMPPB	6906.17	6045	5375.7	5032.22	10121.1	7901.39	8849.5	6872.91	9245.54	9341.76	7214.15	7789.77
NEDD8_Hela_gRNA322	NEDD8	6907.26	7281.47	6098.71	6778.45	6211.07	4900.82	4574.98	4854.1	3245.25	2438.98	3079.12	2639.79
SLC35B1_Hela_gRNA913	SLC35B1	6226.47	6148.03	6445.87	7520.18	6926.01	6693.81	7535.95	9070.8	10299.9	7543.94	8668.29	10583.1
gRNA_NT86	na	2897.76	3561.11	4613.16	4141.73	3169.8	6454.09	6378.56	4900.26	2244.45	6765.02	5754.66	3673.62
PSMD2_Hela_gRNA1638	PSMD2	7979.74	7173.75	6707.8	7603.6	10088.4	8463.73	9098.75	10490.5	11713.2	8250.94	10601.8	12262
PDLIM1_Hela_gRNA323	PDLIM1	6242.83	8834.87	6036.71	7419.38	7788.37	10816.1	8700.96	10378.4	8261.33	11264.4	10500.4	11908.8
SF3B1_Hela_gRNA3061	SF3B1	4815.77	5746.8	5150.19	5061.42	4193.84	4348.73	4029.5	3593.61	1389.21	1134.15	2083	2431.48
gRNA_NT73	na	5552.21	6265.13	6790.72	5894.91	8066.6	10019.1	9420.79	9514.35	7682.87	10187.4	10567.7	7107.27
WDR75_Hela_gRNA852	WDR75	6054.08	5834.23	4038.16	4851.48	5430.25	8000.95	4106.1	5079.34	2334.2	5803.3	3384.47	2303.81
TUBB_Hela_gRNA317	TUBB	3636.38	4449.44	4323.34	3472.99	1327.62	1268.26	1067.68	760.631	593.543	454.005	193.246	410.847
WBP2_Hela_gRNA542	WBP2	6800.34	4502.52	5791.83	5536.9	8116.36	6264.36	6753.5	6565.52	12691.4	6863.8	8653.35	7574.75
DDX27_Hela_gRNA1483	DDX27	6381.39	6347.87	6054.53	5613.37	8136.62	8139.82	6930.81	8262.17	5760.46	5798.1	4952.85	5475.4
CWC22_Hela_gRNA914	CWC22	7102.56	3075.58	4513.2	4240.44	9197.52	4254.3	5933.38	4962.56	9576.63	4499.33	7605.98	5872.81
SDF4_Hela_gRNA589	SDF4	5208.54	5867.02	4496.92	4980.08	6148.42	5896.02	3788.29	5273.65	7311.06	7383.65	3598	6131.98
gRNA_NT26	na	5781.33	6683.53	5527.58	5066.28	8267.45	10445.2	9397.93	9370.35	6975.45	8801.12	8047.99	7136.06
SBNO1_Hela_gRNA2184	SBNO1	4539.74	5358.06	5082.77	4535.19	6085.31	5315.73	6747.15	5787.35	7511.67	7457.3	9365.47	7171.58
ARCN1_Hela_gRNA950	ARCN1	8553.62	5674.99	7261.88	7159.39	491.984	393.552	717.287	737.092	1527.98	626.423	60.8564	646.988
KPNB1_Hela_gRNA1555	KPNB1	5243.45	7407.93	6713.23	8075.6	3250.41	5666.98	4983.34	6034.74	2497.1	2318.55	2469.49	3837.77
DYNC1H1_Hela_gRNA9757	DYNC1H1	5101.62	4777.29	5947.59	5493.11	7661.22	6669.88	9611.22	6963.38	5623.95	4975	10334.9	7224.38
EIF4A1_Hela_gRNA947	EIF4A1	3027.59	2857.01	3800.26	3151.13	268.104	360.222	322.462	230.774	127.457	467.002	1.06766	544.276
EIF3D_Hela_gRNA1679	EIF3D	6981.45	8090.18	5542.31	6686.69	4718.07	5546.05	3469.64	4218.09	910.3	1174.87	952.349	1460.04
COPG1_Hela_gRNA2323	COPG1	7020.73	6700.7	8964.4	7522.26	3199.28	1837	2613.97	2873.14	2263.31	2062.95	1310.01	1886.25
gRNA_NT69	na	3359.26	3564.24	5171.11	5062.81	3807.81	4680.75	7092.88	7894.32	4780.77	4588.57	7144.75	6567.79
NOP16_Hela_gRNA666	NOP16	6950.9	5984.11	5932.87	4819.5	8778.32	6052.42	7640.05	5514.11	10530.7	5731.38	10828.2	6316.29
HAUS7_Hela_gRNA392	HAUS7	4300.81	5158.23	4500.02	5063.5	6092.68	7846.69	6187.71	7935.4	4999.48	6825.67	6994.21	7126.46
EIF4A1_Hela_gRNA946	EIF4A1	4452.46	4550.92	3425.19	3462.56	634.328	821.289	897.983	733.4	482.678	164.62	366.206	637.388
RAN_Hela_gRNA474	RAN	2738.47	3799.98	3049.35	4367.65	48.8299	33.7575	52.0509	47.0779	589.772	110.036	139.863	5.75953
EFTUD2_Hela_gRNA846	EFTUD2	4555.02	4449.44	4836.34	5064.2	524.23	1341.75	1162.47	1357.41	282.065	460.07	260.508	761.218
CIAO3_Hela_gRNA260	CIAO3	5548.94	4218.38	4241.97	6624.82	8249.49	6387.43	4530.54	9628.35	8756.83	6280.69	4985.95	9381.32
RPL30_Hela_gRNA184	RPL30	3014.49	3042.79	2448.01	2866.82	797.862	844.364	606.837	899.096	249.635	128.23	1.06766	246.7
IARS1_Hela_gRNA896	IARS1	3998.6	3545.5	4289.24	4199.43	3200.2	3386	4093.4	4377.78	5028.14	4388.43	5037.2	5905.44
NARS1_Hela_gRNA1800	NARS1	5912.25	5926.34	7832.23	7149.66	5704.34	7812.08	7599.01	5902.28	5707.66	5727.92	4585.58	3361.65
CCT8_Hela_gRNA427	CCT8	3315.62	3814.03	2666.54	3672.5	3295.1	3940.22	3269.47	4181.63	4230.22	4749.73	2735.33	4000
CKB_Hela_gRNA1415	CKB	6349.75	6727.24	6641.93	6676.95	7427.67	5586.65	6861.41	5568.58	3985.86	4570.38	5003.03	3592.03
TRRAP_Hela_gRNA8338	TRRAP	5539.12	6040.31	6497.8	5555.67	4958.54	7035.66	4897.01	6422.9	3011.46	6510.3	4610.14	4167.02
HNRNPU_Hela_gRNA1138	HNRNPU	5577.31	4872.53	4616.26	5367.98	762.852	1487.89	1878.91	1553.57	536.225	479.131	614.97	417.566
DDX23_Hela_gRNA1364	DDX23	4102.24	7520.34	6992.2	5643.96	5777.59	6843.37	8403.04	5908.74	4806.41	8624.37	5623.34	5407.24
DDX47_Hela_gRNA419	DDX47	4663.03	4305.81	5181.19	4959.23	4992.63	4574.78	5748.45	5689.5	8573.56	4484.6	7844.06	6581.23
CNOT3_Hela_gRNA1194	CNOT3	7554.24	5659.38	5139.34	5103.82	8707.38	5841.75	6803.85	5768.43	10652.8	7297.87	8693.92	5508.99
CWC22_Hela_gRNA446	CWC22	5079.8	5286.25	5436.91	5409.69	489.681	697.797	835.776	1050.48	656.894	1256.31	241.29	693.064
gRNA_NT94	na	3143.24	2101.39	4060.64	2819.54	3990.69	3213.37	4684.16	4708.25	3325.2	3480.42	5061.75	4509.72
KARS1_Hela_gRNA341	KARS1	8080.11	5593.81	6977.48	6877.16	7358.57	5442.22	6852.52	6126.59	8023.01	6181.06	8376.82	5513.79
gRNA_NT2	na	6562.5	5859.21	5155.61	6271.68	7595.35	6986.52	6359.52	9388.81	8744.76	7372.39	5385.25	11835.8
gRNA_NT32	na	2011.85	2874.18	2830.05	2232.14	2100.61	3018.94	3955.44	3178.22	3258.07	5026.12	5432.23	3940.48
PSAP_Hela_gRNA750	PSAP	6019.17	6849.02	7039.47	6717.97	5548.64	4755.96	5824.2	5579.19	4408.96	3991.61	4173.47	3529.63
RUVBL2_Hela_gRNA673	RUVBL2	4218.98	5931.03	5856.15	5677.32	6212.45	9588.41	7859.26	7920.16	4594.49	8930.21	9024.89	8890.8
CCT8_Hela_gRNA843	CCT8	2894.48	4880.33	4317.91	3801.1	185.646	319.2	476.921	495.241	651.615	113.501	145.201	195.824
RPL30_Hela_gRNA248	RPL30	4891.05	2980.34	3656.9	4519.2	6562.55	2850.16	4099.32	4665.79	6936.98	3693.56	3351.37	5477.32
EIF3B_Hela_gRNA874	EIF3B	5751.87	6279.18	5836.78	6838.93	1769.85	3315.92	2112.5	2101.43	88.2395	525.052	311.755	468.442
HYOU1_Hela_gRNA1582	HYOU1	4520.11	4438.51	5607.4	5745.45	3905.47	3700.08	3827.22	4774.71	1622.25	2436.38	2989.44	3129.35
VIRMA_Hela_gRNA2212	VIRMA	6331.2	5314.35	6537.32	5623.1	5714.94	4715.36	6078.1	5104.26	8277.17	6753.76	9781.86	6888.4
CNPY3_Hela_gRNA865	CNPY3	4812.5	4839.74	3912.63	6023.51	5297.12	4906.37	4430.25	6116.9	7585.58	6589.14	4426.5	7580.51
TUBB_Hela_gRNA318	TUBB	3771.66	4418.22	4761.95	3892.86	564.768	750.356	453.647	553.858	199.859	557.976	258.373	133.429
PSAP_Hela_gRNA778	PSAP	4316.08	5493.89	5414.44	3862.28	1660.22	2411.74	2254.69	2032.66	405.751	581.369	590.413	757.379
HMG20B_Hela_gRNA583	HMG20B	5545.67	5150.42	5419.09	4918.91	6762.94	5793.47	6062.45	5354.42	9272.69	6827.41	7904.92	6087.83
MAT2A_Hela_gRNA1058	MAT2A	6486.13	4797.59	3993.99	5806.62	3158.74	1809.23	1482.39	2383.43	1179.54	450.54	404.641	394.528
ITM2C_Hela_gRNA745	ITM2C	4824.5	6109	4152.85	5773.95	7019.99	8072.31	4569.47	6484.75	8255.3	8506.53	4597.32	6578.35
CCT8_Hela_gRNA502	CCT8	5596.95	7290.84	4413.23	4790.31	639.395	1051.61	464.649	621.705	468.348	358.699	28.8267	432.925
PAM16_Hela_gRNA259	PAM16	5436.56	4402.6	6263.77	7023.14	9626.86	8163.75	8184.68	9791.28	10751.6	7037.08	6288.49	8083.51
VCP_Hela_gRNA2845	VCP	5613.31	3974.83	4707.7	4157.02	7726.64	4114.14	4230.51	4833.33	5510.82	3953.48	4435.04	4048.95
DDX47_Hela_gRNA864	DDX47	6335.57	6527.41	6670.6	7724.55	6786.89	5331.54	5435.72	7574.93	5602.08	3976.01	4629.35	6383.48
RUVBL2_Hela_gRNA1630	RUVBL2	5656.95	5692.16	5916.6	6512.2	7664.45	7000.62	7334.94	8242.79	8030.55	4774.85	10022.1	8060.47
RPS28_Hela_gRNA226	RPS28	5605.67	5328.4	5596.55	6761.76	6519.25	6317.78	7219.84	8440.79	4876.55	4585.97	4447.85	3835.85
SFT2D1_Hela_gRNA443	SFT2D1	7418.95	6831.84	6790.72	6833.36	11520.2	10901.5	7636.67	9249.88	10241.8	9632.88	8197.46	7908.8
SPOUT1_Hela_gRNA952	SPOUT1	5650.41	5567.27	6681.45	6546.96	8347.15	7736.02	9824.5	9000.65	6946.03	6079.68	7907.06	7550.75
SNU13_Hela_gRNA503	SNU13	4197.16	4347.96	4582.17	5095.48	3800.44	5424.27	4366.35	5443.04	3417.96	6466.11	5092.72	6562.99
EFTUD2_Hela_gRNA420	EFTUD2	5296.91	4224.63	4252.05	4545.61	471.715	381.588	861.59	421.393	719.491	524.185	243.425	264.939
CSE1L_Hela_gRNA2393	CSE1L	4334.63	3478.37	4333.41	5112.16	1728.85	1224.67	1836.59	1763.11	543.766	82.3101	226.343	432.925
NIFK_Hela_gRNA328	NIFK	5219.45	5106.71	5070.37	5774.64	4396.53	4004.75	5059.51	5075.64	6174.5	3258.61	4675.26	5058.79
EMP3_Hela_gRNA571	EMP3	7062.19	6959.86	5988.67	7103.08	8479.82	8214.6	5766.65	8232.17	7809.57	7173.11	4666.72	6055.19
PAM16_Hela_gRNA351	PAM16	4106.61	4792.91	4784.42	4378.78	4736.5	4752.54	4065.47	4745.18	6311.01	5390.01	6123	6697.38
SF3B6_Hela_gRNA383	SF3B6	4595.39	5175.4	4582.94	5965.81	4889.9	5290.52	3431.13	4147.01	6034.22	5824.96	4433.97	5867.05
HDDC2_Hela_gRNA279	HDDC2	4252.81	4827.25	4535.67	5096.17	6986.82	6348.11	6177.97	7322.46	8586.38	5402.14	6134.75	5871.85
RPS11_Hela_gRNA364	RPS11	2997.04	3239.51	3128.4	2902.96	2175.23	2448.49	2300.4	1819.88	331.841	1049.24	1043.1	1004.08
PSMA6_Hela_gRNA434	PSMA6	4443.73	4942.78	3725.09	4745.82	4716.23	5763.13	2555.15	3905.62	7078.01	6548.42	3227.52	4383.01
SBNO1_Hela_gRNA3621	SBNO1	4357.54	4877.21	4051.34	5329.75	5265.34	5180.28	3428.16	5162.42	7460.39	6826.54	4682.74	9187.42
SARS1_Hela_gRNA1185	SARS1	2909.76	3205.16	3801.04	3205.36	386.493	374.323	423.601	377.085	175.725	234.8	46.9768	556.755
RACK1_Hela_gRNA1316	RACK1	5239.09	6062.17	5088.2	6478.84	6673.57	7604.83	5357.43	8878.34	5059.82	6036.36	3394.08	6737.7
TERF2_Hela_gRNA1590	TERF2	4259.35	3618.88	4817.75	3892.86	5422.42	4524.78	4383.7	5177.18	6800.47	5072.9	5308.38	6474.68
gRNA_NT20	na	2477.71	3676.64	3743.69	4485.83	3504.7	4849.97	4738.75	6395.21	5172.19	4531.39	4660.32	7130.3
STK25_Hela_gRNA432	STK25	6533.04	5119.2	3814.98	6048.54	7819.23	6834.39	3651.6	5707.96	11019.4	9424.94	4669.92	7901.12
CDC5L_Hela_gRNA2127	CDC5L	5997.35	5063	4668.96	5000.24	907.038	1204.16	578.484	1144.64	52.7929	400.287	176.163	1536.84
gRNA_NT14	na	2700.28	4599.32	4810	4566.47	2966.65	5872.52	5017.2	5500.73	4625.41	8013.54	5386.32	5955.36
KPNB1_Hela_gRNA1930	KPNB1	4318.27	4169.99	4155.95	4017.3	3752.99	4427.78	3704.08	3886.7	4150.27	6710.44	6998.48	4690.18
SARS1_Hela_gRNA76	SARS1	5574.03	5938.83	4979.71	4433.69	3511.61	3875.27	2867.88	3015.29	2660.76	3716.95	2467.35	2231.82
SMU1_Hela_gRNA564	SMU1	6812.34	8956.65	7505.98	8178.49	8114.51	10220.4	8334.91	8590.33	6633.8	6797.95	7396.72	7741.77
HYOU1_Hela_gRNA520	HYOU1	3782.57	4600.88	4167.58	3358.29	5141.88	5439.65	3996.49	4142.86	5644.31	5546.83	4238.59	4246.7
PRC1_Hela_gRNA1540	PRC1	5589.31	6160.52	4713.9	4916.13	5886.76	5991.31	5348.97	4741.94	5203.11	6667.12	5056.42	5208.54
IARS1_Hela_gRNA3619	IARS1	2981.76	4518.13	4779	5082.27	3050.95	4493.16	5817.43	6845.68	3177.38	3660.63	4237.52	4591.31
WARS1_Hela_gRNA1141	WARS1	4906.33	5695.28	5131.59	5098.26	5669.33	5013.2	4995.62	5251.03	7185.11	6933.98	6430.49	6648.42
INTS11_Hela_gRNA903	INTS11	4387	5183.21	4409.36	3705.17	5291.13	6198.56	4311.76	3134.37	5202.36	7503.22	5067.09	4791.93
HADHB_Hela_gRNA345	HADHB	4605.21	5406.46	3874.65	4506.68	4899.11	4283.78	4310.49	4617.79	5615.65	4425.68	3753.88	5654.9
PRELID3B_Hela_gRNA642	PRELID3B	3298.16	3228.58	3788.64	4157.72	3294.17	2728.37	3755.7	3847.46	3318.41	2944.97	4868.51	3537.31
gRNA_NT68	na	4952.15	5066.12	4939.41	4382.95	7224.98	7551.42	6188.13	6464.9	7608.96	7939.03	5202.68	6632.1
RPL7_Hela_gRNA831	RPL7	3155.24	4475.98	4622.46	4550.48	645.384	451.239	509.083	562.627	770.022	227.869	1.06766	764.098
EMP3_Hela_gRNA305	EMP3	5895.89	6187.07	5636.85	5765.61	6389.8	8913.26	6557.99	9074.5	6754.47	6378.6	6901.32	10683.9
TUBB_Hela_gRNA626	TUBB	3480.36	3517.4	4899.89	4346.8	254.745	249.122	220.476	234.466	506.811	104.837	288.267	592.272
SNRNP200_Hela_gRNA6096	SNRNP200	4942.33	4463.49	4210.2	5864.32	1009.77	755.484	575.522	677.553	709.687	166.353	286.132	795.776
CSE1L_Hela_gRNA2715	CSE1L	1776.18	2444.85	2837.8	2111.18	207.297	147.849	187.468	232.62	412.539	359.565	50.1798	0
CCT2_Hela_gRNA960	CCT2	3805.49	3632.93	3545.31	3712.82	1893.77	1897.68	2431.58	1866.96	655.386	810.971	657.676	1033.84
GSTK1_Hela_gRNA282	GSTK1	6102.09	5678.11	4653.46	5347.13	6553.34	6084.89	4235.59	5575.5	7679.1	7758.81	5261.41	5759.53
YAE1_Hela_gRNA195	YAE1	4560.47	6196.43	5503.56	6016.56	3391.37	3298.83	4134.87	4626.1	2476.74	5020.05	4086.98	6419
SNRNP200_Hela_gRNA4100	SNRNP200	4302.99	6113.69	4469.8	4786.83	301.732	568.749	419.369	236.774	255.668	363.031	83.2771	241.9
CIAO2B_Hela_gRNA214	CIAO2B	5101.62	5130.13	5777.88	5323.49	5799.7	6103.27	6545.29	5830.74	5152.58	5893.4	5672.45	4860.09
gRNA_NT92	na	4870.32	4714.85	5271.85	4615.82	6619.21	5474.27	8202.46	6736.29	7341.22	5668.13	10639.2	7387.56
RPS28_Hela_gRNA120	RPS28	3185.79	4246.48	3335.3	3835.17	5100.88	5521.27	3929.63	3861.31	4457.98	4010.67	2502.58	3584.35
SF3B1_Hela_gRNA1902	SF3B1	3172.69	2499.49	3091.97	3769.13	152.018	176.479	217.09	233.082	63.3514	188.014	38.4356	136.309
CKAP5_Hela_gRNA5748	CKAP5	5065.62	7070.71	5934.42	5858.76	6205.08	8055.22	6985.4	5833.04	6311.76	9002.99	8178.24	6240.46
CDC16_Hela_gRNA1105	CDC16	4623.75	5832.67	5970.07	5183.76	3622.62	5615.71	5553.79	4436.86	3313.13	3585.26	4910.15	2324.93
U2AF2_Hela_gRNA1167	U2AF2	6171.91	5874.82	5955.34	5584.17	8826.69	7862.93	6201.25	8083.55	7483.01	8192.02	6367.5	8605.7
PSMB3_Hela_gRNA231	PSMB3	4409.91	4566.53	5266.43	4789.61	5849.91	5770.39	8585.86	8552.49	4820.74	4138.9	8263.65	7729.29
BUD23_Hela_gRNA279	BUD23	5527.12	4463.49	4775.9	4921.69	7434.58	5959.26	5910.53	5541.81	10400.9	4818.17	5750.39	5625.15
NUP133_Hela_gRNA1462	NUP133	4178.62	3768.75	3328.33	2771.58	187.949	30.7663	258.562	88.1557	285.836	126.498	106.766	111.351
gRNA_NT74	na	2817.02	4045.09	2529.37	3008.63	3115.9	4201.31	2997.37	3893.62	3573.32	4789.58	2906.16	4075.83
UFD1_Hela_gRNA531	UFD1	4658.67	6196.43	4610.06	6183.4	4976.5	5472.13	4892.78	6230.9	6523.69	7415.71	5918.01	6824.09
SYPL1_Hela_gRNA442	SYPL1	6918.17	8285.33	5467.91	7533.38	8333.33	8245.8	4407.82	9583.58	7825.41	8117.51	4307.99	9816.17
TCP1_Hela_gRNA834	TCP1	4740.49	4451	5112.22	6995.34	5699.28	7768.07	6989.63	10172.5	4801.13	4765.32	8410.99	8044.15
DYNC1H1_Hela_gRNA2894	DYNC1H1	5401.65	4580.58	5361.75	4894.58	7325.4	6263.51	5258.41	6442.75	3267.12	3418.04	4409.42	4458.84
PRPF8_Hela_gRNA5343	PRPF8	3048.32	4016.99	3255.48	2821.63	1052.61	839.236	859.474	757.4	236.814	348.302	85.4124	256.299
RPP21_Hela_gRNA246	RPP21	4354.27	5724.95	6038.26	5835.12	6486.54	8015.9	7147.47	9911.74	6580.25	6690.51	6587.43	8428.12
MLEC_Hela_gRNA1225	MLEC	8122.66	5097.34	6139.78	5841.38	9846.13	5255.48	5453.92	7747.08	10432.6	5006.19	6181.72	6023.51
gRNA_NT35	na	4750.31	4956.83	4528.7	4354.45	5649.99	4729.04	5781.03	4185.32	7842.76	6360.41	6499.89	3953.92
HAUS7_Hela_gRNA904	HAUS7	6031.17	5779.59	4593.02	5764.91	9536.11	6850.63	7995.52	7346.46	10219.2	5728.78	7927.34	6096.47
TERF2_Hela_gRNA708	TERF2	4418.64	4338.6	4712.35	3860.19	5195.32	4560.68	5868.21	3813.77	7154.94	7155.78	8372.55	5610.75
CNOT3_Hela_gRNA2462	CNOT3	2710.1	3572.04	3772.36	3968.63	3884.74	4124.82	3843.3	6224.9	3806.37	3409.37	4708.36	5077.03
SLC29A1_Hela_gRNA996	SLC29A1	5602.4	5946.64	4628.66	5793.41	6257.6	6086.17	4661.3	5507.65	8379.74	9146.82	6648.29	7283.89
CDC16_Hela_gRNA180	CDC16	4224.44	4169.99	4325.66	6001.27	4946.1	4525.64	3693.07	6500.9	5822.3	6370.8	5004.1	6720.42
HAUS7_Hela_gRNA245	HAUS7	7605.52	6166.77	6728.72	4523.37	12608.7	9576.87	8594.32	6690.6	13139.4	8469.28	7442.63	7021.83
NEDD8_Hela_gRNA309	NEDD8	5988.62	5623.47	4741.8	4753.46	6131.84	6049.43	5486.5	5152.26	3445.87	4496.73	4426.5	3660.18
COPB1_Hela_gRNA944	COPB1	5758.42	6098.08	4949.48	5030.83	4795	6113.52	4048.12	4935.8	4979.88	6225.24	4266.35	4244.78
gRNA_NT98	na	4390.27	5807.69	4513.97	4412.14	7255.84	8614.14	5352.35	6173.67	7631.59	6710.44	5258.2	5219.1
EPRS1_Hela_gRNA2538	EPRS1	4923.78	4073.19	5328.42	4852.87	5806.15	4058.16	6962.55	4344.09	5695.6	2118.4	5327.6	2994
gRNA_NT47	na	3858.95	4892.82	3553.83	4614.43	5055.27	7144.62	4420.52	6513.37	6836.68	7467.69	3677.01	7136.06
UTP4_Hela_gRNA218	UTP4	5125.62	4796.03	4831.69	4581.07	5158.92	5503.75	4339.27	3814.23	6171.49	7198.24	7253.65	5113.51
NUP133_Hela_gRNA1371	NUP133	5552.21	4777.29	5598.88	5796.89	2072.97	1016.14	2127.32	2027.58	518.878	596.965	202.855	1202.78
RPLP0_Hela_gRNA411	RPLP0	2483.17	3108.36	4412.46	3190.76	1001.93	681.132	1253.03	1091.56	897.479	337.038	137.728	415.646
NARS1_Hela_gRNA936	NARS1	4588.84	5923.22	6293.99	6029.07	3599.59	5031.57	5115.37	5011.03	2261.8	3170.24	3195.49	2908.56
COPG1_Hela_gRNA526	COPG1	3403.99	3534.57	3047.03	4880.68	2476.04	2494.21	2332.13	3937.47	1978.98	2253.56	1597.21	3848.33
YARS1_Hela_gRNA1219	YARS1	4480.83	4930.29	5869.33	6129.87	5270.4	5693.9	6650.66	6336.13	6228.05	6200.98	7098.84	8525.07
WBP2_Hela_gRNA362	WBP2	4344.45	4483.79	5717.44	4658.23	5013.35	5649.89	6349.78	5074.72	6679.81	6570.08	7503.48	7013.19
RACK1_Hela_gRNA726	RACK1	6039.9	4863.16	6182.4	4964.1	1234.57	851.628	1315.24	1062.95	1270.8	49.3861	480.445	694.984
SFT2D1_Hela_gRNA329	SFT2D1	5821.7	7028.56	8476.19	6983.52	5933.75	8447.49	9988.27	9798.67	6801.98	9278.52	9365.47	8875.44
PRELID3B_Hela_gRNA188	PRELID3B	5832.61	6062.17	5438.46	5470.86	3629.53	4428.21	5569.02	3338.38	2038.56	2674.65	2574.12	1067.43
PSAP_Hela_gRNA1186	PSAP	4796.13	4198.09	5181.96	4306.48	5515.01	5328.13	5840.7	4593.33	6217.49	6031.17	5534.73	3753.3
XPO1_Hela_gRNA3284	XPO1	5241.27	5289.37	5174.99	4741.65	1672.19	1009.73	1728.68	1544.8	798.681	446.207	501.798	422.366
gRNA_NT82	na	3349.44	4646.15	3337.63	4037.45	3957.06	4878.6	3601.67	6205.51	5114.87	4813.84	4417.96	6811.61
MTREX_Hela_gRNA2354	MTREX	5569.67	4906.87	6692.3	5324.88	7002.94	6680.56	8011.6	5317.5	4056	3217.03	5057.48	2897.05
CIAO3_Hela_gRNA392	CIAO3	3412.72	4822.57	5151.74	3299.2	4275.38	5711.85	6097.15	4117.01	7488.29	7029.28	6862.89	4745.86
gRNA_NT5	na	3338.53	4855.36	4525.6	4781.96	4119.68	6886.53	6148.77	7757.24	4675.19	5921.13	6740.11	7096.71
gRNA_NT44	na	5116.9	6138.67	4796.82	5340.87	8724.89	7873.18	5966.39	6643.06	6503.33	7834.19	5440.77	6856.73
EIF3B_Hela_gRNA2083	EIF3B	6405.39	6349.43	7090.62	5378.41	3233.83	3141.58	4645.65	2687.59	1010.61	1138.48	873.342	1071.27
HNRNPU_Hela_gRNA2545	HNRNPU	6079.18	4675.82	4304.74	3765.65	4782.1	4006.46	3313.91	2950.68	3666.84	3859.04	2921.11	2444.92
DARS1_Hela_gRNA1018	DARS1	3793.48	4571.22	4554.27	4447.6	2144.83	3152.26	3081.58	3118.68	3560.5	3507.28	4075.24	3027.6
INTS11_Hela_gRNA646	INTS11	7075.28	6102.76	5297.43	6786.79	7874.97	6000.28	6438.23	6599.21	3740.75	4412.69	3997.3	3737.94
DCTN2_Hela_gRNA632	DCTN2	5350.37	4411.97	4230.35	4813.25	7774.09	5772.53	5238.94	6296.9	5224.99	4414.42	4459.6	4789.05
RPA1_Hela_gRNA281	RPA1	4991.43	4218.38	5295.88	3664.85	6194.49	6124.2	6659.97	4804.25	5961.07	7115.93	5800.57	5000.24
MARS1_Hela_gRNA1921	MARS1	5557.67	4135.64	4866.57	4939.07	7390.82	4346.6	5491.16	5600.42	9717.66	4700.34	6687.79	6658.98
RPS11_Hela_gRNA367	RPS11	3050.5	3252	3479.44	3498.02	2632.67	3371.47	4272.83	4053.78	3392.32	2446.78	3592.66	3753.3
CDC5L_Hela_gRNA1323	CDC5L	5510.75	5194.14	4454.3	4978	6770.31	5184.12	6032.4	5071.49	7392.51	5956.65	6717.69	5562.75
gRNA_NT63	na	5497.66	6521.16	6147.53	6502.47	7004.32	9099.56	8985.34	9207.42	5343.39	6978.16	10508.9	9019.43
SF3B1_Hela_gRNA3315	SF3B1	3682.2	4088.8	3705.72	3698.91	1292.15	1240.48	1260.65	1128.49	483.432	867.289	384.356	425.246
EIF4A1_Hela_gRNA893	EIF4A1	3765.12	2914.77	3107.47	3602.29	1257.6	712.325	654.656	1052.33	546.783	632.488	298.944	174.706
COPA_Hela_gRNA3781	COPA	4923.78	5776.47	7564.87	5899.77	6702.59	7323.66	7954.05	6358.29	7030.5	5335.43	6103.79	4086.39
UTP4_Hela_gRNA1739	UTP4	6651.96	5568.83	4761.95	4860.52	7120.41	6905.75	5068.4	5443.04	6903.8	5766.91	5094.85	5092.39
CPSF1_Hela_gRNA1684	CPSF1	3665.84	5017.72	4949.48	4750.68	3893.49	6698.51	5902.06	6447.36	4559.79	5227.99	6976.06	6790.49
CCDC167_Hela_gRNA247	CCDC167	4617.21	5201.94	4176.1	4133.39	5201.3	6018.66	4797.99	4285.94	5532.69	8476.21	7080.69	4842.81
SDF4_Hela_gRNA1201	SDF4	5156.17	3709.43	4351.24	4831.32	8266.07	5347.36	4638.88	7471.08	7947.59	4443.88	4020.79	5839.21
NUP93_Hela_gRNA2022	NUP93	5323.1	5212.87	6103.36	5922.71	7058.22	6616.47	8030.65	7051.53	7949.85	6675.78	9671.89	8296.61
LSM7_Hela_gRNA79	LSM7	5878.43	7740.47	4714.68	6041.58	8022.84	6688.25	6290.54	5564.42	9130.15	7670.44	6302.37	7739.85
PSMD2_Hela_gRNA924	PSMD2	4180.8	4732.02	4612.39	4492.78	2287.17	3237.3	3485.29	4327.01	1191.61	2729.23	2274.11	3200.38
CDC5L_Hela_gRNA994	CDC5L	5735.5	5395.53	5764.71	5935.92	2084.94	3118.51	3313.06	3049.91	992.506	1790.03	1666.61	1539.72
SFPQ_Hela_gRNA1386	SFPQ	4256.08	3533.01	3546.86	2991.25	314.17	310.654	260.678	349.392	184.775	376.894	13.8795	384.929
ARPC5L_Hela_gRNA1637	ARPC5L	4576.84	5123.88	5007.6	5564.01	5110.55	6430.16	6665.9	7776.62	4825.27	6990.29	5826.2	7685.14
RPS28_Hela_gRNA230	RPS28	5377.65	4550.92	5147.87	5805.93	1888.24	1548.14	1927.15	2168.35	1395.24	259.927	278.658	648.908
CCT8_Hela_gRNA1745	CCT8	4346.63	5270.64	5002.18	5883.09	4407.59	5787.06	5029.89	6199.05	6412.82	6219.18	7713.81	7056.39
SF3B1_Hela_gRNA1903	SF3B1	2010.75	3055.28	2726.98	2576.24	164.916	105.118	91.8296	16.6157	64.1056	597.831	149.472	229.421
MCM3AP_Hela_gRNA2371	MCM3AP	5386.38	6991.09	6557.46	7063.46	5186.1	8263.32	8116.55	8585.26	5646.57	7387.98	8430.21	7419.24
gRNA_NT31	na	4150.25	4938.1	3710.37	3739.93	6369.54	7340.33	5938.88	5489.19	6701.68	6372.54	4998.76	4349.41
PDLIM1_Hela_gRNA1023	PDLIM1	3752.03	2426.12	3918.83	2836.23	3694.49	2852.72	4691.35	2864.37	5979.92	3736.01	5255	3277.17
SFPQ_Hela_gRNA1865	SFPQ	4531.02	4107.54	3914.95	3484.81	2445.64	2279.7	2418.88	1746.96	1412.59	1201.73	1402.9	1299.73
HYOU1_Hela_gRNA691	HYOU1	6744.7	7220.58	5877.08	5300.55	7821.53	9430.73	7283.31	7262	7759.04	8432.02	7191.73	6986.31
gRNA_NT33	na	5466.02	5228.48	4704.61	5326.27	5766.07	6098.99	5845.78	6099.36	7864.63	8884.29	7103.11	6210.7
ELOB_Hela_gRNA177	ELOB	4260.44	4853.79	4175.33	5247.02	3561.36	4682.89	4360.85	5575.04	4375.02	4899.62	4471.34	5210.46
DDX27_Hela_gRNA1291	DDX27	6235.19	5901.36	8030.61	6462.15	8201.12	7859.08	9156.3	9527.74	7676.08	9167.61	8456.9	9963.03
GMPPB_Hela_gRNA552	GMPPB	5223.82	6276.05	5126.17	5106.6	6961.02	8191.96	6615.96	6312.59	8619.57	10099	8051.19	6366.21
SDF4_Hela_gRNA772	SDF4	5600.22	4668.01	5323	4478.88	8372.94	8123.16	6863.1	5351.65	7320.86	8200.69	6888.51	5184.54
GARS1_Hela_gRNA1293	GARS1	5179.08	5103.59	4007.94	4079.16	5391.56	5386.67	2451.05	3735.31	6604.39	6237.37	2630.7	4115.19
SNRPD2_Hela_gRNA669	SNRPD2	5211.81	4866.28	5448.54	4218.19	1108.35	1410.55	1333.43	845.095	480.415	84.9094	325.635	581.713
gRNA_NT83	na	2839.93	3074.02	5188.16	4359.31	3004.42	2457.46	5813.19	5486.88	3655.53	3003.89	8360.81	6519.79
TUBA1B_Hela_gRNA556	TUBA1B	4421.91	5067.68	6211.07	4222.37	1628.89	1593.87	1571.26	1095.25	631.252	642.019	495.392	627.789
SNRPD2_Hela_gRNA621	SNRPD2	5506.39	3547.06	5029.3	4517.81	5189.33	3242.43	4671.04	4507.02	5087.72	2368.8	3279.84	2922
DDX47_Hela_gRNA865	DDX47	5686.41	6955.18	6331.19	5630.05	2584.76	2956.98	3070.16	3108.99	468.348	928.805	412.115	1395.73
MLEC_Hela_gRNA901	MLEC	4920.51	4931.85	5147.09	5528.56	5966.92	5725.95	6179.67	5646.12	5717.47	5252.25	5060.69	4785.21
KPNB1_Hela_gRNA2189	KPNB1	6121.73	6257.32	5753.09	5028.05	6180.67	5931.91	5437.84	4706.41	4663.12	4528.79	4617.61	2445.88
gRNA_NT56	na	5967.89	5464.23	4563.57	5163.6	6189.88	5905.85	3812.83	5445.81	7864.63	7210.37	4895.2	5920.8
COX7A2L_Hela_gRNA187	COX7A2L	4882.33	6680.41	6955.78	5238.68	6168.23	8027.02	6415.8	5927.66	4780.77	7306.54	4873.85	4656.58
NARS1_Hela_gRNA1199	NARS1	4640.12	5762.42	6611.71	4793.09	6931.08	8286.82	8710.27	5980.74	5167.67	8137.44	8885.03	4738.18
PRPF8_Hela_gRNA6168	PRPF8	4927.06	3664.15	4923.91	5097.56	7523.03	4455.56	7732.31	6487.52	5089.99	3985.54	6305.57	4814.97
SDF4_Hela_gRNA357	SDF4	5823.88	5183.21	4768.92	5751.01	9892.2	6169.07	6434	9178.34	7720.58	5027.85	5673.52	7664.98
ITM2C_Hela_gRNA413	ITM2C	6361.75	5592.25	6992.2	6996.73	9389.16	6435.29	9604.87	10309.1	8391.05	7011.95	10005	11525.8
STK25_Hela_gRNA610	STK25	4056.42	3804.66	5323.77	5480.59	5591.02	5388.38	5525.43	5514.58	6679.05	5273.91	6473.19	5833.45
NUP93_Hela_gRNA1990	NUP93	4392.46	4527.5	5294.33	4530.32	4023.4	3554.36	8387.81	4520.86	5384.12	4105.11	7904.92	3226.3
HNRNPU_Hela_gRNA1517	HNRNPU	3216.33	3458.07	3288.81	3148.35	2467.29	2106.64	2558.53	2243.12	3013.72	1744.11	1389.02	2580.27
WDR75_Hela_gRNA382	WDR75	6327.93	7998.07	8484.72	9251.11	2310.21	2786.06	4146.3	4946.87	427.622	381.226	740.953	742.98
RPP21_Hela_gRNA450	RPP21	5315.46	4593.07	4806.12	4795.87	5552.33	6368.63	6224.1	6323.67	7391	8566.32	8389.64	5705.78
OAZ2_Hela_gRNA521	OAZ2	6061.72	5468.91	6379.23	6987.69	8346.22	6466.05	7628.2	8736.18	9180.68	6720.84	8558.33	8584.59
SF3B6_Hela_gRNA441	SF3B6	2679.55	2910.09	4534.12	2718.75	852.68	1119.98	3094.7	1550.34	1580.77	1272.77	4078.44	1967.84
G6PC3_Hela_gRNA767	G6PC3	4805.95	7187.8	6438.9	6380.12	7656.62	11648	7918.08	10418.1	5944.48	8362.71	7089.23	5574.27
SARS1_Hela_gRNA1108	SARS1	4534.29	4337.03	3958.35	3427.8	3887.5	3238.15	3509.41	2610.05	4738.54	5373.55	5294.5	3055.43
PSMD1_Hela_gRNA2105	PSMD1	4285.54	5272.2	4744.9	4195.95	3781.09	5765.69	4066.32	5084.88	2601.18	4137.17	3751.74	3105.35
WDR75_Hela_gRNA854	WDR75	4934.69	5030.21	5016.9	5083.66	3812.42	3346.69	3317.29	3179.14	638.794	1011.98	318.161	271.658
INTS11_Hela_gRNA630	INTS11	6751.25	5542.29	5807.33	5793.41	9854.42	7097.19	7162.29	7893.4	8698	7032.75	8630.93	8883.12
RUVBL2_Hela_gRNA594	RUVBL2	4280.08	4505.64	4303.19	5723.2	4684.9	4870.48	5898.25	8518.33	4806.41	4177.02	6101.65	6985.36
CCDC167_Hela_gRNA70	CCDC167	5946.07	4589.95	4807.67	4621.38	5994.56	5608.44	4591.9	4350.09	8064.49	6091.81	6013.04	6038.87
gRNA_NT8	na	3254.52	3267.61	3993.22	2615.86	2752.44	2373.71	4284.25	2674.21	4095.22	3224.82	4760.68	4074.87
SMU1_Hela_gRNA1008	SMU1	5382.01	4219.94	5902.65	4832.02	5510.41	5205.49	6125.5	5670.12	7772.62	4837.24	10245.2	5914.08
CCT7_Hela_gRNA945	CCT7	6082.45	4685.18	5268.75	5599.47	4283.67	4006.03	4075.63	4020.55	3367.43	3722.15	3864.91	3070.79
LSM7_Hela_gRNA230	LSM7	3071.23	3954.54	2816.87	3931.1	1465.36	2556.17	1933.5	3017.14	301.674	878.552	727.073	1698.1
RPLP1_Hela_gRNA383	RPLP1	5032.89	6069.97	6790.72	5454.18	4794.08	6076.35	8660.34	5905.05	4659.35	4501.93	5509.1	3312.69
GARS1_Hela_gRNA1341	GARS1	4937.97	3125.54	3636.75	3420.16	1129.08	612.335	578.907	511.857	1058.87	593.499	64.0593	223.662
TMEM50A_Hela_gRNA675	TMEM50A	3455.27	3042.79	3942.07	3462.56	3244.42	3215.08	3545.81	3002.37	4086.17	5128.35	5796.3	4995.44
HMG20B_Hela_gRNA690	HMG20B	4641.21	6664.79	6202.55	5819.83	4410.35	6234.45	7869.84	5216.42	4649.54	8594.04	9715.66	7553.63
CKAP5_Hela_gRNA6131	CKAP5	5207.45	5561.02	5501.23	5739.19	5281.46	7218.54	5892.33	5533.04	4847.14	5732.25	6780.68	5343.89
TRRAP_Hela_gRNA9677	TRRAP	4876.87	3525.21	4312.49	3784.42	5979.36	4339.33	5415.41	4406.86	8050.91	5787.7	7775.73	5902.56
SFPQ_Hela_gRNA1207	SFPQ	4175.34	5556.34	5218.38	5365.89	755.021	531.146	879.787	1006.17	650.106	454.872	360.868	486.681
EPRS1_Hela_gRNA3494	EPRS1	6492.67	4505.64	4756.53	4789.61	3623.55	2559.16	3015.14	3266.84	1628.28	647.217	986.514	944.564
BUD23_Hela_gRNA237	BUD23	4847.41	4536.87	4460.5	5109.38	5928.68	5927.64	6935.46	6125.2	5250.63	6155.93	9739.15	7396.2
GTPBP4_Hela_gRNA1021	GTPBP4	5581.67	4816.32	5625.22	5007.89	3723.97	4343.6	3286.4	3721.92	1702.19	1718.98	1491.51	1808.49
AQR_Hela_gRNA1241	AQR	2079.49	2752.41	2250.4	2685.38	64.0316	103.409	11.849	72.0015	325.807	254.728	65.127	447.324
CDC16_Hela_gRNA800	CDC16	4943.42	4490.03	5124.62	4965.49	3152.75	3158.25	3924.13	3175.91	2032.53	1941.65	2431.05	2373.89
DARS1_Hela_gRNA1531	DARS1	3516.37	3565.8	4262.89	4027.03	2794.82	2673.25	3522.96	3961.47	3880.28	3288.94	4843.95	4988.72
SRRT_Hela_gRNA1235	SRRT	4555.02	4702.36	3419.77	3951.26	6338.67	9550.37	4184.38	5499.81	5829.84	6452.25	3849.97	4474.2
MTREX_Hela_gRNA689	MTREX	6912.72	6069.97	6108	5389.53	7297.3	7310.42	5870.75	6852.14	8283.2	6745.1	5848.62	6719.46
GTPBP4_Hela_gRNA1024	GTPBP4	5050.34	6589.86	7227.78	5718.34	5099.5	8365.02	9673.85	7494.16	5642.05	7910.43	10695.8	6223.18
EFTUD2_Hela_gRNA674	EFTUD2	4274.63	3753.14	4535.67	3966.55	337.203	162.378	448.992	172.157	265.473	440.142	45.9092	429.085
G6PC3_Hela_gRNA1180	G6PC3	6450.12	5231.61	5360.97	4828.54	9743.4	6675.43	7466.13	6851.68	9934.11	7098.6	6374.97	8382.04
MAT2A_Hela_gRNA689	MAT2A	6648.69	7426.66	7390.52	7258.8	1686.01	1672.49	2211.53	1385.57	949.517	519.853	970.499	712.262
LARS1_Hela_gRNA285	LARS1	4643.39	4872.53	5354.77	5235.9	4583.56	5383.25	4781.91	4513.94	4844.88	5678.53	5489.88	4205.42
GMPPB_Hela_gRNA1247	GMPPB	6816.71	3931.12	5185.06	5015.54	6320.71	4210.71	6088.68	4015.93	6884.94	3923.16	5987.41	3813.77
NUP93_Hela_gRNA1517	NUP93	5294.73	2985.03	5070.37	4322.47	1416.99	991.359	1451.92	1311.72	650.861	390.756	244.493	703.623
ITM2C_Hela_gRNA417	ITM2C	8383.42	7421.98	7550.15	7310.94	10078.8	9998.2	8747.09	9940.36	10106.1	9997.65	8876.49	9588.66
MCM3AP_Hela_gRNA2480	MCM3AP	6711.97	5033.33	4279.94	5726.68	9074.07	6010.54	5380.28	7813.55	8026.02	6562.28	6084.57	8655.62
RPLP1_Hela_gRNA381	RPLP1	4647.76	5127.01	5099.05	4861.21	6935.23	7245.47	7101.35	6143.67	5780.82	7678.23	6221.23	5117.35
WBP2_Hela_gRNA584	WBP2	4181.89	4682.06	4682.91	6055.49	6357.1	5828.08	4264.79	6450.6	6593.83	6431.45	5679.93	8769.85
SRRT_Hela_gRNA644	SRRT	7744.08	8535.12	4442.68	6175.75	11444.2	11428	6489.86	8751.87	7805.8	7259.75	5553.94	5383.24
CCDC167_Hela_gRNA83	CCDC167	5323.1	6457.15	4500.02	4712.45	6669.89	8789.76	5015.93	5822.43	4598.26	7563	5036.13	4128.63
PRC1_Hela_gRNA1446	PRC1	4715.4	5739	4180.75	5058.64	3185	4763.22	2730.34	4157.16	3650.25	5821.49	2854.91	3986.56
RNF167_Hela_gRNA945	RNF167	4743.77	4471.3	5116.09	5049.6	6459.36	6550.23	7004.02	7306.77	6704.69	6564.88	7283.55	7717.78
TRAM1_Hela_gRNA745	TRAM1	4321.54	5017.72	5068.05	4074.3	4906.02	4764.93	6311.28	3635.15	7183.6	7729.35	10405.4	4197.74
CCT2_Hela_gRNA591	CCT2	5605.67	6708.51	5897.22	5940.79	8595.9	7614.23	7309.55	5445.34	6616.45	6094.41	6365.36	3806.09
SYPL1_Hela_gRNA292	SYPL1	4025.87	3977.96	4537.22	3940.13	3277.13	3182.18	3112.05	4075.01	6198.64	6025.1	5215.5	6094.55
DDX47_Hela_gRNA201	DDX47	4685.94	6104.32	5388.09	4765.28	4148.7	5414.02	6661.24	4518.09	4205.33	6544.95	6981.4	4075.83
SFT2D1_Hela_gRNA359	SFT2D1	5318.73	5425.2	6082.43	5413.16	5581.81	5594.34	4894.9	6421.98	6435.45	7179.17	5710.89	7074.63
ARPC5L_Hela_gRNA1617	ARPC5L	3642.92	4279.27	2255.82	3498.02	4285.05	3671.87	2812.02	2952.98	5322.27	4724.6	4188.41	4023.99
RPL7_Hela_gRNA678	RPL7	3298.16	4474.42	3191.94	3739.23	658.743	999.905	1112.11	1008.02	445.723	578.77	139.863	214.063
gRNA_NT57	na	6946.54	6472.77	7248.7	5454.18	8600.51	7236.92	8491.06	8120.02	10796.1	7863.65	8625.59	7515.23
PPP3R1_Hela_gRNA862	PPP3R1	5819.51	7724.85	7180.51	6317.56	5878.93	9081.62	8479.22	7752.62	7191.9	9765.44	8687.51	7320.37
RPL17_Hela_gRNA133	RPL17	4630.3	7084.76	6876.74	6334.24	2872.67	5942.17	4118.37	3152.83	1518.17	2858.33	2262.36	1592.51
PSMB3_Hela_gRNA277	PSMB3	5988.62	5450.18	5581.83	6219.54	9740.18	7722.34	8441.55	9269.27	9784.03	9271.58	7507.75	6979.6
RPP21_Hela_gRNA108	RPP21	2947.94	5635.96	5402.82	4536.58	4158.83	5271.29	5272.37	7305.38	3776.95	5169.94	4645.37	6268.29
RPLP0_Hela_gRNA407	RPLP0	3361.44	2263.75	3346.93	2804.95	3601.43	2465.58	3645.68	2515.44	3634.41	2108.01	4249.27	2566.83
TUBA1B_Hela_gRNA1104	TUBA1B	4353.18	3924.88	4501.57	5268.57	4787.17	4970.9	5695.13	7346	5948.25	6152.46	5872.1	6274.05
SF3A3_Hela_gRNA2453	SF3A3	6243.92	4786.66	4334.96	5844.16	3506.54	3330.45	2269.5	3269.14	2257.27	1291.84	1368.73	1479.24
ITM2C_Hela_gRNA583	ITM2C	5721.32	5945.08	5112.99	5198.36	7879.58	6534.85	5624.88	5953.97	9455.96	8298.59	7627.33	6458.36
RPLP2_Hela_gRNA713	RPLP2	7288.03	5475.15	5283.48	4661.01	3264.69	2388.66	3205.57	2436.51	1316.05	1042.31	1520.34	1555.07
PSAP_Hela_gRNA1101	PSAP	2896.66	3882.72	4851.84	4009.65	3218.17	2992.88	4568.21	4122.55	4206.84	5043.44	7504.55	6745.37
TIMM23_Hela_gRNA653	TIMM23	5991.9	6301.03	5849.18	6485.79	6895.15	8315.45	4308.37	5551.5	6834.41	6728.63	3326.81	4823.61
UTP4_Hela_gRNA1603	UTP4	4268.08	4362.01	3952.92	4149.37	6601.71	6701.93	7367.1	4723.02	6844.22	5864.81	7425.54	4119.99
CPSF1_Hela_gRNA713	CPSF1	6020.26	5960.69	6172.32	5957.47	8461.39	8279.98	10529.9	8355.4	8695.74	7168.78	10818.6	7821.45
HNRNPU_Hela_gRNA1141	HNRNPU	5156.17	4045.09	4062.19	5668.98	7062.83	7167.27	4861.04	7326.15	8378.23	6010.37	5765.34	8959.92
TSG101_Hela_gRNA467	TSG101	4872.51	4079.44	4497.7	4118.09	452.828	641.392	1000.39	952.635	365.779	566.64	58.721	1065.51
CPSF1_Hela_gRNA3856	CPSF1	3646.2	3347.23	3370.95	3851.15	3849.27	2501.04	1862.83	2679.75	1676.55	641.152	79.0065	693.064
RPS11_Hela_gRNA226	RPS11	4170.98	4547.8	5275.73	4598.44	4006.81	4570.08	5105.64	3587.61	3083.1	3204.03	3438.92	2440.12
MAT2A_Hela_gRNA718	MAT2A	3492.36	3779.68	2360.44	3251.24	1865.21	2689.06	1603	2182.2	1138.06	2684.18	1599.35	1616.51
SFPQ_Hela_gRNA1206	SFPQ	7099.28	5690.6	7305.27	6583.11	5637.09	3289.86	4415.44	4651.02	3354.61	3889.37	3814.73	3278.13
SLC29A1_Hela_gRNA587	SLC29A1	5954.8	4872.53	4626.34	5891.43	8530.95	8527.39	7827.52	10166.1	7252.99	7128.06	7703.13	8458.84
PSMA6_Hela_gRNA356	PSMA6	4673.94	3365.96	3218.29	5450.7	4683.06	3696.23	3431.55	4321.47	4258.88	2230.17	3350.3	4672.9
RRM1_Hela_gRNA397	RRM1	4601.93	4630.54	4193.93	4284.23	6708.12	4685.45	4065.47	5201.19	8697.25	4772.25	3343.9	4939.76
gRNA_NT85	na	3363.62	2549.45	2941.64	2989.86	4110.92	2724.1	2982.13	3752.85	4754.37	3608.65	4040.01	4418.52
gRNA_NT78	na	4349.91	2616.58	3267.11	3087.18	4306.24	2912.12	3460.33	4663.48	4322.23	2478.83	3580.92	4400.28
MARS1_Hela_gRNA1153	MARS1	4106.61	5184.77	4014.14	3842.81	5497.97	7826.61	5390.44	4450.71	6001.04	9061.91	6938.69	5300.69
ANXA2_Hela_gRNA304	ANXA2	4630.3	3134.9	4692.21	4303	2304.22	1586.17	2513.68	2802.06	2318.36	1843.75	2736.4	2257.74
LDHB_Hela_gRNA380	LDHB	4956.51	4994.3	5205.99	4794.48	3853.88	4207.72	4295.68	3297.3	1371.86	2650.39	3267.03	1992.8
gRNA_NT16	na	4163.34	4243.36	3890.93	4124.35	4569.74	4431.63	3230.54	5574.12	6283.86	6168.93	3155.99	8462.68
MDN1_Hela_gRNA4107	MDN1	3795.67	4508.77	4434.93	5368.67	2461.3	2320.29	2840.37	3016.68	487.957	252.995	542.369	535.637
gRNA_NT3	na	4654.3	5376.8	4467.48	4822.28	6421.59	6713.46	4405.71	5558.42	5860.01	5571.96	4158.52	5804.65
gRNA_NT84	na	7401.5	6444.66	6054.53	6314.78	11008.4	10529.8	9944.26	8730.18	9459.73	10808.6	8926.67	8260.13
YAE1_Hela_gRNA194	YAE1	5527.12	4830.38	5539.21	5944.96	4807.44	4067.56	4624.91	5287.03	5718.98	4485.47	4716.9	5231.58
EIF3D_Hela_gRNA935	EIF3D	4943.42	6652.3	6594.66	5892.82	4332.04	7252.3	5564.37	6673.52	6235.59	8843.57	6558.61	7050.63
CKAP5_Hela_gRNA1892	CKAP5	3928.77	6884.92	6252.14	4708.97	350.562	1100.32	787.957	969.251	501.532	590.034	805.012	383.009
PPP3R1_Hela_gRNA436	PPP3R1	5808.6	5373.68	5493.48	5432.63	7313.89	5171.73	5764.95	5781.35	7067.46	5553.77	6838.33	8702.66
UFD1_Hela_gRNA198	UFD1	6154.46	6610.15	5388.87	5989.45	9234.38	6503.23	5076.87	7361.69	7469.44	7313.47	7028.38	7633.3
gRNA_NT81	na	3656.02	3625.12	5908.85	4417.7	4410.35	4054.32	7251.58	4990.26	6320.06	5161.28	8175.04	5268.05
PSMD2_Hela_gRNA2026	PSMD2	4249.53	5404.9	5560.13	5520.91	1292.61	2329.27	2168.36	2002.66	549.8	1167.07	743.088	655.627
CNPY3_Hela_gRNA1056	CNPY3	4795.04	4185.6	4817.75	4075.69	6887.78	6387.85	7834.72	5458.27	8108.23	6921.85	6397.39	6322.05
TRAM1_Hela_gRNA394	TRAM1	4469.92	4627.42	4384.56	4323.86	3003.96	4203.02	3954.6	3165.76	4308.65	4456.88	5979.94	4656.58
CKAP5_Hela_gRNA3073	CKAP5	4335.72	3977.96	5814.31	5450.7	4835.08	5130.28	5609.22	5829.81	5727.27	6987.7	7423.41	6083.99
RPL10_Hela_gRNA825	RPL10	3750.94	4396.36	4735.6	3999.22	1040.63	1119.98	1085.87	1137.72	340.137	86.6422	90.7507	357.091
gRNA_NT13	na	3401.81	5362.75	4637.96	4870.94	5643.54	6733.12	8470.33	6148.74	4526.61	5615.28	8402.45	6452.6
CCDC167_Hela_gRNA324	CCDC167	5304.55	4663.33	6432.7	4061.79	6680.94	4906.37	8591.78	5183.65	6363.05	5246.19	8670.43	5516.67
HAUS7_Hela_gRNA1057	HAUS7	4768.86	3729.72	4931.66	4648.5	9255.11	4983.71	6725.99	8151.4	7692.67	5946.26	6629.07	9109.66
RPL17_Hela_gRNA246	RPL17	3566.55	2652.49	3377.92	2659.66	362.078	449.957	427.833	593.089	512.845	418.482	143.066	514.518
EFTUD2_Hela_gRNA987	EFTUD2	4300.81	5136.37	5185.84	6646.37	5073.24	5165.75	4533.93	5189.65	5020.6	4772.25	4297.31	5630.9
PPP3R1_Hela_gRNA520	PPP3R1	4453.55	5019.28	4533.35	5891.43	4810.2	5037.98	4567.36	5664.58	5838.14	7625.38	4628.29	7899.2
RPS6_Hela_gRNA147	RPS6	3153.05	4778.86	4857.27	4671.44	1782.29	2986.04	2698.61	2596.67	727.033	791.91	724.938	849.531
U2AF2_Hela_gRNA365	U2AF2	6574.5	5003.67	5985.57	6141.69	8708.76	7190.77	7103.04	7925.24	7365.36	5359.69	6795.63	7679.38
TRAM1_Hela_gRNA550	TRAM1	6978.18	5428.32	5007.6	4409.36	7616.54	5080.29	5516.97	4899.33	8998.92	6449.65	5505.9	6641.7
PRPF8_Hela_gRNA3114	PRPF8	2639.18	3147.39	3975.4	2993.33	33.6281	443.548	293.262	161.08	100.306	401.153	30.962	418.526
SNRPD2_Hela_gRNA758	SNRPD2	6959.63	5546.97	5286.58	6098.59	9967.75	7185.21	7079.34	8150.94	10356.5	7268.42	6403.8	8755.45
gRNA_NT43	na	3179.24	3289.46	5078.12	3128.19	3818.87	3551.37	6527.94	5293.49	3540.89	3625.11	7612.38	4727.62
POLA1_Hela_gRNA4232	POLA1	5396.2	4497.84	5572.53	4054.14	4320.06	2601.46	5313.84	2585.13	3334.25	1888.8	3851.03	1768.18
EIF4A1_Hela_gRNA626	EIF4A1	5418.02	3923.31	5162.59	4989.12	5421.96	3202.69	5226.67	4498.71	8010.94	5562.43	6590.64	7799.37
gRNA_NT7	na	2166.77	3077.14	3619.7	3760.09	1426.2	2880.92	3606.32	3656.38	2164.51	3544.53	3217.91	4483.8
EIF3D_Hela_gRNA1242	EIF3D	4740.49	4919.36	3967.65	4305.78	5671.64	5979.77	5961.31	5895.82	5016.08	6005.17	6747.58	5445.64
TIMM23_Hela_gRNA704	TIMM23	3433.45	4469.74	3620.48	4873.03	5191.63	5426.83	5277.03	5559.81	5430.12	6843	8467.58	6750.17
PSMA2_Hela_gRNA258	PSMA2	3766.21	4132.52	3539.88	4884.85	2114.89	2281.41	1894.14	3229.45	3075.56	3791.46	1635.65	3837.77
VARS1_Hela_gRNA1001	VARS1	4833.23	4377.63	3473.24	3634.27	7318.03	4732.88	4720.55	3493.46	10565.4	6852.53	4365.64	3879.05
CSE1L_Hela_gRNA1747	CSE1L	3858.95	3771.88	3671.62	4169.53	2758.43	3942.79	4048.97	3619.92	1543.06	2347.14	1066.59	1180.7
BUB1B_Hela_gRNA666	BUB1B	3062.5	3995.13	3569.33	4665.87	2180.76	3911.17	2958.01	3191.14	4956.5	6948.71	5432.23	5779.69
RPA1_Hela_gRNA334	RPA1	5394.01	4771.05	3717.34	4645.02	1326.7	1709.67	962.73	1125.25	1147.11	819.635	365.138	610.511
KARS1_Hela_gRNA1259	KARS1	4802.68	4705.48	5477.21	4538.66	3837.75	4515.81	3603.78	3834.54	2649.45	3339.19	2677.68	3857.93
CCT8_Hela_gRNA1032	CCT8	4430.64	4863.16	5340.05	4061.79	3691.26	4076.11	4449.72	4050.08	2340.99	4108.57	2531.41	3353.01
OAZ2_Hela_gRNA522	OAZ2	5121.26	5315.91	6163.03	6063.83	6764.78	5678.95	6965.93	7225.07	7097.62	4463.81	7875.03	6554.35
NUP133_Hela_gRNA1354	NUP133	5424.56	3962.34	5126.17	4645.71	2967.57	3397.54	3762.9	3079.45	2077.78	950.465	1384.75	1335.25
COX7A2L_Hela_gRNA149	COX7A2L	4414.28	4354.21	3370.17	2544.26	3898.1	4519.23	3845.84	1921.89	5703.89	7124.59	5294.5	3732.18
RNF167_Hela_gRNA1285	RNF167	2808.29	4146.57	3860.71	3128.89	2154.04	4232.08	3659.22	2999.6	3990.39	6309.29	5727.97	3814.73
NIFK_Hela_gRNA213	NIFK	5412.56	4934.98	4731.73	3829.6	7575.08	5980.2	6158.08	5756.89	6174.5	7047.48	5390.59	5033.83
TRAP1_Hela_gRNA2109	TRAP1	4641.21	4216.82	5329.2	5118.42	5656.44	6271.63	4918.17	6317.21	6542.54	4729.8	4812.99	6609.07
gRNA_NT60	na	4642.3	4505.64	3534.46	4500.43	4734.2	4217.98	3036.3	4943.64	7130.05	5046.04	4538.6	6220.3
DDX27_Hela_gRNA677	DDX27	5790.06	6511.8	7183.61	6760.37	7365.48	6955.32	7880.42	6865.07	2974.5	3023.81	4448.92	3191.74
PRC1_Hela_gRNA1801	PRC1	3215.24	3828.08	3404.27	4692.99	2734.93	3100.56	3105.7	4429.02	3022.77	4297.45	3476.29	5524.35
POLA1_Hela_gRNA746	POLA1	4661.94	5289.37	3857.61	4939.07	5378.2	7222.82	4219.93	5259.34	5118.65	6572.68	3594.8	5009.83
LARS1_Hela_gRNA1585	LARS1	5402.74	6262	6080.11	6145.16	2172.47	1675.05	2116.74	1594.65	751.167	174.151	167.622	138.229
COPG1_Hela_gRNA1168	COPG1	5523.85	5384.6	5197.46	5220.61	7714.66	6485.71	8460.6	6536.91	5383.36	6701.78	7359.35	6002.39
COPB1_Hela_gRNA1033	COPB1	6282.11	5364.31	6709.35	6589.37	1911.74	1302.01	3146.33	2581.44	708.179	915.808	2268.77	1210.46
EMP3_Hela_gRNA335	EMP3	3881.86	5083.29	4540.32	4149.37	4238.99	4809.37	4467.07	3344.84	4961.77	6040.7	5912.68	4011.52
IARS1_Hela_gRNA1173	IARS1	4326.99	3390.94	3647.6	3170.6	4872.85	3766.74	3563.16	3262.68	4804.15	4690.81	2958.47	3769.62
MTREX_Hela_gRNA1156	MTREX	4128.43	3572.04	3721.99	2733.35	1154.41	608.489	648.309	229.851	245.864	339.638	91.8184	104.632
MLEC_Hela_gRNA745	MLEC	5251.09	3860.87	3867.68	3791.37	6117.09	6386.57	4437.87	4994.87	8160.27	6977.3	5022.25	4206.38
gRNA_NT25	na	3102.87	2541.65	3047.03	3130.97	3876.91	4382.92	4292.72	4392.09	4013.77	4805.18	3574.51	4225.58
LDHB_Hela_gRNA934	LDHB	5168.17	5520.43	5202.89	4499.04	2821.08	1894.69	2009.25	1530.03	2181.85	1350.75	879.748	613.39
LDHB_Hela_gRNA707	LDHB	3610.19	3362.84	4810.77	3254.02	2948.68	3274.48	4606.29	2483.59	2557.44	3176.3	5518.71	2249.1
RNF167_Hela_gRNA1310	RNF167	4485.19	4680.5	3463.17	3543.9	5010.59	5439.65	4026.96	3970.7	5924.11	6476.51	3464.54	4406.04
SYPL1_Hela_gRNA658	SYPL1	5763.87	7810.72	5575.63	6826.41	5863.73	9446.97	5515.7	9686.97	6746.17	10760.1	6353.62	12915.8
OAZ2_Hela_gRNA532	OAZ2	3788.03	4243.36	3800.26	3390.27	3479.82	3086.46	2711.3	3296.38	5304.93	4942.94	4837.55	5417.8
gRNA_NT1	na	4511.38	4575.9	4290.02	4447.6	4701.49	4373.94	3255.51	5347.03	5979.92	6174.99	4597.32	6470.84
TRAP1_Hela_gRNA415	TRAP1	3374.53	3531.45	3591.8	2447.64	3839.59	4168.41	2947.86	1783.88	6730.34	4256.73	2578.39	2469.88
TRAP1_Hela_gRNA1385	TRAP1	4064.06	3228.58	4130.38	3187.28	4048.27	1810.51	4472.99	2872.68	4123.12	2843.6	5619.07	3579.55
gRNA_NT17	na	2602.09	2939.75	3252.38	2865.43	3416.71	4330.79	4773.45	3175.91	2963.19	5243.59	6339.74	3321.33
HADHB_Hela_gRNA344	HADHB	3489.09	2913.21	2952.49	2638.8	3511.14	2544.63	3517.03	3004.68	2902.1	3660.63	4162.79	2888.41
RPA1_Hela_gRNA830	RPA1	6147.91	5237.85	6579.16	5633.53	5193.93	4694.43	7601.97	6911.22	4316.95	4370.23	7435.15	5943.84
CPSF1_Hela_gRNA1150	CPSF1	2860.66	3108.36	3452.32	3075.36	1513.27	2252.78	2273.73	852.941	287.344	695.737	69.3976	301.416
DDX47_Hela_gRNA863	DDX47	6661.78	4732.02	5870.88	5545.24	9128.42	5322.14	6175.86	6659.22	9309.64	5552.03	6802.03	7456.68
COPB1_Hela_gRNA1034	COPB1	5278.37	5787.4	6510.97	4686.73	5507.64	6181.89	5618.11	4727.18	9020.04	6138.6	7702.07	5290.13
VCP_Hela_gRNA2241	VCP	4469.92	5868.58	3986.24	5831.65	3850.19	5254.2	3153.1	5383.04	2770.12	4867.56	2897.62	3400.05
MTREX_Hela_gRNA757	MTREX	4004.05	3398.75	3587.15	3933.88	3972.26	4600.84	3828.91	3549.3	2305.54	1258.91	1628.17	1325.65
EFTUD2_Hela_gRNA417	EFTUD2	4887.78	4802.27	4380.68	4193.17	872.028	887.523	1274.61	1520.8	309.215	136.028	798.606	198.704
YARS1_Hela_gRNA1549	YARS1	2538.81	3237.94	3973.85	2159.15	2282.11	2575.4	2892.42	1094.79	2512.19	3012.55	4597.32	1703.86
gRNA_NT52	na	2674.1	3056.84	3425.19	3114.99	4007.74	4698.27	2594.08	3358.69	4494.18	5838.82	3073.78	3678.42
SLC35B1_Hela_gRNA962	SLC35B1	5311.1	4407.29	3870	6280.72	6786.43	4854.24	3149.29	5497.04	2182.61	2629.59	1383.68	2116.63
TIMM23_Hela_gRNA798	TIMM23	4309.54	3456.51	5378.02	3653.03	3928.96	2789.05	4338.42	2394.97	6442.99	3868.58	8318.1	4727.62
TMEM50A_Hela_gRNA578	TMEM50A	6203.55	4838.18	5505.88	5348.52	7262.75	4154.73	6440.77	4926.56	7422.68	5484.45	7670.04	7262.77
OAZ2_Hela_gRNA274	OAZ2	6623.6	6619.52	4764.27	5444.45	9611.66	8991.45	8191.88	7663.54	10204.1	9070.57	6980.33	6613.87
RPLP0_Hela_gRNA408	RPLP0	3453.09	3272.29	4127.28	3315.88	1065.5	806.761	1327.51	884.326	283.573	240.865	29.8944	119.03
NUP133_Hela_gRNA557	NUP133	3833.85	4888.14	4673.61	5320.71	3625.39	4667.93	4866.97	4616.87	4629.18	4282.72	6362.16	6469.88
TSG101_Hela_gRNA1395	TSG101	4109.88	3910.82	3003.63	4118.79	2979.54	2868.96	2388.42	3737.15	4973.84	4319.11	3331.08	5800.81
ELOB_Hela_gRNA178	ELOB	4367.36	5760.86	4107.13	4601.92	5135.89	5155.92	3501.37	4752.1	2972.99	6026.83	2960.61	3460.52
PSMD1_Hela_gRNA2815	PSMD1	3986.6	4477.54	4663.53	4230.71	1431.73	2076.73	2137.47	1484.8	532.454	1002.45	1399.7	1296.86
SRRT_Hela_gRNA2411	SRRT	4553.93	5095.78	4325.66	4438.56	4370.27	5745.61	3908.05	4547.63	6334.39	7798.67	4534.33	5593.47
SARS1_Hela_gRNA1586	SARS1	5443.11	4889.7	4765.82	5468.78	5960.01	6013.1	5982.89	6158.9	5272.5	6620.33	7041.19	5095.27
PRELID3B_Hela_gRNA645	PRELID3B	5754.05	6110.57	6126.6	5623.8	7458.07	6874.13	7217.3	6409.98	8841.3	6660.19	8550.85	6227.98
TUBA1B_Hela_gRNA386	TUBA1B	3865.49	4833.5	4595.34	3602.29	3412.56	3534.28	4095.52	3264.07	2113.22	2380.06	2145.99	2192.46
SARS1_Hela_gRNA194	SARS1	4209.16	4725.77	5399.72	6575.46	4915.69	3775.71	5981.2	6712.29	6179.78	3848.65	7068.95	6900.88
gRNA_NT71	na	3130.14	3155.2	4517.85	2590.14	3858.48	2633.51	4537.74	2069.58	5052.28	5289.51	7344.4	3893.45
gRNA_NT90	na	4476.47	4671.13	3314.38	4979.39	5427.95	6312.65	4400.2	7592.93	4975.35	6576.14	4094.46	5832.49
SLC35B1_Hela_gRNA1141	SLC35B1	5512.94	2768.02	4188.5	3963.07	4949.78	2785.21	4356.62	2790.52	5522.89	3865.11	5001.97	4389.72
SBNO1_Hela_gRNA510	SBNO1	6022.44	5381.48	6383.11	6948.07	6959.64	6807.47	8203.73	8601.87	6281.6	3217.03	5157.84	3097.67
TERF2_Hela_gRNA575	TERF2	5320.92	5667.18	3946.72	4652.67	5327.52	5985.76	5273.64	5119.03	7174.55	5626.55	5173.86	6939.28
TMEM50A_Hela_gRNA630	TMEM50A	2767.92	3262.92	3723.54	3559.19	1797.95	2566.85	2974.52	2538.51	4387.09	3717.82	6414.47	4326.37
RPA1_Hela_gRNA266	RPA1	3514.18	4146.57	2586.72	2788.96	3944.63	3850.92	2689.3	2643.29	3477.54	2990.02	3983.42	3046.79
ELOC_Hela_gRNA245	ELOC	7195.29	6415	5407.47	6368.31	7016.76	4500	3640.18	4952.41	5955.79	3665.83	2338.17	3747.54
XPO1_Hela_gRNA3397	XPO1	6166.46	5283.13	5575.63	6066.61	3639.67	3088.6	4996.46	3944.85	4018.29	2964.9	5256.07	3831.05
COPG1_Hela_gRNA403	COPG1	5093.98	5704.65	5123.84	3942.22	5785.42	7224.53	6190.67	4665.33	5990.48	8723.14	7114.86	5098.15
gRNA_NT51	na	5175.81	5384.6	5252.48	4984.95	6270.49	6626.29	4961.76	5315.19	6795.2	8190.29	6390.99	5526.27
BUD23_Hela_gRNA223	BUD23	4515.74	7567.17	6739.57	6753.42	3958.44	6490.41	6326.51	5701.96	6197.88	11465.4	10100	7270.45
TUBA1B_Hela_gRNA703	TUBA1B	2406.8	3225.45	2862.59	3283.21	383.729	385.433	113.835	398.316	446.477	77.978	81.1418	140.149
YJU2_Hela_gRNA201	YJU2	5048.16	3376.89	3499.59	2892.54	4033.07	2652.31	2265.27	1962.5	7016.93	4507.13	3435.72	2800.09
RPL17_Hela_gRNA243	RPL17	3671.29	3536.13	3495.71	3942.91	1802.1	2192.1	2528.91	2080.2	852.228	694.871	443.077	490.52
DYNC1H1_Hela_gRNA10775	DYNC1H1	4301.9	5609.42	6789.94	5580.7	1603.09	3001	4288.48	2961.29	547.537	1277.97	980.108	709.383
EIF1AX_Hela_gRNA291	EIF1AX	6889.81	5941.96	5725.96	5144.14	8251.33	7246.75	7293.47	4153.93	10480.1	8616.57	7430.88	6231.82
CIAO2B_Hela_gRNA389	CIAO2B	2682.82	3063.09	3463.17	3048.95	4542.1	4951.24	4409.94	4093.47	3597.46	4372.83	5279.56	3615.07
SPOUT1_Hela_gRNA1066	SPOUT1	7117.83	4568.09	4424.08	6405.15	9409.43	8577.39	6106.03	8971.57	9431.82	6903.65	5787.76	9112.54
VARS1_Hela_gRNA945	VARS1	6174.1	6973.91	6927.88	7267.14	5618.2	6632.7	7240.57	7435.08	1509.12	1589.02	1595.08	1707.7
NUP133_Hela_gRNA2954	NUP133	2307.51	3670.4	3598.78	3235.25	1286.62	1658.82	1839.13	1755.27	539.241	707.867	633.12	489.56
YAE1_Hela_gRNA196	YAE1	4635.75	4212.14	4531.8	4898.06	5702.5	4560.68	4925.79	5617.04	6991.28	6477.37	6273.54	6154.06
CWC22_Hela_gRNA2064	CWC22	6161	5429.88	6113.43	4457.33	5854.98	4777.32	5993.47	3497.15	6641.34	5184.67	7999.94	6698.34
EFTUD2_Hela_gRNA611	EFTUD2	7344.76	5748.37	7003.05	6525.41	7472.35	5960.97	7434.39	7321.54	8286.97	6814.41	8381.1	10175.2
DARS1_Hela_gRNA1524	DARS1	5298	4763.24	4674.38	5855.28	4423.71	3674.86	4015.54	4885.95	3754.33	3895.43	4698.75	5355.41
TCP1_Hela_gRNA1835	TCP1	3435.63	3450.27	4268.32	4652.67	2141.14	1516.1	1516.67	2550.98	265.473	411.551	526.354	463.643
LSM7_Hela_gRNA82	LSM7	4339	4093.49	4143.56	4453.16	4509.85	3947.06	3335.07	4748.41	6704.69	4683.01	6266.07	6182.86
ARPC5L_Hela_gRNA1602	ARPC5L	3382.17	2463.59	2673.51	3688.49	3726.27	1912.64	3071	3372.99	4714.4	3059.34	4663.52	4272.61
WARS1_Hela_gRNA1621	WARS1	4701.22	4874.09	4890.59	4697.16	5367.14	4494.02	6102.23	5196.11	6977.71	7076.07	8572.21	5622.27
HMG20B_Hela_gRNA749	HMG20B	4489.56	4910	5109.89	3979.06	7306.52	7623.63	8806.76	5576.42	6157.16	7020.62	7144.75	5338.13
TCP1_Hela_gRNA1460	TCP1	3402.9	3451.83	4033.52	3903.99	2828.45	2714.7	2975.79	3307.92	4099.74	2218.91	3255.28	3952
NARS1_Hela_gRNA1240	NARS1	4101.15	3387.82	4023.44	3954.04	2660.77	2294.23	3156.48	2763.75	4548.48	5442	4593.05	3160.06
XPO1_Hela_gRNA1890	XPO1	6744.7	6888.05	5301.3	6986.99	5105.49	4384.2	2660.94	3896.39	1029.46	1184.4	1119.97	1781.62
HADHB_Hela_gRNA349	HADHB	2927.21	3409.68	2942.41	3255.41	4054.72	4716.65	2889.88	3755.62	3597.46	4466.41	2853.84	3692.82
RACK1_Hela_gRNA574	RACK1	3542.55	3854.62	4660.43	3624.53	432.559	193.571	241.635	429.24	128.965	2.59927	97.1566	407.007
TUBA1B_Hela_gRNA231	TUBA1B	4849.59	4474.42	5766.26	6268.2	2308.82	2398.06	2183.17	3437.15	702.145	1005.05	726.006	1191.26
ARPC5L_Hela_gRNA1322	ARPC5L	5394.01	5701.53	6009.59	6461.46	8310.29	7157.44	7661.21	9848.51	8289.99	6822.21	6954.71	8905.2
SMU1_Hela_gRNA848	SMU1	3457.45	5439.25	5285.8	5784.38	1019.9	1594.72	1831.94	1486.18	874.099	1265.84	449.483	1034.8
NUP93_Hela_gRNA2024	NUP93	5755.14	6469.64	7392.07	8174.32	7712.36	7815.5	9881.63	9045.88	8554.71	8009.21	12473.4	9824.81
RPL10_Hela_gRNA617	RPL10	4341.18	4958.39	3928.9	4328.72	1968.86	1697.7	949.611	1062.48	414.801	473.933	333.108	218.862
CKAP5_Hela_gRNA6087	CKAP5	5044.89	4961.52	4072.26	4986.34	4422.79	3903.05	3848.38	4176.55	7868.4	4836.37	3888.4	4695.94
KPNB1_Hela_gRNA702	KPNB1	5636.22	4710.16	4987.45	4829.93	5369.44	4251.73	6146.24	3928.24	9290.79	5638.68	8727.02	6137.74
HYOU1_Hela_gRNA369	HYOU1	6082.45	6436.86	5975.49	5973.46	8404.27	7231.79	8069.16	5129.65	8890.32	7419.17	8960.83	5451.4
MCM3AP_Hela_gRNA1439	MCM3AP	4934.69	5166.04	5639.17	4507.38	5157.08	6107.11	6018.86	4200.09	4381.81	6482.57	7682.85	6804.89
PSMA2_Hela_gRNA361	PSMA2	4379.36	4975.57	3901	4103.49	4094.8	4503.42	3115.44	3346.69	6130.76	5577.16	3086.59	3225.34
PSMB3_Hela_gRNA155	PSMB3	3938.59	3361.28	3722.77	3506.36	5962.31	3410.79	4518.69	4904.41	6887.96	3689.23	3795.52	4244.78
PPP3R1_Hela_gRNA435	PPP3R1	6558.14	5743.68	4734.83	5742.67	7933.01	6577.58	5472.54	5660.89	8408.39	6679.25	6251.12	8461.72
TCP1_Hela_gRNA1921	TCP1	5733.32	4856.92	5374.92	4560.91	3804.12	4229.94	3880.54	3138.07	2258.03	2177.32	2081.93	1226.78
NEDD8_Hela_gRNA254	NEDD8	5642.77	6297.91	4651.91	5805.93	7382.06	9429.87	6350.21	7045.07	8722.14	8780.32	7708.47	9130.78
RAN_Hela_gRNA574	RAN	5136.53	6004.4	6703.93	5270.66	4662.79	6546.81	5720.1	4291.01	7029.75	7783.94	7241.91	5248.86
STK25_Hela_gRNA996	STK25	4689.21	4707.04	4776.67	4704.11	5977.98	4970.04	6304.5	4081.01	7198.68	5462.79	6808.44	5268.05
CNOT3_Hela_gRNA2187	CNOT3	5401.65	5957.57	5627.55	7220.57	6300.44	6778.42	7234.23	9236.5	7691.92	7379.32	9501.07	9968.79
RPP21_Hela_gRNA379	RPP21	4204.8	3053.72	5378.8	4878.59	4073.61	2892.03	4816.61	3707.15	5232.53	4315.65	7402.06	5497.48
U2AF2_Hela_gRNA361	U2AF2	4596.48	6792.81	5899.55	6001.27	6591.57	10532.3	7815.67	7895.7	5462.55	9836.49	6828.72	7569.95
LSM8_Hela_gRNA391	LSM8	3310.16	4821.01	4121.86	4482.35	3451.26	3336.01	4557.63	3489.76	2914.17	3708.29	4100.86	2688.74
PAM16_Hela_gRNA175	PAM16	6229.74	7592.15	6559.01	6002.66	7456.23	11604	9025.11	8050.78	6848.74	9240.39	8950.16	7289.65
gRNA_NT27	na	4241.9	5269.08	3608.08	4603.31	6350.19	6582.28	5806.85	5679.35	4956.5	5187.27	6181.72	6281.73
CCT7_Hela_gRNA241	CCT7	3070.14	2574.43	2856.4	2433.04	2265.06	2170.73	3124.75	2011.43	1191.61	2325.48	1201.11	935.924
NUP93_Hela_gRNA812	NUP93	5929.71	4218.38	4330.31	4774.32	4864.1	3994.06	4233.05	5279.19	3109.5	2241.43	2332.83	4019.19
ARCN1_Hela_gRNA247	ARCN1	4152.43	4796.03	3456.97	4305.78	127.603	112.382	193.392	45.2317	126.703	247.797	115.307	294.696
WARS1_Hela_gRNA1331	WARS1	5379.83	4775.73	4335.74	4157.02	4261.1	4740.58	2900.46	3876.54	4651.81	5207.2	2637.11	4608.59
MAT2A_Hela_gRNA1044	MAT2A	4174.25	3904.58	4589.92	4285.62	3048.64	3336.86	4476.8	2910.98	1560.41	1543.96	3177.34	2340.29
gRNA_NT34	na	2411.16	2099.82	2558.82	2275.93	2259.07	1943.41	2284.74	2246.82	3580.11	2808.07	3385.54	4092.15
MDN1_Hela_gRNA5656	MDN1	3748.75	3598.58	3288.03	3839.34	1235.03	1327.65	1258.95	1180.18	591.28	175.017	52.3151	258.219
AARS1_Hela_gRNA2649	AARS1	4432.82	5927.9	4469.03	4718.71	4766.44	5730.65	4793.76	5877.81	4145.75	6527.62	6447.57	4717.06
XPO1_Hela_gRNA1398	XPO1	3606.92	4134.08	2592.92	4214.72	1217.06	835.818	663.12	1050.48	389.159	174.151	132.389	161.267
CKB_Hela_gRNA567	CKB	4337.91	4699.23	4077.69	4312.74	7845.49	7828.32	4954.57	5500.27	7176.81	6373.4	5582.77	4173.74
WDR75_Hela_gRNA525	WDR75	6931.27	6563.32	5133.14	4674.91	3798.14	3563.76	2785.36	2099.58	676.503	227.869	191.11	359.011
RNF167_Hela_gRNA1323	RNF167	3187.97	5028.65	5439.24	4191.08	3458.17	4181.23	4515.73	3944.39	3040.87	4730.67	5664.98	4820.73
gRNA_NT38	na	4924.88	4426.02	4502.35	3682.93	7079.41	3874.42	4712.09	5388.57	5715.2	4640.56	5680.99	4760.26
SYPL1_Hela_gRNA659	SYPL1	5205.27	4608.68	6135.13	5406.91	6510.5	4704.68	7728.92	5275.96	8691.21	6497.3	7492.81	6787.61
RPP21_Hela_gRNA126	RPP21	5683.14	7173.75	6799.24	7693.27	7420.3	7782.59	8536.77	10374.7	8958.95	7421.77	11356.7	10068.6
DYNC1H1_Hela_gRNA734	DYNC1H1	4697.94	4755.44	4628.66	4889.71	4400.68	3018.94	2119.27	3162.07	2397.55	1072.63	1228.87	1266.14
LSM7_Hela_gRNA108	LSM7	4200.44	4959.96	4051.34	4722.88	4291.5	6988.22	4727.74	6802.3	4571.86	7731.09	4535.4	7154.3
SNU13_Hela_gRNA660	SNU13	5177.99	6066.85	6120.4	5191.41	6146.12	5380.26	7039.99	5340.11	5995.01	7049.21	11261.6	7535.39
PSMD1_Hela_gRNA1150	PSMD1	3187.97	3414.36	3236.11	3014.88	308.181	510.635	494.272	258.005	532.454	94.44	169.757	386.849
SF3A3_Hela_gRNA2300	SF3A3	4760.13	6094.95	3965.32	5493.8	2764.42	3215.93	2730.34	2719.44	2347.02	2595.8	1515	2807.77
ELOC_Hela_gRNA471	ELOC	4627.03	4554.04	4582.94	4902.92	5395.24	5918.24	4877.13	5343.8	6196.37	6968.63	5179.2	6683.94
PSMD1_Hela_gRNA1832	PSMD1	3565.46	5159.79	5401.27	6031.16	547.263	1179.8	1327.93	1282.64	786.614	1362.88	182.569	1097.19
SNU13_Hela_gRNA676	SNU13	6020.26	5225.36	7757.83	6055.49	5653.67	3951.33	8131.36	7111.53	6907.57	5651.67	10476.9	9389.96
RRM1_Hela_gRNA1334	RRM1	3923.32	5265.95	4391.53	3779.55	3401.97	5375.98	3878.43	4055.62	4802.64	5402.14	4742.53	4655.62
EIF1AX_Hela_gRNA489	EIF1AX	4510.29	5311.23	4493.05	3950.56	4891.74	5552.46	6125.92	4434.55	4413.48	7381.92	6874.63	4828.41
EPRS1_Hela_gRNA3493	EPRS1	3801.12	5984.11	3819.63	5093.39	3509.76	4979.01	4096.36	4768.71	3405.89	4523.59	3075.92	4450.2
RPS6_Hela_gRNA281	RPS6	3515.27	3345.67	5101.37	4191.08	396.167	405.944	630.535	454.163	515.862	332.706	119.577	276.458
gRNA_NT79	na	4983.79	4683.62	3946.72	5306.11	8379.39	5769.54	5316.81	7604	8351.08	6499.03	6287.42	5996.64
EMP3_Hela_gRNA573	EMP3	4748.13	5420.51	4849.52	4924.47	4994.01	4493.59	5748.03	4751.18	8610.52	5298.17	10300.7	5652.02
NEDD8_Hela_gRNA306	NEDD8	4054.24	4148.13	5391.97	5263.01	4388.7	4586.74	5539.82	5026.26	2579.31	2420.78	2373.4	2357.57
VARS1_Hela_gRNA2129	VARS1	5894.79	5632.84	6685.33	5614.76	8494.56	6813.03	7783.09	7250.92	7624.04	6962.57	10631.7	8939.76
SBNO1_Hela_gRNA2325	SBNO1	4954.33	4324.54	4985.13	5173.34	5521.46	4129.95	5452.65	3578.38	7016.93	3586.12	7507.75	4950.32
GMPPB_Hela_gRNA548	GMPPB	4196.07	5206.63	5701.94	6365.53	5484.15	7493.31	8220.23	8782.8	5053.79	7687.76	9593.95	8631.62
COPG1_Hela_gRNA1098	COPG1	2162.41	2262.19	1945.85	3200.49	2652.48	1593.44	1137.93	2256.97	4132.93	2989.16	1200.04	3453.8
TIMM23_Hela_gRNA532	TIMM23	4877.96	4803.84	4372.16	5773.25	4499.72	3082.61	3374.84	4600.71	1215.74	584.835	1095.41	1438.92
PPP3R1_Hela_gRNA901	PPP3R1	4631.39	5525.11	5601.98	6277.94	2336	3756.48	4693.89	4405.01	3168.33	3242.15	3327.88	3715.86
U2AF2_Hela_gRNA1254	U2AF2	6757.79	6900.54	6929.43	7602.9	6834.8	8012.91	5199.16	8380.79	6525.2	7444.3	4786.3	8405.08
HYOU1_Hela_gRNA1555	HYOU1	5594.76	3942.05	4972.73	5915.07	6588.81	4122.26	5404.4	6266.9	7388.74	4687.34	7704.2	7204.22
MLEC_Hela_gRNA732	MLEC	3760.75	4171.55	5447.76	4562.99	1706.74	2019.89	2594.5	2133.74	838.652	565.774	1301.47	446.364
GARS1_Hela_gRNA1342	GARS1	4213.53	4577.46	3573.21	3671.8	999.17	962.302	748.179	966.02	601.839	471.334	234.884	838.972
BUB1B_Hela_gRNA2803	BUB1B	3253.43	3203.6	4865.02	4424.66	2813.25	3577.01	5090.41	5472.11	3792.04	5000.12	7214.15	6684.9
MCM3AP_Hela_gRNA178	MCM3AP	4646.66	5714.02	4766.6	4603.31	4393.31	6516.05	6344.28	4798.72	5396.94	7596.79	7120.19	5680.82
TSG101_Hela_gRNA573	TSG101	5196.54	4502.52	4251.27	6068.7	5833.79	6790.38	4605.45	6797.68	6648.13	9150.28	6684.59	7161.02
TERF2_Hela_gRNA1586	TERF2	5771.51	3394.06	3887.05	4762.5	5963.69	2917.67	5139.5	5035.49	7966.44	3450.09	6273.54	5031.91
PSMA2_Hela_gRNA696	PSMA2	5562.03	5095.78	6275.39	6635.25	2645.11	4049.19	4027.38	5261.19	4023.57	4025.4	3750.67	3987.52
AARS1_Hela_gRNA2513	AARS1	5311.1	3300.39	4958.01	5603.64	7414.77	2737.35	3035.46	4428.09	7064.44	3673.63	5705.55	5750.89
CFAP298_Hela_gRNA1178	CFAP298	3874.22	4710.16	5100.59	4925.17	5534.82	4870.05	7410.27	6401.21	7068.21	6956.5	8703.53	7820.49
SFPQ_Hela_gRNA1204	SFPQ	4321.54	5664.06	4939.41	4446.9	1424.82	615.753	1164.16	1133.1	874.853	236.533	108.901	922.485
YARS1_Hela_gRNA1027	YARS1	3936.41	4892.82	4192.38	4966.18	6021.74	5206.34	4788.68	5670.58	6142.83	4956.8	3763.49	6217.42
SARS1_Hela_gRNA349	SARS1	5427.84	4137.2	4360.54	4263.38	5595.17	4346.17	5010	4059.78	5163.9	4741.06	5045.74	3414.44
CDC5L_Hela_gRNA1839	CDC5L	5832.61	5673.43	4084.66	6323.12	2762.57	4113.71	3028.68	5173.49	1225.55	1901.8	1005.73	2571.63
NUP93_Hela_gRNA2173	NUP93	4513.56	5607.86	7381.99	6459.37	4587.24	4678.19	8472.02	7733.7	5267.97	5096.3	8292.48	8209.26
SNU13_Hela_gRNA391	SNU13	5559.85	5212.87	7133.24	4307.17	5556.93	4686.73	6283.35	4270.24	7178.32	4682.15	9776.52	4332.13
OAZ2_Hela_gRNA593	OAZ2	3920.04	4872.53	4678.26	3576.57	3796.29	5684.93	4021.04	4572.56	4897.67	7340.33	5574.23	5592.51
COPA_Hela_gRNA3211	COPA	6423.94	5300.3	6380.01	5704.43	8685.73	6591.25	7610.01	7292.92	8359.37	8861.77	8484.66	8017.27
CFAP298_Hela_gRNA869	CFAP298	5640.59	5826.43	6055.31	6276.55	8461.39	8106.49	9795.72	7562.47	6344.19	7320.4	10378.7	7132.22
RPL10_Hela_gRNA622	RPL10	5829.33	5754.61	5390.42	5334.61	4266.63	3230.03	2863.22	3424.69	1526.47	1613.28	1071.93	1457.16
IARS1_Hela_gRNA900	IARS1	3178.15	6335.38	5185.84	4964.1	2991.52	4951.24	3723.54	4195.01	4081.64	8412.09	5164.25	5092.39
LARS1_Hela_gRNA1285	LARS1	4176.43	5356.5	5131.59	5018.32	2701.77	2048.1	2317.32	3066.99	2361.35	1229.45	722.803	2186.7
PDLIM1_Hela_gRNA475	PDLIM1	4896.51	4262.1	4906.09	4056.92	5969.22	5160.62	9050.51	4811.18	6493.52	4914.35	10765.2	5174.94
ARPC5L_Hela_gRNA1619	ARPC5L	4097.88	5212.87	4753.43	4990.51	5701.58	6500.66	5605.84	6057.36	9971.82	7903.5	8720.61	5981.28
LSM8_Hela_gRNA389	LSM8	3617.83	4171.55	2212.43	3045.47	2817.39	3034.33	2177.67	2541.28	1380.91	1421.8	1715.72	1618.43
PSMD1_Hela_gRNA1484	PSMD1	2355.52	2999.08	2622.37	2967.61	180.578	190.153	96.4846	156.003	346.925	686.206	62.9917	488.6
gRNA_NT72	na	4290.99	3105.24	3874.65	4933.51	8055.55	4359.84	6051.02	7315.08	6764.27	2604.47	4218.31	6016.79
CCT7_Hela_gRNA866	CCT7	4416.46	3820.27	4250.5	4410.75	626.497	503.798	710.516	558.012	125.949	270.324	76.8712	264.939
gRNA_NT12	na	4014.96	4410.41	4358.21	3856.71	5394.78	4321.38	5550.82	4268.86	6044.03	4149.3	4372.05	5217.18
G6PC3_Hela_gRNA762	G6PC3	4499.38	5612.54	5219.16	4626.95	7742.76	7114.71	8006.53	6697.52	6524.44	6268.56	6910.93	4479
HNRNPU_Hela_gRNA1257	HNRNPU	3230.52	4934.98	3509.66	4727.74	1313.34	2901.43	2029.14	2064.97	1729.34	3421.5	2480.16	1756.66
SRRT_Hela_gRNA1223	SRRT	6899.63	5851.41	6033.61	6421.14	7037.49	7237.77	7716.65	7250.46	7752.25	5292.97	8066.14	6107.99
CKB_Hela_gRNA1316	CKB	4280.08	4193.4	4589.92	5750.31	7127.32	6845.08	8148.29	8876.03	4421.03	5772.1	6304.51	6415.16
PDLIM1_Hela_gRNA996	PDLIM1	4910.69	4319.86	4073.04	3144.18	5639.39	4564.95	4861.89	3709.92	6234.84	7425.24	7040.12	4954.16
BOP1_Hela_gRNA1976	BOP1	5900.25	3952.98	5422.97	4291.19	7751.97	5449.91	6099.69	4828.25	6424.89	4550.45	3017.19	3370.29
RPLP2_Hela_gRNA548	RPLP2	2704.64	2885.11	2591.37	3491.06	348.258	281.17	162.923	468.933	369.55	15.5956	70.4653	287.017
MDN1_Hela_gRNA712	MDN1	5852.24	5340.89	4929.34	5701.65	4233	3792.37	3825.95	4525.02	5628.47	4844.17	4116.88	6703.14
SFT2D1_Hela_gRNA474	SFT2D1	7218.2	6833.4	6064.61	8433.61	6445.54	5659.29	4816.19	9134.04	7269.58	6823.94	4964.6	7560.35
PSMB3_Hela_gRNA402	PSMB3	3557.82	3136.47	2379.81	2686.77	3775.56	3800.07	2032.1	2744.36	5372.81	3436.23	1603.62	2989.2
PRC1_Hela_gRNA1799	PRC1	4419.73	4098.17	4362.09	4736.08	5023.03	4866.63	5278.72	4789.95	6058.36	4939.47	6405.93	5714.42
RPL7_Hela_gRNA570	RPL7	3401.81	2725.87	3574.76	3688.49	377.28	606.78	457.878	422.778	949.517	144.693	3.20297	136.309
DCTN2_Hela_gRNA1190	DCTN2	3265.43	3550.19	4713.9	3505.66	2910.45	4150.89	5015.5	3491.61	2669.81	4656.15	7680.71	4899.44
YAE1_Hela_gRNA655	YAE1	4931.42	3709.43	4651.13	3094.13	4197.53	3078.34	3355.38	2962.68	6814.8	3811.39	3081.25	4191.98
gRNA_NT49	na	3815.31	5376.8	3365.52	4449.68	5622.81	5645.19	4552.97	4325.63	8943.11	6268.56	6216.96	5494.6
RPL30_Hela_gRNA321	RPL30	2504.99	3289.46	3630.55	4471.23	165.377	491.406	289.877	398.316	196.088	269.457	120.645	283.177
PSMD2_Hela_gRNA2056	PSMD2	4985.97	6430.61	5784.08	4746.51	2291.78	4164.56	3017.26	1963.43	1916.38	1104.69	1542.76	706.503
HMGB2_Hela_gRNA1025	HMGB2	5234.73	4020.11	4128.06	3809.44	7589.82	4120.55	5285.92	4182.09	7964.18	5042.58	5604.12	3789.77
gRNA_NT95	na	4381.55	3534.57	5242.41	3824.74	5300.35	3841.09	6393.79	4687.94	8019.24	5499.18	9902.5	5574.27
VCP_Hela_gRNA1399	VCP	4252.81	4888.14	5110.67	5135.8	1081.63	1129.81	1107.88	941.558	751.167	485.196	240.222	356.131
VCP_Hela_gRNA3137	VCP	4112.06	4227.75	3260.13	3352.73	2238.34	3095.01	3050.27	1686.96	1051.33	1438.26	2660.6	1077.99
UFD1_Hela_gRNA631	UFD1	6109.73	5250.34	7150.29	6547.66	8711.53	5849.02	9334.46	6906.61	8489.85	5558.96	9292.87	6431.48
GARS1_Hela_gRNA1281	GARS1	3081.05	5422.07	3703.39	4584.54	1514.19	2070.32	1702.87	2398.2	980.439	951.332	1535.29	2138.71
GTPBP4_Hela_gRNA2355	GTPBP4	3279.61	3497.1	3511.21	3092.05	3333.33	3327.89	3488.68	2774.37	3951.92	6955.64	5621.21	4623.95
GSTK1_Hela_gRNA592	GSTK1	5900.25	7332.99	6703.93	6607.44	7377.46	9895.21	9420.36	7606.31	6528.97	10172.7	7706.34	6570.67
HAUS7_Hela_gRNA259	HAUS7	5459.48	4724.21	5846.08	5571.66	4577.57	4413.26	6987.09	5131.03	5845.68	5612.68	9277.93	8317.73
CDC16_Hela_gRNA587	CDC16	2701.37	3083.38	4493.05	2943.98	2427.21	2165.18	2975.36	2694.52	2942.07	2745.69	5047.87	3127.43
SBNO1_Hela_gRNA3091	SBNO1	5324.19	6750.66	5541.53	5929.66	4726.36	6498.96	5307.07	5699.2	2830.45	7324.73	6415.54	5221.02
HADHB_Hela_gRNA1011	HADHB	4486.28	4992.74	5674.04	6175.75	3682.97	3894.5	3194.99	4456.25	5593.78	5691.53	6457.18	6940.24
SLC29A1_Hela_gRNA386	SLC29A1	6312.66	4917.8	5522.93	5462.52	7620.69	7053.6	8406.85	6182.44	8461.19	7117.66	9509.61	6723.3
YJU2_Hela_gRNA236	YJU2	4705.58	5681.23	4933.21	5125.37	6976.68	9848.64	9083.94	7976.94	7078.77	7952.02	9413.52	5744.18
gRNA_NT42	na	3971.32	3712.55	4015.69	3591.86	4309.01	3816.3	3792.94	4076.39	4620.13	3933.56	3493.37	4306.21
DARS1_Hela_gRNA1449	DARS1	4952.15	4639.91	3912.63	5126.07	2594.43	2805.29	1963.97	2022.04	1445.02	1199.99	950.213	1196.06
gRNA_NT59	na	1896.2	2040.5	2174.46	2621.43	2507.83	1444.31	2272.89	2656.67	4786.05	1981.51	3311.87	3648.66
SRRT_Hela_gRNA2364	SRRT	4056.42	2404.26	4503.12	3571.7	3130.64	2837.76	2443.01	3230.84	3546.17	3634.64	3085.52	3627.55
RPA1_Hela_gRNA236	RPA1	7244.39	6369.73	7068.92	6941.11	886.769	2655.3	2084.57	1750.19	404.242	692.271	782.591	929.205
IARS1_Hela_gRNA3171	IARS1	3254.52	4644.59	4135.03	3980.45	2345.22	2822.38	2404.07	2656.21	3767.9	4696.01	4476.68	4512.6
AARS1_Hela_gRNA1207	AARS1	5009.98	4927.17	4135.03	5614.76	6170.53	4291.05	3387.96	6095.2	4519.07	3239.55	1671.95	4090.23
gRNA_NT61	na	4307.36	4349.52	5250.16	4860.52	6555.64	4771.77	5260.52	4051.01	5770.26	7070.87	6602.38	4754.5
CCT2_Hela_gRNA258	CCT2	4298.63	3031.86	3549.18	2551.22	4604.75	3607.35	3098.51	2504.36	6485.98	4493.27	4348.56	4264.94
SYPL1_Hela_gRNA680	SYPL1	4615.02	5038.02	4961.11	6236.23	4454.58	5702.45	6750.53	6330.13	5853.97	6194.92	8433.41	7612.18
gRNA_NT9	na	3419.26	3351.91	3595.68	4250.87	3469.69	3419.76	4828.04	3644.85	5062.08	3666.7	7041.19	5236.38
RRM1_Hela_gRNA1815	RRM1	3692.02	3785.93	4447.33	3352.73	878.477	461.922	837.469	698.784	301.674	78.8444	164.419	351.332
AQR_Hela_gRNA2246	AQR	5317.64	5086.41	7135.56	6009.61	4385.02	4774.33	5395.1	5010.1	5473.87	7147.12	8561.53	8788.09
RPL17_Hela_gRNA247	RPL17	2714.46	2736.8	2775.8	2841.09	173.669	349.539	449.838	119.079	200.613	348.302	4.27062	357.091
CNOT3_Hela_gRNA1190	CNOT3	4728.49	4550.92	5534.56	6074.95	5488.76	5486.23	6898.22	6349.52	4444.4	6680.12	7885.7	8235.17
RPS28_Hela_gRNA213	RPS28	3604.74	5226.92	4419.43	6140.3	4818.5	5930.21	5027.78	7377.85	3309.36	5513.04	6594.91	10385.4
HDDC2_Hela_gRNA278	HDDC2	4573.57	4891.26	4420.21	3770.52	4417.72	3730.84	4770.48	3603.31	5483.67	4400.56	6977.13	5063.59
NUP133_Hela_gRNA3018	NUP133	4780.86	6276.05	5831.35	4497.65	1861.06	2743.76	3222.08	2584.67	1134.29	662.813	508.204	1507.08
PPP3R1_Hela_gRNA667	PPP3R1	4129.52	3982.64	2544.1	4560.21	5310.48	4699.55	2187.83	4736.41	4976.1	5848.35	3341.76	6417.08
GTPBP4_Hela_gRNA1400	GTPBP4	3366.9	3873.36	3890.15	3169.9	3121.43	3500.09	3099.35	3280.22	4277.73	4533.99	5122.61	5329.49
RACK1_Hela_gRNA1233	RACK1	3322.16	4845.99	4320.24	4637.37	1992.35	2647.18	2507.75	2285.12	650.861	983.389	690.773	1087.59
COPA_Hela_gRNA3712	COPA	6137	5865.46	4469.03	5548.72	5040.53	5577.68	3410.39	5101.03	5768	5418.6	3731.46	4814.01
HMGB2_Hela_gRNA933	HMGB2	6398.85	5543.85	4126.51	5483.38	8625.38	9734.97	6976.09	8335.56	9480.09	10006.3	6595.98	7079.43
SDF4_Hela_gRNA1206	SDF4	8681.27	6736.61	7235.53	6056.88	12308.4	10432.3	9678.92	9667.12	12244.2	7595.06	8698.19	7670.74
MTREX_Hela_gRNA1921	MTREX	4029.15	4054.46	4100.16	4193.17	812.603	875.558	1284.34	1452.95	326.562	10.3971	340.582	250.54
MAT2A_Hela_gRNA812	MAT2A	3845.85	5473.59	6402.48	4634.59	550.948	602.08	1498.47	910.634	281.311	145.559	639.526	586.513
KARS1_Hela_gRNA903	KARS1	3401.81	4866.28	3710.37	3975.59	675.787	1148.61	993.622	1007.56	24.8881	253.862	93.9537	661.387
SF3B1_Hela_gRNA3046	SF3B1	2736.28	4293.32	3393.42	3809.44	3420.39	5314.45	3077.35	4068.08	3749.8	5095.43	4452.12	4018.24
POLA1_Hela_gRNA4267	POLA1	4047.69	3657.91	3595.68	3735.06	3464.62	2582.23	2514.52	3270.99	4417.25	4276.66	4668.86	4618.19
VARS1_Hela_gRNA1439	VARS1	6865.8	4580.58	5090.52	5013.45	8482.58	7468.09	7042.95	6414.13	7356.31	7044.01	5680.99	4854.33
POLA1_Hela_gRNA2466	POLA1	4414.28	4716.41	2989.68	3431.98	1193.11	1167.84	869.207	1430.8	248.126	136.895	322.432	266.858
CNPY3_Hela_gRNA825	CNPY3	4417.55	4215.26	3577.08	3649.56	5365.76	4207.29	4362.12	3235.91	5123.92	5104.09	7327.32	4446.36
UBA52_Hela_gRNA402	UBA52	4513.56	4672.69	5367.17	5437.5	1320.71	1658.82	2032.52	1758.5	335.612	729.528	116.374	80.6335
gRNA_NT58	na	7837.91	6439.98	7647.02	5250.5	10343.2	9899.06	11470.2	8042.94	11788.6	10342.5	12761.7	6573.55
BOP1_Hela_gRNA775	BOP1	3532.73	3334.74	3464.72	4720.1	3505.16	2815.97	3227.15	4072.24	704.408	380.359	370.476	829.373
SNRNP200_Hela_gRNA1625	SNRNP200	4766.68	6760.03	5758.51	6521.94	608.992	476.878	454.916	763.862	140.278	151.624	146.269	644.108
NEDD8_Hela_gRNA339	NEDD8	5721.32	4800.71	5288.13	6156.98	6934.3	4049.19	6917.27	6478.29	10180.7	7840.25	10882.6	8168.94
SF3A3_Hela_gRNA1439	SF3A3	7613.15	6277.62	8390.18	8235.49	10289.7	7201.03	12459.6	8956.8	11285.6	8449.35	18196.1	9320.85
GTPBP4_Hela_gRNA1055	GTPBP4	5232.54	5645.33	5744.56	5436.8	6539.52	6113.95	6443.31	5898.12	4554.52	5052.11	5799.5	5067.43
U2AF2_Hela_gRNA252	U2AF2	6814.53	7005.14	6036.71	5792.02	8717.98	7286.06	8792.37	8139.86	8394.82	9047.18	8512.42	7002.63
YJU2_Hela_gRNA304	YJU2	4907.42	3751.58	4415.56	4825.06	8324.57	5091.4	5270.26	8003.71	6274.81	4738.46	5404.47	7061.19
RPL10_Hela_gRNA623	RPL10	6001.71	6124.62	5959.99	5505.62	3622.16	5039.26	5271.1	3608.84	1251.19	1574.29	1732.8	1385.17
PSMA6_Hela_gRNA352	PSMA6	3500	4507.21	4800.7	4896.67	4367.97	6019.94	6130.16	5286.57	4814.71	5016.58	6369.63	5341.97
ELOB_Hela_gRNA386	ELOB	4679.4	4152.81	4070.71	4743.04	3257.78	2529.25	2683.37	2253.28	1542.31	1624.54	810.35	1652.99
COPB1_Hela_gRNA841	COPB1	4026.96	6171.45	5707.37	5301.25	6227.65	4965.77	6301.12	5600.42	5163.9	6164.59	6682.46	7245.49
gRNA_NT87	na	2904.3	1391.04	2414.68	3033.65	2914.59	2203.21	2961.82	3386.84	3243.74	2561.14	4419.03	6035.03
ELOB_Hela_gRNA214	ELOB	4196.07	3929.56	2776.58	4750.68	3444.81	4089.78	3820.03	4643.64	3666.09	4190.88	3802.99	4544.27
SLC35B1_Hela_gRNA675	SLC35B1	3702.93	3784.37	2941.64	2948.84	4924.45	5185.83	3280.9	3496.23	6050.82	5182.07	4881.32	4298.53
gRNA_NT62	na	4337.91	4134.08	3815.76	3716.29	5727.38	5323.85	4433.63	5659.96	5841.15	6541.49	4981.68	6130.06
VCP_Hela_gRNA2215	VCP	2976.31	3361.28	3454.64	4169.53	3372.49	3945.78	2532.72	4260.09	4234.74	5389.15	4228.98	6212.62
SYPL1_Hela_gRNA323	SYPL1	2331.51	4580.58	4717.78	4370.43	4157.45	4692.29	4353.65	4753.48	3977.57	4585.11	5590.24	5584.83
PAM16_Hela_gRNA327	PAM16	6323.57	5813.94	6631.08	5275.52	8560.43	9429.02	9117.37	7702.31	7041.06	8043.86	8026.63	6028.31
CKB_Hela_gRNA1416	CKB	5812.97	6365.04	5922.02	6679.74	10435.3	9226.05	6665.9	8578.79	10592.5	9694.4	6808.44	7085.19
SF3B6_Hela_gRNA384	SF3B6	5963.53	5787.4	6197.12	6717.27	4492.81	5742.19	6292.66	5357.65	5906.77	6914.05	10432.1	6042.71
LTA4H_Hela_gRNA1710	LTA4H	5599.13	5217.56	6134.35	4822.28	5061.72	3681.7	5405.67	5245.96	7528.26	4770.52	6026.91	5342.93
COPB1_Hela_gRNA1386	COPB1	5412.56	5447.05	4942.51	4173.01	1167.31	1149.46	1641.93	1548.49	519.633	189.746	1598.28	960.882
gRNA_NT88	na	2880.3	2835.15	2334.09	3771.21	3747	4214.13	4109.9	3967.93	2888.52	3463.09	4070.97	4634.51
CWC22_Hela_gRNA443	CWC22	5529.3	4905.31	3938.2	5447.92	959.093	598.661	596.258	982.174	973.651	460.07	579.737	966.642
OAZ2_Hela_gRNA483	OAZ2	5740.96	5546.97	5341.6	6616.48	6929.7	6645.52	7012.06	8263.56	6785.39	6201.85	5856.09	6315.33
SNRNP200_Hela_gRNA5995	SNRNP200	2637	3342.55	3998.64	2811.2	151.557	123.92	200.163	146.772	254.914	518.987	96.089	314.855
SLC29A1_Hela_gRNA723	SLC29A1	4197.16	6908.34	5507.43	5648.82	2678.73	7210	4064.62	6115.97	3102.71	7032.75	6457.18	6262.53
TIMM23_Hela_gRNA793	TIMM23	4259.35	3646.98	4518.62	4407.28	3711.53	3012.53	5186.89	4487.17	4421.03	3370.38	6276.75	5226.78
COPA_Hela_gRNA3689	COPA	3492.36	4535.31	3511.99	4971.74	806.154	944.355	434.181	1004.33	460.052	1049.24	274.387	741.06
NOP16_Hela_gRNA790	NOP16	3036.32	3920.19	4011.04	3428.5	3600.51	4610.25	5825.47	4084.24	2676.6	5857.01	5425.82	3616.03
YARS1_Hela_gRNA1205	YARS1	4932.51	4697.67	3879.3	4280.76	5662.42	5805.43	3964.75	3324.07	10939.4	8255.27	4945.38	7973.12
COX7A2L_Hela_gRNA188	COX7A2L	6419.58	5664.06	5688.77	7075.97	6108.34	6603.65	5489.46	6738.14	3380.25	5304.24	4603.73	4691.14
HDDC2_Hela_gRNA259	HDDC2	3965.87	5142.62	4255.92	4049.27	5046.52	5881.49	5723.9	3815.62	4414.24	5893.4	5614.8	3453.8
PSMA2_Hela_gRNA245	PSMA2	3257.79	2483.88	3167.92	2994.03	2337.85	1883.15	1984.7	2062.66	4611.83	2905.98	4240.73	3606.43
UTP4_Hela_gRNA1738	UTP4	4501.56	5589.12	5105.24	4119.48	4516.3	5798.17	5259.68	4368.55	3629.89	4857.16	5051.08	3986.56
LDHB_Hela_gRNA396	LDHB	4591.02	5028.65	4730.95	4092.37	7207.47	8321	6382.37	5611.96	6926.42	8724.01	5502.7	4781.37
DCTN2_Hela_gRNA420	DCTN2	4064.06	4600.88	4069.94	4587.32	4527.36	3932.1	3370.19	3686.38	6237.85	4314.78	3303.33	4343.65
MAT2A_Hela_gRNA1073	MAT2A	2523.53	3503.35	3133.82	3324.92	386.032	459.358	523.048	398.316	225.501	183.682	2.13531	275.498
SF3B6_Hela_gRNA303	SF3B6	4459.01	5593.81	6366.06	5766.3	3306.61	5043.97	5275.34	4031.62	4763.42	7010.22	10372.3	8167.98
GARS1_Hela_gRNA1283	GARS1	4237.53	3272.29	3643.72	3127.5	4715.31	2295.51	3206.42	3487.46	5553.81	2430.31	3133.57	4205.42
DARS1_Hela_gRNA1497	DARS1	3268.7	4322.98	5732.94	4474.01	2222.68	3679.99	4800.53	3831.77	2752.77	6330.08	7379.63	5293.97
XPO1_Hela_gRNA2515	XPO1	4126.25	5973.18	6492.37	4859.13	4744.33	6696.37	8554.12	6399.83	5617.91	5751.31	7475.72	7463.4
RPS6_Hela_gRNA153	RPS6	4295.36	2680.59	4252.05	4016.6	1627.51	1738.3	1825.59	1987.89	1438.98	1007.65	1810.74	1539.72
CCDC167_Hela_gRNA275	CCDC167	4587.75	4705.48	5571.75	4861.21	5567.07	4361.55	6172.47	5098.72	7422.68	5163.01	7187.46	5416.84
SNRPD2_Hela_gRNA624	SNRPD2	4428.46	4813.2	3374.05	4396.85	6593.88	6821.57	5450.95	6759.83	7657.23	7875.78	5999.16	7008.39
PSMD2_Hela_gRNA1979	PSMD2	7108.01	6397.83	5916.6	5276.22	10244.6	9462.78	6795.81	6349.98	11415.3	9657.14	6376.04	6067.67
INTS11_Hela_gRNA520	INTS11	5342.74	4972.45	5481.86	5286.65	5610.37	5510.16	6385.33	5636.89	4694.79	3339.19	4708.36	3196.54
CDC16_Hela_gRNA853	CDC16	4772.13	5267.51	3518.96	5467.39	1920.03	2597.62	1692.29	2567.13	524.912	810.105	698.247	1477.32
TRRAP_Hela_gRNA3386	TRRAP	5626.4	5885.75	6541.97	5637.7	2324.03	3696.66	4131.06	3036.52	477.398	1945.98	1020.68	1166.31
NOP16_Hela_gRNA766	NOP16	5810.79	7776.37	6317.24	6198.69	5157.54	7466.81	5485.66	6020.43	6162.44	7423.51	6934.42	6761.69
CIAO2B_Hela_gRNA385	CIAO2B	2595.54	2716.5	2759.53	2731.26	2980.93	3500.52	2043.1	3162.07	3795.81	2859.19	2189.76	3153.34
POLA1_Hela_gRNA2175	POLA1	5936.25	5468.91	5991.77	5247.02	7260.91	4610.25	5108.18	5517.81	8484.57	6363.87	6665.37	8938.8
CCT2_Hela_gRNA1081	CCT2	3118.14	5404.9	4669.73	4598.44	1661.6	3832.11	3238.58	2250.97	1516.66	3833.92	3472.02	2167.5
YARS1_Hela_gRNA1685	YARS1	5679.86	4689.87	5398.17	4470.54	6408.23	5090.54	5959.19	4951.49	6454.3	7400.11	6060.01	6382.52
CSE1L_Hela_gRNA524	CSE1L	4965.24	4725.77	4176.1	3659.99	885.848	319.2	582.293	216.928	414.801	62.3824	0	224.622
YJU2_Hela_gRNA678	YJU2	4497.19	6460.28	5388.09	5463.22	5128.06	9255.53	6642.62	7295.69	4341.08	7948.56	4962.46	8118.06
WDR75_Hela_gRNA857	WDR75	5648.22	5389.29	5202.11	4790.31	4646.21	3001.42	3519.15	3218.84	2095.88	324.042	582.94	729.541
CIAO3_Hela_gRNA907	CIAO3	7099.28	7219.02	7021.65	7080.14	11003.3	10640.9	9166.46	9366.19	10142.3	9758.51	8371.49	8767.93
TMEM50A_Hela_gRNA676	TMEM50A	3222.88	3511.16	4472.9	3888.69	2010.32	2749.74	3869.54	2936.83	3439.08	5251.39	8087.49	4966.64
HNRNPU_Hela_gRNA1779	HNRNPU	2819.2	3500.23	3842.11	3113.6	1936.15	3183.46	2402.38	1889.58	2115.49	3062.8	1725.33	1605.95
EIF1AX_Hela_gRNA498	EIF1AX	3314.53	5262.83	4170.68	4101.41	3428.69	6043.44	4784.03	3547.46	4829.79	6641.13	5383.12	3891.53
gRNA_NT76	na	5588.22	5990.35	5374.92	6128.48	8696.33	8497.91	8283.28	8947.57	7345	8135.7	9833.11	5851.69
RPL7_Hela_gRNA840	RPL7	2572.63	2674.35	2857.94	3070.5	381.887	155.113	243.327	210.927	248.126	343.103	328.838	258.219
RPLP1_Hela_gRNA382	RPLP1	7849.91	7339.24	5946.82	7635.57	9522.75	11886.1	9930.29	12177.5	7065.95	11734	10284.7	11287.7
gRNA_NT89	na	3059.23	3084.95	3601.88	3119.16	4484.52	4390.61	4770.48	3306.99	6005.57	4118.97	4883.46	3259.9
gRNA_NT75	na	4277.9	3322.25	4042.04	2574.85	4748.48	3344.98	2976.21	2172.05	7575.78	6749.43	4525.79	3657.3
ITM2C_Hela_gRNA515	ITM2C	3862.22	4831.94	5082	4795.17	6240.55	6176.34	5929.15	6845.68	4357.67	5738.31	6364.29	6360.45
WBP2_Hela_gRNA359	WBP2	4840.87	5350.26	4756.53	3927.62	5348.25	5631.52	5184.78	4557.79	7683.62	5374.42	5793.1	5159.58
GTPBP4_Hela_gRNA1056	GTPBP4	6310.47	5896.68	5208.31	5331.14	2619.77	2401.91	2832.33	3381.76	472.873	696.603	832.771	1246.94
KARS1_Hela_gRNA1404	KARS1	3575.28	3444.02	3984.69	3835.86	668.417	723.008	573.829	510.934	466.84	249.53	176.163	314.855
TSG101_Hela_gRNA468	TSG101	4016.05	4043.53	3963	3877.57	5191.63	4738.87	4978.69	5018.41	7611.98	5301.64	4183.07	5425.48
TRAM1_Hela_gRNA515	TRAM1	4861.6	3394.06	4357.44	4495.56	3650.72	2273.72	3844.57	3727.46	6731.84	4585.11	5585.97	5415.88
INTS11_Hela_gRNA357	INTS11	5083.07	7012.94	5339.27	5089.22	5831.95	8173.58	6172.47	6819.37	6577.99	8401.7	5993.82	7702.42
SNRNP200_Hela_gRNA1818	SNRNP200	4081.51	4368.26	5212.18	5226.17	225.723	318.346	399.48	210.927	108.602	224.403	95.0213	403.167
NOP16_Hela_gRNA916	NOP16	3610.19	4757	4484.52	4582.46	5268.1	5877.65	4059.97	5580.58	5121.66	6580.48	4733.98	6386.36
ANXA2_Hela_gRNA301	ANXA2	4738.31	3707.87	3992.44	3916.5	4730.97	4010.73	3057.04	3886.7	2991.85	4216.88	2977.69	3603.55
ELOC_Hela_gRNA256	ELOC	6161	6255.76	7285.9	6312.69	7797.12	7863.78	8588.4	8035.55	9500.45	7172.24	11066.2	7952
YARS1_Hela_gRNA1564	YARS1	4486.28	5482.96	6390.08	5358.94	5806.15	7699.27	7378.95	6073.97	6745.42	7174.84	7711.68	8331.17
BUD23_Hela_gRNA135	BUD23	5247.82	4853.79	5245.51	5624.49	5982.12	4674.77	5428.1	5496.58	5114.87	3069.73	5860.36	4981.04
PRC1_Hela_gRNA507	PRC1	5264.18	4505.64	6518.72	5065.59	4297.49	4713.23	6458.12	5696.43	2685.65	1796.96	3192.29	2495.8
CSE1L_Hela_gRNA981	CSE1L	4753.58	5217.56	5946.04	5438.19	2061.91	3417.62	3323.22	3231.3	262.456	648.084	162.284	539.476
SF3A3_Hela_gRNA2041	SF3A3	7236.75	7298.64	5306.73	6480.23	8128.79	7819.77	5152.19	6256.28	7676.84	10695.1	6242.58	7129.34
LDHB_Hela_gRNA286	LDHB	4010.6	4886.58	4007.17	4876.51	3684.81	4996.11	4338	4463.63	2362.86	3150.31	2025.34	2703.14
KARS1_Hela_gRNA624	KARS1	3707.29	3693.82	4113.33	4124.35	4052.88	5464.87	3573.31	3400.69	4523.59	6822.21	4950.72	3642.91
VIRMA_Hela_gRNA1114	VIRMA	3586.19	3593.9	3708.82	3974.2	3251.33	3390.28	3098.09	3801.31	2402.83	3494.28	3942.85	3653.46
LSM8_Hela_gRNA222	LSM8	5038.34	3823.4	3777.01	5040.56	4442.6	4006.88	2821.33	4109.16	4306.39	3995.94	2443.86	3752.34
POLA1_Hela_gRNA3248	POLA1	2599.91	3237.94	2924.59	3705.17	3108.53	3393.69	2465.43	2937.29	3379.5	2881.72	2528.21	3127.43
gRNA_NT36	na	3772.76	2813.3	3902.55	2695.81	5944.35	5214.46	6861.83	4081.93	4930.85	5688.93	5654.3	3838.73
LSM8_Hela_gRNA311	LSM8	3759.66	2802.37	3694.1	4234.88	4022.94	2752.73	3595.74	4632.1	4271.7	3670.16	4739.32	5716.34
RNF167_Hela_gRNA1286	RNF167	4730.67	4653.96	3590.25	3521.65	4110.46	3086.89	3299.94	3367.92	5981.43	3936.16	4871.71	5084.71
gRNA_NT21	na	2978.49	3394.06	4095.51	4171.62	2544.22	3920.57	3920.74	4494.56	2645.68	4454.28	8274.33	5416.84
BUB1B_Hela_gRNA2389	BUB1B	4093.52	5134.81	6007.26	3775.38	4457.8	4555.98	6860.14	5489.19	6391.71	7721.55	9846.99	7000.71
RRM1_Hela_gRNA1227	RRM1	5680.95	4002.94	4437.25	5955.39	3634.6	3075.78	3244.08	4288.7	5356.21	3486.48	3496.57	5145.18
EMP3_Hela_gRNA307	EMP3	4560.47	5236.29	4613.94	4020.08	5980.74	5318.73	6961.28	4930.72	5442.94	7387.12	7360.42	5832.49
TUBB_Hela_gRNA1301	TUBB	3654.93	4490.03	3432.94	3820.57	1110.19	1490.03	751.141	802.171	188.546	441.009	101.427	30.7175
gRNA_NT10	na	1834.01	1572.14	1989.25	2134.12	2024.14	2205.35	2133.24	2299.89	2727.13	2744.83	2973.42	2587.95
SPOUT1_Hela_gRNA532	SPOUT1	4573.57	4586.83	5728.29	4984.25	6419.29	5184.55	7400.96	5716.73	6544.05	8565.45	10426.7	6420.92
gRNA_NT96	na	4787.41	4201.21	4286.14	2283.58	6048.46	4579.05	4897.44	2928.98	7299.74	5504.38	4769.22	3656.34
gRNA_NT40	na	737.531	2421.43	1022.13	1352.07	692.371	2270.3	1124.38	1462.65	887.674	2256.16	2418.24	2169.42
gRNA_NT18	na	2033.67	3030.3	2908.32	3997.14	2652.94	3673.58	4424.75	4179.32	2841.01	4040.13	5877.44	6443
gRNA_NT93	na	2611.91	2221.6	3205.89	2323.2	3917.91	3069.79	4696.01	3161.6	5062.08	1790.89	4287.7	3086.15
SF3B1_Hela_gRNA224	SF3B1	4225.53	4265.22	3367.07	3457.7	583.655	554.221	586.101	355.854	389.159	485.196	254.102	333.093
RPLP2_Hela_gRNA498	RPLP2	2820.29	3645.42	5292	4178.57	1108.81	1582.76	2571.23	1626.96	457.79	179.349	508.204	331.173
NEDD8_Hela_gRNA323	NEDD8	5567.49	4910	5367.95	5641.87	4382.25	4595.72	5512.32	4800.1	5601.32	6067.55	7331.59	5748.98
gRNA_NT22	na	3373.44	3400.31	3511.99	4451.07	4075.91	2836.91	2944.89	4519.02	3132.13	4746.26	3564.9	6011.03
TERF2_Hela_gRNA619	TERF2	3675.65	4116.9	4905.31	4499.04	2847.33	3572.31	4665.96	4081.01	4519.07	5710.59	5334.01	5542.59
ITM2C_Hela_gRNA746	ITM2C	4804.86	5637.52	4156.73	5328.36	6109.26	6446.82	6418.76	6700.29	6869.86	6263.37	6490.28	6324.93
CDC5L_Hela_gRNA1001	CDC5L	3295.98	4107.54	2585.17	2358.66	3185.92	3775.71	2491.67	1646.34	3811.64	3405.04	2906.16	1780.66
LSM8_Hela_gRNA248	LSM8	3716.02	4052.89	3455.42	6054.1	4062.09	3903.05	3078.62	5491.04	5031.91	7471.16	3159.19	9170.14
PRELID3B_Hela_gRNA735	PRELID3B	4951.06	5139.49	4543.42	4631.12	5142.34	4668.36	5176.74	4146.09	4150.27	2516.09	3858.51	2231.82
PSMA6_Hela_gRNA718	PSMA6	4983.79	4475.98	6242.84	4878.59	6154.87	5605.88	6000.66	5538.58	6976.95	6944.37	8700.32	6308.61
LTA4H_Hela_gRNA1812	LTA4H	6514.49	4507.21	5574.85	4866.08	7071.12	3061.67	5195.78	4077.78	8393.31	4197.82	6546.86	8119.98
PRPF8_Hela_gRNA4517	PRPF8	3555.64	3565.8	2826.17	3354.12	141.883	201.263	182.813	62.309	676.503	181.949	86.4801	217.902
RPLP2_Hela_gRNA711	RPLP2	3885.13	5211.31	5185.84	4494.17	2666.3	2749.74	2522.99	2370.97	2153.19	1146.28	705.72	1279.58
RPS28_Hela_gRNA117	RPS28	4872.51	5418.95	5226.13	5842.77	5306.79	5758.43	4507.27	5124.57	1853.03	1496.31	2126.77	2191.5
SFPQ_Hela_gRNA1387	SFPQ	3700.75	4441.64	5368.72	4462.19	1334.53	1507.12	1557.72	1708.65	609.38	154.223	266.914	1105.83
PSAP_Hela_gRNA1368	PSAP	4996.88	5020.84	4958.01	5553.59	6497.6	6402.38	6419.19	7773.39	7538.82	4539.19	5667.12	6793.37
TSG101_Hela_gRNA630	TSG101	3427.99	3587.65	3301.98	4757.63	4686.75	4258.14	4274.94	5575.5	5348.67	4676.95	6232.97	5515.71
gRNA_NT97	na	3423.63	3976.4	3166.37	3689.88	3252.25	4761.09	4474.26	3898.7	4165.36	5200.27	6574.62	5133.66
AARS1_Hela_gRNA2222	AARS1	3191.24	3183.3	3997.09	3163.65	3720.28	3509.92	3877.58	3989.62	4568.09	4280.13	4305.85	5186.46
LTA4H_Hela_gRNA962	LTA4H	3570.92	4349.52	3450.77	3549.46	3792.15	4438.04	2774.78	4723.02	3126.85	6688.78	3944.99	5458.12
DDX27_Hela_gRNA770	DDX27	3301.43	3306.64	3039.28	2652.71	2658.93	1973.32	2816.25	1856.81	4300.36	2635.66	3587.32	2602.35
gRNA_NT48	na	3812.03	3292.59	2957.14	2740.99	4480.83	3574.45	3570.35	2639.13	5836.63	5020.92	5116.2	4114.23
RPL7_Hela_gRNA680	RPL7	3126.87	3091.19	3642.95	2762.54	616.362	460.64	706.707	393.701	150.837	220.938	120.645	204.463
gRNA_NT29	na	4615.02	5077.05	4414.78	4291.19	5542.19	6060.96	6375.18	5853.35	8849.59	6303.22	5346.82	5224.86
RACK1_Hela_gRNA1232	RACK1	3095.23	6018.45	4142.78	4302.31	3045.88	3970.14	3109.51	3018.52	2081.55	1553.5	870.139	1120.23
STK25_Hela_gRNA1152	STK25	5112.53	4045.09	4462.83	4796.56	6168.69	5161.48	4759.48	6240.59	7252.23	5672.47	7240.84	7519.07
RAN_Hela_gRNA848	RAN	4736.13	4162.18	4946.38	4795.87	4221.48	3573.16	3571.2	4081.47	2580.82	3137.31	2957.41	2928.72
HADHB_Hela_gRNA350	HADHB	3852.4	4046.65	4271.42	4111.14	4516.76	5142.67	3941.48	5969.66	4706.86	4040.13	4493.76	4832.25
AQR_Hela_gRNA2004	AQR	3929.86	4583.71	4048.24	3983.23	187.488	479.869	216.244	66.0014	248.126	214.006	150.539	222.702
NIFK_Hela_gRNA330	NIFK	3671.29	3052.16	2579.74	3112.2	2691.17	1643.01	1556.03	1948.19	1119.96	674.943	357.665	1464.84
ELOB_Hela_gRNA195	ELOB	4579.02	5236.29	3845.21	4298.83	3276.21	3437.71	2412.54	3271.45	1656.94	3293.27	2110.75	2846.17
SMU1_Hela_gRNA378	SMU1	4789.59	3795.3	3945.95	3623.14	2987.38	2077.58	2214.91	2370.97	2866.65	2223.24	1561.98	2347.97
GSTK1_Hela_gRNA728	GSTK1	4949.97	6290.1	5511.31	5961.64	5009.67	6221.63	8326.03	8023.55	6031.21	8133.11	9194.65	7227.26
HMGB2_Hela_gRNA1151	HMGB2	3493.45	2911.65	3894.8	3834.47	4399.3	3517.61	6628.24	4906.26	5914.31	4017.6	8125.93	6134.86
TRAP1_Hela_gRNA1348	TRAP1	5336.19	3932.68	4003.29	4122.96	3693.57	3477.45	3147.6	2842.21	6231.82	5537.3	5221.9	6766.49
GARS1_Hela_gRNA1265	GARS1	3234.88	4016.99	4343.49	3494.54	3209.87	2987.32	3492.49	3131.14	4704.6	4648.36	6066.42	3842.57
RPLP2_Hela_gRNA501	RPLP2	3940.77	3074.02	3383.35	3106.64	2446.1	2107.92	1534.02	1619.11	659.157	365.63	241.29	409.887
SMU1_Hela_gRNA307	SMU1	4451.37	5898.24	6019.66	5631.44	698.359	1642.15	1323.7	1380.49	730.804	985.988	376.882	402.207
TRAP1_Hela_gRNA1136	TRAP1	3400.72	4024.79	2916.84	4974.52	3927.58	5658.01	3398.12	6250.28	4669.15	4614.56	3556.36	6105.11
WDR75_Hela_gRNA567	WDR75	5712.59	4977.13	4007.94	3723.25	2976.78	2219.45	2541.18	1839.27	394.438	151.624	193.246	203.504
RPL10_Hela_gRNA722	RPL10	6969.45	3821.84	4723.98	5210.88	5170.44	3888.95	3588.55	4410.09	1908.08	2989.16	2525.01	2206.86
DDX23_Hela_gRNA2235	DDX23	2561.72	2505.74	2713.81	2833.45	1889.62	1669.93	2312.24	2437.9	859.015	1038.84	1152	1184.54
MTREX_Hela_gRNA1724	MTREX	3738.93	4405.73	4324.89	4050.66	1165.93	1637.45	1335.97	1001.1	457.035	867.289	274.387	418.526
CIAO3_Hela_gRNA417	CIAO3	5437.66	4096.61	3936.65	3971.42	5551.4	2602.32	2813.71	4170.55	7897.06	2727.5	3807.26	4619.15
PSMA2_Hela_gRNA708	PSMA2	4912.87	3679.77	5047.9	5870.58	2470.52	2659.58	3993.53	4442.86	1418.62	1991.9	2727.86	2389.25
COX7A2L_Hela_gRNA329	COX7A2L	6693.42	4920.93	5650.8	5711.39	9978.8	6195.99	8720	8110.78	8193.45	5010.52	8986.46	7543.07
TERF2_Hela_gRNA494	TERF2	3668.02	4708.6	3592.58	3401.39	2627.14	4034.23	3919.9	2920.21	3817.68	4043.59	3748.54	2684.9
PRC1_Hela_gRNA1546	PRC1	3445.45	4421.34	5316.8	4834.1	3837.75	5863.55	4580.9	4338.55	2632.86	4416.15	4269.55	4631.63
CSE1L_Hela_gRNA1952	CSE1L	5317.64	4082.56	4081.56	4255.73	771.604	838.809	407.52	537.242	546.783	482.597	172.96	288.937
DARS1_Hela_gRNA727	DARS1	5293.64	3970.15	3867.68	5517.44	4578.49	2859.13	5008.73	6017.2	6199.39	4619.76	5518.71	5882.4
AQR_Hela_gRNA3702	AQR	3115.96	4493.15	3715.79	4532.4	54.8185	136.739	125.261	64.1552	793.401	551.045	38.4356	1096.23
BOP1_Hela_gRNA1616	BOP1	3287.25	4366.7	4237.32	4077.08	2928.87	4601.7	5701.05	5629.04	3414.94	3510.74	6011.97	5571.39
ANXA2_Hela_gRNA297	ANXA2	2922.85	3868.67	3756.09	3232.47	3606.5	4653.83	4856.39	4235.63	2999.39	5520.84	6041.86	3473.96
CPSF1_Hela_gRNA1496	CPSF1	3451.99	4091.92	5185.84	5374.93	4475.77	5489.65	8605.75	9185.73	3378.74	5266.11	6822.32	8578.83
AQR_Hela_gRNA1240	AQR	1500.16	2259.07	1860.61	1827.56	58.9644	77.3431	112.565	82.1556	469.856	253.862	1.06766	385.889
gRNA_NT55	na	4211.35	3970.15	3273.31	3390.96	6451.99	3926.98	3278.36	3708.54	6669.25	3738.61	2963.81	3741.78
TUBB_Hela_gRNA893	TUBB	3614.56	4213.7	5323	5123.98	2613.78	3902.19	4384.12	3270.99	2182.61	2337.61	2387.28	2442.04
SF3A3_Hela_gRNA2299	SF3A3	3762.94	5546.97	2705.28	5092.7	1971.62	3255.25	1945.77	3427.46	2039.31	3062.8	1319.62	2116.63
gRNA_NT54	na	1089.93	2060.79	2311.62	2561.64	657.361	2395.07	3512.38	2723.13	1157.67	2470.17	3352.44	4283.17
RAN_Hela_gRNA375	RAN	4059.69	5785.83	4183.85	3446.57	4991.7	5114.9	4405.28	3052.68	5548.53	4553.05	4451.06	2676.26
MARS1_Hela_gRNA1888	MARS1	3026.5	3586.09	4155.18	3153.22	3646.12	3031.34	4293.99	3343.45	4930.85	4185.69	5897.73	3782.09
NIFK_Hela_gRNA817	NIFK	2729.74	5465.79	4845.64	6095.81	2083.1	4238.06	4534.77	4464.55	1049.07	1643.6	1737.08	2099.35
AQR_Hela_gRNA2626	AQR	1876.56	1263.02	2249.62	2147.33	121.153	47.0041	54.5899	34.1546	62.5973	15.5956	52.3151	296.616
U2AF2_Hela_gRNA1253	U2AF2	4476.47	5162.91	6150.63	6127.09	1313.34	1646.42	1557.29	1651.88	1076.97	1239.85	279.726	671.946
gRNA_NT80	na	2704.64	3459.64	2906.77	2857.78	3439.74	3548.81	3161.56	3347.15	5515.35	4741.93	4621.88	4737.22
CNOT3_Hela_gRNA568	CNOT3	2543.17	4145.01	3257.81	3481.33	3049.1	5049.09	4543.24	3868.23	3040.11	4725.47	4798.04	4361.89
MDN1_Hela_gRNA1981	MDN1	3158.51	3394.06	3341.5	3268.61	1189.88	964.438	1305.93	1467.72	61.0889	184.548	80.0742	412.767
ARCN1_Hela_gRNA359	ARCN1	3270.89	4279.27	3598.78	4006.87	2454.39	3462.92	2142.13	2918.37	3479.05	2630.46	2701.17	4052.79
gRNA_NT24	na	3075.59	2138.85	3271.76	3427.8	2704.99	2321.15	2851.8	3990.08	3199.25	2079.41	5125.81	3601.63
RNF167_Hela_gRNA892	RNF167	3941.86	3796.86	4052.89	3952.65	4097.1	3668.88	2810.32	4117.01	5703.14	5143.95	5351.09	6206.86
PSMB3_Hela_gRNA532	PSMB3	3136.69	3776.56	3461.62	4250.87	3282.66	3446.68	5527.97	4895.64	3404.39	3849.51	7689.25	5623.23
BUB1B_Hela_gRNA472	BUB1B	2114.4	3276.97	3181.87	4538.66	2491.71	2988.18	3544.96	5471.65	3430.78	3686.63	5646.83	7587.23
SNRNP200_Hela_gRNA4020	SNRNP200	1156.48	1487.83	2172.91	2066	23.9543	39.3125	209.05	26.7698	141.787	77.978	19.2178	116.151
ARCN1_Hela_gRNA403	ARCN1	1927.84	2730.55	2777.35	2384.38	11.0558	92.7262	37.2397	16.1542	298.657	435.81	2.13531	319.654

## Sheet: A375-screen-count-table
gRNA	Gene	A0-R1	A0-R2	A0-R3	A0-R4	A7-R1	A7-R2	A7-R3	A7-R4
HADHB_HEK293T_gRNA1011	HADHB	8376.96	8662.98	7274.73	8415.91	10951.6	10873.3	7771.37	9839.6
ITM2C_HEK293T_gRNA417	ITM2C	9812.87	10439.2	10055.3	10435.5	17953.3	13210.7	13528.5	14816.3
MARS1_HEK293T_gRNA2226	MARS1	8019.78	7264.07	7703.14	7031.82	8829.08	6223.99	12285.1	6576.47
BUD23_HEK293T_gRNA135	BUD23	7161.59	7777.03	6930.77	10116.1	9071.34	7212.55	5034.8	9430.73
CNPY3_HEK293T_gRNA819	CNPY3	9289.09	9197.34	10077.9	9346.28	12788.7	10202.8	13217.3	11075.3
DARS1_HEK293T_gRNA727	DARS1	5816.77	6882.57	7511.59	6101.45	7487.63	10805.6	12175.8	9742.83
COX7A2L_HEK293T_gRNA187	COX7A2L	8966.66	8980.83	10483.7	8895.83	11748	12952.4	12494.3	13659.8
G6PC3_HEK293T_gRNA764	G6PC3	7530.75	7039.6	6393.2	6009.72	8721.18	14447.1	9375.03	7952.49
PRELID3B_HEK293T_gRNA642	PRELID3B	5780.81	5608.88	6148.1	5216.94	6113.46	5708.18	7538.96	8049.26
SLC35B1_HEK293T_gRNA561	SLC35B1	7149.6	8733.25	7155.27	8135.81	9146.52	12667.7	10725.1	10085.8
NOP16_HEK293T_gRNA765	NOP16	7191.55	6882.19	8337.52	6189.9	9274.61	8105.33	9647.83	8600.88
RPLP1_HEK293T_gRNA264	RPLP1	7022.55	6960.99	6494.12	7130.1	3328.22	1292.6	4120.41	4829.68
COPB1_HEK293T_gRNA1033	COPB1	9820.06	7935.77	9400.3	9464.21	215.106	492.084	151.627	179.639
CIAO3_HEK293T_gRNA1150	CIAO3	8991.84	7134.32	8158.33	7524.85	8973.18	6744.19	7221.14	7686.96
LTA4H_HEK293T_gRNA962	LTA4H	4868.68	5544.85	4780.48	5298.84	5633.82	7343.48	5898.21	8723.06
COPB1_HEK293T_gRNA1034	COPB1	7462.43	7788.21	7894.69	6691.12	2176.12	3270.6	2633.94	1329.45
gRNA_NT97	na	4203.46	5289.51	5748.52	5537.99	3090.14	8839.07	8299.74	8335.35
AARS1_HEK293T_gRNA2649	AARS1	7378.53	7200.8	6671.25	7595.28	7234.23	10412	6747.06	12182.8
RPP21_HEK293T_gRNA108	RPP21	6732.49	6878.21	6139.86	7501.92	4254.78	9023.6	7252.26	10443.2
PRC1_HEK293T_gRNA1446	PRC1	9226.76	6912.31	7806.13	7434.76	6129.47	5226.64	5761.15	9266.81
RPS28_HEK293T_gRNA120	RPS28	5417.63	6251.97	6286.09	4920.47	3458.4	4522.78	5438.7	2764.14
UBA52_HEK293T_gRNA385	UBA52	5741.25	5833.34	5793.83	6099.81	3346.32	3423.5	2584.28	5871.22
GSTK1_HEK293T_gRNA591	GSTK1	8813.25	7376.59	8718.56	7932.7	9924.8	8758.22	10666.8	12239.6
RPS28_HEK293T_gRNA214	RPS28	7485.21	6752.25	8298.38	6540.43	8624.42	6665.11	7810.43	8712.78
SF3B1_HEK293T_gRNA224	SF3B1	8610.68	8081.06	9002.79	6519.13	1974.24	1348.84	675.368	219.558
EPRS1_HEK293T_gRNA3493	EPRS1	6227.88	7217.28	5779.42	6661.64	4575	7268.79	5709.51	5250.65
NARS1_HEK293T_gRNA1240	NARS1	5026.89	5152.93	5480.77	5877.05	5955.43	4416.46	2968.97	7827.89
VARS1_HEK293T_gRNA2129	VARS1	8545.96	8975.53	10222.1	8139.09	8593.09	8199.36	13179.6	10276.3
LSM8_HEK293T_gRNA222	LSM8	7240.69	6986.56	8405.49	7446.23	5795.32	5005.2	9664.38	7673.65
RPLP1_HEK293T_gRNA265	RPLP1	8451.27	7761.31	7754.63	7531.4	1475.11	749.55	2061.86	1931.87
ANXA2_HEK293T_gRNA309	ANXA2	7739.31	7739.72	7044.05	6781.21	2118.34	2626.5	1507.66	1399
GARS1_HEK293T_gRNA1341	GARS1	5783.21	5386.3	5622.88	6104.73	1148.62	1579.06	768.728	2377.04
HADHB_HEK293T_gRNA1010	HADHB	8116.86	7982.56	9647.46	7123.55	8944.64	15715.9	13672.2	9488.19
AQR_HEK293T_gRNA2004	AQR	7638.63	6924.24	7931.76	6951.56	1415.94	223.195	683.976	326.616
SLC35B1_HEK293T_gRNA962	SLC35B1	7836.39	7997.53	7313.87	5796.79	4719.8	5542.98	5206.95	4265.96
TUBA1B_HEK293T_gRNA1105	TUBA1B	7961.05	6946.41	7731.98	7190.7	6526.96	6980.57	8011.06	8166.6
DARS1_HEK293T_gRNA1531	DARS1	6513.15	7109.69	7221.18	7937.62	9088.04	12849.6	6718.59	10099.7
HMG20B_HEK293T_gRNA584	HMG20B	11155.3	9379.38	9750.45	8368.41	9523.82	11136	9595.52	10734.2
KPNB1_HEK293T_gRNA2189	KPNB1	7153.2	7852.05	7070.83	9654.21	5324.04	3761.81	3790.67	7100.26
gRNA_NT4	na	3945.76	4182.13	5173.88	3995.02	4816.56	6833.82	7101.96	4644.6
SPOUT1_HEK293T_gRNA1165	SPOUT1	4313.73	5922.37	4597.17	4378.3	8842.31	7315.36	4664.01	6068.4
RPS28_HEK293T_gRNA226	RPS28	8472.85	8546.67	7563.08	8605.91	3628.26	3044.77	2661.08	5027.46
POLA1_HEK293T_gRNA2466	POLA1	6103.23	5403.54	5274.8	5642.82	744.168	213.529	62.9019	1523.6
SF3B6_HEK293T_gRNA385	SF3B6	5607.01	6843.36	5682.61	7318.46	6577.08	12414.6	7371.44	11047.5
LTA4H_HEK293T_gRNA1812	LTA4H	7530.75	7454.25	8152.15	7094.06	7332.39	10781.9	7070.84	8422.45
SYPL1_HEK293T_gRNA658	SYPL1	7473.22	7557.49	7855.56	7347.95	9164.62	10342.6	12352	10260
MTREX_HEK293T_gRNA1921	MTREX	6629.41	6772.14	6422.03	6270.16	2344.58	2328.61	2991.48	1092.35
DCTN2_HEK293T_gRNA1068	DCTN2	9800.88	10106.6	8625.87	8997.39	11530.1	8456.82	8089.19	11733.4
PRC1_HEK293T_gRNA1799	PRC1	7050.12	7408.41	5970.96	6861.47	8687.76	5866.35	6085.6	8495.03
TRRAP_HEK293T_gRNA3155	TRRAP	5181.51	4554.16	4918.48	4533.91	6685.68	5595.7	5657.2	4083.3
EMP3_HEK293T_gRNA571	EMP3	10156.9	10428.4	10294.2	9947.41	8609.8	8949.78	12055.3	10422.7
LARS1_HEK293T_gRNA1224	LARS1	5096.41	4713.08	4494.19	4951.59	4714.92	6582.51	4517.68	7619.22
INTS11_HEK293T_gRNA903	INTS11	6149.97	6044.93	5703.21	6999.06	8442.03	5311.88	7791.23	6863.77
KPNB1_HEK293T_gRNA1930	KPNB1	5206.68	4608.52	6127.5	6730.43	6247.12	6796.92	8600.35	7431.11
RPS28_HEK293T_gRNA117	RPS28	8367.37	7918.16	7295.33	7169.41	5998.6	2947.23	3974.08	3728.86
SBNO1_HEK293T_gRNA2325	SBNO1	9423.33	7864.74	8049.17	8130.9	8954.38	11323.2	9288.96	8115.19
TMEM50A_HEK293T_gRNA578	TMEM50A	8927.11	8129.56	7641.35	6882.76	11444.5	8880.37	7651.52	7542.4
gRNA_NT86	na	5597.42	5769.89	5946.25	5592.04	9427.06	8503.39	7730.98	8164.79
COX7A2L_HEK293T_gRNA189	COX7A2L	7812.42	7442.51	7628.99	9721.37	10091.9	11817.1	9575.66	10231.5
SRRT_HEK293T_gRNA2411	SRRT	7433.67	7706.19	6848.38	6080.16	12548.5	12445.3	7869.36	7674.26
CNOT3_HEK293T_gRNA1190	CNOT3	8459.66	8693.09	7235.6	7885.2	10589.6	13309.1	9972.27	10087
RPL17_HEK293T_gRNA243	RPL17	5123.98	5412.44	4704.27	5131.77	3959.62	710.886	463.488	702.224
GMPPB_HEK293T_gRNA549	GMPPB	9308.26	9791	7009.04	8281.59	14595.9	16200.1	7779.31	10048.3
MAT2A_HEK293T_gRNA689	MAT2A	13520.1	11615	10150	10040.8	4346.67	2585.2	2605.46	3013.94
CIAO3_HEK293T_gRNA907	CIAO3	11220	10925.8	10294.2	9383.95	12973.2	12213.4	12982.3	10784.4
SNU13_HEK293T_gRNA676	SNU13	9030.19	9565.4	10028.5	9136.61	11366.5	11893.5	12207.6	9844.44
NOP16_HEK293T_gRNA766	NOP16	10159.3	9231.44	9993.49	9444.55	12271.5	10114.1	13688.8	9511.17
PSAP_HEK293T_gRNA1368	PSAP	7842.39	8032.76	6160.45	7767.27	10456.6	11069.3	5359.91	10077.3
UFD1_HEK293T_gRNA531	UFD1	7373.74	7749	7975.02	6525.69	11481.4	8966.48	14301.2	11008.2
INTS11_HEK293T_gRNA397	INTS11	8255.9	9783.99	8749.45	7945.81	10205.3	14186.1	12374.5	7703.9
SF3B1_HEK293T_gRNA3315	SF3B1	8036.56	7612.05	7346.82	5691.96	822.832	1481.53	434.354	1624.61
SLC35B1_HEK293T_gRNA913	SLC35B1	9835.64	9954.48	10230.3	10153.8	17571.8	9056.99	9686.23	13798.3
CIAO2B_HEK293T_gRNA389	CIAO2B	4712.86	5506.97	4796.96	4565.03	9921.32	8786.34	4858.68	5972.83
EPRS1_HEK293T_gRNA3756	EPRS1	6304.59	6905.49	6522.95	6519.13	3988.85	3827.71	7670.06	2978.25
NARS1_HEK293T_gRNA1738	NARS1	7589.48	8608.42	8300.44	8949.89	3805.07	4021.91	3703.27	3382.29
STK25_HEK293T_gRNA634	STK25	8386.55	8392.86	8566.14	9438	10712.1	12451.5	10394	9419.84
RPL30_HEK293T_gRNA321	RPL30	8592.7	8071.4	7315.93	6682.93	255.482	193.319	418.463	285.486
ITM2C_HEK293T_gRNA746	ITM2C	7259.87	6624.57	6413.79	7719.77	8322.29	8748.56	7242.99	6794.82
PRELID3B_HEK293T_gRNA188	PRELID3B	7866.36	8373.16	7161.45	7446.23	7060.9	9285.46	7478.05	8906.93
YJU2_HEK293T_gRNA678	YJU2	8913.93	8237.15	8323.1	7896.67	10191.4	8968.24	8389.79	7551.48
MDN1_HEK293T_gRNA7162	MDN1	8440.48	8203.43	8831.84	7831.15	1979.11	1840.04	3259.64	3070.19
RPP21_HEK293T_gRNA246	RPP21	9103.3	8848.8	9917.28	8564.96	12525.6	11465.6	14066.9	8120.03
RNF167_HEK293T_gRNA1286	RNF167	5766.42	5979.01	5966.85	7177.6	9728.49	7867.2	5117.57	10041.6
CSE1L_HEK293T_gRNA524	CSE1L	6706.12	7133.94	6829.84	7508.47	511.659	115.113	984.581	969.565
LDHB_HEK293T_gRNA380	LDHB	9105.7	9607.45	8259.25	8374.96	10554.1	8482.3	8735.42	6345.42
SFPQ_HEK293T_gRNA1206	SFPQ	10578.8	9458.75	11690.7	9714.82	5305.24	4144.93	7261.53	4823.03
SF3A3_HEK293T_gRNA2041	SF3A3	10823.3	9280.5	9087.24	9621.45	5850.32	9129.04	9263.8	9548.67
KARS1_HEK293T_gRNA624	KARS1	7005.77	8373.16	8318.98	7911.41	6652.96	7602.7	10398.7	9507.54
gRNA_NT61	na	5907.86	6153.09	5765	5606.78	7079	6723.1	6958.94	8743.62
WARS1_HEK293T_gRNA1668	WARS1	5834.74	6941.86	7385.95	6301.28	4826.3	13527.9	12839.3	8361.97
WDR75_HEK293T_gRNA525	WDR75	7910.71	7358.97	7931.76	7913.05	638.356	467.48	2124.76	549.198
RRM1_HEK293T_gRNA1227	RRM1	8327.82	6946.97	7293.27	7875.38	634.179	130.93	2143.3	1732.88
SNRNP200_HEK293T_gRNA4020	SNRNP200	5313.36	6023.34	5548.73	5141.6	4.87295	1392.77	3.31063	61.6941
PAM16_HEK293T_gRNA170	PAM16	7491.2	6591.23	7114.08	6497.84	7180.63	8962.97	8487.12	8285.15
gRNA_NT67	na	5883.89	5636.15	7140.85	7084.23	7878.86	9114.98	8683.11	8181.72
GSTK1_HEK293T_gRNA592	GSTK1	9199.19	9355.32	8003.85	9390.5	13225.9	14025.3	12153.3	12115.6
PSMD1_HEK293T_gRNA1150	PSMD1	6748.07	5963.29	4689.85	5041.68	410.72	437.604	2.6485	235.889
LARS1_HEK293T_gRNA975	LARS1	6818.79	6810.4	7552.79	5929.46	7997.9	5035.08	8756.61	7639.78
ELOC_HEK293T_gRNA256	ELOC	8217.55	8358.19	8899.81	7156.3	13069.9	7143.13	11526.3	11257.4
EIF4A1_HEK293T_gRNA947	EIF4A1	7332.98	5421.91	5727.92	5221.86	115.558	349.731	411.842	563.11
DCTN2_HEK293T_gRNA579	DCTN2	7349.76	7565.83	7107.9	7724.68	10143.4	8515.7	8811.57	9184.55
EIF3D_HEK293T_gRNA1679	EIF3D	11472.9	10824.3	10776.2	9236.53	5357.46	3589.58	4670.63	4326.45
PSMA2_HEK293T_gRNA392	PSMA2	8626.26	7569.43	7423.03	6782.85	2872.95	1716.14	2239.31	2381.88
HMGB2_HEK293T_gRNA1151	HMGB2	5351.71	5702.07	6477.64	5415.14	11074.8	5480.59	9618.7	6508.12
SNU13_HEK293T_gRNA391	SNU13	6580.27	7678.16	5847.39	6912.25	3530.1	7153.68	4666.66	3955.07
TSG101_HEK293T_gRNA467	TSG101	6215.9	5968.97	6092.49	6730.43	2613.29	1747.78	1189.18	982.871
HMG20B_HEK293T_gRNA749	HMG20B	7338.98	7346.85	6076.01	6258.7	9562.81	10787.2	6237.22	5311.74
CIAO3_HEK293T_gRNA1396	CIAO3	7198.74	7816.44	8127.43	7456.05	10714.9	8996.36	12305.6	12938.2
RPS11_HEK293T_gRNA394	RPS11	9340.63	7879.51	8236.59	8247.2	3107.55	3705.57	2267.78	2343.77
NEDD8_HEK293T_gRNA323	NEDD8	7389.32	7351.02	8370.47	6093.26	5669.32	12447.1	12599.6	8959.55
SARS1_HEK293T_gRNA1185	SARS1	8802.46	8777.58	7359.18	9344.64	1878.17	1760.08	2918.65	2321.39
CCDC167_HEK293T_gRNA334	CCDC167	5953.41	6351.99	5867.98	5130.13	7785.57	7347.87	8231.54	8739.39
EMP3_HEK293T_gRNA573	EMP3	7026.14	7542.72	6687.73	7295.53	6609.11	8438.37	7979.94	9370.85
VARS1_HEK293T_gRNA1001	VARS1	5672.93	6284.18	6564.15	7806.58	13209.9	9361.03	11549.5	12385.4
INTS11_HEK293T_gRNA630	INTS11	8978.65	8278.63	9869.91	7341.4	13057.4	9727.45	13796	8762.98
EIF4A1_HEK293T_gRNA893	EIF4A1	6345.34	5454.87	5245.96	5461	755.306	1811.92	1757.94	1945.18
RPLP1_HEK293T_gRNA383	RPLP1	7949.06	9024.4	9964.65	10014.6	9384.6	11561.3	14249.6	9212.98
AARS1_HEK293T_gRNA1207	AARS1	7276.65	8703.7	7095.54	6396.29	7554.46	8897.94	6765.6	9813.59
BUB1B_HEK293T_gRNA472	BUB1B	3724.02	4464.94	4902	4661.67	5002.43	5802.2	8089.19	9107.13
COPG1_HEK293T_gRNA2323	COPG1	12425.8	8918.7	11707.1	9632.92	4261.04	3192.4	4646.13	2147.2
YAE1_HEK293T_gRNA195	YAE1	10008.2	8890.48	8504.35	10617.3	15171.6	9942.74	6960.93	10517.6
HAUS7_HEK293T_gRNA392	HAUS7	7149.6	6654.88	7002.86	8214.44	8222.75	8730.1	9168.45	8087.37
RPL30_HEK293T_gRNA381	RPL30	6660.57	6746.18	5777.36	6565	1469.54	1243.39	511.161	273.994
IARS1_HEK293T_gRNA896	IARS1	5973.78	5545.8	6067.77	7652.61	3695.78	6295.17	7995.83	7208.53
WBP2_HEK293T_gRNA584	WBP2	7111.24	7081.47	8514.65	8350.39	11374.8	11685.2	13313.4	8185.96
GARS1_HEK293T_gRNA1281	GARS1	4986.14	5811.75	5367.48	4332.44	1181.34	2092.24	2135.35	2038.32
SPOUT1_HEK293T_gRNA498	SPOUT1	14045.1	12926.7	15033.5	15790.1	21298.9	14203.7	19647.9	23939.7
PSMD1_HEK293T_gRNA1484	PSMD1	6444.83	5279.84	5816.49	4974.52	4.87295	118.627	5.95913	3113.74
CWC22_HEK293T_gRNA1101	CWC22	7537.94	7219.75	7254.14	8258.66	123.216	634.437	121.169	2217.96
LARS1_HEK293T_gRNA1285	LARS1	6797.21	6869.12	6901.93	6546.98	3993.73	3703.81	3423.19	3364.75
TRRAP_HEK293T_gRNA8338	TRRAP	7144.81	6929.74	8930.7	7470.8	5231.45	4303.1	5304.29	5381.9
CCT8_HEK293T_gRNA427	CCT8	4729.64	4890.01	4574.51	5960.58	5792.54	4892.72	3904.55	6877.68
gRNA_NT13	na	5680.13	6041.33	6584.74	6691.12	5382.52	10069.3	8062.7	9560.77
PSMA6_HEK293T_gRNA352	PSMA6	6650.99	6426.62	6201.65	7023.63	6608.41	3166.91	4959.98	7723.86
BUD23_HEK293T_gRNA236	BUD23	5374.49	4732.03	5280.98	4384.85	3909.49	2799.61	3261.63	3182.69
OAZ2_HEK293T_gRNA483	OAZ2	9013.41	9787.97	9212.88	7578.9	8510.95	16310	13999.3	8293.01
HYOU1_HEK293T_gRNA373	HYOU1	7800.44	6702.62	6821.61	6958.11	4193.52	2425.27	4264.09	3474.83
GSTK1_HEK293T_gRNA504	GSTK1	6547.91	8513.14	7134.67	7197.25	14303.5	11521.8	10762.8	7527.89
POLA1_HEK293T_gRNA4267	POLA1	5381.68	6218.45	5762.94	6034.29	2882.7	7432.23	5785.65	4016.77
EIF3B_HEK293T_gRNA2083	EIF3B	8029.37	8236.01	7795.83	7931.07	3642.18	3553.55	4174.04	2644.38
TUBA1B_HEK293T_gRNA556	TUBA1B	8294.25	8846.91	8654.71	7421.66	5090.84	3840.02	5667.13	3111.92
YARS1_HEK293T_gRNA1685	YARS1	6913.48	6771.76	7435.39	8776.26	7888.6	10023.6	11066.1	12889.8
SLC29A1_HEK293T_gRNA996	SLC29A1	7123.23	7278.85	6928.71	7387.26	7895.56	11257.3	8671.86	9699.88
gRNA_NT99	na	10364.2	11783.4	14493.9	12515.8	17129.8	20132.4	21421.7	16700.3
STK25_HEK293T_gRNA610	STK25	7595.48	7458.99	8098.6	7264.41	12257.5	7806.57	8731.45	11478.7
TUBB_HEK293T_gRNA626	TUBB	9130.87	8199.26	8069.76	7388.9	445.526	369.942	2360.48	1051.22
RPL7_HEK293T_gRNA831	RPL7	9287.89	7424.14	6891.63	9184.12	209.537	912.114	982.594	661.094
RAN_HEK293T_gRNA767	RAN	5563.86	6421.7	5942.13	5465.92	1124.26	1568.52	1755.96	1002.23
NIFK_HEK293T_gRNA817	NIFK	7992.21	6682.35	8314.86	8258.66	2139.22	3376.05	3987.98	2603.85
ELOB_HEK293T_gRNA386	ELOB	7398.91	8138.46	7756.69	6840.18	6729.54	9198.46	8279.22	7858.13
COX7A2L_HEK293T_gRNA329	COX7A2L	6839.16	8020.45	6932.83	7952.36	11381.8	13040.2	12838.6	13165.6
SF3B6_HEK293T_gRNA383	SF3B6	8883.96	8557.66	8209.82	8379.87	10586.1	9815.33	7528.37	7783.13
LSM8_HEK293T_gRNA428	LSM8	6251.85	6449.17	6807.19	4681.33	1796.03	1587.85	2149.92	1454.04
MDN1_HEK293T_gRNA4107	MDN1	7054.91	7509.38	6963.72	7277.51	3396.44	1776.78	2942.49	2518.57
TRRAP_HEK293T_gRNA3386	TRRAP	8382.95	6783.12	8174.81	7212	4157.32	1628.27	3222.56	4617.38
gRNA_NT36	na	4154.32	5409.03	4240.85	5464.28	6858.32	8704.62	4539.53	6266.18
TCP1_HEK293T_gRNA1921	TCP1	8451.27	7705.24	8209.82	9094.03	3836.4	3686.24	4470.01	2292.96
WARS1_HEK293T_gRNA1141	WARS1	7679.38	8040.71	6961.66	6910.61	9819.68	9433.08	7451.56	12863.8
SARS1_HEK293T_gRNA1586	SARS1	8662.22	7802.8	7736.1	7944.17	7525.22	8205.51	10756.9	9640.61
gRNA_NT9	na	4914.23	6735.01	7573.38	5223.5	5518.26	8683.53	10599.3	7826.68
TMEM50A_HEK293T_gRNA675	TMEM50A	4241.82	5009.35	6244.9	4635.46	5862.15	6843.49	9220.76	6223.24
RPS6_HEK293T_gRNA469	RPS6	6257.85	6097.02	4918.48	4887.71	1262.79	2542.14	801.834	1958.48
PRELID3B_HEK293T_gRNA570	PRELID3B	5055.66	4873.72	5865.92	5120.3	5984.67	6457.73	6249.14	5528.27
NUP133_HEK293T_gRNA1462	NUP133	5965.39	6589.91	5198.59	5500.31	1263.49	1338.29	832.292	768.757
COPG1_HEK293T_gRNA1168	COPG1	6706.12	7036.95	9210.82	7413.47	1528.71	1863.77	2094.97	2998.82
EIF3D_HEK293T_gRNA1495	EIF3D	9635.48	8441.16	8454.92	8913.85	2502.61	2409.46	2755.77	7010.14
RPL30_HEK293T_gRNA207	RPL30	8264.29	6897.16	8506.41	8024.43	2803.34	1606.3	3366.25	2652.24
SDF4_HEK293T_gRNA1206	SDF4	10632.7	10940.1	10238.6	8699.28	12856.2	11311.8	16044.6	10406.9
EIF4A1_HEK293T_gRNA626	EIF4A1	6537.12	6318.27	7153.21	5618.25	7934.55	7989.34	10571.5	9205.72
SF3A3_HEK293T_gRNA2453	SF3A3	8836.02	8281.85	7690.78	7542.87	1835.01	2368.16	2026.77	3215.35
MTREX_HEK293T_gRNA2354	MTREX	7605.06	7550.86	8047.11	7700.11	5456.31	5292.54	6408.05	4122.01
VCP_HEK293T_gRNA2845	VCP	8048.54	8240.37	7664.01	9416.71	6575	7574.58	5947.87	5900.86
NUP133_HEK293T_gRNA3018	NUP133	6304.59	5817.62	6961.66	5470.83	790.809	1392.77	1911.56	2473.81
SNU13_HEK293T_gRNA659	SNU13	8535.17	9167.98	8506.41	6261.97	383.57	1269.75	299.281	183.873
U2AF2_HEK293T_gRNA365	U2AF2	8321.82	9625.63	8518.77	10514.1	11626.2	14759.9	8310.34	13103.3
GARS1_HEK293T_gRNA1265	GARS1	4445.58	4331.01	4286.16	5896.7	5448.65	4881.3	6277.61	7535.15
CCT8_HEK293T_gRNA1095	CCT8	8682.6	7904.14	8389.01	8062.1	1988.16	1188.03	1384.5	3238.33
RRM1_HEK293T_gRNA397	RRM1	7069.29	6364.11	6160.45	6422.49	1602.5	1847.07	1410.33	1070.57
EIF3D_HEK293T_gRNA1844	EIF3D	10301.9	10030.4	11225.2	10266.8	5544.02	4154.6	6976.82	4800.65
YAE1_HEK293T_gRNA193	YAE1	8602.29	8355.73	7171.75	8214.44	9642.17	11426.9	9561.09	7827.89
OAZ2_HEK293T_gRNA532	OAZ2	5188.7	6566.8	6273.74	5157.98	9019.82	11177.3	9470.38	7333.13
gRNA_NT57	na	9309.46	8892.18	8963.66	7788.56	15880.9	9876.84	13476.9	9352.1
UBA52_HEK293T_gRNA402	UBA52	9647.47	8477.34	8825.66	7356.14	574.311	847.967	3165.62	1295.58
IARS1_HEK293T_gRNA900	IARS1	7093.27	5977.69	6741.28	7541.23	10455.3	6487.61	9962.34	11799.9
NUP93_HEK293T_gRNA2022	NUP93	8369.77	7439.48	7427.15	9937.58	7269.04	8425.19	6426.59	13360.4
NARS1_HEK293T_gRNA1800	NARS1	11456.1	10493.6	11429.1	11189	7421.5	6104.48	9592.87	7534.54
PAM16_HEK293T_gRNA259	PAM16	9331.04	8055.11	8691.78	7998.22	11306.6	7795.14	11779.2	8235.55
GTPBP4_HEK293T_gRNA1024	GTPBP4	8445.28	8446.46	8992.49	7362.69	11179.2	8381.25	9563.08	12263.2
RPLP0_HEK293T_gRNA411	RPLP0	5592.63	6373.77	4337.65	5942.57	565.262	1504.37	1673.85	1979.65
NUP93_HEK293T_gRNA2024	NUP93	11395	10671.4	9783.4	9826.2	9860.75	13532.3	10280.2	11449.7
CFAP298_HEK293T_gRNA1427	CFAP298	7038.13	7081.66	6306.69	6979.4	8827.69	8379.49	10227.9	9899.48
ANXA2_HEK293T_gRNA298	ANXA2	5276.2	5963.86	6263.44	4551.93	7796.02	9281.06	9771.65	7503.69
PRC1_HEK293T_gRNA507	PRC1	7252.68	7018.77	8032.69	6519.13	2668.98	1398.05	2941.16	2651.03
CCDC167_HEK293T_gRNA83	CCDC167	8281.07	7954.72	8512.59	9095.67	13891.4	8883.88	13036.6	12797.9
IARS1_HEK293T_gRNA897	IARS1	6353.73	6829.34	6943.13	6889.32	8103.01	10426.9	9054.57	8886.97
LDHB_HEK293T_gRNA286	LDHB	6668.96	6624.95	6737.16	6158.78	7108.93	6221.35	7337.01	5003.27
TUBB_HEK293T_gRNA1301	TUBB	6502.36	5191.19	5762.94	6460.17	1083.19	1953.4	1054.1	1200.62
NIFK_HEK293T_gRNA738	NIFK	6425.65	5772.35	5742.34	7428.21	8403.05	6999.9	8188.51	8831.93
TRRAP_HEK293T_gRNA9677	TRRAP	5779.61	6136.8	7909.11	8386.42	11338.6	6576.36	12658.5	11913
RPL7_HEK293T_gRNA678	RPL7	5221.07	4624.24	4788.72	4827.11	600.068	432.331	293.984	338.108
WBP2_HEK293T_gRNA356	WBP2	5405.65	6509.21	6203.71	5128.49	6709.35	12094.7	8612.93	9165.8
SLC29A1_HEK293T_gRNA964	SLC29A1	7398.91	8202.1	7493.06	8987.56	7347.7	14362.7	11101.2	12718.1
BUB1B_HEK293T_gRNA2389	BUB1B	6635.4	6917.42	6316.99	7347.95	11566.3	9639.58	6919.21	10215.2
CKB_HEK293T_gRNA1316	CKB	8076.11	7433.04	8502.29	7490.45	7983.28	10752	10533.1	10101.5
MARS1_HEK293T_gRNA518	MARS1	6259.05	6467.54	6261.38	6900.78	9468.13	13146.6	8732.11	9491.82
HADHB_HEK293T_gRNA350	HADHB	6889.51	7377.92	6284.03	6430.68	10322.3	10645.7	6584.18	4587.74
XPO1_HEK293T_gRNA2515	XPO1	8289.46	7638	7309.75	7197.25	17721.5	13733.5	9567.71	8257.33
LARS1_HEK293T_gRNA283	LARS1	5245.04	5703.97	5443.69	5703.42	3024.01	5963.89	4669.31	3811.73
SPOUT1_HEK293T_gRNA952	SPOUT1	7583.49	8622.44	8574.38	7442.95	9083.87	15478.7	14258.2	11980.1
U2AF2_HEK293T_gRNA252	U2AF2	10926.4	8860.55	9804	8484.7	15108.2	10116.7	11410.4	10723.9
ELOB_HEK293T_gRNA388	ELOB	9635.48	9126.12	7044.05	8597.72	12611.2	8324.13	6188.89	7232.72
ELOC_HEK293T_gRNA245	ELOC	10853.2	8765.45	10529	8687.81	12130.2	7924.32	12107.6	8950.48
PSMA2_HEK293T_gRNA696	PSMA2	9136.86	8001.88	8364.29	9639.47	5354.67	3454.26	6610	5144.8
WARS1_HEK293T_gRNA1140	WARS1	6026.52	7071.99	5779.42	6900.78	6565.25	12625.5	8491.1	14457
EPRS1_HEK293T_gRNA3494	EPRS1	6383.7	7028.05	7575.44	6871.3	1838.49	2934.05	4209.13	5624.44
CNPY3_HEK293T_gRNA1056	CNPY3	8370.96	7537.98	7861.74	8288.14	7342.83	10042	9800.12	10584.2
LSM8_HEK293T_gRNA389	LSM8	5387.67	5853.42	6249.02	4391.41	3870.51	3709.96	3282.82	1718.97
EIF4A1_HEK293T_gRNA946	EIF4A1	7859.17	6139.64	6121.32	5711.61	1305.25	819.848	779.322	842.548
RAN_HEK293T_gRNA574	RAN	8426.1	7739.34	7690.78	8717.29	3768.87	3974.46	3736.37	3562.53
TSG101_HEK293T_gRNA468	TSG101	5652.56	5770.27	5672.31	5924.55	5834.31	8385.64	9327.36	8440.6
gRNA_NT89	na	4952.58	5653.96	4628.06	5013.84	7553.76	10359.3	5141.4	7319.22
G6PC3_HEK293T_gRNA1198	G6PC3	7614.65	8462.19	7476.58	7343.03	8155.22	10860.1	7752.83	8853.1
STK25_HEK293T_gRNA1163	STK25	8006.59	8282.42	7688.72	7965.46	12236	7801.29	11799.1	10080.9
SRRT_HEK293T_gRNA1235	SRRT	6956.63	7504.26	6498.24	7593.64	10475.4	13872.4	9727.95	9387.78
SRRT_HEK293T_gRNA1223	SRRT	8928.31	9059.63	8524.95	8155.47	13654.7	9436.6	10273.5	11757.6
gRNA_NT44	na	8223.54	9233.33	9672.18	8388.06	18381.4	11521.8	12535.4	9615.81
RPL7_HEK293T_gRNA679	RPL7	5810.77	5771.97	4391.2	4997.46	1612.25	2325.1	2.6485	237.704
UBA52_HEK293T_gRNA359	UBA52	8862.39	8069.51	8180.98	7852.44	1412.46	1260.09	2890.84	3496
POLA1_HEK293T_gRNA2175	POLA1	8195.97	8485.3	8819.48	7256.22	7807.85	5383.93	4972.56	4757.1
TRAM1_HEK293T_gRNA546	TRAM1	5933.03	6724.21	6599.16	5954.03	7364.41	10027.1	10011.3	8058.94
SYPL1_HEK293T_gRNA442	SYPL1	10843.7	11264.5	10234.5	9023.59	11395.7	15925.1	13038.6	12156.8
SDF4_HEK293T_gRNA1201	SDF4	7744.1	7267.1	7764.93	7421.66	10630.7	9206.37	8912.21	6104.69
gRNA_NT100	na	6760.06	7387.39	7266.49	8419.18	8280.53	8475.27	9239.96	11165.4
PSMD2_HEK293T_gRNA1979	PSMD2	7177.17	7316.54	7993.55	7066.22	6317.43	5231.91	4846.1	5229.48
STK25_HEK293T_gRNA432	STK25	7850.78	7367.31	6807.19	6992.51	9307.33	9565.77	7848.17	9587.99
CWC22_HEK293T_gRNA761	CWC22	6170.35	5981.1	5637.3	6925.35	7396.43	4068.48	4505.1	6609.73
PSMD1_HEK293T_gRNA1264	PSMD1	7057.31	6935.42	6183.11	4569.95	524.886	682.767	1589.1	640.53
EIF3D_HEK293T_gRNA842	EIF3D	6251.85	6208.22	6364.36	6126.02	4918.89	4437.55	4137.62	4549.03
G6PC3_HEK293T_gRNA1180	G6PC3	6200.32	8058.52	7315.93	7600.2	10221.4	13858.3	7986.56	9883.15
gRNA_NT23	na	7059.71	8878.92	9105.77	7849.17	6575.69	14591.2	12822.1	14261
KPNB1_HEK293T_gRNA1558	KPNB1	10805.3	10388.3	11468.2	10848.3	14233.9	10720.4	14579.3	10333.2
MCM3AP_HEK293T_gRNA2371	MCM3AP	9945.91	9165.71	9589.79	9220.15	10332.7	11440.1	10989.3	9784.56
PSMB3_HEK293T_gRNA683	PSMB3	7132.82	8051.32	7655.77	6931.9	9053.24	10215.1	12001.7	11067.4
RPA1_HEK293T_gRNA281	RPA1	7068.1	7520.17	7822.6	8284.87	4403.05	4999.93	6414.01	6920.02
YJU2_HEK293T_gRNA236	YJU2	7162.78	7589.88	6432.33	7300.45	10275.6	16179	8223.6	11783.6
HNRNPU_HEK293T_gRNA1517	HNRNPU	4646.94	4197.85	4823.73	3726.39	3484.16	3304.87	3455.63	3931.49
PAM16_HEK293T_gRNA175	PAM16	9672.64	9382.22	9470.33	9668.96	14077.9	10644.8	16741.8	11595.5
PSMA2_HEK293T_gRNA245	PSMA2	4258.6	4930.54	4665.14	5791.87	4307.68	2178.35	4495.17	5179.28
HYOU1_HEK293T_gRNA1555	HYOU1	7831.6	7627.01	7433.33	6833.62	12820	11257.3	8407.01	7205.51
NARS1_HEK293T_gRNA936	NARS1	9691.81	9204.16	8609.39	8384.78	10657.8	7070.2	8206.38	8723.06
VARS1_HEK293T_gRNA1439	VARS1	6104.43	8257.23	7072.89	7125.18	3446.56	4504.33	7447.59	3543.18
YARS1_HEK293T_gRNA1219	YARS1	8433.29	7460.7	7818.48	8709.1	9695.77	10052.6	10349	6865.58
PSMB3_HEK293T_gRNA155	PSMB3	5767.62	5564.93	5923.59	5606.78	5880.25	7580.74	8634.12	5271.82
VIRMA_HEK293T_gRNA1700	VIRMA	7219.12	7553.51	7486.88	6632.15	8046.62	11747.6	9251.88	7555.71
STK25_HEK293T_gRNA1152	STK25	5463.18	5946.62	6269.62	6614.14	5516.17	9171.22	10157.7	8514.99
gRNA_NT79	na	5598.62	6548.05	5620.82	6792.67	5935.25	10738.9	8961.21	7451.68
CKAP5_HEK293T_gRNA6131	CKAP5	9749.35	7635.91	9301.44	8096.5	7003.81	6803.07	7050.31	6619.41
BUB1B_HEK293T_gRNA762	BUB1B	7618.25	7983.51	6714.5	8943.33	2405.15	3166.04	3684.73	2594.18
ELOB_HEK293T_gRNA214	ELOB	5188.7	4052.37	5528.14	4640.38	4088.4	4880.42	9007.56	6488.77
MCM3AP_HEK293T_gRNA178	MCM3AP	7710.54	7171.44	6607.4	6139.12	7942.2	9161.56	7970.67	7353.69
BUD23_HEK293T_gRNA237	BUD23	5527.91	5636.34	6562.09	6086.71	3894.88	7663.34	8909.56	6698.65
RPP21_HEK293T_gRNA450	RPP21	6527.53	6946.41	7616.64	7759.08	6841.61	9440.99	10768.8	10195.2
PDLIM1_HEK293T_gRNA323	PDLIM1	9796.09	10035.4	9812.24	11169.3	16835.3	13607	14100.6	17901.6
WBP2_HEK293T_gRNA266	WBP2	9325.04	9667.12	10817.4	8207.88	14636.9	8933.97	14873.3	12762.8
PRC1_HEK293T_gRNA1546	PRC1	7608.66	7457.1	7064.65	6304.56	7601.1	11013	7781.3	8957.74
CCT2_HEK293T_gRNA1081	CCT2	6316.58	6714.55	7336.52	7375.79	7089.44	5301.33	5976.34	8049.26
EIF3B_HEK293T_gRNA1590	EIF3B	7120.83	8002.83	9869.91	7732.87	2565.95	3138.8	3545.68	2133.28
MTREX_HEK293T_gRNA1724	MTREX	5410.44	5549.78	5239.78	5162.89	1047.68	869.056	2435.96	1500.62
RPL10_HEK293T_gRNA722	RPL10	9109.3	8949.77	8632.05	8003.14	4965.53	8459.46	8498.38	6225.66
TMEM50A_HEK293T_gRNA676	TMEM50A	4199.87	5304.66	4253.21	4943.4	7287.14	10513	5619.46	8402.49
EIF3B_HEK293T_gRNA874	EIF3B	9775.71	9326.34	9441.5	9072.73	1513.4	2737.22	4297.19	2117.56
RACK1_HEK293T_gRNA1316	RACK1	6924.26	7046.23	7182.05	7474.07	5981.89	6342.62	8283.19	10154.1
GSTK1_HEK293T_gRNA282	GSTK1	8239.12	7490.25	6673.31	8954.8	15445.1	5332.96	6108.11	10863.6
TERF2_HEK293T_gRNA619	TERF2	5119.19	5305.04	5497.24	6229.21	10451.8	6354.92	7258.88	8839.19
EPRS1_HEK293T_gRNA4178	EPRS1	7113.64	8161	7046.11	7506.83	8342.48	8331.16	7740.25	6316.99
UBA52_HEK293T_gRNA325	UBA52	7020.15	6161.62	6963.72	7465.88	2737.2	4992.02	3031.21	3747.01
PSMA2_HEK293T_gRNA361	PSMA2	7653.01	8160.43	8580.56	7272.6	5100.58	1611.58	4104.52	1980.26
CCT8_HEK293T_gRNA1745	CCT8	6986.59	6996.04	7655.77	7041.65	13024.7	9076.32	8942	9278.31
SNRNP200_HEK293T_gRNA1625	SNRNP200	8555.55	7479.64	9573.32	7121.91	689.87	5.27233	2804.1	1703.85
HAUS7_HEK293T_gRNA245	HAUS7	8303.84	7910.2	7676.37	9909.74	9342.83	8568.42	8842.69	9752.5
HAUS7_HEK293T_gRNA259	HAUS7	8810.85	8559.55	8376.65	10579.7	10079.3	5366.36	7644.9	8372.85
SF3B6_HEK293T_gRNA441	SF3B6	5152.75	4754	5921.53	5393.85	6384.25	3478.86	4633.55	4182.5
HNRNPU_HEK293T_gRNA1141	HNRNPU	7338.98	7362.76	7079.06	9726.28	9544.71	8246.81	7913.72	10865.4
RPLP1_HEK293T_gRNA382	RPLP1	10959.9	10850.1	10984.2	10484.7	14361.3	12642.2	12678.4	10301.7
EPRS1_HEK293T_gRNA2538	EPRS1	6342.95	5527.04	5594.05	6548.62	6258.25	6420.82	6169.02	7623.45
TIMM23_HEK293T_gRNA793	TIMM23	6253.05	6466.97	6352	5316.86	8162.18	7810.96	6835.12	6460.94
ITM2C_HEK293T_gRNA583	ITM2C	9845.23	9943.68	9789.58	9575.59	13388.1	15035.8	12769.1	13335
CPSF1_HEK293T_gRNA1496	CPSF1	7963.44	7791.81	7925.59	7044.92	11867	10620.2	11381.3	8775.08
CIAO2B_HEK293T_gRNA423	CIAO2B	7590.68	7467.89	6741.28	9043.25	12125.3	8614.99	9659.09	14855.6
WDR75_HEK293T_gRNA854	WDR75	7346.17	6002.69	7618.7	6979.4	689.174	526.355	4325.67	1088.72
gRNA_NT98	na	6402.88	7398.56	6261.38	7565.8	7702.73	10601.8	8458.65	12241.4
CCDC167_HEK293T_gRNA275	CCDC167	7446.85	6902.46	6562.09	7826.24	5490.42	7689.7	8244.12	8676.49
ARPC5L_HEK293T_gRNA1617	ARPC5L	4651.73	4674.25	4471.53	5580.57	7166.01	7723.97	5171.2	6635.74
TRAP1_HEK293T_gRNA1136	TRAP1	5706.5	6160.48	5215.07	7125.18	8929.32	11242.4	6445.13	11762.4
gRNA_NT70	na	4009.29	4812.72	4308.82	3683.8	7025.39	7805.69	5720.1	4033.1
gRNA_NT53	na	8649.04	10748.4	10306.6	9010.49	12936.3	18140.3	12540	14528.4
DYNC1H1_HEK293T_gRNA2894	DYNC1H1	7251.48	7620.95	7066.71	9514.99	5643.57	8942.75	6560.34	8790.2
RACK1_HEK293T_gRNA726	RACK1	10335.5	7730.63	8269.55	8881.09	493.56	781.184	2340.61	2592.36
gRNA_NT91	na	5711.29	6668.33	5824.73	7231.65	8686.37	10028	8472.56	11380.1
ANXA2_HEK293T_gRNA301	ANXA2	6286.61	6826.5	7929.71	5565.83	5415.23	6719.59	11599.1	3998.62
RRM1_HEK293T_gRNA2284	RRM1	12374.3	11000.1	11680.4	8597.72	8695.42	10123.8	10386.8	7965.79
CCT2_HEK293T_gRNA591	CCT2	10551.2	9548.35	9482.69	9442.92	9967.26	10193.2	10203.4	9684.16
EPRS1_HEK293T_gRNA3496	EPRS1	6067.27	8650.85	6588.86	9090.75	6253.38	15700.1	8499.04	12272.9
EIF1AX_HEK293T_gRNA489	EIF1AX	6289.01	7197.96	6080.13	7655.89	9880.94	11772.2	10688.7	8289.99
XPO1_HEK293T_gRNA3397	XPO1	8492.02	8189.41	8038.87	7647.7	9372.07	4165.14	4027.05	5277.26
PDLIM1_HEK293T_gRNA475	PDLIM1	5626.19	6961.56	5540.5	6289.82	7612.24	10536.8	6725.21	8531.93
MTREX_HEK293T_gRNA689	MTREX	9094.91	9608.59	8949.24	9587.06	12721.2	9504.26	9027.42	9226.29
CCT7_HEK293T_gRNA1246	CCT7	7126.83	6886.55	8345.76	8517.46	7131.21	4735.43	10600	8841
gRNA_NT71	na	3251.78	4461.53	3865.99	4863.14	2907.76	6422.58	6362.36	6116.18
RPL17_HEK293T_gRNA133	RPL17	9164.43	8956.02	8504.35	9064.54	3405.49	2481.51	2398.22	5160.53
HYOU1_HEK293T_gRNA691	HYOU1	8173.2	8152.66	6733.04	8910.57	8558.98	13034.1	8017.02	12531.2
XPO1_HEK293T_gRNA1398	XPO1	5823.96	5866.49	6076.01	6284.9	1974.94	622.135	1179.91	383.471
TUBA1B_HEK293T_gRNA231	TUBA1B	7935.88	7617.16	7921.47	6024.47	6013.91	6001.67	6674.23	4989.36
DDX47_HEK293T_gRNA684	DDX47	7255.08	6169.38	6757.76	5816.44	7869.11	4716.1	6709.98	8461.77
MDN1_HEK293T_gRNA1981	MDN1	5291.78	4695.66	4479.77	5690.32	895.926	1282.06	910.423	1146.78
ITM2C_HEK293T_gRNA515	ITM2C	8182.79	8005.67	7723.74	6201.37	10009.7	12315.3	9315.44	9302.5
LARS1_HEK293T_gRNA285	LARS1	6326.17	6136.24	7491	6745.17	5003.12	5764.42	8851.96	9271.65
SMU1_HEK293T_gRNA307	SMU1	9933.93	8104.55	8644.41	8578.07	2044.55	1842.68	2367.1	659.28
HAUS7_HEK293T_gRNA1057	HAUS7	6785.23	6751.49	6030.7	6212.83	6492.85	8501.64	9202.88	9483.95
HMG20B_HEK293T_gRNA370	HMG20B	7093.27	5806.64	6240.78	7560.88	11164.6	9419.02	8708.94	7653.09
RPS6_HEK293T_gRNA111	RPS6	6903.89	6196.28	5126.5	5842.65	1994.43	2660.77	1885.07	1937.92
CKB_HEK293T_gRNA567	CKB	6467.6	7121.62	7756.69	6388.1	9403.39	9605.31	9227.38	8659.55
EFTUD2_HEK293T_gRNA611	EFTUD2	8942.69	9302.1	10751.4	8630.48	8550.63	8781.07	11005.2	7661.56
RPA1_HEK293T_gRNA334	RPA1	5253.43	5411.12	7015.21	5670.66	690.566	308.431	1209.7	800.813
DCTN2_HEK293T_gRNA420	DCTN2	6299.8	6588.96	6341.7	5447.9	5143.05	7264.4	6447.78	5888.76
COPA_HEK293T_gRNA3781	COPA	8711.36	8049.05	9237.59	7637.87	3024.01	3705.57	4346.85	3552.25
EIF1AX_HEK293T_gRNA493	EIF1AX	9265.11	9299.25	8700.02	9818.01	2902.19	5796.05	4574.63	6329.09
MCM3AP_HEK293T_gRNA1439	MCM3AP	8343.4	7758.28	9041.92	7018.72	8737.89	9247.67	11755.4	10933.2
DCTN2_HEK293T_gRNA1190	DCTN2	5469.17	6992.82	6362.3	4904.09	9647.74	9743.27	7738.26	6231.1
EMP3_HEK293T_gRNA335	EMP3	6912.28	7580.6	6049.23	7451.14	7765.39	9687.91	5129.49	7547.24
SPOUT1_HEK293T_gRNA1066	SPOUT1	7629.04	8217.26	8720.62	7891.75	8130.86	5311	9169.78	6603.08
TERF2_HEK293T_gRNA575	TERF2	7603.87	6749.97	6685.67	7628.04	10240.1	8480.55	6243.18	9956.34
gRNA_NT83	na	4925.01	5482.53	5223.31	5131.77	4485.2	5972.67	7607.82	4862.34
RPL10_HEK293T_gRNA825	RPL10	7445.65	6115.21	6438.51	6750.09	1743.12	755.701	1534.14	1235.09
ELOC_HEK293T_gRNA410	ELOC	9436.51	8456.5	10358	9524.81	9618.5	6784.61	8559.96	9859.56
NUP133_HEK293T_gRNA1354	NUP133	7348.57	7587.61	6846.32	8442.11	3198.04	2673.07	3287.45	3036.92
U2AF2_HEK293T_gRNA1253	U2AF2	10348.6	8248.51	9915.22	7644.42	2705.18	1527.22	3176.88	853.435
BOP1_HEK293T_gRNA125	BOP1	9912.35	8057.57	10829.7	10918.7	8320.9	8981.42	11180	8104.3
TUBB_HEK293T_gRNA893	TUBB	7303.02	8445.14	8597.04	7413.47	8145.48	8062.28	10558.3	5603.27
COPA_HEK293T_gRNA1867	COPA	7078.88	7088.29	7696.96	6748.45	6702.39	6546.48	5752.55	3140.35
COX7A2L_HEK293T_gRNA188	COX7A2L	9551.58	9294.71	9309.68	10165.3	13921.3	8529.76	10504.6	10911.4
CKAP5_HEK293T_gRNA3073	CKAP5	7177.17	8008.89	7130.56	7868.82	7019.13	8751.19	6492.14	9000.68
PPP3R1_HEK293T_gRNA436	PPP3R1	8301.45	9211.36	7756.69	9085.84	11100.6	12839	8302.39	12663.6
VARS1_HEK293T_gRNA2024	VARS1	8891.15	8445.14	8226.3	7162.86	9404.09	11600	10044.4	5859.73
COPA_HEK293T_gRNA3211	COPA	7160.39	7293.81	7202.64	7248.03	2967.62	3513.13	2353.86	2012.92
POLA1_HEK293T_gRNA746	POLA1	7806.43	6673.26	6533.25	7850.81	2249.21	1707.36	2141.98	3373.21
ARCN1_HEK293T_gRNA359	ARCN1	5434.42	6033.57	5493.12	4807.45	3123.56	4476.21	4761.34	3581.28
gRNA_NT45	na	6139.19	6196.09	6113.08	5651.01	10717	6037.7	8736.75	8457.53
GSTK1_HEK293T_gRNA728	GSTK1	7718.93	7912.28	9163.44	8022.79	7877.46	9335.54	14326.4	9957.55
GSTK1_HEK293T_gRNA489	GSTK1	12733.8	11510.8	10945.1	11349.5	15268.3	13064.8	14795.9	16333.2
RPL17_HEK293T_gRNA270	RPL17	8803.66	5958.74	6601.22	7524.85	670.378	1774.14	2216.8	1878.65
CDC16_HEK293T_gRNA800	CDC16	7466.03	8036.93	7565.14	8293.06	12847.2	7158.07	9133.36	10998.5
SNRPD2_HEK293T_gRNA758	SNRPD2	9458.09	8352.7	8879.21	8846.69	14934.9	9050.84	12525.4	13765.6
PRELID3B_HEK293T_gRNA645	PRELID3B	8130.05	8714.88	8481.69	6761.55	12045.9	7711.67	10781.4	8516.2
DYNC1H1_HEK293T_gRNA10775	DYNC1H1	7371.34	8069.89	7600.16	7816.41	1849.63	5771.45	2501.51	3105.27
GMPPB_HEK293T_gRNA275	GMPPB	8022.17	7123.14	9390.01	7415.1	9988.84	7498.14	11276.7	10477.7
SLC29A1_HEK293T_gRNA587	SLC29A1	6203.91	6375.1	6053.35	5388.93	7484.84	11895.3	8651.99	7767.41
SDF4_HEK293T_gRNA357	SDF4	7921.49	7655.23	7898.81	7829.51	9702.73	10450.6	10510.6	12141
gRNA_NT68	na	5979.77	7751.46	6640.36	7654.25	12229	13232.7	7691.25	11082
CWC22_HEK293T_gRNA443	CWC22	8090.49	7925.92	7433.33	7803.3	1961.71	1322.48	1095.82	2571.19
gRNA_NT66	na	8571.13	9439.05	9750.45	9876.98	8739.28	16677.3	16048.6	12992.7
RNF167_HEK293T_gRNA1285	RNF167	5331.34	5447.49	5101.79	5187.46	7331	7200.25	7902.47	4259.92
BUB1B_HEK293T_gRNA666	BUB1B	5916.25	5191.19	6967.84	6001.53	4856.93	7577.22	8122.96	5556.1
DARS1_HEK293T_gRNA1018	DARS1	6802.01	5856.45	5797.95	7431.48	3648.44	4051.79	4358.11	4363.34
CSE1L_HEK293T_gRNA1952	CSE1L	6740.88	5859.67	7198.52	6211.19	678.732	53.602	520.431	1163.11
ELOC_HEK293T_gRNA471	ELOC	5813.17	6143.24	6644.47	7230.01	6306.98	6440.15	8769.85	9523.87
HNRNPU_HEK293T_gRNA1257	HNRNPU	5629.79	5830.12	5721.75	5318.5	3035.84	2559.72	3522.51	2351.03
KARS1_HEK293T_gRNA341	KARS1	9878.79	9640.79	8829.78	9254.55	8830.47	7320.63	8049.46	6833.53
MCM3AP_HEK293T_gRNA2505	MCM3AP	8301.45	7701.64	5754.7	8789.36	5958.22	8194.08	8388.47	11285.2
PSMD2_HEK293T_gRNA924	PSMD2	6851.15	7029.37	6345.82	6040.85	1266.97	1490.31	2910.7	1239.33
MLEC_HEK293T_gRNA732	MLEC	8865.98	8883.85	9595.97	9076.01	7797.41	9162.44	9512.76	8188.98
PSAP_HEK293T_gRNA1101	PSAP	4607.39	5017.87	4650.72	5246.43	5268.35	7926.07	6646.42	6782.72
MDN1_HEK293T_gRNA5656	MDN1	7045.32	5507.53	5703.21	6250.51	994.081	1369.93	1456.68	1801.23
SF3B6_HEK293T_gRNA303	SF3B6	7877.15	8050.75	7606.34	7236.57	11565.6	12483.1	9799.46	10255.7
TUBB_HEK293T_gRNA317	TUBB	6676.16	5617.4	5973.02	5424.97	1207.1	1216.15	1534.14	1116.54
BUD23_HEK293T_gRNA279	BUD23	7251.48	8015.9	7666.07	7241.48	6283.31	10933.9	10623.1	6414.97
HDDC2_HEK293T_gRNA195	HDDC2	6235.07	6780.85	6094.54	5829.55	9660.96	10869.8	9478.33	6303.08
gRNA_NT50	na	4577.42	6081.11	6071.89	4489.68	7852.4	11281	9157.86	6611.55
KPNB1_HEK293T_gRNA1555	KPNB1	14559.3	10449.3	11138.7	10240.6	11844	7902.35	7297.29	6717.4
RPS11_HEK293T_gRNA331	RPS11	8587.91	7680.24	6617.7	6514.22	9395.04	5825.93	6031.96	7567.2
RPA1_HEK293T_gRNA236	RPA1	9452.09	8688.55	9649.52	10139.1	2222.76	1005.26	1527.52	2484.7
NEDD8_HEK293T_gRNA322	NEDD8	11380.6	9549.3	9684.54	9431.45	10595.9	9127.29	10878.1	10858.2
gRNA_NT35	na	6738.48	7664.14	5806.19	6666.55	6554.81	8484.06	5973.03	7474.66
ARPC5L_HEK293T_gRNA1622	ARPC5L	8180.39	8816.6	7734.04	7796.75	14364.7	10893.5	8826.13	9331.53
NIFK_HEK293T_gRNA330	NIFK	4732.04	4779	5643.48	4599.43	2893.14	1345.32	2324.06	2820.39
GMPPB_HEK293T_gRNA552	GMPPB	7529.55	7658.45	7766.99	7924.51	14268.7	12854.8	9325.38	9556.53
PDLIM1_HEK293T_gRNA1023	PDLIM1	4229.83	4831.1	4702.21	5436.43	4794.98	5363.72	5054	8763.58
RPL30_HEK293T_gRNA248	RPL30	4833.92	5997.58	4669.26	4773.05	5072.74	8858.4	6823.2	7485.55
DDX23_HEK293T_gRNA2424	DDX23	6943.44	7137.16	7876.15	8835.23	6625.81	9365.42	12658.5	9332.74
TRAP1_HEK293T_gRNA1385	TRAP1	6022.92	6220.53	5379.84	6266.89	8027.83	7022.75	6114.07	12832.4
CNOT3_HEK293T_gRNA1010	CNOT3	7975.43	6847.91	7056.41	7528.12	7443.77	5543.86	8155.4	11058.4
SNRPD2_HEK293T_gRNA624	SNRPD2	5823.96	5751.13	4998.8	5190.74	4124.6	10855.7	4699.77	7107.52
RPP21_HEK293T_gRNA136	RPP21	6359.73	7103.63	6422.03	6696.03	8132.25	6471.79	8489.11	6159.73
CCT2_HEK293T_gRNA960	CCT2	7120.83	6466.78	6440.57	7369.24	3721.54	4108.03	4822.26	3457.89
TRAM1_HEK293T_gRNA745	TRAM1	7082.48	7043.39	6984.32	6196.45	9870.5	7599.19	6422.62	6508.73
NIFK_HEK293T_gRNA328	NIFK	7481.61	8176.72	8568.2	7485.54	6364.76	2413.85	5295.68	5116.98
DDX23_HEK293T_gRNA1364	DDX23	8717.36	8651.8	8067.7	9208.69	7008.69	7488.47	5958.47	7324.66
KARS1_HEK293T_gRNA903	KARS1	6145.18	6326.61	5145.04	5885.24	3427.77	1802.26	2950.43	2159.9
POLA1_HEK293T_gRNA4232	POLA1	6296.2	7301.77	7497.18	6040.85	1076.92	1939.34	570.09	2344.37
ELOB_HEK293T_gRNA178	ELOB	6902.69	6434.01	7744.34	6350.42	9132.6	5793.41	10060.3	6930.3
NUP93_HEK293T_gRNA1517	NUP93	7931.08	5856.26	7509.53	6899.14	2696.83	131.808	293.322	2716.35
CDC5L_HEK293T_gRNA1293	CDC5L	5683.72	6331.34	7280.91	5562.56	1017.05	630.044	2810.06	1144.36
INTS11_HEK293T_gRNA520	INTS11	7831.6	7491.95	7744.34	9208.69	7196.64	7201.13	8651.33	7349.46
INTS11_HEK293T_gRNA646	INTS11	10198.8	10539	9503.29	7549.42	15779.3	8886.52	9178.38	5191.98
U2AF2_HEK293T_gRNA1254	U2AF2	11650.3	9482.62	9750.45	11580.5	10211.6	4756.52	7596.57	8626.89
PAM16_HEK293T_gRNA169	PAM16	7697.36	7520.93	8279.85	7139.93	7781.4	11237.1	12446.6	8626.28
LARS1_HEK293T_gRNA1585	LARS1	8605.89	8823.23	9742.21	7980.21	3035.84	3483.25	3531.12	4582.3
U2AF2_HEK293T_gRNA1167	U2AF2	8924.71	7944.49	6957.54	7200.53	11573.2	7279.33	5346	8556.73
RPLP0_HEK293T_gRNA823	RPLP0	7141.21	7226.19	7742.28	6304.56	2948.83	2196.81	2809.4	3916.36
gRNA_NT22	na	5200.69	6382.11	5727.92	4573.22	10120.4	6267.92	7399.25	6968.41
KARS1_HEK293T_gRNA1259	KARS1	7961.05	7577.19	7000.8	6615.77	7457.69	6519.24	5567.15	4638.55
KARS1_HEK293T_gRNA901	KARS1	6497.57	7004.18	7544.55	7881.93	6008.34	7064.93	3968.78	5815.57
HADHB_HEK293T_gRNA345	HADHB	9448.5	8167.44	8197.46	8361.85	8915.4	8831.16	11236.9	8599.07
SNRPD2_HEK293T_gRNA621	SNRPD2	7690.16	7102.68	8012.09	7212	6447.6	4363.73	4358.11	5292.99
EIF3B_HEK293T_gRNA2082	EIF3B	10149.7	8610.51	9319.98	8224.26	3958.22	3040.38	5238.74	3060.51
PRPF8_HEK293T_gRNA5343	PRPF8	5590.23	5231.73	4669.26	5357.81	449.703	1049.19	642.262	119.759
WDR75_HEK293T_gRNA567	WDR75	7480.41	6507.51	7161.45	6705.86	1156.98	1219.67	892.545	1399.61
SF3B1_HEK293T_gRNA1902	SF3B1	6917.07	7005.89	6430.27	5282.46	290.984	98.4169	1062.71	277.623
HADHB_HEK293T_gRNA349	HADHB	5682.52	4948.54	5482.82	5307.03	4784.54	9579.83	9168.45	8026.88
RUVBL2_HEK293T_gRNA867	RUVBL2	7885.54	6208.97	7285.03	7000.7	9855.88	8133.45	9838.52	6303.68
ARCN1_HEK293T_gRNA950	ARCN1	8444.08	8138.65	8533.19	9644.39	214.41	1296.99	656.828	1981.47
AARS1_HEK293T_gRNA1883	AARS1	8760.51	7812.46	6481.76	7031.82	9134.68	9165.95	4640.84	7539.38
DARS1_HEK293T_gRNA1524	DARS1	7672.19	7779.69	7701.08	6219.38	6690.55	8107.97	6443.14	4422.01
SNU13_HEK293T_gRNA318	SNU13	5977.38	7226.94	5837.09	5262.81	8290.97	9464.72	7227.76	9850.49
MLEC_HEK293T_gRNA873	MLEC	8452.47	9019.1	7311.81	9326.62	11799.5	10197.6	9094.96	12760.4
RPL7_HEK293T_gRNA680	RPL7	6756.46	5899.08	5637.3	5485.57	1809.95	431.453	311.861	3347.21
CKB_HEK293T_gRNA1415	CKB	12465.4	9438.29	11140.7	8501.08	12075.9	16225.6	13849.7	12645.5
SNRNP200_HEK293T_gRNA4100	SNRNP200	8607.09	8314.24	7863.8	7112.08	95.3705	186.289	1205.07	907.871
YARS1_HEK293T_gRNA1205	YARS1	4619.37	4655.88	5112.09	5698.51	5954.74	8527.12	8511.62	6410.74
DDX27_HEK293T_gRNA1291	DDX27	8025.77	8899.76	8920.4	9421.62	14306.3	12281	13198.1	12496.7
EIF1AX_HEK293T_gRNA498	EIF1AX	5515.92	5828.8	6947.25	6815.61	6577.78	7845.23	9725.3	7879.91
COPA_HEK293T_gRNA3689	COPA	5982.17	5505.83	6440.57	5171.08	54.2985	131.808	7.28338	1031.86
LDHB_HEK293T_gRNA934	LDHB	8236.72	8633.05	7622.82	6569.91	9525.91	11025.3	9997.43	4023.42
SRRT_HEK293T_gRNA1098	SRRT	10811.3	10025.1	8483.75	10060.4	5570.47	5813.63	4842.79	5362.55
RPL10_HEK293T_gRNA617	RPL10	6067.27	6343.66	7165.57	5449.54	739.295	1086.98	1107.07	1503.64
RPLP0_HEK293T_gRNA875	RPLP0	8158.81	7865.5	7091.42	7706.66	1277.41	648.497	789.254	1302.23
RAN_HEK293T_gRNA848	RAN	8568.73	7379.81	7414.79	7456.05	641.836	1318.96	3480.13	1434.08
PSMD2_HEK293T_gRNA2056	PSMD2	10093.3	9427.68	7676.37	9246.36	1092.93	2210.86	1883.75	1414.13
ARPC5L_HEK293T_gRNA1322	ARPC5L	9491.65	6843.74	8310.74	6361.89	7543.32	10541.2	7918.36	8234.34
RPS11_HEK293T_gRNA349	RPS11	8809.65	8818.87	9830.77	8474.87	8939.07	10011.3	11338.9	8393.42
RPLP2_HEK293T_gRNA713	RPLP2	7507.98	7332.64	7128.5	7223.46	1269.75	2194.17	2725.97	3104.06
CNOT3_HEK293T_gRNA2187	CNOT3	10056.2	9754.25	8450.8	10008	13259.3	14563.1	6753.02	11942
TERF2_HEK293T_gRNA1586	TERF2	6132	7045.66	6300.51	5595.32	11469.5	12954.1	7138.37	5831.9
SFPQ_HEK293T_gRNA1386	SFPQ	7210.73	6252.92	6547.67	4990.9	338.322	1152	1069.33	1803.04
DCTN2_HEK293T_gRNA628	DCTN2	6755.26	6502.39	7163.51	8297.97	7265.56	6201.14	8193.8	9642.42
gRNA_NT43	na	4539.07	5502.42	4963.79	4732.1	6858.32	7875.11	6631.85	8612.37
VIRMA_HEK293T_gRNA4784	VIRMA	4359.28	3803.47	4626	4252.18	3963.79	5311.88	5063.27	5003.27
CCT2_HEK293T_gRNA255	CCT2	6579.07	6552.4	7019.33	5986.79	7475.79	5811.87	7849.5	6600.06
DDX23_HEK293T_gRNA1564	DDX23	7030.94	7204.59	7165.57	6558.44	8678.02	6447.18	8133.55	7316.19
ITM2C_HEK293T_gRNA413	ITM2C	9339.43	9899.54	9874.03	8820.49	11609.4	16284.5	14082.7	12632.8
gRNA_NT49	na	5430.82	5127.17	5017.34	5950.76	5047.67	7441.9	8773.82	8928.1
COX7A2L_HEK293T_gRNA149	COX7A2L	3866.66	4473.65	4566.27	4142.43	7084.57	6439.28	7390.64	6050.86
PPP3R1_HEK293T_gRNA520	PPP3R1	6115.22	7162.92	5843.27	6678.02	8336.91	9065.78	4952.04	7400.87
HMGB2_HEK293T_gRNA1076	HMGB2	8384.15	7456.15	8166.57	7819.68	11358.1	10166.8	11792.5	12689
COPG1_HEK293T_gRNA403	COPG1	6058.88	7466.76	7476.58	6987.59	2453.18	4360.22	3601.96	3209.91
SF3B1_HEK293T_gRNA3061	SF3B1	8107.27	8083.9	8065.64	7778.73	3159.76	2201.2	3053.06	2340.75
PSMD1_HEK293T_gRNA2815	PSMD1	7309.01	7070.48	7686.66	5506.87	613.295	541.293	593.927	5753.28
MLEC_HEK293T_gRNA745	MLEC	4744.03	5423.05	4636.3	5778.77	5370.68	7410.26	6711.97	8448.46
gRNA_NT92	na	6257.85	7864.74	5857.68	8474.87	11515.5	12407.6	8734.76	11250.7
gRNA_NT56	na	7585.89	8120.84	7501.3	7709.94	12405.1	10350.5	8789.05	11824.1
ANXA2_HEK293T_gRNA304	ANXA2	8128.85	7927.63	5874.16	6679.65	4613.29	3383.96	2772.32	1769.77
HYOU1_HEK293T_gRNA369	HYOU1	11580.8	10457.4	10141.8	8982.65	17831.5	11658.9	9834.55	7470.43
CPSF1_HEK293T_gRNA1684	CPSF1	7002.17	6824.42	7639.29	7382.35	8019.48	8010.43	8644.71	8467.21
SMU1_HEK293T_gRNA564	SMU1	10642.3	10036.5	11700.9	11664	8558.28	5774.96	11274	8672.86
CKAP5_HEK293T_gRNA1892	CKAP5	7602.67	7261.04	5981.26	6930.26	2286.11	314.583	828.319	404.036
RACK1_HEK293T_gRNA574	RACK1	7961.05	5847.36	6051.29	5913.08	345.979	1557.97	1370.6	2650.43
gRNA_NT2	na	5922.24	7064.04	7931.76	6908.97	6627.9	10282.8	11889.1	10967
CDC5L_HEK293T_gRNA1001	CDC5L	3791.15	4627.84	4012.22	4727.19	5025.4	8742.41	6089.57	6062.35
PPP3R1_HEK293T_gRNA667	PPP3R1	5785.6	5143.27	5653.78	4471.67	7161.14	5900.62	5634.69	4692.98
ELOC_HEK293T_gRNA474	ELOC	7522.36	8438.7	7359.18	6995.78	8466.39	10229.2	9041.32	9252.9
PSMD2_HEK293T_gRNA2026	PSMD2	10798.1	9122.14	9297.32	8753.33	1796.03	1383.11	1218.31	1503.04
LSM7_HEK293T_gRNA233	LSM7	7251.48	7410.12	7447.74	7420.02	2884.78	3577.28	3974.08	1428.04
EIF3B_HEK293T_gRNA961	EIF3B	10059.8	10336.9	10695.8	9690.25	1799.51	5598.34	1559.97	2840.95
LSM8_HEK293T_gRNA248	LSM8	5224.66	5092.12	5359.24	5747.65	10822.8	7975.28	6944.37	9396.85
ANXA2_HEK293T_gRNA310	ANXA2	6489.18	6369.8	5587.87	6049.04	879.915	2164.29	1505.67	1529.65
MAT2A_HEK293T_gRNA812	MAT2A	8427.3	8247.38	8757.69	7734.51	5419.41	2481.51	4023.07	3792.98
TMEM50A_HEK293T_gRNA723	TMEM50A	4250.21	4799.27	5258.32	4468.39	6478.93	6622.05	7756.8	5391.58
HYOU1_HEK293T_gRNA1582	HYOU1	6423.25	6897.53	7219.12	6863.11	3273.92	4896.24	4703.74	3779.67
gRNA_NT12	na	5916.25	5618.73	5923.59	7282.43	8926.54	10238.9	6729.84	10797.7
TMEM50A_HEK293T_gRNA630	TMEM50A	5788	5981.1	4974.09	5908.17	8914.7	6379.52	5144.72	8523.46
CFAP298_HEK293T_gRNA1178	CFAP298	7980.22	7083.74	6393.2	8283.23	7020.52	7738.03	7517.11	12635.2
LSM7_HEK293T_gRNA108	LSM7	5690.91	6539.52	6852.5	7082.6	9104.75	9912.86	9913.34	11400.1
RNF167_HEK293T_gRNA892	RNF167	5960.6	6817.6	5767.06	5888.51	9302.45	11209	6966.22	5533.11
gRNA_NT58	na	9573.15	10295.3	8716.5	7736.15	9721.53	15635.1	11623.6	8124.87
gRNA_NT19	na	7379.73	7549.16	6801.01	6623.96	9183.41	10721.3	6995.36	6020.01
EIF1AX_HEK293T_gRNA336	EIF1AX	9925.54	9449.66	9777.22	9251.27	6671.06	4626.47	4011.16	2906.27
CCT7_HEK293T_gRNA241	CCT7	3803.13	3842.3	4778.42	4915.56	1899.75	1025.47	3115.96	3263.13
UBA52_HEK293T_gRNA324	UBA52	7050.12	6887.31	5639.36	6080.16	2999.65	2216.14	1327.56	1632.47
RUVBL2_HEK293T_gRNA1698	RUVBL2	5537.49	5806.64	6873.1	5877.05	6485.19	6047.37	8502.35	8479.91
IARS1_HEK293T_gRNA3619	IARS1	6408.87	5800.57	5940.07	4933.58	2529.06	2679.22	2573.02	2590.55
TIMM23_HEK293T_gRNA532	TIMM23	9384.97	8156.26	9289.08	8646.86	5174.37	6492.88	8293.78	4350.04
SRRT_HEK293T_gRNA644	SRRT	8289.46	7242.48	7276.79	8008.05	5273.92	9395.3	11029.7	10084.6
EIF3B_HEK293T_gRNA876	EIF3B	8164.81	7437.96	7002.86	7634.59	2847.19	1870.8	2335.32	1599.81
OAZ2_HEK293T_gRNA522	OAZ2	7705.75	7571.13	7587.8	7156.3	8093.96	13564	12832	10181.3
CSE1L_HEK293T_gRNA981	CSE1L	8798.86	8788.56	8516.71	8288.14	1939.43	961.322	2479.66	1544.77
NEDD8_HEK293T_gRNA306	NEDD8	6326.17	7131.47	8296.33	6609.22	7082.48	7321.51	9209.5	7231.51
WBP2_HEK293T_gRNA542	WBP2	8008.99	8156.83	9752.51	9362.65	13982.6	10632.5	14205.9	12355.8
TCP1_HEK293T_gRNA1835	TCP1	6743.28	5678.21	6218.12	6302.92	3260	2745.13	5155.97	3114.34
CIAO2B_HEK293T_gRNA245	CIAO2B	6190.73	6347.25	6098.66	7329.93	8665.49	10249.4	7444.28	10252.1
RPL17_HEK293T_gRNA132	RPL17	8837.22	7570.37	7241.78	7377.43	2000.69	1056.22	291.335	660.49
LDHB_HEK293T_gRNA707	LDHB	4161.51	4127.19	5402.5	4840.21	6448.99	4284.65	12521.5	6471.22
PPP3R1_HEK293T_gRNA901	PPP3R1	8981.05	8875.51	8174.81	7731.23	9155.57	9120.26	8238.83	8175.07
CCDC167_HEK293T_gRNA70	CCDC167	7667.39	6851.88	6660.95	7821.32	6558.98	7754.72	6719.91	9565.61
SBNO1_HEK293T_gRNA3621	SBNO1	6780.43	6598.81	6683.61	7213.63	12215.1	7366.33	8769.85	7846.04
AQR_HEK293T_gRNA2246	AQR	9218.37	9930.99	9186.1	10430.6	5754.95	5239.82	5014.28	7142
AARS1_HEK293T_gRNA2222	AARS1	5187.51	4593.94	5425.15	5922.91	5899.05	7691.45	6751.03	5498.64
UFD1_HEK293T_gRNA989	UFD1	8584.31	8438.7	7317.98	8707.47	9917.14	10662.4	9279.69	9719.84
gRNA_NT32	na	3184.66	3752.51	3503.49	4262.01	4128.08	8731.86	6277.61	7256.31
ARPC5L_HEK293T_gRNA1619	ARPC5L	6175.14	6788.99	6506.48	6320.94	11176.4	8948.91	7989.87	10437.8
HAUS7_HEK293T_gRNA904	HAUS7	8702.97	7272.22	7659.89	6828.71	10281.2	11220.4	6794.07	9927.3
gRNA_NT33	na	7596.67	8001.88	8640.29	8356.94	9463.26	9861.9	14250.3	10181.9
HNRNPU_HEK293T_gRNA2545	HNRNPU	6931.46	6908.33	6185.17	6648.53	5617.81	5404.14	4762.01	3742.17
SNU13_HEK293T_gRNA503	SNU13	6605.44	7108.55	6782.47	8766.43	3007.3	3312.78	6325.95	3523.82
RRM1_HEK293T_gRNA1333	RRM1	7066.9	7105.33	5760.88	5773.86	746.257	3463.04	259.553	5.4436
TSG101_HEK293T_gRNA630	TSG101	5826.35	6166.73	6819.55	6106.36	7337.26	4887.45	8774.49	8355.31
PSMD2_HEK293T_gRNA949	PSMD2	7776.46	7837.65	8026.51	7673.9	9891.38	6372.49	8957.23	7835.75
COPB1_HEK293T_gRNA1085	COPB1	11703	8990.68	9309.68	9886.81	1050.47	1704.72	1675.84	1702.03
CCT2_HEK293T_gRNA1737	CCT2	7047.72	6482.13	7935.88	7516.66	6849.97	4803.09	8678.48	8714.59
gRNA_NT69	na	6407.67	7188.11	7447.74	7803.3	9503.64	11781	9188.98	8919.63
CDC5L_HEK293T_gRNA2127	CDC5L	7306.62	7932.36	7270.61	8334.01	1079.01	631.801	1332.86	458.472
SLC35B1_HEK293T_gRNA1141	SLC35B1	5102.41	5394.64	5182.11	5886.88	5853.8	5709.06	3031.87	3628.46
G6PC3_HEK293T_gRNA767	G6PC3	9912.35	8303.45	8862.73	9564.13	9466.04	7767.02	11578.6	14392.3
CIAO2B_HEK293T_gRNA214	CIAO2B	6515.54	7317.87	5353.07	6910.61	8229.01	11310.9	3550.32	10377.3
PRPF8_HEK293T_gRNA3114	PRPF8	7425.28	6919.89	6290.21	5713.25	4903.57	1236.36	646.897	714.925
gRNA_NT81	na	6154.77	6552.21	6160.45	6736.98	7578.13	6648.41	9034.7	11408.6
PDLIM1_HEK293T_gRNA863	PDLIM1	9525.21	9601.77	9886.39	9514.99	15554.4	16127.2	8948.63	11665.6
SARS1_HEK293T_gRNA194	SARS1	8398.53	8407.06	7544.55	5551.09	9246.07	8859.28	8414.95	8706.12
EMP3_HEK293T_gRNA509	EMP3	10383.4	9300.2	10475.4	11873.7	8730.23	11510.4	10852.9	13332.6
GMPPB_HEK293T_gRNA1193	GMPPB	9864.41	8663.54	9443.56	9541.19	11247.5	12197.5	13006.1	10574.5
RPA1_HEK293T_gRNA830	RPA1	7573.9	8558.22	8075.94	8882.73	7519.65	7926.95	8157.39	8446.65
RUVBL2_HEK293T_gRNA594	RUVBL2	8442.88	8332.24	7334.46	8476.51	11612.9	9949.77	9761.72	8444.83
PSAP_HEK293T_gRNA778	PSAP	5832.35	6245.72	8374.59	5934.38	6593.79	6191.48	10002.7	4910.73
HMGB2_HEK293T_gRNA933	HMGB2	8825.23	9027.24	7880.27	7921.24	10813.8	8220.45	10365.6	7821.84
PSAP_HEK293T_gRNA1186	PSAP	5610.61	5849.82	7256.2	5121.94	8185.85	8681.77	9451.18	7550.27
PDLIM1_HEK293T_gRNA996	PDLIM1	4513.9	5236.09	5548.73	5356.17	5916.45	8914.64	8728.8	10473.5
PSMA6_HEK293T_gRNA355	PSMA6	8772.49	7672.47	8629.99	7274.24	1713.19	2331.25	2294.93	2515.55
VCP_HEK293T_gRNA1399	VCP	8044.95	8507.27	8176.86	7654.25	732.334	1196.82	1192.49	1777.03
SMU1_HEK293T_gRNA848	SMU1	7818.41	7787.07	7194.41	8121.07	1718.06	1516.67	1828.79	1109.89
COPG1_HEK293T_gRNA1098	COPG1	3261.37	4564.2	3466.41	4096.57	2072.39	4452.48	1663.26	3869.19
NUP133_HEK293T_gRNA1371	NUP133	7348.57	7391.37	9264.37	8171.85	1429.86	997.35	3100.73	1902.84
EMP3_HEK293T_gRNA305	EMP3	8510	7990.9	8697.96	9865.51	10458	11735.3	12277.1	13443.9
PSAP_HEK293T_gRNA1384	PSAP	8416.51	6698.07	7713.44	5369.28	10577.8	9237.13	8455.34	7904.71
RPA1_HEK293T_gRNA1900	RPA1	6570.68	6363.55	5618.76	6976.13	3412.45	5079.89	3738.36	4497.01
PRC1_HEK293T_gRNA1540	PRC1	7259.87	7531.92	6316.99	6216.11	7791.14	7517.47	6555.04	7997.25
gRNA_NT74	na	4863.89	4560.6	5449.87	5203.84	8365.45	7239.79	6466.32	7028.89
RRM1_HEK293T_gRNA1815	RRM1	9293.88	6582.9	6063.65	5541.26	89.8014	5.27233	701.191	3.62906
CPSF1_HEK293T_gRNA713	CPSF1	7631.43	9086.72	7670.19	8071.93	9447.94	7809.2	6976.82	7420.23
DDX27_HEK293T_gRNA1483	DDX27	9378.98	10519	10316.9	8510.91	8407.22	9044.69	8186.52	7561.15
gRNA_NT95	na	3972.13	5128.87	4897.88	4781.24	6339.01	8782.83	6265.03	7758.33
COPA_HEK293T_gRNA3712	COPA	8199.57	8012.11	8265.43	8772.98	2873.65	1602.79	3163.64	3819.59
MARS1_HEK293T_gRNA1153	MARS1	6302.2	7054.76	6529.13	6348.78	7757.73	9963.83	8682.45	7685.15
HMG20B_HEK293T_gRNA583	HMG20B	6139.19	5803.42	7081.12	5714.89	7765.39	6128.21	9243.27	7576.88
gRNA_NT39	na	7919.1	8521.85	8432.26	8959.71	13499.5	8045.58	10770.8	13100.3
SF3A3_HEK293T_gRNA1439	SF3A3	10370.2	11808.6	10990.4	11446.2	15223.8	18751.9	16287.6	13183.8
UFD1_HEK293T_gRNA505	UFD1	8422.5	8745.19	7558.97	9546.11	14296.5	13447.1	9885.53	14516.3
SFPQ_HEK293T_gRNA1387	SFPQ	8006.59	7405.38	7593.98	4840.21	3911.58	3982.37	4775.91	1867.76
TUBA1B_HEK293T_gRNA1104	TUBA1B	6610.23	6691.44	7573.38	7641.14	12498.4	9513.92	9455.81	9644.84
RPL10_HEK293T_gRNA622	RPL10	8428.5	8692.15	7581.62	7369.24	5721.53	5622.06	5095.06	3759.1
RPLP1_HEK293T_gRNA381	RPLP1	6945.84	8152.1	6807.19	6664.91	11112.4	8108.85	7682.64	9241.41
BOP1_HEK293T_gRNA1991	BOP1	8804.86	7437.02	9814.3	7782.01	11342.1	7294.27	14458.8	8650.48
WARS1_HEK293T_gRNA1359	WARS1	8913.93	8154.37	8741.21	7691.92	9256.51	9032.38	9081.05	9473.07
PAM16_HEK293T_gRNA351	PAM16	6521.54	6667.95	6722.74	7234.93	8298.63	8585.99	6512	8883.34
CNOT3_HEK293T_gRNA2462	CNOT3	5597.42	5215.82	6454.99	5742.73	4772.01	6533.3	6939.74	10454.1
SYPL1_HEK293T_gRNA680	SYPL1	6766.05	6456.55	6372.6	7364.33	10531.1	7885.65	6496.78	10349.5
PPP3R1_HEK293T_gRNA435	PPP3R1	8710.17	8387.17	8609.39	7890.12	9394.34	7786.36	9007.56	9515.4
gRNA_NT77	na	5662.15	6294.03	6061.59	4620.72	8870.15	7537.68	10731.1	3843.78
MDN1_HEK293T_gRNA712	MDN1	6869.13	7736.69	7348.88	5850.84	5032.36	8032.4	7553.53	5136.33
SRRT_HEK293T_gRNA2364	SRRT	5702.9	4960.66	5635.24	5167.81	7306.63	4434.03	9851.1	6880.1
RACK1_HEK293T_gRNA725	RACK1	7601.47	6896.97	7027.57	7171.05	2842.32	4105.39	5371.16	3609.1
CSE1L_HEK293T_gRNA2393	CSE1L	8804.86	8356.11	6001.86	7354.5	3776.53	2430.55	1471.9	2433.29
DDX27_HEK293T_gRNA2076	DDX27	8409.32	7512.03	8409.61	6774.66	11728.5	11078	11144.2	9359.96
VIRMA_HEK293T_gRNA2212	VIRMA	9233.95	10092.4	9653.64	7662.44	11640.8	12368.9	12034.8	7571.44
gRNA_NT72	na	5177.92	5888.09	5425.15	5264.45	6508.17	6907.63	6046.53	5834.32
GTPBP4_HEK293T_gRNA1056	GTPBP4	8744.93	9630.18	10164.4	7731.23	1346.33	1595.76	1515.61	1129.24
UTP4_HEK293T_gRNA308	UTP4	4823.13	5253.7	4994.68	5144.87	5862.15	4361.98	4578.6	4266.57
LTA4H_HEK293T_gRNA1609	LTA4H	9299.87	8699.35	9181.98	9066.18	11867.7	8919.03	12526.8	11760.6
NEDD8_HEK293T_gRNA339	NEDD8	7647.02	8770.57	7031.69	8019.52	9232.84	12541.1	6976.15	9463.39
RPL10_HEK293T_gRNA822	RPL10	6281.82	6077.32	6284.03	6242.32	4089.79	1071.16	842.886	1604.65
SARS1_HEK293T_gRNA349	SARS1	7431.27	7938.24	7785.53	8083.4	8657.83	8316.23	9226.72	8683.74
UFD1_HEK293T_gRNA681	UFD1	10475.7	8801.07	10131.5	7644.42	17394.3	14340.7	17082.8	13017.5
SF3A3_HEK293T_gRNA2300	SF3A3	7017.75	5757.57	6296.39	6412.67	5120.07	2198.56	2974.27	7200.06
CFAP298_HEK293T_gRNA869	CFAP298	6998.58	6740.69	7711.38	7639.51	7883.73	8662.44	10458.3	9788.79
LDHB_HEK293T_gRNA376	LDHB	6187.13	6367.71	6216.06	5318.5	7853.8	9556.98	7664.76	8945.64
RUVBL2_HEK293T_gRNA1822	RUVBL2	6963.82	7316.92	6356.12	6237.4	5546.8	7155.43	6584.84	6129.49
CDC16_HEK293T_gRNA853	CDC16	5465.58	5904.76	5412.8	7826.24	4836.75	5176.55	4534.9	7295.63
RUVBL2_HEK293T_gRNA673	RUVBL2	7648.21	8288.48	8732.97	9508.43	12105.8	17265.1	11454.1	14988.6
SFT2D1_HEK293T_gRNA329	SFT2D1	10014.2	10594	10333.3	11339.7	15367.2	9229.22	14280.7	14586.4
gRNA_NT76	na	7952.66	9873.97	9305.56	10469.9	12111.4	13243.2	13792.7	16231.6
TMEM50A_HEK293T_gRNA825	TMEM50A	9703.8	10171	9346.75	9061.27	13537.7	16535.8	10713.2	10227.3
SDF4_HEK293T_gRNA1147	SDF4	6618.62	5851.34	7614.58	7763.99	5667.24	6418.19	13057.1	10593.8
SLC29A1_HEK293T_gRNA723	SLC29A1	9084.13	8781.18	9369.41	8191.5	13446.5	10477.9	12119.5	12466.4
EIF1AX_HEK293T_gRNA291	EIF1AX	8765.3	7792.76	8938.94	8171.85	6666.88	9774.03	10729.7	11403.1
NOP16_HEK293T_gRNA916	NOP16	5108.4	6675.15	6868.98	6994.15	6184.46	12933	11687.2	10178.9
ARCN1_HEK293T_gRNA403	ARCN1	6214.7	5737.5	6815.43	6565	2578.48	1563.25	48.3352	514.117
gRNA_NT29	na	6909.88	7371.48	7194.41	7446.23	8359.89	8041.19	8303.72	8675.28
ANXA2_HEK293T_gRNA297	ANXA2	6760.06	7029.56	6286.09	6489.65	8345.96	10290.7	10218.6	8888.79
gRNA_NT73	na	6858.34	8583.8	8866.85	7780.37	10775.5	16501.5	14897.2	10895.7
IARS1_HEK293T_gRNA3171	IARS1	5360.1	6211.44	5847.39	6004.81	5791.84	6125.57	3861.52	4245.4
OAZ2_HEK293T_gRNA593	OAZ2	5666.94	6027.32	6121.32	6306.2	8223.44	6347.89	9267.11	8772.66
CCT7_HEK293T_gRNA866	CCT7	6932.65	5815.35	6312.87	5857.39	728.853	545.686	1779.79	1133.48
ARPC5L_HEK293T_gRNA1602	ARPC5L	4868.68	5772.92	5480.77	4830.38	7160.44	9641.34	6016.73	3782.09
SF3B6_HEK293T_gRNA380	SF3B6	4848.3	6097.97	4836.09	6150.59	2977.37	9715.15	3417.23	6235.94
gRNA_NT1	na	5174.32	6411.28	6819.55	5438.07	10115.5	7518.35	9475.02	7230.3
SFT2D1_HEK293T_gRNA443	SFT2D1	10283.9	9923.22	10327.2	8494.53	13777.2	12100	15191.1	11560.4
DDX47_HEK293T_gRNA863	DDX47	7753.69	7780.82	9219.05	9621.45	10136.4	10498.1	12424.8	10729.3
HMG20B_HEK293T_gRNA691	HMG20B	7612.26	7798.82	7762.87	7234.93	5454.22	10538.5	12074.5	7148.65
BUD23_HEK293T_gRNA223	BUD23	9087.72	10238.6	8590.86	8271.76	11355.4	10897	9446.54	12131.4
G6PC3_HEK293T_gRNA762	G6PC3	7630.24	7047.18	5684.67	6817.24	10513	11805.6	6659	9819.04
CCT8_HEK293T_gRNA843	CCT8	9109.3	8296.82	8300.44	7169.41	815.87	6.15105	514.472	798.999
gRNA_NT62	na	5450	6653.18	7114.08	4805.81	9560.72	8354.01	10480.1	6296.43
MCM3AP_HEK293T_gRNA109	MCM3AP	4465.95	4978.85	4463.29	4461.84	7837.78	5422.59	6308.07	6114.37
CKB_HEK293T_gRNA1416	CKB	9347.82	7321.09	10010	7641.14	8430.89	7412.9	16078.4	11304.5
RAN_HEK293T_gRNA375	RAN	5346.92	6624.19	6166.63	5351.26	625.129	1854.1	860.763	1214.53
NUP93_HEK293T_gRNA1990	NUP93	7433.67	7018.58	7107.9	6198.09	6401.66	4132.63	4765.32	5549.44
RPLP0_HEK293T_gRNA408	RPLP0	6109.22	5714.76	5513.72	5207.12	2655.06	1263.6	2125.42	866.136
SFPQ_HEK293T_gRNA1204	SFPQ	8091.69	6978.8	6969.9	6966.3	2075.87	1193.3	1187.85	2703.65
RPS28_HEK293T_gRNA230	RPS28	10629.1	9929.66	9455.92	9459.3	1709.71	2346.19	2571.7	2304.46
ARCN1_HEK293T_gRNA1194	ARCN1	4703.27	5063.9	5359.24	6910.61	7061.59	6133.48	5919.4	6421.63
SMU1_HEK293T_gRNA378	SMU1	4884.26	5491.62	5155.34	5338.15	2046.64	2831.24	1800.32	1915.54
YAE1_HEK293T_gRNA196	YAE1	7401.3	7917.4	7692.84	9302.05	9676.28	11956.8	10990.6	12713.8
RPLP2_HEK293T_gRNA498	RPLP2	5459.59	5585.2	5000.86	4492.96	1221.02	2829.49	952.799	1238.12
TRRAP_HEK293T_gRNA1651	TRRAP	5070.04	5470.78	4646.6	5610.06	1674.9	4272.35	2847.8	3640.56
EIF4A1_HEK293T_gRNA624	EIF4A1	5427.22	7057.41	6438.51	5788.6	4947.43	10557.8	13311.4	6881.31
IARS1_HEK293T_gRNA1173	IARS1	5684.92	4716.12	5472.53	5960.58	6021.57	5080.77	5802.87	10209.2
DYNC1H1_HEK293T_gRNA5684	DYNC1H1	4921.42	5482.91	5311.87	6026.1	2646.01	733.733	900.491	1999.01
UFD1_HEK293T_gRNA198	UFD1	9906.36	10043.5	9641.29	9138.25	13400.6	11489.3	8689.74	11790.8
RNF167_HEK293T_gRNA945	RNF167	5494.34	6616.05	6319.05	6122.74	9573.94	11406.7	8085.88	9842.02
SFT2D1_HEK293T_gRNA474	SFT2D1	9781.71	10615	10817.4	10030.9	12254.8	9980.53	12627.4	11483.6
TUBB_HEK293T_gRNA318	TUBB	8090.49	6263.53	7004.92	5947.48	816.566	1360.26	1099.79	884.282
KARS1_HEK293T_gRNA1404	KARS1	7488.8	6703.18	5981.26	4994.18	5258.6	1932.31	777.997	1123.8
gRNA_NT3	na	7064.5	8017.23	7169.69	5785.32	11600.4	9849.6	9380.33	6220.21
TCP1_HEK293T_gRNA650	TCP1	9375.38	8531.89	9412.66	9215.24	12261	7955.07	13290.2	11509
VIRMA_HEK293T_gRNA5006	VIRMA	5635.78	6042.09	6691.85	6442.15	11951.9	5267.94	9128.72	9418.63
CDC5L_HEK293T_gRNA1839	CDC5L	9728.97	8586.26	8883.33	8447.03	2891.74	3884.83	2335.32	2088.53
TRAP1_HEK293T_gRNA1582	TRAP1	6140.39	6741.26	6520.9	7130.1	8359.89	8653.66	7590.61	11195.7
CWC22_HEK293T_gRNA914	CWC22	5798.79	6086.8	7188.23	6843.45	9239.1	7873.35	9400.86	9646.05
INTS11_HEK293T_gRNA357	INTS11	7006.97	7055.14	8479.64	7331.57	8962.04	6973.54	12367.8	9800.89
WDR75_HEK293T_gRNA857	WDR75	8877.97	8014.57	7558.97	7321.74	1328.23	1094.89	2498.86	3348.42
PPP3R1_HEK293T_gRNA862	PPP3R1	10895.2	9496.07	9457.98	8307.8	15862.8	11360.1	12711.5	11641.4
gRNA_NT30	na	7086.07	7399.7	7692.84	6981.04	9706.21	11680.9	11144.2	8663.18
ARPC5L_HEK293T_gRNA1637	ARPC5L	7371.34	8006.81	7952.36	7026.91	9074.82	9992.83	9206.86	9529.92
MDN1_HEK293T_gRNA5826	MDN1	7587.09	7054	7252.08	10224.2	3072.74	1644.97	1853.95	2721.19
CIAO2B_HEK293T_gRNA437	CIAO2B	4607.39	4439.93	5348.95	5008.92	8380.77	7733.63	7781.3	10777.1
TRAM1_HEK293T_gRNA394	TRAM1	6353.73	5559.44	6757.76	5624.8	7312.9	10305.7	9814.69	6636.95
ITM2C_HEK293T_gRNA745	ITM2C	8442.88	8613.73	8905.99	10150.5	11776.5	12013.9	13445.1	13133.6
RPS11_HEK293T_gRNA364	RPS11	3973.33	4028.31	3538.5	4078.55	991.992	1753.93	548.24	2329.86
TRAP1_HEK293T_gRNA415	TRAP1	4430	4406.97	5404.56	4119.5	7595.53	5678.3	8066.67	4093.58
CCT8_HEK293T_gRNA502	CCT8	8791.67	8670.93	7727.86	7808.22	1019.14	481.54	1205.73	511.698
HADHB_HEK293T_gRNA344	HADHB	4219.04	4265.09	3596.17	4135.88	3378.34	6688.83	4542.18	6231.1
CDC5L_HEK293T_gRNA1323	CDC5L	6704.92	6792.21	7532.19	8153.83	1788.37	2315.43	2820.65	1672.39
PSMB3_HEK293T_gRNA277	PSMB3	8635.85	8844.82	7404.49	8206.25	12740.7	9703.73	6777.52	6878.28
SF3A3_HEK293T_gRNA2299	SF3A3	7255.08	6859.27	6852.5	6607.58	2740.68	5790.78	4647.46	3356.28
SNRNP200_HEK293T_gRNA1818	SNRNP200	8188.78	7868.72	7839.08	7804.94	380.786	1448.13	2653.8	663.514
gRNA_NT11	na	7481.61	8039.39	7400.37	8271.76	10144.1	11081.6	10549	12578.3
PAM16_HEK293T_gRNA327	PAM16	7274.25	7863.22	7738.16	8502.72	9366.5	9309.18	11329	9981.13
gRNA_NT52	na	4904.64	5205.97	5886.52	4468.39	5944.3	8327.65	7132.42	4970
PDLIM1_HEK293T_gRNA321	PDLIM1	7321	8364.06	6980.2	6805.78	12580.6	10035	11666	7391.8
gRNA_NT5	na	4877.07	6076.19	5602.29	5713.25	6580.56	8362.8	10605.9	7351.88
SLC29A1_HEK293T_gRNA386	SLC29A1	8318.23	8002.83	7822.6	8728.76	10632.1	12027.1	12441.3	11224.7
MCM3AP_HEK293T_gRNA2480	MCM3AP	6610.23	5982.23	7589.86	5752.56	9047.67	9589.49	10136.5	6756.71
WARS1_HEK293T_gRNA1621	WARS1	7460.04	8448.36	8572.32	6879.49	12158	13905.8	14380.7	10930.7
SF3A3_HEK293T_gRNA1072	SF3A3	8937.9	9146.58	8879.21	7578.9	11575.3	7110.62	8982.39	11183
DDX23_HEK293T_gRNA1565	DDX23	6883.51	6415.64	7091.42	4904.09	9811.33	8922.54	9566.39	7089.38
RPLP2_HEK293T_gRNA477	RPLP2	6046.9	5779.55	5390.14	5641.18	1601.11	1695.05	1601.68	2358.89
COPB1_HEK293T_gRNA1386	COPB1	6040.9	5988.1	7676.37	6353.7	304.907	227.589	901.815	1157.67
GTPBP4_HEK293T_gRNA2355	GTPBP4	4064.42	4633.15	4049.3	4235.8	6398.18	7014.84	4489.87	7271.43
ELOB_HEK293T_gRNA177	ELOB	7939.47	8586.83	7787.59	6853.28	9335.87	13682.6	9190.96	10733.6
SFPQ_HEK293T_gRNA1207	SFPQ	8961.87	7240.58	7769.05	8602.64	1408.98	985.047	1462.64	2881.48
HMG20B_HEK293T_gRNA690	HMG20B	8675.41	8706.54	7194.41	9239.81	15509.2	13121.1	9303.53	10807.4
CDC5L_HEK293T_gRNA994	CDC5L	6407.67	7144.17	6926.65	8851.61	2630.69	1579.06	2655.12	3979.27
YARS1_HEK293T_gRNA1564	YARS1	6897.9	7515.82	7070.83	6245.59	6865.98	9659.79	9578.97	10035
DDX27_HEK293T_gRNA1428	DDX27	8053.34	6511.68	5843.27	5819.72	6502.6	2397.15	4144.24	2605.67
NEDD8_HEK293T_gRNA309	NEDD8	6266.24	7454.63	6461.16	6517.5	6973.18	10809.2	6800.69	9202.7
EFTUD2_HEK293T_gRNA420	EFTUD2	9933.93	8171.99	7476.58	8601	334.841	746.035	616.439	694.361
GTPBP4_HEK293T_gRNA1021	GTPBP4	11122.9	9174.99	9600.09	8181.68	5206.39	3856.71	3560.25	3067.77
COPB1_HEK293T_gRNA944	COPB1	7092.07	8548.94	7330.34	8176.76	1900.45	427.938	909.098	308.47
gRNA_NT64	na	6358.53	7563.93	7497.18	5994.98	10593.1	10796	10962.1	5660.13
TIMM23_HEK293T_gRNA653	TIMM23	8318.23	8234.31	7806.13	7994.95	7040.01	7463.87	8881.75	6722.84
PSMA6_HEK293T_gRNA356	PSMA6	8690.99	6600.14	6605.34	6750.09	4213.71	1719.66	2684.26	4102.05
G6PC3_HEK293T_gRNA798	G6PC3	8056.93	7365.98	8257.19	7811.49	10579.9	10016.6	14297.9	8387.37
GARS1_HEK293T_gRNA1293	GARS1	5974.98	5655.28	5911.23	6029.38	5075.52	4163.39	7382.7	7769.82
gRNA_NT20	na	4074.01	4751.35	5795.89	5215.31	5741.03	8131.69	8543.41	9000.08
HDDC2_HEK293T_gRNA506	HDDC2	6637.8	7233.39	6675.37	7028.54	9366.5	8992.84	8553.34	7009.54
CNOT3_HEK293T_gRNA1194	CNOT3	8493.22	10017.9	9076.94	10789.3	12552	14215.1	11153.5	13874.5
WBP2_HEK293T_gRNA359	WBP2	7221.52	7089.04	6422.03	6317.66	11129.8	6817.13	8347.42	10751.7
TUBA1B_HEK293T_gRNA703	TUBA1B	6335.76	6440.26	5923.59	7180.87	1068.57	673.98	1471.9	2940.75
NOP16_HEK293T_gRNA667	NOP16	12139.3	9078.57	8187.16	10406	10909.1	9720.42	9965.65	10958.6
STK25_HEK293T_gRNA996	STK25	7098.06	7336.05	7534.25	7010.53	10407.2	13745	11440.9	12887.4
AARS1_HEK293T_gRNA1280	AARS1	7370.14	6726.1	8216	7049.84	4581.26	2293.46	3763.52	2625.63
gRNA_NT82	na	5378.08	5724.99	5767.06	5415.14	7864.24	6825.03	6735.8	6475.46
CDC16_HEK293T_gRNA1105	CDC16	7935.88	8069.51	7501.3	7071.13	9044.88	9832.02	6451.09	7851.48
TERF2_HEK293T_gRNA708	TERF2	6014.53	6735.01	7041.99	7760.72	10396.1	8258.23	7817.72	11247.7
RPLP2_HEK293T_gRNA501	RPLP2	5302.57	4949.49	5058.53	4661.67	761.572	346.217	996.499	998.597
CFAP298_HEK293T_gRNA1177	CFAP298	5933.03	5236.85	5456.05	4489.68	7468.14	5250.36	7378.73	4028.26
SFPQ_HEK293T_gRNA1865	SFPQ	7708.14	6115.97	7297.39	5408.59	4481.72	2837.39	5958.47	1728.04
YARS1_HEK293T_gRNA1549	YARS1	5344.52	5602.62	5301.57	5916.36	9113.1	8447.16	6528.56	6336.34
EMP3_HEK293T_gRNA307	EMP3	6489.18	7058.55	7301.51	6945.01	9280.87	12296.8	9296.9	7216.39
AQR_HEK293T_gRNA1241	AQR	5911.45	6896.59	5573.45	6271.8	210.929	950.777	188.706	253.43
gRNA_NT15	na	4674.51	5322.65	4766.06	3927.86	4176.81	9408.48	3999.24	5426.05
SNRPD2_HEK293T_gRNA534	SNRPD2	6096.04	5697.91	6003.92	5667.39	1211.97	1028.1	573.401	1304.65
DCTN2_HEK293T_gRNA632	DCTN2	7301.82	7766.05	7107.9	7438.04	8968.31	11564.9	6902.66	10539.4
SBNO1_HEK293T_gRNA3091	SBNO1	8615.48	7928.01	8700.02	5898.34	11782.8	8386.52	9139.32	5407.3
SF3B1_HEK293T_gRNA1903	SF3B1	6323.77	6139.64	5876.22	4448.74	1571.87	1074.68	213.204	64.7183
HDDC2_HEK293T_gRNA279	HDDC2	6412.47	6980.88	5612.58	7465.88	9121.46	10358.4	8751.97	12548.1
HMGB2_HEK293T_gRNA1077	HMGB2	7778.86	7041.5	7837.02	7754.17	10203.9	6715.19	7883.27	9863.19
HYOU1_HEK293T_gRNA520	HYOU1	5084.43	4864.81	5629.06	5349.62	6946.04	5578.13	7890.55	7656.11
RPS28_HEK293T_gRNA213	RPS28	7941.87	7385.49	7466.28	8003.14	9177.84	11635.2	7597.23	9733.15
CIAO2B_HEK293T_gRNA385	CIAO2B	4680.5	4190.27	3427.28	4411.06	9566.29	3895.38	3858.21	6408.32
ARCN1_HEK293T_gRNA360	ARCN1	5319.35	5552.81	6621.82	6101.45	2015.31	1731.08	4697.12	2655.87
HNRNPU_HEK293T_gRNA1779	HNRNPU	3818.71	3882.08	4174.94	3927.86	1875.39	3234.58	2946.46	5368.59
CKAP5_HEK293T_gRNA6087	CKAP5	7469.62	6900	7243.84	7413.47	8543.66	5630.85	9905.4	7042.8
EIF4A1_HEK293T_gRNA892	EIF4A1	7262.27	6551.27	6891.63	6750.09	533.936	810.182	1505.67	468.754
DDX47_HEK293T_gRNA201	DDX47	7599.07	7845.04	8038.87	7171.05	8419.75	9465.59	6881.47	6081.1
BOP1_HEK293T_gRNA1616	BOP1	7035.73	5489.73	6537.37	6034.29	6069.6	5992.01	6911.27	9104.11
gRNA_NT78	na	5512.32	6615.29	5851.5	7128.46	9804.37	7491.11	7180.09	10413
GARS1_HEK293T_gRNA1342	GARS1	5532.7	6345.55	6259.32	4117.86	1211.27	1718.78	1535.47	761.498
PSMA6_HEK293T_gRNA238	PSMA6	9420.93	7987.49	8302.5	8571.51	2955.79	3545.64	3884.69	5914.16
XPO1_HEK293T_gRNA3286	XPO1	7130.42	6716.44	5594.05	6407.75	387.051	675.737	323.117	220.163
SNRPD2_HEK293T_gRNA543	SNRPD2	8055.74	7944.87	8687.66	9542.83	8536.01	5332.96	6829.16	7552.08
TCP1_HEK293T_gRNA1834	TCP1	6140.39	5427.79	5688.79	6451.98	778.279	1147.61	1231.55	1863.52
RPL7_HEK293T_gRNA840	RPL7	7012.96	6752.06	6156.33	5798.43	132.266	1323.36	995.175	1444.97
UTP4_HEK293T_gRNA1739	UTP4	8090.49	7806.77	8265.43	8225.9	5851.01	7924.32	9782.24	8141.2
CIAO3_HEK293T_gRNA392	CIAO3	5652.56	6339.11	6483.82	6902.42	10213	9893.53	9749.14	7601.68
SYPL1_HEK293T_gRNA323	SYPL1	6568.28	6240.61	5470.47	5192.38	13459.1	8627.29	5506.24	5680.09
OAZ2_HEK293T_gRNA521	OAZ2	9502.44	8731.55	8183.04	8864.71	16557.6	9325	8762.57	13547.9
GMPPB_HEK293T_gRNA1247	GMPPB	8836.02	8878.35	8572.32	8753.33	15299	12449.7	8875.13	8863.99
DYNC1H1_HEK293T_gRNA13057	DYNC1H1	7211.93	6787.1	6154.28	5949.12	6802.63	6563.18	4893.11	3900.03
TSG101_HEK293T_gRNA478	TSG101	6967.41	7363.71	6623.88	8612.46	2323.7	1653.75	1027.62	1627.63
LSM7_HEK293T_gRNA79	LSM7	8169.6	7636.67	10032.6	8127.62	11494.6	10411.1	10441.1	7207.32
PSAP_HEK293T_gRNA750	PSAP	9055.36	8766.21	9136.67	9364.29	13099.9	11883	10511.9	11201.7
RACK1_HEK293T_gRNA1232	RACK1	7723.73	7487.97	7227.36	6782.85	4123.21	5680.06	6435.86	2292.96
VCP_HEK293T_gRNA1647	VCP	8635.85	7229.03	8040.93	8958.08	7140.95	6935.75	7466.13	12404.1
SF3B6_HEK293T_gRNA384	SF3B6	8989.44	8798.98	9328.22	9072.73	15626.8	10597.4	11946.1	13625.3
PSMB3_HEK293T_gRNA231	PSMB3	7398.91	7272.6	6652.71	7844.25	8364.76	11845.2	8411.64	10655.5
MARS1_HEK293T_gRNA1921	MARS1	9200.39	7978.58	8759.75	9231.62	8985.01	9065.78	11354.1	13012.6
RAN_HEK293T_gRNA474	RAN	10265.9	7583.44	7420.97	7937.62	582.665	401.576	2291.62	1131.66
VARS1_HEK293T_gRNA2595	VARS1	9369.39	9552.33	8673.24	9413.43	2859.72	4526.3	4507.09	2896.6
MARS1_HEK293T_gRNA1888	MARS1	4420.41	4315.86	5886.52	4420.89	5806.46	6204.66	9673.65	8091
XPO1_HEK293T_gRNA1890	XPO1	10729.8	9132.37	10273.6	9646.02	2785.93	2800.49	5606.88	3771.81
CKB_HEK293T_gRNA1331	CKB	7372.54	6515.46	6473.52	7126.82	12104.4	7868.96	6707.99	7135.95
CCT8_HEK293T_gRNA1032	CCT8	6172.75	6734.25	7616.64	7855.72	3537.76	2847.94	4642.16	4866.57
CSE1L_HEK293T_gRNA1747	CSE1L	5797.59	5883.35	6176.93	5397.12	1554.47	1819.83	3523.83	2783.49
TIMM23_HEK293T_gRNA704	TIMM23	6501.16	6477.2	7486.88	7115.36	6899.39	7424.32	12604.2	9755.53
HAUS7_HEK293T_gRNA1029	HAUS7	11606	10896.9	10994.5	10902.3	16529.7	13895.2	12857.2	15915.3
SYPL1_HEK293T_gRNA659	SYPL1	7865.16	8334.32	8452.86	8243.92	14272.2	9060.5	10611.2	9990.21
gRNA_NT40	na	1723.57	2239.95	1791.91	2622.4	3983.28	3078.16	2455.82	4135.92
EFTUD2_HEK293T_gRNA417	EFTUD2	7534.35	6923.68	6551.79	7788.56	504.698	540.414	1215.66	795.37
YJU2_HEK293T_gRNA304	YJU2	6883.51	6199.5	5750.58	5157.98	6705.87	7140.5	7563.46	7973.05
OAZ2_HEK293T_gRNA274	OAZ2	9051.76	8021.96	7542.49	10225.9	9161.83	12637.8	12399	14881.6
AARS1_HEK293T_gRNA2513	AARS1	8275.08	6348.77	5983.32	5778.77	4996.86	4760.92	4671.3	3124.02
SNRNP200_HEK293T_gRNA5995	SNRNP200	8273.88	7242.67	7589.86	7613.3	4.87295	426.18	537.646	2597.2
CPSF1_HEK293T_gRNA1150	CPSF1	4843.51	4671.98	3890.7	5272.64	2375.21	1557.1	1353.38	1069.97
YAE1_HEK293T_gRNA194	YAE1	8086.9	8122.74	8014.15	9228.34	10317.4	9475.26	10468.9	10639.2
PSMD1_HEK293T_gRNA2105	PSMD1	7698.55	7500.47	7083.18	6542.06	2646.01	1575.55	1467.27	1503.04
PRPF8_HEK293T_gRNA5243	PRPF8	5519.52	6109.72	5571.39	5651.01	3917.15	3506.98	2136.68	3295.79
CFAP298_HEK293T_gRNA1068	CFAP298	6829.58	8448.17	7589.86	6481.46	8219.27	14062.2	11505.8	9499.68
TUBA1B_HEK293T_gRNA386	TUBA1B	7756.09	7285.48	7153.21	7020.35	4881.99	4188.87	5212.91	5500.45
NUP93_HEK293T_gRNA2173	NUP93	9284.29	9927.58	8174.81	9324.98	6317.43	2574.66	3008.7	3496
BOP1_HEK293T_gRNA1976	BOP1	6181.14	6702.99	7631.05	5939.29	4044.54	3579.91	4679.24	6753.69
KPNB1_HEK293T_gRNA1301	KPNB1	8040.15	6404.46	5299.51	6507.67	1459.1	2359.37	2006.24	2065.54
NOP16_HEK293T_gRNA666	NOP16	7866.36	6928.41	7579.56	8242.28	6584.04	7020.11	7746.21	13437.8
WDR75_HEK293T_gRNA382	WDR75	14019.9	13197.6	13832.7	11595.2	1676.29	1269.75	3562.24	2066.75
RPP21_HEK293T_gRNA379	RPP21	5459.59	6885.79	5662.02	6245.59	6181.68	8079.85	6132.61	7658.53
TRAP1_HEK293T_gRNA1348	TRAP1	4612.18	5352.2	5876.22	6319.3	7223.1	7183.55	7377.4	9213.59
ELOC_HEK293T_gRNA378	ELOC	5957	6099.68	8016.21	5782.05	4330.66	6782.86	9935.19	5308.71
RPLP0_HEK293T_gRNA916	RPLP0	12569.6	10881.7	9445.62	8073.57	966.932	1939.34	2548.52	1410.5
PSMB3_HEK293T_gRNA402	PSMB3	2693.24	3448.67	3140.99	3505.26	350.156	1074.68	1277.9	2391.55
DARS1_HEK293T_gRNA1497	DARS1	6737.28	6148.93	6860.74	6650.17	8267.3	6089.54	6698.72	3900.03
gRNA_NT46	na	5278.6	5851.15	6494.12	6437.23	10501.2	9103.56	7587.96	10573.9
BUD23_HEK293T_gRNA241	BUD23	8868.38	7682.89	8582.62	9379.03	4648.09	4361.1	5560.53	5868.2
gRNA_NT59	na	2609.33	3320.05	2648.73	3364.4	3667.24	4764.43	3013.33	4118.99
DDX27_HEK293T_gRNA677	DDX27	9512.02	10058.5	10339.5	9698.44	7426.37	5077.26	9665.05	6986.55
RACK1_HEK293T_gRNA1233	RACK1	7874.75	6916.29	6846.32	6221.02	2868.77	1971.85	4117.1	3042.97
SFT2D1_HEK293T_gRNA312	SFT2D1	5539.89	5842.63	6129.56	6524.05	5493.9	7610.61	7337.01	7520.63
DDX47_HEK293T_gRNA865	DDX47	8295.45	8779.47	8080.06	9375.76	2936.3	3265.33	3817.82	3780.88
CKB_HEK293T_gRNA1311	CKB	5885.09	5982.04	6951.36	6478.18	6219.97	8702.86	10874.7	10454.7
PSMA2_HEK293T_gRNA708	PSMA2	7255.08	7083.36	6652.71	6953.2	4609.81	2880.45	4440.88	3455.47
EIF3D_HEK293T_gRNA935	EIF3D	10943.1	9374.08	10257.1	10922	12774.1	8389.16	8111.7	8083.13
MTREX_HEK293T_gRNA757	MTREX	4476.74	4533.89	5466.35	4080.19	2265.92	2789.06	3631.76	2260.91
ARCN1_HEK293T_gRNA247	ARCN1	6905.09	6124.49	5635.24	5916.36	2778.27	482.418	979.284	992.549
RRM1_HEK293T_gRNA1334	RRM1	5785.6	6055.16	5594.05	5138.32	395.405	1563.25	1607.64	993.154
TCP1_HEK293T_gRNA834	TCP1	6960.22	7368.26	5905.06	6214.47	7556.55	5939.28	4502.45	6576.47
CDC16_HEK293T_gRNA892	CDC16	5814.37	6862.68	6428.21	6863.11	5458.39	5754.75	6108.11	7939.79
NARS1_HEK293T_gRNA1808	NARS1	7629.04	7602.57	7754.63	9030.15	12368.9	8131.69	7734.29	9802.1
RPL30_HEK293T_gRNA195	RPL30	5843.13	4448.08	4613.65	4031.05	616.776	127.415	625.046	352.624
gRNA_NT18	na	3642.52	4141.59	3598.23	4070.36	4893.83	3918.22	4862.65	2775.63
gRNA_NT93	na	3246.99	3730.73	4310.88	4201.4	5250.25	7201.13	5006.99	6888.57
gRNA_NT90	na	5151.55	5832.02	4852.57	5808.25	7760.51	7874.23	5134.12	11058.4
gRNA_NT16	na	5748.45	6524.37	5610.52	7036.73	6966.92	10255.6	7242.99	6203.28
XPO1_HEK293T_gRNA3284	XPO1	7501.99	6704.13	6510.6	6045.76	3372.77	1669.57	621.736	3055.67
NEDD8_HEK293T_gRNA254	NEDD8	9585.14	8255.14	8304.56	10199.7	11047.7	12746.7	8877.12	12916.4
SBNO1_HEK293T_gRNA2201	SBNO1	5572.25	5029.99	5383.96	6931.9	5145.83	5710.81	4832.19	7705.71
BOP1_HEK293T_gRNA775	BOP1	6443.63	6410.71	5995.68	5526.52	4106.5	4437.55	1919.5	1734.09
gRNA_NT37	na	8984.64	9568.24	9944.06	9629.64	12866.7	18044.6	13850.3	13530.4
KPNB1_HEK293T_gRNA702	KPNB1	6692.94	7805.64	7079.06	6234.13	10659.2	10528.8	9981.54	9125.28
CIAO3_HEK293T_gRNA417	CIAO3	5019.7	5528.75	5878.28	6992.51	8247.81	6546.48	5555.9	9826.29
DDX23_HEK293T_gRNA2410	DDX23	6739.68	6909.66	5880.34	7482.26	6925.85	5293.42	6296.15	7774.66
CNPY3_HEK293T_gRNA825	CNPY3	5786.8	7151.36	6281.97	6438.87	9285.05	10824.1	7575.38	6615.18
AQR_HEK293T_gRNA3702	AQR	7566.71	8095.46	8658.83	8876.18	215.802	133.566	106.602	288.511
gRNA_NT47	na	6152.37	7175.42	5521.96	5454.45	7816.9	6369.86	7485.99	6951.47
RPS6_HEK293T_gRNA147	RPS6	7018.95	7459.37	6028.64	6155.5	2177.51	2608.93	2980.89	3228.05
PRPF8_HEK293T_gRNA6168	PRPF8	8072.52	6670.6	6971.96	6886.04	4663.41	5637.88	3424.51	4329.47
TSG101_HEK293T_gRNA573	TSG101	5662.15	5796.03	6242.84	5980.24	8450.38	7436.63	8869.83	9503.91
SF3B1_HEK293T_gRNA3046	SF3B1	4999.33	4193.87	5688.79	4863.14	5506.43	2403.3	3804.57	4930.69
TCP1_HEK293T_gRNA1460	TCP1	5308.56	5632.74	4488.01	6075.24	7395.74	7833.81	7305.23	8334.14
TERF2_HEK293T_gRNA1590	TERF2	6155.97	6574.38	6881.34	6761.55	6362.67	7705.51	8885.72	7373.05
CWC22_HEK293T_gRNA2064	CWC22	8610.68	8289.62	8234.54	9678.78	14769.9	9158.04	10840.3	9759.76
gRNA_NT51	na	7342.57	8220.29	7198.52	6972.85	11408.3	11947.1	8835.4	7528.49
VCP_HEK293T_gRNA3137	VCP	6263.84	5049.12	6646.53	6330.77	5668.63	7375.11	6176.31	4928.87
gRNA_NT85	na	4851.9	4174.74	4039	4158.81	3961.7	4564.08	3466.89	4948.83
RPLP1_HEK293T_gRNA340	RPLP1	5696.91	6059.14	6261.38	5402.04	4203.26	2304.89	4655.4	3358.7
EFTUD2_HEK293T_gRNA987	EFTUD2	8778.49	7709.98	7453.92	9148.08	4169.15	5171.28	3088.15	3293.98
COPA_HEK293T_gRNA585	COPA	4488.73	5629.52	4094.61	5382.38	4774.09	3188.88	1692.39	3446.4
EFTUD2_HEK293T_gRNA674	EFTUD2	8643.05	8421.65	8706.2	9880.25	584.057	96.6594	1651.34	372.584
UTP4_HEK293T_gRNA218	UTP4	7323.4	7249.49	6619.76	5847.56	7717.35	6919.94	7893.86	7551.48
RAN_HEK293T_gRNA863	RAN	6046.9	6376.24	6613.58	6214.47	1758.44	841.816	3725.12	2300.22
U2AF2_HEK293T_gRNA361	U2AF2	9822.46	8168.39	8518.77	7565.8	11355.4	8786.34	12211.6	10667
CCDC167_HEK293T_gRNA324	CCDC167	7992.21	6984.1	7670.19	8705.83	15828	7383.02	11541.5	10145.7
NUP133_HEK293T_gRNA557	NUP133	6830.77	7081.09	6963.72	8407.72	6432.29	7833.81	6188.22	9271.05
RPL30_HEK293T_gRNA184	RPL30	4038.06	4022.82	4207.89	4234.16	561.085	1360.26	2785.56	803.233
gRNA_NT41	na	7332.98	7011.76	7101.72	5759.11	9273.21	8965.6	9708.08	8930.52
SFT2D1_HEK293T_gRNA359	SFT2D1	8554.35	9571.65	8850.37	9154.63	12708.6	13689.6	11409.7	7843.01
TRAP1_HEK293T_gRNA2109	TRAP1	6249.46	6963.45	7097.6	6756.64	6194.21	13596.5	11742.8	8302.09
YAE1_HEK293T_gRNA246	YAE1	4919.02	5168.46	5161.52	5108.84	6688.47	6676.53	7416.47	6278.88
MAT2A_HEK293T_gRNA1073	MAT2A	5082.03	5582.36	5474.59	5108.84	2482.42	3036.86	3738.36	3527.45
CNOT3_HEK293T_gRNA568	CNOT3	5827.55	5461.5	5145.04	5090.82	7134.69	5804.84	4857.35	7464.98
VCP_HEK293T_gRNA2215	VCP	3809.12	4351.47	5147.1	5218.58	7420.1	8460.34	6659.66	8504.11
LSM7_HEK293T_gRNA82	LSM7	5863.51	7125.6	6757.76	5695.23	6767.82	9955.04	7027.14	8076.48
RPL7_HEK293T_gRNA570	RPL7	7116.04	6605.44	5816.49	5064.61	476.156	1676.6	323.779	1.81453
COPG1_HEK293T_gRNA526	COPG1	4963.37	5574.59	5330.41	5254.62	109.293	838.301	1503.69	1356.66
RPL17_HEK293T_gRNA246	RPL17	6105.63	5652.25	5826.79	5308.67	5.56908	100.174	241.676	999.807
CNPY3_HEK293T_gRNA771	CNPY3	5750.84	6049.48	5371.6	5177.63	11309.4	7564.04	4415.71	6666.59
NOP16_HEK293T_gRNA790	NOP16	5653.76	6274.89	6271.68	4501.15	7216.83	11601.8	6141.88	7169.82
CPSF1_HEK293T_gRNA3856	CPSF1	6917.07	5865.17	6619.76	7126.82	5485.54	1153.76	2861.71	2881.48
RPA1_HEK293T_gRNA266	RPA1	4341.3	4562.87	4745.47	5564.19	1564.91	688.918	1747.35	656.256
SNRNP200_HEK293T_gRNA6096	SNRNP200	6606.64	6694.66	6856.62	8119.43	730.942	1227.57	511.161	662.909
HMGB2_HEK293T_gRNA1107	HMGB2	6689.34	7266.72	6580.63	8122.71	9853.09	9794.24	10028.6	7882.33
UTP4_HEK293T_gRNA1738	UTP4	6574.28	7099.46	6724.8	6106.36	6531.83	7061.41	4542.84	5295.41
CDC16_HEK293T_gRNA587	CDC16	5905.46	5058.6	5149.16	4604.34	7580.91	4261.8	6202.13	4720.2
WARS1_HEK293T_gRNA1331	WARS1	6955.43	7384.74	7346.82	7382.35	5136.08	3173.94	4668.65	2485.91
WBP2_HEK293T_gRNA362	WBP2	6298.6	7069.91	7140.85	7252.95	10160.1	8273.17	9860.37	13097.9
gRNA_NT8	na	4135.14	5237.22	4133.74	6802.5	5998.6	4987.63	3326.52	12743.5
CKAP5_HEK293T_gRNA5748	CKAP5	8525.58	8421.46	8316.92	9311.88	11947.8	9730.09	11490.5	12303.1
EFTUD2_HEK293T_gRNA846	EFTUD2	5490.75	5860.81	6862.8	8222.63	105.813	139.717	621.736	1207.87
COX7A2L_HEK293T_gRNA73	COX7A2L	6076.86	7329.04	6436.45	7193.98	9928.97	11088.6	9637.9	8581.53
PSMD2_HEK293T_gRNA1638	PSMD2	10081.4	9809.94	11324	10573.1	11480	13697.5	12313.5	13070.7
SBNO1_HEK293T_gRNA510	SBNO1	9184.81	10316.1	10246.8	9002.3	8758.07	8411.13	9978.23	7538.17
gRNA_NT63	na	8893.55	9190.9	8115.07	9028.51	11896.9	14031.4	12046	11719.5
gRNA_NT34	na	2682.45	3793.43	3213.08	3501.99	3990.25	6605.35	4585.22	4746.21
RPL10_HEK293T_gRNA623	RPL10	9673.83	9812.41	8428.14	8961.35	4772.7	3246	3126.56	5656.5
SFT2D1_HEK293T_gRNA357	SFT2D1	7703.35	6752.06	7258.25	7773.82	14861.8	8933.97	10741	10653.1
gRNA_NT28	na	4086	4736.95	4475.65	4689.52	7225.19	6195.87	5112.93	5139.36
CNPY3_HEK293T_gRNA844	CNPY3	6794.82	7628.53	6370.54	7285.7	8999.63	12781.9	8838.71	11386.2
DDX23_HEK293T_gRNA2235	DDX23	3365.65	3412.87	4467.41	3860.7	548.554	2143.2	1945.32	1335.5
DYNC1H1_HEK293T_gRNA734	DYNC1H1	7869.95	7678.91	7750.51	7080.96	5237.02	2767.1	3376.18	2772
PSMA6_HEK293T_gRNA718	PSMA6	6697.73	6914.77	5890.64	7379.07	4177.51	3353.2	3041.8	6592.8
UBA52_HEK293T_gRNA354	UBA52	11131.3	9486.41	9962.59	8304.52	2517.22	1144.1	722.379	935.694
POLA1_HEK293T_gRNA3248	POLA1	5702.9	5357.13	4012.22	4306.23	2799.85	2822.46	1999.62	974.404
CCT2_HEK293T_gRNA258	CCT2	4416.81	4498.09	5418.98	4512.62	6817.95	5825.05	6702.03	4731.69
SNU13_HEK293T_gRNA660	SNU13	7993.41	7843.52	7766.99	7503.56	7858.67	9586.86	6959.6	6898.85
DDX47_HEK293T_gRNA419	DDX47	6280.62	6654.5	6798.95	6247.23	8794.27	5810.99	9339.94	6789.98
SARS1_HEK293T_gRNA1108	SARS1	5269.01	5500.34	6065.71	6533.88	8147.56	10765.2	9268.43	7888.98
YJU2_HEK293T_gRNA201	YJU2	5455.99	5660.21	4920.54	5809.89	9362.32	5088.68	4570.65	5803.48
SDF4_HEK293T_gRNA589	SDF4	7142.41	7479.64	6450.87	6908.97	6758.77	11629.9	7478.71	8697.66
UFD1_HEK293T_gRNA631	UFD1	8865.98	8905.63	9587.73	8851.61	11777.9	9101.8	12530.1	10059.2
GTPBP4_HEK293T_gRNA1400	GTPBP4	4942.99	5372.85	5925.65	6512.58	3155.58	3864.62	5193.05	4880.49
TIMM23_HEK293T_gRNA777	TIMM23	5429.62	7544.61	5680.55	5297.21	6267.3	16984.8	7881.28	6993.81
MLEC_HEK293T_gRNA901	MLEC	7768.07	8488.14	7285.03	8075.21	11625.5	9116.74	6405.4	6653.89
CFAP298_HEK293T_gRNA1482	CFAP298	4996.93	5567.77	5458.11	5806.61	7583.69	8253.84	5796.91	10816.4
DDX27_HEK293T_gRNA770	DDX27	3232.6	3715.57	3151.29	3690.35	2910.54	4036.85	2944.47	3332.69
HMGB2_HEK293T_gRNA1025	HMGB2	7251.48	7841.25	7013.15	6427.41	9696.46	8691.44	8984.38	7218.81
LTA4H_HEK293T_gRNA1911	LTA4H	7955.05	7316.92	7299.45	10524	11489	10450.6	8689.74	13817.7
MLEC_HEK293T_gRNA1225	MLEC	8990.64	9392.26	7633.11	8887.64	12452.5	10457.7	7383.36	11704.3
RPS6_HEK293T_gRNA281	RPS6	10333.1	6857.57	7927.65	7058.03	458.057	724.946	346.954	350.205
SLC35B1_HEK293T_gRNA626	SLC35B1	7612.26	7581.74	9103.71	8211.16	8513.73	7152.8	10715.2	7993.01
YJU2_HEK293T_gRNA252	YJU2	8925.91	8799.36	7077	7760.72	13155.6	9789.84	8203.07	9027.3
VIRMA_HEK293T_gRNA1114	VIRMA	4909.43	5355.43	5416.92	4743.57	6371.03	4713.47	5612.18	3194.18
gRNA_NT55	na	5899.47	5407.9	5186.23	5773.86	10207.4	5986.73	5699.58	6422.84
RNF167_HEK293T_gRNA1323	RNF167	7480.41	6962.13	7112.02	6584.65	8653.65	5522.77	8472.56	7547.85
PSMD1_HEK293T_gRNA1832	PSMD1	12594.8	8678.7	8335.46	6987.59	267.316	542.172	503.878	234.075
RPLP0_HEK293T_gRNA407	RPLP0	4493.52	4178.34	5762.94	4763.23	2945.35	2492.93	6112.74	3581.89
LTA4H_HEK293T_gRNA1284	LTA4H	4921.42	5482.34	6689.79	6314.39	6043.15	8916.39	12489	8998.26
RUVBL2_HEK293T_gRNA1630	RUVBL2	9372.99	9143.36	9216.99	7939.26	13464.6	10417.3	11592.5	5837.35
UTP4_HEK293T_gRNA1603	UTP4	5675.33	6056.11	6891.63	5069.53	8733.01	8573.69	12929.3	6696.23
gRNA_NT42	na	5855.12	5242.72	5011.16	5898.34	9197.34	8076.33	5935.96	7465.59
gRNA_NT38	na	6418.46	6317.33	6906.05	7362.69	8517.21	11155.4	9598.83	9499.68
LDHB_HEK293T_gRNA396	LDHB	6236.27	5533.11	6743.34	7570.71	7466.05	7444.53	11228.3	11750.3
LTA4H_HEK293T_gRNA1710	LTA4H	7210.73	7068.77	6129.56	6599.39	11748	7837.32	7822.35	11053.5
gRNA_NT14	na	6749.27	6805.85	7626.93	6265.25	8714.22	7636.09	10421.2	11981.4
TRAM1_HEK293T_gRNA321	TRAM1	5771.22	5634.83	5357.19	5775.49	8746.94	5410.29	6609.34	9663.59
NARS1_HEK293T_gRNA1199	NARS1	8502.81	7944.87	9070.76	7706.66	17003.1	9647.49	12227.5	9715
VIRMA_HEK293T_gRNA2158	VIRMA	11634.7	10513.5	10312.7	10152.2	10934.9	9397.05	9623.33	14519.3
MARS1_HEK293T_gRNA1138	MARS1	6884.71	7095.1	8117.13	7741.06	12091.9	9727.45	10157.7	8629.31
PSMA6_HEK293T_gRNA434	PSMA6	6515.54	7261.42	6883.4	6255.42	3124.25	4669.53	5044.07	3626.64
NUP133_HEK293T_gRNA2954	NUP133	3552.63	4473.08	3863.93	4931.94	1024.71	1065.01	1287.83	701.014
LSM8_HEK293T_gRNA311	LSM8	4999.33	5670.06	6073.95	5598.59	8811.68	6510.45	6992.71	6874.05
GTPBP4_HEK293T_gRNA1055	GTPBP4	8301.45	7011.38	9429.14	7811.49	4545.76	5919.07	8506.99	7626.48
SPOUT1_HEK293T_gRNA852	SPOUT1	8495.62	7908.69	7752.57	8604.27	7138.86	13283.6	8593.06	10374.9
SARS1_HEK293T_gRNA76	SARS1	8969.06	7236.04	7682.55	7544.5	7210.57	5745.09	7283.38	7731.11
PRELID3B_HEK293T_gRNA183	PRELID3B	5393.66	5310.53	6063.65	6266.89	10277	5530.68	7824.34	9587.99
GMPPB_HEK293T_gRNA548	GMPPB	8450.07	8877.78	8166.57	8368.41	11380.4	10447.1	10766.8	15516.7
CIAO3_HEK293T_gRNA260	CIAO3	7227.51	8613.73	8329.28	8445.39	9715.26	10396.2	9988.16	12230.5
DARS1_HEK293T_gRNA1449	DARS1	6909.88	5901.73	6051.29	5311.95	3463.97	1218.79	2819.99	2374.01
COPG1_HEK293T_gRNA1635	COPG1	11311.1	9454.77	9260.25	8899.11	882.003	1797.87	1747.35	132.461
TSG101_HEK293T_gRNA1395	TSG101	5955.8	5973.14	6055.41	5999.9	9456.3	9621.13	8191.15	5894.2
gRNA_NT65	na	6808	7471.87	7200.58	6943.37	13370	15360.9	9750.46	5604.48
gRNA_NT48	na	3758.78	4543.17	4012.22	3583.89	4048.03	5900.62	5490.34	5231.29
PRPF8_HEK293T_gRNA5348	PRPF8	7165.18	7836.33	6259.32	7657.52	5905.31	3024.56	3719.16	2785.91
gRNA_NT88	na	4966.96	5822.36	5579.63	4492.96	7163.93	8178.27	6312.04	4304.67
DYNC1H1_HEK293T_gRNA9757	DYNC1H1	6720.5	6444.81	7029.63	6411.03	8678.02	9103.56	9784.89	8733.34
SMU1_HEK293T_gRNA665	SMU1	5326.54	5625.55	5746.46	4646.93	2136.44	3209.97	1106.41	2627.44
gRNA_NT27	na	5732.86	7091.32	6234.6	8376.59	8836.74	9557.86	7761.44	12515.4
SPOUT1_HEK293T_gRNA532	SPOUT1	7123.23	7527.18	6838.08	6956.47	10543.7	9972.62	10327.8	9799.68
YJU2_HEK293T_gRNA339	YJU2	4540.27	5359.78	5563.15	4763.23	5181.33	7369.84	6681.51	7451.68
PSMB3_HEK293T_gRNA532	PSMB3	6028.92	6272.62	5147.1	5764.03	4457.35	4235.44	4730.89	6419.21
TRRAP_HEK293T_gRNA2597	TRRAP	5475.17	4852.69	4317.06	5904.89	4967.62	5701.15	4388.57	8397.65
ELOB_HEK293T_gRNA195	ELOB	6501.16	6959.29	8444.62	7252.95	7058.11	8456.82	11552.8	11147.9
NIFK_HEK293T_gRNA213	NIFK	6205.11	6977.85	5299.51	5926.19	9718.74	10427.8	5044.73	7783.74
MTREX_HEK293T_gRNA1156	MTREX	4340.1	5278.52	5606.4	6964.66	527.67	2046.54	1103.76	916.339
CCT7_HEK293T_gRNA612	CCT7	8893.55	9440.38	8238.65	7095.7	2270.79	3429.65	4045.59	3892.78
AQR_HEK293T_gRNA2626	AQR	4168.7	4661.18	4955.55	3524.92	161.503	172.23	935.583	94.9605
WDR75_HEK293T_gRNA852	WDR75	7322.2	7033.92	6908.11	7143.2	1731.29	2797.85	2302.21	4081.49
HNRNPU_HEK293T_gRNA1138	HNRNPU	9678.63	8195.66	8098.6	9223.43	1213.36	279.434	752.175	866.741
gRNA_NT6	na	6993.78	7525.48	6166.63	6771.38	11983.3	11528	7174.13	9845.65
TIMM23_HEK293T_gRNA798	TIMM23	5162.33	6060.09	6216.06	7100.61	7012.86	6838.22	7310.53	8232.53
MAT2A_HEK293T_gRNA1058	MAT2A	7264.66	7836.7	7079.06	6887.68	6996.16	8944.51	8681.79	8417.01
CWC22_HEK293T_gRNA446	CWC22	7271.86	8085.99	6630.06	5614.97	1098.5	2735.46	1440.79	830.451
MAT2A_HEK293T_gRNA1044	MAT2A	7300.62	7296.65	6125.44	8360.22	6113.46	7977.92	8576.51	7487.36
DDX47_HEK293T_gRNA864	DDX47	10589.6	10478.4	11396.1	12196.3	10288.2	8751.19	11794.4	13408.2
LSM7_HEK293T_gRNA215	LSM7	3544.24	3883.02	4450.93	4931.94	922.379	1727.57	2750.47	1233.88
gRNA_NT96	na	5336.13	5749.62	5217.13	5965.5	7942.9	6758.25	5316.21	8668.62
YARS1_HEK293T_gRNA1027	YARS1	6166.75	6447.46	6457.05	6402.84	7903.22	7159.83	7916.37	10648.9
LSM8_HEK293T_gRNA391	LSM8	6576.67	7039.03	6409.67	6899.14	8572.9	4517.51	5211.59	6213.56
PRC1_HEK293T_gRNA1801	PRC1	6413.66	6387.6	6100.72	7420.02	6401.66	4762.67	6474.93	9243.22
CCT7_HEK293T_gRNA945	CCT7	6840.36	8397.78	7212.94	7238.2	7563.51	8670.35	7068.85	8285.76
gRNA_NT54	na	3751.59	3456.25	3736.23	3339.83	2391.22	3519.28	4223.7	4088.14
SLC29A1_HEK293T_gRNA1446	SLC29A1	9000.23	8948.25	8154.21	7333.21	5988.15	15543.7	12804.8	8594.23
gRNA_NT84	na	7653.01	8040.34	7548.67	8001.5	10650.9	14345.1	12134.8	7385.14
RPS11_HEK293T_gRNA226	RPS11	7193.95	7849.96	7497.18	8186.59	5500.16	5569.34	6206.76	5534.32
CCT7_HEK293T_gRNA1431	CCT7	5525.51	7291.92	6218.12	6247.23	3861.46	5455.11	6023.36	8689.19
CNPY3_HEK293T_gRNA865	CNPY3	9414.94	8241.32	8436.38	8928.59	8229.01	14753.7	10408	8584.55
gRNA_NT75	na	4807.55	4694.71	5456.05	4931.94	9028.87	7868.96	8263.33	6460.34
gRNA_NT21	na	4566.63	5234.38	4430.34	7089.15	4722.58	6319.77	5590.99	8237.37
RPS6_HEK293T_gRNA442	RPS6	7839.99	7824.58	7814.36	7583.82	8441.33	9120.26	9961.02	12751.9
RPS11_HEK293T_gRNA367	RPS11	5797.59	5152.17	5114.14	5547.82	3142.35	3272.36	4054.19	3725.23
TERF2_HEK293T_gRNA494	TERF2	4299.35	4806.09	4354.13	4800.9	4295.85	4744.22	4428.96	4319.8
gRNA_NT7	na	5104.8	6047.77	6292.27	4766.5	6981.54	5752.11	8285.18	6240.17
CDC16_HEK293T_gRNA180	CDC16	6135.59	5603.38	6444.69	5854.12	4411.41	5814.5	7844.2	9369.64
GARS1_HEK293T_gRNA1283	GARS1	5362.5	6175.83	5935.95	4352.09	6867.37	9452.41	10925.1	9682.95
SLC35B1_HEK293T_gRNA675	SLC35B1	4341.3	5348.8	5412.8	4810.73	6934.9	7874.23	7764.08	6495.42
VCP_HEK293T_gRNA2241	VCP	7372.54	8115.35	6450.87	7066.22	5738.24	7501.65	5937.94	6349.65
AQR_HEK293T_gRNA1240	AQR	6306.99	6903.6	5845.33	7403.64	206.056	43.0574	2.6485	1016.14
EIF1AX_HEK293T_gRNA449	EIF1AX	6424.45	6889.39	7404.49	6194.81	6254.08	11956.8	10749.6	6845.02
TUBB_HEK293T_gRNA1494	TUBB	8406.92	6907.2	6568.27	8352.03	4496.34	2860.24	4405.78	2545.18
NIFK_HEK293T_gRNA737	NIFK	8144.43	7878.38	5915.35	8229.18	10816.5	8272.29	4098.56	11368
gRNA_NT60	na	5029.29	5737.31	5184.17	4627.27	6341.79	8184.42	7535.65	9711.37
SDF4_HEK293T_gRNA772	SDF4	5402.05	5716.09	5659.96	5248.07	1647.06	1416.5	10686	6623.04
UTP4_HEK293T_gRNA615	UTP4	9714.59	9227.27	9993.49	9390.5	10453.9	7404.99	11498.5	10368.8
CKAP5_HEK293T_gRNA4866	CKAP5	7467.23	7312	8193.34	7380.71	10821.4	11158.9	11848.1	9924.88
gRNA_NT94	na	3934.98	4292.37	4125.51	5284.1	6012.52	5669.51	5769.1	7308.33
RPP21_HEK293T_gRNA126	RPP21	10469.7	9967.17	8936.88	10289.7	13311.5	12019.2	9061.19	12405.3
gRNA_NT87	na	2264.14	3045.01	2840.28	3128.53	3843.36	2880.45	3383.46	4312.54
BUB1B_HEK293T_gRNA2803	BUB1B	5507.53	6914.39	6457.05	6180.07	2873.65	3277.63	3161.65	4513.95
VARS1_HEK293T_gRNA945	VARS1	10347.4	9615.03	10205.6	9971.98	2150.36	3065.86	4541.52	3579.47
SMU1_HEK293T_gRNA1008	SMU1	7507.98	7650.69	8125.37	8601	7893.47	10481.4	10458.3	12644.3
HDDC2_HEK293T_gRNA507	HDDC2	3708.44	4620.65	4642.48	5862.31	5288.54	6324.16	6303.43	8593.62
CCDC167_HEK293T_gRNA247	CCDC167	6587.46	6831.99	6572.39	6433.96	7051.15	12822.3	8793.69	10859.4
BUB1B_HEK293T_gRNA2032	BUB1B	5313.36	5987.92	6360.24	6083.43	2245.73	3379.57	3411.93	3256.48
TRAM1_HEK293T_gRNA550	TRAM1	7356.96	9001.48	7664.01	9664.04	8777.57	11989.3	9634.59	12453.7
MAT2A_HEK293T_gRNA718	MAT2A	3836.69	4661.18	4523.02	4271.83	2585.45	5472.68	4684.54	4391.17
LSM7_HEK293T_gRNA230	LSM7	5483.56	5656.8	5340.71	4987.63	1725.02	2606.29	944.191	917.548
RNF167_HEK293T_gRNA1310	RNF167	6509.55	6714.74	6343.76	5590.4	7514.78	7485.83	9813.36	8034.75
gRNA_NT26	na	7808.83	8112.13	7950.3	7909.77	7198.73	13476.1	8458.65	11316
COPB1_HEK293T_gRNA841	COPB1	7959.85	9104.34	7425.09	7367.6	807.517	2891.87	1146.8	725.208
PRELID3B_HEK293T_gRNA735	PRELID3B	8338.6	6799.41	9365.29	8463.41	6975.27	6389.19	12065.9	7835.75
SNRPD2_HEK293T_gRNA669	SNRPD2	7766.87	7272.6	7418.91	7981.84	2277.06	1542.16	2692.86	469.964
SYPL1_HEK293T_gRNA292	SYPL1	5049.67	5287.42	5048.24	4874.61	7132.6	6071.09	7841.55	7380.91
gRNA_NT80	na	3552.63	4195.58	5252.14	4712.45	3610.16	6386.55	9035.36	8767.21
EIF3D_HEK293T_gRNA1242	EIF3D	5483.56	6771.95	5573.45	4473.3	4515.13	5111.53	5131.47	5527.67
HDDC2_HEK293T_gRNA278	HDDC2	6464.01	6070.5	5808.25	6035.93	8361.28	7144.89	7791.89	10344.6
RPLP2_HEK293T_gRNA711	RPLP2	6503.56	6221.67	6222.24	6699.31	1965.19	1738.99	2057.22	849.806
HDDC2_HEK293T_gRNA259	HDDC2	4418.01	5195.55	5435.45	5513.42	4070.3	9192.31	9666.37	8485.96
RPS6_HEK293T_gRNA153	RPS6	5850.33	5725.56	5326.29	5139.96	1275.32	2411.21	1507	657.465
gRNA_NT31	na	4933.4	6011.97	6261.38	5436.43	8089.09	9790.72	8139.51	7581.72
RPLP2_HEK293T_gRNA548	RPLP2	5578.25	5617.02	5499.3	5655.92	1150.02	1045.68	1279.89	1564.13
PRPF8_HEK293T_gRNA4517	PRPF8	6816.39	6810.02	6166.63	6081.79	117.647	246.042	875.33	182.058
RPL17_HEK293T_gRNA247	RPL17	7682.97	6753.19	5682.61	5703.42	1285.07	50.0872	955.447	704.643
SBNO1_HEK293T_gRNA2184	SBNO1	5752.04	6148.17	6473.52	6963.02	8501.2	9428.69	9451.84	10105.1
TRAM1_HEK293T_gRNA515	TRAM1	5983.37	6562.63	6387.02	7269.33	8380.07	8308.32	7638.94	10232.7
gRNA_NT17	na	3719.23	4551.88	4450.93	3728.03	2903.58	7134.34	4143.58	4579.88
BOP1_HEK293T_gRNA2074	BOP1	8050.94	9653.1	9299.38	9477.31	2247.12	1617.73	2639.89	3833.5
CPSF1_HEK293T_gRNA1149	CPSF1	3706.05	3819.57	5260.38	4414.34	644.621	1186.27	1750	938.113
NUP93_HEK293T_gRNA812	NUP93	5072.44	5527.8	6405.55	5773.86	611.903	778.548	1546.06	1515.13
MLEC_HEK293T_gRNA694	MLEC	4364.07	4749.45	6181.05	5262.81	4279.14	7091.29	8771.18	7438.37
YAE1_HEK293T_gRNA655	YAE1	5886.28	6119.94	6442.63	5757.48	9060.2	7184.43	6866.24	7679.7
CSE1L_HEK293T_gRNA2715	CSE1L	5810.77	5449.76	4947.31	5085.91	1426.38	701.22	746.878	965.936
PSMA2_HEK293T_gRNA258	PSMA2	5990.56	6034.51	5917.41	6086.71	4112.77	3169.55	2617.38	3030.87
gRNA_NT10	na	2648.89	2959.77	3340.77	2131	3471.63	2063.24	3638.38	3006.07
gRNA_NT24	na	5596.22	5343.49	4008.11	5138.32	6986.41	2622.99	3164.3	5225.25
gRNA_NT25	na	4368.87	3979.82	5182.11	6204.64	7725.71	3879.56	6192.86	8752.09
