# Supplementary material for: Deciphering cellular context for efficient and cell type-specific CRISPR-Cas13d gRNA design using in vivo RNA structure and deep learning
Source: Research Square preprint supplement (doi:10.21203/rs.3.rs-7184055/v1), 2025-09-24
Supplement: Supplementary file 2 [file 4da0528cc9344cf6a7d49fa6.xlsx]

## Sheet: gRNA depletion
id	target_gene	Hela_LFC	A375_LFC
DARS1_HEK293T_gRNA727	DARS1	0.28617	0.63378
DARS1_HEK293T_gRNA1018	DARS1	-0.35674	-0.61646
DARS1_HEK293T_gRNA1449	DARS1	-2.0056	-1.2399
DARS1_HEK293T_gRNA1497	DARS1	0.40705	-0.090342
DARS1_HEK293T_gRNA1524	DARS1	-0.25085	-0.25088
DARS1_HEK293T_gRNA1531	DARS1	0.18418	0.39088
INTS11_HEK293T_gRNA357	INTS11	0.4315	0.3536
INTS11_HEK293T_gRNA397	INTS11	0.38779	0.38415
INTS11_HEK293T_gRNA520	INTS11	-0.42552	-0.12844
INTS11_HEK293T_gRNA630	INTS11	0.55075	0.38842
INTS11_HEK293T_gRNA646	INTS11	-0.73829	-0.14962
INTS11_HEK293T_gRNA903	INTS11	0.18464	0.23008
SPOUT1_HEK293T_gRNA498	SPOUT1	0.15556	0.4701
SPOUT1_HEK293T_gRNA532	SPOUT1	0.64259	0.5038
SPOUT1_HEK293T_gRNA852	SPOUT1	0.36298	0.17356
SPOUT1_HEK293T_gRNA952	SPOUT1	0.23965	0.66118
SPOUT1_HEK293T_gRNA1066	SPOUT1	0.55195	-0.15595
SPOUT1_HEK293T_gRNA1165	SPOUT1	0.3419	0.54514
CWC22_HEK293T_gRNA443	CWC22	-2.7463	-2.2738
CWC22_HEK293T_gRNA446	CWC22	-2.981	-2.4768
CWC22_HEK293T_gRNA761	CWC22	-0.022757	-0.16506
CWC22_HEK293T_gRNA914	CWC22	0.60324	0.50426
CWC22_HEK293T_gRNA1101	CWC22	-3.8276	-4.2995
CWC22_HEK293T_gRNA2064	CWC22	0.1977	0.25051
RUVBL2_HEK293T_gRNA594	RUVBL2	0.28301	0.21149
RUVBL2_HEK293T_gRNA673	RUVBL2	0.61993	0.63961
RUVBL2_HEK293T_gRNA867	RUVBL2	0.3277	0.30356
RUVBL2_HEK293T_gRNA1630	RUVBL2	0.45173	0.23692
RUVBL2_HEK293T_gRNA1698	RUVBL2	0.61504	0.32629
RUVBL2_HEK293T_gRNA1822	RUVBL2	0.37081	-0.1053
RPS6_HEK293T_gRNA111	RPS6	-3.2688	-1.6423
RPS6_HEK293T_gRNA147	RPS6	-2.6407	-1.2609
RPS6_HEK293T_gRNA153	RPS6	-1.4853	-2.0134
RPS6_HEK293T_gRNA281	RPS6	-3.6645	-4.2393
RPS6_HEK293T_gRNA442	RPS6	0.46921	0.26297
RPS6_HEK293T_gRNA469	RPS6	-3.7106	-1.8053
RPL17_HEK293T_gRNA132	RPL17	-3.9146	-3.1468
RPL17_HEK293T_gRNA133	RPL17	-1.7967	-1.6285
RPL17_HEK293T_gRNA243	RPL17	-2.616	-2.8873
RPL17_HEK293T_gRNA246	RPL17	-2.717	-5.089
RPL17_HEK293T_gRNA247	RPL17	-3.3485	-2.9427
RPL17_HEK293T_gRNA270	RPL17	-3.6347	-1.9836
HAUS7_HEK293T_gRNA245	HAUS7	0.28071	0.145
HAUS7_HEK293T_gRNA259	HAUS7	0.35184	-0.15256
HAUS7_HEK293T_gRNA392	HAUS7	0.50652	0.24482
HAUS7_HEK293T_gRNA904	HAUS7	0.27757	0.40734
HAUS7_HEK293T_gRNA1029	HAUS7	0.55626	0.41163
HAUS7_HEK293T_gRNA1057	HAUS7	0.57902	0.42568
RRM1_HEK293T_gRNA397	RRM1	0.12967	-2.1073
RRM1_HEK293T_gRNA1227	RRM1	-0.24806	-2.7176
RRM1_HEK293T_gRNA1333	RRM1	-1.5624	-3.6906
RRM1_HEK293T_gRNA1334	RRM1	0.16195	-2.1804
RRM1_HEK293T_gRNA1815	RRM1	-4.0197	-7.0409
RRM1_HEK293T_gRNA2284	RRM1	0.25494	-0.2847
PRC1_HEK293T_gRNA507	PRC1	-1.0064	-1.4497
PRC1_HEK293T_gRNA1446	PRC1	-0.36576	-0.38406
PRC1_HEK293T_gRNA1540	PRC1	-0.024329	0.15774
PRC1_HEK293T_gRNA1546	PRC1	-0.1009	0.16644
PRC1_HEK293T_gRNA1799	PRC1	0.39888	0.028853
PRC1_HEK293T_gRNA1801	PRC1	0.083543	-0.012347
TERF2_HEK293T_gRNA494	TERF2	0.020791	-0.093845
TERF2_HEK293T_gRNA575	TERF2	0.32558	0.33298
TERF2_HEK293T_gRNA619	TERF2	0.33515	0.53663
TERF2_HEK293T_gRNA708	TERF2	0.6924	0.42184
TERF2_HEK293T_gRNA1586	TERF2	0.36885	0.55982
TERF2_HEK293T_gRNA1590	TERF2	0.51759	0.14811
DDX23_HEK293T_gRNA1364	DDX23	-0.21473	-0.3039
DDX23_HEK293T_gRNA1564	DDX23	0.17167	0.083794
DDX23_HEK293T_gRNA1565	DDX23	0.45327	0.45369
DDX23_HEK293T_gRNA2235	DDX23	-1.3033	-1.1849
DDX23_HEK293T_gRNA2410	DDX23	0.14297	-0.066219
DDX23_HEK293T_gRNA2424	DDX23	0.39295	0.28663
TCP1_HEK293T_gRNA650	TCP1	0.41731	0.32592
TCP1_HEK293T_gRNA834	TCP1	0.36168	-0.10422
TCP1_HEK293T_gRNA1460	TCP1	-0.032369	0.46453
TCP1_HEK293T_gRNA1834	TCP1	-5.0397	-2.3375
TCP1_HEK293T_gRNA1835	TCP1	-3.1555	-1.0054
TCP1_HEK293T_gRNA1921	TCP1	-1.2869	-1.1626
IARS1_HEK293T_gRNA896	IARS1	0.27038	0.13419
IARS1_HEK293T_gRNA897	IARS1	0.10431	0.34947
IARS1_HEK293T_gRNA900	IARS1	-0.0023414	0.53784
IARS1_HEK293T_gRNA1173	IARS1	0.25679	0.060049
IARS1_HEK293T_gRNA3171	IARS1	0.13027	-0.26945
IARS1_HEK293T_gRNA3619	IARS1	-0.25842	-1.223
TIMM23_HEK293T_gRNA532	TIMM23	-2.0885	-0.63835
TIMM23_HEK293T_gRNA653	TIMM23	-0.095491	-0.17693
TIMM23_HEK293T_gRNA704	TIMM23	0.74297	0.30368
TIMM23_HEK293T_gRNA777	TIMM23	0.66772	0.38272
TIMM23_HEK293T_gRNA793	TIMM23	0.14508	0.19257
TIMM23_HEK293T_gRNA798	TIMM23	0.47501	0.19863
YJU2_HEK293T_gRNA201	YJU2	0.18635	-0.057272
YJU2_HEK293T_gRNA236	YJU2	0.55869	0.57881
YJU2_HEK293T_gRNA252	YJU2	0.26533	0.15573
YJU2_HEK293T_gRNA304	YJU2	0.31057	0.27487
YJU2_HEK293T_gRNA339	YJU2	0.4685	0.44352
YJU2_HEK293T_gRNA678	YJU2	0.2272	0.043987
HNRNPU_HEK293T_gRNA1138	HNRNPU	-3.3372	-3.4642
HNRNPU_HEK293T_gRNA1141	HNRNPU	0.61029	0.26273
HNRNPU_HEK293T_gRNA1257	HNRNPU	-0.97659	-1.0359
HNRNPU_HEK293T_gRNA1517	HNRNPU	-0.60802	-0.37058
HNRNPU_HEK293T_gRNA1779	HNRNPU	-0.79534	-0.36061
HNRNPU_HEK293T_gRNA2545	HNRNPU	-0.47092	-0.43822
RPS28_HEK293T_gRNA117	RPS28	-1.4441	-1.0196
RPS28_HEK293T_gRNA120	RPS28	0.073327	-0.56049
RPS28_HEK293T_gRNA213	RPS28	0.3063	0.26553
RPS28_HEK293T_gRNA214	RPS28	0.2098	0.17909
RPS28_HEK293T_gRNA226	RPS28	-0.34601	-1.3629
RPS28_HEK293T_gRNA230	RPS28	-3.5231	-2.0887
CNOT3_HEK293T_gRNA568	CNOT3	0.42121	0.27159
CNOT3_HEK293T_gRNA1010	CNOT3	0.28871	0.070381
CNOT3_HEK293T_gRNA1190	CNOT3	0.46848	0.31046
CNOT3_HEK293T_gRNA1194	CNOT3	0.54429	0.43885
CNOT3_HEK293T_gRNA2187	CNOT3	0.54431	0.32265
CNOT3_HEK293T_gRNA2462	CNOT3	0.18721	0.2244
PRELID3B_HEK293T_gRNA183	PRELID3B	0.21594	0.56449
PRELID3B_HEK293T_gRNA188	PRELID3B	-1.3277	0.059221
PRELID3B_HEK293T_gRNA570	PRELID3B	-0.34948	0.24207
PRELID3B_HEK293T_gRNA642	PRELID3B	-0.071211	0.2397
PRELID3B_HEK293T_gRNA645	PRELID3B	0.33797	0.17829
PRELID3B_HEK293T_gRNA735	PRELID3B	-0.61262	-0.2119
SMU1_HEK293T_gRNA307	SMU1	-3.345	-2.1649
SMU1_HEK293T_gRNA378	SMU1	-0.76696	-1.4361
SMU1_HEK293T_gRNA564	SMU1	-0.16891	-0.4017
SMU1_HEK293T_gRNA665	SMU1	-3.5859	-1.2286
SMU1_HEK293T_gRNA848	SMU1	-2.4978	-2.2821
SMU1_HEK293T_gRNA1008	SMU1	0.40936	0.38423
CSE1L_HEK293T_gRNA524	CSE1L	-4.947	-3.2689
CSE1L_HEK293T_gRNA981	CSE1L	-3.722	-2.3393
CSE1L_HEK293T_gRNA1747	CSE1L	-1.4949	-1.373
CSE1L_HEK293T_gRNA1952	CSE1L	-3.4423	-3.4531
CSE1L_HEK293T_gRNA2393	CSE1L	-3.7357	-1.7203
CSE1L_HEK293T_gRNA2715	CSE1L	-3.4724	-2.6578
WDR75_HEK293T_gRNA382	WDR75	-3.8426	-2.8826
WDR75_HEK293T_gRNA525	WDR75	-4.3156	-3.7618
WDR75_HEK293T_gRNA567	WDR75	-4.5063	-2.5617
WDR75_HEK293T_gRNA852	WDR75	-0.91307	-1.4974
WDR75_HEK293T_gRNA854	WDR75	-3.4098	-3.0413
WDR75_HEK293T_gRNA857	WDR75	-3.0227	-2.0504
YAE1_HEK293T_gRNA193	YAE1	0.33215	0.1897
YAE1_HEK293T_gRNA194	YAE1	-0.18047	0.33792
YAE1_HEK293T_gRNA195	YAE1	-0.36294	0.087133
YAE1_HEK293T_gRNA196	YAE1	0.44145	0.53203
YAE1_HEK293T_gRNA246	YAE1	0.34262	0.36414
YAE1_HEK293T_gRNA655	YAE1	-0.071516	0.28056
CCT2_HEK293T_gRNA255	CCT2	-0.052074	0.074621
CCT2_HEK293T_gRNA258	CCT2	0.40362	0.45105
CCT2_HEK293T_gRNA591	CCT2	0.048537	0.060175
CCT2_HEK293T_gRNA960	CCT2	-2.328	-0.80787
CCT2_HEK293T_gRNA1081	CCT2	-0.73715	-0.12788
CCT2_HEK293T_gRNA1737	CCT2	-0.14886	0.064889
NARS1_HEK293T_gRNA936	NARS1	-0.97104	-0.11172
NARS1_HEK293T_gRNA1199	NARS1	0.32968	0.38908
NARS1_HEK293T_gRNA1240	NARS1	0.1682	-0.051319
NARS1_HEK293T_gRNA1738	NARS1	-2.2872	-1.1944
NARS1_HEK293T_gRNA1800	NARS1	-0.36801	-0.62759
NARS1_HEK293T_gRNA1808	NARS1	0.26209	0.18977
COPA_HEK293T_gRNA585	COPA	0.25276	-0.60329
COPA_HEK293T_gRNA1867	COPA	0.15897	-0.22472
COPA_HEK293T_gRNA3211	COPA	0.45013	-1.4661
COPA_HEK293T_gRNA3689	COPA	-2.7476	-5.9456
COPA_HEK293T_gRNA3712	COPA	-0.15215	-1.4715
COPA_HEK293T_gRNA3781	COPA	-0.039329	-1.2339
PSMA2_HEK293T_gRNA245	PSMA2	0.33006	-0.14811
PSMA2_HEK293T_gRNA258	PSMA2	-0.21684	-0.98205
PSMA2_HEK293T_gRNA361	PSMA2	0.043027	-1.4109
PSMA2_HEK293T_gRNA392	PSMA2	-1.5859	-1.7358
PSMA2_HEK293T_gRNA696	PSMA2	-0.58823	-0.76623
PSMA2_HEK293T_gRNA708	PSMA2	-1.2046	-0.86672
POLA1_HEK293T_gRNA746	POLA1	0.066617	-1.7415
POLA1_HEK293T_gRNA2175	POLA1	0.38659	-0.70853
POLA1_HEK293T_gRNA2466	POLA1	-3.9359	-3.5397
POLA1_HEK293T_gRNA3248	POLA1	-0.042346	-1.0307
POLA1_HEK293T_gRNA4232	POLA1	-0.93935	-2.1844
POLA1_HEK293T_gRNA4267	POLA1	0.28163	-0.30698
PRPF8_HEK293T_gRNA3114	PRPF8	-3.6123	-2.7838
PRPF8_HEK293T_gRNA4517	PRPF8	-4.0998	-4.943
PRPF8_HEK293T_gRNA5243	PRPF8	-0.27745	-0.75406
PRPF8_HEK293T_gRNA5343	PRPF8	-3.6941	-3.3
PRPF8_HEK293T_gRNA5348	PRPF8	-0.45407	-1.1608
PRPF8_HEK293T_gRNA6168	PRPF8	-0.016019	-0.65517
DDX27_HEK293T_gRNA677	DDX27	-1.0882	-0.48325
DDX27_HEK293T_gRNA770	DDX27	-0.050861	-0.17928
DDX27_HEK293T_gRNA1291	DDX27	0.45054	0.49131
DDX27_HEK293T_gRNA1428	DDX27	-1.7547	-0.90869
DDX27_HEK293T_gRNA1483	DDX27	-0.15243	-0.27116
DDX27_HEK293T_gRNA2076	DDX27	0.28019	0.45967
GTPBP4_HEK293T_gRNA1021	GTPBP4	-1.6489	-1.3636
GTPBP4_HEK293T_gRNA1024	GTPBP4	0.20459	0.27616
GTPBP4_HEK293T_gRNA1055	GTPBP4	-0.12513	-0.28169
GTPBP4_HEK293T_gRNA1056	GTPBP4	-2.8842	-2.7031
GTPBP4_HEK293T_gRNA1400	GTPBP4	0.39593	-0.40115
GTPBP4_HEK293T_gRNA2355	GTPBP4	0.5833	0.67693
PAM16_HEK293T_gRNA169	PAM16	0.73289	0.35912
PAM16_HEK293T_gRNA170	PAM16	0.40033	0.25304
PAM16_HEK293T_gRNA175	PAM16	0.31536	0.39523
PAM16_HEK293T_gRNA259	PAM16	0.34962	0.19551
PAM16_HEK293T_gRNA327	PAM16	0.2882	0.28068
PAM16_HEK293T_gRNA351	PAM16	0.42697	0.31907
EIF3B_HEK293T_gRNA874	EIF3B	-3.964	-1.9784
EIF3B_HEK293T_gRNA876	EIF3B	-3.78	-1.8654
EIF3B_HEK293T_gRNA961	EIF3B	-5.1694	-2.1653
EIF3B_HEK293T_gRNA1590	EIF3B	-2.9954	-1.4783
EIF3B_HEK293T_gRNA2082	EIF3B	-1.6438	-1.3724
EIF3B_HEK293T_gRNA2083	EIF3B	-2.6214	-1.1642
SARS1_HEK293T_gRNA76	SARS1	-1.0794	-0.097477
SARS1_HEK293T_gRNA194	SARS1	0.35889	0.10992
SARS1_HEK293T_gRNA349	SARS1	0.1569	0.11195
SARS1_HEK293T_gRNA1108	SARS1	0.24964	0.56609
SARS1_HEK293T_gRNA1185	SARS1	-3.9631	-2.0931
SARS1_HEK293T_gRNA1586	SARS1	0.19424	0.15004
ARCN1_HEK293T_gRNA247	ARCN1	-4.5077	-2.6468
ARCN1_HEK293T_gRNA359	ARCN1	-0.32625	-0.46807
ARCN1_HEK293T_gRNA360	ARCN1	-1.4389	-1.3496
ARCN1_HEK293T_gRNA403	ARCN1	-3.0407	-2.6425
ARCN1_HEK293T_gRNA950	ARCN1	-3.5094	-3.1397
ARCN1_HEK293T_gRNA1194	ARCN1	-0.1804	0.23817
CKAP5_HEK293T_gRNA1892	CKAP5	-3.3483	-3.559
CKAP5_HEK293T_gRNA3073	CKAP5	0.41036	0.052551
CKAP5_HEK293T_gRNA4866	CKAP5	0.61467	0.55078
CKAP5_HEK293T_gRNA5748	CKAP5	0.27079	0.4472
CKAP5_HEK293T_gRNA6087	CKAP5	-0.055806	0.058115
CKAP5_HEK293T_gRNA6131	CKAP5	-0.0055239	-0.35559
GARS1_HEK293T_gRNA1265	GARS1	0.31126	0.39654
GARS1_HEK293T_gRNA1281	GARS1	-1.7469	-1.3554
GARS1_HEK293T_gRNA1283	GARS1	0.07288	0.72955
GARS1_HEK293T_gRNA1293	GARS1	0.1773	0.042259
GARS1_HEK293T_gRNA1341	GARS1	-3.1214	-2.0789
GARS1_HEK293T_gRNA1342	GARS1	-2.8949	-2.1264
CIAO3_HEK293T_gRNA260	CIAO3	0.58704	0.25454
CIAO3_HEK293T_gRNA392	CIAO3	0.73669	0.59107
CIAO3_HEK293T_gRNA417	CIAO3	0.056599	0.35968
CIAO3_HEK293T_gRNA907	CIAO3	0.37217	0.22342
CIAO3_HEK293T_gRNA1150	CIAO3	-0.057564	-0.11416
CIAO3_HEK293T_gRNA1396	CIAO3	0.32835	0.56828
TSG101_HEK293T_gRNA467	TSG101	-3.2262	-2.0893
TSG101_HEK293T_gRNA468	TSG101	0.41504	0.52635
TSG101_HEK293T_gRNA478	TSG101	-3.649	-2.153
TSG101_HEK293T_gRNA573	TSG101	0.50129	0.53315
TSG101_HEK293T_gRNA630	TSG101	0.62353	0.3248
TSG101_HEK293T_gRNA1395	TSG101	0.2053	0.53713
RAN_HEK293T_gRNA375	RAN	0.09153	-2.5132
RAN_HEK293T_gRNA474	RAN	-4.7868	-3.2106
RAN_HEK293T_gRNA574	RAN	0.32792	-1.1275
RAN_HEK293T_gRNA767	RAN	-3.1173	-2.1102
RAN_HEK293T_gRNA848	RAN	-0.71005	-2.4656
RAN_HEK293T_gRNA863	RAN	-0.43424	-1.6635
WARS1_HEK293T_gRNA1140	WARS1	0.40544	0.68543
WARS1_HEK293T_gRNA1141	WARS1	0.39859	0.37951
WARS1_HEK293T_gRNA1331	WARS1	0.014061	-0.93506
WARS1_HEK293T_gRNA1359	WARS1	0.011911	0.098863
WARS1_HEK293T_gRNA1621	WARS1	0.53784	0.6997
WARS1_HEK293T_gRNA1668	WARS1	0.55433	0.64247
RACK1_HEK293T_gRNA574	RACK1	-5.0469	-2.056
RACK1_HEK293T_gRNA725	RACK1	-2.6344	-0.91151
RACK1_HEK293T_gRNA726	RACK1	-3.2376	-2.488
RACK1_HEK293T_gRNA1232	RACK1	-1.6697	-0.60126
RACK1_HEK293T_gRNA1233	RACK1	-2.4418	-1.2486
RACK1_HEK293T_gRNA1316	RACK1	-0.041062	0.014472
RPS11_HEK293T_gRNA226	RPS11	-0.54577	-0.48658
RPS11_HEK293T_gRNA331	RPS11	0.1775	-0.11091
RPS11_HEK293T_gRNA349	RPS11	0.015935	0.091796
RPS11_HEK293T_gRNA364	RPS11	-1.6082	-1.5549
RPS11_HEK293T_gRNA367	RPS11	0.036948	-0.64287
RPS11_HEK293T_gRNA394	RPS11	-2.014	-1.6259
NIFK_HEK293T_gRNA213	NIFK	0.23406	0.50132
NIFK_HEK293T_gRNA328	NIFK	-0.10711	-0.62634
NIFK_HEK293T_gRNA330	NIFK	-1.7848	-0.92223
NIFK_HEK293T_gRNA737	NIFK	0.35269	0.24016
NIFK_HEK293T_gRNA738	NIFK	0.3474	0.42308
NIFK_HEK293T_gRNA817	NIFK	-1.6298	-1.4699
UTP4_HEK293T_gRNA218	UTP4	0.45402	0.10965
UTP4_HEK293T_gRNA308	UTP4	0.18928	-0.20848
UTP4_HEK293T_gRNA615	UTP4	0.074699	0.09519
UTP4_HEK293T_gRNA1603	UTP4	0.57506	0.54841
UTP4_HEK293T_gRNA1738	UTP4	-0.14101	-0.19732
UTP4_HEK293T_gRNA1739	UTP4	0.063839	-0.052181
BUB1B_HEK293T_gRNA472	BUB1B	0.50752	0.58089
BUB1B_HEK293T_gRNA666	BUB1B	0.55488	0.11262
BUB1B_HEK293T_gRNA762	BUB1B	0.058374	-1.4628
BUB1B_HEK293T_gRNA2032	BUB1B	-0.047438	-0.89355
BUB1B_HEK293T_gRNA2389	BUB1B	0.67003	0.52344
BUB1B_HEK293T_gRNA2803	BUB1B	0.6007	-0.99911
SNRNP200_HEK293T_gRNA1625	SNRNP200	-5.3803	-2.7756
SNRNP200_HEK293T_gRNA1818	SNRNP200	-4.8447	-2.9185
SNRNP200_HEK293T_gRNA4020	SNRNP200	-4.1735	-7.3499
SNRNP200_HEK293T_gRNA4100	SNRNP200	-4.2249	-3.9228
SNRNP200_HEK293T_gRNA5995	SNRNP200	-3.4241	-4.0044
SNRNP200_HEK293T_gRNA6096	SNRNP200	-3.2589	-3.3081
RPA1_HEK293T_gRNA236	RPA1	-3.2718	-2.3703
RPA1_HEK293T_gRNA266	RPA1	0.037075	-2.0604
RPA1_HEK293T_gRNA281	RPA1	0.32878	-0.45194
RPA1_HEK293T_gRNA334	RPA1	-2.7125	-2.9217
RPA1_HEK293T_gRNA830	RPA1	-0.19891	-0.072659
RPA1_HEK293T_gRNA1900	RPA1	0.36659	-0.68705
PSMA6_HEK293T_gRNA238	PSMA6	-0.899	-1.2102
PSMA6_HEK293T_gRNA352	PSMA6	0.14688	-0.19639
PSMA6_HEK293T_gRNA355	PSMA6	-3.0324	-1.841
PSMA6_HEK293T_gRNA356	PSMA6	-0.10405	-1.0186
PSMA6_HEK293T_gRNA434	PSMA6	0.2413	-0.71993
PSMA6_HEK293T_gRNA718	PSMA6	0.47823	-0.86632
EPRS1_HEK293T_gRNA2538	EPRS1	-0.25151	0.071532
EPRS1_HEK293T_gRNA3493	EPRS1	-0.19174	-0.27171
EPRS1_HEK293T_gRNA3494	EPRS1	-2.3216	-0.98525
EPRS1_HEK293T_gRNA3496	EPRS1	0.49822	0.40791
EPRS1_HEK293T_gRNA3756	EPRS1	0.055999	-0.75638
EPRS1_HEK293T_gRNA4178	EPRS1	0.11831	0.11282
LSM7_HEK293T_gRNA79	LSM7	0.36282	0.33161
LSM7_HEK293T_gRNA82	LSM7	0.52565	0.21989
LSM7_HEK293T_gRNA108	LSM7	0.38634	0.54175
LSM7_HEK293T_gRNA215	LSM7	0.18582	-1.5198
LSM7_HEK293T_gRNA230	LSM7	-2.1443	-2.0403
LSM7_HEK293T_gRNA233	LSM7	0.054913	-1.2131
CDC5L_HEK293T_gRNA994	CDC5L	-1.8703	-1.4358
CDC5L_HEK293T_gRNA1001	CDC5L	0.066809	0.454
CDC5L_HEK293T_gRNA1293	CDC5L	-4.2838	-2.501
CDC5L_HEK293T_gRNA1323	CDC5L	0.30763	-1.8185
CDC5L_HEK293T_gRNA1839	CDC5L	-1.8942	-1.7631
CDC5L_HEK293T_gRNA2127	CDC5L	-4.1276	-3.1659
CFAP298_HEK293T_gRNA869	CFAP298	0.275	0.30337
CFAP298_HEK293T_gRNA1068	CFAP298	0.49832	0.50457
CFAP298_HEK293T_gRNA1177	CFAP298	0.71434	0.21445
CFAP298_HEK293T_gRNA1178	CFAP298	0.63116	-0.0029847
CFAP298_HEK293T_gRNA1427	CFAP298	0.18573	0.38793
CFAP298_HEK293T_gRNA1482	CFAP298	0.71962	0.50704
SNU13_HEK293T_gRNA318	SNU13	0.6325	0.57201
SNU13_HEK293T_gRNA391	SNU13	0.1218	-0.68356
SNU13_HEK293T_gRNA503	SNU13	0.35034	-1.0528
SNU13_HEK293T_gRNA659	SNU13	-3.9001	-4.6602
SNU13_HEK293T_gRNA660	SNU13	0.37162	-0.098205
SNU13_HEK293T_gRNA676	SNU13	0.42347	0.29986
SRRT_HEK293T_gRNA644	SRRT	-0.14263	0.31689
SRRT_HEK293T_gRNA1098	SRRT	-2.4152	-0.90588
SRRT_HEK293T_gRNA1223	SRRT	0.14034	0.29718
SRRT_HEK293T_gRNA1235	SRRT	0.26363	0.46196
SRRT_HEK293T_gRNA2364	SRRT	-0.10665	0.3615
SRRT_HEK293T_gRNA2411	SRRT	0.39593	0.48581
NOP16_HEK293T_gRNA666	NOP16	0.48667	-0.089702
NOP16_HEK293T_gRNA667	NOP16	0.40934	0.064685
NOP16_HEK293T_gRNA765	NOP16	-0.033732	0.31901
NOP16_HEK293T_gRNA766	NOP16	0.11263	0.18573
NOP16_HEK293T_gRNA790	NOP16	0.29515	0.24386
NOP16_HEK293T_gRNA916	NOP16	0.33224	0.65308
MCM3AP_HEK293T_gRNA109	MCM3AP	0.48676	0.43616
MCM3AP_HEK293T_gRNA178	MCM3AP	0.41404	0.1842
MCM3AP_HEK293T_gRNA1439	MCM3AP	0.39119	0.29757
MCM3AP_HEK293T_gRNA2371	MCM3AP	0.12154	0.1543
MCM3AP_HEK293T_gRNA2480	MCM3AP	0.43341	0.55304
MCM3AP_HEK293T_gRNA2505	MCM3AP	0.089632	0.029922
GMPPB_HEK293T_gRNA275	GMPPB	0.36985	0.37745
GMPPB_HEK293T_gRNA548	GMPPB	0.57365	0.3739
GMPPB_HEK293T_gRNA549	GMPPB	0.56675	0.46018
GMPPB_HEK293T_gRNA552	GMPPB	0.64901	0.51105
GMPPB_HEK293T_gRNA1193	GMPPB	0.051474	0.28642
GMPPB_HEK293T_gRNA1247	GMPPB	-0.068477	0.2553
EIF3D_HEK293T_gRNA842	EIF3D	0.18872	-0.49854
EIF3D_HEK293T_gRNA935	EIF3D	0.11708	-0.38571
EIF3D_HEK293T_gRNA1242	EIF3D	0.33127	-0.13478
EIF3D_HEK293T_gRNA1495	EIF3D	-3.3688	-1.7501
EIF3D_HEK293T_gRNA1679	EIF3D	-2.7051	-1.3013
EIF3D_HEK293T_gRNA1844	EIF3D	-2.2671	-1.0195
HYOU1_HEK293T_gRNA369	HYOU1	0.40369	0.037911
HYOU1_HEK293T_gRNA373	HYOU1	-1.9113	-0.87598
HYOU1_HEK293T_gRNA520	HYOU1	0.2789	0.45494
HYOU1_HEK293T_gRNA691	HYOU1	0.20584	0.34016
HYOU1_HEK293T_gRNA1555	HYOU1	0.44196	0.36188
HYOU1_HEK293T_gRNA1582	HYOU1	-0.93688	-0.73476
DYNC1H1_HEK293T_gRNA734	DYNC1H1	-1.9324	-1.3533
DYNC1H1_HEK293T_gRNA2894	DYNC1H1	-0.41648	0.0094618
DYNC1H1_HEK293T_gRNA5684	DYNC1H1	-4.025	-1.9361
DYNC1H1_HEK293T_gRNA9757	DYNC1H1	0.26924	0.42109
DYNC1H1_HEK293T_gRNA10775	DYNC1H1	-2.7296	-1.5004
DYNC1H1_HEK293T_gRNA13057	DYNC1H1	-1.8305	-0.1986
NUP93_HEK293T_gRNA812	NUP93	-0.76908	-2.3337
NUP93_HEK293T_gRNA1517	NUP93	-3.1932	-2.304
NUP93_HEK293T_gRNA1990	NUP93	0.061546	-0.49229
NUP93_HEK293T_gRNA2022	NUP93	0.52075	-0.024912
NUP93_HEK293T_gRNA2024	NUP93	0.39661	0.04632
NUP93_HEK293T_gRNA2173	NUP93	0.15498	-1.5546
MARS1_HEK293T_gRNA518	MARS1	0.055898	0.54547
MARS1_HEK293T_gRNA1138	MARS1	0.62298	0.39861
MARS1_HEK293T_gRNA1153	MARS1	0.63298	0.32552
MARS1_HEK293T_gRNA1888	MARS1	0.43055	0.66165
MARS1_HEK293T_gRNA1921	MARS1	0.42776	0.15986
MARS1_HEK293T_gRNA2226	MARS1	0.31135	0.014346
RPLP2_HEK293T_gRNA477	RPLP2	-3.0638	-1.807
RPLP2_HEK293T_gRNA498	RPLP2	-3.3056	-2.1174
RPLP2_HEK293T_gRNA501	RPLP2	-3.0719	-2.5374
RPLP2_HEK293T_gRNA548	RPLP2	-3.9617	-2.2242
RPLP2_HEK293T_gRNA711	RPLP2	-1.9929	-1.7955
RPLP2_HEK293T_gRNA713	RPLP2	-1.9478	-1.589
NUP133_HEK293T_gRNA557	NUP133	0.17551	0.0071836
NUP133_HEK293T_gRNA1354	NUP133	-1.8622	-1.2862
NUP133_HEK293T_gRNA1371	NUP133	-3.3502	-2.2537
NUP133_HEK293T_gRNA1462	NUP133	-4.8942	-2.4721
NUP133_HEK293T_gRNA2954	NUP133	-2.5686	-2.0103
NUP133_HEK293T_gRNA3018	NUP133	-2.5934	-1.8972
TRRAP_HEK293T_gRNA1651	TRRAP	-1.7529	-0.73593
TRRAP_HEK293T_gRNA2597	TRRAP	0.14298	0.034314
TRRAP_HEK293T_gRNA3155	TRRAP	-0.0056531	0.2241
TRRAP_HEK293T_gRNA3386	TRRAP	-2.4056	-1.085
TRRAP_HEK293T_gRNA8338	TRRAP	-0.41164	-0.49565
TRRAP_HEK293T_gRNA9677	TRRAP	0.73635	0.69701
YARS1_HEK293T_gRNA1027	YARS1	0.2716	0.27678
YARS1_HEK293T_gRNA1205	YARS1	0.85971	0.57369
YARS1_HEK293T_gRNA1219	YARS1	0.27648	0.26557
YARS1_HEK293T_gRNA1549	YARS1	-0.078309	0.43179
YARS1_HEK293T_gRNA1564	YARS1	0.44785	0.43732
YARS1_HEK293T_gRNA1685	YARS1	0.33637	0.53058
RPL30_HEK293T_gRNA184	RPL30	-3.966	-1.9559
RPL30_HEK293T_gRNA195	RPL30	-3.8398	-3.2474
RPL30_HEK293T_gRNA207	RPL30	-1.3984	-1.6064
RPL30_HEK293T_gRNA248	RPL30	0.15846	0.53641
RPL30_HEK293T_gRNA321	RPL30	-3.9065	-4.8549
RPL30_HEK293T_gRNA381	RPL30	-3.6295	-2.9332
CIAO2B_HEK293T_gRNA214	CIAO2B	0.028471	0.43984
CIAO2B_HEK293T_gRNA245	CIAO2B	0.27178	0.56566
CIAO2B_HEK293T_gRNA385	CIAO2B	0.14852	0.22765
CIAO2B_HEK293T_gRNA389	CIAO2B	0.39116	0.60652
CIAO2B_HEK293T_gRNA423	CIAO2B	0.17845	0.51289
CIAO2B_HEK293T_gRNA437	CIAO2B	0.791	0.72949
PPP3R1_HEK293T_gRNA435	PPP3R1	0.38788	0.08564
PPP3R1_HEK293T_gRNA436	PPP3R1	0.31971	0.42055
PPP3R1_HEK293T_gRNA520	PPP3R1	0.47802	0.27048
PPP3R1_HEK293T_gRNA667	PPP3R1	0.40014	0.071302
PPP3R1_HEK293T_gRNA862	PPP3R1	0.22684	0.3236
PPP3R1_HEK293T_gRNA901	PPP3R1	-0.78237	0.0022962
COPG1_HEK293T_gRNA403	COPG1	0.31991	-1.1224
COPG1_HEK293T_gRNA526	COPG1	-0.7283	-2.3045
COPG1_HEK293T_gRNA1098	COPG1	0.53801	-0.38433
COPG1_HEK293T_gRNA1168	COPG1	0.25634	-1.8916
COPG1_HEK293T_gRNA1635	COPG1	-3.7833	-2.857
COPG1_HEK293T_gRNA2323	COPG1	-1.888	-1.5353
DDX47_HEK293T_gRNA201	DDX47	0.061119	-0.033275
DDX47_HEK293T_gRNA419	DDX47	0.56829	0.24418
DDX47_HEK293T_gRNA684	DDX47	-0.21923	0.15041
DDX47_HEK293T_gRNA863	DDX47	0.30401	0.2901
DDX47_HEK293T_gRNA864	DDX47	-0.39222	-0.018281
DDX47_HEK293T_gRNA865	DDX47	-3.1337	-1.3047
COPB1_HEK293T_gRNA841	COPB1	0.19681	-3.0009
COPB1_HEK293T_gRNA944	COPB1	-0.23937	-3.5636
COPB1_HEK293T_gRNA1033	COPB1	-2.6031	-5.6022
COPB1_HEK293T_gRNA1034	COPB1	0.30262	-1.6859
COPB1_HEK293T_gRNA1085	COPB1	-4.2423	-2.5468
COPB1_HEK293T_gRNA1386	COPB1	-2.8153	-3.3862
TUBA1B_HEK293T_gRNA231	TUBA1B	-2.65	-0.38472
TUBA1B_HEK293T_gRNA386	TUBA1B	-0.99098	-0.54011
TUBA1B_HEK293T_gRNA556	TUBA1B	-2.9189	-0.9398
TUBA1B_HEK293T_gRNA703	TUBA1B	-4.7787	-2.3515
TUBA1B_HEK293T_gRNA1104	TUBA1B	0.41876	0.39535
TUBA1B_HEK293T_gRNA1105	TUBA1B	-0.93815	-0.020712
RPL10_HEK293T_gRNA617	RPL10	-3.557	-2.5202
RPL10_HEK293T_gRNA622	RPL10	-1.9103	-0.60286
RPL10_HEK293T_gRNA623	RPL10	-2.0355	-1.2313
RPL10_HEK293T_gRNA722	RPL10	-1.0872	-0.29315
RPL10_HEK293T_gRNA822	RPL10	-3.0714	-2.2582
RPL10_HEK293T_gRNA825	RPL10	-4.2876	-2.2911
KPNB1_HEK293T_gRNA702	KPNB1	0.57851	0.55025
KPNB1_HEK293T_gRNA1301	KPNB1	-4.0041	-1.7023
KPNB1_HEK293T_gRNA1555	KPNB1	-1.5315	-0.53005
KPNB1_HEK293T_gRNA1558	KPNB1	0.087487	0.18962
KPNB1_HEK293T_gRNA1930	KPNB1	0.44479	0.297
KPNB1_HEK293T_gRNA2189	KPNB1	-0.41236	-0.73602
BUD23_HEK293T_gRNA135	BUD23	-0.079433	0.11198
BUD23_HEK293T_gRNA223	BUD23	0.34489	0.31638
BUD23_HEK293T_gRNA236	BUD23	0.58939	-0.67393
BUD23_HEK293T_gRNA237	BUD23	0.52204	0.26438
BUD23_HEK293T_gRNA241	BUD23	-2.2124	-0.79807
BUD23_HEK293T_gRNA279	BUD23	0.21318	0.15326
SF3A3_HEK293T_gRNA1072	SF3A3	0.46189	0.13946
SF3A3_HEK293T_gRNA1439	SF3A3	0.36735	0.46345
SF3A3_HEK293T_gRNA2041	SF3A3	0.10646	-0.063112
SF3A3_HEK293T_gRNA2299	SF3A3	-1.1	-0.81381
SF3A3_HEK293T_gRNA2300	SF3A3	-1.0704	-0.67465
SF3A3_HEK293T_gRNA2453	SF3A3	-1.9003	-1.8846
SF3B1_HEK293T_gRNA224	SF3B1	-3.4126	-3.061
SF3B1_HEK293T_gRNA1902	SF3B1	-4.9774	-4.5773
SF3B1_HEK293T_gRNA1903	SF3B1	-3.8142	-3.2384
SF3B1_HEK293T_gRNA3046	SF3B1	0.21673	-0.21375
SF3B1_HEK293T_gRNA3061	SF3B1	-1.5848	-1.6192
SF3B1_HEK293T_gRNA3315	SF3B1	-3.0449	-2.713
CDC16_HEK293T_gRNA180	CDC16	0.48032	0.1629
CDC16_HEK293T_gRNA587	CDC16	0.013416	0.060133
CDC16_HEK293T_gRNA800	CDC16	-1.1786	0.32904
CDC16_HEK293T_gRNA853	CDC16	-2.7518	-0.19581
CDC16_HEK293T_gRNA892	CDC16	-1.3028	-0.18825
CDC16_HEK293T_gRNA1105	CDC16	-0.68005	0.10177
CPSF1_HEK293T_gRNA713	CPSF1	0.45219	-0.079869
CPSF1_HEK293T_gRNA1149	CPSF1	-2.8393	-1.9814
CPSF1_HEK293T_gRNA1150	CPSF1	-3.3851	-1.729
CPSF1_HEK293T_gRNA1496	CPSF1	0.35668	0.46073
CPSF1_HEK293T_gRNA1684	CPSF1	0.30601	0.16721
CPSF1_HEK293T_gRNA3856	CPSF1	-2.4134	-1.2751
XPO1_HEK293T_gRNA1398	XPO1	-4.5246	-2.7538
XPO1_HEK293T_gRNA1890	XPO1	-2.5832	-1.634
XPO1_HEK293T_gRNA2515	XPO1	0.27825	0.61782
XPO1_HEK293T_gRNA3284	XPO1	-3.4842	-1.5172
XPO1_HEK293T_gRNA3286	XPO1	-4.8406	-4.2264
XPO1_HEK293T_gRNA3397	XPO1	-0.58131	-0.81264
U2AF2_HEK293T_gRNA252	U2AF2	0.35705	0.20776
U2AF2_HEK293T_gRNA361	U2AF2	0.25868	0.37125
U2AF2_HEK293T_gRNA365	U2AF2	0.19583	0.41666
U2AF2_HEK293T_gRNA1167	U2AF2	0.38779	0.034033
U2AF2_HEK293T_gRNA1253	U2AF2	-2.689	-2.1165
U2AF2_HEK293T_gRNA1254	U2AF2	-0.0035365	-0.43599
EFTUD2_HEK293T_gRNA417	EFTUD2	-4.1827	-3.4638
EFTUD2_HEK293T_gRNA420	EFTUD2	-3.4878	-3.7137
EFTUD2_HEK293T_gRNA611	EFTUD2	0.27244	-0.086542
EFTUD2_HEK293T_gRNA674	EFTUD2	-3.5734	-4.2043
EFTUD2_HEK293T_gRNA846	EFTUD2	-3.6891	-4.0887
EFTUD2_HEK293T_gRNA987	EFTUD2	-0.094261	-1.1682
NEDD8_HEK293T_gRNA254	NEDD8	0.5936	0.39115
NEDD8_HEK293T_gRNA306	NEDD8	-0.97215	0.053716
NEDD8_HEK293T_gRNA309	NEDD8	-0.37223	0.28369
NEDD8_HEK293T_gRNA322	NEDD8	-1.2746	0.12806
NEDD8_HEK293T_gRNA323	NEDD8	0.092017	0.51353
NEDD8_HEK293T_gRNA339	NEDD8	0.71219	0.2257
UFD1_HEK293T_gRNA198	UFD1	0.26463	0.22179
UFD1_HEK293T_gRNA505	UFD1	0.54973	0.67626
UFD1_HEK293T_gRNA531	UFD1	0.2926	0.54632
UFD1_HEK293T_gRNA631	UFD1	0.22549	0.27069
UFD1_HEK293T_gRNA681	UFD1	0.15634	0.70583
UFD1_HEK293T_gRNA989	UFD1	0.26265	0.17974
SLC35B1_HEK293T_gRNA561	SLC35B1	0.67385	0.40396
SLC35B1_HEK293T_gRNA626	SLC35B1	0.27754	0.032262
SLC35B1_HEK293T_gRNA675	SLC35B1	0.56339	0.50934
SLC35B1_HEK293T_gRNA913	SLC35B1	0.54339	0.18518
SLC35B1_HEK293T_gRNA962	SLC35B1	-1.1855	-0.6341
SLC35B1_HEK293T_gRNA1141	SLC35B1	0.18588	-0.20641
LSM8_HEK293T_gRNA222	LSM8	-0.19495	-0.15604
LSM8_HEK293T_gRNA248	LSM8	0.67162	0.68346
LSM8_HEK293T_gRNA311	LSM8	0.23473	0.26165
LSM8_HEK293T_gRNA389	LSM8	-1.1398	-0.70545
LSM8_HEK293T_gRNA391	LSM8	-0.39781	-0.27667
LSM8_HEK293T_gRNA428	LSM8	-2.0488	-1.92
UBA52_HEK293T_gRNA324	UBA52	-3.1202	-1.779
UBA52_HEK293T_gRNA325	UBA52	-2.3222	-1.0837
UBA52_HEK293T_gRNA354	UBA52	-5.0156	-3.2525
UBA52_HEK293T_gRNA359	UBA52	-3.9576	-1.9432
UBA52_HEK293T_gRNA385	UBA52	-2.5584	-0.79547
UBA52_HEK293T_gRNA402	UBA52	-4.4877	-3.0446
PSMD2_HEK293T_gRNA924	PSMD2	-0.88826	-2.2736
PSMD2_HEK293T_gRNA949	PSMD2	0.27874	0.070028
PSMD2_HEK293T_gRNA1638	PSMD2	0.5825	0.25924
PSMD2_HEK293T_gRNA1979	PSMD2	0.36046	-0.49726
PSMD2_HEK293T_gRNA2026	PSMD2	-2.9658	-2.7036
PSMD2_HEK293T_gRNA2056	PSMD2	-2.0607	-2.5376
MAT2A_HEK293T_gRNA689	MAT2A	-3.1406	-1.9891
MAT2A_HEK293T_gRNA718	MAT2A	-1.0829	0.0046694
MAT2A_HEK293T_gRNA812	MAT2A	-3.5319	-1.1281
MAT2A_HEK293T_gRNA1044	MAT2A	-1.1249	0.056782
MAT2A_HEK293T_gRNA1058	MAT2A	-3.6383	0.21506
MAT2A_HEK293T_gRNA1073	MAT2A	-3.9949	-0.72247
EIF1AX_HEK293T_gRNA291	EIF1AX	0.43829	0.25145
EIF1AX_HEK293T_gRNA336	EIF1AX	-2.1037	-1.1778
EIF1AX_HEK293T_gRNA449	EIF1AX	0.15515	0.36809
EIF1AX_HEK293T_gRNA489	EIF1AX	0.34799	0.58779
EIF1AX_HEK293T_gRNA493	EIF1AX	-0.57419	-0.86021
EIF1AX_HEK293T_gRNA498	EIF1AX	0.27554	0.28497
MTREX_HEK293T_gRNA689	MTREX	0.13767	-0.024686
MTREX_HEK293T_gRNA757	MTREX	-1.3657	-0.8462
MTREX_HEK293T_gRNA1156	MTREX	-4.3863	-2.4664
MTREX_HEK293T_gRNA1724	MTREX	-3.2662	-2.0946
MTREX_HEK293T_gRNA1921	MTREX	-3.8367	-1.4969
MTREX_HEK293T_gRNA2354	MTREX	-0.60228	-0.52487
RPLP1_HEK293T_gRNA264	RPLP1	-2.9964	-0.9302
RPLP1_HEK293T_gRNA265	RPLP1	-4.5725	-2.2178
RPLP1_HEK293T_gRNA340	RPLP1	-1.902	-0.66126
RPLP1_HEK293T_gRNA381	RPLP1	0.25268	0.30413
RPLP1_HEK293T_gRNA382	RPLP1	0.52615	0.19401
RPLP1_HEK293T_gRNA383	RPLP1	-0.33604	0.12594
BOP1_HEK293T_gRNA125	BOP1	0.14771	-0.27735
BOP1_HEK293T_gRNA775	BOP1	-2.7198	-1.0619
BOP1_HEK293T_gRNA1616	BOP1	0.11889	0.01936
BOP1_HEK293T_gRNA1976	BOP1	-0.30718	-0.58385
BOP1_HEK293T_gRNA1991	BOP1	0.50513	0.2424
BOP1_HEK293T_gRNA2074	BOP1	-2.6089	-1.9684
LARS1_HEK293T_gRNA283	LARS1	-0.074762	-0.43191
LARS1_HEK293T_gRNA285	LARS1	0.019399	0.13541
LARS1_HEK293T_gRNA975	LARS1	0.48153	0.17217
LARS1_HEK293T_gRNA1224	LARS1	0.52608	0.2102
LARS1_HEK293T_gRNA1285	LARS1	-1.5784	-0.96002
LARS1_HEK293T_gRNA1585	LARS1	-5.1775	-1.3342
RPP21_HEK293T_gRNA108	RPP21	-0.044067	0.23759
RPP21_HEK293T_gRNA126	RPP21	0.43643	0.2403
RPP21_HEK293T_gRNA136	RPP21	0.36275	0.13689
RPP21_HEK293T_gRNA246	RPP21	0.19389	0.40585
RPP21_HEK293T_gRNA379	RPP21	0.23065	0.18346
RPP21_HEK293T_gRNA450	RPP21	0.68823	0.40062
CCT8_HEK293T_gRNA427	CCT8	0.22549	0.13911
CCT8_HEK293T_gRNA502	CCT8	-3.7184	-3.4504
CCT8_HEK293T_gRNA843	CCT8	-4.581	-3.6969
CCT8_HEK293T_gRNA1032	CCT8	-0.66826	-0.83584
CCT8_HEK293T_gRNA1095	CCT8	-4.2228	-2.3102
CCT8_HEK293T_gRNA1745	CCT8	0.38167	0.3573
KARS1_HEK293T_gRNA341	KARS1	0.014331	-0.32183
KARS1_HEK293T_gRNA624	KARS1	0.24917	0.042095
KARS1_HEK293T_gRNA901	KARS1	-1.7028	-0.32835
KARS1_HEK293T_gRNA903	KARS1	-4.4795	-1.2719
KARS1_HEK293T_gRNA1259	KARS1	-0.67932	-0.29373
KARS1_HEK293T_gRNA1404	KARS1	-3.7168	-2.0785
PSMB3_HEK293T_gRNA155	PSMB3	0.13681	0.22781
PSMB3_HEK293T_gRNA231	PSMB3	0.42907	0.34625
PSMB3_HEK293T_gRNA277	PSMB3	0.50117	-0.049616
PSMB3_HEK293T_gRNA402	PSMB3	0.14746	-1.5099
PSMB3_HEK293T_gRNA532	PSMB3	0.38314	-0.3836
PSMB3_HEK293T_gRNA683	PSMB3	0.19535	0.49432
CCT7_HEK293T_gRNA241	CCT7	-1.2079	-0.80722
CCT7_HEK293T_gRNA612	CCT7	-3.0481	-1.257
CCT7_HEK293T_gRNA866	CCT7	-4.4716	-2.742
CCT7_HEK293T_gRNA945	CCT7	-0.63679	0.10059
CCT7_HEK293T_gRNA1246	CCT7	0.32799	0.014432
CCT7_HEK293T_gRNA1431	CCT7	-0.073126	-0.14616
VCP_HEK293T_gRNA1399	VCP	-3.567	-2.7867
VCP_HEK293T_gRNA1647	VCP	0.044915	-0.21516
VCP_HEK293T_gRNA2215	VCP	0.47955	0.71473
VCP_HEK293T_gRNA2241	VCP	-0.72195	-0.27084
VCP_HEK293T_gRNA2845	VCP	-0.081846	-0.39959
VCP_HEK293T_gRNA3137	VCP	-1.5781	-0.1123
VARS1_HEK293T_gRNA945	VARS1	-2.1478	-1.6356
VARS1_HEK293T_gRNA1001	VARS1	0.47811	0.85894
VARS1_HEK293T_gRNA1439	VARS1	0.30814	-0.84973
VARS1_HEK293T_gRNA2024	VARS1	0.077616	0.19838
VARS1_HEK293T_gRNA2129	VARS1	0.51503	0.079152
VARS1_HEK293T_gRNA2595	VARS1	-2.1229	-1.3754
AQR_HEK293T_gRNA1240	AQR	-2.5322	-5.7297
AQR_HEK293T_gRNA1241	AQR	-3.1038	-4.7381
AQR_HEK293T_gRNA2004	AQR	-4.2057	-3.8849
AQR_HEK293T_gRNA2246	AQR	0.44879	-0.81313
AQR_HEK293T_gRNA2626	AQR	-5.1305	-4.7299
AQR_HEK293T_gRNA3702	AQR	-2.6256	-5.591
SNRPD2_HEK293T_gRNA534	SNRPD2	-3.0475	-2.3995
SNRPD2_HEK293T_gRNA543	SNRPD2	0.032103	-0.25829
SNRPD2_HEK293T_gRNA621	SNRPD2	-0.64081	-0.65671
SNRPD2_HEK293T_gRNA624	SNRPD2	0.72135	0.071073
SNRPD2_HEK293T_gRNA669	SNRPD2	-3.6635	-2.0063
SNRPD2_HEK293T_gRNA758	SNRPD2	0.46685	0.52754
DCTN2_HEK293T_gRNA420	DCTN2	-0.0081953	-0.073486
DCTN2_HEK293T_gRNA579	DCTN2	0.34807	0.23536
DCTN2_HEK293T_gRNA628	DCTN2	-0.10268	0.1269
DCTN2_HEK293T_gRNA632	DCTN2	0.002982	0.37398
DCTN2_HEK293T_gRNA1068	DCTN2	0.45511	0.07124
DCTN2_HEK293T_gRNA1190	DCTN2	0.44351	0.53205
RPLP0_HEK293T_gRNA407	RPLP0	-0.0044949	-0.53449
RPLP0_HEK293T_gRNA408	RPLP0	-4.2366	-1.7538
RPLP0_HEK293T_gRNA411	RPLP0	-3.055	-1.8835
RPLP0_HEK293T_gRNA823	RPLP0	-3.1127	-1.3393
RPLP0_HEK293T_gRNA875	RPLP0	-3.7426	-2.9343
RPLP0_HEK293T_gRNA916	RPLP0	-4.1009	-2.628
RPL7_HEK293T_gRNA570	RPL7	-4.6451	-3.9753
RPL7_HEK293T_gRNA678	RPL7	-3.425	-3.669
RPL7_HEK293T_gRNA679	RPL7	-4.4104	-2.5579
RPL7_HEK293T_gRNA680	RPL7	-4.128	-2.3776
RPL7_HEK293T_gRNA831	RPL7	-3.1814	-3.4258
RPL7_HEK293T_gRNA840	RPL7	-3.2484	-2.4988
VIRMA_HEK293T_gRNA1114	VIRMA	-0.049963	-0.013472
VIRMA_HEK293T_gRNA1700	VIRMA	0.80537	0.20963
VIRMA_HEK293T_gRNA2158	VIRMA	0.37345	-0.041715
VIRMA_HEK293T_gRNA2212	VIRMA	0.33086	0.3018
VIRMA_HEK293T_gRNA4784	VIRMA	0.40967	0.18727
VIRMA_HEK293T_gRNA5006	VIRMA	0.38737	0.53317
ELOC_HEK293T_gRNA245	ELOC	-0.77993	0.088531
ELOC_HEK293T_gRNA256	ELOC	0.47291	0.4236
ELOC_HEK293T_gRNA378	ELOC	-0.70414	-0.0211
ELOC_HEK293T_gRNA410	ELOC	-0.62402	-0.083712
ELOC_HEK293T_gRNA471	ELOC	0.46064	0.22469
ELOC_HEK293T_gRNA474	ELOC	0.47011	0.25928
SFPQ_HEK293T_gRNA1204	SFPQ	-3.0994	-2.109
SFPQ_HEK293T_gRNA1206	SFPQ	-0.95874	-1.0308
SFPQ_HEK293T_gRNA1207	SFPQ	-3.4976	-2.5368
SFPQ_HEK293T_gRNA1386	SFPQ	-3.6684	-2.5496
SFPQ_HEK293T_gRNA1387	SFPQ	-3.3526	-0.9413
SFPQ_HEK293T_gRNA1865	SFPQ	-1.5833	-0.88926
MDN1_HEK293T_gRNA712	MDN1	-0.081921	-0.20153
MDN1_HEK293T_gRNA1981	MDN1	-4.6501	-2.3143
MDN1_HEK293T_gRNA4107	MDN1	-3.1406	-1.4293
MDN1_HEK293T_gRNA5656	MDN1	-4.0814	-2.1065
MDN1_HEK293T_gRNA5826	MDN1	-1.7688	-1.7366
MDN1_HEK293T_gRNA7162	MDN1	-2.4777	-1.7501
EIF4A1_HEK293T_gRNA624	EIF4A1	0.54508	0.48263
EIF4A1_HEK293T_gRNA626	EIF4A1	0.48727	0.39158
EIF4A1_HEK293T_gRNA892	EIF4A1	-3.0956	-3.3595
EIF4A1_HEK293T_gRNA893	EIF4A1	-3.011	-1.6354
EIF4A1_HEK293T_gRNA946	EIF4A1	-3.249	-2.9113
EIF4A1_HEK293T_gRNA947	EIF4A1	-3.3903	-3.8933
ELOB_HEK293T_gRNA177	ELOB	0.021306	0.3211
ELOB_HEK293T_gRNA178	ELOB	-0.48886	0.24382
ELOB_HEK293T_gRNA195	ELOB	-0.85337	0.4327
ELOB_HEK293T_gRNA214	ELOB	-0.043655	0.17848
ELOB_HEK293T_gRNA386	ELOB	-1.4962	0.05211
ELOB_HEK293T_gRNA388	ELOB	-0.5275	-0.21638
SBNO1_HEK293T_gRNA510	SBNO1	-0.60423	-0.19435
SBNO1_HEK293T_gRNA2184	SBNO1	0.60551	0.55668
SBNO1_HEK293T_gRNA2201	SBNO1	-0.5292	-0.028783
SBNO1_HEK293T_gRNA2325	SBNO1	0.24229	0.14672
SBNO1_HEK293T_gRNA3091	SBNO1	0.0024925	0.061563
SBNO1_HEK293T_gRNA3621	SBNO1	0.61418	0.26524
TUBB_HEK293T_gRNA317	TUBB	-3.2205	-2.2724
TUBB_HEK293T_gRNA318	TUBB	-4.1875	-2.778
TUBB_HEK293T_gRNA626	TUBB	-3.3196	-3.4757
TUBB_HEK293T_gRNA893	TUBB	-0.99209	0.016774
TUBB_HEK293T_gRNA1301	TUBB	-4.703	-2.4518
TUBB_HEK293T_gRNA1494	TUBB	-2.8255	-1.0959
AARS1_HEK293T_gRNA1207	AARS1	-0.44299	0.17935
AARS1_HEK293T_gRNA1280	AARS1	-2.2527	-1.211
AARS1_HEK293T_gRNA1883	AARS1	0.060273	0.14041
AARS1_HEK293T_gRNA2222	AARS1	0.45693	0.22874
AARS1_HEK293T_gRNA2513	AARS1	0.13031	-0.41065
AARS1_HEK293T_gRNA2649	AARS1	0.26207	0.26283
PSMD1_HEK293T_gRNA1150	PSMD1	-3.5459	-4.1096
PSMD1_HEK293T_gRNA1264	PSMD1	-4.1712	-3.3367
PSMD1_HEK293T_gRNA1484	PSMD1	-2.7495	-6.4712
PSMD1_HEK293T_gRNA1832	PSMD1	-2.4944	-4.4862
PSMD1_HEK293T_gRNA2105	PSMD1	-0.42628	-2.2727
PSMD1_HEK293T_gRNA2815	PSMD1	-1.9133	-3.5927
SF3B6_HEK293T_gRNA303	SF3B6	0.4244	0.46625
SF3B6_HEK293T_gRNA380	SF3B6	0.11948	-0.21925
SF3B6_HEK293T_gRNA383	SF3B6	0.25463	0.027546
SF3B6_HEK293T_gRNA384	SF3B6	0.070189	0.46314
SF3B6_HEK293T_gRNA385	SF3B6	0.49628	0.51712
SF3B6_HEK293T_gRNA441	SF3B6	-0.6612	-0.29626
G6PC3_HEK293T_gRNA762	G6PC3	0.3557	0.52404
G6PC3_HEK293T_gRNA764	G6PC3	0.73981	0.40608
G6PC3_HEK293T_gRNA767	G6PC3	-0.0045935	0.1645
G6PC3_HEK293T_gRNA798	G6PC3	0.1617	0.36113
G6PC3_HEK293T_gRNA1180	G6PC3	0.54067	0.39889
G6PC3_HEK293T_gRNA1198	G6PC3	0.68973	0.14231
TRAM1_HEK293T_gRNA321	TRAM1	0.28449	0.40943
TRAM1_HEK293T_gRNA394	TRAM1	0.021089	0.49126
TRAM1_HEK293T_gRNA515	TRAM1	0.29638	0.35059
TRAM1_HEK293T_gRNA546	TRAM1	0.25749	0.48524
TRAM1_HEK293T_gRNA550	TRAM1	0.32063	0.35274
TRAM1_HEK293T_gRNA745	TRAM1	0.6603	-0.020528
COX7A2L_HEK293T_gRNA73	COX7A2L	0.53169	0.49543
COX7A2L_HEK293T_gRNA149	COX7A2L	0.48669	0.63559
COX7A2L_HEK293T_gRNA187	COX7A2L	-0.31578	0.48252
COX7A2L_HEK293T_gRNA188	COX7A2L	-0.40879	0.14466
COX7A2L_HEK293T_gRNA189	COX7A2L	0.22425	0.3666
COX7A2L_HEK293T_gRNA329	COX7A2L	0.45643	0.76391
ARPC5L_HEK293T_gRNA1322	ARPC5L	0.35513	0.053383
ARPC5L_HEK293T_gRNA1602	ARPC5L	0.53317	0.32511
ARPC5L_HEK293T_gRNA1617	ARPC5L	0.297	0.53952
ARPC5L_HEK293T_gRNA1619	ARPC5L	0.74535	0.56219
ARPC5L_HEK293T_gRNA1622	ARPC5L	0.47462	0.31162
ARPC5L_HEK293T_gRNA1637	ARPC5L	0.31767	0.25135
HADHB_HEK293T_gRNA344	HADHB	0.15073	0.32782
HADHB_HEK293T_gRNA345	HADHB	0.12079	0.081923
HADHB_HEK293T_gRNA349	HADHB	0.22195	0.63177
HADHB_HEK293T_gRNA350	HADHB	0.16141	0.32256
HADHB_HEK293T_gRNA1010	HADHB	0.30096	0.49028
HADHB_HEK293T_gRNA1011	HADHB	0.16394	0.27373
TMEM50A_HEK293T_gRNA578	TMEM50A	0.42274	0.044548
TMEM50A_HEK293T_gRNA630	TMEM50A	0.35569	0.31785
TMEM50A_HEK293T_gRNA675	TMEM50A	0.54132	0.40944
TMEM50A_HEK293T_gRNA676	TMEM50A	0.47093	0.73756
TMEM50A_HEK293T_gRNA723	TMEM50A	0.43306	0.48458
TMEM50A_HEK293T_gRNA825	TMEM50A	0.28101	0.32534
SYPL1_HEK293T_gRNA292	SYPL1	0.59357	0.49338
SYPL1_HEK293T_gRNA323	SYPL1	0.17505	0.26209
SYPL1_HEK293T_gRNA442	SYPL1	0.12333	0.21916
SYPL1_HEK293T_gRNA658	SYPL1	0.45821	0.42793
SYPL1_HEK293T_gRNA659	SYPL1	0.41294	0.27592
SYPL1_HEK293T_gRNA680	SYPL1	0.45928	0.43476
STK25_HEK293T_gRNA432	STK25	0.63842	0.36699
STK25_HEK293T_gRNA610	STK25	0.36294	0.3887
STK25_HEK293T_gRNA634	STK25	0.55392	0.29206
STK25_HEK293T_gRNA996	STK25	0.36183	0.71738
STK25_HEK293T_gRNA1152	STK25	0.6186	0.50434
STK25_HEK293T_gRNA1163	STK25	-0.0020937	0.41649
EMP3_HEK293T_gRNA305	EMP3	0.2017	0.456
EMP3_HEK293T_gRNA307	EMP3	0.49457	0.38465
EMP3_HEK293T_gRNA335	EMP3	0.29443	0.063334
EMP3_HEK293T_gRNA509	EMP3	0.30161	0.076254
EMP3_HEK293T_gRNA571	EMP3	-0.083104	-0.1094
EMP3_HEK293T_gRNA573	EMP3	0.52994	0.17336
HMG20B_HEK293T_gRNA370	HMG20B	0.56721	0.41911
HMG20B_HEK293T_gRNA583	HMG20B	0.45584	0.33505
HMG20B_HEK293T_gRNA584	HMG20B	0.55738	0.052395
HMG20B_HEK293T_gRNA690	HMG20B	0.41453	0.43546
HMG20B_HEK293T_gRNA691	HMG20B	-0.14984	0.1746
HMG20B_HEK293T_gRNA749	HMG20B	0.47226	0.19519
LTA4H_HEK293T_gRNA962	LTA4H	0.38872	0.35795
LTA4H_HEK293T_gRNA1284	LTA4H	0.46955	0.5731
LTA4H_HEK293T_gRNA1609	LTA4H	0.52817	0.34083
LTA4H_HEK293T_gRNA1710	LTA4H	0.05874	0.43518
LTA4H_HEK293T_gRNA1812	LTA4H	0.47393	0.044791
LTA4H_HEK293T_gRNA1911	LTA4H	0.49999	0.50876
SDF4_HEK293T_gRNA357	SDF4	0.28099	0.38831
SDF4_HEK293T_gRNA589	SDF4	0.38791	0.16477
SDF4_HEK293T_gRNA772	SDF4	0.48196	-0.45804
SDF4_HEK293T_gRNA1147	SDF4	0.58199	0.22346
SDF4_HEK293T_gRNA1201	SDF4	0.15496	0.2329
SDF4_HEK293T_gRNA1206	SDF4	0.21277	0.19601
PSAP_HEK293T_gRNA750	PSAP	-0.74179	0.31385
PSAP_HEK293T_gRNA778	PSAP	-3.0818	0.055215
PSAP_HEK293T_gRNA1101	PSAP	0.58576	0.43575
PSAP_HEK293T_gRNA1186	PSAP	0.32226	0.54503
PSAP_HEK293T_gRNA1368	PSAP	0.29755	0.36671
PSAP_HEK293T_gRNA1384	PSAP	0.28958	0.27188
TRAP1_HEK293T_gRNA415	TRAP1	-0.032814	0.57445
TRAP1_HEK293T_gRNA1136	TRAP1	0.30737	0.75276
TRAP1_HEK293T_gRNA1348	TRAP1	0.51313	0.35494
TRAP1_HEK293T_gRNA1385	TRAP1	0.068796	0.28533
TRAP1_HEK293T_gRNA1582	TRAP1	0.50656	0.34402
TRAP1_HEK293T_gRNA2109	TRAP1	0.19374	0.51022
CCDC167_HEK293T_gRNA70	CCDC167	0.35303	-0.025143
CCDC167_HEK293T_gRNA83	CCDC167	-0.085536	0.58282
CCDC167_HEK293T_gRNA247	CCDC167	0.48125	0.53942
CCDC167_HEK293T_gRNA275	CCDC167	0.39449	0.12951
CCDC167_HEK293T_gRNA324	CCDC167	0.24367	0.4314
CCDC167_HEK293T_gRNA334	CCDC167	0.18676	0.41401
WBP2_HEK293T_gRNA266	WBP2	0.44004	0.50325
WBP2_HEK293T_gRNA356	WBP2	0.27662	0.57589
WBP2_HEK293T_gRNA359	WBP2	0.1825	0.46052
WBP2_HEK293T_gRNA362	WBP2	0.58593	0.47093
WBP2_HEK293T_gRNA542	WBP2	0.5001	0.56007
WBP2_HEK293T_gRNA584	WBP2	0.45767	0.56134
SLC29A1_HEK293T_gRNA386	SLC29A1	0.48247	0.48405
SLC29A1_HEK293T_gRNA587	SLC29A1	0.46187	0.38354
SLC29A1_HEK293T_gRNA723	SLC29A1	0.17208	0.42519
SLC29A1_HEK293T_gRNA964	SLC29A1	0.42316	0.56328
SLC29A1_HEK293T_gRNA996	SLC29A1	0.44754	0.3155
SLC29A1_HEK293T_gRNA1446	SLC29A1	0.40657	0.28637
HDDC2_HEK293T_gRNA195	HDDC2	0.59427	0.61052
HDDC2_HEK293T_gRNA259	HDDC2	0.2431	0.70423
HDDC2_HEK293T_gRNA278	HDDC2	0.20583	0.39321
HDDC2_HEK293T_gRNA279	HDDC2	0.3448	0.5279
HDDC2_HEK293T_gRNA506	HDDC2	0.30984	0.32997
HDDC2_HEK293T_gRNA507	HDDC2	0.36032	0.42279
HMGB2_HEK293T_gRNA933	HMGB2	0.58789	0.1256
HMGB2_HEK293T_gRNA1025	HMGB2	0.36295	0.28477
HMGB2_HEK293T_gRNA1076	HMGB2	0.5694	0.50773
HMGB2_HEK293T_gRNA1077	HMGB2	0.10494	0.15355
HMGB2_HEK293T_gRNA1107	HMGB2	0.36401	0.48092
HMGB2_HEK293T_gRNA1151	HMGB2	0.70729	0.50008
RNF167_HEK293T_gRNA892	RNF167	0.45986	0.43514
RNF167_HEK293T_gRNA945	RNF167	0.48855	0.6098
RNF167_HEK293T_gRNA1285	RNF167	0.44518	0.45104
RNF167_HEK293T_gRNA1286	RNF167	0.26047	0.54335
RNF167_HEK293T_gRNA1310	RNF167	0.34989	0.24462
RNF167_HEK293T_gRNA1323	RNF167	0.057191	0.14892
ITM2C_HEK293T_gRNA413	ITM2C	0.43587	0.43857
ITM2C_HEK293T_gRNA417	ITM2C	0.38008	0.42939
ITM2C_HEK293T_gRNA515	ITM2C	0.32049	0.27373
ITM2C_HEK293T_gRNA583	ITM2C	0.5203	0.41504
ITM2C_HEK293T_gRNA745	ITM2C	0.47394	0.49085
ITM2C_HEK293T_gRNA746	ITM2C	0.3243	0.14468
GSTK1_HEK293T_gRNA282	GSTK1	0.28701	0.072679
GSTK1_HEK293T_gRNA489	GSTK1	0.50259	0.37223
GSTK1_HEK293T_gRNA504	GSTK1	0.48213	0.61026
GSTK1_HEK293T_gRNA591	GSTK1	0.096996	0.2798
GSTK1_HEK293T_gRNA592	GSTK1	0.082686	0.43145
GSTK1_HEK293T_gRNA728	GSTK1	0.41086	0.24605
PDLIM1_HEK293T_gRNA321	PDLIM1	0.26099	0.57656
PDLIM1_HEK293T_gRNA323	PDLIM1	0.64996	0.61746
PDLIM1_HEK293T_gRNA475	PDLIM1	0.3394	0.40799
PDLIM1_HEK293T_gRNA863	PDLIM1	0.55126	0.48308
PDLIM1_HEK293T_gRNA996	PDLIM1	0.63638	0.71246
PDLIM1_HEK293T_gRNA1023	PDLIM1	0.42288	0.10411
CNPY3_HEK293T_gRNA771	CNPY3	0.39946	0.32631
CNPY3_HEK293T_gRNA819	CNPY3	0.41447	0.3287
CNPY3_HEK293T_gRNA825	CNPY3	0.37399	0.38104
CNPY3_HEK293T_gRNA844	CNPY3	0.36517	0.50292
CNPY3_HEK293T_gRNA865	CNPY3	0.53822	0.088957
CNPY3_HEK293T_gRNA1056	CNPY3	0.55419	0.27036
ANXA2_HEK293T_gRNA297	ANXA2	0.35111	0.49057
ANXA2_HEK293T_gRNA298	ANXA2	0.40408	0.59082
ANXA2_HEK293T_gRNA301	ANXA2	-0.27404	-0.12436
ANXA2_HEK293T_gRNA304	ANXA2	-0.97602	-1.2689
ANXA2_HEK293T_gRNA309	ANXA2	-1.6742	-2.049
ANXA2_HEK293T_gRNA310	ANXA2	-2.4083	-2.0696
LDHB_HEK293T_gRNA286	LDHB	-0.81943	-0.0085026
LDHB_HEK293T_gRNA376	LDHB	0.11648	0.40706
LDHB_HEK293T_gRNA380	LDHB	-1.1053	-0.045798
LDHB_HEK293T_gRNA396	LDHB	0.37663	0.50048
LDHB_HEK293T_gRNA707	LDHB	-0.29829	0.49197
LDHB_HEK293T_gRNA934	LDHB	-2.2504	0.27579
MLEC_HEK293T_gRNA694	MLEC	0.6046	0.50735
MLEC_HEK293T_gRNA732	MLEC	-2.6409	-0.07828
MLEC_HEK293T_gRNA745	MLEC	0.61346	0.45314
MLEC_HEK293T_gRNA873	MLEC	0.18924	0.31984
MLEC_HEK293T_gRNA901	MLEC	-0.00099695	-0.0341
MLEC_HEK293T_gRNA1225	MLEC	0.0091727	0.27945
CKB_HEK293T_gRNA567	CKB	0.44429	0.43451
CKB_HEK293T_gRNA1311	CKB	0.39778	0.58979
CKB_HEK293T_gRNA1316	CKB	0.40893	0.36879
CKB_HEK293T_gRNA1331	CKB	0.61904	0.10858
CKB_HEK293T_gRNA1415	CKB	-0.65248	0.3263
CKB_HEK293T_gRNA1416	CKB	0.44168	0.18518
SFT2D1_HEK293T_gRNA312	SFT2D1	0.36657	0.27311
SFT2D1_HEK293T_gRNA329	SFT2D1	0.37898	0.42576
SFT2D1_HEK293T_gRNA357	SFT2D1	0.47295	0.47749
SFT2D1_HEK293T_gRNA359	SFT2D1	0.32133	0.39593
SFT2D1_HEK293T_gRNA443	SFT2D1	0.36353	0.34434
SFT2D1_HEK293T_gRNA474	SFT2D1	-0.012069	0.17309
OAZ2_HEK293T_gRNA274	OAZ2	0.40385	0.531
OAZ2_HEK293T_gRNA483	OAZ2	0.14408	0.27843
OAZ2_HEK293T_gRNA521	OAZ2	0.43477	0.34639
OAZ2_HEK293T_gRNA522	OAZ2	0.26493	0.56468
OAZ2_HEK293T_gRNA532	OAZ2	0.40154	0.66535
OAZ2_HEK293T_gRNA593	OAZ2	0.34919	0.45452
gRNA_NT1	na	0.42462	0.49573
gRNA_NT2	na	0.40433	0.57499
gRNA_NT3	na	0.25185	0.40968
gRNA_NT4	na	0.67474	0.49576
gRNA_NT5	na	0.41857	0.44217
gRNA_NT6	na	0.60091	0.60626
gRNA_NT7	na	-0.0091331	0.21987
gRNA_NT8	na	0.31716	0.21446
gRNA_NT9	na	0.53033	0.437
gRNA_NT10	na	0.48522	0.18236
gRNA_NT11	na	0.5275	0.45773
gRNA_NT12	na	0.17679	0.67909
gRNA_NT13	na	0.33455	0.44218
gRNA_NT14	na	0.30693	0.4758
gRNA_NT15	na	0.51657	-0.0069623
gRNA_NT16	na	0.56838	0.19049
gRNA_NT17	na	0.56503	0.051786
gRNA_NT18	na	0.71645	0.16212
gRNA_NT19	na	0.44192	0.16753
gRNA_NT20	na	0.38087	0.71846
gRNA_NT21	na	0.3904	0.26046
gRNA_NT22	na	0.23658	0.35617
gRNA_NT23	na	0.75507	0.65722
gRNA_NT24	na	0.076523	-0.3602
gRNA_NT25	na	0.40274	0.52001
gRNA_NT26	na	0.39653	0.27654
gRNA_NT27	na	0.33896	0.44983
gRNA_NT28	na	0.43438	0.27719
gRNA_NT29	na	0.33232	0.17053
gRNA_NT30	na	0.64625	0.50402
gRNA_NT31	na	0.49774	0.48033
gRNA_NT32	na	0.8173	0.86063
gRNA_NT33	na	0.49188	0.26345
gRNA_NT34	na	0.54532	0.43366
gRNA_NT35	na	0.43497	0.035636
gRNA_NT36	na	0.65922	0.41531
gRNA_NT37	na	0.35465	0.47454
gRNA_NT38	na	0.21022	0.48072
gRNA_NT39	na	0.29801	0.45482
gRNA_NT40	na	0.88942	0.7933
gRNA_NT41	na	0.43505	0.35454
gRNA_NT42	na	0.095795	0.45936
gRNA_NT43	na	0.36512	0.58553
gRNA_NT44	na	0.3431	0.42525
gRNA_NT45	na	0.35565	0.4504
gRNA_NT46	na	0.64525	0.64866
gRNA_NT47	na	0.71194	0.26829
gRNA_NT48	na	0.67615	0.42579
gRNA_NT49	na	0.57298	0.597
gRNA_NT50	na	0.78006	0.6529
gRNA_NT51	na	0.29983	0.45451
gRNA_NT52	na	0.40682	0.34952
gRNA_NT53	na	0.54164	0.47482
gRNA_NT54	na	0.38886	0.049874
gRNA_NT55	na	0.029289	0.12038
gRNA_NT56	na	0.31025	0.50514
gRNA_NT57	na	0.2764	0.36178
gRNA_NT58	na	0.63191	0.19829
gRNA_NT59	na	0.70955	0.35356
gRNA_NT60	na	0.3297	0.5979
gRNA_NT61	na	0.40692	0.24232
gRNA_NT62	na	0.58132	0.55327
gRNA_NT63	na	0.33091	0.39436
gRNA_NT64	na	0.28837	0.61044
gRNA_NT65	na	0.41563	0.68402
gRNA_NT66	na	0.35826	0.56007
gRNA_NT67	na	0.25314	0.34097
gRNA_NT68	na	0.50135	0.67426
gRNA_NT69	na	0.39967	0.32939
gRNA_NT70	na	0.031081	0.59242
gRNA_NT71	na	0.70247	0.5455
gRNA_NT72	na	0.30094	0.20605
gRNA_NT73	na	0.55067	0.62524
gRNA_NT74	na	0.38312	0.47354
gRNA_NT75	na	0.59199	0.70377
gRNA_NT76	na	0.40368	0.47105
gRNA_NT77	na	0.55569	0.46919
gRNA_NT78	na	0.2865	0.45716
gRNA_NT79	na	0.38306	0.39413
gRNA_NT80	na	0.70716	0.73468
gRNA_NT81	na	0.51052	0.36168
gRNA_NT82	na	0.40859	0.26015
gRNA_NT83	na	0.45844	0.034309
gRNA_NT84	na	0.51497	0.51747
gRNA_NT85	na	0.49561	0.01805
gRNA_NT86	na	0.28689	0.52381
gRNA_NT87	na	0.4874	0.27321
gRNA_NT88	na	0.3778	0.33003
gRNA_NT89	na	0.51953	0.54857
gRNA_NT90	na	0.23397	0.4972
gRNA_NT91	na	0.56966	0.56778
gRNA_NT92	na	0.61171	0.66255
gRNA_NT93	na	0.56129	0.5828
gRNA_NT94	na	0.41477	0.46154
gRNA_NT95	na	0.71456	0.50895
gRNA_NT96	na	0.25359	0.39474
gRNA_NT97	na	0.53117	0.58168
gRNA_NT98	na	0.40016	0.44538
gRNA_NT99	na	0.55575	0.60183
gRNA_NT100	na	0.24461	0.2492

## Sheet: Hela screen gene depletion
id	num	neg|score	neg|p-value	neg|fdr	neg|rank	neg|lfc
EIF3B	6	8.0248e-07	4.9868e-06	0.000753	1	-3.3877
WDR75	6	2.5125e-06	1.4961e-05	0.00113	2	-3.6262
UBA52	6	1.7743e-05	5.4855e-05	0.002761	3	-3.5389
RPLP2	6	5.0884e-05	0.00023438	0.008409	4	-3.0679
RPL7	6	6.3046e-05	0.00029422	0.008409	5	-3.7765
RPL17	6	7.5313e-05	0.00033412	0.008409	6	-3.0327
SNRNP200	6	0.00013864	0.0006433	0.013877	7	-4.1992
CSE1L	6	0.00020336	0.00092256	0.017413	8	-3.5972
SFPQ	6	0.00024709	0.0012417	0.020256	9	-3.226
RPL10	6	0.00027172	0.0013415	0.020256	10	-2.5534
TUBB	6	0.00030537	0.001521	0.020879	11	-3.2701
MAT2A	6	0.00039175	0.0019598	0.024661	12	-3.3363
XPO1	6	0.00047619	0.0023588	0.027398	13	-3.0337
PSMD1	6	0.0010439	0.005291	0.057068	14	-2.6219
EFTUD2	6	0.0011986	0.0060091	0.059629	15	-3.5306
RPLP0	6	0.0012663	0.0063183	0.059629	16	-3.4276
NUP133	6	0.0016193	0.0078942	0.070119	17	-2.581
ARCN1	6	0.0017609	0.0086222	0.072331	18	-2.2398
SF3B1	6	0.0025528	0.012003	0.095395	19	-3.2287
MDN1	6	0.0027229	0.012791	0.096278	20	-2.8091
EIF3D	6	0.0028576	0.01339	0.096278	21	-1.075
RACK1	6	0.0031541	0.014537	0.096877	22	-2.5381
RPL30	6	0.0032198	0.014756	0.096877	23	-3.7346
RPS6	6	0.0035643	0.015873	0.099868	24	-2.9547
CCT8	6	0.0038547	0.01687	0.101898	25	-2.1933
AQR	6	0.0041744	0.018237	0.105914	26	-2.8647
TUBA1B	6	0.0070893	0.02825	0.157993	27	-1.8205
COPB1	6	0.0080709	0.031811	0.171552	28	-1.4212
CDC5L	6	0.010092	0.038404	0.197866	29	-1.8822
MTREX	6	0.010352	0.039311	0.197866	30	-2.316
EIF4A1	6	0.011434	0.04344	0.211596	31	-3.0533
HNRNPU	6	0.012269	0.046393	0.218915	32	-0.70168
DYNC1H1	6	0.013825	0.051808	0.237062	33	-1.8815
COPG1	6	0.014907	0.055528	0.246611	34	-0.23598
PRPF8	6	0.018884	0.067976	0.293266	35	-2.0332
SMU1	6	0.019937	0.071496	0.299887	36	-1.6324
LARS1	6	0.026698	0.089768	0.366351	37	-0.027681
CWC22	6	0.045291	0.13305	0.528714	38	-1.3845
CDC16	6	0.05884	0.162	0.60881	39	-0.92933
RPA1	6	0.061369	0.16723	0.60881	40	-0.080917
KARS1	6	0.061713	0.16787	0.60881	41	-1.1911
CCT7	6	0.062445	0.16934	0.60881	42	-0.92233
ELOB	6	0.07575	0.1965	0.690022	43	-0.50818
RAN	6	0.085239	0.21561	0.73992	44	-0.57214
RPLP1	6	0.091644	0.22863	0.767185	45	-1.119
LDHB	6	0.097363	0.24037	0.780011	46	-0.55886
DDX47	6	0.10051	0.24657	0.780011	47	-0.079058
ANXA2	6	0.10129	0.24795	0.780011	48	-0.62503
PSMA2	6	0.10944	0.26396	0.80863	49	-0.40254
LSM8	6	0.11154	0.26776	0.80863	50	-0.29638
CPSF1	6	0.11884	0.28159	0.833732	51	-1.0537
TSG101	6	0.12728	0.29424	0.854422	52	0.31017
GARS1	6	0.13265	0.30091	0.857311	53	-0.83701
VARS1	6	0.13759	0.30705	0.858615	54	0.19288
TCP1	6	0.15167	0.32484	0.883592	55	-0.65963
CKAP5	6	0.15406	0.32769	0.883592	56	0.13263
RPS28	6	0.15927	0.33468	0.886612	57	-0.13634
SF3A3	6	0.17985	0.3614	0.940889	58	-0.48198
SNRPD2	6	0.19996	0.38698	0.990415	59	-0.30435
PSMD2	6	0.21174	0.40091	1	60	-0.30476
VCP	6	0.22399	0.41535	1	61	-0.4019
ELOC	6	0.24011	0.43575	1	62	-0.08169
BOP1	6	0.24377	0.44028	1	63	-0.094145
RPS11	6	0.26033	0.45985	1	64	-0.26492
GTPBP4	6	0.26723	0.46778	1	65	0.039732
KPNB1	6	0.27159	0.47288	1	66	-0.16244
TRRAP	6	0.27917	0.48184	1	67	-0.20865
NARS1	6	0.28682	0.49079	1	68	-0.099909
NEDD8	6	0.29453	0.49961	1	69	-0.14011
SRRT	6	0.30793	0.51544	1	70	0.016844
PRELID3B	6	0.30815	0.51571	1	71	-0.21034
DARS1	6	0.316	0.52449	1	72	-0.033338
SNU13	6	0.31671	0.52518	1	73	0.36098
RRM1	6	0.31995	0.52901	1	74	-0.059193
EPRS1	6	0.34385	0.55664	1	75	-0.06787
DDX27	6	0.34586	0.55881	1	76	-0.10165
U2AF2	6	0.34672	0.55973	1	77	0.22726
CCT2	6	0.35392	0.5673	1	78	-0.10047
PSAP	6	0.35925	0.57305	1	79	0.29357
NUP93	6	0.37967	0.58669	1	80	0.10826
NIFK	6	0.44098	0.62697	1	81	0.063476
POLA1	6	0.44877	0.63242	1	82	0.012136
SARS1	6	0.46962	0.64626	1	83	0.17557
HYOU1	6	0.4908	0.66033	1	84	0.24237
PSMA6	6	0.49313	0.662	1	85	0.021415
BUD23	6	0.49458	0.66299	1	86	0.27904
EIF1AX	6	0.54346	0.69755	1	87	0.21535
SBNO1	6	0.58736	0.72905	1	88	0.12239
AARS1	6	0.60223	0.74084	1	89	0.095292
INTS11	6	0.6106	0.7467	1	90	0.28622
PRC1	6	0.62913	0.76077	1	91	-0.062612
MLEC	6	0.62946	0.76102	1	92	0.099207
COX7A2L	6	0.6352	0.76546	1	93	0.34034
COPA	6	0.65493	0.78036	1	94	0.059822
DDX23	6	0.65896	0.78342	1	95	0.15732
YAE1	6	0.66861	0.79145	1	96	0.13032
TIMM23	6	0.70587	0.81197	1	97	0.31005
LSM7	6	0.77219	0.83417	1	98	0.27432
SLC35B1	6	0.81988	0.85475	1	99	0.41047
PPP3R1	6	0.85776	0.87456	1	100	0.3538
CKB	6	0.86127	0.87654	1	101	0.42531
SF3B6	6	0.88682	0.89325	1	102	0.18705
IARS1	6	0.91155	0.91281	1	103	0.11729
HMG20B	6	0.92562	0.92602	1	104	0.46405
UTP4	6	0.9263	0.92674	1	105	0.13199
DCTN2	6	0.92833	0.92876	1	106	0.17553
EMP3	6	0.93224	0.9324	1	107	0.29802
CCDC167	6	0.93288	0.93308	1	108	0.29835
GMPPB	6	0.93597	0.93626	1	109	0.4683
YARS1	6	0.93718	0.93719	1	110	0.30642
CIAO3	6	0.93836	0.93809	1	111	0.35026
BUB1B	6	0.94068	0.94039	1	112	0.5312
VIRMA	6	0.94125	0.94092	1	113	0.38041
RPP21	6	0.94181	0.94159	1	114	0.2967
NOP16	6	0.9451	0.94502	1	115	0.31369
TRAP1	6	0.94616	0.94607	1	116	0.25055
SFT2D1	6	0.94823	0.94809	1	117	0.36505
G6PC3	6	0.95023	0.95021	1	118	0.44819
STK25	6	0.95264	0.95272	1	119	0.45843
WARS1	6	0.9554	0.95541	1	120	0.40201
TERF2	6	0.95717	0.95724	1	121	0.352
TRAM1	6	0.95803	0.95813	1	122	0.29043
CIAO2B	6	0.95971	0.9597	1	123	0.22511
RNF167	6	0.96367	0.96361	1	124	0.39753
MARS1	6	0.96479	0.96485	1	125	0.42916
LTA4H	6	0.96588	0.96594	1	126	0.47174
GSTK1	6	0.97093	0.97085	1	127	0.34893
MCM3AP	6	0.97125	0.9711	1	128	0.40261
HMGB2	6	0.97307	0.97308	1	129	0.4667
HADHB	6	0.97394	0.97389	1	130	0.16267
PSMB3	6	0.97534	0.97545	1	131	0.28924
SYPL1	6	0.97821	0.97835	1	132	0.43558
OAZ2	6	0.97988	0.98007	1	133	0.37536
SDF4	6	0.98012	0.98033	1	134	0.33445
YJU2	6	0.98209	0.98222	1	135	0.28795
UFD1	6	0.9823	0.98234	1	136	0.26364
CNOT3	6	0.9839	0.98407	1	137	0.44484
CFAP298	6	0.98465	0.98474	1	138	0.56474
SLC29A1	6	0.98538	0.98556	1	139	0.43535
WBP2	6	0.9859	0.98601	1	140	0.44885
SPOUT1	6	0.98674	0.98683	1	141	0.35244
HDDC2	6	0.98707	0.98717	1	142	0.32732
ARPC5L	6	0.99355	0.99332	1	143	0.41487
PDLIM1	6	0.99381	0.99356	1	144	0.48707
RUVBL2	6	0.99398	0.99378	1	145	0.41127
HAUS7	6	0.99581	0.99564	1	146	0.42918
TMEM50A	6	0.99672	0.9965	1	147	0.4279
PAM16	6	0.99697	0.99684	1	148	0.37497
ITM2C	6	0.99741	0.99726	1	149	0.40797
CNPY3	6	0.9987	0.99871	1	150	0.40697
na	100	1	1	1	151	0.4171

## Sheet: A375 screen gene depletion
id	num	neg|score	neg|p-value	neg|fdr	neg|rank	neg|lfc
SNRNP200	6	7.2004e-08	4.9868e-06	0.000377	1	-3.6154
PSMD1	6	6.6814e-07	4.9868e-06	0.000377	2	-3.8512
RPL17	6	5.1708e-06	2.4934e-05	0.000941	3	-2.915
RPL7	6	7.6923e-06	2.4934e-05	0.000941	4	-2.9919
COPB1	6	1.2915e-05	4.4882e-05	0.001355	5	-3.1935
WDR75	6	5.1066e-05	0.00024435	0.005486	6	-2.7221
RPLP2	6	5.414e-05	0.00025433	0.005486	7	-1.9622
AQR	6	8.984e-05	0.00039396	0.007436	8	-4.734
EFTUD2	6	9.7008e-05	0.00044383	0.007446	9	-3.5888
EIF3B	6	0.00011493	0.00053359	0.008057	10	-1.6719
RAN	6	0.00013149	0.00061338	0.00842	11	-2.2879
CSE1L	6	0.00015796	0.00073306	0.009224	12	-2.4985
SFPQ	6	0.00039175	0.0019598	0.021568	13	-1.5699
SF3B1	6	0.00040517	0.0019997	0.021568	14	-2.887
RRM1	6	0.00055357	0.0027577	0.026685	15	-2.449
UBA52	6	0.00056471	0.0028275	0.026685	16	-1.8611
PRPF8	6	0.0006933	0.003426	0.030431	17	-1.9723
RPLP0	6	0.0012114	0.0061089	0.051247	18	-1.8187
RPL10	6	0.0015861	0.0077545	0.05903	19	-1.7448
MDN1	6	0.0016584	0.0081335	0.05903	20	-1.7433
POLA1	6	0.0017915	0.0088417	0.05903	21	-1.3861
CDC5L	6	0.0018224	0.0089913	0.05903	22	-1.7908
COPG1	6	0.0018226	0.0089913	0.05903	23	-1.7135
COPA	6	0.0022318	0.011076	0.069685	24	-1.35
PSMA6	6	0.0024635	0.012123	0.071333	25	-0.94244
NUP133	6	0.002498	0.012283	0.071333	26	-1.9538
RPL30	6	0.0029017	0.014277	0.079847	27	-2.4446
RPS6	6	0.0032198	0.015743	0.080135	28	-1.7238
PSMA2	6	0.0032313	0.015793	0.080135	29	-0.92439
EIF3D	6	0.0033856	0.016322	0.080135	30	-0.75901
TUBB	6	0.0034232	0.016452	0.080135	31	-2.3621
CCT8	6	0.0039074	0.018676	0.088126	32	-1.573
XPO1	6	0.0060554	0.026296	0.120322	33	-1.5756
RACK1	6	0.011192	0.04374	0.194255	34	-1.08
CWC22	6	0.012019	0.046622	0.197071	35	-1.2195
EIF4A1	6	0.012392	0.047928	0.197071	36	-2.2734
MTREX	6	0.012836	0.049514	0.197071	37	-1.1716
PSMD2	6	0.012857	0.049594	0.197071	38	-1.3855
SMU1	6	0.013623	0.052068	0.201595	39	-1.3324
RPA1	6	0.015306	0.057723	0.217903	40	-1.3737
ARCN1	6	0.016436	0.061134	0.225151	41	-1.996
SNU13	6	0.020817	0.075027	0.266234	42	-0.39088
KARS1	6	0.021034	0.075815	0.266234	43	-0.32509
HNRNPU	6	0.023062	0.081639	0.280172	44	-0.4044
RPS11	6	0.03591	0.12017	0.39836	45	-0.56472
VCP	6	0.03633	0.12135	0.39836	46	-0.243
NUP93	6	0.045291	0.14385	0.462141	47	-1.0234
RPS28	6	0.086136	0.22364	0.703549	48	-0.79004
TUBA1B	6	0.095433	0.24165	0.744667	49	-0.46241
DYNC1H1	6	0.099495	0.24946	0.753358	50	-0.77596
BOP1	6	0.10532	0.26018	0.770331	51	-0.4306
GTPBP4	6	0.11154	0.27142	0.788157	52	-0.34142
SNRPD2	6	0.11473	0.27733	0.790137	53	-0.4575
ANXA2	6	0.12291	0.29164	0.815498	54	-0.69661
CPSF1	6	0.1355	0.31317	0.859789	55	-0.67751
LSM8	6	0.14832	0.33611	0.894336	56	-0.21635
CCT7	6	0.15082	0.34023	0.894336	57	-0.47669
DDX27	6	0.1559	0.34896	0.894336	58	-0.22522
GARS1	6	0.15622	0.34944	0.894336	59	-0.65656
LSM7	6	0.16707	0.36844	0.926094	60	-0.4966
TCP1	6	0.17034	0.37412	0.926094	61	-0.55481
DARS1	6	0.17576	0.38325	0.933407	62	-0.17061
VARS1	6	0.20485	0.41749	0.996977	63	-0.38529
BUB1B	6	0.21347	0.42667	0.996977	64	-0.39047
CKAP5	6	0.21969	0.43326	0.996977	65	0.055333
MAT2A	6	0.22455	0.43815	0.996977	66	-0.3589
TSG101	6	0.2294	0.44353	0.996977	67	0.42557
KPNB1	6	0.23649	0.45161	0.996977	68	-0.17021
NIFK	6	0.24011	0.45557	0.996977	69	-0.19309
SF3A3	6	0.25476	0.47107	1	70	-0.36888
RPLP1	6	0.26594	0.483	1	71	-0.26766
TRRAP	6	0.28682	0.50493	1	72	-0.23067
LARS1	6	0.31995	0.53905	1	73	-0.14825
U2AF2	6	0.35092	0.57019	1	74	0.1209
EPRS1	6	0.36202	0.58095	1	75	-0.10009
SARS1	6	0.37563	0.59482	1	76	0.11093
NARS1	6	0.4215	0.64087	1	77	-0.08152
EIF1AX	6	0.46012	0.67729	1	78	0.26821
HYOU1	6	0.54573	0.72531	1	79	0.18903
BUD23	6	0.60012	0.75721	1	80	0.13262
PRC1	6	0.64321	0.78355	1	81	0.0082529
AARS1	6	0.64719	0.78594	1	82	0.15988
PSMB3	6	0.65701	0.79207	1	83	0.089099
DDX23	6	0.6609	0.79462	1	84	0.0087878
IARS1	6	0.69297	0.81537	1	85	0.097118
SF3B6	6	0.70566	0.82369	1	86	0.24534
TIMM23	6	0.711	0.82729	1	87	0.1956
SLC35B1	6	0.71628	0.83103	1	88	0.10872
UTP4	6	0.71977	0.83313	1	89	0.021504
DDX47	6	0.72069	0.83369	1	90	0.066063
CDC16	6	0.72324	0.83547	1	91	0.080953
INTS11	6	0.73348	0.84242	1	92	0.29184
CCT2	6	0.73684	0.84466	1	93	0.062532
SRRT	6	0.80191	0.87638	1	94	0.3392
WARS1	6	0.83108	0.88529	1	95	0.51099
SDF4	6	0.90914	0.92086	1	96	0.20973
ELOB	6	0.92965	0.93397	1	97	0.21115
PRELID3B	6	0.93096	0.93488	1	98	0.209
SBNO1	6	0.9316	0.93531	1	99	0.10414
HAUS7	6	0.94011	0.9414	1	100	0.32608
SPOUT1	6	0.94068	0.94182	1	101	0.48695
EMP3	6	0.94347	0.94405	1	102	0.12481
CIAO3	6	0.94616	0.94643	1	103	0.30711
RUVBL2	6	0.94924	0.94934	1	104	0.27024
ELOC	6	0.9512	0.95125	1	105	0.15661
NOP16	6	0.95169	0.95171	1	106	0.21479
MLEC	6	0.95264	0.95272	1	107	0.29965
TERF2	6	0.95404	0.95412	1	108	0.37741
DCTN2	6	0.95495	0.95507	1	109	0.18113
YJU2	6	0.95674	0.95678	1	110	0.2153
LDHB	6	0.95717	0.95724	1	111	0.34143
VIRMA	6	0.9576	0.95766	1	112	0.19845
CCDC167	6	0.96053	0.96057	1	113	0.4227
TRAM1	6	0.96173	0.96177	1	114	0.38108
CFAP298	6	0.96405	0.96403	1	115	0.34565
PPP3R1	6	0.96442	0.96453	1	116	0.17806
MARS1	6	0.9666	0.96655	1	117	0.36207
MCM3AP	6	0.96932	0.96919	1	118	0.24088
LTA4H	6	0.97217	0.97201	1	119	0.39657
TMEM50A	6	0.97247	0.97244	1	120	0.36739
PSAP	6	0.97307	0.97308	1	121	0.34028
NEDD8	6	0.97365	0.97364	1	122	0.2547
ARPC5L	6	0.97507	0.97519	1	123	0.31836
HMG20B	6	0.97589	0.97599	1	124	0.26512
CNOT3	6	0.97821	0.97835	1	125	0.29103
GSTK1	6	0.97918	0.97916	1	126	0.32602
PDLIM1	6	0.97988	0.98007	1	127	0.52982
HADHB	6	0.98034	0.98057	1	128	0.32519
CNPY3	6	0.98101	0.98101	1	129	0.3275
YAE1	6	0.98123	0.98131	1	130	0.30924
CKB	6	0.98251	0.98257	1	131	0.34755
RPP21	6	0.98555	0.98579	1	132	0.23894
HMGB2	6	0.98573	0.98592	1	133	0.38284
ITM2C	6	0.9859	0.98601	1	134	0.42222
G6PC3	6	0.98674	0.98683	1	135	0.38001
RNF167	6	0.98707	0.98717	1	136	0.44309
COX7A2L	6	0.98887	0.98878	1	137	0.48897
CIAO2B	6	0.99142	0.99122	1	138	0.53928
UFD1	6	0.99239	0.99225	1	139	0.40851
SFT2D1	6	0.99308	0.99287	1	140	0.37013
PAM16	6	0.99355	0.99332	1	141	0.29988
SYPL1	6	0.99581	0.99564	1	142	0.35192
YARS1	6	0.99697	0.99684	1	143	0.43456
TRAP1	6	0.99715	0.99704	1	144	0.43258
GMPPB	6	0.99758	0.99737	1	145	0.37568
OAZ2	6	0.99852	0.99853	1	146	0.49276
SLC29A1	6	0.99855	0.99855	1	147	0.40437
STK25	6	0.99874	0.99872	1	148	0.4026
HDDC2	6	0.99898	0.99895	1	149	0.47535
WBP2	6	0.99997	1	1	150	0.53166
na	100	1	1	1	151	0.45466
