# Supplementary material for: Deciphering cellular context for efficient and cell type-specific CRISPR-Cas13d gRNA design using in vivo RNA structure and deep learning
Source: Research Square preprint supplement (doi:10.21203/rs.3.rs-7184055/v1), 2025-09-24
Supplement: Supplementary file 3 [file 53e4470b120dd912788cd157.xlsx]

## Sheet: Sheet1
Sample	293FT				A375				HAP1_1_30
Treatment	DMSO1	DMSO2	NAI1	NAI2	DMSO1	DMSO2	NAI1	NAI2	D1	D2	D3	NAI1	NAI2
Raw Reads	22166901	7608261	308393954	247927120	20123534	18283333	261778828	288914155	46386612	51130106	49971958	227153555	204298977
remove duplicates	21676690	7433033	301092014	241415341	19635750	17757710	256904509	284114528	45753406	50575847	49314367	225009381	202578884
after trimming	19970927	6274873	290253195	236428728	18258272	16398697	250541228	271874960	45015795	49175900	48133425	218452346	195898795
mapping to rRNA_tRNA_mtRNA	615388	192152	146791692	121207383	433902	431186	88797291	91791102	2831793	2837702	2998475	45983409	40943088
mapping to smallRNA	437922	152456	3981878	3481674	397252	411862	4187207	4294191	1002239	1056556	1017312	9661814	9659376
valid_mapping to human genome	10824123	3378528	95337727	76594607	9995061	9083851	112538303	126909428	33457869	36097279	35749791	106838784	95820236
genome ratio	0.541994	0.538422	0.328464	0.323965	0.547426	0.553937	0.449181	0.466793	0.743247	0.734044	0.742723	0.489071	0.489131
