# Supplementary material for: Deciphering cellular context for efficient and cell type-specific CRISPR-Cas13d gRNA design using in vivo RNA structure and deep learning
Source: Research Square preprint supplement (doi:10.21203/rs.3.rs-7184055/v1), 2025-09-24
Supplement: Supplementary file 4 [file 5eed422db9126280c9137960.xlsx]

## Sheet: Sheet1
Table S1 RfxCas13d screening data source
Dataset	Cell Line	gRNA number	Target	Source
Cas13d pooled screen data	A375, HEK293FT	2035	Essential genes	Wessels et al. (2020)
Cas13d pooled screen data	K562	53558	Essential genes	Chen et al. (2023)
Cas13d off-target screens data	HEK293FT	118117	Essential genes	Wessels et al. (2024)
Cas13d on-target screens data	HEK293FT, HAP1	77160	Essential genes	Wessels et al. (2024)
Cas13d titration screens data	HAP1	41830	Essential genes	Wessels et al. (2024)
