# Supplementary material for: Deciphering cellular context for efficient and cell type-specific CRISPR-Cas13d gRNA design using in vivo RNA structure and deep learning
Source: Research Square preprint supplement (doi:10.21203/rs.3.rs-7184055/v1), 2025-09-24
Supplement: Supplementary file 5 [file 9f90962751ad72a1520c1497.xlsx]

## Sheet: A375
model	gRNA_id	cell_line	gene	gRNA_seq	target_seq	transcript_id	extend_target	DR_sequence	gRNA_MFE	DR_gRNA_fold	hybridMFE	icshape_score	protein_binding_p	p1(start_1)	p2	extend_p1	extend_p2	MismatchPosition	MismatchIdentity	Nromalized_LFC	parental_gRNA	parental_gRNA_LFC	start_relative_length	end_pos_relative_length	start_target_to_transcript	end_target_to_transcript	cds_start	cds_end	5utr	cds	3utr	5utr_rate	cds_rate	3utr_rate	control_gene
all	DARS1_A375_gRNA727	A375	DARS1	GTATCCTGGTTAACAGTAGCTCT	AGAGCTACTGTTAACCAGGATAC	ENST00000264161	ACATGTTCAGAAGATTTATGTGATCAGTTTGGCTGAACCCCGTCTGCCCCTGCAGCTGGATGATGCTGTTCGGCCTGAGGCAGAAGGAGAAGAGGAAGGAAGAGCTACTGTTAACCAGGATACAAGATTAGACAACAGAGTCATTGATCTTAGGACATCAACTAGTCAGGCAGTCTTCCGTCTCCAGTCTGGCATCTGCCATCTCTTCCGAGAAACTTTAATT	aacccctaccaactggtcggggtttgaaac	-14.8	((((((.(((....))).))))))...........(((.....))).......	-36.64	na	0.796811,0.071424,0.052303,0.699862,0.817128,0.132299,0.765730,0.711435,0.856155,0.997867,0.829600,0.010951,0.900514,0.983239,0.914391,0.818975,0.878706,0.650979,0.729008,0.865683,0.739004,0.138052,0.331660,0.630092,0.995754,0.999148,0.478446,0.929134,0.957958,0.816564,0.954114,0.328706,0.353807,0.089475,0.980120,0.776480,0.301031,0.178490,0.011849,0.329150,0.029857,0.107751,0.148521,0.840201,0.8…	101	123	627	849	na	na	0	na	na	0.307497	0.682762	727	749	217	1719	0	1	0	-1	0.339321	-1	FALSE
all	DARS1_A375_gRNA1018	A375	DARS1	TCCGCTCTGAATACTGGTCCAAT	ATTGGACCAGTATTCAGAGCGGA	ENST00000264161	TTTTACTGTGTCATATTTTAAAAATAATGCATACCTGGCTCAGTCCCCACAGCTATATAAGCAAATGTGCATTTGTGCTGATTTTGAGAAGGTTTTCTCTATTGGACCAGTATTCAGAGCGGAAGACTCTAATACCCATAGACATCTAACTGAGTTTGTTGGTTTGGACATTGAAATGGCTTTTAATTACCATTACCACGAAGTTATGGAAGAAATTGCTGAC	aacccctaccaactggtcggggtttgaaac	-12.8	((((((.(((....))).)))))).............................	-40.86	na	0.913599,0.166695,0.021210,0.756743,0.918135,0.310905,0.568602,0.801180,0.757250,0.939307,0.936227,0.075932,0.264351,0.983088,0.213871,0.860772,0.977763,0.840350,0.471442,0.900818,0.930662,0.414839,0.831919,0.884106,0.720921,0.962038,0.509111,0.885199,0.930506,0.481296,0.993685,0.333298,0.189620,0.164153,0.874452,0.813426,0.633907,0.308201,0.018302,0.109199,0.228539,0.299973,0.697016,0.630598,0.8…	101	123	918	1140	na	na	0	na	na	0.43075	0.559509	1018	1040	217	1719	0	1	0	-1	0.532934	-1	FALSE
all	DARS1_A375_gRNA1449	A375	DARS1	ACATATCGTAAGAGTTGGACTGT	ACAGTCCAACTCTTACGATATGT	ENST00000264161	ATTTGGTAAAGGAAAAGTATGATACAGATTTTTATATTCTTGATAAATATCCATTGGCTGTAAGACCTTTCTATACCATGCCTGACCCAAGAAATCCCAAACAGTCCAACTCTTACGATATGTTCATGAGAGGAGAAGAAATATTGTCAGGAGCTCAAAGAATACATGATCCTCAACTGCTAACAGAGAGAGCTTTACATCATGGAATTGATTTGGAGAAAAT	aacccctaccaactggtcggggtttgaaac	-15.2	((((((.(((....))).)))))).......((..((....))..))......	-35.08	na	0.566673,0.005286,0.197398,0.671020,0.573259,0.423578,0.276927,0.701038,0.864640,0.926618,0.761602,0.013144,0.192628,0.996662,0.786233,0.897467,0.970806,0.836262,0.492039,0.959531,0.831752,0.479501,0.832473,0.607312,0.987728,0.841592,0.739140,0.920071,0.850363,0.576493,0.978904,0.215928,0.149592,0.050563,0.778551,0.808600,0.472245,0.261753,0.020190,0.102507,0.140495,0.004402,0.404986,0.414701,0.3…	101	123	1349	1571	na	na	0	na	na	0.613299	0.376959	1449	1471	217	1719	0	1	0	-1	0.819694	-1	FALSE
all	DARS1_A375_gRNA1497	A375	DARS1	GATCATGTATTCTTTGAGCTCCT	AGGAGCTCAAAGAATACATGATC	ENST00000264161	ATCCATTGGCTGTAAGACCTTTCTATACCATGCCTGACCCAAGAAATCCCAAACAGTCCAACTCTTACGATATGTTCATGAGAGGAGAAGAAATATTGTCAGGAGCTCAAAGAATACATGATCCTCAACTGCTAACAGAGAGAGCTTTACATCATGGAATTGATTTGGAGAAAATTAAGGCTTACATTGATTCCTTCCGCTTTGGAGCCCCTCCTCATGCTGG	aacccctaccaactggtcggggtttgaaac	-12.8	((((((.(((....))).)))))).............................	-37.43	na	0.560778,0.029512,0.065308,0.833264,0.797973,0.038504,0.128286,0.587230,0.933293,0.976896,0.697540,0.002294,0.302369,0.998489,0.692496,0.893881,0.962572,0.678692,0.506832,0.788484,0.591043,0.329670,0.704985,0.544774,0.971157,0.986665,0.176365,0.893110,0.939335,0.912299,0.801359,0.074669,0.108260,0.057119,0.709279,0.566772,0.023621,0.028236,0.003494,0.466395,0.037078,0.065031,0.353843,0.271842,0.4…	101	123	1397	1619	na	na	0	na	na	0.63363	0.356629	1497	1519	217	1719	0	1	0	-1	0.85163	-1	FALSE
all	DARS1_A375_gRNA1524	A375	DARS1	GTAAAGCTCTCTCTGTTAGCAGT	ACTGCTAACAGAGAGAGCTTTAC	ENST00000264161	CCATGCCTGACCCAAGAAATCCCAAACAGTCCAACTCTTACGATATGTTCATGAGAGGAGAAGAAATATTGTCAGGAGCTCAAAGAATACATGATCCTCAACTGCTAACAGAGAGAGCTTTACATCATGGAATTGATTTGGAGAAAATTAAGGCTTACATTGATTCCTTCCGCTTTGGAGCCCCTCCTCATGCTGGTGGAGGCATTGGATTGGAACGAGTTAC	aacccctaccaactggtcggggtttgaaac	-13.6	((((((.(((....))).))))))...........(((..(...)..)))...	-37.01	na	0.436281,0.011219,0.010110,0.876393,0.913426,0.019361,0.242603,0.650672,0.876064,0.931356,0.747833,0.002719,0.384385,0.999653,0.645999,0.977977,0.945004,0.706914,0.283897,0.894324,0.561066,0.527554,0.817418,0.679091,0.778812,0.957360,0.281652,0.953446,0.967259,0.939723,0.588229,0.008353,0.036265,0.073563,0.615435,0.539267,0.027428,0.027768,0.001561,0.533450,0.001958,0.033414,0.252085,0.192240,0.5…	101	123	1424	1646	na	na	0	na	na	0.645066	0.345193	1524	1546	217	1719	0	1	0	-1	0.869594	-1	FALSE
all	DARS1_A375_gRNA1531	A375	DARS1	CCATGATGTAAAGCTCTCTCTGT	ACAGAGAGAGCTTTACATCATGG	ENST00000264161	TGACCCAAGAAATCCCAAACAGTCCAACTCTTACGATATGTTCATGAGAGGAGAAGAAATATTGTCAGGAGCTCAAAGAATACATGATCCTCAACTGCTAACAGAGAGAGCTTTACATCATGGAATTGATTTGGAGAAAATTAAGGCTTACATTGATTCCTTCCGCTTTGGAGCCCCTCCTCATGCTGGTGGAGGCATTGGATTGGAACGAGTTACTATGCTG	aacccctaccaactggtcggggtttgaaac	-12.8	((((((.(((....))).)))))).............................	-39.12	na	0.594821,0.040041,0.006177,0.708619,0.950109,0.020609,0.238041,0.672682,0.598167,0.839710,0.820797,0.003218,0.247892,0.998397,0.668693,0.974257,0.930429,0.654057,0.457464,0.711430,0.554204,0.558613,0.863334,0.709524,0.467171,0.937820,0.174417,0.928297,0.973511,0.929272,0.593649,0.004236,0.060084,0.074334,0.352348,0.484396,0.009641,0.027503,0.001667,0.551221,0.002304,0.048331,0.322387,0.199042,0.3…	101	123	1431	1653	na	na	0	na	na	0.64803	0.342228	1531	1553	217	1719	0	1	0	-1	0.874251	-1	FALSE
all	INTS11_A375_gRNA357	A375	INTS11	ATGGCCTGGGTGGGGTGAGTCAT	ATGACTCACCCCACCCAGGCCAT	ENST00000435064	AGACTTCCTGGACTGTGTGATCATTAGCCACTTCCACCTGGACCACTGCGGGGCACTCCCCTACTTCAGCGAGATGGTGGGCTACGACGGGCCCATCTACATGACTCACCCCACCCAGGCCATCTGCCCCATCTTGCTGGAGGACTACCGCAAGATCGCCGTAGACAAGAAGGGCGAGGCCAACTTCTTCACCTCCCAGATGATCAAAGACTGCATGAAGAAG	aacccctaccaactggtcggggtttgaaac	-19.2	.(((((.(((....(((((.(........).)))))..)))))))).......	-44.45	-1,-1,-1,-1,-1,-1,-1,-1,-1,-1,-1,-1,-1,-1,-1,-1,-1,-1,-1,-1,-1,-1,-1,-1,-1,-1,-1,0.118,0.295,0.029,0.382,0.558,0.353,0.147,0.206,0.264,0.088,0,0.029,0.059,0.497,0.614,0.205,0.351,0.292,0.175,0.642,0.409,0.292,0.088,0.262,0.262,0.146,0.815,1,0.843,0.058,0.262,0.087,0,0.726,1,1,0.377,1,0.551,0.935,0.783,0.725,0.058,1,0.866,0.522,0.435,0.261,0.867,0.435,0.493,0.29,0.029,0.058,0.116,0.29,0.261,0.348,…	0.027620,0.159386,0.333036,0.000019,0.349385,0.046559,0.031440,0.014795,0.009874,0.735675,0.137851,0.019723,0.722652,0.044928,0.781216,0.422870,0.013795,0.066763,0.028920,0.001969,0.097384,0.445111,0.016106,0.119507,0.000635,0.378577,0.069101,0.000314,0.003194,0.175912,0.021317,0.029343,0.121195,0.191216,0.019433,0.050702,0.009634,0.000083,0.006395,0.003884,0.007143,0.141545,0.011343,0.000258,0.0…	101	123	257	479	na	na	0	na	na	0.165736	0.823557	357	379	84	1883	0	1	0	-1	0.151667	-1	FALSE
all	INTS11_A375_gRNA397	A375	INTS11	TACGGCGATCTTGCGGTAGTCCT	AGGACTACCGCAAGATCGCCGTA	ENST00000435064	GACCACTGCGGGGCACTCCCCTACTTCAGCGAGATGGTGGGCTACGACGGGCCCATCTACATGACTCACCCCACCCAGGCCATCTGCCCCATCTTGCTGGAGGACTACCGCAAGATCGCCGTAGACAAGAAGGGCGAGGCCAACTTCTTCACCTCCCAGATGATCAAAGACTGCATGAAGAAGGTGGTGGCTGTCCACCTCCACCAGACGGTCCAGGTAGATG	aacccctaccaactggtcggggtttgaaac	-21.9	((((((.(((....))).))))))....(((((.(((....))).)))))...	-37.8	0.497,0.614,0.205,0.351,0.292,0.175,0.642,0.409,0.292,0.088,0.262,0.262,0.146,0.815,1,0.843,0.058,0.262,0.087,0,0.726,1,1,0.377,1,0.551,0.935,0.783,0.725,0.058,1,0.866,0.522,0.435,0.261,0.867,0.435,0.493,0.29,0.029,0.058,0.116,0.29,0.261,0.348,0.726,0.174,0,0.029,0,0.029,0,0.029,0.116,0.174,0.087,0.465,0.61,0.349,0.349,0.523,0.436,0.966,0.581,0.407,0.233,0.611,0.436,0.349,0.116,0.116,0.524,0.436,…	0.014158,0.390997,0.148085,0.000049,0.414852,0.144402,0.148601,0.011490,0.035824,0.821738,0.216491,0.037645,0.046263,0.011923,0.855507,0.075556,0.020886,0.070295,0.118612,0.081718,0.119509,0.654041,0.009045,0.292244,0.021614,0.557189,0.148861,0.008410,0.003059,0.143628,0.028666,0.264915,0.230666,0.060773,0.142888,0.019736,0.044365,0.000711,0.007778,0.009776,0.012914,0.196510,0.015768,0.001211,0.2…	101	123	297	519	na	na	0	na	na	0.184358	0.804935	397	419	84	1883	0	1	0	-1	0.173889	-1	FALSE
all	INTS11_A375_gRNA520	A375	INTS11	GTAGGCCTTGATCTCCAGCTCAT	ATGAGCTGGAGATCAAGGCCTAC	ENST00000435064	GACAAGAAGGGCGAGGCCAACTTCTTCACCTCCCAGATGATCAAAGACTGCATGAAGAAGGTGGTGGCTGTCCACCTCCACCAGACGGTCCAGGTAGATGATGAGCTGGAGATCAAGGCCTACTATGCAGGCCACGTGCTGGGGGCAGCCATGTTCCAGATTAAAGTGGGCTCAGAGTCTGTGGTCTACACGGGTGATTATAACATGACCCCAGACCGACACT	aacccctaccaactggtcggggtttgaaac	-13.8	............((((((((((((((.....))))))))))...)))).....	-41.77	1,0.971,0.897,0.817,0.817,0.676,0.897,0.21,0.12,0.12,0,0.15,0.308,0.092,0.277,0.154,0.031,0.252,0.377,0.189,0,0.189,0.032,0.032,0.289,0.129,0.064,0,0.099,0.164,0.066,0.131,0,0.235,0.201,0.537,0.57,0.308,0.739,0.548,0.274,0.616,1,1,0.653,0.724,0.964,0.328,0.664,0.505,0.437,0.867,0.622,0.676,0.588,0.622,0.418,0.837,0.288,0,0.082,0.041,0.178,0,0.045,0.178,0.045,0.144,0.192,0.436,0.436,0.048,0.206,0.…	0.442014,0.467879,0.766048,0.255358,0.095941,0.350620,0.182095,0.479623,0.418399,0.694017,0.036228,0.542736,0.133098,0.690967,0.776974,0.011451,0.174323,0.426742,0.595267,0.390335,0.719529,0.881418,0.247848,0.886916,0.097855,0.229082,0.025936,0.171344,0.153280,0.365588,0.024655,0.333472,0.687956,0.328176,0.882950,0.023257,0.072014,0.089133,0.603280,0.015864,0.435026,0.417130,0.045615,0.006532,0.6…	101	123	420	642	na	na	0	na	na	0.24162	0.747672	520	542	84	1883	0	1	0	-1	0.242222	-1	FALSE
all	INTS11_A375_gRNA630	A375	INTS11	GCAGCTCCTAAGTGTCGGTCTGG	CCAGACCGACACTTAGGAGCTGC	ENST00000435064	GATCAAGGCCTACTATGCAGGCCACGTGCTGGGGGCAGCCATGTTCCAGATTAAAGTGGGCTCAGAGTCTGTGGTCTACACGGGTGATTATAACATGACCCCAGACCGACACTTAGGAGCTGCCTGGATTGACAAGTGCCGCCCCAACCTGCTCATCACAGAGTCCACGTACGCCACGACCATCCGTGACTCCAAGCGCTGCCGGGAGCGAGACTTCCTGAAG	aacccctaccaactggtcggggtttgaaac	-16.1	((((((.(((....))).)))))).......(((..((........)).))).	-41.59	-1,-1,-1,-1,-1,-1,-1,-1,-1,-1,-1,-1,-1,-1,-1,-1,-1,-1,-1,-1,-1,-1,-1,-1,-1,-1,-1,-1,-1,-1,-1,-1,-1,-1,-1,-1,-1,-1,-1,-1,-1,-1,-1,-1,-1,-1,-1,-1,-1,-1,-1,-1,-1,-1,-1,-1,-1,-1,-1,-1,-1,-1,-1,-1,-1,-1,-1,-1,-1,-1,-1,-1,-1,-1,-1,-1,-1,-1,-1,-1,-1,-1,-1,-1,-1,-1,-1,-1,-1,-1,-1,-1,-1,-1,-1,-1,-1,-1,-1,-1,-1,-1,-1,-1,-1,-1,-1,-1,-1,-1,-1,-1,-1,-1,-1,-1,-1,-1,-1,-1,-1,1,0.403,0.202,0.101,0,0.252,1,1,1,1,…	0.437393,0.376832,0.213080,0.074072,0.295455,0.398868,0.049602,0.562465,0.050131,0.903249,0.151975,0.100262,0.065650,0.526220,0.738106,0.247770,0.035993,0.092979,0.420980,0.256866,0.740472,0.872024,0.451981,0.814497,0.484604,0.168800,0.150430,0.204560,0.220536,0.084475,0.493159,0.104276,0.174527,0.116798,0.131218,0.016759,0.034103,0.193503,0.104016,0.007862,0.201343,0.057822,0.100308,0.063301,0.3…	101	123	530	752	na	na	0	na	na	0.292831	0.696462	630	652	84	1883	0	1	0	-1	0.303333	-1	FALSE
all	INTS11_A375_gRNA646	A375	INTS11	GCACTTGTCAATCCAGGCAGCTC	GAGCTGCCTGGATTGACAAGTGC	ENST00000435064	GCAGGCCACGTGCTGGGGGCAGCCATGTTCCAGATTAAAGTGGGCTCAGAGTCTGTGGTCTACACGGGTGATTATAACATGACCCCAGACCGACACTTAGGAGCTGCCTGGATTGACAAGTGCCGCCCCAACCTGCTCATCACAGAGTCCACGTACGCCACGACCATCCGTGACTCCAAGCGCTGCCGGGAGCGAGACTTCCTGAAGAAAGTCCACGAGACCG	aacccctaccaactggtcggggtttgaaac	-16.1	((((((.(((....))).))))))......((...((((......))))))..	-40.01	-1,-1,-1,-1,-1,-1,-1,-1,-1,-1,-1,-1,-1,-1,-1,-1,-1,-1,-1,-1,-1,-1,-1,-1,-1,-1,-1,-1,-1,-1,-1,-1,-1,-1,-1,-1,-1,-1,-1,-1,-1,-1,-1,-1,-1,-1,-1,-1,-1,-1,-1,-1,-1,-1,-1,-1,-1,-1,-1,-1,-1,-1,-1,-1,-1,-1,-1,-1,-1,-1,-1,-1,-1,-1,-1,-1,-1,-1,-1,-1,-1,-1,-1,-1,-1,-1,-1,-1,-1,-1,-1,-1,-1,-1,-1,-1,-1,-1,-1,-1,-1,-1,-1,-1,-1,1,0.403,0.202,0.101,0,0.252,1,1,1,1,0.961,0.961,1,0.661,0.508,0.667,0.308,0.257,0.05…	0.205651,0.180290,0.058342,0.021792,0.337885,0.271387,0.015890,0.341216,0.005320,0.938010,0.181174,0.024618,0.137424,0.195985,0.738216,0.425482,0.016898,0.080650,0.243051,0.087397,0.588808,0.733999,0.272933,0.695373,0.652640,0.176166,0.211962,0.082157,0.088376,0.367425,0.260711,0.007344,0.041941,0.033826,0.079694,0.006020,0.003093,0.101006,0.021392,0.102701,0.078312,0.041455,0.026531,0.056217,0.3…	101	123	546	768	na	na	0	na	na	0.300279	0.689013	646	668	84	1883	0	1	0	-1	0.312222	-1	FALSE
all	INTS11_A375_gRNA903	A375	INTS11	AGCTTGTAGTAGTGGTTGGCCTT	AAGGCCAACCACTACTACAAGCT	ENST00000435064	CGCGCTGGGCCGCGCCCAGGAGCTCTGCATCCTCCTGGAGACCTTCTGGGAGCGCATGAACCTGAAGGTGCCCATCTACTTCTCCACGGGGCTGACCGAGAAGGCCAACCACTACTACAAGCTGTTCATCCCCTGGACCAACCAGAAGATCCGCAAGACTTTCGTGCAGAGGAACATGTTTGAGTTCAAGCACATCAAGGCCTTCGACCGGGCTTTTGCTGAC	aacccctaccaactggtcggggtttgaaac	-16.2	((((((.(((....))).)))))).....(((((.........))))).....	-40.1	-1,-1,-1,-1,-1,-1,-1,-1,-1,-1,-1,-1,-1,-1,-1,-1,-1,-1,-1,-1,-1,-1,-1,-1,-1,-1,-1,-1,-1,-1,-1,-1,-1,-1,-1,-1,-1,-1,-1,-1,-1,-1,-1,-1,-1,-1,-1,-1,-1,-1,0.343,0.211,0.343,0.211,1,0.74,1,0.925,0.713,0.528,0.159,0.264,0.688,1,1,0.452,0.372,0.478,0.97,0.638,0.32,0.213,0.827,1,0.774,0.911,1,0.911,0.804,1,0.863,0.596,0.244,0.108,0.514,0.192,0.11,0.055,0.219,0.192,0.249,0.111,0.166,0.415,0.415,0.084,0.14,…	0.281620,0.263068,0.888424,0.016354,0.308639,0.058144,0.172307,0.018006,0.607382,0.989426,0.072119,0.019272,0.508755,0.415778,0.745268,0.041291,0.627015,0.044549,0.123658,0.010229,0.323898,0.436282,0.020722,0.685183,0.027949,0.983096,0.111513,0.004754,0.090495,0.909371,0.049214,0.022528,0.179792,0.218998,0.523748,0.016915,0.029368,0.023137,0.030409,0.129372,0.729191,0.178136,0.070011,0.005002,0.3…	101	123	803	1025	na	na	0	na	na	0.419926	0.569367	903	925	84	1883	0	1	0	-1	0.455	-1	FALSE
all	SPOUT1_A375_gRNA498	A375	SPOUT1	AAGAACGCCTTCCTCAGGTACTG	CAGTACCTGAGGAAGGCGTTCTT	ENST00000361256	CCAGGATGCCAAGACTGTGGAGGGGGAATTCACAGGAGTTGGGAAGAAGGGGCAGGCGTGCGTACAGCTGGCCCGGATCCTGCAGTACCTGGAGTGTCCACAGTACCTGAGGAAGGCGTTCTTCCCCAAGCACCAGGATCTACAGTTTGCAGGGCTCCTGAACCCCCTGGACAGCCCCCACCACATGCGTCAGGATGAGGAATCCGAGTTCCGAGAGGGCATC	aacccctaccaactggtcggggtttgaaac	-15.4	((((((.(((....))).))))))............((((.....))))....	-37.86	0.143,0,0,0.286,0.429,0.143,0.571,0.429,0.286,0.143,0.714,0,-1,-1,-1,-1,-1,-1,-1,-1,-1,-1,-1,-1,-1,-1,-1,-1,-1,-1,-1,-1,-1,-1,-1,-1,-1,-1,-1,-1,-1,-1,-1,-1,-1,-1,-1,-1,-1,-1,-1,-1,-1,-1,-1,-1,-1,-1,-1,-1,-1,-1,-1,-1,-1,-1,-1,-1,-1,-1,-1,-1,-1,-1,-1,-1,-1,-1,-1,-1,-1,-1,-1,-1,-1,-1,-1,-1,-1,-1,-1,-1,-1,-1,-1,-1,-1,-1,-1,-1,-1,-1,-1,-1,-1,-1,-1,-1,-1,-1,-1,-1,-1,-1,-1,-1,-1,-1,-1,-1,-1,-1,-1,-1,-1,…	0.513099,0.594137,0.726724,0.341659,0.451093,0.520079,0.400727,0.815942,0.838378,0.552148,0.015326,0.789142,0.024911,0.903484,0.370012,0.000032,0.038490,0.543027,0.730660,0.895722,0.819915,0.882790,0.496948,0.947039,0.670615,0.524377,0.030726,0.025027,0.784200,0.309402,0.142243,0.462824,0.731947,0.099835,0.721654,0.077318,0.208557,0.623558,0.673252,0.000084,0.681582,0.162828,0.445250,0.097969,0.4…	101	123	398	620	na	na	0	na	na	0.115959	0.878675	498	520	42	1169	0	1	0	-1	0.404255	-1	FALSE
all	SPOUT1_A375_gRNA532	A375	SPOUT1	GAGCCCTGCAAACTGTAGATCCT	AGGATCTACAGTTTGCAGGGCTC	ENST00000361256	GGAGTTGGGAAGAAGGGGCAGGCGTGCGTACAGCTGGCCCGGATCCTGCAGTACCTGGAGTGTCCACAGTACCTGAGGAAGGCGTTCTTCCCCAAGCACCAGGATCTACAGTTTGCAGGGCTCCTGAACCCCCTGGACAGCCCCCACCACATGCGTCAGGATGAGGAATCCGAGTTCCGAGAGGGCATCGTGGTGGATCGGCCCACCCGGCCAGGCCACGGCT	aacccctaccaactggtcggggtttgaaac	-16.1	((((((.(((....))).))))))...........(((((...))))).....	-39.81	-1,-1,-1,-1,-1,-1,-1,-1,-1,-1,-1,-1,-1,-1,-1,-1,-1,-1,-1,-1,-1,-1,-1,-1,-1,-1,-1,-1,-1,-1,-1,-1,-1,-1,-1,-1,-1,-1,-1,-1,-1,-1,-1,-1,-1,-1,-1,-1,-1,-1,-1,-1,-1,-1,-1,-1,-1,-1,-1,-1,-1,-1,-1,-1,-1,-1,-1,-1,-1,-1,-1,-1,-1,-1,-1,-1,-1,-1,-1,-1,-1,-1,-1,-1,-1,-1,-1,-1,-1,-1,-1,-1,-1,-1,-1,-1,-1,-1,-1,-1,-1,-1,-1,-1,-1,-1,-1,-1,-1,-1,-1,-1,-1,-1,-1,-1,-1,-1,-1,-1,-1,-1,-1,-1,-1,-1,-1,-1,-1,-1,-1,-1,-1,…	0.528900,0.633198,0.611807,0.290782,0.473398,0.757805,0.363465,0.805632,0.916486,0.629955,0.028360,0.787015,0.042723,0.923915,0.204573,0.000059,0.063354,0.482306,0.692864,0.913212,0.818742,0.908482,0.448562,0.924842,0.398161,0.238456,0.071467,0.002721,0.890769,0.468615,0.120903,0.231435,0.605226,0.134775,0.889585,0.033262,0.190480,0.733290,0.515889,0.000099,0.732640,0.287144,0.392181,0.077816,0.5…	101	123	432	654	na	na	0	na	na	0.123892	0.870742	532	554	42	1169	0	1	0	-1	0.434397	-1	FALSE
all	SPOUT1_A375_gRNA852	A375	SPOUT1	GGGGCCTCAGCAAACACAGCACT	AGTGCTGTGTTTGCTGAGGCCCC	ENST00000361256	AGACTGCAAGACCTACCATGGCAAAGTGGTATCATCGCAGGACCCTCGCACCAAAGCTGGTCTCTACTGGGGCTACACCGTCCGACTGGCTTCCTGCCTCAGTGCTGTGTTTGCTGAGGCCCCCTTCCAAGATGGGTATGACCTGACCATCGGGACGTCAGAGCGCGGCTCAGATGTGGCCTCTGCCCAGCTTCCCAACTTCAGGCATGCTCTTGTGGTGTTC	aacccctaccaactggtcggggtttgaaac	-13.2	((((((.(((....))).))))))...............((.......))...	-45.36	-1,-1,-1,-1,-1,-1,-1,-1,-1,-1,-1,-1,-1,-1,-1,-1,-1,-1,-1,-1,-1,-1,-1,-1,-1,-1,-1,-1,-1,-1,-1,-1,-1,-1,-1,-1,-1,-1,-1,-1,-1,-1,-1,-1,-1,-1,-1,-1,-1,-1,-1,-1,-1,-1,-1,-1,-1,-1,-1,-1,-1,-1,-1,-1,-1,-1,-1,-1,-1,-1,-1,-1,-1,-1,-1,-1,-1,-1,-1,-1,-1,-1,-1,-1,-1,-1,-1,-1,-1,-1,-1,-1,-1,-1,-1,-1,-1,-1,-1,-1,-1,-1,-1,-1,-1,-1,-1,-1,-1,-1,-1,-1,-1,-1,-1,-1,-1,-1,-1,-1,-1,-1,-1,-1,-1,-1,-1,-1,-1,-1,-1,-1,-1,…	0.924380,0.833061,0.638276,0.094382,0.423011,0.796285,0.734263,0.831771,0.909428,0.553559,0.161186,0.884349,0.156961,0.690152,0.557685,0.000316,0.037898,0.433190,0.857981,0.842111,0.871626,0.960072,0.589685,0.966373,0.486677,0.033863,0.140515,0.464819,0.793020,0.781081,0.152745,0.588822,0.938336,0.487704,0.821274,0.417940,0.378031,0.380235,0.718925,0.000083,0.571283,0.808753,0.490920,0.150273,0.3…	101	123	752	974	na	na	0	na	na	0.198553	0.79608	852	874	42	1169	0	1	0	-1	0.718085	-1	FALSE
all	SPOUT1_A375_gRNA952	A375	SPOUT1	GAACACCACAAGAGCATGCCTGA	TCAGGCATGCTCTTGTGGTGTTC	ENST00000361256	AGTGCTGTGTTTGCTGAGGCCCCCTTCCAAGATGGGTATGACCTGACCATCGGGACGTCAGAGCGCGGCTCAGATGTGGCCTCTGCCCAGCTTCCCAACTTCAGGCATGCTCTTGTGGTGTTCGGGGGCCTCCAGGGTCTGGAAGCTGGAGCGGATGCTGACCCCAACCTGGAGGTGGCTGAACCCAGTGTCCTCTTTGACCTGTACGTCAATACCTGTCCTG	aacccctaccaactggtcggggtttgaaac	-12.8	((((((.(((....))).)))))).............................	-41.26	-1,-1,-1,-1,-1,-1,-1,-1,-1,-1,-1,-1,-1,-1,-1,-1,-1,-1,-1,-1,-1,-1,-1,-1,-1,-1,-1,-1,-1,-1,-1,-1,-1,-1,-1,-1,-1,-1,-1,-1,-1,-1,-1,-1,-1,-1,-1,-1,-1,-1,-1,-1,-1,-1,-1,-1,-1,-1,-1,-1,-1,-1,-1,-1,-1,-1,-1,-1,-1,-1,-1,-1,-1,-1,-1,-1,-1,-1,-1,-1,-1,-1,-1,-1,-1,-1,-1,-1,-1,-1,-1,-1,-1,-1,-1,-1,-1,-1,-1,-1,-1,-1,-1,-1,-1,-1,-1,-1,-1,-1,-1,-1,-1,-1,-1,-1,-1,-1,-1,-1,-1,0.078,0,0,0,0.078,0,0.155,0,0.155,0,…	0.311929,0.588543,0.215759,0.092627,0.077670,0.528836,0.505334,0.464744,0.108577,0.838747,0.072020,0.324273,0.134537,0.054526,0.939922,0.046439,0.015140,0.046433,0.489296,0.083781,0.569541,0.752683,0.071165,0.602513,0.034977,0.000076,0.428280,0.010207,0.764586,0.326923,0.142909,0.400594,0.937811,0.293848,0.085970,0.264185,0.131351,0.172076,0.277703,0.007744,0.153562,0.707255,0.190449,0.123751,0.4…	101	123	852	1074	na	na	0	na	na	0.221885	0.772748	952	974	42	1169	0	1	0	-1	0.806738	-1	FALSE
all	SPOUT1_A375_gRNA1066	A375	SPOUT1	ACGGCTACCCTGGCCAGGACAGG	CCTGTCCTGGCCAGGGTAGCCGT	ENST00000361256	GTGGTGTTCGGGGGCCTCCAGGGTCTGGAAGCTGGAGCGGATGCTGACCCCAACCTGGAGGTGGCTGAACCCAGTGTCCTCTTTGACCTGTACGTCAATACCTGTCCTGGCCAGGGTAGCCGTACCATCCGCACGGAGGAAGCCATCCTCATCTCCCTGGCCGCCCTGCAGCCTGGCCTCATCCAGGCGGGTGCCCGGCACACCTGAAAGTTCTAAGGGGCCG	aacccctaccaactggtcggggtttgaaac	-20.4	....(((.....(((((((((((.............)))))))))))...)))	-42.11	-1,-1,-1,-1,-1,-1,-1,0.078,0,0,0,0.078,0,0.155,0,0.155,0,0.387,0.697,0.387,0,0,0.387,0.31,0.62,0.077,0,0.077,0.077,0.155,0.155,0.077,0,0.155,0.077,1,0.232,0,0.077,0.31,0,0,0.31,0.077,0.31,1,0.697,0.155,0,0.232,0.542,1,0.926,0.387,0.232,0.387,0.464,0.077,0.464,0,0,0.077,0.155,0.077,0,0,0,0.31,0.232,0,0.232,0.155,0.31,0.464,0.387,0.387,0.155,0.155,0.155,0.077,0.077,0.774,0.542,1,0.697,0.077,0.155,0…	0.112505,0.749253,0.663395,0.000069,0.276889,0.323151,0.346386,0.020726,0.243521,0.632878,0.967347,0.036519,0.018374,0.150752,0.809618,0.041067,0.160552,0.016487,0.113649,0.006212,0.723027,0.593171,0.008523,0.660361,0.347919,0.086400,0.425957,0.000987,0.064393,0.365618,0.014598,0.000488,0.724111,0.274152,0.203767,0.321793,0.045375,0.221501,0.948092,0.052785,0.062558,0.367012,0.330918,0.099043,0.3…	101	123	966	1188	na	na	0	na	na	0.248483	0.74615	1066	1088	42	1169	0	1	0	-1	0.907801	-1	FALSE
all	SPOUT1_A375_gRNA1165	A375	SPOUT1	GGCCCCTTAGAACTTTCAGGTGT	ACACCTGAAAGTTCTAAGGGGCC	ENST00000361256	ACCTGTCCTGGCCAGGGTAGCCGTACCATCCGCACGGAGGAAGCCATCCTCATCTCCCTGGCCGCCCTGCAGCCTGGCCTCATCCAGGCGGGTGCCCGGCACACCTGAAAGTTCTAAGGGGCCGAGGACATCAGTGAAGCAGCAGTGAAACCAGGGGCTCTGCAGGTCACTTGGGACGGACGCCACCAGACTTGTCTCCAAAAATCACCACCTTTAATACTCC	aacccctaccaactggtcggggtttgaaac	-14.3	.(((((.(((....))).)))))((((((.(..(.....)..)))))))....	-39.11	1,0.385,0.154,0.231,0.231,0.385,0.077,0.308,0.231,0.154,0,0.154,0.538,0.538,0,0,0.077,0.308,0.308,0.077,0.154,0.538,0.385,0.538,0.231,0.077,0.462,0.462,0.308,0,0.385,0.231,0.077,0.154,0,0.231,0.077,0,0.077,0.113,0.15,0.113,0.414,0.075,0.149,0.262,0.075,0.112,0.187,0.074,0.408,0.706,0.26,0.334,0.148,0.037,0.037,0.148,0.148,0.073,0.073,0.037,0.22,0.184,0.037,0.037,0.183,0.365,0.073,0.109,0.146,0,0,…	0.490423,0.937326,0.806604,0.002751,0.014889,0.702079,0.176928,0.017024,0.076796,0.931054,0.572614,0.066055,0.015102,0.173634,0.616281,0.312258,0.011763,0.011812,0.083562,0.013518,0.112338,0.330828,0.059933,0.272010,0.050886,0.280646,0.330396,0.000619,0.106207,0.351203,0.041763,0.027272,0.691299,0.307246,0.729060,0.500452,0.517568,0.086167,0.719890,0.456647,0.669309,0.744964,0.003648,0.000884,0.4…	101	123	1065	1287	na	na	0	na	na	0.271582	0.723052	1165	1187	42	1169	0	1	0	-1	0.995567	-1	FALSE
all	CWC22_A375_gRNA443	A375	CWC22	ATGCTCATAGTCTGATCTGCTGT	ACAGCAGATCAGACTATGAGCAT	ENST00000410053	GACAGAAGGGAAAACCTTAATTCATATCAGAGGAACTCCTCTCCAGAAGACAGATATGAAGAACAAGAACGATCCCCCCGGGATAGAGATTACTTTGATTACAGCAGATCAGACTATGAGCATTCAAGAAGAGGACGTTCTTATGATAGTAGCATGGAGTCACGAAACAGGGACCGAGAAAAACGCAGAGAAAGAGAAAGAGATACGGATCGGAAAAGGTCTC	aacccctaccaactggtcggggtttgaaac	-14	((((((.(((....))).))))))....(((.(((((.....)))...)))))	-38	na	0.477274,0.027581,0.078479,0.815065,0.554175,0.284530,0.480324,0.654726,0.560316,0.970104,0.315185,0.094791,0.672758,0.984387,0.485140,0.989256,0.997651,0.657729,0.615104,0.935842,0.616636,0.256633,0.449972,0.549050,0.713747,0.979568,0.529872,0.880591,0.932963,0.619420,0.987071,0.234638,0.097467,0.079660,0.598999,0.771967,0.149657,0.044162,0.002535,0.380912,0.265962,0.007578,0.321962,0.033466,0.3…	101	123	343	565	na	na	0	na	na	0.134756	0.858232	443	465	301	3024	0	1	0	-1	0.0521292	-1	FALSE
all	CWC22_A375_gRNA446	A375	CWC22	TGAATGCTCATAGTCTGATCTGC	GCAGATCAGACTATGAGCATTCA	ENST00000410053	AGAAGGGAAAACCTTAATTCATATCAGAGGAACTCCTCTCCAGAAGACAGATATGAAGAACAAGAACGATCCCCCCGGGATAGAGATTACTTTGATTACAGCAGATCAGACTATGAGCATTCAAGAAGAGGACGTTCTTATGATAGTAGCATGGAGTCACGAAACAGGGACCGAGAAAAACGCAGAGAAAGAGAAAGAGATACGGATCGGAAAAGGTCTCGGA	aacccctaccaactggtcggggtttgaaac	-13.2	((((((.(((....))).)))))).((...(((....)))...))........	-38.09	na	0.280766,0.029892,0.064339,0.851430,0.635373,0.320847,0.497994,0.697022,0.543504,0.991888,0.374068,0.025099,0.706012,0.970159,0.435793,0.995785,0.996070,0.601315,0.577883,0.949398,0.680824,0.248696,0.414728,0.528549,0.772588,0.975492,0.263644,0.839357,0.890104,0.553709,0.988190,0.182513,0.092684,0.092599,0.694965,0.782615,0.236854,0.055087,0.003006,0.411041,0.332108,0.005645,0.392560,0.043421,0.4…	101	123	346	568	na	na	0	na	na	0.135671	0.857317	446	468	301	3024	0	1	0	-1	0.0532305	-1	FALSE
all	CWC22_A375_gRNA761	A375	CWC22	GGCCTCCCAACTCATCCTCTGGT	ACCAGAGGATGAGTTGGGAGGCC	ENST00000410053	GAGCTGGATCCTCTTCTTACTCGCACTGGTGGAGCATATATTCCCCCTGCAAAGCTCAGGATGATGCAGGAACAGATTACAGATAAAAACAGCTTAGCATACCAGAGGATGAGTTGGGAGGCCCTGAAGAAGTCAATTAATGGCCTTATCAACAAAGTCAACATTTCCAACATAAGTATTATTATTCAAGAGCTTCTTCAAGAAAATATAGTTAGAGGAAGAG	aacccctaccaactggtcggggtttgaaac	-13.6	((((((.(((....))).)))))).......(((................)))	-45.33	na	0.867423,0.134259,0.520651,0.918658,0.692636,0.070658,0.669227,0.735773,0.839783,0.995481,0.894023,0.012750,0.912882,0.994799,0.951862,0.994391,0.909289,0.625093,0.642797,0.911808,0.774575,0.339128,0.746594,0.469175,0.863044,0.921243,0.605593,0.897173,0.900343,0.576713,0.936406,0.587739,0.060062,0.134159,0.366706,0.684191,0.565096,0.185361,0.024076,0.366338,0.007750,0.404045,0.274588,0.060456,0.9…	101	123	661	883	na	na	0	na	na	0.231707	0.76128	761	783	301	3024	0	1	0	-1	0.168869	-1	FALSE
all	CWC22_A375_gRNA914	A375	CWC22	GGTGAAGATTGGAGAAGCACTCT	AGAGTGCTTCTCCAATCTTCACC	ENST00000410053	AAAGTCAACATTTCCAACATAAGTATTATTATTCAAGAGCTTCTTCAAGAAAATATAGTTAGAGGAAGAGGACTGCTGTCCAGGTCTGTTTTGCAAGCACAGAGTGCTTCTCCAATCTTCACCCATGTTTATGCAGCATTAGTGGCAATTATCAACTCAAAATTTCCACAAATTGGAGAATTAATCCTCAAAAGGTTAATTCTTAATTTTCGAAAAGGCTATC	aacccctaccaactggtcggggtttgaaac	-14.5	((((((.(((....))).)))))).....((((....))))(((.....))).	-38.58	na	0.634734,0.014349,0.013519,0.906343,0.911401,0.445249,0.663650,0.550903,0.753237,0.730153,0.987387,0.113560,0.471798,0.970187,0.415359,0.972642,0.717746,0.777050,0.620768,0.774424,0.961531,0.466293,0.637138,0.805184,0.565870,0.915543,0.362867,0.918844,0.985428,0.177435,0.877289,0.417454,0.174307,0.233986,0.745167,0.789923,0.588352,0.201382,0.027702,0.952208,0.029892,0.015913,0.784940,0.085728,0.2…	101	123	814	1036	na	na	0	na	na	0.278354	0.714634	914	936	301	3024	0	1	0	-1	0.225037	-1	FALSE
all	CWC22_A375_gRNA1101	A375	CWC22	AGCATAATACTTCGTGTGCCACA	TGTGGCACACGAAGTATTATGCT	ENST00000410053	TCAAAAGGTTAATTCTTAATTTTCGAAAAGGCTATCGAAGAAATGACAAGCAACTTTGCCTGACTGCTTCAAAATTTGTGGCGCATCTTATTAACCAAAATGTGGCACACGAAGTATTATGCTTAGAGATGCTCACTTTGCTCCTGGAAAGACCAACAGATGATAGCGTTGAAGTAGCTATTGGTTTTCTTAAGGAATGTGGCCTCAAATTAACACAAGTGTC	aacccctaccaactggtcggggtttgaaac	-16.5	((((((.(((....))).)))))).......(((((........)))))....	-34.29	na	0.709571,0.007421,0.053528,0.577982,0.904595,0.232673,0.420442,0.887741,0.949569,0.915848,0.922147,0.003228,0.128487,0.979224,0.045669,0.933961,0.931826,0.691814,0.409421,0.922450,0.967766,0.303990,0.875915,0.814772,0.741367,0.873502,0.248188,0.884505,0.831677,0.448175,0.985031,0.621498,0.174540,0.090913,0.970834,0.476753,0.352245,0.619942,0.066791,0.867382,0.034879,0.136595,0.275742,0.135328,0.6…	101	123	1001	1223	na	na	0	na	na	0.335366	0.657622	1101	1123	301	3024	0	1	0	-1	0.293686	-1	FALSE
all	CWC22_A375_gRNA2064	A375	CWC22	GACCCATGTATTCACACAGTTCC	GGAACTGTGTGAATACATGGGTC	ENST00000410053	TATACACTGATTCACTTCCATGGAGTGTTCTTGAATGTATAAAACTGAGTGAAGAAACCACTACATCATCCAGTAGAATTTTTGTCAAAATATTTTTCCAGGAACTGTGTGAATACATGGGTCTTCCTAAACTTAATGCAAGATTAAAGGATGAAACTCTGCAGCCATTCTTTGAAGGATTATTACCCCGAGATAATCCAAGAAACACTCGGTTTGCCATCAA	aacccctaccaactggtcggggtttgaaac	-13.2	((((((.(((....))).))))))((((((.......)).)))).........	-36.8	na	0.838542,0.116172,0.032621,0.893088,0.915872,0.223899,0.581314,0.896071,0.840752,0.517164,0.971338,0.007109,0.073943,0.995732,0.191916,0.870760,0.922209,0.651893,0.714953,0.909850,0.952284,0.401798,0.688940,0.886917,0.584393,0.800401,0.337717,0.959515,0.919643,0.249003,0.839742,0.016351,0.332824,0.044892,0.965908,0.769239,0.246125,0.144921,0.014577,0.620609,0.081154,0.004382,0.489560,0.032651,0.1…	101	123	1964	2186	na	na	0	na	na	0.628963	0.364024	2064	2086	301	3024	0	1	0	-1	0.64721	-1	FALSE
all	RUVBL2_A375_gRNA594	A375	RUVBL2	GCCAGCTGACCCACCATGCCTTG	CAAGGCATGGTGGGTCAGCTGGC	ENST00000595090	CCCGGAGATCCGTGATGTAACAAGGATTGAGCGAATCGGTGCCCACTCCCACATCCGGGGACTGGGGCTGGACGATGCCTTGGAGCCTCGGCAGGCTTCGCAAGGCATGGTGGGTCAGCTGGCGGCACGGCGGGCGGCTGGCGTGGTGCTGGAGATGATCCGGGAAGGGAAGATTGCCGGTCGGGCAGTCCTTATTGCTGGCCAGCCGGGCACGGGGAAGACG	aacccctaccaactggtcggggtttgaaac	-13.7	((((((.(((....))).))))))..........((((......)).))....	-45.96	-1,-1,-1,-1,-1,-1,-1,-1,-1,-1,-1,-1,-1,-1,-1,-1,-1,-1,-1,-1,-1,-1,-1,-1,-1,-1,-1,-1,-1,-1,-1,-1,-1,-1,-1,-1,-1,-1,-1,-1,-1,-1,-1,-1,-1,-1,-1,-1,-1,-1,-1,-1,-1,-1,-1,-1,-1,-1,-1,-1,-1,-1,-1,-1,-1,-1,-1,-1,-1,-1,-1,-1,-1,-1,-1,-1,-1,-1,-1,-1,-1,-1,-1,-1,-1,-1,-1,-1,-1,-1,-1,-1,-1,-1,-1,-1,0.534,0.584,1,1,0.813,0.789,0.178,0.153,0.153,0.509,0.612,0.943,1,1,0.943,0.612,1,0.689,0.255,0.817,1,0.435,0.2…	0.921704,0.980569,0.503015,0.401665,0.011394,0.677317,0.664560,0.368090,0.873130,0.956900,0.941338,0.937285,0.681800,0.240636,0.862253,0.864052,0.015413,0.024030,0.612782,0.223332,0.911021,0.408209,0.657945,0.774599,0.800319,0.000302,0.476063,0.138940,0.960708,0.290762,0.999987,0.746168,0.900693,0.711060,0.509236,0.783857,0.586295,0.808267,0.948665,0.950561,0.996909,0.705052,0.893217,0.969794,0.7…	101	123	494	716	na	na	0	na	na	0.295172	0.69338	594	616	465	1853	0	1	0	-1	0.0928726	-1	FALSE
all	RUVBL2_A375_gRNA673	A375	RUVBL2	GCCAGCAATAAGGACTGCCCGAC	GTCGGGCAGTCCTTATTGCTGGC	ENST00000595090	TTGGAGCCTCGGCAGGCTTCGCAAGGCATGGTGGGTCAGCTGGCGGCACGGCGGGCGGCTGGCGTGGTGCTGGAGATGATCCGGGAAGGGAAGATTGCCGGTCGGGCAGTCCTTATTGCTGGCCAGCCGGGCACGGGGAAGACGGCCATCGCCATGGGCATGGCGCAGGCCCTGGGCCCTGACACGCCATTCACAGCCATCGCCGGCAGTGAAATCTTCTCCC	aacccctaccaactggtcggggtttgaaac	-14.5	((((((.(((....))).)))))).....((...(((........))).))..	-38.76	-1,-1,-1,-1,-1,-1,-1,-1,-1,-1,-1,-1,-1,-1,-1,-1,-1,0.534,0.584,1,1,0.813,0.789,0.178,0.153,0.153,0.509,0.612,0.943,1,1,0.943,0.612,1,0.689,0.255,0.817,1,0.435,0.282,0.205,0.563,0.488,0.385,0.668,0.462,1,0.973,0.232,0.973,0.568,0.232,0.235,0.574,0.131,0.235,0.392,0.574,0.078,0.078,0.235,0.104,0.183,0.235,0.183,0.444,0.93,0.47,0.157,0.261,0.157,0.366,0.757,0.496,0.93,0.522,0.522,0.757,0.832,0.392,0…	0.951900,0.774920,0.426687,0.745591,0.122515,0.635797,0.472907,0.098284,0.046265,0.986819,0.974269,0.662534,0.706787,0.403463,0.984181,0.222506,0.530142,0.044336,0.640289,0.038810,0.553890,0.423347,0.070389,0.679353,0.639262,0.076097,0.548040,0.000991,0.774308,0.754900,0.913549,0.211295,0.875290,0.346490,0.930818,0.771177,0.057305,0.046367,0.428079,0.699276,0.979345,0.640969,0.044571,0.581651,0.8…	101	123	573	795	na	na	0	na	na	0.334495	0.654057	673	695	465	1853	0	1	0	-1	0.149748	-1	FALSE
all	RUVBL2_A375_gRNA867	A375	RUVBL2	ACCTCCCCTTCGATGATCTCCGT	ACGGAGATCATCGAAGGGGAGGT	ENST00000595090	AGCCATCGCCGGCAGTGAAATCTTCTCCCTGGAGATGAGCAAGACCGAGGCGCTGACGCAGGCCTTCCGGCGGTCCATCGGCGTTCGCATCAAGGAGGAGACGGAGATCATCGAAGGGGAGGTGGTGGAGATCCAGATTGATCGACCAGCAACAGGGACGGGCTCCAAGGTGGGCAAACTGACCCTCAAGACCACAGAGATGGAGACCATCTACGACCTGGGC	aacccctaccaactggtcggggtttgaaac	-12.8	((((((.(((....))).)))))).............................	-44.68	0.57,0.187,0.065,0.243,0.72,0.477,1,0.953,0.15,0.168,0.224,0.093,0.486,0.579,0.402,0.43,0.617,1,1,0.86,0.393,0.346,0.71,0.374,0.14,0.112,0.187,0.075,0.178,0.15,0.187,0.28,0.327,0.355,0.383,0.271,0.72,1,0.327,0.766,1,-1,-1,-1,-1,-1,-1,-1,-1,-1,-1,-1,-1,-1,-1,-1,-1,-1,-1,-1,-1,-1,-1,-1,-1,-1,-1,-1,-1,-1,-1,-1,-1,-1,-1,-1,-1,-1,-1,-1,-1,-1,-1,-1,-1,-1,-1,-1,-1,-1,-1,-1,-1,-1,-1,-1,-1,-1,-1,-1,-1,-1,…	0.849434,0.715447,0.625600,0.437426,0.231049,0.384651,0.771783,0.798352,0.929116,0.618778,0.045582,0.922057,0.140374,0.811689,0.487102,0.000189,0.173644,0.469804,0.820166,0.239173,0.853819,0.944999,0.499504,0.803019,0.585880,0.645809,0.112089,0.535501,0.741620,0.630105,0.203869,0.467718,0.895869,0.332269,0.794878,0.067108,0.397751,0.473953,0.914964,0.000133,0.865031,0.078686,0.473162,0.389736,0.8…	101	123	767	989	na	na	0	na	na	0.43106	0.557491	867	889	465	1853	0	1	0	-1	0.289417	-1	FALSE
all	RUVBL2_A375_gRNA1630	A375	RUVBL2	CTCCAGCCCGATGCGGGTCAGCA	TGCTGACCCGCATCGGGCTGGAG	ENST00000595090	ATCGTCTCCACCACCCCCTACAGCGAGAAAGACACGAAGCAGATCCTCCGCATCCGGTGCGAGGAAGAAGATGTGGAGATGAGTGAGGACGCCTACACGGTGCTGACCCGCATCGGGCTGGAGACGTCACTGCGCTACGCCATCCAGCTCATCACAGCTGCCAGCTTGGTGTGCCGGAAACGCAAGGGTACAGAAGTGCAGGTGGATGACATCAAGCGGGTCT	aacccctaccaactggtcggggtttgaaac	-19.1	((((((.(((....))).))))))...........(((((...))))).....	-39.34	0.762,0.224,0.313,0.326,-1,-1,-1,-1,-1,-1,-1,-1,-1,-1,-1,-1,-1,-1,-1,-1,-1,-1,-1,-1,-1,-1,-1,-1,-1,-1,-1,-1,-1,-1,-1,-1,-1,-1,-1,-1,-1,-1,-1,-1,-1,-1,-1,-1,-1,-1,-1,-1,-1,-1,-1,-1,1,0.723,0.366,0.75,0.736,0.251,0.287,0.529,1,1,1,1,0.958,0.904,1,1,0.359,0.23,0.285,0.452,0.593,0.621,0.939,0.753,0.517,0.907,0.508,0.709,0.987,0.46,0.675,1,0.754,0.529,0.294,0.078,0.245,0.848,0.822,1,0.46,0.362,0.225,0…	0.911131,0.770038,0.931454,0.258675,0.941202,0.642311,0.576855,0.432623,0.953404,0.897055,0.842554,0.603026,0.839691,0.590170,0.997312,0.598885,0.042657,0.067511,0.362188,0.094210,0.914846,0.664601,0.383872,0.859078,0.984238,0.187634,0.848158,0.129880,0.732453,0.740779,0.999284,0.630590,0.401114,0.617016,0.998863,0.191725,0.899359,0.905690,0.112470,0.358377,0.841739,0.904278,0.656257,0.339389,0.7…	101	123	1530	1752	na	na	0	na	na	0.810851	0.1777	1630	1652	465	1853	0	1	0	-1	0.838733	-1	FALSE
all	RUVBL2_A375_gRNA1698	A375	RUVBL2	GTACCCTTGCGTTTCCGGCACAC	GTGTGCCGGAAACGCAAGGGTAC	ENST00000595090	AGATGTGGAGATGAGTGAGGACGCCTACACGGTGCTGACCCGCATCGGGCTGGAGACGTCACTGCGCTACGCCATCCAGCTCATCACAGCTGCCAGCTTGGTGTGCCGGAAACGCAAGGGTACAGAAGTGCAGGTGGATGACATCAAGCGGGTCTACTCACTCTTCCTGGACGAGTCCCGCTCCACGCAGTACATGAAGGAGTACCAGGACGCCTTCCTCTTC	aacccctaccaactggtcggggtttgaaac	-20.5	((((((.(((....))).)))))).((((((((....))))))))........	-39.16	0.958,0.904,1,1,0.359,0.23,0.285,0.452,0.593,0.621,0.939,0.753,0.517,0.907,0.508,0.709,0.987,0.46,0.675,1,0.754,0.529,0.294,0.078,0.245,0.848,0.822,1,0.46,0.362,0.225,0.264,0.411,0.617,0.294,0.617,1,0.529,0.078,0.078,0.157,0.206,0.538,0.656,0.274,0.421,0.176,0.284,0.245,0.254,0.078,0.147,0.294,0.303,0.254,0.166,0.186,0.274,0.254,0.421,0.45,0.235,0.45,0.46,0.333,0.499,0.264,0.803,0.284,0.245,0.147…	0.515847,0.110992,0.461952,0.188399,0.074481,0.195791,0.029361,0.366970,0.704280,0.911766,0.062409,0.304820,0.529854,0.429199,0.960859,0.064974,0.034395,0.107621,0.153406,0.020250,0.556064,0.757304,0.265056,0.603371,0.018537,0.320233,0.025655,0.133280,0.152095,0.288960,0.856474,0.034265,0.099061,0.073427,0.487916,0.010582,0.138049,0.303763,0.143348,0.079253,0.014236,0.913213,0.181698,0.057408,0.2…	101	123	1598	1820	na	na	0	na	na	0.844699	0.143853	1698	1720	465	1853	0	1	0	-1	0.887689	-1	FALSE
all	RUVBL2_A375_gRNA1822	A375	RUVBL2	CATGGTCTCGCCTTTGAGTTCGT	ACGAACTCAAAGGCGAGACCATG	ENST00000595090	GAAGTGCAGGTGGATGACATCAAGCGGGTCTACTCACTCTTCCTGGACGAGTCCCGCTCCACGCAGTACATGAAGGAGTACCAGGACGCCTTCCTCTTCAACGAACTCAAAGGCGAGACCATGGACACCTCCTGAGTTGGATGTCATCCCCCGACCCCACCCTGTTTTCCACCAGAGTTCTGACACTGTGACTCTGTATAAAATGGTTGGGAAGCTGCACCCA	aacccctaccaactggtcggggtttgaaac	-16.1	((((((.(((....))).)))))).(((..((.(((...)))..))..)))..	-36.71	1,1,1,0.804,0.876,0.639,0.732,0.584,0.259,0.464,0.292,0.425,0.876,0.425,0.504,1,0.584,0.836,0.517,0.584,1,1,1,0.119,0.086,0.066,0.179,0.497,0.551,0.716,1,0.756,0.524,0.206,0.345,0.332,0.219,0.159,0.332,0.458,0.464,0.252,0.239,0.172,0.212,0.385,0.292,0.146,0.219,0.325,0.279,0.272,0.093,0.013,0.066,0.093,0.332,0.458,0.206,0.245,0.245,0.292,0.292,0.378,0.769,0.913,1,0.564,0.743,0.61,0.504,0.57,1,0.1…	0.265184,0.244126,0.265463,0.004966,0.303863,0.055130,0.003505,0.037551,0.017364,0.939732,0.320669,0.009028,0.223495,0.590959,0.905711,0.800809,0.243179,0.015250,0.278120,0.021755,0.170317,0.524808,0.139040,0.299591,0.001236,0.385648,0.012800,0.000935,0.011969,0.185563,0.526720,0.000223,0.043724,0.001990,0.104698,0.003993,0.010686,0.007999,0.000135,0.010267,0.003528,0.002781,0.125996,0.027716,0.2…	101	123	1722	1944	na	na	0	na	na	0.906421	0.0821304	1822	1844	465	1853	0	1	0	-1	0.976962	-1	FALSE
all	RPS6_A375_gRNA111	A375	RPS6	CGAAGTTTGCGTTCATCGTCCAC	GTGGACGATGAACGCAAACTTCG	ENST00000380394	AGTTGGCCCTCTTTTCCGTGGCGCCTCGGAGGCGTTCAGCTGCTTCAAGATGAAGCTGAACATCTCCTTCCCAGCCACTGGCTGCCAGAAACTCATTGAAGTGGACGATGAACGCAAACTTCGTACTTTCTATGAGAAGCGTATGGCCACAGAAGTTGCTGCTGACGCTCTGGGTGAAGAATGGAAGGGTTATGTGGTCCGAATCAGTGGTGGGAACGACAAA	aacccctaccaactggtcggggtttgaaac	-13.7	((((((.(((....))).))))))..((((....))))(((.....)))....	-37.83	-1,-1,-1,-1,-1,-1,-1,-1,-1,-1,-1,-1,-1,-1,-1,-1,-1,-1,-1,-1,-1,-1,-1,-1,-1,-1,-1,-1,-1,-1,-1,-1,-1,-1,-1,-1,-1,-1,-1,-1,-1,-1,-1,-1,-1,-1,-1,-1,-1,-1,-1,-1,-1,-1,-1,-1,-1,0.007,0.023,0.002,0.072,0.021,0.008,0.011,0.007,0.005,0.057,0.108,0.039,0.021,0.01,0.041,0.048,0.005,0.005,0.028,0.192,0.144,0.248,0.103,0.138,0.07,0.174,0.254,0.077,0.241,0.298,0.436,1,0.966,0.493,0.102,0.033,0.105,0.077,0.046,…	0.531407,0.781861,0.537996,0.434393,0.916378,0.206100,0.103775,0.154118,0.556200,0.993367,0.334301,0.064443,0.027163,0.694367,0.960883,0.247269,0.220016,0.394357,0.191346,0.019655,0.699345,0.876742,0.185950,0.171005,0.991506,0.837409,0.092088,0.025681,0.302428,0.801307,0.953194,0.004773,0.599212,0.003157,0.852990,0.002542,0.654966,0.547357,0.310017,0.823386,0.027899,0.186544,0.023763,0.201196,0.1…	101	123	11	233	na	na	0	na	na	0.0793079	0.90411	111	133	60	806	0	1	0	-1	0.0682731	-1	FALSE
all	RPS6_A375_gRNA147	A375	RPS6	GCAACTTCTGTGGCCATACGCTT	AAGCGTATGGCCACAGAAGTTGC	ENST00000380394	CAGCTGCTTCAAGATGAAGCTGAACATCTCCTTCCCAGCCACTGGCTGCCAGAAACTCATTGAAGTGGACGATGAACGCAAACTTCGTACTTTCTATGAGAAGCGTATGGCCACAGAAGTTGCTGCTGACGCTCTGGGTGAAGAATGGAAGGGTTATGTGGTCCGAATCAGTGGTGGGAACGACAAACAAGGTTTCCCCATGAAGCAGGGTGTCTTGACCCAT	aacccctaccaactggtcggggtttgaaac	-15.2	((((((.(((....))).)))))).....((((.....))))...........	-38.4	-1,-1,-1,-1,-1,-1,-1,-1,-1,-1,-1,-1,-1,-1,-1,-1,-1,-1,-1,-1,-1,0.007,0.023,0.002,0.072,0.021,0.008,0.011,0.007,0.005,0.057,0.108,0.039,0.021,0.01,0.041,0.048,0.005,0.005,0.028,0.192,0.144,0.248,0.103,0.138,0.07,0.174,0.254,0.077,0.241,0.298,0.436,1,0.966,0.493,0.102,0.033,0.105,0.077,0.046,0.059,0.082,0.069,0.077,1,0.062,0.112,0.228,0.071,0.031,0.117,0.128,0.064,0.271,1,0.534,0.588,0.98,0.836,1,1…	0.760742,0.918322,0.236755,0.731812,0.969908,0.103345,0.206110,0.620559,0.945272,0.978337,0.654925,0.565995,0.182211,0.578317,0.806798,0.067835,0.305466,0.186536,0.380129,0.129482,0.568446,0.767121,0.467070,0.189760,0.931288,0.898265,0.093465,0.722747,0.888241,0.944405,0.988914,0.113674,0.933859,0.023273,0.982491,0.010359,0.764863,0.446181,0.379042,0.970459,0.054506,0.155752,0.014651,0.271976,0.2…	101	123	47	269	na	na	0	na	na	0.105263	0.878154	147	169	60	806	0	1	0	-1	0.116466	-1	FALSE
all	RPS6_A375_gRNA153	A375	RPS6	TCAGCAGCAACTTCTGTGGCCAT	ATGGCCACAGAAGTTGCTGCTGA	ENST00000380394	CTTCAAGATGAAGCTGAACATCTCCTTCCCAGCCACTGGCTGCCAGAAACTCATTGAAGTGGACGATGAACGCAAACTTCGTACTTTCTATGAGAAGCGTATGGCCACAGAAGTTGCTGCTGACGCTCTGGGTGAAGAATGGAAGGGTTATGTGGTCCGAATCAGTGGTGGGAACGACAAACAAGGTTTCCCCATGAAGCAGGGTGTCTTGACCCATGGCCGT	aacccctaccaactggtcggggtttgaaac	-15.4	((((((.(((....))).)))))).........((.(((.....))).))...	-38.3	-1,-1,-1,-1,-1,-1,-1,-1,-1,-1,-1,-1,-1,-1,-1,0.007,0.023,0.002,0.072,0.021,0.008,0.011,0.007,0.005,0.057,0.108,0.039,0.021,0.01,0.041,0.048,0.005,0.005,0.028,0.192,0.144,0.248,0.103,0.138,0.07,0.174,0.254,0.077,0.241,0.298,0.436,1,0.966,0.493,0.102,0.033,0.105,0.077,0.046,0.059,0.082,0.069,0.077,1,0.062,0.112,0.228,0.071,0.031,0.117,0.128,0.064,0.271,1,0.534,0.588,0.98,0.836,1,1,0.693,0.197,0.235…	0.772015,0.966136,0.237159,0.700192,0.915692,0.252767,0.194197,0.633800,0.976122,0.979470,0.488744,0.361717,0.181115,0.874837,0.648112,0.075694,0.217783,0.292979,0.338393,0.152440,0.723433,0.773752,0.472551,0.357902,0.985505,0.843795,0.298761,0.860549,0.803902,0.931136,0.995012,0.209718,0.873887,0.093841,0.986517,0.015967,0.807670,0.380163,0.535637,0.932081,0.215860,0.124140,0.052315,0.179924,0.3…	101	123	53	275	na	na	0	na	na	0.109589	0.873828	153	175	60	806	0	1	0	-1	0.124498	-1	FALSE
all	RPS6_A375_gRNA281	A375	RPS6	AATGCCCCTTACTCAGTAGCAGG	CCTGCTACTGAGTAAGGGGCATT	ENST00000380394	TGGGTGAAGAATGGAAGGGTTATGTGGTCCGAATCAGTGGTGGGAACGACAAACAAGGTTTCCCCATGAAGCAGGGTGTCTTGACCCATGGCCGTGTCCGCCTGCTACTGAGTAAGGGGCATTCCTGTTACAGACCAAGGAGAACTGGAGAAAGAAAGAGAAAATCAGTTCGTGGTTGCATTGTGGATGCAAATCTGAGCGTTCTCAACTTGGTTATTGTAAA	aacccctaccaactggtcggggtttgaaac	-14.1	((((((.(((....))).))))))........(((..((.....))..)))..	-37.43	0.105,0.041,0.105,0.145,0.19,0.477,1,0.755,0.561,1,0.891,0.465,0.662,1,0.618,0.241,0,0.342,0.325,0.518,0.877,0.985,1,0.644,0.348,0.387,0.62,0.249,0.145,0.259,0.625,0.993,1,0.56,0.609,0.796,0.436,0.188,0.193,0.206,0.596,0.046,0.053,0.169,0.294,0.25,0.287,0.4,0.269,0.647,1,1,1,0.574,0.981,0.396,0.861,0.149,0.202,0.467,0.165,0.087,0.042,0.04,0.166,0.231,0.287,0.463,1,0.97,0.407,0.584,0.416,0.153,0.4…	0.676666,0.713605,0.759909,0.680677,0.566624,0.872456,0.278399,0.008661,0.930409,0.930729,0.898550,0.940291,0.267199,0.970874,0.967127,0.026659,0.240577,0.242052,0.209545,0.432290,0.647987,0.573743,0.197235,0.940403,0.998328,0.112540,0.126653,0.208991,0.486096,0.096525,0.844278,0.806622,0.752334,0.196518,0.957201,0.245655,0.961021,0.941911,0.712207,0.429686,0.762237,0.052241,0.028778,0.801775,0.9…	101	123	181	403	na	na	0	na	na	0.201875	0.781543	281	303	60	806	0	1	0	-1	0.29585	-1	FALSE
all	RPS6_A375_gRNA442	A375	RPS6	GGGGCCCAGGCGGCGAGGCACTG	CAGTGCCTCGCCGCCTGGGCCCC	ENST00000380394	AAATCAGTTCGTGGTTGCATTGTGGATGCAAATCTGAGCGTTCTCAACTTGGTTATTGTAAAAAAAGGAGAGAAGGATATTCCTGGACTGACTGATACTACAGTGCCTCGCCGCCTGGGCCCCAAAAGAGCTAGCAGAATCCGCAAACTTTTCAATCTCTCTAAAGAAGATGATGTCCGCCAGTATGTTGTAAGAAAGCCCTTAAATAAAGAAGGTAAGAAAC	aacccctaccaactggtcggggtttgaaac	-19.4	((((((.(((....))).)))))).....(((.(((..(....)..))).)))	-46.83	0.382,0.662,0.249,0.182,0.211,0.866,0.364,0.544,0.314,0.387,0.335,0.267,0.313,0.43,0.273,0.197,0.039,0.101,0.116,0.154,0.559,1,0.701,1,1,0.291,0.218,0.098,0.228,0.622,0.982,1,0.524,0.925,0.875,1,1,0.982,0.918,0.017,0.023,0.017,0.017,0.006,0.092,0.799,0.519,0.07,0.014,0.01,0.034,0.054,0.057,0.223,0.954,0.327,0.239,0.087,0.202,0.2,0.242,0.499,0.949,0.433,0.396,0.174,0,-1,-1,-1,0.601,0.58,0.903,0.32…	0.659603,0.733937,0.337011,0.443074,0.683497,0.781008,0.015466,0.154239,0.658139,0.961760,0.882105,0.398500,0.976853,0.979495,0.815208,0.505356,0.400138,0.772138,0.435599,0.309124,0.616770,0.542550,0.326554,0.500821,0.809925,0.733896,0.519894,0.142146,0.898268,0.075816,0.999527,0.785649,0.943830,0.040186,0.905154,0.040122,0.222197,0.933205,0.117743,0.020229,0.304583,0.063793,0.037848,0.939812,0.4…	101	123	342	564	na	na	0	na	na	0.317952	0.665465	442	464	60	806	0	1	0	-1	0.511379	-1	FALSE
all	RPS6_A375_gRNA469	A375	RPS6	AAGTTTGCGGATTCTGCTAGCTC	GAGCTAGCAGAATCCGCAAACTT	ENST00000380394	GCAAATCTGAGCGTTCTCAACTTGGTTATTGTAAAAAAAGGAGAGAAGGATATTCCTGGACTGACTGATACTACAGTGCCTCGCCGCCTGGGCCCCAAAAGAGCTAGCAGAATCCGCAAACTTTTCAATCTCTCTAAAGAAGATGATGTCCGCCAGTATGTTGTAAGAAAGCCCTTAAATAAAGAAGGTAAGAAACCTAGGACCAAAGCACCCAAGATTCAGC	aacccctaccaactggtcggggtttgaaac	-18.5	((((((.(((....))).)))))).......((((.((((...)))).)))).	-34.23	0.098,0.228,0.622,0.982,1,0.524,0.925,0.875,1,1,0.982,0.918,0.017,0.023,0.017,0.017,0.006,0.092,0.799,0.519,0.07,0.014,0.01,0.034,0.054,0.057,0.223,0.954,0.327,0.239,0.087,0.202,0.2,0.242,0.499,0.949,0.433,0.396,0.174,0,-1,-1,-1,0.601,0.58,0.903,0.322,0.291,0.513,0.837,0.726,1,1,0.527,0.254,0.276,0.343,0.392,0.612,0.635,0.204,0.699,0.43,0.64,0.271,0.391,0.916,1,1,0.884,0.497,1,0.704,0.54,0.686,0.…	0.409041,0.791227,0.815340,0.380137,0.970367,0.675300,0.001555,0.101805,0.952690,0.751809,0.820099,0.019688,0.976640,0.979589,0.958251,0.414504,0.714681,0.678030,0.419580,0.186337,0.688626,0.852624,0.195061,0.671988,0.976204,0.636597,0.322198,0.172682,0.765676,0.350878,0.999893,0.800209,0.840839,0.026999,0.907066,0.024169,0.214870,0.955681,0.058053,0.038753,0.014403,0.122557,0.612117,0.619260,0.7…	101	123	369	591	na	na	0	na	na	0.337419	0.645999	469	491	60	806	0	1	0	-1	0.547523	-1	FALSE
all	RPL17_A375_gRNA132	A375	RPL17	GTGAACACGAAGATTGGAACCTC	GAGGTTCCAATCTTCGTGTTCAC	ENST00000580261	TCCACCGCTCTTCCTCTTTCCCTAAGCAGCCTGAGGTGATCTGTGAAAATGGTTCGCTATTCACTTGACCCGGAGAACCCCACGAAATCATGCAAATCAAGAGGTTCCAATCTTCGTGTTCACTTTAAGAACACTCGTGAAACTGCTCAGGCCATCAAGGGTATGCATATACGAAAAGCCACGAAGTATCTGAAAGATGTCACTTTACAGAAACAGTGTGTAC	aacccctaccaactggtcggggtttgaaac	-13.2	((((((.(((....))).)))))).....(((....)))..............	-38.04	-1,-1,-1,-1,-1,-1,-1,-1,-1,-1,-1,-1,-1,0.228,0.106,0.946,1,1,1,0.408,0.215,0.348,1,1,1,1,1,1,0.524,0.021,0.021,0,0.021,0,0.023,1,1,0.988,0.979,0.694,0.347,0.923,0.889,0.776,0.344,0.197,0.344,0.246,0.244,0,0.244,0.342,0.098,0.048,0.145,0.194,0.097,0.291,0.43,0.239,0.382,0.239,0.048,0.424,0.141,0.188,0.911,0.659,0.046,0,0.185,0.37,0.741,1,0.641,0.595,0.229,0.183,0.045,0.136,0.914,0.543,0.226,0.899,…	0.802287,0.645350,0.748134,0.284267,0.559440,0.147745,0.362370,0.092683,0.865910,0.992581,0.082917,0.707051,0.290970,0.851277,0.619847,0.208947,0.046346,0.352867,0.347468,0.267245,0.664913,0.914427,0.177654,0.794912,0.454993,0.943470,0.477207,0.889978,0.915076,0.273650,0.709419,0.159153,0.210494,0.135584,0.850242,0.023253,0.174116,0.628616,0.101932,0.723614,0.367502,0.376636,0.088112,0.503871,0.1…	101	123	32	254	na	na	0	na	na	0.195815	0.769806	132	154	80	631	0	1	0	-1	0.0942029	-1	FALSE
all	RPL17_A375_gRNA133	A375	RPL17	AGTGAACACGAAGATTGGAACCT	AGGTTCCAATCTTCGTGTTCACT	ENST00000580261	CCACCGCTCTTCCTCTTTCCCTAAGCAGCCTGAGGTGATCTGTGAAAATGGTTCGCTATTCACTTGACCCGGAGAACCCCACGAAATCATGCAAATCAAGAGGTTCCAATCTTCGTGTTCACTTTAAGAACACTCGTGAAACTGCTCAGGCCATCAAGGGTATGCATATACGAAAAGCCACGAAGTATCTGAAAGATGTCACTTTACAGAAACAGTGTGTACC	aacccctaccaactggtcggggtttgaaac	-13.5	((((((.(((....))).)))))).....((((..........))))......	-38.9	-1,-1,-1,-1,-1,-1,-1,-1,-1,-1,-1,-1,0.228,0.106,0.946,1,1,1,0.408,0.215,0.348,1,1,1,1,1,1,0.524,0.021,0.021,0,0.021,0,0.023,1,1,0.988,0.979,0.694,0.347,0.923,0.889,0.776,0.344,0.197,0.344,0.246,0.244,0,0.244,0.342,0.098,0.048,0.145,0.194,0.097,0.291,0.43,0.239,0.382,0.239,0.048,0.424,0.141,0.188,0.911,0.659,0.046,0,0.185,0.37,0.741,1,0.641,0.595,0.229,0.183,0.045,0.136,0.914,0.543,0.226,0.899,1,0…	0.747993,0.667251,0.763799,0.192980,0.588366,0.142499,0.383864,0.115456,0.814787,0.991114,0.084685,0.735298,0.350424,0.907449,0.663340,0.083449,0.049047,0.410731,0.257909,0.287591,0.641371,0.917785,0.181449,0.804752,0.548478,0.943630,0.490523,0.879416,0.936312,0.320995,0.646517,0.157633,0.119686,0.187943,0.905292,0.017476,0.166879,0.735068,0.176539,0.661673,0.312493,0.624713,0.110851,0.553905,0.1…	101	123	33	255	na	na	0	na	na	0.197309	0.768311	133	155	80	631	0	1	0	-1	0.0960145	-1	FALSE
all	RPL17_A375_gRNA243	A375	RPL17	ACGTCGGAATGGTACACACTGTT	AACAGTGTGTACCATTCCGACGT	ENST00000580261	CTTCGTGTTCACTTTAAGAACACTCGTGAAACTGCTCAGGCCATCAAGGGTATGCATATACGAAAAGCCACGAAGTATCTGAAAGATGTCACTTTACAGAAACAGTGTGTACCATTCCGACGTTACAATGGTGGAGTTGGCAGGTGTGCGCAGGCCAAGCAATGGGGCTGGACACAAGGTCGGTGGCCCAAAAAGAGTGCTGAATTTTTGCTGCACATGCTTA	aacccctaccaactggtcggggtttgaaac	-13.7	((((((.(((....))).)))))).............((((((....))))))	-38.96	-1,-1,-1,-1,-1,-1,-1,-1,-1,-1,-1,-1,-1,-1,-1,-1,-1,-1,-1,-1,-1,-1,-1,0.044,0,0,0,0,0,0,0,0,0,0,0,0,0,0,0,0,0,0,0,0,0,0,0,0,0,0,0,0,0.043,0,0,0,0.043,0,0,0,0.043,0,0.129,0.043,0.043,0,0,0,0,0,-1,-1,-1,-1,-1,-1,-1,-1,-1,-1,-1,-1,-1,-1,-1,-1,-1,-1,-1,-1,-1,-1,-1,-1,-1,-1,0.129,0.043,0.258,0.388,0.345,0.431,0.345,0.388,0.086,0.258,0.345,0.621,0.692,0.586,0.586,0.043,0.302,0.258,0.431,0.302,0.172,0.38…	0.820279,0.736259,0.922350,0.591494,0.739478,0.577745,0.404444,0.854281,0.955078,0.964512,0.904294,0.950149,0.352830,0.995124,0.992570,0.218542,0.517126,0.310702,0.784590,0.926747,0.704283,0.551566,0.833776,0.940631,0.990311,0.914716,0.937975,0.961855,0.980385,0.494622,0.999574,0.901928,0.894488,0.173451,0.851968,0.340042,0.926924,0.867118,0.087242,0.830766,0.742739,0.900646,0.074230,0.587514,0.9…	101	123	143	365	na	na	0	na	na	0.361734	0.603886	243	265	80	631	0	1	0	-1	0.29529	-1	FALSE
all	RPL17_A375_gRNA246	A375	RPL17	GTAACGTCGGAATGGTACACACT	AGTGTGTACCATTCCGACGTTAC	ENST00000580261	CGTGTTCACTTTAAGAACACTCGTGAAACTGCTCAGGCCATCAAGGGTATGCATATACGAAAAGCCACGAAGTATCTGAAAGATGTCACTTTACAGAAACAGTGTGTACCATTCCGACGTTACAATGGTGGAGTTGGCAGGTGTGCGCAGGCCAAGCAATGGGGCTGGACACAAGGTCGGTGGCCCAAAAAGAGTGCTGAATTTTTGCTGCACATGCTTAAAA	aacccctaccaactggtcggggtttgaaac	-14	((((((.(((....))).))))))......(((.(((....))).))).....	-38.29	-1,-1,-1,-1,-1,-1,-1,-1,-1,-1,-1,-1,-1,-1,-1,-1,-1,-1,-1,-1,0.044,0,0,0,0,0,0,0,0,0,0,0,0,0,0,0,0,0,0,0,0,0,0,0,0,0,0,0,0,0.043,0,0,0,0.043,0,0,0,0.043,0,0.129,0.043,0.043,0,0,0,0,0,-1,-1,-1,-1,-1,-1,-1,-1,-1,-1,-1,-1,-1,-1,-1,-1,-1,-1,-1,-1,-1,-1,-1,-1,-1,-1,0.129,0.043,0.258,0.388,0.345,0.431,0.345,0.388,0.086,0.258,0.345,0.621,0.692,0.586,0.586,0.043,0.302,0.258,0.431,0.302,0.172,0.388,0.799,0…	0.911211,0.871076,0.916963,0.550251,0.660552,0.564130,0.419582,0.895830,0.978075,0.968318,0.920150,0.958695,0.604346,0.996406,0.990590,0.224501,0.569809,0.365421,0.675449,0.873686,0.767224,0.580414,0.850464,0.951540,0.994302,0.934340,0.968229,0.934812,0.988140,0.648482,0.999744,0.969156,0.961982,0.206000,0.976609,0.559986,0.955830,0.908712,0.091345,0.829339,0.889041,0.926626,0.159048,0.857990,0.9…	101	123	146	368	na	na	0	na	na	0.366218	0.599402	246	268	80	631	0	1	0	-1	0.300725	-1	FALSE
all	RPL17_A375_gRNA247	A375	RPL17	TGTAACGTCGGAATGGTACACAC	GTGTGTACCATTCCGACGTTACA	ENST00000580261	GTGTTCACTTTAAGAACACTCGTGAAACTGCTCAGGCCATCAAGGGTATGCATATACGAAAAGCCACGAAGTATCTGAAAGATGTCACTTTACAGAAACAGTGTGTACCATTCCGACGTTACAATGGTGGAGTTGGCAGGTGTGCGCAGGCCAAGCAATGGGGCTGGACACAAGGTCGGTGGCCCAAAAAGAGTGCTGAATTTTTGCTGCACATGCTTAAAAA	aacccctaccaactggtcggggtttgaaac	-14.8	((((((.(((....))).))))))......((((.(((....))).))))...	-37.14	-1,-1,-1,-1,-1,-1,-1,-1,-1,-1,-1,-1,-1,-1,-1,-1,-1,-1,-1,0.044,0,0,0,0,0,0,0,0,0,0,0,0,0,0,0,0,0,0,0,0,0,0,0,0,0,0,0,0,0.043,0,0,0,0.043,0,0,0,0.043,0,0.129,0.043,0.043,0,0,0,0,0,-1,-1,-1,-1,-1,-1,-1,-1,-1,-1,-1,-1,-1,-1,-1,-1,-1,-1,-1,-1,-1,-1,-1,-1,-1,-1,0.129,0.043,0.258,0.388,0.345,0.431,0.345,0.388,0.086,0.258,0.345,0.621,0.692,0.586,0.586,0.043,0.302,0.258,0.431,0.302,0.172,0.388,0.799,0.50…	0.922804,0.851701,0.946895,0.647899,0.688759,0.575295,0.471616,0.907635,0.984709,0.970031,0.918602,0.970068,0.606957,0.994603,0.990952,0.249992,0.554251,0.368673,0.761429,0.914357,0.788025,0.631821,0.845194,0.955449,0.993256,0.946718,0.976016,0.888183,0.992232,0.700647,0.999747,0.974176,0.966937,0.243710,0.986734,0.672367,0.966016,0.953570,0.107698,0.879281,0.955378,0.939941,0.263318,0.907333,0.9…	101	123	147	369	na	na	0	na	na	0.367713	0.597907	247	269	80	631	0	1	0	-1	0.302536	-1	FALSE
all	RPL17_A375_gRNA270	A375	RPL17	CGCACACCTGCCAACTCCACCAT	ATGGTGGAGTTGGCAGGTGTGCG	ENST00000580261	GAAACTGCTCAGGCCATCAAGGGTATGCATATACGAAAAGCCACGAAGTATCTGAAAGATGTCACTTTACAGAAACAGTGTGTACCATTCCGACGTTACAATGGTGGAGTTGGCAGGTGTGCGCAGGCCAAGCAATGGGGCTGGACACAAGGTCGGTGGCCCAAAAAGAGTGCTGAATTTTTGCTGCACATGCTTAAAAACGCAGAGAGTAATGCTGAACTTA	aacccctaccaactggtcggggtttgaaac	-14	((((((.(((....))).)))))).......(((....)))............	-43.65	0,0,0,0,0,0,0,0,0,0,0,0,0,0,0,0,0,0,0,0,0,0,0,0,0,0.043,0,0,0,0.043,0,0,0,0.043,0,0.129,0.043,0.043,0,0,0,0,0,-1,-1,-1,-1,-1,-1,-1,-1,-1,-1,-1,-1,-1,-1,-1,-1,-1,-1,-1,-1,-1,-1,-1,-1,-1,-1,0.129,0.043,0.258,0.388,0.345,0.431,0.345,0.388,0.086,0.258,0.345,0.621,0.692,0.586,0.586,0.043,0.302,0.258,0.431,0.302,0.172,0.388,0.799,0.508,0.508,0.799,1,1,1,0.825,1,1,0.663,1,1,0.78,1,1,1,1,0.962,0.192,0.34…	0.982673,0.977793,0.950589,0.772065,0.849944,0.621059,0.833676,0.944805,0.996014,0.980988,0.936816,0.994144,0.918492,0.976191,0.991998,0.374086,0.680803,0.286056,0.929570,0.961438,0.896314,0.754262,0.913639,0.933215,0.997817,0.986271,0.997720,0.459590,0.996482,0.851609,0.999818,0.993218,0.983750,0.812081,0.998604,0.796006,0.981387,0.987953,0.210073,0.945354,0.986260,0.977132,0.595685,0.985816,0.9…	101	123	170	392	na	na	0	na	na	0.402093	0.563528	270	292	80	631	0	1	0	-1	0.344203	-1	FALSE
all	HAUS7_A375_gRNA245	A375	HAUS7	GGTACTCTGAGGGGCTGCACAGC	GCTGTGCAGCCCCTCAGAGTACC	ENST00000370211	TGTCCAGGGCGGCTGTGGAGGTGTTCGGGAAGCTGAAGGACCTAAACTGCCCCTTCCTCGAGGGTCTGTATATCACAGAGCCAAAGACAATTCAGGAACTGCTGTGCAGCCCCTCAGAGTACCGCTTGGAGATCCTAGAGTGGATGTGTACCCGGGTCTGGCCCTCACTGCAGGACAGGTTCAGCTCACTGAAAGGGGTCCCAACAGAGGTGAAGATCCAAGA	aacccctaccaactggtcggggtttgaaac	-15.8	((((((.(((....))).)))))).....((((.(((...)))))))......	-44.66	1,0.571,0.857,0.571,1,0.143,0.143,0.571,0.286,0,0.286,0,0.429,0.143,0.286,0.143,0.429,0.857,0.286,0,0,0.571,0.286,0.143,0.286,0,0.143,0.143,0.571,1,0.857,0.286,0.143,0.286,1,0.143,0,0,0.968,0.484,0.097,0,0.776,0.97,0.194,0.195,0.098,0.39,0,0,0,0.196,0.196,0.687,0.098,0.098,0.098,0.098,0.098,0.393,0,0,0.098,0.098,0,0,0.098,0,0,0.196,0.196,0.972,0.098,0.295,0,0,0,0.295,0.196,0,0,0.098,0,-1,0.295,0.…	0.355079,0.376601,0.430853,0.152148,0.248146,0.219700,0.088744,0.213053,0.003040,0.924777,0.549460,0.000193,0.552234,0.984501,0.995685,0.061634,0.004318,0.029130,0.695660,0.200002,0.577237,0.629832,0.364999,0.625577,0.107807,0.343424,0.471410,0.049644,0.389449,0.614038,0.173614,0.001557,0.023299,0.033550,0.236443,0.019679,0.017967,0.001033,0.003899,0.025915,0.018257,0.338688,0.005924,0.000284,0.7…	101	123	145	367	na	na	0	na	na	0.179017	0.804109	245	267	45	1148	0	1	0	-1	0.181159	-1	FALSE
all	HAUS7_A375_gRNA259	A375	HAUS7	TAGGATCTCCAAGCGGTACTCTG	CAGAGTACCGCTTGGAGATCCTA	ENST00000370211	GTGGAGGTGTTCGGGAAGCTGAAGGACCTAAACTGCCCCTTCCTCGAGGGTCTGTATATCACAGAGCCAAAGACAATTCAGGAACTGCTGTGCAGCCCCTCAGAGTACCGCTTGGAGATCCTAGAGTGGATGTGTACCCGGGTCTGGCCCTCACTGCAGGACAGGTTCAGCTCACTGAAAGGGGTCCCAACAGAGGTGAAGATCCAAGAAATGACGAAGCTGG	aacccctaccaactggtcggggtttgaaac	-14.4	((((((.(((....))).))))))........(((...((....))...))).	-40.42	0.286,0.143,0.429,0.857,0.286,0,0,0.571,0.286,0.143,0.286,0,0.143,0.143,0.571,1,0.857,0.286,0.143,0.286,1,0.143,0,0,0.968,0.484,0.097,0,0.776,0.97,0.194,0.195,0.098,0.39,0,0,0,0.196,0.196,0.687,0.098,0.098,0.098,0.098,0.098,0.393,0,0,0.098,0.098,0,0,0.098,0,0,0.196,0.196,0.972,0.098,0.295,0,0,0,0.295,0.196,0,0,0.098,0,-1,0.295,0.884,1,0.295,0.687,0.687,0.972,0.098,0.589,0.491,0.196,0.393,0.589,0.…	0.307644,0.758372,0.809194,0.140170,0.566676,0.346393,0.286710,0.173505,0.034239,0.995139,0.756458,0.004528,0.856507,0.994715,0.996271,0.148178,0.046957,0.063333,0.906693,0.512815,0.774245,0.698308,0.442269,0.570890,0.014753,0.091261,0.861682,0.030670,0.659869,0.815395,0.164832,0.004413,0.166244,0.115623,0.687151,0.080054,0.013640,0.002881,0.010901,0.057247,0.004223,0.706017,0.117855,0.000802,0.7…	101	123	159	381	na	na	0	na	na	0.189288	0.793837	259	281	45	1148	0	1	0	-1	0.193841	-1	FALSE
all	HAUS7_A375_gRNA392	A375	HAUS7	GGTCATCTGGCGCACACAGCATC	GATGCTGTGTGCGCCAGATGACC	ENST00000370211	GTACCCGGGTCTGGCCCTCACTGCAGGACAGGTTCAGCTCACTGAAAGGGGTCCCAACAGAGGTGAAGATCCAAGAAATGACGAAGCTGGGCCACGAGCTGATGCTGTGTGCGCCAGATGACCAGGAGCTCCTCAAGGGCTGTGCCTGCGCCCAGAAGCAGCTACACTTCATGGACCAGTTGCTCGATACCATCCGGAGCCTGACCATTGGGTGCTCCAGTTG	aacccctaccaactggtcggggtttgaaac	-15	((((((.(((....))).)))))).......(((....)))((.....))...	-42.81	1,0.89,0.791,0.298,0.099,0,0,-1,-1,-1,-1,-1,-1,-1,-1,-1,-1,-1,-1,-1,-1,-1,-1,-1,-1,-1,-1,-1,-1,-1,-1,-1,-1,-1,-1,-1,-1,-1,-1,-1,-1,-1,-1,-1,-1,-1,-1,-1,-1,-1,-1,-1,-1,-1,-1,-1,-1,-1,-1,-1,-1,-1,-1,-1,-1,-1,-1,-1,-1,-1,-1,-1,-1,-1,-1,-1,-1,-1,-1,-1,-1,-1,-1,-1,-1,-1,-1,-1,-1,-1,-1,-1,-1,-1,-1,-1,-1,-1,-1,-1,-1,-1,-1,-1,-1,-1,-1,-1,-1,-1,-1,-1,-1,-1,-1,-1,-1,-1,-1,-1,-1,-1,-1,-1,-1,-1,-1,-1,-1,-1,-…	0.483178,0.500828,0.745477,0.305473,0.410205,0.297439,0.784812,0.752451,0.887064,0.736261,0.026895,0.864043,0.188614,0.908989,0.488807,0.000332,0.030508,0.569746,0.726718,0.756442,0.819843,0.882901,0.386325,0.835321,0.555943,0.144712,0.086383,0.167487,0.667142,0.529161,0.146794,0.334312,0.496460,0.434365,0.900006,0.066357,0.216314,0.359815,0.798465,0.000142,0.579534,0.177469,0.437656,0.245311,0.5…	101	123	292	514	na	na	0	na	na	0.286867	0.696258	392	414	45	1148	0	1	0	-1	0.314312	-1	FALSE
all	HAUS7_A375_gRNA904	A375	HAUS7	GCAGCACTCGCCCAGCTCGTCGT	ACGACGAGCTGGGCGAGTGCTGC	ENST00000370211	GCTGCTGCGGGCGCAGCCGACATCAGCACCCTAGACCAGAAGCTGCGTCTGGTCACTTCCGACTTCCACCAGCTAATCTTGGCTTTTCTCCAAGTCTACGACGACGAGCTGGGCGAGTGCTGCCAGCGCCCAGGCCCTGACCTCCACCCGTGCGGCCCCATCATCCAGGCCACGCACCAGAATCTGACTTCCTACAGCCAACTGCTGCAAGTGGTCATGGCAG	aacccctaccaactggtcggggtttgaaac	-16.8	((((((.(((....))).))))))....(((.(((.........))))))...	-46.2	0.057,0,0.172,0.115,0.057,0.346,0.115,0.115,0.058,0.231,0.174,0.406,0.116,0.406,0.406,0.292,0.058,0.175,0.817,0.759,0.411,0.235,0.117,0.587,0.704,0.236,0.53,1,0.118,0,0.296,1,0.968,0.828,0.296,0.06,0,0.298,0.536,0.238,0.539,0.359,0.3,0.479,0.18,0.181,0.181,0.301,0.06,0,0.121,0.485,0.061,0.363,0.485,0.122,0.426,0.426,0,0.426,0.795,0.906,0.55,1,0.795,0.369,1,0.616,0.123,0.86,0.311,0.311,0.311,1,0.9…	0.005374,0.205238,0.681872,0.002851,0.552937,0.695379,0.031851,0.080585,0.072710,0.318358,0.826867,0.034482,0.019076,0.026563,0.131148,0.009201,0.013324,0.020244,0.347631,0.017739,0.166175,0.540680,0.013016,0.331629,0.000093,0.000858,0.327789,0.000012,0.032826,0.023204,0.108898,0.035614,0.363845,0.194263,0.034117,0.051740,0.053054,0.082815,0.020800,0.132875,0.251361,0.026238,0.001515,0.005270,0.5…	101	123	804	1026	na	na	0	na	na	0.662509	0.320616	904	926	45	1148	0	1	0	-1	0.77808	-1	FALSE
all	HAUS7_A375_gRNA1029	A375	HAUS7	ACGGCCTTCGCAGAGGTGTCAGC	GCTGACACCTCTGCGAAGGCCGT	ENST00000370211	GCGCCCAGGCCCTGACCTCCACCCGTGCGGCCCCATCATCCAGGCCACGCACCAGAATCTGACTTCCTACAGCCAACTGCTGCAAGTGGTCATGGCAGTTGCTGACACCTCTGCGAAGGCCGTGGAGACCGTGAAGAAGCAGCAAGGCGAGCAGATCTGCTGGGGTGGCAGCAGCTCCGTCATGAGTCTAGCTACCAAGATGAATGAACTAATGGAGAAATAG	aacccctaccaactggtcggggtttgaaac	-17.5	((((((.(((....))).))))))........(((((((...)))).)))...	-41.94	0,0.275,0.137,0,0,0.276,0,0.276,0.414,0,0.069,0.278,0.139,0.486,0.208,0.14,0.21,0.349,0.07,0.629,0.352,0.141,0.07,0.281,0.352,0.212,0.142,0,0.142,0,0.143,0.071,0.143,0.357,0.357,0.072,0.288,0.144,0.216,0,0.58,0.145,0.073,0,0,0.658,0.366,0.439,0.146,0.146,0,0,0.148,0.369,0.222,0.955,0.672,0,0.224,0.522,0.302,0.528,0.377,0.302,0.377,0.382,0.153,0.382,0.229,0.881,0.618,0.154,0.077,0.618,0.618,0,0.09…	0.331572,0.259135,0.301192,0.380736,0.027284,0.590643,0.123611,0.031752,0.011455,0.849507,0.036920,0.145343,0.883773,0.914121,0.846756,0.044436,0.007734,0.043205,0.063940,0.011598,0.175953,0.239247,0.120357,0.547305,0.592148,0.116317,0.201117,0.163863,0.284300,0.254965,0.644689,0.025002,0.061936,0.243189,0.380283,0.135836,0.003857,0.001920,0.051100,0.205004,0.001268,0.147799,0.055762,0.003157,0.7…	101	123	929	1151	na	na	0	na	na	0.754219	0.228907	1029	1051	45	1148	0	1	0	-1	0.891304	-1	FALSE
all	HAUS7_A375_gRNA1057	A375	HAUS7	CTCGCCTTGCTGCTTCTTCACGG	CCGTGAAGAAGCAGCAAGGCGAG	ENST00000370211	GGCCCCATCATCCAGGCCACGCACCAGAATCTGACTTCCTACAGCCAACTGCTGCAAGTGGTCATGGCAGTTGCTGACACCTCTGCGAAGGCCGTGGAGACCGTGAAGAAGCAGCAAGGCGAGCAGATCTGCTGGGGTGGCAGCAGCTCCGTCATGAGTCTAGCTACCAAGATGAATGAACTAATGGAGAAATAGAAAGTCTTCAGTGATGGCCTACGCCAAA	aacccctaccaactggtcggggtttgaaac	-13	((((((.(((....))).)))))).........((......))..........	-43.99	0.142,0,0.143,0.071,0.143,0.357,0.357,0.072,0.288,0.144,0.216,0,0.58,0.145,0.073,0,0,0.658,0.366,0.439,0.146,0.146,0,0,0.148,0.369,0.222,0.955,0.672,0,0.224,0.522,0.302,0.528,0.377,0.302,0.377,0.382,0.153,0.382,0.229,0.881,0.618,0.154,0.077,0.618,0.618,0,0.093,0.278,0.093,0.186,0.372,0.931,0.931,1,1,0.747,0.467,1,0.843,0.187,0.749,0.375,0.187,0.281,0.094,0.187,0.094,0.375,0,0.094,0.187,0.281,0.18…	0.506332,0.536826,0.251701,0.059383,0.012606,0.436976,0.159797,0.025789,0.003226,0.893657,0.153014,0.078618,0.961309,0.452861,0.674652,0.161388,0.004337,0.010529,0.241328,0.114075,0.199045,0.252683,0.042353,0.352755,0.879549,0.119805,0.561940,0.001319,0.722367,0.514216,0.702754,0.509747,0.189810,0.329010,0.101475,0.227191,0.003138,0.043222,0.195740,0.425148,0.005820,0.265411,0.161787,0.002600,0.6…	101	123	957	1179	na	na	0	na	na	0.774762	0.208364	1057	1079	45	1148	0	1	0	-1	0.916667	-1	FALSE
all	RRM1_A375_gRNA397	A375	RRM1	GGGTGCTTAGTAGTCAAGGTTGC	GCAACCTTGACTACTAAGCACCC	ENST00000300738	GGATTTTGTTGATCCTGCTCAGATCACCATGAAAGTAATCCAAGGCTTGTACAGTGGGGTCACCACAGTGGAACTAGATACTTTGGCTGCTGAAACAGCTGCAACCTTGACTACTAAGCACCCTGACTATGCTATCCTGGCAGCCAGGATCGCTGTCTCTAACTTGCACAAAGAAACAAAGAAAGTGTTCAGTGATGTGATGGAAGACCTCTATAACTACATA	aacccctaccaactggtcggggtttgaaac	-14.6	((((((.(((....))).))))))......((.(((...))).))........	-41.01	-1,-1,-1,-1,-1,-1,-1,-1,-1,-1,-1,-1,-1,-1,-1,-1,0,0.111,0.111,0.333,0,0.222,-1,-1,-1,-1,-1,-1,-1,-1,-1,-1,-1,0.778,0.667,0.667,1,0.556,0.667,0.333,0.111,0.111,0.333,0.111,0.222,0,0.111,0,0.333,0.667,0.333,0.333,1,0,0.111,0.111,0.111,0.444,0.222,0.333,0.333,0.333,0,0.222,0.333,0.556,0.778,0.889,0.333,0.222,1,1,0.333,0.333,1,0.778,1,0.556,0.889,0.778,0.889,0.444,0.333,0,0.333,0,0.111,0,0.111,0,0.22…	0.014057,0.210017,0.021366,0.012335,0.663106,0.386713,0.012975,0.038866,0.082373,0.655894,0.309217,0.002068,0.084234,0.564882,0.344357,0.069501,0.014813,0.077957,0.050580,0.058660,0.803556,0.252516,0.250183,0.938745,0.447522,0.172198,0.274576,0.003772,0.742941,0.776490,0.072964,0.109954,0.768448,0.008229,0.704056,0.011292,0.014556,0.120026,0.056651,0.170681,0.000573,0.015129,0.443718,0.007077,0.5…	101	123	297	519	na	na	0	na	na	0.128739	0.863784	397	419	205	2580	0	1	0	-1	0.0808081	-1	FALSE
all	RRM1_A375_gRNA1227	A375	RRM1	ACCAGTCCTGATTAGTCTCCACT	AGTGGAGACTAATCAGGACTGGT	ENST00000300738	TCTTTGAATTCCTTGATTTAAAGAAGAACACAGGAAAGGAAGAGCAGCGTGCCAGAGATCTTTTCTTTGCTCTTTGGATTCCGGATCTCTTCATGAAACGAGTGGAGACTAATCAGGACTGGTCTTTGATGTGTCCAAATGAGTGTCCTGGTCTGGATGAGGTTTGGGGAGAGGAATTTGAGAAACTATATGCAAGTTATGAGAAACAAGGTCGTGTCCGCAA	aacccctaccaactggtcggggtttgaaac	-13.2	...........((((((((((..(((......))).)))))))))).......	-41.38	-1,-1,-1,-1,-1,-1,-1,-1,-1,-1,-1,-1,-1,-1,-1,-1,-1,-1,-1,-1,-1,-1,-1,-1,-1,-1,-1,-1,-1,-1,-1,-1,-1,-1,-1,-1,-1,-1,-1,-1,-1,-1,-1,-1,-1,-1,-1,-1,-1,-1,-1,-1,-1,-1,-1,-1,-1,-1,-1,-1,-1,-1,-1,-1,-1,-1,-1,-1,-1,-1,-1,-1,-1,-1,-1,-1,-1,-1,-1,-1,-1,-1,-1,-1,-1,-1,-1,-1,-1,-1,-1,-1,-1,-1,-1,-1,-1,-1,-1,-1,-1,-1,-1,-1,-1,-1,-1,-1,-1,-1,-1,-1,-1,-1,-1,-1,-1,-1,-1,-1,-1,-1,-1,-1,-1,-1,-1,-1,-1,-1,-1,-1,-1,…	0.873046,0.516765,0.573030,0.306446,0.592163,0.423215,0.473685,0.817665,0.951890,0.744663,0.210489,0.866143,0.028597,0.819468,0.203195,0.000656,0.270408,0.617952,0.777612,0.873321,0.866336,0.990096,0.686016,0.951225,0.742838,0.461566,0.228520,0.880476,0.879162,0.300474,0.105739,0.441026,0.901335,0.301372,0.970969,0.212789,0.422925,0.499997,0.901534,0.000328,0.742471,0.230231,0.494566,0.276643,0.4…	101	123	1127	1349	na	na	0	na	na	0.39857	0.593953	1227	1249	205	2580	0	1	0	-1	0.430135	-1	FALSE
all	RRM1_A375_gRNA1333	A375	RRM1	ACAACTTTGCGGACACGACCTTG	CAAGGTCGTGTCCGCAAAGTTGT	ENST00000300738	GACTAATCAGGACTGGTCTTTGATGTGTCCAAATGAGTGTCCTGGTCTGGATGAGGTTTGGGGAGAGGAATTTGAGAAACTATATGCAAGTTATGAGAAACAAGGTCGTGTCCGCAAAGTTGTAAAAGCTCAGCAGCTTTGGTATGCCATCATTGAGTCTCAGACGGAAACAGGCACCCCGTATATGCTCTACAAAGATTCCTGTAATCGAAAGAGCAACCAG	aacccctaccaactggtcggggtttgaaac	-13.4	((((((.(((....))).))))))...............((....))......	-39.55	-1,-1,-1,-1,-1,-1,-1,-1,-1,-1,-1,-1,-1,-1,-1,-1,-1,-1,-1,-1,-1,-1,-1,-1,-1,-1,-1,-1,-1,-1,-1,-1,-1,-1,-1,-1,-1,-1,-1,-1,-1,-1,-1,-1,-1,-1,-1,-1,-1,-1,-1,-1,-1,-1,-1,-1,-1,-1,-1,-1,-1,-1,-1,-1,-1,-1,-1,-1,-1,-1,-1,-1,-1,-1,-1,-1,-1,-1,-1,-1,-1,-1,-1,-1,-1,-1,-1,-1,-1,-1,0.338,0.562,0.9,0.113,0,0.217,0.108,0.758,0.325,0.106,0.425,0.319,-1,-1,-1,-1,-1,-1,-1,-1,-1,-1,-1,-1,-1,0.207,0.414,0.104,0.311,…	0.496318,0.115584,0.244423,0.615963,0.606132,0.353769,0.216764,0.119507,0.646375,0.997200,0.844922,0.124047,0.075273,0.998140,0.994823,0.033180,0.111478,0.266230,0.465613,0.342020,0.681109,0.590016,0.162273,0.800895,0.800766,0.749682,0.178530,0.540555,0.722940,0.395954,0.061946,0.019798,0.487702,0.000768,0.075593,0.001899,0.139654,0.060970,0.068676,0.080785,0.188618,0.034409,0.229172,0.712572,0.6…	101	123	1233	1455	na	na	0	na	na	0.43303	0.559493	1333	1355	205	2580	0	1	0	-1	0.474747	-1	FALSE
all	RRM1_A375_gRNA1334	A375	RRM1	TACAACTTTGCGGACACGACCTT	AAGGTCGTGTCCGCAAAGTTGTA	ENST00000300738	ACTAATCAGGACTGGTCTTTGATGTGTCCAAATGAGTGTCCTGGTCTGGATGAGGTTTGGGGAGAGGAATTTGAGAAACTATATGCAAGTTATGAGAAACAAGGTCGTGTCCGCAAAGTTGTAAAAGCTCAGCAGCTTTGGTATGCCATCATTGAGTCTCAGACGGAAACAGGCACCCCGTATATGCTCTACAAAGATTCCTGTAATCGAAAGAGCAACCAGC	aacccctaccaactggtcggggtttgaaac	-13.4	((((((.(((....))).))))))................((....)).....	-38.22	-1,-1,-1,-1,-1,-1,-1,-1,-1,-1,-1,-1,-1,-1,-1,-1,-1,-1,-1,-1,-1,-1,-1,-1,-1,-1,-1,-1,-1,-1,-1,-1,-1,-1,-1,-1,-1,-1,-1,-1,-1,-1,-1,-1,-1,-1,-1,-1,-1,-1,-1,-1,-1,-1,-1,-1,-1,-1,-1,-1,-1,-1,-1,-1,-1,-1,-1,-1,-1,-1,-1,-1,-1,-1,-1,-1,-1,-1,-1,-1,-1,-1,-1,-1,-1,-1,-1,-1,-1,0.338,0.562,0.9,0.113,0,0.217,0.108,0.758,0.325,0.106,0.425,0.319,-1,-1,-1,-1,-1,-1,-1,-1,-1,-1,-1,-1,-1,0.207,0.414,0.104,0.311,0.1…	0.448844,0.117185,0.318023,0.658095,0.653872,0.372626,0.218612,0.123150,0.690293,0.995596,0.857597,0.137353,0.089752,0.998153,0.995763,0.023186,0.088054,0.189856,0.445056,0.524281,0.700382,0.581742,0.179494,0.825797,0.581553,0.710007,0.125117,0.593085,0.641158,0.249196,0.083810,0.009684,0.508713,0.000890,0.102694,0.002396,0.114348,0.071845,0.074102,0.041500,0.102696,0.020465,0.120427,0.732840,0.6…	101	123	1234	1456	na	na	0	na	na	0.433355	0.559168	1334	1356	205	2580	0	1	0	-1	0.475168	-1	FALSE
all	RRM1_A375_gRNA1815	A375	RRM1	CACAGCTGGCTTCCAGAGCACCA	TGGTGCTCTGGAAGCCAGCTGTG	ENST00000300738	GGGTACAAGGTCTGGCAGATGCTTTTATCCTGATGAGATACCCTTTTGAGAGTGCAGAAGCCCAGTTACTGAATAAGCAGATCTTTGAAACTATTTATTATGGTGCTCTGGAAGCCAGCTGTGACCTTGCCAAGGAGCAGGGCCCATACGAAACCTATGAGGGCTCTCCAGTTAGCAAAGGAATTCTTCAGTATGATATGTGGAATGTTACTCCTACAGACCT	aacccctaccaactggtcggggtttgaaac	-16.2	((((((.(((....))).))))))...........((((...)))).......	-41.03	0,0,0.155,0.155,0.466,0.468,0,0,0.78,0.312,0,0,-1,-1,-1,-1,-1,-1,-1,-1,0.158,0.315,0.315,0.158,1,1,0.474,0,0.158,0.316,0.16,0.95,1,0.48,0.32,1,1,0.952,0.654,0.164,0.167,0.334,0.334,0.501,0.668,0.954,0.167,0.334,0.334,0.501,0,0,0,0,0.167,0,0,0,0,0,-1,-1,-1,-1,-1,-1,-1,-1,-1,-1,-1,-1,-1,-1,-1,-1,-1,-1,-1,-1,-1,-1,-1,-1,-1,-1,-1,-1,-1,-1,-1,-1,-1,-1,-1,-1,-1,-1,-1,-1,-1,-1,-1,-1,-1,-1,-1,-1,-1,-1,-1…	0.237124,0.446938,0.608692,0.149724,0.545075,0.336185,0.577259,0.776661,0.944459,0.493156,0.079453,0.822168,0.067337,0.944889,0.198920,0.000331,0.054034,0.628874,0.802127,0.906083,0.880897,0.987482,0.529015,0.933362,0.438140,0.235879,0.324900,0.791654,0.716644,0.366357,0.105145,0.279046,0.494389,0.271498,0.600148,0.133260,0.253265,0.561171,0.529157,0.001793,0.580004,0.035111,0.429635,0.147536,0.7…	101	123	1715	1937	na	na	0	na	na	0.589727	0.402796	1815	1837	205	2580	0	1	0	-1	0.677609	-1	FALSE
all	RRM1_A375_gRNA2284	A375	RRM1	AAAGCACCTCTCTCAGCTGCCAT	ATGGCAGCTGAGAGAGGTGCTTT	ENST00000300738	TGCATGCAATGGCTCTATTCAGAGCATACCAGAAATTCCTGATGACCTGAAGCAACTTTATAAAACTGTGTGGGAAATCTCTCAGAAAACTGTTCTCAAGATGGCAGCTGAGAGAGGTGCTTTCATTGATCAAAGCCAATCTTTGAACATCCACATTGCTGAGCCTAACTATGGCAAACTCACTAGTATGCACTTCTACGGCTGGAAGCAGGGTTTGAAGACT	aacccctaccaactggtcggggtttgaaac	-14.6	((((((.(((....))).)))))).........(((.((.....)).)))...	-35.83	-1,-1,-1,-1,-1,-1,-1,-1,-1,-1,-1,-1,-1,-1,-1,-1,-1,-1,-1,-1,-1,-1,0,0.194,0.388,0,0.194,0,0,0,0.769,0,0.381,0,0,0.191,0,0.189,0,0.378,0.568,0.378,0.376,0.188,-1,-1,-1,-1,-1,-1,-1,-1,-1,-1,-1,-1,-1,-1,-1,-1,-1,-1,-1,-1,-1,-1,-1,-1,-1,-1,-1,-1,-1,-1,-1,-1,-1,-1,-1,-1,-1,-1,-1,-1,-1,-1,-1,-1,-1,-1,-1,-1,-1,-1,-1,-1,-1,-1,-1,-1,0.931,0.752,0.57,0,0.19,0.38,0,0,0,0,0.768,0.192,0.384,0.384,0.576,0.192,…	0.603268,0.229269,0.470790,0.361595,0.278929,0.715687,0.043794,0.278768,0.726949,0.978488,0.544907,0.099954,0.116490,0.999596,0.888728,0.387906,0.057957,0.418460,0.449622,0.211491,0.563805,0.891334,0.745673,0.973060,0.084526,0.547469,0.086104,0.671268,0.664718,0.616782,0.935780,0.099457,0.712882,0.123153,0.332384,0.009491,0.065279,0.114812,0.046899,0.574935,0.022469,0.275407,0.139911,0.801021,0.6…	101	123	2184	2406	na	na	0	na	na	0.742198	0.250325	2284	2306	205	2580	0	1	0	-1	0.875	-1	FALSE
all	PRC1_A375_gRNA507	A375	PRC1	CTAAGCTGGGCACTGAGGCACTG	CAGTGCCTCAGTGCCCAGCTTAG	ENST00000394249	TGCGAAAACAGAAAAAGGAGAGAAAACAGGAACTGAAGCTACTTCAAGAGCAAGATCAAGAACTGTGCGAAATTCTTTGTATGCCCCACTATGATATTGACAGTGCCTCAGTGCCCAGCTTAGAAGAGCTGAACCAGTTCAGGCAACATGTGACAACTTTGAGGGAAACAAAGGCTTCTAGGCGTGAGGAGTTTGTCAGTATAAAGAGACAGATCATACTGTG	aacccctaccaactggtcggggtttgaaac	-15.2	((((((.(((....))).)))))).....((......))((......))....	-44.2	0.571,0.428,0.285,0,0.86,1,0.574,0.287,0.432,0.432,0.864,0.288,0.432,0.724,0.868,0.724,0.289,0.579,0.436,0.727,0.436,0,0.436,1,0.584,0.146,0.146,0.875,0,0.99,0.439,0.439,0.146,0,0.294,0.735,0,0.294,0.295,0.147,0,0,0.59,0.149,0.297,0.594,0.446,0.149,0.997,0.15,0.598,0.598,0,1,0.301,0,0,0.301,0,0,0.302,0.302,0,-1,-1,-1,-1,-1,-1,-1,-1,-1,-1,-1,-1,-1,-1,-1,-1,-1,-1,-1,-1,-1,-1,-1,-1,-1,-1,-1,-1,-1,-1…	0.097080,0.212723,0.199700,0.310677,0.413142,0.168833,0.290061,0.487542,0.465493,0.498375,0.024798,0.262083,0.007885,0.937837,0.331701,0.000067,0.009686,0.143791,0.528613,0.222187,0.775784,0.975488,0.168084,0.918514,0.148581,0.290830,0.117406,0.644620,0.794601,0.094786,0.085623,0.088596,0.405096,0.121808,0.678532,0.008959,0.056979,0.053625,0.329674,0.000289,0.297592,0.236303,0.231643,0.042350,0.2…	101	123	407	629	na	na	0	na	na	0.166777	0.825643	507	529	79	1938	0	1	0	-1	0.230108	-1	FALSE
all	PRC1_A375_gRNA1446	A375	PRC1	ACAGCATCTCTGTCTCTGTCTGT	ACAGACAGAGACAGAGATGCTGT	ENST00000394249	TGAATGGGCAGAAATTCATGGAGTATGTGGCAGAACAATGGGAGATGCATCGATTGGAGAAAGAGAGAGCCAAGCAGGAAAGACAACTGAAGAACAAAAAACAGACAGAGACAGAGATGCTGTATGGCAGCGCTCCTCGAACACCTAGCAAGCGGCGAGGACTGGCTCCCAATACACCGGGCAAAGCACGTAAGCTGAACACTACCACCATGTCCAATGCTAC	aacccctaccaactggtcggggtttgaaac	-14.5	((((((.(((....))).))))))......((((((..........)).))))	-38.34	-1,-1,-1,-1,-1,-1,-1,-1,-1,-1,-1,-1,-1,-1,0.771,0.096,0.289,1,0.096,0,0,0.096,0.193,0.578,0.867,0.771,0.096,0,0.289,0.289,0.385,0.289,0.578,0.675,0.385,0.289,1,0.867,0.193,0.382,0.382,0.477,0.859,0.955,0.845,0.658,0.47,0.376,0.752,0.182,0.273,0.636,1,0.455,-1,-1,-1,-1,-1,-1,-1,-1,-1,-1,-1,-1,-1,-1,-1,-1,-1,-1,-1,-1,-1,-1,-1,-1,-1,-1,-1,-1,-1,0.165,0.247,0.165,0,0.247,0.329,0.494,0.247,0.494,0.494…	0.228997,0.083716,0.559993,0.208742,0.149142,0.351034,0.145176,0.053936,0.176346,0.976743,0.052870,0.008015,0.285082,0.981064,0.716095,0.225970,0.032629,0.148092,0.660538,0.113285,0.283722,0.216270,0.237215,0.441290,0.976792,0.716280,0.562739,0.076618,0.879208,0.504558,0.932165,0.035129,0.192723,0.003623,0.598056,0.009180,0.368184,0.003143,0.001066,0.182971,0.011299,0.037405,0.233618,0.163464,0.7…	101	123	1346	1568	na	na	0	na	na	0.476269	0.51615	1446	1468	79	1938	0	1	0	-1	0.734946	-1	FALSE
all	PRC1_A375_gRNA1540	A375	PRC1	TTGGACATGGTGGTAGTGTTCAG	CTGAACACTACCACCATGTCCAA	ENST00000394249	CAAAAAACAGACAGAGACAGAGATGCTGTATGGCAGCGCTCCTCGAACACCTAGCAAGCGGCGAGGACTGGCTCCCAATACACCGGGCAAAGCACGTAAGCTGAACACTACCACCATGTCCAATGCTACGGCCAATAGTAGCATTCGGCCTATCTTTGGAGGGACAGTCTACCACTCCCCCGTGTCTCGACTTCCTCCTTCTGGCAGCAAGCCAGTCGCTGCT	aacccctaccaactggtcggggtttgaaac	-18.8	((((((.(((....))).)))))).......(((((((.......))))))).	-35.42	0.247,0.659,0.329,0.741,0.412,1,0.412,0.741,1,0.576,0.741,0.165,0.983,0.576,0.906,0.906,0.741,0.576,0.823,0.659,0.906,0.247,0.412,0.412,0.165,0.247,0.247,0.412,0.659,0.576,0.329,0.412,0.082,0,0.247,0.247,0.329,0.329,0.247,0.082,0.165,0.165,0.247,0.082,0.576,1,0.983,0.659,0.412,0.247,0.247,0.983,1,0.494,1,1,0.906,0.165,0,0.165,0,0.082,0.412,0,0.494,0.412,0.329,0.165,0,0.082,0.082,0,0.165,0,0,0.247…	0.124082,0.303755,0.476406,0.170898,0.883040,0.210702,0.229166,0.423684,0.591449,0.900949,0.186983,0.162325,0.029849,0.915895,0.814485,0.192525,0.457918,0.462393,0.117578,0.309167,0.779405,0.972875,0.215677,0.546922,0.229058,0.787273,0.250671,0.438071,0.506369,0.462022,0.390662,0.424635,0.519547,0.429261,0.172330,0.047824,0.040091,0.103894,0.101539,0.007699,0.412185,0.231996,0.049209,0.038419,0.1…	101	123	1440	1662	na	na	0	na	na	0.507251	0.485168	1540	1562	79	1938	0	1	0	-1	0.785484	-1	FALSE
all	PRC1_A375_gRNA1546	A375	PRC1	GTAGCATTGGACATGGTGGTAGT	ACTACCACCATGTCCAATGCTAC	ENST00000394249	ACAGACAGAGACAGAGATGCTGTATGGCAGCGCTCCTCGAACACCTAGCAAGCGGCGAGGACTGGCTCCCAATACACCGGGCAAAGCACGTAAGCTGAACACTACCACCATGTCCAATGCTACGGCCAATAGTAGCATTCGGCCTATCTTTGGAGGGACAGTCTACCACTCCCCCGTGTCTCGACTTCCTCCTTCTGGCAGCAAGCCAGTCGCTGCTTCCACC	aacccctaccaactggtcggggtttgaaac	-14.9	((((((.(((....))).)))))).......((.(((((....))))).))..	-39.45	0.412,0.741,1,0.576,0.741,0.165,0.983,0.576,0.906,0.906,0.741,0.576,0.823,0.659,0.906,0.247,0.412,0.412,0.165,0.247,0.247,0.412,0.659,0.576,0.329,0.412,0.082,0,0.247,0.247,0.329,0.329,0.247,0.082,0.165,0.165,0.247,0.082,0.576,1,0.983,0.659,0.412,0.247,0.247,0.983,1,0.494,1,1,0.906,0.165,0,0.165,0,0.082,0.412,0,0.494,0.412,0.329,0.165,0,0.082,0.082,0,0.165,0,0,0.247,0.412,0.412,0.494,0.741,0.659,0…	0.178063,0.328186,0.242421,0.288961,0.828098,0.579854,0.282865,0.561613,0.730491,0.903156,0.031697,0.101141,0.026824,0.874565,0.767848,0.065493,0.207615,0.272083,0.161433,0.187459,0.830703,0.971269,0.281899,0.685931,0.035680,0.662805,0.394859,0.650423,0.473937,0.510775,0.361706,0.211853,0.490453,0.390583,0.613751,0.023386,0.038225,0.126377,0.127666,0.003709,0.251892,0.213986,0.066687,0.051268,0.1…	101	123	1446	1668	na	na	0	na	na	0.509229	0.483191	1546	1568	79	1938	0	1	0	-1	0.78871	-1	FALSE
all	PRC1_A375_gRNA1799	A375	PRC1	CTCAGAATAGGTGCTGGCAACAG	CTGTTGCCAGCACCTATTCTGAG	ENST00000394249	AGGCATGGAGCCAACAAGGAGAACCTGGAGCTCAACGGCAGCATCCTGAGTGGTGGGTACCCTGGCTCGGCCCCCCTCCAGCGCAACTTCAGCATTAATTCTGTTGCCAGCACCTATTCTGAGTTTGCGAAGGATCCGTCCCTCTCTGACAGTTCCACTGTTGGGCTTCAGCGAGAACTTTCAAAGGCTTCCAAATCTGATGCTACTTCTGGAATCCTCAATT	aacccctaccaactggtcggggtttgaaac	-16.9	((((((.(((....))).))))))....((((......)))).(((....)))	-40.2	0.571,0.286,0,0.857,0.429,0.143,0,0.286,0.429,0.143,0,0.429,0.714,0.429,0.714,0.571,0.429,0.143,0.714,0.429,0.429,0.571,0.857,0.143,0.714,0.143,0.143,0.286,0.286,0.714,0.571,0.143,0.429,1,0.857,0.286,0.286,0.286,0.571,0.571,0.143,0.714,1,0.714,0.286,1,0.571,1,0.571,0,0.571,0.286,0,0.286,0.143,0.143,0,0.143,0.571,0.571,0,0,0,0,0.286,0.143,0,0.286,0.571,0,0,0.143,0,0,0,0.571,0,0.143,0.286,-1,-1,-1,…	0.039129,0.523585,0.195751,0.097206,0.615596,0.471492,0.133097,0.388585,0.110317,0.544948,0.154326,0.340186,0.008357,0.167642,0.142924,0.002090,0.012610,0.333474,0.482726,0.540130,0.700530,0.960334,0.152544,0.917894,0.009407,0.113358,0.531099,0.628231,0.728098,0.035368,0.105375,0.038779,0.706165,0.479851,0.077881,0.244207,0.033743,0.130678,0.463543,0.000099,0.063177,0.259937,0.268552,0.005038,0.4…	101	123	1699	1921	na	na	0	na	na	0.592617	0.399802	1799	1821	79	1938	0	1	0	-1	0.924731	-1	FALSE
all	PRC1_A375_gRNA1801	A375	PRC1	AACTCAGAATAGGTGCTGGCAAC	GTTGCCAGCACCTATTCTGAGTT	ENST00000394249	GCATGGAGCCAACAAGGAGAACCTGGAGCTCAACGGCAGCATCCTGAGTGGTGGGTACCCTGGCTCGGCCCCCCTCCAGCGCAACTTCAGCATTAATTCTGTTGCCAGCACCTATTCTGAGTTTGCGAAGGATCCGTCCCTCTCTGACAGTTCCACTGTTGGGCTTCAGCGAGAACTTTCAAAGGCTTCCAAATCTGATGCTACTTCTGGAATCCTCAATTCA	aacccctaccaactggtcggggtttgaaac	-14.5	((((((.(((....))).)))))).........((((........))))....	-38.33	0,0.857,0.429,0.143,0,0.286,0.429,0.143,0,0.429,0.714,0.429,0.714,0.571,0.429,0.143,0.714,0.429,0.429,0.571,0.857,0.143,0.714,0.143,0.143,0.286,0.286,0.714,0.571,0.143,0.429,1,0.857,0.286,0.286,0.286,0.571,0.571,0.143,0.714,1,0.714,0.286,1,0.571,1,0.571,0,0.571,0.286,0,0.286,0.143,0.143,0,0.143,0.571,0.571,0,0,0,0,0.286,0.143,0,0.286,0.571,0,0,0.143,0,0,0,0.571,0,0.143,0.286,-1,-1,-1,-1,-1,-1,-1,…	0.060362,0.558214,0.264751,0.133268,0.622882,0.437314,0.098273,0.439265,0.149670,0.537490,0.193869,0.351271,0.006015,0.173735,0.171747,0.002151,0.012965,0.389695,0.499008,0.409156,0.732318,0.963585,0.157844,0.940500,0.023902,0.093280,0.285458,0.360297,0.710804,0.069492,0.110925,0.018064,0.749818,0.400672,0.134968,0.177988,0.041624,0.132774,0.446068,0.000142,0.175927,0.134915,0.206218,0.013745,0.4…	101	123	1701	1923	na	na	0	na	na	0.593276	0.399143	1801	1823	79	1938	0	1	0	-1	0.925806	-1	FALSE
all	TERF2_A375_gRNA494	A375	TERF2	CAGCCTCCATATCAAAGGAACAG	CTGTTCCTTTGATATGGAGGCTG	ENST00000254942	AGGCTTTGCTTGTCAGGCCCTTGGGGAAGGAGCACACCGTGTCCCGATTGCTGCGGGTTATGCAGTGTCTGTCGCGGATTGAAGAAGGGGAAAATTTAGACTGTTCCTTTGATATGGAGGCTGAGCTCACACCACTGGAATCAGCTATCAATGTGCTGGAGATGATTAAAACGGAATTTACACTGACAGAAGCAGTGGTCGAATCCAGTAGAAAACTGGTCAA	aacccctaccaactggtcggggtttgaaac	-15	((((((.(((....))).))))))...........(((........)))....	-35.28	na	0.754122,0.084900,0.180615,0.680385,0.468726,0.092357,0.580029,0.324989,0.740313,0.899979,0.920930,0.033032,0.286960,0.975494,0.723168,0.579097,0.903438,0.674120,0.192225,0.843545,0.805280,0.287732,0.651609,0.335651,0.818557,0.694149,0.398857,0.574414,0.947506,0.524410,0.719094,0.102082,0.351793,0.263429,0.860064,0.585356,0.382751,0.039469,0.178092,0.712132,0.315250,0.763095,0.187975,0.763396,0.3…	101	123	394	616	na	na	0	na	na	0.16527	0.82702	494	516	18	1643	0	1	0	-1	0.292743	-1	FALSE
all	TERF2_A375_gRNA575	A375	TERF2	ATTCGACCACTGCTTCTGTCAGT	ACTGACAGAAGCAGTGGTCGAAT	ENST00000254942	AAGAAGGGGAAAATTTAGACTGTTCCTTTGATATGGAGGCTGAGCTCACACCACTGGAATCAGCTATCAATGTGCTGGAGATGATTAAAACGGAATTTACACTGACAGAAGCAGTGGTCGAATCCAGTAGAAAACTGGTCAAGGAAGCTGCTGTCATTATTTGTATCAAAAACAAAGAATTTGAAAAGGCTTCAAAAATTTTGAAAAAACATATGTCCAAGGA	aacccctaccaactggtcggggtttgaaac	-15.1	((((((.(((....))).))))))..............(((((....).))))	-36.85	na	0.768590,0.014919,0.025905,0.831561,0.766203,0.020768,0.453199,0.701315,0.801861,0.997647,0.723992,0.009877,0.417616,0.998857,0.818124,0.945950,0.864822,0.492596,0.596350,0.871507,0.901839,0.478943,0.871920,0.829511,0.931049,0.964434,0.255318,0.914157,0.934036,0.640643,0.786538,0.138322,0.046494,0.113291,0.702327,0.627266,0.797749,0.068918,0.009135,0.794356,0.236992,0.529189,0.154657,0.112636,0.7…	101	123	475	697	na	na	0	na	na	0.192424	0.799866	575	597	18	1643	0	1	0	-1	0.342558	-1	FALSE
all	TERF2_A375_gRNA619	A375	TERF2	GATACAAATAATGACAGCAGCTT	AAGCTGCTGTCATTATTTGTATC	ENST00000254942	CTCACACCACTGGAATCAGCTATCAATGTGCTGGAGATGATTAAAACGGAATTTACACTGACAGAAGCAGTGGTCGAATCCAGTAGAAAACTGGTCAAGGAAGCTGCTGTCATTATTTGTATCAAAAACAAAGAATTTGAAAAGGCTTCAAAAATTTTGAAAAAACATATGTCCAAGGACCCCACAACTCAGAAGCTGAGAAATGATCTCCTGAATATTATTC	aacccctaccaactggtcggggtttgaaac	-12.8	((((((.(((....))).)))))).............................	-35.06	na	0.743796,0.091066,0.032607,0.913938,0.602723,0.138074,0.693494,0.904038,0.934171,0.976352,0.903743,0.009550,0.362940,0.996852,0.159810,0.883837,0.919579,0.708715,0.416803,0.969646,0.931140,0.548295,0.802901,0.775063,0.968432,0.997079,0.555653,0.986970,0.872037,0.043985,0.941436,0.111185,0.047329,0.121537,0.764976,0.314527,0.719732,0.263314,0.035166,0.282295,0.307221,0.024622,0.327763,0.524822,0.4…	101	123	519	741	na	na	0	na	na	0.207174	0.785116	619	641	18	1643	0	1	0	-1	0.369619	-1	FALSE
all	TERF2_A375_gRNA708	A375	TERF2	AGGAGATCATTTCTCAGCTTCTG	CAGAAGCTGAGAAATGATCTCCT	ENST00000254942	ACTGGTCAAGGAAGCTGCTGTCATTATTTGTATCAAAAACAAAGAATTTGAAAAGGCTTCAAAAATTTTGAAAAAACATATGTCCAAGGACCCCACAACTCAGAAGCTGAGAAATGATCTCCTGAATATTATTCGAGAAAAGAACTTGGCCCATCCTGTTATCCAGAACTTTTCATATGAGACCTTCCAGCAGAAGATGCTGCGCTTCCTGGAGAGCCACCTG	aacccctaccaactggtcggggtttgaaac	-17.4	((((((.(((....))).)))))).(((.(..((((.....)))).).)))..	-33.95	na	0.203276,0.008195,0.069856,0.784966,0.582156,0.171637,0.687309,0.681557,0.898462,0.914386,0.528117,0.016755,0.379815,0.947473,0.299774,0.917049,0.971261,0.460207,0.772742,0.935276,0.809293,0.523445,0.776222,0.855734,0.779789,0.975330,0.658867,0.953935,0.873399,0.777646,0.275738,0.049593,0.138598,0.058003,0.895864,0.616236,0.526169,0.170812,0.005969,0.453491,0.064579,0.004801,0.277522,0.054507,0.5…	101	123	608	830	na	na	0	na	na	0.23701	0.75528	708	730	18	1643	0	1	0	-1	0.424354	-1	FALSE
all	TERF2_A375_gRNA1586	A375	TERF2	CCTTAATCATCACAGCTGTTCGG	CCGAACAGCTGTGATGATTAAGG	ENST00000254942	AGAAGTGGACTGTAGAAGAAAGCGAGTGGGTCAAGGCTGGAGTGCAGAAATATGGGGAAGGAAACTGGGCTGCCATTTCTAAAAATTACCCATTTGTTAACCGAACAGCTGTGATGATTAAGGATCGCTGGCGGACCATGAAAAGACTTGGCATGAACTGAAACAGGCTTTCATTTCCACAGAATTCACAGGAGCATGGTTCCTAATAATAGCCCCTGATAGT	aacccctaccaactggtcggggtttgaaac	-12.8	((((((.(((....))).)))))).............................	-40.17	na	0.942827,0.074447,0.085518,0.640779,0.529075,0.313745,0.397320,0.408229,0.789362,0.929478,0.957401,0.018794,0.738813,0.991051,0.689690,0.955830,0.779255,0.664976,0.864103,0.945206,0.951251,0.810295,0.896005,0.670527,0.680171,0.978969,0.269283,0.944130,0.947073,0.596817,0.920207,0.148037,0.444757,0.098829,0.764650,0.597571,0.319080,0.292906,0.048052,0.561886,0.050717,0.005870,0.805726,0.307112,0.6…	101	123	1486	1708	na	na	0	na	na	0.531344	0.460945	1586	1608	18	1643	0	1	0	-1	0.96433	-1	FALSE
all	TERF2_A375_gRNA1590	A375	TERF2	CGATCCTTAATCATCACAGCTGT	ACAGCTGTGATGATTAAGGATCG	ENST00000254942	GTGGACTGTAGAAGAAAGCGAGTGGGTCAAGGCTGGAGTGCAGAAATATGGGGAAGGAAACTGGGCTGCCATTTCTAAAAATTACCCATTTGTTAACCGAACAGCTGTGATGATTAAGGATCGCTGGCGGACCATGAAAAGACTTGGCATGAACTGAAACAGGCTTTCATTTCCACAGAATTCACAGGAGCATGGTTCCTAATAATAGCCCCTGATAGTCTGC	aacccctaccaactggtcggggtttgaaac	-12.8	((((((.(((....))).)))))).............................	-37.47	na	0.954283,0.058683,0.075511,0.812352,0.460280,0.333902,0.384116,0.406748,0.869586,0.953450,0.975343,0.020777,0.741587,0.990747,0.698931,0.965109,0.790066,0.706879,0.778876,0.957732,0.955180,0.785299,0.915449,0.634659,0.811636,0.968977,0.229939,0.952246,0.975442,0.623175,0.947981,0.148070,0.451952,0.107473,0.690886,0.638204,0.362081,0.361958,0.083189,0.544819,0.060548,0.010981,0.817071,0.661221,0.6…	101	123	1490	1712	na	na	0	na	na	0.532685	0.459604	1590	1612	18	1643	0	1	0	-1	0.96679	-1	FALSE
all	DDX23_A375_gRNA1364	A375	DDX23	CAGCCACACCAATGATGTCACGA	TCGTGACATCATTGGTGTGGCTG	ENST00000308025	ACTCTTCTCTGCCCCCACACATCTTGGAGGTCATTGATAAGTGTGGCTACAAGGAACCAACACCTATACAGCGTCAGGCAATTCCCATTGGGCTACAGAATCGTGACATCATTGGTGTGGCTGAGACTGGCAGTGGCAAGACAGCAGCCTTCCTCATCCCTCTGCTGGTCTGGATCACCACACTTCCCAAAATTGACAGGATCGAAGAGTCAGACCAAGGCCC	aacccctaccaactggtcggggtttgaaac	-12.8	((((((.(((....))).)))))).............................	-36.85	0.53,0,0,0.151,0.152,0.076,0.228,0.228,0.076,0.153,0,0,0.534,0,0,0.307,0.077,0.077,0.153,0.308,0.231,0.231,0.077,0.077,0.155,0.62,0.912,0.232,0.542,0.39,0.156,0.234,0.468,0.078,0.549,0.47,0.627,0.314,0.876,0.789,0.837,0.079,0.158,0.079,0.08,0,0.08,0.08,0.477,0.241,0.08,0,0,0.613,0.307,0.307,0,0.411,0.205,0.411,0.205,0.309,0,0.103,0.309,0.206,1,0.103,0.517,0.517,0.103,0.103,0.207,0.103,0.414,0.103…	0.083369,0.444142,0.040423,0.001580,0.662800,0.639009,0.008185,0.133726,0.012110,0.498838,0.864740,0.006519,0.076932,0.030645,0.834763,0.483677,0.038382,0.074642,0.619828,0.024032,0.737889,0.591110,0.156504,0.434985,0.010114,0.353272,0.377600,0.000977,0.132986,0.046331,0.518405,0.105965,0.953667,0.001505,0.201349,0.038104,0.016954,0.001235,0.000561,0.185105,0.040529,0.204452,0.284066,0.006817,0.7…	101	123	1264	1486	na	na	0	na	na	0.419643	0.573276	1364	1386	81	2540	0	1	0	-1	0.521545	-1	FALSE
all	DDX23_A375_gRNA1564	A375	DDX23	GACAGCCACAGTGCGGATACCTA	TAGGTATCCGCACTGTGGCTGTC	ENST00000308025	ATCGAAGAGTCAGACCAAGGCCCTTATGCCATCATCCTGGCTCCCACCCGTGAGTTGGCTCAACAGATTGAGGAAGAGACCATCAAGTTTGGGAAACCGCTAGGTATCCGCACTGTGGCTGTCATTGGTGGCATCTCCAGAGAAGACCAGGGCTTCAGGCTGCGCATGGGTTGTGAGATTGTGATTGCTACCCCTGGGCGTTTGATTGATGTGCTGGAGAACC	aacccctaccaactggtcggggtttgaaac	-13.6	((((((.(((....))).)))))).....((.((.......))))........	-42.19	-1,-1,-1,-1,-1,-1,-1,-1,-1,-1,-1,-1,-1,-1,-1,-1,-1,-1,-1,-1,-1,-1,-1,-1,-1,-1,-1,-1,-1,-1,-1,-1,-1,-1,0.139,0.418,0,0,0,0,0.418,0.139,0.139,0.279,0.418,-1,-1,-1,-1,-1,-1,-1,-1,0.279,0.279,0.697,0.139,0.279,0.279,0.279,0.139,0.418,0.139,0.418,0.697,0.418,1,0.697,0.697,0.558,0.697,0.139,0.558,0.837,0.837,0.837,0.837,0.837,1,0.139,0.558,0.418,0.837,0.558,0.558,1,0.697,0.558,0.976,0.279,0.558,0.139,0…	0.134908,0.526545,0.213250,0.518872,0.566840,0.721385,0.499450,0.219636,0.138666,0.986830,0.376294,0.165146,0.643114,0.989303,0.939708,0.607415,0.258582,0.188134,0.471742,0.821642,0.450142,0.482004,0.515302,0.916611,0.974050,0.444137,0.588834,0.700526,0.826236,0.241928,0.904768,0.019099,0.866527,0.031855,0.018395,0.018445,0.365163,0.090508,0.136385,0.645400,0.767587,0.326555,0.702705,0.150113,0.9…	101	123	1464	1686	na	na	0	na	na	0.481219	0.5117	1564	1586	81	2540	0	1	0	-1	0.602846	-1	FALSE
all	DDX23_A375_gRNA1565	A375	DDX23	TGACAGCCACAGTGCGGATACCT	AGGTATCCGCACTGTGGCTGTCA	ENST00000308025	TCGAAGAGTCAGACCAAGGCCCTTATGCCATCATCCTGGCTCCCACCCGTGAGTTGGCTCAACAGATTGAGGAAGAGACCATCAAGTTTGGGAAACCGCTAGGTATCCGCACTGTGGCTGTCATTGGTGGCATCTCCAGAGAAGACCAGGGCTTCAGGCTGCGCATGGGTTGTGAGATTGTGATTGCTACCCCTGGGCGTTTGATTGATGTGCTGGAGAACCG	aacccctaccaactggtcggggtttgaaac	-14.9	((((((.(((....))).))))))....((((.......))))..........	-41.83	-1,-1,-1,-1,-1,-1,-1,-1,-1,-1,-1,-1,-1,-1,-1,-1,-1,-1,-1,-1,-1,-1,-1,-1,-1,-1,-1,-1,-1,-1,-1,-1,-1,0.139,0.418,0,0,0,0,0.418,0.139,0.139,0.279,0.418,-1,-1,-1,-1,-1,-1,-1,-1,0.279,0.279,0.697,0.139,0.279,0.279,0.279,0.139,0.418,0.139,0.418,0.697,0.418,1,0.697,0.697,0.558,0.697,0.139,0.558,0.837,0.837,0.837,0.837,0.837,1,0.139,0.558,0.418,0.837,0.558,0.558,1,0.697,0.558,0.976,0.279,0.558,0.139,0.69…	0.132886,0.537901,0.213330,0.465766,0.553304,0.837059,0.497199,0.209884,0.155490,0.982176,0.386886,0.191697,0.730416,0.985578,0.942506,0.701666,0.207331,0.220634,0.467116,0.762678,0.503279,0.491527,0.510466,0.928377,0.975572,0.425941,0.556855,0.619698,0.891433,0.278586,0.931053,0.026729,0.866462,0.036618,0.029575,0.018547,0.409971,0.138319,0.080596,0.687884,0.503986,0.279360,0.703889,0.158924,0.9…	101	123	1465	1687	na	na	0	na	na	0.481527	0.511392	1565	1587	81	2540	0	1	0	-1	0.603252	-1	FALSE
all	DDX23_A375_gRNA2235	A375	DDX23	CGACCAGCCACATCTGTAGCCAC	GTGGCTACAGATGTGGCTGGTCG	ENST00000308025	GAAGATGGGGTACAATGCTTGCACACTGCACGGTGGAAAAGGCCAGGAGCAGCGAGAGTTTGCGTTGTCCAACCTCAAGGCTGGGGCCAAGGATATTTTGGTGGCTACAGATGTGGCTGGTCGTGGTATTGACATCCAAGATGTGTCTATGGTTGTCAACTATGATATGGCCAAAAATATTGAAGATTACATCCACCGCATTGGCCGCACGGGACGAGCAGGC	aacccctaccaactggtcggggtttgaaac	-15	............((((((((.........))))))))................	-38.87	0.556,1,0.667,0.889,1,0,0,0,-1,-1,-1,-1,-1,-1,-1,-1,-1,-1,-1,-1,-1,-1,-1,-1,-1,-1,-1,-1,-1,-1,-1,-1,-1,-1,-1,-1,-1,-1,0.829,0,0.144,-1,-1,-1,-1,-1,-1,-1,-1,-1,-1,-1,-1,-1,-1,-1,-1,-1,-1,-1,-1,-1,-1,-1,-1,-1,-1,-1,-1,-1,-1,-1,-1,-1,-1,-1,-1,-1,-1,-1,-1,-1,-1,-1,-1,-1,-1,-1,-1,-1,-1,-1,-1,-1,-1,-1,-1,-1,-1,-1,-1,-1,-1,-1,-1,-1,-1,-1,-1,-1,-1,0.808,0.139,0.417,0,0,0,0,0.556,0,0,0,0.139,0,0.139,0,0.1…	0.068305,0.420834,0.109949,0.168600,0.205188,0.037354,0.195645,0.589360,0.782504,0.963994,0.233218,0.499627,0.003275,0.940265,0.696564,0.261252,0.062468,0.050844,0.571258,0.116824,0.830143,0.841408,0.146000,0.812072,0.183869,0.095005,0.181531,0.109894,0.968069,0.057657,0.250698,0.634200,0.565959,0.200929,0.745425,0.043944,0.066148,0.053305,0.006810,0.003905,0.450131,0.289183,0.020458,0.298835,0.5…	101	123	2135	2357	na	na	0	na	na	0.687808	0.305111	2235	2257	81	2540	0	1	0	-1	0.87561	-1	FALSE
all	DDX23_A375_gRNA2410	A375	DDX23	CAGGATAGCTTGCTTCAGCTCGT	ACGAGCTGAAGCAAGCTATCCTG	ENST00000308025	AATATTGAAGATTACATCCACCGCATTGGCCGCACGGGACGAGCAGGCAAGAGTGGGGTGGCCATCACCTTCCTCACAAAAGAGGACTCTGCTGTGTTCTACGAGCTGAAGCAAGCTATCCTGGAAAGCCCAGTGTCTTCCTGTCCCCCCGAACTAGCCAACCACCCAGATGCCCAGCATAAGCCAGGCACCATCCTCACCAAGAAGCGCCGGGAAGAGACCA	aacccctaccaactggtcggggtttgaaac	-16.2	((((((.(((....))).))))))((((..((((....)))).))))......	-36.63	0.629,0.755,0.881,0.625,0.625,1,1,0.625,0,0,0.442,0.442,0.585,0.439,0.585,0.805,0.073,0.073,0,0,0,0.145,0.144,0.144,0.217,0,0.144,0.144,0.072,0,0.072,0.216,0.143,0.286,0,0.143,0.286,0.356,0.071,0.071,0.071,0.142,0,0.071,0.142,0.212,0.071,0.353,0.494,0.564,0.141,0.635,0.07,0,0.351,0.07,0.07,0.07,0,0.07,0.28,0.14,0.488,0.834,0.418,0.349,0.07,0,0.07,0.487,0.209,0.07,0.069,0,0.208,0.208,0.416,1,1,1,1…	0.012507,0.204033,0.375859,0.003277,0.306242,0.681820,0.003832,0.088804,0.002110,0.653138,0.722175,0.005160,0.099581,0.056526,0.336104,0.014805,0.019932,0.253602,0.089001,0.007080,0.804663,0.465034,0.108992,0.935344,0.188381,0.864255,0.183060,0.025679,0.182242,0.092504,0.000190,0.001731,0.286746,0.014317,0.474839,0.006386,0.014865,0.019282,0.002986,0.230800,0.032585,0.019927,0.003721,0.148580,0.4…	101	123	2310	2532	na	na	0	na	na	0.741687	0.251232	2410	2432	81	2540	0	1	0	-1	0.946748	-1	FALSE
all	DDX23_A375_gRNA2424	A375	DDX23	GACACTGGGCTTTCCAGGATAGC	GCTATCCTGGAAAGCCCAGTGTC	ENST00000308025	CATCCACCGCATTGGCCGCACGGGACGAGCAGGCAAGAGTGGGGTGGCCATCACCTTCCTCACAAAAGAGGACTCTGCTGTGTTCTACGAGCTGAAGCAAGCTATCCTGGAAAGCCCAGTGTCTTCCTGTCCCCCCGAACTAGCCAACCACCCAGATGCCCAGCATAAGCCAGGCACCATCCTCACCAAGAAGCGCCGGGAAGAGACCATCTTTGCCTGACAC	aacccctaccaactggtcggggtttgaaac	-17.7	((((((.(((....))).))))))..........((((.....))))......	-36.31	0.585,0.805,0.073,0.073,0,0,0,0.145,0.144,0.144,0.217,0,0.144,0.144,0.072,0,0.072,0.216,0.143,0.286,0,0.143,0.286,0.356,0.071,0.071,0.071,0.142,0,0.071,0.142,0.212,0.071,0.353,0.494,0.564,0.141,0.635,0.07,0,0.351,0.07,0.07,0.07,0,0.07,0.28,0.14,0.488,0.834,0.418,0.349,0.07,0,0.07,0.487,0.209,0.07,0.069,0,0.208,0.208,0.416,1,1,1,1,0.069,0.069,0.208,0.069,0.347,0,0.07,0.07,0.139,0,0.07,0.209,0.418,…	0.033996,0.117097,0.221046,0.002640,0.409432,0.709134,0.006845,0.035667,0.000678,0.269931,0.760542,0.003614,0.278920,0.483317,0.230659,0.059977,0.008388,0.190266,0.209343,0.015973,0.717350,0.180349,0.137815,0.809888,0.057132,0.764803,0.345535,0.019402,0.266513,0.019375,0.000332,0.003308,0.116184,0.017437,0.375568,0.005491,0.009726,0.003350,0.002261,0.381356,0.004037,0.044261,0.002474,0.082391,0.5…	101	123	2324	2546	na	na	0	na	na	0.745998	0.246921	2424	2446	81	2540	0	1	0	-1	0.952439	-1	FALSE
all	TCP1_A375_gRNA650	A375	TCP1	AACGCACTGCTTCCTTGCAAGCA	TGCTTGCAAGGAAGCAGTGCGTT	ENST00000321394	CTACTTCAGTGGTTATTATTGCAGCAGAACTCCTAAAAAATGCAGATGAATTAGTCAAACAGAAAATTCATCCCACATCAGTTATTAGTGGCTATCGACTTGCTTGCAAGGAAGCAGTGCGTTATATCAATGAAAACCTAATTGTTAACACAGATGAACTGGGAAGAGATTGCCTGATTAATGCTGCTAAGACATCCATGTCTTCCAAAATCATTGGAATAAA	aacccctaccaactggtcggggtttgaaac	-16.9	((((((.(((....))).)))))).........((..(((......))).)).	-33.08	-1,-1,-1,-1,-1,-1,-1,-1,-1,-1,-1,-1,-1,-1,-1,-1,-1,-1,-1,-1,-1,-1,-1,-1,-1,-1,-1,-1,-1,-1,-1,-1,-1,-1,-1,-1,-1,-1,-1,-1,-1,-1,-1,-1,-1,-1,-1,-1,-1,-1,-1,-1,-1,-1,-1,-1,-1,-1,-1,-1,-1,-1,-1,-1,-1,-1,-1,-1,-1,-1,-1,-1,-1,-1,-1,-1,-1,-1,-1,-1,-1,-1,-1,-1,-1,-1,-1,-1,-1,-1,-1,-1,-1,-1,-1,-1,-1,-1,-1,-1,-1,-1,-1,-1,-1,-1,-1,-1,-1,-1,-1,-1,-1,-1,-1,-1,-1,-1,-1,-1,-1,-1,-1,-1,-1,-1,-1,-1,-1,-1,-1,-1,-1,…	0.960048,0.518990,0.667536,0.165358,0.539385,0.717156,0.143815,0.856218,0.850852,0.663612,0.244533,0.715733,0.049309,0.986460,0.041974,0.000522,0.551838,0.453530,0.620767,0.957724,0.876660,0.997868,0.714200,0.971318,0.700448,0.813020,0.719471,0.974039,0.818871,0.185110,0.095817,0.345856,0.750965,0.184170,0.560184,0.017850,0.299672,0.349995,0.474022,0.000324,0.562887,0.008092,0.310349,0.058610,0.6…	101	123	550	772	na	na	0	na	na	0.259704	0.731092	650	672	282	1949	0	1	0	-1	0.220624	-1	FALSE
all	TCP1_A375_gRNA834	A375	TCP1	ACTGGATAGCGTGGCTGGCCTCT	AGAGGCCAGCCACGCTATCCAGT	ENST00000321394	TGCTAAGACATCCATGTCTTCCAAAATCATTGGAATAAATGGTGATTTCTTTGCTAACATGGTAGTAGATGCTGTACTTGCTATTAAATACACAGACATAAGAGGCCAGCCACGCTATCCAGTCAACTCTGTTAATATTTTGAAAGCCCATGGGAGAAGTCAAATGGAGAGTATGCTCATCAGTGGCTATGCACTCAACTGTGTGGTGGGATCCCAGGGCATG	aacccctaccaactggtcggggtttgaaac	-16.9	((((((.(((....))).)))))).........((.((((...)))).))...	-41.49	-1,-1,-1,-1,-1,-1,-1,-1,-1,-1,-1,-1,-1,-1,-1,-1,-1,-1,-1,-1,-1,-1,-1,-1,-1,-1,-1,-1,-1,-1,-1,-1,-1,-1,-1,-1,0.165,0.11,0.274,0.055,0.219,0,0.109,0,0.164,0.055,0.055,0.055,0.055,0.109,0.218,0.109,0.273,0.164,0.436,0.709,0.327,0.489,0.38,0.272,0.435,0.38,0.815,0.598,0.272,1,0.815,0.598,0.947,0.947,0.217,0.109,0.326,0.707,0.908,0.652,0.109,0.163,0.109,0.054,0.054,0.217,0.435,0.489,0.707,0.98,0.707,0…	0.771811,0.067029,0.047242,0.509768,0.562396,0.494886,0.049035,0.475991,0.321302,0.880630,0.394963,0.000793,0.209686,0.982922,0.088625,0.140913,0.457313,0.426231,0.273295,0.285358,0.290499,0.859437,0.150603,0.944886,0.224343,0.373591,0.602809,0.888628,0.247686,0.098009,0.082196,0.022774,0.508914,0.021351,0.663330,0.015475,0.019850,0.047559,0.002384,0.049531,0.002035,0.000303,0.346748,0.002608,0.3…	101	123	734	956	na	na	0	na	na	0.333333	0.657463	834	856	282	1949	0	1	0	-1	0.330935	-1	FALSE
all	TCP1_A375_gRNA1460	A375	TCP1	TCTTCACTACACAAAGTGCATCA	TGATGCACTTTGTGTAGTGAAGA	ENST00000321394	AGCTGATCTTAATCAAAAATACTAAGGCTCGTACGTCTGCATCGATTATCTTACGTGGGGCAAATGATTTCATGTGTGATGAGATGGAGCGCTCTTTACATGATGCACTTTGTGTAGTGAAGAGAGTTTTGGAGTCAAAATCTGTGGTTCCCGGTGGGGGTGCTGTAGAAGCAGCCCTTTCCATATACCTTGAAAACTATGCAACCAGCATGGGGTCTCGGGA	aacccctaccaactggtcggggtttgaaac	-14.8	((((((.(((....))).))))))..........((((......)))).....	-32.53	0.046,0.182,0.182,0.228,0.638,0.865,-1,-1,-1,-1,-1,-1,-1,-1,-1,-1,-1,-1,-1,1,1,1,0.87,1,0.219,0.822,0.164,0.274,0.055,0.386,0.772,0.441,0.11,0.276,0.055,0.388,0.055,0.388,0.111,0.557,0.502,0.334,0.111,0.446,1,0.504,0.672,0.728,0.392,0.619,0.563,0.563,0.45,0.225,0.565,0.282,0.282,0.113,0.282,0.227,0.113,0.057,0.454,0.624,0.285,0.341,0.91,0.398,0.341,0.057,0.228,0.228,0.228,0.228,0.286,0.229,0.401,…	0.915885,0.181417,0.216797,0.460347,0.911979,0.561798,0.164311,0.220953,0.842018,0.809899,0.806022,0.003508,0.177686,0.843092,0.316357,0.006610,0.532120,0.355827,0.563764,0.561714,0.928978,0.564861,0.710571,0.926471,0.314586,0.838687,0.371658,0.342314,0.595315,0.178576,0.999255,0.022417,0.956803,0.018164,0.995086,0.008255,0.679929,0.407172,0.351317,0.769460,0.315994,0.153412,0.045881,0.111923,0.2…	101	123	1360	1582	na	na	0	na	na	0.583834	0.406963	1460	1482	282	1949	0	1	0	-1	0.706235	-1	FALSE
all	TCP1_A375_gRNA1834	A375	TCP1	AAGAATGGTGATTGCAGCTTCTG	CAGAAGCTGCAATCACCATTCTT	ENST00000321394	TGGATTGGTCTTGATTTGAGCAATGGTAAACCTCGAGACAACAAACAAGCAGGGGTGTTTGAACCAACCATAGTTAAAGTTAAGAGTTTGAAATTTGCAACAGAAGCTGCAATCACCATTCTTCGAATTGATGATCTTATTAAATTACATCCAGAAAGTAAAGATGATAAACATGGAAGTTATGAAGATGCTGTTCACTCTGGAGCCCTTAATGATTGATCTG	aacccctaccaactggtcggggtttgaaac	-16.3	((((((.(((....))).)))))).......((((.(.((....)).))))).	-35.04	0,-1,0.943,1,0.632,0.398,0.468,0.351,0.491,0.302,0.349,0.418,0.372,0.922,0.462,0.878,0.624,1,1,0.555,0.532,0.986,0.856,0.393,0.696,0.371,1,1,1,0.772,0.281,0.234,0.187,0.117,0.518,0.495,0.353,0.165,0.188,0.403,0.166,0.19,0.213,0.403,0.072,0.119,0.286,0.286,0.119,0.168,0.096,0,0,0.144,0,0,0.024,0.072,0.072,0,0.073,0.169,0.097,0,0.121,0,0.048,0.023,0,0.096,0.17,0.096,0.072,0.145,0.145,0.268,0.342,0.…	0.704492,0.528643,0.629700,0.627799,0.394510,0.020496,0.401072,0.654658,0.857828,0.954175,0.933119,0.049688,0.658544,0.998724,0.780125,0.353986,0.920631,0.786274,0.661729,0.913891,0.963615,0.971461,0.639751,0.928686,0.956997,0.954869,0.665871,0.925456,0.917018,0.387028,0.923136,0.196682,0.273496,0.072434,0.862205,0.216521,0.701000,0.899817,0.035714,0.662090,0.047112,0.005104,0.662097,0.397129,0.5…	101	123	1734	1956	na	na	0	na	na	0.733493	0.257303	1834	1856	282	1949	0	1	0	-1	0.930456	-1	FALSE
all	TCP1_A375_gRNA1835	A375	TCP1	GAAGAATGGTGATTGCAGCTTCT	AGAAGCTGCAATCACCATTCTTC	ENST00000321394	GGATTGGTCTTGATTTGAGCAATGGTAAACCTCGAGACAACAAACAAGCAGGGGTGTTTGAACCAACCATAGTTAAAGTTAAGAGTTTGAAATTTGCAACAGAAGCTGCAATCACCATTCTTCGAATTGATGATCTTATTAAATTACATCCAGAAAGTAAAGATGATAAACATGGAAGTTATGAAGATGCTGTTCACTCTGGAGCCCTTAATGATTGATCTGA	aacccctaccaactggtcggggtttgaaac	-16	((((((.(((....))).))))))......((((..((.......)).)))).	-35.59	-1,0.943,1,0.632,0.398,0.468,0.351,0.491,0.302,0.349,0.418,0.372,0.922,0.462,0.878,0.624,1,1,0.555,0.532,0.986,0.856,0.393,0.696,0.371,1,1,1,0.772,0.281,0.234,0.187,0.117,0.518,0.495,0.353,0.165,0.188,0.403,0.166,0.19,0.213,0.403,0.072,0.119,0.286,0.286,0.119,0.168,0.096,0,0,0.144,0,0,0.024,0.072,0.072,0,0.073,0.169,0.097,0,0.121,0,0.048,0.023,0,0.096,0.17,0.096,0.072,0.145,0.145,0.268,0.342,0.07…	0.815290,0.508421,0.666915,0.660120,0.423554,0.053650,0.411126,0.614680,0.854278,0.959168,0.931727,0.069392,0.605973,0.998899,0.763769,0.208913,0.920249,0.724997,0.728900,0.810816,0.958322,0.970549,0.684596,0.943762,0.967577,0.956453,0.604036,0.886659,0.933411,0.491356,0.946664,0.151992,0.344720,0.078909,0.875620,0.180404,0.658719,0.886789,0.036013,0.689286,0.084152,0.007361,0.598295,0.374443,0.5…	101	123	1735	1957	na	na	0	na	na	0.733894	0.256903	1835	1857	282	1949	0	1	0	-1	0.931055	-1	FALSE
all	TCP1_A375_gRNA1921	A375	TCP1	AAGGGCTCCAGAGTGAACAGCAT	ATGCTGTTCACTCTGGAGCCCTT	ENST00000321394	TTGAAATTTGCAACAGAAGCTGCAATCACCATTCTTCGAATTGATGATCTTATTAAATTACATCCAGAAAGTAAAGATGATAAACATGGAAGTTATGAAGATGCTGTTCACTCTGGAGCCCTTAATGATTGATCTGATGTTCCTTTTATTTATAACAATGTTAAATGCAATTGTCTTGTACCTTGAGTTGAGTATTACACATTAAAGTAAAGTACAAGCTGTA	aacccctaccaactggtcggggtttgaaac	-13.2	((((((.(((....))).))))))..........(((...........)))..	-40.93	0.244,0.12,0.045,0.294,0.319,0.12,0.344,0.07,0.095,0.07,0.095,0.07,0.07,0.095,0.195,0.471,0.722,0.346,0.12,0.095,0.095,0.07,0.196,0.372,0.573,0.12,0.271,0.07,0,0.095,0.145,0.095,0.095,0.095,0.171,0.095,0,0.045,0.02,0,0.02,0.095,0.095,0.121,0.045,0.146,0.02,0.121,0.146,0.07,0.096,0.121,0.096,0.273,0.299,0.324,0.324,0.655,0.782,0.325,0.63,0.35,0.249,0.122,0.351,0.351,0.325,0.919,0.941,0.835,0.529,0…	0.838364,0.807524,0.147872,0.918427,0.778671,0.624797,0.606957,0.806258,0.995569,0.985867,0.998964,0.039305,0.922650,0.988414,0.225442,0.014721,0.950137,0.339961,0.097135,0.788758,0.914632,0.916740,0.716918,0.959535,0.999940,0.949820,0.552930,0.996436,0.988285,0.282007,0.960878,0.307332,0.360463,0.065935,0.992681,0.000766,0.738511,0.766113,0.008071,0.093221,0.088324,0.022833,0.442420,0.059918,0.9…	101	123	1821	2043	na	na	0	na	na	0.768307	0.222489	1921	1943	282	1949	0	1	0	-1	0.982614	-1	FALSE
all	IARS1_A375_gRNA896	A375	IARS1	AGGATCTCATAGTCACTCTCCAA	TTGGAGAGTGACTATGAGATCCT	ENST00000443024	TGTGTGTGTTAATCCAGAAATGCAATATGTGAAAATTAAAGATGTTGCCAGAGGACGATTACTCATTTTAATGGAAGCCAGATTGTCAGCCCTCTATAAATTGGAGAGTGACTATGAGATCCTTGAAAGATTTCCTGGTGCCTATCTTAAAGGCAAGAAGTACAGGCCCCTGTTTGACTATTTCCTGAAGTGTAAAGAGAATGGCGCTTTCACTGTGCTTGTT	aacccctaccaactggtcggggtttgaaac	-13.4	((((((.(((....))).)))))).......(((..............)))..	-38.75	0.223,0,0.149,0.298,0.298,0.223,0.298,0.298,0.521,0.67,0.889,1,0.296,0.148,0.074,0.516,0.221,1,1,0.516,0.368,0.368,0.294,0.809,0.736,0.587,0,0.22,0.294,0.147,0,0.22,0.146,0.146,0.22,0.146,0.219,0.585,0.073,0,0,-1,-1,-1,-1,-1,-1,-1,-1,-1,-1,-1,-1,-1,-1,-1,-1,-1,-1,-1,-1,-1,-1,-1,-1,-1,-1,-1,-1,-1,-1,-1,-1,-1,-1,-1,-1,-1,-1,-1,-1,-1,-1,-1,-1,-1,-1,-1,-1,-1,-1,-1,-1,-1,-1,-1,-1,-1,-1,-1,-1,-1,-1,-1,…	0.818423,0.434180,0.539672,0.317190,0.541656,0.498993,0.245042,0.827877,0.918360,0.678565,0.180133,0.654424,0.007384,0.986890,0.384754,0.000482,0.263606,0.618847,0.718455,0.928799,0.854709,0.997966,0.604080,0.946474,0.672285,0.615459,0.220915,0.938817,0.889567,0.550072,0.110122,0.396947,0.757648,0.047234,0.798597,0.012655,0.349354,0.391157,0.735108,0.000922,0.601530,0.006277,0.348283,0.203414,0.6…	101	123	796	1018	na	na	0	na	na	0.206174	0.788528	896	918	92	3817	0	1	0	-1	0.215781	-1	FALSE
all	IARS1_A375_gRNA897	A375	IARS1	AAGGATCTCATAGTCACTCTCCA	TGGAGAGTGACTATGAGATCCTT	ENST00000443024	GTGTGTGTTAATCCAGAAATGCAATATGTGAAAATTAAAGATGTTGCCAGAGGACGATTACTCATTTTAATGGAAGCCAGATTGTCAGCCCTCTATAAATTGGAGAGTGACTATGAGATCCTTGAAAGATTTCCTGGTGCCTATCTTAAAGGCAAGAAGTACAGGCCCCTGTTTGACTATTTCCTGAAGTGTAAAGAGAATGGCGCTTTCACTGTGCTTGTTG	aacccctaccaactggtcggggtttgaaac	-13.4	((((((.(((....))).))))))........(((..............))).	-38.45	0,0.149,0.298,0.298,0.223,0.298,0.298,0.521,0.67,0.889,1,0.296,0.148,0.074,0.516,0.221,1,1,0.516,0.368,0.368,0.294,0.809,0.736,0.587,0,0.22,0.294,0.147,0,0.22,0.146,0.146,0.22,0.146,0.219,0.585,0.073,0,0,-1,-1,-1,-1,-1,-1,-1,-1,-1,-1,-1,-1,-1,-1,-1,-1,-1,-1,-1,-1,-1,-1,-1,-1,-1,-1,-1,-1,-1,-1,-1,-1,-1,-1,-1,-1,-1,-1,-1,-1,-1,-1,-1,-1,-1,-1,-1,-1,-1,-1,-1,-1,-1,-1,-1,-1,-1,-1,-1,-1,-1,-1,-1,-1,-1,…	0.800588,0.413533,0.518009,0.428323,0.487752,0.459106,0.290191,0.837502,0.903358,0.701876,0.217218,0.577158,0.010024,0.990781,0.284724,0.000524,0.284553,0.661504,0.705222,0.935059,0.856132,0.998153,0.565677,0.949947,0.681924,0.622935,0.249479,0.958064,0.887841,0.592900,0.111754,0.442618,0.812839,0.065892,0.883580,0.012532,0.348736,0.457598,0.659720,0.000821,0.474833,0.008355,0.367423,0.193313,0.6…	101	123	797	1019	na	na	0	na	na	0.206404	0.788298	897	919	92	3817	0	1	0	-1	0.216049	-1	FALSE
all	IARS1_A375_gRNA900	A375	IARS1	TTCAAGGATCTCATAGTCACTCT	AGAGTGACTATGAGATCCTTGAA	ENST00000443024	TGTGTTAATCCAGAAATGCAATATGTGAAAATTAAAGATGTTGCCAGAGGACGATTACTCATTTTAATGGAAGCCAGATTGTCAGCCCTCTATAAATTGGAGAGTGACTATGAGATCCTTGAAAGATTTCCTGGTGCCTATCTTAAAGGCAAGAAGTACAGGCCCCTGTTTGACTATTTCCTGAAGTGTAAAGAGAATGGCGCTTTCACTGTGCTTGTTGACA	aacccctaccaactggtcggggtttgaaac	-13.3	.(((((.(((....))).)))))((((....))))..................	-37.37	0.298,0.223,0.298,0.298,0.521,0.67,0.889,1,0.296,0.148,0.074,0.516,0.221,1,1,0.516,0.368,0.368,0.294,0.809,0.736,0.587,0,0.22,0.294,0.147,0,0.22,0.146,0.146,0.22,0.146,0.219,0.585,0.073,0,0,-1,-1,-1,-1,-1,-1,-1,-1,-1,-1,-1,-1,-1,-1,-1,-1,-1,-1,-1,-1,-1,-1,-1,-1,-1,-1,-1,-1,-1,-1,-1,-1,-1,-1,-1,-1,-1,-1,-1,-1,-1,-1,-1,-1,-1,-1,-1,-1,-1,-1,-1,-1,-1,-1,-1,-1,-1,-1,-1,-1,-1,-1,-1,-1,-1,-1,-1,-1,-1,-1…	0.757036,0.483830,0.674369,0.351780,0.464298,0.548163,0.320821,0.787157,0.945558,0.739089,0.105380,0.751536,0.006441,0.991710,0.378308,0.000276,0.191407,0.604840,0.781342,0.964979,0.840541,0.997328,0.582945,0.953231,0.755415,0.684868,0.251917,0.960238,0.898175,0.585555,0.112238,0.474375,0.861818,0.047775,0.814211,0.028269,0.366123,0.391765,0.654718,0.000886,0.643386,0.009569,0.515439,0.252619,0.6…	101	123	800	1022	na	na	0	na	na	0.207095	0.787607	900	922	92	3817	0	1	0	-1	0.216855	-1	FALSE
all	IARS1_A375_gRNA1173	A375	IARS1	CTGTCCTGCGAAATCTGTCACCT	AGGTGACAGATTTCGCAGGACAG	ENST00000443024	TTCGGTGCTGAGGACTATCGGGTCTGTATGGACTTTAACATTATTCGGAAAGACTCACTCCCTGTTTGCCCTGTGGATGCTTCAGGCTGCTTCACAACGGAGGTGACAGATTTCGCAGGACAGTATGTGAAGGATGCTGACAAAAGTATCATCAGGACTTTGAAGGAACAAGGCCGACTTCTGGTTGCCACCACCTTCACTCACAGCTACCCTTTTTGCTGGA	aacccctaccaactggtcggggtttgaaac	-12.9	((((((.(((....))).))))))(((......((....))......)))...	-40.68	-1,-1,-1,-1,-1,-1,-1,-1,-1,0.196,0.131,0.196,0.065,0.131,0.261,0.586,0.959,0.261,0.13,0,0.065,0.13,0,0,0.065,0.388,0.194,0.065,0.129,0.064,0.193,0,0.129,0.193,0.708,0.708,0.644,0.708,0.322,0.515,0.837,0.895,0.985,0.837,0.386,0.193,0.772,0.515,0.895,1,0.451,0.837,0.322,0.193,0.193,0.386,0.257,0.322,0.579,0.193,0.064,0.257,0.129,0.644,0.837,0.837,1,0.386,0.257,0.129,0.257,0.193,0.322,0.257,0.451,0.…	0.601553,0.615238,0.379165,0.305920,0.405627,0.616561,0.461016,0.843352,0.974980,0.980724,0.867507,0.240687,0.686694,0.970437,0.897485,0.421512,0.480513,0.237621,0.852982,0.389247,0.761658,0.738081,0.447128,0.716298,0.906307,0.883350,0.498542,0.796940,0.886244,0.645529,0.998539,0.123941,0.932418,0.341805,0.975844,0.603030,0.142478,0.594848,0.092025,0.703845,0.084207,0.758605,0.097433,0.501705,0.9…	101	123	1073	1295	na	na	0	na	na	0.269984	0.724718	1173	1195	92	3817	0	1	0	-1	0.290123	-1	FALSE
all	IARS1_A375_gRNA3171	A375	IARS1	AAATATGAACTCTGTGTGGCTTT	AAAGCCACACAGAGTTCATATTT	ENST00000443024	ATACAGAAACTTCGCAAAAAGTGCAATCTGGTTCCAACTGATGAAATCACAGTGTACTATAAAGCAAAGTCTGAAGGAACATATCTGAATAGTGTTATTGAAAGCCACACAGAGTTCATATTTACCACCATAAAGGCTCCCTTGAAACCATATCCAGTTTCTCCATCGGATAAAGTCCTTATTCAAGAAAAAACACAGTTGAAGGGATCTGAACTGGAAATTA	aacccctaccaactggtcggggtttgaaac	-12.8	((((((.(((....))).)))))).............................	-34.96	-1,-1,-1,-1,-1,-1,-1,-1,-1,-1,-1,-1,-1,-1,-1,-1,-1,-1,-1,-1,-1,0.333,0.133,0.333,0.333,0.133,0.2,0.067,0.2,0.267,0.133,0.4,0.867,0.133,0.8,0.467,0.733,0.133,0.733,0.533,1,0.6,0.533,0.867,1,0.867,0.733,0.467,0.267,0.667,0.467,0.2,0,0.533,1,0.667,0.067,0.533,1,0.933,1,0.8,0.933,0.467,0.067,0.667,0.733,0.667,0.867,0.467,0.267,0.4,0.933,1,0.267,0.4,0.6,1,0.267,0.467,1,0.933,0.333,0.333,0.533,0.4,0.46…	0.114471,0.355936,0.113349,0.695578,0.816931,0.213392,0.349710,0.291276,0.344027,0.730219,0.956088,0.013604,0.469327,0.990704,0.865122,0.030666,0.030616,0.329396,0.057137,0.146965,0.635404,0.895955,0.896354,0.974136,0.291156,0.960996,0.693552,0.872815,0.529146,0.018819,0.852436,0.002618,0.011833,0.001658,0.319088,0.001131,0.014423,0.010001,0.001134,0.816612,0.016029,0.000924,0.429039,0.040120,0.8…	101	123	3071	3293	na	na	0	na	na	0.730246	0.264455	3171	3193	92	3817	0	1	0	-1	0.826355	-1	FALSE
all	IARS1_A375_gRNA3619	A375	IARS1	GTGGCTTTGCATTCAGGAGCTGT	ACAGCTCCTGAATGCAAAGCCAC	ENST00000443024	ACTTACTGAGTCTTAGTGGAAAAACACTTTGTGTGACTGCAGGATCGGCTCCCTCTCTGATCAACAGTTCTAGTACTCTTCTTTGTCAGTATATCAACCTACAGCTCCTGAATGCAAAGCCACAAGAGTGTTTAATGGGGACAGTGGGCACTCTCCTGCTTGAAAACCCACTTGGGCAGAATGGACTCACCCACCAAGGTCTTCTGTATGAAGCAGCCAAGGT	aacccctaccaactggtcggggtttgaaac	-17.4	((((((.(((....))).))))))........((((((.......))))))..	-37.22	0.443,0.127,0.443,0.19,1,0.253,0.506,0.506,0.379,0.063,0.19,0.126,0.379,0.632,0.759,0.443,0.569,0.569,0.316,0.506,1,0.695,1,0.38,0.19,0.127,0.063,0.317,0.38,0.57,1,0.76,0.317,0.696,0.317,0,0.19,0.127,0.127,0.317,0.317,0.317,0.38,0.633,0.063,0.253,0.19,0.063,0.127,0.57,0.253,0.063,0.127,0.063,0.19,0.063,0.127,0.253,0.253,0.443,0.19,0.823,1,0.317,0.696,0.317,0.76,0.38,0.76,0.19,0.823,1,0.823,1,0.38…	0.172158,0.392574,0.129668,0.118010,0.709538,0.947186,0.013433,0.274855,0.378443,0.921387,0.941910,0.022860,0.062988,0.946042,0.150803,0.016981,0.224608,0.281862,0.157631,0.613597,0.843207,0.830658,0.854309,0.876625,0.073872,0.688906,0.695682,0.519557,0.210008,0.134479,0.077867,0.007136,0.261343,0.034839,0.893079,0.105646,0.189737,0.105525,0.004935,0.241537,0.072329,0.185669,0.562753,0.001954,0.8…	101	123	3519	3741	na	na	0	na	na	0.833449	0.161253	3619	3641	92	3817	0	1	0	-1	0.946592	-1	FALSE
all	TIMM23_A375_gRNA532	A375	TIMM23	AAGTGCCCCTTGCCTAGTCACCA	TGGTGACTAGGCAAGGGGCACTT	ENST00000580018	ACAGGGGCTGCGTTTGGTGCAATGAATGGTCTTCGGCTAGGATTGAAGGAAACCCAGAACATGGCCTGGTCCAAACCAAGAAATGTACAGATTTTGAATATGGTGACTAGGCAAGGGGCACTTTGGGCTAATACTCTAGGTTCTCTGGCTTTGCTCTATAGTGCATTTGGTGTCATCATTGAGAAAACACGAGGTGCAGAAGATGACCTTAACACAGTAGCAG	aacccctaccaactggtcggggtttgaaac	-14.3	((((((.(((....))).)))))).....((((.....))))...........	-42.17	-1,-1,-1,-1,-1,-1,-1,-1,-1,-1,-1,-1,-1,-1,-1,-1,-1,-1,-1,-1,-1,-1,-1,-1,-1,-1,-1,-1,-1,-1,-1,-1,-1,-1,-1,-1,-1,-1,-1,-1,-1,-1,-1,-1,-1,-1,-1,-1,-1,-1,-1,-1,-1,-1,-1,-1,-1,-1,-1,-1,-1,-1,-1,-1,-1,-1,-1,-1,-1,-1,-1,-1,-1,-1,-1,-1,-1,-1,-1,-1,-1,-1,-1,-1,-1,-1,-1,-1,-1,-1,-1,-1,-1,-1,-1,-1,-1,-1,-1,-1,-1,-1,-1,-1,-1,-1,-1,-1,-1,-1,-1,-1,-1,-1,-1,-1,-1,-1,-1,-1,-1,-1,-1,-1,-1,-1,-1,-1,-1,-1,-1,-1,-1,…	0.592765,0.426284,0.504971,0.055145,0.597663,0.605871,0.483799,0.815735,0.694088,0.660958,0.444408,0.716585,0.014962,0.923394,0.120436,0.000082,0.233620,0.686007,0.760089,0.917021,0.890636,0.992573,0.599827,0.940037,0.428174,0.144546,0.480012,0.970534,0.726527,0.057438,0.124071,0.331756,0.532967,0.132140,0.398800,0.413022,0.447818,0.311202,0.823160,0.000095,0.591362,0.019749,0.436979,0.145074,0.5…	101	123	432	654	na	na	0	na	na	0.434534	0.546645	532	554	177	803	0	1	0	-1	0.566188	-1	FALSE
all	TIMM23_A375_gRNA653	A375	TIMM23	ACATGCCTGTCATGGTTCCAGCT	AGCTGGAACCATGACAGGCATGT	ENST00000580018	TTTGGGCTAATACTCTAGGTTCTCTGGCTTTGCTCTATAGTGCATTTGGTGTCATCATTGAGAAAACACGAGGTGCAGAAGATGACCTTAACACAGTAGCAGCTGGAACCATGACAGGCATGTTGTATAAATGTACAGGTGGTCTTCGAGGGATAGCACGAGGTGGTCTGACAGGACTAACACTTACCAGCCTCTATGCACTATATAATAACTGGGAGCACAT	aacccctaccaactggtcggggtttgaaac	-16.9	((((((.(((....))).))))))((.(((.((((.....))))))).))...	-39.46	-1,-1,-1,-1,-1,-1,-1,-1,-1,-1,-1,-1,-1,-1,-1,-1,-1,-1,-1,-1,-1,-1,-1,-1,-1,-1,-1,-1,-1,-1,-1,-1,-1,-1,-1,-1,-1,-1,-1,-1,-1,-1,-1,-1,-1,-1,-1,-1,-1,-1,-1,-1,-1,-1,-1,-1,-1,-1,-1,-1,-1,-1,-1,-1,-1,-1,-1,-1,-1,-1,-1,-1,-1,-1,-1,-1,-1,-1,-1,-1,-1,-1,-1,-1,-1,-1,-1,-1,-1,-1,-1,-1,-1,-1,-1,-1,-1,-1,-1,-1,-1,-1,-1,-1,-1,-1,-1,-1,-1,-1,-1,-1,-1,-1,-1,-1,-1,-1,-1,-1,-1,-1,-1,-1,-1,-1,-1,-1,-1,-1,-1,-1,-1,…	0.530730,0.050812,0.420029,0.109667,0.191144,0.205236,0.143841,0.614316,0.468981,0.881162,0.022343,0.455642,0.160329,0.985721,0.462856,0.000485,0.238099,0.157541,0.763981,0.758333,0.772859,0.910955,0.199920,0.798787,0.354739,0.446100,0.048715,0.664725,0.247060,0.093954,0.193219,0.050618,0.186740,0.395352,0.366237,0.026451,0.104555,0.140837,0.469097,0.000097,0.222009,0.117602,0.274730,0.174382,0.2…	101	123	553	775	na	na	0	na	na	0.533552	0.447627	653	675	177	803	0	1	0	-1	0.759171	-1	FALSE
all	TIMM23_A375_gRNA704	A375	TIMM23	CTGTCAGACCACCTCGTGCTATC	GATAGCACGAGGTGGTCTGACAG	ENST00000580018	TCATCATTGAGAAAACACGAGGTGCAGAAGATGACCTTAACACAGTAGCAGCTGGAACCATGACAGGCATGTTGTATAAATGTACAGGTGGTCTTCGAGGGATAGCACGAGGTGGTCTGACAGGACTAACACTTACCAGCCTCTATGCACTATATAATAACTGGGAGCACATGAAAGGCTCCTTGCTCCAACAGTCACTCTGAAGATTTTGCCAACTCATGAA	aacccctaccaactggtcggggtttgaaac	-13.2	....((.(((....))).))(((((((......))))))).............	-43.03	-1,-1,-1,-1,-1,-1,-1,-1,-1,-1,-1,-1,-1,-1,-1,-1,-1,-1,-1,-1,-1,-1,-1,-1,-1,-1,-1,-1,-1,-1,-1,-1,-1,-1,-1,-1,-1,-1,-1,-1,-1,-1,-1,-1,-1,-1,-1,-1,-1,-1,-1,-1,-1,-1,-1,-1,-1,-1,-1,-1,-1,-1,-1,-1,-1,-1,-1,-1,-1,-1,-1,-1,-1,-1,-1,-1,-1,-1,-1,-1,-1,-1,-1,-1,-1,-1,-1,-1,-1,-1,-1,-1,-1,-1,-1,-1,-1,-1,-1,-1,0.667,1,0.75,1,0.5,0.583,0.25,0.333,0.667,0.167,0.417,0.333,0.167,0.083,0.083,0.083,0.25,0.083,0.66…	0.161973,0.098394,0.108174,0.019652,0.473305,0.035984,0.062537,0.475411,0.054231,0.853002,0.065669,0.019163,0.190874,0.534427,0.478586,0.020747,0.385985,0.120034,0.587122,0.595736,0.680030,0.797213,0.524038,0.820168,0.427817,0.329704,0.582268,0.518650,0.322599,0.021115,0.051369,0.262483,0.758310,0.236301,0.003399,0.066138,0.074532,0.062584,0.002301,0.033814,0.043468,0.046282,0.145207,0.045019,0.6…	101	123	604	826	na	na	0	na	na	0.575286	0.405892	704	726	177	803	0	1	0	-1	0.84051	-1	FALSE
all	TIMM23_A375_gRNA777	A375	TIMM23	GACTGTTGGAGCAAGGAGCCTTT	AAAGGCTCCTTGCTCCAACAGTC	ENST00000580018	GTATAAATGTACAGGTGGTCTTCGAGGGATAGCACGAGGTGGTCTGACAGGACTAACACTTACCAGCCTCTATGCACTATATAATAACTGGGAGCACATGAAAGGCTCCTTGCTCCAACAGTCACTCTGAAGATTTTGCCAACTCATGAATGGAGGACACTTCAGTAGTCATCTAGATCCTTTTATAAGACAGTTTGGAGTTATTCTCTCTCTTCTACCTACA	aacccctaccaactggtcggggtttgaaac	-14	..((.((.(((((.(((((..........))))))))))))...)).......	-39.98	-1,-1,-1,-1,-1,-1,-1,-1,-1,-1,-1,-1,-1,-1,-1,-1,-1,-1,-1,-1,-1,-1,-1,-1,-1,-1,-1,0.667,1,0.75,1,0.5,0.583,0.25,0.333,0.667,0.167,0.417,0.333,0.167,0.083,0.083,0.083,0.25,0.083,0.667,0.25,0.25,0.083,0,0.083,0.167,0.417,0.083,0.583,0.583,0,0.167,0.167,0.167,0.333,0.25,0,0,0.167,0.083,0.083,0.167,0,0.083,0.417,0.333,0.166,0.248,0.083,-1,0.166,0.247,0.823,0.247,0.411,0.411,1,1,1,0.982,0.573,0.082,0.3…	0.002963,0.010385,0.037033,0.224350,0.920315,0.017286,0.050833,0.355792,0.010775,0.446894,0.466548,0.000129,0.013138,0.892389,0.267683,0.153359,0.186440,0.409988,0.091093,0.026418,0.816690,0.528305,0.141376,0.578402,0.009909,0.546460,0.412849,0.374450,0.141255,0.087974,0.001106,0.000041,0.196918,0.005735,0.001814,0.002205,0.005008,0.037646,0.002333,0.097507,0.025702,0.002330,0.249231,0.000265,0.3…	101	123	677	899	na	na	0	na	na	0.635025	0.346154	777	799	177	803	0	1	0	-1	0.956938	-1	FALSE
all	TIMM23_A375_gRNA793	A375	TIMM23	GCAAAATCTTCAGAGTGACTGTT	AACAGTCACTCTGAAGATTTTGC	ENST00000580018	GGTCTTCGAGGGATAGCACGAGGTGGTCTGACAGGACTAACACTTACCAGCCTCTATGCACTATATAATAACTGGGAGCACATGAAAGGCTCCTTGCTCCAACAGTCACTCTGAAGATTTTGCCAACTCATGAATGGAGGACACTTCAGTAGTCATCTAGATCCTTTTATAAGACAGTTTGGAGTTATTCTCTCTCTTCTACCTACAATTAGTTTGAAAAATT	aacccctaccaactggtcggggtttgaaac	-13.1	((((((.(((....))).))))))................(((.....)))..	-34.9	-1,-1,-1,-1,-1,-1,-1,-1,-1,-1,-1,0.667,1,0.75,1,0.5,0.583,0.25,0.333,0.667,0.167,0.417,0.333,0.167,0.083,0.083,0.083,0.25,0.083,0.667,0.25,0.25,0.083,0,0.083,0.167,0.417,0.083,0.583,0.583,0,0.167,0.167,0.167,0.333,0.25,0,0,0.167,0.083,0.083,0.167,0,0.083,0.417,0.333,0.166,0.248,0.083,-1,0.166,0.247,0.823,0.247,0.411,0.411,1,1,1,0.982,0.573,0.082,0.328,0.164,0,0,0,0,0.082,0.246,0.164,0.493,0.411,0…	0.013446,0.033073,0.087282,0.907211,0.951724,0.037503,0.086693,0.451523,0.028917,0.749777,0.804400,0.001529,0.053933,0.983687,0.325952,0.153316,0.137965,0.288224,0.062505,0.073786,0.860653,0.457117,0.302574,0.614257,0.063234,0.668553,0.532456,0.101007,0.148648,0.333736,0.016761,0.000054,0.535641,0.002789,0.039474,0.001547,0.003253,0.420527,0.007765,0.203172,0.043378,0.020225,0.277763,0.001579,0.3…	101	123	693	915	na	na	0	na	na	0.648118	0.333061	793	815	177	803	0	1	0	-1	0.982456	-1	FALSE
all	TIMM23_A375_gRNA798	A375	TIMM23	AGTTGGCAAAATCTTCAGAGTGA	TCACTCTGAAGATTTTGCCAACT	ENST00000580018	TCGAGGGATAGCACGAGGTGGTCTGACAGGACTAACACTTACCAGCCTCTATGCACTATATAATAACTGGGAGCACATGAAAGGCTCCTTGCTCCAACAGTCACTCTGAAGATTTTGCCAACTCATGAATGGAGGACACTTCAGTAGTCATCTAGATCCTTTTATAAGACAGTTTGGAGTTATTCTCTCTCTTCTACCTACAATTAGTTTGAAAAATTGGAGA	aacccctaccaactggtcggggtttgaaac	-13.4	.(((((.(((....))).)))))(((((...(((.....))).))))).....	-37.2	-1,-1,-1,-1,-1,-1,0.667,1,0.75,1,0.5,0.583,0.25,0.333,0.667,0.167,0.417,0.333,0.167,0.083,0.083,0.083,0.25,0.083,0.667,0.25,0.25,0.083,0,0.083,0.167,0.417,0.083,0.583,0.583,0,0.167,0.167,0.167,0.333,0.25,0,0,0.167,0.083,0.083,0.167,0,0.083,0.417,0.333,0.166,0.248,0.083,-1,0.166,0.247,0.823,0.247,0.411,0.411,1,1,1,0.982,0.573,0.082,0.328,0.164,0,0,0,0,0.082,0.246,0.164,0.493,0.411,0.657,0.575,0.90…	0.013275,0.027608,0.054675,0.677712,0.691567,0.038626,0.007622,0.404488,0.017877,0.762145,0.623927,0.000587,0.046818,0.965922,0.411213,0.125988,0.179558,0.202680,0.020672,0.062070,0.823283,0.424374,0.090256,0.756807,0.041777,0.682020,0.306963,0.064342,0.195406,0.156426,0.014313,0.000077,0.250645,0.006787,0.012536,0.006704,0.002215,0.332687,0.007626,0.441249,0.117694,0.018694,0.064248,0.002171,0.3…	101	123	698	920	na	na	0	na	na	0.652209	0.328969	798	820	177	803	0	1	0	-1	0.990431	-1	FALSE
all	YJU2_A375_gRNA201	A375	YJU2	TTGTAGATGTATTCTCCGCACGT	ACGTGCGGAGAATACATCTACAA	ENST00000262962	CCCGCCGGACTTTGACCCATCAAAGATCCCCAAACTCAAGCTCCCCAAAGACCGGCAGTACGTGGTGCGGCTGATGGCCCCCTTCAACATGAGGTGTAAGACGTGCGGAGAATACATCTACAAGGGGAAGAAATTCAATGCTCGGAAGGAGACGGTGCAGAACGAGGTCTACCTGGGCCTGCCCATCTTCCGCTTTTACATCAAGTGCACGCGCTGCCTGGCA	aacccctaccaactggtcggggtttgaaac	-14.4	((((((.(((....))).))))))....((.((((((.....)))..))).))	-36.18	-1,-1,-1,-1,-1,-1,-1,-1,-1,-1,-1,-1,-1,-1,-1,-1,-1,-1,-1,-1,-1,-1,-1,-1,-1,-1,-1,-1,-1,-1,-1,-1,-1,-1,-1,-1,-1,-1,-1,-1,0,0.25,0,-1,-1,-1,0.125,-1,1,1,1,0.125,0.125,0.25,0.375,0.375,0.5,1,0.5,0.75,0.375,0.5,0.875,1,1,0.75,0.125,0.75,0.375,0.5,0.375,0.125,1,1,0.25,0.875,0.25,0,0,0.125,0,0.625,0.375,0.625,0.75,1,0.875,0.5,1,1,0,0,0,0.441,0.441,0.587,0.734,0.147,0.44,0.44,0.437,0,0.583,0.583,0.146,0…	0.083798,0.110861,0.026351,0.383229,0.894804,0.020766,0.047181,0.032362,0.065663,0.993623,0.021229,0.013895,0.148275,0.996925,0.984921,0.342698,0.005263,0.071190,0.627560,0.088974,0.375469,0.624223,0.044234,0.340287,0.982979,0.958151,0.494825,0.021479,0.810029,0.732098,0.807386,0.016060,0.123184,0.006793,0.041081,0.002341,0.004838,0.084967,0.004815,0.010979,0.166719,0.339747,0.099967,0.275020,0.8…	101	123	101	323	na	na	0	na	na	0.13947	0.844491	201	223	69	1037	0	1	0	-1	0.136223	-1	FALSE
all	YJU2_A375_gRNA236	A375	YJU2	GCACCGTCTCCTTCCGAGCATTG	CAATGCTCGGAAGGAGACGGTGC	ENST00000262962	TCAAGCTCCCCAAAGACCGGCAGTACGTGGTGCGGCTGATGGCCCCCTTCAACATGAGGTGTAAGACGTGCGGAGAATACATCTACAAGGGGAAGAAATTCAATGCTCGGAAGGAGACGGTGCAGAACGAGGTCTACCTGGGCCTGCCCATCTTCCGCTTTTACATCAAGTGCACGCGCTGCCTGGCAGAGATCACCTTCAAGACAGACCCTGAAAACACAGA	aacccctaccaactggtcggggtttgaaac	-13.8	((((((.(((....))).))))))...........(.(((.....))))....	-41.48	-1,-1,-1,-1,-1,0,0.25,0,-1,-1,-1,0.125,-1,1,1,1,0.125,0.125,0.25,0.375,0.375,0.5,1,0.5,0.75,0.375,0.5,0.875,1,1,0.75,0.125,0.75,0.375,0.5,0.375,0.125,1,1,0.25,0.875,0.25,0,0,0.125,0,0.625,0.375,0.625,0.75,1,0.875,0.5,1,1,0,0,0,0.441,0.441,0.587,0.734,0.147,0.44,0.44,0.437,0,0.583,0.583,0.146,0.29,0.579,0.145,0.989,0.434,0.72,0.856,0.288,0.432,0.288,0.286,0.143,0,0.286,0.98,0.57,0.428,0,0.143,0,0.…	0.031804,0.138616,0.084635,0.291163,0.787364,0.342075,0.074486,0.192772,0.044674,0.987278,0.067039,0.056270,0.561411,0.981480,0.925170,0.451390,0.001616,0.225405,0.637874,0.045967,0.567092,0.730475,0.108277,0.486156,0.189128,0.489079,0.456713,0.133240,0.131781,0.239009,0.351242,0.215371,0.588162,0.009800,0.096447,0.001708,0.002117,0.059829,0.011417,0.042990,0.010052,0.546663,0.054357,0.227015,0.7…	101	123	136	358	na	na	0	na	na	0.163877	0.820084	236	258	69	1037	0	1	0	-1	0.172343	-1	FALSE
all	YJU2_A375_gRNA252	A375	YJU2	AGGTAGACCTCGTTCTGCACCGT	ACGGTGCAGAACGAGGTCTACCT	ENST00000262962	CCGGCAGTACGTGGTGCGGCTGATGGCCCCCTTCAACATGAGGTGTAAGACGTGCGGAGAATACATCTACAAGGGGAAGAAATTCAATGCTCGGAAGGAGACGGTGCAGAACGAGGTCTACCTGGGCCTGCCCATCTTCCGCTTTTACATCAAGTGCACGCGCTGCCTGGCAGAGATCACCTTCAAGACAGACCCTGAAAACACAGACTACACCATGGAGCAT	aacccctaccaactggtcggggtttgaaac	-17	((((((.(((....))).))))))........(((((......))))).....	-38.27	0.125,0.125,0.25,0.375,0.375,0.5,1,0.5,0.75,0.375,0.5,0.875,1,1,0.75,0.125,0.75,0.375,0.5,0.375,0.125,1,1,0.25,0.875,0.25,0,0,0.125,0,0.625,0.375,0.625,0.75,1,0.875,0.5,1,1,0,0,0,0.441,0.441,0.587,0.734,0.147,0.44,0.44,0.437,0,0.583,0.583,0.146,0.29,0.579,0.145,0.989,0.434,0.72,0.856,0.288,0.432,0.288,0.286,0.143,0,0.286,0.98,0.57,0.428,0,0.143,0,0.284,0,0.709,0.568,0.142,0.141,0.283,0.141,0.424,…	0.088731,0.424681,0.121788,0.073676,0.674405,0.590869,0.076232,0.237091,0.056352,0.925642,0.033803,0.122400,0.226604,0.943802,0.778052,0.372555,0.014081,0.297096,0.228372,0.033523,0.423569,0.702043,0.088364,0.523603,0.022168,0.134427,0.421249,0.072552,0.065521,0.023620,0.091181,0.144239,0.464846,0.015571,0.057743,0.010558,0.000495,0.160148,0.018045,0.007494,0.010957,0.141692,0.049186,0.073923,0.4…	101	123	152	374	na	na	0	na	na	0.175035	0.808926	252	274	69	1037	0	1	0	-1	0.188854	-1	FALSE
all	YJU2_A375_gRNA304	A375	YJU2	CTCTGCCAGGCAGCGCGTGCACT	AGTGCACGCGCTGCCTGGCAGAG	ENST00000262962	TGCGGAGAATACATCTACAAGGGGAAGAAATTCAATGCTCGGAAGGAGACGGTGCAGAACGAGGTCTACCTGGGCCTGCCCATCTTCCGCTTTTACATCAAGTGCACGCGCTGCCTGGCAGAGATCACCTTCAAGACAGACCCTGAAAACACAGACTACACCATGGAGCATGGAGCCACGCGGAATTTCCAGGCTGAGAAGCTCCTGGAGGAGGAGGAGAAGA	aacccctaccaactggtcggggtttgaaac	-17.3	((((((.(((....))).))))))....(((.((((...)))).).)).....	-43.39	0.583,0.146,0.29,0.579,0.145,0.989,0.434,0.72,0.856,0.288,0.432,0.288,0.286,0.143,0,0.286,0.98,0.57,0.428,0,0.143,0,0.284,0,0.709,0.568,0.142,0.141,0.283,0.141,0.424,0.283,0.281,0.422,0.281,0.281,0,0.563,0.141,0,0.141,0.704,0.422,0.141,0.141,0.704,0.141,0.704,0.281,0.281,0,0.141,-1,-1,-1,-1,-1,-1,-1,-1,-1,-1,-1,-1,-1,-1,-1,-1,-1,-1,-1,-1,-1,-1,-1,-1,-1,-1,-1,-1,-1,-1,0.141,0,0.141,0.281,0,0.141,0…	0.035019,0.205610,0.263183,0.031945,0.817118,0.540055,0.032851,0.636651,0.035241,0.917753,0.197838,0.045551,0.105168,0.485329,0.601568,0.249961,0.054925,0.198628,0.552799,0.012823,0.315167,0.751430,0.146719,0.904038,0.005110,0.058464,0.251010,0.115706,0.079582,0.036552,0.273084,0.230798,0.104235,0.023854,0.474518,0.002439,0.000332,0.176122,0.260374,0.062777,0.010273,0.124804,0.037142,0.050696,0.5…	101	123	204	426	na	na	0	na	na	0.211297	0.772664	304	326	69	1037	0	1	0	-1	0.242518	-1	FALSE
all	YJU2_A375_gRNA339	A375	YJU2	TAGTCTGTGTTTTCAGGGTCTGT	ACAGACCCTGAAAACACAGACTA	ENST00000262962	TGCTCGGAAGGAGACGGTGCAGAACGAGGTCTACCTGGGCCTGCCCATCTTCCGCTTTTACATCAAGTGCACGCGCTGCCTGGCAGAGATCACCTTCAAGACAGACCCTGAAAACACAGACTACACCATGGAGCATGGAGCCACGCGGAATTTCCAGGCTGAGAAGCTCCTGGAGGAGGAGGAGAAGAGGGTGCAGAAGGAGCGGGAGGACGAGGAGCTGAAC	aacccctaccaactggtcggggtttgaaac	-17.7	((((((.(((....))).))))))......(((.((.((....)).)).))).	-34.01	0.281,0,0.563,0.141,0,0.141,0.704,0.422,0.141,0.141,0.704,0.141,0.704,0.281,0.281,0,0.141,-1,-1,-1,-1,-1,-1,-1,-1,-1,-1,-1,-1,-1,-1,-1,-1,-1,-1,-1,-1,-1,-1,-1,-1,-1,-1,-1,-1,-1,-1,0.141,0,0.141,0.281,0,0.141,0.141,0.281,0,0.141,0.964,1,0.832,0.832,0.416,0.413,0.413,1,1,1,0.824,0.824,0.275,0.275,0.412,0.686,0.137,0.411,0.411,0,0.137,0,0.958,0.411,0.821,0.273,0.137,0.41,0.957,0.547,0.955,1,0.273,0.…	0.073992,0.041940,0.113263,0.017781,0.573399,0.267164,0.018739,0.300598,0.062298,0.957700,0.028716,0.006742,0.152869,0.773945,0.468721,0.111225,0.079565,0.124327,0.570342,0.031454,0.349186,0.721958,0.090573,0.461042,0.009450,0.432940,0.117206,0.056959,0.050847,0.122483,0.119228,0.004789,0.004622,0.024097,0.165438,0.000907,0.000713,0.001099,0.053359,0.232287,0.006111,0.592703,0.001818,0.007923,0.6…	101	123	239	461	na	na	0	na	na	0.235704	0.748257	339	361	69	1037	0	1	0	-1	0.278638	-1	FALSE
all	YJU2_A375_gRNA678	A375	YJU2	GAGTCCTCCAGCAGTCTTCGCTT	AAGCGAAGACTGCTGGAGGACTC	ENST00000262962	GGCTATGCTGAGGCAGCACCGCCTGTCGGAGGAGGAGCGGCGGAGGCAGCAGCAGGAGGAGGACGAGCAGGAGACCGCGGCCCTGTTGGAGGAAGCCAGAAAGCGAAGACTGCTGGAGGACTCCGACTCAGAGGATGAGGCTGCTCCCTCGCCCCTGCAGCCAGCCCTTCGGCCCAACCCCACCGCCATCCTGGATGAGGCCCCAAAGCCCAAGAGGAAGGTG	aacccctaccaactggtcggggtttgaaac	-13.9	((((((.(((....))).))))))...............(((.......))).	-42.02	0.261,0.261,0.261,0,1,0.654,0.261,0,0,0.523,0.906,0.392,0.131,0,1,0.131,1,0.784,0.261,0.131,0.131,0,0,0.654,0.392,0.654,0.523,1,1,0.131,0.131,1,1,0.261,0.988,1,0.392,0.261,0.523,0,0.131,0,0.654,0.523,0.392,0.392,0.392,0.131,0,0.392,0,0,0,0,0,0.392,0.131,0.131,0.131,0,0,0.523,0.392,0.131,0.392,0.261,0,0.523,0,0.261,0,0.392,0.392,0.261,0,-1,-1,-1,-1,-1,-1,-1,-1,-1,-1,-1,-1,-1,-1,-1,-1,-1,-1,-1,-1,-…	0.665255,0.513727,0.769280,0.326082,0.273987,0.730964,0.515037,0.715395,0.443637,0.618380,0.025447,0.475455,0.070263,0.951249,0.461444,0.000953,0.028611,0.363158,0.769641,0.901079,0.708692,0.866831,0.208043,0.767070,0.223319,0.096087,0.117752,0.016743,0.828688,0.614793,0.048591,0.044819,0.590201,0.315533,0.601283,0.047282,0.059404,0.016578,0.730966,0.002410,0.234415,0.022599,0.144817,0.100742,0.5…	101	123	578	800	na	na	0	na	na	0.472106	0.511855	678	700	69	1037	0	1	0	-1	0.628483	-1	FALSE
all	HNRNPU_A375_gRNA1138	A375	HNRNPU	GGAAGAAGCACTGAGACGATCTC	GAGATCGTCTCAGTGCTTCTTCC	ENST00000640218	AAATCTCCTCAGCCACCTGTTGAAGAAGAAGATGAACACTTCGATGACACAGTGGTTTGTCTTGATACTTATAATTGTGATCTACATTTTAAAATATCAAGAGATCGTCTCAGTGCTTCTTCCCTTACAATGGAGAGTTTTGCTTTTCTTTGGGCTGGAGGAAGAGCATCCTATGGTGTGTCAAAAGGCAAAGTGTGTTTTGAGATGAAGGTTACAGAGAAGA	aacccctaccaactggtcggggtttgaaac	-13.8	((((((.(((....))).))))))..................((((...))))	-39.4	-1,-1,-1,-1,-1,-1,-1,-1,-1,-1,-1,-1,-1,-1,-1,-1,-1,-1,-1,-1,-1,-1,-1,-1,-1,-1,-1,-1,-1,-1,-1,-1,-1,-1,-1,-1,-1,-1,-1,-1,-1,-1,-1,-1,-1,-1,-1,-1,-1,-1,-1,-1,-1,-1,-1,-1,-1,-1,-1,-1,-1,-1,-1,-1,-1,-1,-1,-1,-1,-1,-1,-1,-1,-1,-1,-1,-1,-1,-1,-1,-1,-1,-1,-1,-1,-1,-1,-1,-1,-1,-1,-1,-1,-1,-1,-1,-1,-1,-1,-1,-1,-1,-1,-1,-1,-1,-1,-1,-1,-1,-1,-1,-1,-1,-1,-1,-1,-1,-1,-1,-1,-1,-1,-1,-1,-1,-1,-1,-1,0.824,0.36,0…	0.182307,0.118189,0.273210,0.222688,0.554010,0.866846,0.072019,0.781565,0.790427,0.486332,0.494819,0.265285,0.006965,0.892640,0.067957,0.070396,0.428452,0.482153,0.227203,0.407214,0.854928,0.997457,0.710590,0.954135,0.143537,0.129555,0.533688,0.956018,0.750338,0.029115,0.735416,0.106319,0.313697,0.023995,0.697217,0.026274,0.331159,0.146486,0.170003,0.032686,0.404027,0.053310,0.140278,0.065087,0.1…	101	123	1038	1260	na	na	0	na	na	0.165792	0.830854	1138	1160	231	2705	0	1	0	-1	0.366465	-1	FALSE
all	HNRNPU_A375_gRNA1141	A375	HNRNPU	AAGGGAAGAAGCACTGAGACGAT	ATCGTCTCAGTGCTTCTTCCCTT	ENST00000640218	TCTCCTCAGCCACCTGTTGAAGAAGAAGATGAACACTTCGATGACACAGTGGTTTGTCTTGATACTTATAATTGTGATCTACATTTTAAAATATCAAGAGATCGTCTCAGTGCTTCTTCCCTTACAATGGAGAGTTTTGCTTTTCTTTGGGCTGGAGGAAGAGCATCCTATGGTGTGTCAAAAGGCAAAGTGTGTTTTGAGATGAAGGTTACAGAGAAGATCC	aacccctaccaactggtcggggtttgaaac	-12.8	((((((.(((....))).)))))).............................	-41.77	-1,-1,-1,-1,-1,-1,-1,-1,-1,-1,-1,-1,-1,-1,-1,-1,-1,-1,-1,-1,-1,-1,-1,-1,-1,-1,-1,-1,-1,-1,-1,-1,-1,-1,-1,-1,-1,-1,-1,-1,-1,-1,-1,-1,-1,-1,-1,-1,-1,-1,-1,-1,-1,-1,-1,-1,-1,-1,-1,-1,-1,-1,-1,-1,-1,-1,-1,-1,-1,-1,-1,-1,-1,-1,-1,-1,-1,-1,-1,-1,-1,-1,-1,-1,-1,-1,-1,-1,-1,-1,-1,-1,-1,-1,-1,-1,-1,-1,-1,-1,-1,-1,-1,-1,-1,-1,-1,-1,-1,-1,-1,-1,-1,-1,-1,-1,-1,-1,-1,-1,-1,-1,-1,-1,-1,-1,0.824,0.36,0.309,0.46…	0.274811,0.098483,0.181449,0.259656,0.548756,0.928729,0.058572,0.710509,0.807640,0.511736,0.708572,0.310071,0.008647,0.897084,0.057464,0.047536,0.264563,0.498178,0.444550,0.378219,0.825374,0.997072,0.643812,0.954002,0.203794,0.203308,0.643209,0.951188,0.790947,0.023794,0.647261,0.130850,0.340614,0.025084,0.813055,0.032062,0.350170,0.205399,0.124569,0.044940,0.329767,0.104500,0.161973,0.156499,0.2…	101	123	1041	1263	na	na	0	na	na	0.166229	0.830417	1141	1163	231	2705	0	1	0	-1	0.367677	-1	FALSE
all	HNRNPU_A375_gRNA1257	A375	HNRNPU	TATAAATGCCTTACTGGGATCTT	AAGATCCCAGTAAGGCATTTATA	ENST00000640218	TTCCCTTACAATGGAGAGTTTTGCTTTTCTTTGGGCTGGAGGAAGAGCATCCTATGGTGTGTCAAAAGGCAAAGTGTGTTTTGAGATGAAGGTTACAGAGAAGATCCCAGTAAGGCATTTATATACAAAAGATATTGACATACATGAAGTTCGTATTGGCTGGTCACTAACTACAAGTGGAATGTTACTTGGTGAAGAAGAATTTTCTTATGGGTATTCTCTA	aacccctaccaactggtcggggtttgaaac	-15.2	((((((.(((....))).))))))...........((.((.....)).))...	-31.74	-1,-1,-1,-1,-1,-1,-1,-1,-1,-1,0.824,0.36,0.309,0.463,0.515,0.36,0.938,0.463,0.36,0.721,0.868,0.824,0,0.206,0.206,0.103,0.206,0.103,0.051,0.257,0.36,0.103,0.257,0.154,0.515,0.772,0.154,0.566,0.412,0.257,0.051,0.206,0.463,0.051,0.566,0.36,0.154,0.257,0.515,0.412,0.309,0.515,0.964,1,0.824,0.802,0.989,0.894,0.301,1,0.782,0.635,0.92,1,0.83,1,0.716,0.43,0.764,0.621,1,1,1,1,0.888,1,0.558,0.326,0.465,0.5…	0.862535,0.574178,0.653084,0.583661,0.865473,0.546061,0.530523,0.929027,0.987178,0.924546,0.777270,0.954128,0.261833,0.994104,0.734408,0.030187,0.676831,0.775234,0.876912,0.973718,0.944994,0.990488,0.882164,0.948553,0.913897,0.992307,0.926355,0.988044,0.918343,0.376209,0.553147,0.264068,0.538357,0.050654,0.972991,0.055341,0.810608,0.292525,0.405315,0.018423,0.832968,0.007531,0.675667,0.620616,0.5…	101	123	1157	1379	na	na	0	na	na	0.183144	0.813502	1257	1279	231	2705	0	1	0	-1	0.414545	-1	FALSE
all	HNRNPU_A375_gRNA1517	A375	HNRNPU	CCTTACTGATTTTGAAGGCAACG	CGTTGCCTTCAAAATCAGTAAGG	ENST00000640218	ATGGAGAAAAGTTTGATGAAAATGATGTGATTACATGTTTTGCTAACTTTGAAAGTGATGAAGTAGAACTCTCGTATGCTAAGAATGGACAAGATCTTGGCGTTGCCTTCAAAATCAGTAAGGAAGTTCTTGCTGGACGGCCACTGTTCCCGCATGTTCTCTGCCACAACTGTGCAGTTGAATTTAATTTTGGTCAGAAGGAAAAGCCATATTTTCCAATACC	aacccctaccaactggtcggggtttgaaac	-14.5	((((((.(((....))).))))))......((((.(.......))))).....	-34.9	0.359,0.04,0.08,0.12,0.159,0.04,0.279,0.159,0.12,0.319,0.04,0.199,0.159,0.12,0.12,0.159,0.319,0.159,0.438,0.558,0.199,0.319,0.239,0.239,0.199,0.319,0.08,0.08,0.319,0.956,0.518,1,0.239,0.398,0.398,0.477,0.238,0.119,0.119,0.397,0.357,0.357,0.634,0,0.293,0.244,0.244,0.293,0.293,0.391,0.787,0.663,1,0.54,0.193,0.367,0.193,0.218,0.193,0.243,0.417,0.119,0.119,0.268,0.193,0.218,0.541,0.168,0.193,0,0.142,…	0.546251,0.325218,0.660342,0.485162,0.871219,0.740202,0.029809,0.826657,0.961748,0.968363,0.777323,0.096030,0.743096,0.949378,0.292515,0.063564,0.667134,0.379516,0.274830,0.239378,0.935016,0.737320,0.671339,0.284735,0.988825,0.692320,0.589726,0.843907,0.885479,0.094488,0.898314,0.742384,0.419693,0.012782,0.902661,0.013423,0.062917,0.925231,0.401228,0.038617,0.596815,0.325858,0.049852,0.220082,0.8…	101	123	1417	1639	na	na	0	na	na	0.221056	0.775591	1517	1539	231	2705	0	1	0	-1	0.519596	-1	FALSE
all	HNRNPU_A375_gRNA1779	A375	HNRNPU	TTCCCTGGATTTTCTGCTGCATG	CATGCAGCAGAAAATCCAGGGAA	ENST00000640218	TCGAGTTAGAGGACCAAAGGGGCCTGAAGAGAAGAAAGATTGTGAAGTTGTGATGATGATTGGCTTGCCAGGAGCTGGAAAAACTACCTGGGTTACTAAACATGCAGCAGAAAATCCAGGGAAATATAACATTCTTGGCACAAATACTATTATGGATAAGATGATGGTGGCAGGTTTTAAGAAGCAAATGGCAGATACTGGAAAACTGAACACACTGTTGCAG	aacccctaccaactggtcggggtttgaaac	-13.7	((((((.(((....))).)))))).((((.(((...))).)))).........	-41.48	0.48,0.251,0.934,0.582,0.934,0.952,1,0.787,0.72,0.389,0.389,0.257,0.159,0.092,0.193,0.594,0.727,0.162,0.027,0.094,0.094,0.195,0.198,0.096,0.164,0.709,0.641,0.442,0.373,0.477,0.201,0.545,0.514,0.272,0.618,0.895,0.445,0.31,0.449,0.483,0.997,0.553,0.452,0.835,1,0,-1,-1,-1,-1,-1,-1,-1,-1,-1,-1,-1,-1,-1,-1,-1,-1,-1,-1,-1,-1,-1,-1,-1,-1,-1,-1,-1,-1,-1,-1,-1,-1,-1,-1,-1,-1,-1,-1,-1,-1,-1,-1,-1,-1,-1,-1,…	0.953048,0.261416,0.721198,0.554822,0.956667,0.386281,0.086014,0.772688,0.525119,0.995236,0.880756,0.184413,0.032301,0.998226,0.744325,0.415119,0.780069,0.476257,0.869907,0.287234,0.828231,0.952139,0.662528,0.843951,0.977903,0.853268,0.368918,0.936845,0.936356,0.419712,0.553866,0.089167,0.267274,0.076013,0.738642,0.041043,0.153684,0.437088,0.035385,0.206707,0.087699,0.229326,0.735636,0.082815,0.5…	101	123	1679	1901	na	na	0	na	na	0.259259	0.737387	1779	1801	231	2705	0	1	0	-1	0.625455	-1	FALSE
all	HNRNPU_A375_gRNA2545	A375	HNRNPU	TCTGTTGGGCATTCCACCTCTGT	ACAGAGGTGGAATGCCCAACAGA	ENST00000640218	AGAGGTGGTGGCGGTGGAGGAAGTGGTGGAATCGGCTATCCATACCCTCGTGCCCCTGTTTTTCCTGGCCGTGGTAGTTACTCAAACAGAGGGAACTACAACAGAGGTGGAATGCCCAACAGAGGGAACTACAACCAGAACTTCAGAGGACGAGGAAACAATCGTGGCTACAAAAATCAATCTCAGGGCTACAACCAGTGGCAGCAGGGTCAATTCTGGGGTC	aacccctaccaactggtcggggtttgaaac	-14.3	((((((.(((....))).))))))............((........)).....	-39.76	0.584,0.88,0.623,0.8,0.847,0.273,0.467,0.039,0.273,0.117,0,0.117,0.156,0.273,0.428,0.88,0.117,0,0,0.195,0,0.234,0.078,0.195,0.273,0.039,0.117,0.078,0.506,0.584,0.389,0.117,0.195,0.273,0.117,0.078,0.584,0.74,0.701,0.195,0.273,0.919,0.771,0.74,0.428,0.156,0.078,0.039,0.195,0.428,0.273,0.195,0.117,0.039,0.039,0.35,0.421,0.306,0.306,0.268,0.65,0.91,0.338,0.15,0.747,0.15,0.66,0.841,0.403,0.822,0.587,0…	0.993626,0.738917,0.584459,0.938750,0.942373,0.187611,0.530516,0.430150,0.953348,0.996455,0.595780,0.335302,0.361110,0.995033,0.989656,0.241972,0.941183,0.912194,0.569098,0.467592,0.696059,0.675687,0.526379,0.966242,0.990796,0.999374,0.955501,0.952168,0.667591,0.111353,0.988463,0.970605,0.477330,0.017643,0.873919,0.012675,0.643830,0.060159,0.218270,0.593071,0.487649,0.954240,0.370537,0.319187,0.8…	101	123	2445	2667	na	na	0	na	na	0.370954	0.625693	2545	2567	231	2705	0	1	0	-1	0.934949	-1	FALSE
all	RPS28_A375_gRNA117	A375	RPS28	GTCCATGAATTCCACGCGCACCT	AGGTGCGCGTGGAATTCATGGAC	ENST00000600659	CGCCGCGCCGCCATCATGGACACCAGCCGTGTGCAGCCTATCAAGCTGGCCAGGGTCACCAAGGTCCTGGGCAGGACCGGTTCTCAGGGACAGTGCACGCAGGTGCGCGTGGAATTCATGGACGACACGAGCCGATCCATCATCCGCAATGTAAAAGGCCCCGTGCGCGAGGGCGACGTGCTCACCCTTTTGGAGTCAGAGCGAGAAGCCCGGAGGTTGCGCT	aacccctaccaactggtcggggtttgaaac	-13	((((((.(((....))).)))))).....(((...((.....)).))).....	-41.87	-1,-1,-1,-1,-1,-1,-1,-1,-1,-1,-1,-1,-1,-1,-1,-1,-1,-1,-1,-1,-1,-1,-1,-1,-1,-1,-1,-1,-1,-1,-1,-1,-1,-1,-1,-1,-1,-1,-1,-1,-1,-1,-1,-1,-1,-1,-1,-1,-1,-1,-1,-1,-1,-1,-1,-1,-1,-1,-1,-1,-1,-1,-1,-1,0.15,0.057,0.1,0.086,0.722,1,1,1,0.382,0.374,1,1,0.439,0.621,0.787,0.567,1,0.869,0.763,0.469,0.987,0.217,0.254,0.497,1,0.944,0.977,0.818,0.053,0.079,0.026,0.079,0.053,0.053,0.105,0.026,0.053,0.026,0,0.056,0,…	0.857171,0.961235,0.876214,0.027473,0.782280,0.661897,0.603938,0.096140,0.945389,0.983790,0.997151,0.980321,0.898334,0.496380,0.874152,0.029795,0.010061,0.264830,0.153784,0.033222,0.842733,0.455977,0.274669,0.325919,0.992197,0.323079,0.611485,0.256063,0.259983,0.113198,0.999962,0.997805,0.899356,0.100721,0.995004,0.407212,0.768878,0.950526,0.348067,0.111914,0.923337,0.185638,0.163061,0.980979,0.5…	101	123	17	239	na	na	0	na	na	0.0874811	0.895173	117	139	32	238	0	1	0	-1	0.410628	-1	FALSE
all	RPS28_A375_gRNA120	A375	RPS28	GTCGTCCATGAATTCCACGCGCA	TGCGCGTGGAATTCATGGACGAC	ENST00000600659	CGCGCCGCCATCATGGACACCAGCCGTGTGCAGCCTATCAAGCTGGCCAGGGTCACCAAGGTCCTGGGCAGGACCGGTTCTCAGGGACAGTGCACGCAGGTGCGCGTGGAATTCATGGACGACACGAGCCGATCCATCATCCGCAATGTAAAAGGCCCCGTGCGCGAGGGCGACGTGCTCACCCTTTTGGAGTCAGAGCGAGAAGCCCGGAGGTTGCGCTGAG	aacccctaccaactggtcggggtttgaaac	-14	((((((.(((....))).)))))).....((.(((...........)))))..	-39.57	-1,-1,-1,-1,-1,-1,-1,-1,-1,-1,-1,-1,-1,-1,-1,-1,-1,-1,-1,-1,-1,-1,-1,-1,-1,-1,-1,-1,-1,-1,-1,-1,-1,-1,-1,-1,-1,-1,-1,-1,-1,-1,-1,-1,-1,-1,-1,-1,-1,-1,-1,-1,-1,-1,-1,-1,-1,-1,-1,-1,-1,0.15,0.057,0.1,0.086,0.722,1,1,1,0.382,0.374,1,1,0.439,0.621,0.787,0.567,1,0.869,0.763,0.469,0.987,0.217,0.254,0.497,1,0.944,0.977,0.818,0.053,0.079,0.026,0.079,0.053,0.053,0.105,0.026,0.053,0.026,0,0.056,0,0.05,0,0,…	0.878118,0.928154,0.836709,0.005240,0.877664,0.704160,0.326124,0.078043,0.943692,0.964708,0.987622,0.941362,0.682138,0.130087,0.908071,0.056792,0.018787,0.231879,0.176546,0.027057,0.668797,0.465224,0.195268,0.469449,0.968857,0.305254,0.338447,0.149723,0.127696,0.148923,0.999945,0.984678,0.943053,0.079353,0.996460,0.440130,0.803254,0.826039,0.227398,0.070807,0.774728,0.256164,0.027331,0.915954,0.5…	101	123	20	242	na	na	0	na	na	0.0897436	0.892911	120	142	32	238	0	1	0	-1	0.425121	-1	FALSE
all	RPS28_A375_gRNA213	A375	RPS28	CAACCTCCGGGCTTCTCGCTCTG	CAGAGCGAGAAGCCCGGAGGTTG	ENST00000600659	ACGCAGGTGCGCGTGGAATTCATGGACGACACGAGCCGATCCATCATCCGCAATGTAAAAGGCCCCGTGCGCGAGGGCGACGTGCTCACCCTTTTGGAGTCAGAGCGAGAAGCCCGGAGGTTGCGCTGAGCTTGGCTGCTCGCTGGGTCTTGGATGTCGGGTTCGACCACTTGGCCGATGGGAATGGTCTGTCACAGTCTGCTCCTTTTTTTTGTCCGCCACA	aacccctaccaactggtcggggtttgaaac	-16.9	((((((.(((....))).))))))..............((((.....))))..	-42.06	0.053,0.053,0.105,0.026,0.053,0.026,0,0.056,0,0.05,0,0,0,0,0,0.043,0.173,0.193,0.087,0.149,0,0.037,0.037,0,0.062,0,0.062,0,0.062,0,0.05,0.025,0.05,0.025,0,0.037,0.101,0.138,0.285,0.15,0.049,0.223,0.179,0.124,0.216,0.233,0.115,0.074,0.131,0.126,0.291,0.446,0.362,0.485,0.498,0.55,0.776,0.713,0.659,0.273,0.246,0.045,0.034,0.027,0.153,0.208,0.315,0.508,0.069,0.13,0.054,0.222,0.445,0.382,0.012,0.032,0…	0.042300,0.767004,0.527935,0.037281,0.145247,0.837271,0.469185,0.468250,0.406433,0.833305,0.942273,0.616397,0.899346,0.000754,0.555683,0.066267,0.045861,0.065963,0.290369,0.044781,0.862333,0.584666,0.228320,0.825217,0.244038,0.051663,0.197289,0.002099,0.675669,0.404858,0.999816,0.778922,0.862329,0.925704,0.943140,0.784904,0.035262,0.973926,0.864021,0.545015,0.969178,0.461873,0.116267,0.393095,0.1…	101	123	113	335	na	na	0	na	na	0.159879	0.822775	213	235	32	238	0	1	0	-1	0.874396	-1	FALSE
all	RPS28_A375_gRNA214	A375	RPS28	GCAACCTCCGGGCTTCTCGCTCT	AGAGCGAGAAGCCCGGAGGTTGC	ENST00000600659	CGCAGGTGCGCGTGGAATTCATGGACGACACGAGCCGATCCATCATCCGCAATGTAAAAGGCCCCGTGCGCGAGGGCGACGTGCTCACCCTTTTGGAGTCAGAGCGAGAAGCCCGGAGGTTGCGCTGAGCTTGGCTGCTCGCTGGGTCTTGGATGTCGGGTTCGACCACTTGGCCGATGGGAATGGTCTGTCACAGTCTGCTCCTTTTTTTTGTCCGCCACAC	aacccctaccaactggtcggggtttgaaac	-16.9	((((((.(((....))).))))))...............((((.....)))).	-42.73	0.053,0.105,0.026,0.053,0.026,0,0.056,0,0.05,0,0,0,0,0,0.043,0.173,0.193,0.087,0.149,0,0.037,0.037,0,0.062,0,0.062,0,0.062,0,0.05,0.025,0.05,0.025,0,0.037,0.101,0.138,0.285,0.15,0.049,0.223,0.179,0.124,0.216,0.233,0.115,0.074,0.131,0.126,0.291,0.446,0.362,0.485,0.498,0.55,0.776,0.713,0.659,0.273,0.246,0.045,0.034,0.027,0.153,0.208,0.315,0.508,0.069,0.13,0.054,0.222,0.445,0.382,0.012,0.032,0.003,0…	0.067331,0.794739,0.557897,0.029224,0.115482,0.849426,0.406947,0.576001,0.513043,0.868178,0.946954,0.694864,0.854934,0.000943,0.617861,0.057067,0.070488,0.074777,0.154541,0.056391,0.872301,0.585651,0.188410,0.798870,0.394824,0.089285,0.172896,0.003441,0.816777,0.236583,0.999810,0.742516,0.888905,0.920590,0.929533,0.740937,0.032316,0.963153,0.838783,0.486176,0.977483,0.336780,0.067576,0.407576,0.1…	101	123	114	336	na	na	0	na	na	0.160633	0.822021	214	236	32	238	0	1	0	-1	0.879227	-1	FALSE
all	RPS28_A375_gRNA226	A375	RPS28	GCCAAGCTCAGCGCAACCTCCGG	CCGGAGGTTGCGCTGAGCTTGGC	ENST00000600659	TGGAATTCATGGACGACACGAGCCGATCCATCATCCGCAATGTAAAAGGCCCCGTGCGCGAGGGCGACGTGCTCACCCTTTTGGAGTCAGAGCGAGAAGCCCGGAGGTTGCGCTGAGCTTGGCTGCTCGCTGGGTCTTGGATGTCGGGTTCGACCACTTGGCCGATGGGAATGGTCTGTCACAGTCTGCTCCTTTTTTTTGTCCGCCACACGTAACTGAGATG	aacccctaccaactggtcggggtttgaaac	-15.2	((((((.(((....))).)))))).....(((........)))..........	-45.62	0,0,0.043,0.173,0.193,0.087,0.149,0,0.037,0.037,0,0.062,0,0.062,0,0.062,0,0.05,0.025,0.05,0.025,0,0.037,0.101,0.138,0.285,0.15,0.049,0.223,0.179,0.124,0.216,0.233,0.115,0.074,0.131,0.126,0.291,0.446,0.362,0.485,0.498,0.55,0.776,0.713,0.659,0.273,0.246,0.045,0.034,0.027,0.153,0.208,0.315,0.508,0.069,0.13,0.054,0.222,0.445,0.382,0.012,0.032,0.003,0.027,0.165,0.087,0.138,0.328,0.438,0.076,0.105,0.03…	0.076495,0.763878,0.269228,0.019544,0.064571,0.521732,0.749281,0.512304,0.870091,0.918909,0.967103,0.672524,0.819864,0.038594,0.844877,0.218428,0.367029,0.127245,0.205057,0.056508,0.786765,0.553700,0.240511,0.823418,0.302081,0.198982,0.385589,0.002824,0.876116,0.064974,0.999929,0.930697,0.902820,0.926867,0.866359,0.831732,0.055333,0.952257,0.841133,0.636335,0.983504,0.159824,0.020431,0.706481,0.3…	101	123	126	348	na	na	0	na	na	0.169683	0.812971	226	248	32	238	0	1	0	-1	0.937198	-1	FALSE
all	RPS28_A375_gRNA230	A375	RPS28	AGCAGCCAAGCTCAGCGCAACCT	AGGTTGCGCTGAGCTTGGCTGCT	ENST00000600659	ATTCATGGACGACACGAGCCGATCCATCATCCGCAATGTAAAAGGCCCCGTGCGCGAGGGCGACGTGCTCACCCTTTTGGAGTCAGAGCGAGAAGCCCGGAGGTTGCGCTGAGCTTGGCTGCTCGCTGGGTCTTGGATGTCGGGTTCGACCACTTGGCCGATGGGAATGGTCTGTCACAGTCTGCTCCTTTTTTTTGTCCGCCACACGTAACTGAGATGCTCC	aacccctaccaactggtcggggtttgaaac	-15.2	((((((.(((....))).)))))).......((.((........)))).....	-41.21	0.193,0.087,0.149,0,0.037,0.037,0,0.062,0,0.062,0,0.062,0,0.05,0.025,0.05,0.025,0,0.037,0.101,0.138,0.285,0.15,0.049,0.223,0.179,0.124,0.216,0.233,0.115,0.074,0.131,0.126,0.291,0.446,0.362,0.485,0.498,0.55,0.776,0.713,0.659,0.273,0.246,0.045,0.034,0.027,0.153,0.208,0.315,0.508,0.069,0.13,0.054,0.222,0.445,0.382,0.012,0.032,0.003,0.027,0.165,0.087,0.138,0.328,0.438,0.076,0.105,0.036,0.366,0.059,0.…	0.138783,0.832999,0.140280,0.013856,0.062387,0.524954,0.663034,0.511030,0.933889,0.930582,0.948606,0.725252,0.837686,0.073599,0.572895,0.256388,0.570602,0.125113,0.127849,0.034367,0.733722,0.519621,0.308086,0.786261,0.355397,0.210786,0.475911,0.005034,0.914668,0.080566,0.999899,0.851915,0.838601,0.967801,0.973228,0.833666,0.052137,0.976170,0.897561,0.760727,0.981195,0.303162,0.026760,0.850206,0.3…	101	123	130	352	na	na	0	na	na	0.1727	0.809955	230	252	32	238	0	1	0	-1	0.956522	-1	FALSE
all	CNOT3_A375_gRNA568	A375	CNOT3	TGAACCGTTCCATTTGCGTCTCA	TGAGACGCAAATGGAACGGTTCA	ENST00000221232	AGATTAAGAAGCTACAACGGCTGAGGGACCAAATCAAGACATGGGTAGCGTCCAACGAGATCAAGGACAAGAGGCAGCTTATAGACAACCGCAAGCTCATTGAGACGCAAATGGAACGGTTCAAAGTTGTGGAACGAGAGACCAAAACCAAAGCTTACAGCAAAGAGGGCCTGGGCCTGGCCCAGAAGGTAGATCCTGCCCAGAAGGAGAAGGAAGAGGTTGG	aacccctaccaactggtcggggtttgaaac	-15	((((((.(((....))).))))))......(((..(((.......)))..)))	-36.62	-1,-1,-1,-1,-1,-1,-1,-1,-1,-1,-1,-1,-1,-1,-1,-1,-1,-1,-1,-1,-1,-1,-1,-1,-1,-1,-1,-1,-1,-1,-1,-1,-1,-1,-1,-1,-1,-1,-1,-1,-1,-1,-1,-1,-1,-1,-1,-1,-1,-1,-1,-1,-1,-1,-1,-1,-1,-1,-1,-1,-1,-1,-1,-1,-1,-1,-1,-1,-1,-1,-1,-1,-1,-1,-1,-1,-1,-1,-1,-1,-1,-1,-1,-1,-1,-1,-1,-1,-1,-1,-1,-1,-1,-1,-1,-1,-1,-1,-1,-1,-1,-1,-1,-1,-1,-1,-1,0.459,0.373,0.487,0.774,0.344,0.372,0.743,0.992,0.2,0.057,0.143,0.171,0.171,0.…	0.642958,0.073807,0.365905,0.369111,0.360673,0.034718,0.423912,0.140369,0.218753,0.982551,0.027632,0.308238,0.598477,0.990807,0.936057,0.247270,0.433535,0.201760,0.629283,0.336388,0.775482,0.607086,0.449227,0.587596,0.977741,0.989946,0.263808,0.576530,0.846145,0.120090,0.962345,0.426527,0.806698,0.093663,0.627265,0.530207,0.401582,0.112774,0.033447,0.160354,0.120710,0.251943,0.714263,0.894102,0.7…	101	123	468	690	na	na	0	na	na	0.198808	0.793128	568	590	317	2575	0	1	0	-1	0.111111	-1	FALSE
all	CNOT3_A375_gRNA1010	A375	CNOT3	ACCAGCGCCTGTGGAATGTCCTC	GAGGACATTCCACAGGCGCTGGT	ENST00000221232	CGCCATCCGCAAGATCAAGGACGACGTTGAGTACTATGTTGACTCATCCCAGGACCCCGACTTCGAGGAGAACGAGTTTCTCTACGATGACCTGGACCTCGAGGACATTCCACAGGCGCTGGTCGCCACCTCCCCCCCCAGCCACAGCCACATGGAGGATGAGATCTTCAACCAGTCCAGCAGCACGCCCACCTCAACCACCTCCAGCTCTCCCATCCCGCCC	aacccctaccaactggtcggggtttgaaac	-14.5	((((((.(((....))).))))))....((((((.......)))..)))....	-43.63	0.143,0.168,0,0.166,0.141,0.141,0.066,0.385,0.163,0.484,1,0.435,0.999,0.912,0.72,0.429,1,1,0.256,0.569,0.545,0.087,0.709,0.35,0.278,0.278,0.302,0.419,0.347,0.157,0.395,0.3,0.534,0.251,0.723,1,0.999,0.583,0.654,1,0.702,0.512,0.3,0.015,0.396,0.586,0.276,0.469,0.086,0.493,0.015,0.158,0.424,0.424,0.472,0.303,0.063,0.184,0.911,0.619,0.305,0.329,0.064,0.137,0.161,0.453,0.064,0.187,0.015,0.015,0.187,0.0…	0.019129,0.036575,0.929094,0.002278,0.157991,0.118993,0.032026,0.018605,0.027758,0.411267,0.081372,0.206100,0.015176,0.383019,0.032221,0.118145,0.116867,0.051449,0.006251,0.013373,0.238266,0.515695,0.020541,0.132718,0.001032,0.009235,0.134205,0.001608,0.060393,0.279043,0.000690,0.011950,0.036273,0.027184,0.245087,0.004688,0.006493,0.002254,0.014483,0.157762,0.004084,0.129162,0.040863,0.000950,0.8…	101	123	910	1132	na	na	0	na	na	0.353787	0.638149	1010	1032	317	2575	0	1	0	-1	0.306773	-1	FALSE
all	CNOT3_A375_gRNA1190	A375	CNOT3	GACTGGCTGACTTCACTGTCTGT	ACAGACAGTGAAGTCAGCCAGTC	ENST00000221232	CAGCACGCCCACCTCAACCACCTCCAGCTCTCCCATCCCGCCCAGCCCAGCCAACTGTACCACGGAAAACTCTGAAGATGATAAGAAGAGGGGACGTTCCACAGACAGTGAAGTCAGCCAGTCTCCAGCCAAAAACGGCTCCAAGCCTGTCCACAGCAACCAGCACCCTCAGTCCCCAGCTGTGCCGCCCACCTACCCCTCCGGCCCCCCGCCTGCTGCCTCT	aacccctaccaactggtcggggtttgaaac	-16.1	((((((.(((....))).))))))...........((.(((......))).))	-38.59	0.551,0.642,0.229,0.413,0.184,0.092,0.184,0.046,0.046,0.23,0.231,0.046,0.046,0.046,0.139,0.046,0.186,0.139,0.139,0.139,0.047,0.14,0.047,0,0.14,0.187,0.094,0.141,0,0,0,0.141,0,0.094,0.423,0.094,0.236,0.047,0.047,0.094,0,0.094,0.33,0.141,0.283,0.094,0,0.328,0.282,0.61,0.233,0.28,0.233,0.42,0.233,0.464,1,0.51,0.603,0.232,0.463,0.278,0.046,0,-1,-1,-1,-1,-1,-1,-1,-1,-1,-1,-1,-1,-1,-1,-1,-1,-1,-1,-1,-1…	0.186512,0.026715,0.207194,0.488363,0.035678,0.348105,0.141047,0.092528,0.361519,0.887783,0.458959,0.079670,0.167625,0.870946,0.955567,0.219157,0.028201,0.087866,0.107972,0.028224,0.400836,0.675413,0.204218,0.467338,0.050051,0.068613,0.191912,0.252586,0.016760,0.019518,0.258471,0.064114,0.411443,0.042513,0.003759,0.027226,0.038759,0.007981,0.082700,0.010535,0.016358,0.006382,0.096579,0.307174,0.2…	101	123	1090	1312	na	na	0	na	na	0.4169	0.575035	1190	1212	317	2575	0	1	0	-1	0.386454	-1	FALSE
all	CNOT3_A375_gRNA1194	A375	CNOT3	TGGAGACTGGCTGACTTCACTGT	ACAGTGAAGTCAGCCAGTCTCCA	ENST00000221232	ACGCCCACCTCAACCACCTCCAGCTCTCCCATCCCGCCCAGCCCAGCCAACTGTACCACGGAAAACTCTGAAGATGATAAGAAGAGGGGACGTTCCACAGACAGTGAAGTCAGCCAGTCTCCAGCCAAAAACGGCTCCAAGCCTGTCCACAGCAACCAGCACCCTCAGTCCCCAGCTGTGCCGCCCACCTACCCCTCCGGCCCCCCGCCTGCTGCCTCTGCCT	aacccctaccaactggtcggggtttgaaac	-15.6	((((((.(((....))).))))))......(((((.(.....).)))))....	-41.68	0.184,0.092,0.184,0.046,0.046,0.23,0.231,0.046,0.046,0.046,0.139,0.046,0.186,0.139,0.139,0.139,0.047,0.14,0.047,0,0.14,0.187,0.094,0.141,0,0,0,0.141,0,0.094,0.423,0.094,0.236,0.047,0.047,0.094,0,0.094,0.33,0.141,0.283,0.094,0,0.328,0.282,0.61,0.233,0.28,0.233,0.42,0.233,0.464,1,0.51,0.603,0.232,0.463,0.278,0.046,0,-1,-1,-1,-1,-1,-1,-1,-1,-1,-1,-1,-1,-1,-1,-1,-1,-1,-1,-1,-1,-1,-1,-1,-1,-1,-1,-1,-1…	0.242406,0.019524,0.293980,0.800793,0.040559,0.334224,0.284498,0.096330,0.405226,0.861233,0.277078,0.080199,0.127583,0.880277,0.942217,0.629122,0.036357,0.052773,0.116404,0.030195,0.339997,0.604910,0.283279,0.531246,0.095127,0.095751,0.256737,0.171152,0.018490,0.025200,0.077432,0.065488,0.481997,0.056630,0.005472,0.030107,0.042309,0.014393,0.109165,0.078107,0.027581,0.009345,0.166669,0.199388,0.2…	101	123	1094	1316	na	na	0	na	na	0.418303	0.573633	1194	1216	317	2575	0	1	0	-1	0.388225	-1	FALSE
all	CNOT3_A375_gRNA2187	A375	CNOT3	AGAGTCAGAGGGGTGAGGCATGT	ACATGCCTCACCCCTCTGACTCT	ENST00000221232	GTGAACATACCGCTGTCGCTGGGTGTCTGTCCACTGGGCCCTGTGCCCCTCACCAAGGAGCAGCTCTATCAGCAGGCCATGGAAGAGGCCGCCTGGCACCACATGCCTCACCCCTCTGACTCTGAGCGTATTCGGCAGTACCTCCCCCGGAACCCCTGTCCGACGCCCCCCTACCACCACCAGATGCCACCCCCACACTCGGACACTGTGGAATTCTACCAGC	aacccctaccaactggtcggggtttgaaac	-15.1	((((((.(((....))).))))))....((((..(((......)))..).)))	-45.46	0.131,0.066,0.459,1,0.804,1,1,1,0.987,0.261,0.36,0.294,0.065,0.392,0.49,0.359,0.555,0.163,0.163,0.131,0,0.163,0.098,0.196,0.261,0.196,0.228,0.392,0.522,0.326,0.196,0.228,0.457,0.326,0.163,0.065,0.032,0.064,0.032,0.161,0.386,0.955,0.222,0.761,0.032,0.095,0.189,0.22,0.535,0.315,0.378,0.5,0.375,0.375,0.897,0.344,0.155,0.404,0.714,0.155,0.404,0.493,0.524,0.308,0.154,0.709,1,1,0.306,0.987,0.971,0.122,…	0.104283,0.154197,0.826021,0.004353,0.066932,0.362730,0.046966,0.007832,0.003857,0.269732,0.702630,0.014235,0.106083,0.005319,0.519085,0.220052,0.119584,0.004360,0.002105,0.079473,0.476301,0.449397,0.318494,0.465067,0.043462,0.004688,0.657819,0.002479,0.021544,0.029199,0.002901,0.001853,0.887181,0.057576,0.090177,0.230646,0.008905,0.000801,0.000667,0.040088,0.070398,0.022281,0.010924,0.008350,0.4…	101	123	2087	2309	na	na	0	na	na	0.76648	0.225456	2187	2209	317	2575	0	1	0	-1	0.8278	-1	FALSE
all	CNOT3_A375_gRNA2462	A375	CNOT3	GTGCCCTGCTCAAACTCGTCAGT	ACTGACGAGTTTGAGCAGGGCAC	ENST00000221232	GGCACAGTATCTGGCAGCCAAGGCCCTAAAGAAGCAGTCATGGCGATTCCACACCAAGTACATGATGTGGTTCCAGAGGCACGAGGAGCCCAAGACCATCACTGACGAGTTTGAGCAGGGCACCTACATCTACTTTGACTACGAGAAGTGGGGCCAGCGGAAGAAGGAAGGCTTCACCTTTGAGTACCGCTACCTGGAGGACCGGGACCTCCAGTGACACCGG	aacccctaccaactggtcggggtttgaaac	-13.5	((((((.(((....))).))))))...........((((........).))).	-42.23	0.022,0.044,0.111,0.089,0.267,0.334,0.289,1,1,0.98,0.289,0.178,0.652,0.157,1,1,0,0.091,0.136,0.273,0.114,0.227,0.023,0,0.046,0.138,0.781,1,0.487,0.209,0.209,0.487,0.282,0.329,0.634,0.352,0.352,0.262,0.595,0.476,0.357,0.238,0.144,0.265,0.361,0.506,0.578,0.292,0,0.17,0.097,0.243,0.246,0.172,0.418,0.738,1,1,1,0.845,1,0.908,0.636,0.866,1,0.986,0.232,0.402,0.054,0.322,0.241,0.214,0.139,0.306,0.389,0.2…	0.275128,0.007172,0.596383,0.115121,0.724966,0.069350,0.014179,0.076147,0.008500,0.932582,0.032570,0.011204,0.037126,0.673495,0.942507,0.212552,0.039374,0.066419,0.394224,0.004543,0.120333,0.510833,0.008054,0.283596,0.473358,0.306802,0.087087,0.000726,0.145583,0.694122,0.012443,0.000445,0.034555,0.016901,0.082049,0.017431,0.017308,0.017654,0.008941,0.162493,0.005627,0.150327,0.008645,0.001483,0.6…	101	123	2362	2584	na	na	0	na	na	0.862903	0.129032	2462	2484	317	2575	0	1	0	-1	0.949535	-1	FALSE
all	PRELID3B_A375_gRNA183	A375	PRELID3B	ACGTGCTCCGAAGTCCAGATCTT	AAGATCTGGACTTCGGAGCACGT	ENST00000355937	GCCGGCTGGGGTGCTGGGGGCGGGGCAGGGGCAGGTGTAGCCTCTGTGCCTCGTTGTCCCCTGGCGCTACCCGGACATCTCTCAGGGTGCCGGCACCATGAAGATCTGGACTTCGGAGCACGTCTTTGACCACCCGTGGGAAACTGTTACAACAGCTGCAATGCAGAAATACCCAAACCCTATGAACCCAAGTGTGGTTGGAGTTGATGTGTTGGACAGACAT	aacccctaccaactggtcggggtttgaaac	-14.3	............(((((((((((.((.....)).)))))))...)))).....	-40.25	-1,-1,-1,-1,-1,-1,-1,-1,-1,-1,-1,-1,-1,-1,-1,-1,-1,-1,-1,-1,-1,-1,-1,-1,-1,-1,-1,-1,-1,-1,-1,-1,-1,-1,-1,-1,-1,-1,-1,-1,-1,-1,-1,-1,-1,-1,-1,-1,-1,-1,-1,-1,-1,-1,-1,-1,-1,-1,-1,-1,-1,-1,-1,-1,-1,-1,-1,-1,-1,-1,-1,-1,-1,-1,-1,-1,-1,-1,-1,-1,-1,-1,-1,-1,-1,-1,-1,-1,-1,-1,-1,-1,-1,-1,-1,-1,-1,-1,-1,-1,-1,-1,-1,-1,-1,-1,-1,-1,-1,-1,-1,-1,-1,-1,-1,-1,-1,-1,-1,-1,-1,-1,-1,-1,-1,-1,-1,-1,-1,0.153,0.23,0…	0.606161,0.796411,0.399234,0.281661,0.327762,0.346391,0.284264,0.349465,0.824472,0.817599,0.015565,0.549272,0.167201,0.860647,0.767551,0.012097,0.158213,0.272379,0.650136,0.349631,0.497042,0.851588,0.215915,0.839786,0.555411,0.040987,0.125798,0.540459,0.780999,0.753029,0.412232,0.255368,0.941722,0.087757,0.177876,0.111366,0.061534,0.851126,0.230658,0.003903,0.020668,0.192692,0.658535,0.316416,0.4…	101	123	83	305	na	na	0	na	na	0.0693069	0.921935	183	205	180	761	0	1	0	-1	0.00515464	-1	FALSE
all	PRELID3B_A375_gRNA188	A375	PRELID3B	CAAAGACGTGCTCCGAAGTCCAG	CTGGACTTCGGAGCACGTCTTTG	ENST00000355937	CTGGGGTGCTGGGGGCGGGGCAGGGGCAGGTGTAGCCTCTGTGCCTCGTTGTCCCCTGGCGCTACCCGGACATCTCTCAGGGTGCCGGCACCATGAAGATCTGGACTTCGGAGCACGTCTTTGACCACCCGTGGGAAACTGTTACAACAGCTGCAATGCAGAAATACCCAAACCCTATGAACCCAAGTGTGGTTGGAGTTGATGTGTTGGACAGACATATAGA	aacccctaccaactggtcggggtttgaaac	-14.2	((((((.(((....))).))))))..........(((..........)))...	-40.46	-1,-1,-1,-1,-1,-1,-1,-1,-1,-1,-1,-1,-1,-1,-1,-1,-1,-1,-1,-1,-1,-1,-1,-1,-1,-1,-1,-1,-1,-1,-1,-1,-1,-1,-1,-1,-1,-1,-1,-1,-1,-1,-1,-1,-1,-1,-1,-1,-1,-1,-1,-1,-1,-1,-1,-1,-1,-1,-1,-1,-1,-1,-1,-1,-1,-1,-1,-1,-1,-1,-1,-1,-1,-1,-1,-1,-1,-1,-1,-1,-1,-1,-1,-1,-1,-1,-1,-1,-1,-1,-1,-1,-1,-1,-1,-1,-1,-1,-1,-1,-1,-1,-1,-1,-1,-1,-1,-1,-1,-1,-1,-1,-1,-1,-1,-1,-1,-1,-1,-1,-1,-1,-1,-1,0.153,0.23,0.077,0.153,0,0,…	0.439049,0.790789,0.401098,0.325778,0.257538,0.327199,0.187636,0.381505,0.898993,0.878389,0.025591,0.624814,0.362341,0.945522,0.681492,0.038227,0.166207,0.191036,0.508345,0.179520,0.668014,0.814467,0.141566,0.802265,0.603534,0.099090,0.133054,0.545405,0.731092,0.535402,0.597160,0.146320,0.890225,0.144712,0.251933,0.039727,0.112548,0.852948,0.121420,0.005317,0.020469,0.178782,0.682408,0.252988,0.4…	101	123	88	310	na	na	0	na	na	0.071211	0.92003	188	210	180	761	0	1	0	-1	0.0137457	-1	FALSE
all	PRELID3B_A375_gRNA570	A375	PRELID3B	CTGAGGCTAACTCCTTTCACGGT	ACCGTGAAAGGAGTTAGCCTCAG	ENST00000355937	TATTTCATTTACAAACATGGTTTCAGTAGATGAGAGACTTATATACAAACCACATCCTCAGGATCCAGAAAAAACTGTTTTGACACAAGAAGCCATAATTACCGTGAAAGGAGTTAGCCTCAGCAGTTACCTTGAAGGACTGATGGCAAGTACGATATCCTCAAATGCTAGTAAAGGCCGAGAAGCAATGGAATGGGTAATACATAAATTAAATGCTGAGATT	aacccctaccaactggtcggggtttgaaac	-17.6	((((((.(((....))).))))))(((((...(((.....))).)))))....	-38.76	-1,-1,-1,-1,-1,-1,-1,-1,-1,-1,-1,-1,-1,-1,-1,-1,-1,-1,-1,-1,-1,-1,-1,-1,-1,-1,-1,-1,-1,-1,-1,-1,-1,-1,-1,-1,-1,-1,-1,-1,-1,-1,-1,-1,-1,-1,-1,-1,-1,-1,-1,-1,-1,-1,-1,-1,-1,-1,-1,-1,-1,-1,-1,-1,-1,-1,-1,-1,-1,-1,-1,-1,-1,-1,-1,-1,-1,-1,-1,-1,-1,-1,-1,-1,-1,-1,-1,-1,-1,-1,-1,-1,-1,-1,-1,-1,-1,-1,-1,-1,-1,-1,-1,-1,-1,-1,-1,-1,-1,-1,-1,-1,-1,-1,-1,-1,-1,-1,-1,-1,-1,-1,-1,-1,-1,-1,-1,-1,-1,-1,-1,-1,-1,…	0.817373,0.181637,0.601274,0.185830,0.584131,0.227582,0.342280,0.802501,0.764132,0.684422,0.066522,0.588407,0.028942,0.989819,0.120493,0.000025,0.239641,0.542702,0.549760,0.903911,0.865812,0.987860,0.474002,0.917899,0.677361,0.750502,0.628841,0.824838,0.741564,0.504387,0.105817,0.198531,0.178332,0.066864,0.272828,0.008237,0.356135,0.448193,0.498477,0.006329,0.442463,0.216079,0.368837,0.321783,0.7…	101	123	470	692	na	na	0	na	na	0.216679	0.774562	570	592	180	761	0	1	0	-1	0.670103	-1	FALSE
all	PRELID3B_A375_gRNA642	A375	PRELID3B	CATTCCATTGCTTCTCGGCCTTT	AAAGGCCGAGAAGCAATGGAATG	ENST00000355937	AACTGTTTTGACACAAGAAGCCATAATTACCGTGAAAGGAGTTAGCCTCAGCAGTTACCTTGAAGGACTGATGGCAAGTACGATATCCTCAAATGCTAGTAAAGGCCGAGAAGCAATGGAATGGGTAATACATAAATTAAATGCTGAGATTGAAGAACTGACAGCCTCAGCAAGAGGAACCATAAGGACTCCAATGGCAGCAGCAGCGTTTGCAGAGAAGTGA	aacccctaccaactggtcggggtttgaaac	-13.6	((((((.(((....))).))))))...............(((....)))....	-38.69	-1,-1,-1,-1,-1,-1,-1,-1,-1,-1,-1,-1,-1,-1,-1,-1,-1,-1,-1,-1,-1,-1,-1,-1,-1,-1,-1,-1,-1,-1,-1,-1,-1,-1,-1,-1,-1,-1,-1,-1,-1,-1,-1,-1,-1,-1,-1,-1,-1,-1,-1,-1,-1,-1,-1,-1,-1,-1,-1,-1,-1,-1,-1,-1,-1,-1,-1,-1,-1,-1,-1,-1,-1,-1,-1,-1,-1,-1,-1,-1,-1,-1,-1,-1,-1,-1,-1,-1,-1,-1,-1,-1,-1,-1,-1,-1,-1,-1,-1,-1,-1,-1,-1,0.2,0,0.067,0,0.333,0.067,0.4,0.333,0.4,0.333,0.2,0.467,0.133,0.067,0.133,0.133,0.333,0.26…	0.693949,0.056843,0.794946,0.906998,0.889837,0.081580,0.673871,0.391396,0.442037,0.991986,0.035284,0.008726,0.861127,0.999456,0.702295,0.118950,0.676695,0.413676,0.966181,0.703639,0.961702,0.982801,0.289292,0.672487,0.990531,0.920303,0.430513,0.647630,0.967680,0.672585,0.971528,0.657783,0.317365,0.022500,0.374566,0.017582,0.328216,0.095711,0.092760,0.005730,0.085014,0.681915,0.082088,0.837582,0.8…	101	123	542	764	na	na	0	na	na	0.244097	0.747144	642	664	180	761	0	1	0	-1	0.793814	-1	FALSE
all	PRELID3B_A375_gRNA645	A375	PRELID3B	ACCCATTCCATTGCTTCTCGGCC	GGCCGAGAAGCAATGGAATGGGT	ENST00000355937	TGTTTTGACACAAGAAGCCATAATTACCGTGAAAGGAGTTAGCCTCAGCAGTTACCTTGAAGGACTGATGGCAAGTACGATATCCTCAAATGCTAGTAAAGGCCGAGAAGCAATGGAATGGGTAATACATAAATTAAATGCTGAGATTGAAGAACTGACAGCCTCAGCAAGAGGAACCATAAGGACTCCAATGGCAGCAGCAGCGTTTGCAGAGAAGTGATCG	aacccctaccaactggtcggggtttgaaac	-13.6	((((((.(((....))).))))))..................(((....))).	-42.57	-1,-1,-1,-1,-1,-1,-1,-1,-1,-1,-1,-1,-1,-1,-1,-1,-1,-1,-1,-1,-1,-1,-1,-1,-1,-1,-1,-1,-1,-1,-1,-1,-1,-1,-1,-1,-1,-1,-1,-1,-1,-1,-1,-1,-1,-1,-1,-1,-1,-1,-1,-1,-1,-1,-1,-1,-1,-1,-1,-1,-1,-1,-1,-1,-1,-1,-1,-1,-1,-1,-1,-1,-1,-1,-1,-1,-1,-1,-1,-1,-1,-1,-1,-1,-1,-1,-1,-1,-1,-1,-1,-1,-1,-1,-1,-1,-1,-1,-1,-1,0.2,0,0.067,0,0.333,0.067,0.4,0.333,0.4,0.333,0.2,0.467,0.133,0.067,0.133,0.133,0.333,0.267,0,0,0.0…	0.663347,0.053866,0.860992,0.872187,0.895917,0.114454,0.665159,0.435536,0.467609,0.991494,0.063038,0.007074,0.819814,0.999551,0.807520,0.275003,0.667558,0.326706,0.951968,0.622299,0.959400,0.981007,0.308587,0.772357,0.959069,0.935846,0.452118,0.554649,0.967459,0.819155,0.969410,0.611292,0.348729,0.014273,0.220406,0.018343,0.241728,0.092464,0.049542,0.010301,0.046503,0.695230,0.062326,0.761317,0.7…	101	123	545	767	na	na	0	na	na	0.24524	0.746002	645	667	180	761	0	1	0	-1	0.798969	-1	FALSE
all	PRELID3B_A375_gRNA735	A375	PRELID3B	TCTGCAAACGCTGCTGCTGCCAT	ATGGCAGCAGCAGCGTTTGCAGA	ENST00000355937	TGCTAGTAAAGGCCGAGAAGCAATGGAATGGGTAATACATAAATTAAATGCTGAGATTGAAGAACTGACAGCCTCAGCAAGAGGAACCATAAGGACTCCAATGGCAGCAGCAGCGTTTGCAGAGAAGTGATCGTGACAGTTGGTAGACAACATCGGGTACTCCAGGTCTCTCCAAACTGACTATATATTTATTTGTTATTTTAAAAATACAACTATATTTTGG	aacccctaccaactggtcggggtttgaaac	-15.3	((((((.(((....))).)))))).........(((...((....)))))...	-39.38	-1,-1,-1,-1,-1,-1,-1,-1,-1,-1,0.2,0,0.067,0,0.333,0.067,0.4,0.333,0.4,0.333,0.2,0.467,0.133,0.067,0.133,0.133,0.333,0.267,0,0,0.067,0.267,0.267,0.467,0.2,0.4,0.4,0.067,0.333,0.333,0.267,0.6,0.933,0.933,0.4,0.333,0.933,0.533,0.332,0.266,0.066,0.133,0.133,0.132,0.198,0.33,0.264,0.66,0.46,1,0.591,1,0.919,1,0.327,1,1,0.784,1,0.782,0.521,0,0.065,0,0.065,0.065,0.196,0.521,1,0.783,0.587,0.326,0.391,1,0.…	0.907627,0.275748,0.659724,0.936810,0.453725,0.070649,0.042727,0.062041,0.952583,0.996254,0.427150,0.014344,0.471346,0.988824,0.969527,0.026318,0.610736,0.323757,0.656864,0.075102,0.227931,0.385864,0.075678,0.489613,0.922888,0.871713,0.642724,0.266467,0.872666,0.777806,0.798384,0.463864,0.910538,0.000918,0.619518,0.039554,0.119617,0.319512,0.005847,0.132119,0.013829,0.259761,0.011406,0.378393,0.9…	101	123	635	857	na	na	0	na	na	0.279513	0.711729	735	757	180	761	0	1	0	-1	0.953608	-1	FALSE
all	SMU1_A375_gRNA307	A375	SMU1	GCAGCACCCAATTCACGGAGCTC	GAGCTCCGTGAATTGGGTGCTGC	ENST00000397149	CAGTGGCCATTGGGATACTGTGTTGCAGGCTATACAGTCTCTGAAATTGCCAGACAAAACCCTCATTGACCTCTATGAACAGGTTGTTCTGGAATTGATAGAGCTCCGTGAATTGGGTGCTGCCAGGTCACTTTTGAGACAGACTGATCCCATGATCATGTTAAAACAAACACAGCCAGAGCGATATATTCATCTGGAGAACCTTTTGGCCAGGTCTTACTTT	aacccctaccaactggtcggggtttgaaac	-16.4	((((((.(((....))).))))))........(((.((........)).))).	-36.98	na	0.864848,0.041250,0.055758,0.184721,0.686749,0.077148,0.532812,0.140086,0.889683,0.625508,0.702772,0.058052,0.123031,0.952846,0.485554,0.874093,0.935047,0.707903,0.541933,0.850749,0.822076,0.174916,0.774893,0.814611,0.250559,0.348480,0.087954,0.494184,0.892835,0.827954,0.499757,0.433241,0.233737,0.087647,0.508618,0.824990,0.237811,0.128102,0.049458,0.486284,0.056810,0.139725,0.408646,0.056164,0.0…	101	123	207	429	na	na	0	na	na	0.0429655	0.953805	307	329	52	1590	0	1	0	-1	0.165692	-1	FALSE
all	SMU1_A375_gRNA378	A375	SMU1	GATGAATATATCGCTCTGGCTGT	ACAGCCAGAGCGATATATTCATC	ENST00000397149	TCTATGAACAGGTTGTTCTGGAATTGATAGAGCTCCGTGAATTGGGTGCTGCCAGGTCACTTTTGAGACAGACTGATCCCATGATCATGTTAAAACAAACACAGCCAGAGCGATATATTCATCTGGAGAACCTTTTGGCCAGGTCTTACTTTGATCCTCGTGAGGCATACCCAGATGGAAGTAGCAAAGAAAAGAGAAGAGCAGCAATTGCCCAGGCCTTAGC	aacccctaccaactggtcggggtttgaaac	-15	((((((.(((....))).)))))).....(((((....)))))..........	-37.79	na	0.519384,0.013148,0.017224,0.471843,0.529049,0.124571,0.237968,0.263570,0.852808,0.652853,0.912979,0.003232,0.179509,0.959413,0.037954,0.971257,0.878466,0.359247,0.426362,0.913966,0.930500,0.614422,0.602288,0.809183,0.497578,0.950909,0.078435,0.777212,0.962288,0.738894,0.850857,0.020758,0.204481,0.132538,0.687487,0.833880,0.316743,0.055080,0.004111,0.150297,0.010154,0.004742,0.572173,0.064934,0.0…	101	123	278	500	na	na	0	na	na	0.0529346	0.943836	378	400	52	1590	0	1	0	-1	0.211826	-1	FALSE
all	SMU1_A375_gRNA564	A375	SMU1	GAAGCAATCCCTGATGCTGCTGC	GCAGCAGCATCAGGGATTGCTTC	ENST00000397149	AAGAAAAGAGAAGAGCAGCAATTGCCCAGGCCTTAGCTGGCGAAGTCAGTGTGGTGCCTCCATCTCGTCTCATGGCATTGCTGGGACAGGCACTGAAGTGGCAGCAGCATCAGGGATTGCTTCCTCCTGGTATGACCATAGATTTGTTTCGAGGCAAGGCAGCTGTCAAAGATGTGGAAGAAGAAAAGTTTCCTACACAACTGAGCAGGCATATTAAGTTTGG	aacccctaccaactggtcggggtttgaaac	-15.8	((((((.(((....))).))))))........((((........)))).....	-38.24	na	0.852335,0.299374,0.007249,0.235970,0.569772,0.805962,0.551942,0.676706,0.359640,0.528651,0.946975,0.110598,0.240376,0.748565,0.385317,0.931130,0.864187,0.549471,0.637207,0.753708,0.680764,0.168222,0.473846,0.178407,0.640363,0.136580,0.378992,0.177217,0.983038,0.290824,0.967922,0.493091,0.538239,0.433183,0.776661,0.534769,0.677846,0.195569,0.175049,0.704880,0.245587,0.180537,0.089323,0.295112,0.5…	101	123	464	686	na	na	0	na	na	0.0790508	0.91772	564	586	52	1590	0	1	0	-1	0.332684	-1	FALSE
all	SMU1_A375_gRNA665	A375	SMU1	ACCAAACTTAATATGCCTGCTCA	TGAGCAGGCATATTAAGTTTGGT	ENST00000397149	CAGCAGCATCAGGGATTGCTTCCTCCTGGTATGACCATAGATTTGTTTCGAGGCAAGGCAGCTGTCAAAGATGTGGAAGAAGAAAAGTTTCCTACACAACTGAGCAGGCATATTAAGTTTGGTCAGAAATCACATGTGGAGTGTGCTCGATTTTCTCCAGATGGTCAGTATTTGGTCACTGGGTCTGTTGATGGATTCATTGAAGTATGGAACTTTACTACTG	aacccctaccaactggtcggggtttgaaac	-12.8	((((((.(((....))).)))))).............................	-35.14	na	0.913540,0.081845,0.032532,0.883654,0.395266,0.212299,0.852182,0.715843,0.974205,0.977095,0.958144,0.036148,0.309726,0.983788,0.355379,0.971614,0.945246,0.856188,0.417625,0.940169,0.832897,0.454061,0.532808,0.612408,0.976345,0.920354,0.638216,0.933293,0.986175,0.580097,0.734629,0.133133,0.195712,0.058568,0.928592,0.488417,0.695453,0.573015,0.060604,0.706043,0.147863,0.336008,0.326487,0.431233,0.5…	101	123	565	787	na	na	0	na	na	0.0932322	0.903538	665	687	52	1590	0	1	0	-1	0.398311	-1	FALSE
all	SMU1_A375_gRNA848	A375	SMU1	GCTGAAACACATGCAGAGGACAG	CTGTCCTCTGCATGTGTTTCAGC	ENST00000397149	TCTGTTGATGGATTCATTGAAGTATGGAACTTTACTACTGGAAAAATCAGAAAGGATCTTAAGTACCAGGCCCAAGATAACTTTATGATGATGGATGATGCTGTCCTCTGCATGTGTTTCAGCAGAGATACAGAAATGTTAGCAACTGGGGCCCAAGATGGAAAAATCAAGGTGTGGAAGATTCAGAGTGGACAATGTTTAAGGAGATTTGAGAGGGCACACA	aacccctaccaactggtcggggtttgaaac	-13.6	((((((.(((....))).)))))).....(.(((.........))).).....	-41.26	na	0.661123,0.006279,0.070065,0.235023,0.491394,0.119615,0.445413,0.528152,0.763520,0.573629,0.769137,0.037046,0.079875,0.960650,0.412493,0.710829,0.969579,0.491409,0.167782,0.816888,0.738403,0.252275,0.496901,0.612611,0.122879,0.790998,0.025970,0.505140,0.983637,0.126567,0.963679,0.092176,0.120759,0.045366,0.701793,0.671611,0.327510,0.050385,0.015637,0.144204,0.012966,0.549429,0.303138,0.170373,0.4…	101	123	748	970	na	na	0	na	na	0.118927	0.877843	848	870	52	1590	0	1	0	-1	0.517219	-1	FALSE
all	SMU1_A375_gRNA1008	A375	SMU1	AAGAAGCACTAAGGATCTGACTG	CAGTCAGATCCTTAGTGCTTCTT	ENST00000397149	GAAAAATCAAGGTGTGGAAGATTCAGAGTGGACAATGTTTAAGGAGATTTGAGAGGGCACACAGTAAGGGTGTCACCTGTCTAAGCTTTTCTAAGGATAGCAGTCAGATCCTTAGTGCTTCTTTTGACCAGACAATTAGAATTCATGGTTTAAAATCTGGGAAAACCCTGAAGGAATTTCGTGGCCATTCCTCCTTTGTTAACGAAGCAACATTTACACAAGA	aacccctaccaactggtcggggtttgaaac	-13.2	((((((.(((....))).)))))).......(((..(.....)..))).....	-38.45	na	0.755015,0.101043,0.021874,0.871071,0.691771,0.704430,0.592087,0.662042,0.940430,0.555224,0.988772,0.098173,0.057898,0.983614,0.021221,0.879421,0.940687,0.794470,0.787275,0.888899,0.928121,0.291636,0.943324,0.850632,0.390927,0.836057,0.270522,0.923872,0.954948,0.634257,0.959531,0.293409,0.362513,0.104214,0.837398,0.670508,0.818268,0.649093,0.036488,0.536885,0.258807,0.001716,0.320119,0.091990,0.4…	101	123	908	1130	na	na	0	na	na	0.141393	0.855378	1008	1030	52	1590	0	1	0	-1	0.621183	-1	FALSE
all	CSE1L_A375_gRNA524	A375	CSE1L	TCCACTCTGAAAGCGATTCACCA	TGGTGAATCGCTTTCAGAGTGGA	ENST00000262982	CTTAGCAGCCCAGAGCAAATTCAGAAGCAGTTAAGTGATGCAATTAGCATTATTGGCAGAGAAGATTTTCCACAGAAATGGCCTGACTTGCTGACAGAAATGGTGAATCGCTTTCAGAGTGGAGATTTCCATGTTATTAATGGAGTCCTCCGTACAGCACATTCATTATTTAAAAGATACCGTCATGAATTTAAGTCAAACGAGTTATGGACTGAAATTAAGC	aacccctaccaactggtcggggtttgaaac	-13	((((((.(((....))).)))))).............((((.....))))...	-37.98	0.151,0.151,0.15,0,0,0.15,0.301,0,0,0.15,0,-1,-1,-1,-1,-1,-1,-1,-1,-1,-1,-1,-1,-1,-1,-1,-1,-1,-1,-1,-1,-1,-1,-1,-1,-1,-1,-1,-1,-1,-1,-1,-1,-1,-1,-1,-1,-1,0.557,0.139,0,0.818,0.416,0,0.278,0,0,0.415,0.692,0,0.692,0.414,0.414,0,0.276,0.552,0.137,0.275,0.412,0.137,0,-1,-1,-1,0.274,0.411,0.547,0.411,-1,-1,-1,-1,-1,-1,-1,-1,-1,-1,-1,-1,-1,-1,-1,-1,-1,-1,-1,-1,-1,-1,-1,-1,-1,-1,-1,-1,0.771,0.894,0.771,…	0.003233,0.077995,0.021585,0.104675,0.305794,0.117268,0.060856,0.683697,0.009425,0.501087,0.682470,0.000344,0.081318,0.973967,0.302654,0.289880,0.018864,0.333917,0.567853,0.021221,0.712511,0.646584,0.545649,0.711920,0.036090,0.287125,0.025932,0.580609,0.152107,0.007812,0.107115,0.012823,0.014799,0.002620,0.080602,0.000121,0.088184,0.004957,0.008692,0.024554,0.014646,0.167280,0.020501,0.015328,0.3…	101	123	424	646	na	na	0	na	na	0.1472	0.846327	524	546	124	3036	0	1	0	-1	0.137315	-1	FALSE
all	CSE1L_A375_gRNA981	A375	CSE1L	CAAAACGAGGCAGGTATCGCTGG	CCAGCGATACCTGCCTCGTTTTG	ENST00000262982	TACAAACTGATGATGAAGAGGAAGCCGGCTTATTGGAGCTCTTAAAATCCCAGATTTGTGATAATGCCGCACTCTATGCACAAAAGTACGATGAAGAATTCCAGCGATACCTGCCTCGTTTTGTTACAGCCATCTGGAATTTACTAGTTACAACGGGTCAAGAGGTTAAATATGATTTGTTGGTAAGTAATGCAATTCAATTTCTGGCTTCAGTTTGTGAGAG	aacccctaccaactggtcggggtttgaaac	-16.2	((((((.(((....))).)))))).....(((...(((........))).)))	-38.46	-1,-1,-1,-1,-1,-1,-1,-1,-1,-1,-1,1,0.364,0.636,1,1,1,0.545,0.182,0,0.914,1,1,0.457,0.274,0.092,0,0.275,0.092,0.275,0.461,0.276,0.461,0.461,0.369,0.74,0.555,0.74,0.37,0,0.093,0.093,0.464,1,1,1,0.561,0.842,0.281,0.187,0.189,0.189,0.284,0.379,0.379,0.288,0.383,0.383,0.479,0.383,0.581,0.678,1,0.775,0.859,0.196,0.196,0,0.098,0.392,0.296,0.099,0.099,0.198,0.79,0.601,0.601,0.301,0,0.301,0.1,0.944,0.601,…	0.766987,0.021272,0.234406,0.029425,0.985601,0.107084,0.043802,0.262469,0.144344,0.835973,0.342905,0.004039,0.048495,0.596683,0.181916,0.215806,0.461085,0.321291,0.175471,0.049285,0.602425,0.707321,0.861558,0.938266,0.954522,0.623523,0.299584,0.587860,0.352763,0.054687,0.868127,0.005185,0.024705,0.001241,0.294509,0.000640,0.003590,0.050121,0.005480,0.655189,0.003881,0.128555,0.200983,0.017157,0.4…	101	123	881	1103	na	na	0	na	na	0.275823	0.717703	981	1003	124	3036	0	1	0	-1	0.294198	-1	FALSE
all	CSE1L_A375_gRNA1747	A375	CSE1L	AACGGTGCGATTTCTGCAGCTGT	ACAGCTGCAGAAATCGCACCGTT	ENST00000262982	TAATCATCTTCAAGCTGAAAGTATTGTTGTTCATACTTACGCAGCTCATGCTCTTGAACGGCTCTTTACTATGCGAGGGCCTAACAATGCCACTCTCTTTACAGCTGCAGAAATCGCACCGTTTGTTGAGATTCTGCTAACAAACCTTTTCAAAGCTCTCACACTTCCTGGCTCTTCAGAAAATGAATATATTATGAAAGCTATCATGAGAAGTTTTTCTCTC	aacccctaccaactggtcggggtttgaaac	-18.4	((((((.(((....))).)))))).......((((((((.....)))).))))	-34.54	-1,-1,1,0.11,0.438,0.438,0.11,0.329,0.438,0.11,0.219,1,0.658,0,0,0.329,0.658,0.658,0.438,0.329,0.11,0.219,0.658,0.219,0.658,0.438,0.11,1,0.877,1,0.658,0.658,0.219,0.329,0.11,0,0.329,0.658,0.658,0.877,0.877,0.11,0.438,0,0.438,0.219,0.986,0.548,0.986,0.548,0.767,0.329,0.767,1,1,1,1,0.658,0.438,0.219,0.219,0,0,0,0.11,0,0.877,0.658,0.11,0.329,0.11,0.329,0.11,0.438,0.438,0.11,0,0.11,0,0,0.11,0.219,0.8…	0.667221,0.194136,0.229782,0.273817,0.984672,0.914945,0.266130,0.571626,0.190779,0.408166,0.359903,0.319438,0.029225,0.504244,0.138377,0.147302,0.261528,0.429806,0.234971,0.259174,0.893972,0.997840,0.271633,0.980208,0.209989,0.821121,0.747615,0.837881,0.253417,0.064858,0.184150,0.082013,0.400583,0.066013,0.555065,0.009414,0.069732,0.249040,0.108326,0.004103,0.012710,0.092782,0.056383,0.102195,0.3…	101	123	1647	1869	na	na	0	na	na	0.491416	0.502111	1747	1769	124	3036	0	1	0	-1	0.557158	-1	FALSE
all	CSE1L_A375_gRNA1952	A375	CSE1L	GTAGTGATTAAAGTGAGGTTTGC	GCAAACCTCACTTTAATCACTAC	ENST00000262982	ATGAGAAGTTTTTCTCTCCTACAAGAAGCCATAATCCCCTACATCCCTACTCTCATCACTCAGCTTACACAGAAGCTATTAGCTGTTAGTAAGAACCCAAGCAAACCTCACTTTAATCACTACATGTTTGAAGCAATATGTTTATCCATAAGAATAACTTGCAAAGCTAACCCTGCTGCTGTTGTAAATTTTGAGGAGGCTTTGTTTTTGGTGTTTACTGAAA	aacccctaccaactggtcggggtttgaaac	-13.4	((((((.(((....))).))))))..((((.((.(......).))..))))..	-36.63	-1,-1,-1,-1,-1,-1,-1,-1,-1,-1,-1,-1,-1,-1,-1,-1,-1,-1,-1,-1,-1,-1,-1,-1,-1,-1,-1,-1,-1,-1,-1,-1,-1,-1,-1,-1,-1,-1,-1,-1,-1,-1,-1,-1,-1,-1,-1,-1,-1,-1,-1,-1,-1,-1,-1,-1,-1,-1,-1,-1,-1,-1,-1,-1,-1,-1,-1,-1,-1,-1,-1,-1,-1,-1,-1,-1,-1,-1,-1,-1,-1,-1,-1,-1,-1,-1,-1,-1,-1,-1,-1,-1,-1,-1,-1,-1,-1,-1,-1,-1,-1,-1,-1,-1,-1,-1,-1,-1,-1,-1,-1,-1,-1,0.667,0.667,0.667,0.333,1,0.833,0.167,1,0,0.333,0.333,0.667,…	0.316775,0.205581,0.215232,0.947280,0.734739,0.241099,0.291752,0.730132,0.122271,0.843885,0.186718,0.004366,0.055919,0.970431,0.267118,0.336979,0.320126,0.268372,0.292289,0.582678,0.847393,0.945496,0.683165,0.918638,0.790810,0.930093,0.415853,0.949717,0.514562,0.159520,0.107364,0.006849,0.196879,0.013158,0.531709,0.044718,0.213878,0.365427,0.261350,0.047050,0.017463,0.009117,0.664382,0.023060,0.5…	101	123	1852	2074	na	na	0	na	na	0.549113	0.444413	1952	1974	124	3036	0	1	0	-1	0.627532	-1	FALSE
all	CSE1L_A375_gRNA2393	A375	CSE1L	GTCAACTGATTCAGGAGGCATGT	ACATGCCTCCTGAATCAGTTGAC	ENST00000262982	GCTGACAAAATTCCTGGGTTACTAGGTGTCTTTCAGAAGCTGATTGCATCCAAAGCAAATGACCACCAAGGTTTTTATCTTCTAAACAGTATAATAGAGCACATGCCTCCTGAATCAGTTGACCAATATAGGAAACAAATCTTCATTCTGCTATTCCAGAGACTTCAGAATTCCAAAACAACCAAGTTTATCAAGAGTTTTTTAGTCTTTATTAATTTGTATT	aacccctaccaactggtcggggtttgaaac	-17.4	((((((.(((....))).))))))......(((..(((...)))..)))....	-36.84	0.158,0,0.079,0.475,0.554,0.396,0.712,0.396,0.713,0.871,1,0,-1,-1,-1,-1,-1,-1,-1,-1,-1,-1,-1,-1,-1,-1,-1,-1,-1,-1,-1,-1,-1,-1,-1,-1,-1,-1,-1,-1,-1,-1,-1,-1,-1,-1,-1,0.211,0.422,0.317,0.528,0.739,1,0.63,0.315,0.944,1,1,0.731,0.522,0.731,0.836,0.312,0.416,0.312,0.312,0.52,1,0.207,0.622,0,0.622,0.834,0.209,0.521,0.626,0.417,0.524,0.21,0.21,0.105,0.105,0.209,1,0.94,0.313,0.418,0.734,0.524,0.419,0.419…	0.199457,0.303051,0.411799,0.403873,0.788808,0.840992,0.230668,0.859144,0.480063,0.367752,0.738610,0.038413,0.080927,0.940888,0.121266,0.453830,0.520446,0.660741,0.205018,0.889125,0.937453,0.997684,0.574462,0.935617,0.328683,0.809495,0.485329,0.896484,0.404916,0.121327,0.014903,0.018806,0.093830,0.043688,0.525404,0.012713,0.113396,0.258593,0.008525,0.100937,0.010023,0.008015,0.280800,0.024125,0.6…	101	123	2293	2515	na	na	0	na	na	0.673234	0.320293	2393	2415	124	3036	0	1	0	-1	0.778922	-1	FALSE
all	CSE1L_A375_gRNA2715	A375	CSE1L	AAGACTGTAATAATGGAGTCCAC	GTGGACTCCATTATTACAGTCTT	ENST00000262982	AGAAGGTATCTGGAAATGTAGAGAAAAAGATCTGTGCGGTTGGCATAACCAAATTACTAACAGAATGTCCCCCAATGATGGACACTGAGTATACCAAACTGTGGACTCCATTATTACAGTCTTTGATTGGTCTTTTTGAGTTACCCGAAGATGATACCATTCCTGATGAGGAACATTTTATTGACATAGAAGATACACCAGGATATCAGACTGCCTTCTCACA	aacccctaccaactggtcggggtttgaaac	-16.9	((((((.(((....))).))))))........((((.((....)).))))...	-31.01	0.568,0.227,0.341,0.114,0.114,0.568,0.114,0.795,0.227,0,0,0.227,0,1,0.568,0.454,0.454,0.908,0.568,0.227,0.227,0.681,0.681,0.341,1,1,1,0.341,0.341,0.227,0.227,0.114,0.341,0.227,0.908,0.227,0,0.114,0,0.114,0.227,0.681,0.341,0.454,0.681,1,0.227,0,0,0,0.681,1,0.454,0.341,0.227,0.454,0.568,0.568,0.341,0.792,0.339,0.226,0.792,1,1,0.563,0.451,0,0.113,0,0,0,0.225,1,0.677,0,0.226,0.226,0.226,0.113,0,0.339…	0.201904,0.228807,0.010373,0.615762,0.521161,0.054457,0.006697,0.287099,0.091271,0.989260,0.978382,0.000520,0.065383,0.977928,0.209173,0.022689,0.471062,0.542825,0.510294,0.270854,0.867782,0.679645,0.969357,0.779641,0.032895,0.902705,0.221021,0.250622,0.722604,0.583849,0.372951,0.001066,0.138356,0.026405,0.669085,0.217553,0.059148,0.154401,0.006271,0.707796,0.000210,0.041039,0.026339,0.014045,0.8…	101	123	2615	2837	na	na	0	na	na	0.763862	0.229665	2715	2737	124	3036	0	1	0	-1	0.889461	-1	FALSE
all	WDR75_A375_gRNA382	A375	WDR75	ACAGAATCCTCAGCTTGGGCAAG	CTTGCCCAAGCTGAGGATTCTGT	ENST00000314761	TTCTTGTTCCCTTGATGGCACAATTAAACTGTGGGACTATATAGATGGCATCTTAATAAAGACTTTCATAGTTGGATGTAAACTTCATGCCCTCTTTACTCTTGCCCAAGCTGAGGATTCTGTCTTTGTTATAGTGAATAAAGAAAAACCAGATATATTTCAGCTGGTTTCAGTGAAACTGCCAAAATCCTCAAGCCAGGAAGTAGAAGCCAAGGAGCTGTCC	aacccctaccaactggtcggggtttgaaac	-13.8	((((((.(((....))).))))))............(((.......)))....	-40.58	na	0.817718,0.220855,0.013185,0.429641,0.843302,0.441328,0.393308,0.763565,0.969674,0.340121,0.987932,0.215059,0.032975,0.818606,0.005331,0.962564,0.966673,0.795158,0.190008,0.970792,0.960802,0.705193,0.557393,0.940361,0.939782,0.812372,0.733359,0.974741,0.952660,0.205162,0.937033,0.162681,0.223732,0.110113,0.950786,0.575824,0.622384,0.405790,0.029155,0.770071,0.198946,0.001518,0.607751,0.610505,0.2…	101	123	282	504	na	na	0	na	na	0.141059	0.850426	382	404	61	2550	0	1	0	-1	0.128916	-1	FALSE
all	WDR75_A375_gRNA525	A375	WDR75	AGGCAATGCACTTGGGTGACTGG	CCAGTCACCCAAGTGCATTGCCT	ENST00000314761	AAAAACCAGATATATTTCAGCTGGTTTCAGTGAAACTGCCAAAATCCTCAAGCCAGGAAGTAGAAGCCAAGGAGCTGTCCTTTGTTTTGGATTACATAAACCAGTCACCCAAGTGCATTGCCTTTGGAAACGAGGGAGTATATGTTGCTGCAGTACGGGAATTTTACTTGTCTGTTTATTTTTTCAAAAAGAAAACAACATCAAGGTTTACTTTATCATCATC	aacccctaccaactggtcggggtttgaaac	-16.3	((((((.(((....))).)))))).....(((...((.(....).))..))).	-41.21	na	0.788163,0.077654,0.013607,0.811833,0.697530,0.533520,0.447957,0.807349,0.729613,0.445730,0.948839,0.026256,0.110446,0.987981,0.597112,0.807845,0.848505,0.684886,0.544869,0.357840,0.945072,0.655544,0.541670,0.727373,0.339554,0.970952,0.068017,0.800713,0.964567,0.331502,0.966840,0.164989,0.159725,0.236297,0.756836,0.653975,0.612065,0.134261,0.015524,0.619228,0.153815,0.716455,0.220683,0.669846,0.3…	101	123	425	647	na	na	0	na	na	0.194002	0.797482	525	547	61	2550	0	1	0	-1	0.186345	-1	FALSE
all	WDR75_A375_gRNA567	A375	WDR75	AAAATTCCCGTACTGCAGCAACA	TGTTGCTGCAGTACGGGAATTTT	ENST00000314761	AATCCTCAAGCCAGGAAGTAGAAGCCAAGGAGCTGTCCTTTGTTTTGGATTACATAAACCAGTCACCCAAGTGCATTGCCTTTGGAAACGAGGGAGTATATGTTGCTGCAGTACGGGAATTTTACTTGTCTGTTTATTTTTTCAAAAAGAAAACAACATCAAGGTTTACTTTATCATCATCAAGAAATAAGAAGCATGCTAAAAACAATTTTACATGTGTAGC	aacccctaccaactggtcggggtttgaaac	-12.8	((((((.(((....))).)))))).............................	-36.22	na	0.883038,0.298541,0.018962,0.533588,0.678225,0.437551,0.879265,0.963482,0.907914,0.158179,0.985206,0.217808,0.037660,0.912716,0.032706,0.665318,0.902787,0.887276,0.474724,0.868878,0.942355,0.637289,0.484265,0.781916,0.671761,0.966712,0.157609,0.984696,0.899440,0.108921,0.966999,0.548937,0.308486,0.371181,0.793219,0.778673,0.354081,0.218710,0.050177,0.582383,0.702393,0.101219,0.170744,0.876567,0.6…	101	123	467	689	na	na	0	na	na	0.209552	0.781933	567	589	61	2550	0	1	0	-1	0.203213	-1	FALSE
all	WDR75_A375_gRNA852	A375	WDR75	GTACAGATTCACGACCGCCACTC	GAGTGGCGGTCGTGAATCTGTAC	ENST00000314761	GGAATTTTTATGATGATAAGAAATATACGTACACATGTTTACATTGGCACCATGATATGGTTATGGATTTGGCTTTTTCAGTGACAGGCACCAGTCTGCTGAGTGGCGGTCGTGAATCTGTACTTGTAGAGTGGCGCGATGCAACAGAGAAGAATAAGGAGTTTCTCCCGCGTTTAGGAGCTACTATTGAACATATCTCAGTCTCGCCTGCAGGAGATTTATT	aacccctaccaactggtcggggtttgaaac	-13.9	.............(((((((((((((.......))))))).))))))......	-41.94	na	0.588259,0.444790,0.333338,0.841491,0.434383,0.225067,0.807373,0.727695,0.973758,0.623931,0.838610,0.126143,0.762910,0.973167,0.658823,0.978215,0.972372,0.356361,0.847677,0.850782,0.896069,0.313027,0.610342,0.439306,0.963737,0.414804,0.259404,0.842390,0.892448,0.423222,0.967236,0.402557,0.449530,0.317869,0.791199,0.836432,0.754186,0.225901,0.035510,0.869202,0.278500,0.312360,0.700534,0.740390,0.9…	101	123	752	974	na	na	0	na	na	0.315068	0.676416	852	874	61	2550	0	1	0	-1	0.317671	-1	FALSE
all	WDR75_A375_gRNA854	A375	WDR75	AAGTACAGATTCACGACCGCCAC	GTGGCGGTCGTGAATCTGTACTT	ENST00000314761	AATTTTTATGATGATAAGAAATATACGTACACATGTTTACATTGGCACCATGATATGGTTATGGATTTGGCTTTTTCAGTGACAGGCACCAGTCTGCTGAGTGGCGGTCGTGAATCTGTACTTGTAGAGTGGCGCGATGCAACAGAGAAGAATAAGGAGTTTCTCCCGCGTTTAGGAGCTACTATTGAACATATCTCAGTCTCGCCTGCAGGAGATTTATTCT	aacccctaccaactggtcggggtttgaaac	-13.5	.............(((((((((((((.........))))))).))))))....	-39.52	na	0.619459,0.415971,0.262044,0.853377,0.413051,0.224536,0.778878,0.747631,0.969140,0.573926,0.846934,0.081446,0.669894,0.973442,0.621072,0.985464,0.973644,0.297290,0.816727,0.851882,0.858411,0.292791,0.514928,0.487594,0.950070,0.419342,0.318312,0.814379,0.905076,0.362123,0.976790,0.549515,0.441017,0.326468,0.682145,0.856018,0.736046,0.276301,0.038637,0.871719,0.233867,0.255776,0.710979,0.823078,0.8…	101	123	754	976	na	na	0	na	na	0.315809	0.675676	854	876	61	2550	0	1	0	-1	0.318474	-1	FALSE
all	WDR75_A375_gRNA857	A375	WDR75	TACAAGTACAGATTCACGACCGC	GCGGTCGTGAATCTGTACTTGTA	ENST00000314761	TTTTATGATGATAAGAAATATACGTACACATGTTTACATTGGCACCATGATATGGTTATGGATTTGGCTTTTTCAGTGACAGGCACCAGTCTGCTGAGTGGCGGTCGTGAATCTGTACTTGTAGAGTGGCGCGATGCAACAGAGAAGAATAAGGAGTTTCTCCCGCGTTTAGGAGCTACTATTGAACATATCTCAGTCTCGCCTGCAGGAGATTTATTCTGCA	aacccctaccaactggtcggggtttgaaac	-14.2	.............(((((((((((((..(((...))).))))))).)))))).	-38.55	na	0.716196,0.488789,0.275769,0.844263,0.348768,0.231641,0.709980,0.709027,0.975048,0.653999,0.825388,0.144777,0.772705,0.935148,0.666147,0.990188,0.982695,0.234756,0.761193,0.862181,0.840507,0.282049,0.491089,0.357280,0.929926,0.597840,0.276665,0.657672,0.877349,0.304062,0.978594,0.599616,0.427677,0.292056,0.710277,0.869507,0.719873,0.278030,0.035511,0.843958,0.183500,0.255171,0.767667,0.745500,0.8…	101	123	757	979	na	na	0	na	na	0.31692	0.674565	857	879	61	2550	0	1	0	-1	0.319679	-1	FALSE
all	YAE1_A375_gRNA193	A375	YAE1	GAGTAACTGCTTTGCCAGCATCT	AGATGCTGGCAAAGCAGTTACTC	ENST00000223273	GGGACGTGTTTGACGAAGAAGCAGACGAGTCGCTCCTGGCGCAGCGGGAATGGCAGAGTAACATGCAAAGACGAGTCAAAGAAGGTTATAGAGATGGAATAGATGCTGGCAAAGCAGTTACTCTTCAACAGGGCTTCAATCAAGGTTATAAGAAAGGTGCAGAAGTCATTTTAAACTATGGACGACTCCGAGGAACATTGAGTGCTTTGCTCTCCTGGTGTCA	aacccctaccaactggtcggggtttgaaac	-15.1	((((((.(((....))).)))))).............((((.....))))...	-35.06	na	0.973150,0.013806,0.089660,0.901363,0.870091,0.017148,0.519076,0.368891,0.845717,0.995210,0.768945,0.034122,0.865979,0.989506,0.928220,0.951999,0.882532,0.434302,0.710265,0.922266,0.575865,0.363555,0.754482,0.569220,0.991609,0.980733,0.155787,0.981776,0.923683,0.922144,0.996741,0.839425,0.127676,0.113624,0.922218,0.621559,0.667845,0.119754,0.006205,0.183062,0.078095,0.071906,0.203043,0.555235,0.1…	101	123	93	315	na	na	0	na	na	0.213571	0.760845	193	215	44	721	0	1	0	-1	0.219764	-1	FALSE
all	YAE1_A375_gRNA194	A375	YAE1	AGAGTAACTGCTTTGCCAGCATC	GATGCTGGCAAAGCAGTTACTCT	ENST00000223273	GGACGTGTTTGACGAAGAAGCAGACGAGTCGCTCCTGGCGCAGCGGGAATGGCAGAGTAACATGCAAAGACGAGTCAAAGAAGGTTATAGAGATGGAATAGATGCTGGCAAAGCAGTTACTCTTCAACAGGGCTTCAATCAAGGTTATAAGAAAGGTGCAGAAGTCATTTTAAACTATGGACGACTCCGAGGAACATTGAGTGCTTTGCTCTCCTGGTGTCAC	aacccctaccaactggtcggggtttgaaac	-17.2	((((((.(((....))).)))))).....((((((....))))))........	-34.97	na	0.952451,0.018908,0.095572,0.949968,0.877745,0.016424,0.560682,0.352712,0.862969,0.996078,0.767846,0.038747,0.896267,0.996706,0.954334,0.963009,0.896427,0.481331,0.730120,0.919031,0.593286,0.370628,0.768859,0.609691,0.988729,0.981741,0.135263,0.985167,0.949418,0.940211,0.999029,0.826436,0.117441,0.119254,0.931764,0.605227,0.553346,0.109157,0.011436,0.192055,0.096519,0.067182,0.260374,0.473689,0.0…	101	123	94	316	na	na	0	na	na	0.214683	0.759733	194	216	44	721	0	1	0	-1	0.221239	-1	FALSE
all	YAE1_A375_gRNA195	A375	YAE1	AAGAGTAACTGCTTTGCCAGCAT	ATGCTGGCAAAGCAGTTACTCTT	ENST00000223273	GACGTGTTTGACGAAGAAGCAGACGAGTCGCTCCTGGCGCAGCGGGAATGGCAGAGTAACATGCAAAGACGAGTCAAAGAAGGTTATAGAGATGGAATAGATGCTGGCAAAGCAGTTACTCTTCAACAGGGCTTCAATCAAGGTTATAAGAAAGGTGCAGAAGTCATTTTAAACTATGGACGACTCCGAGGAACATTGAGTGCTTTGCTCTCCTGGTGTCACC	aacccctaccaactggtcggggtttgaaac	-15.1	((((((.(((....))).))))))...............((((.....)))).	-33.17	na	0.959307,0.017570,0.091287,0.956229,0.879942,0.016004,0.542607,0.322682,0.857048,0.994685,0.744619,0.029910,0.896472,0.995481,0.967469,0.965340,0.893204,0.452857,0.736328,0.926341,0.624192,0.369910,0.716122,0.661324,0.987242,0.978698,0.154930,0.985538,0.944587,0.916076,0.998724,0.730240,0.116076,0.121592,0.941666,0.606623,0.393903,0.138309,0.008888,0.254256,0.112618,0.064633,0.280598,0.525290,0.1…	101	123	95	317	na	na	0	na	na	0.215795	0.758621	195	217	44	721	0	1	0	-1	0.222714	-1	FALSE
all	YAE1_A375_gRNA196	A375	YAE1	GAAGAGTAACTGCTTTGCCAGCA	TGCTGGCAAAGCAGTTACTCTTC	ENST00000223273	ACGTGTTTGACGAAGAAGCAGACGAGTCGCTCCTGGCGCAGCGGGAATGGCAGAGTAACATGCAAAGACGAGTCAAAGAAGGTTATAGAGATGGAATAGATGCTGGCAAAGCAGTTACTCTTCAACAGGGCTTCAATCAAGGTTATAAGAAAGGTGCAGAAGTCATTTTAAACTATGGACGACTCCGAGGAACATTGAGTGCTTTGCTCTCCTGGTGTCACCT	aacccctaccaactggtcggggtttgaaac	-15.4	((((((.(((....))).)))))).....(((((........)))))......	-35.08	na	0.960954,0.017933,0.107926,0.959963,0.877552,0.015055,0.596495,0.302756,0.881139,0.993676,0.769504,0.031939,0.891007,0.996239,0.967184,0.946105,0.866945,0.441138,0.739748,0.927129,0.569173,0.353920,0.755669,0.627716,0.973114,0.988174,0.143249,0.983260,0.949817,0.928449,0.997862,0.756641,0.122655,0.117692,0.925052,0.602494,0.664186,0.152544,0.010297,0.209315,0.142222,0.081292,0.224270,0.589839,0.2…	101	123	96	318	na	na	0	na	na	0.216908	0.757508	196	218	44	721	0	1	0	-1	0.224189	-1	FALSE
all	YAE1_A375_gRNA246	A375	YAE1	GTTTAAAATGACTTCTGCACCTT	AAGGTGCAGAAGTCATTTTAAAC	ENST00000223273	CAGAGTAACATGCAAAGACGAGTCAAAGAAGGTTATAGAGATGGAATAGATGCTGGCAAAGCAGTTACTCTTCAACAGGGCTTCAATCAAGGTTATAAGAAAGGTGCAGAAGTCATTTTAAACTATGGACGACTCCGAGGAACATTGAGTGCTTTGCTCTCCTGGTGTCACCTTCATAATAATAATTCAACTTTGATCAATAAAATAAACAATCTTCTGGATG	aacccctaccaactggtcggggtttgaaac	-13.2	((((((.(((....))).))))))......(((......)))...........	-32.52	na	0.868451,0.026208,0.004123,0.803472,0.900626,0.124775,0.340213,0.647250,0.891386,0.994065,0.884745,0.098237,0.240445,0.984369,0.930469,0.981012,0.909910,0.634871,0.646004,0.916945,0.877292,0.422148,0.979120,0.804748,0.410204,0.979594,0.178210,0.967829,0.975987,0.490550,0.996817,0.583630,0.219518,0.067477,0.740292,0.719692,0.336506,0.238520,0.026856,0.287761,0.334204,0.338330,0.461832,0.508229,0.3…	101	123	146	368	na	na	0	na	na	0.272525	0.701891	246	268	44	721	0	1	0	-1	0.297935	-1	FALSE
all	YAE1_A375_gRNA655	A375	YAE1	GTTTAACTAAACTGGCTGTCTGT	ACAGACAGCCAGTTTAGTTAAAC	ENST00000223273	GTAGCAAGAGCCATAGTGGGATAGATTGTTCATATGTAGAATGTTGTAGAACACAGGAGCATGCACATTCAGAAAACCCAAGCCCCACATGGATTTTGGAACAGACAGCCAGTTTAGTTAAACAGCTGGGCCTATCAGTAGATGTATTACAACACCTCAAACAACTATAAAATTACCTTCCCTTTTCTAATGAAAATAATGTTCAGAACATTTGGTTTCCTAA	aacccctaccaactggtcggggtttgaaac	-12.9	((((((.(((....))).))))))......((((....))))...........	-35.57	na	0.695373,0.104936,0.060062,0.653577,0.428970,0.353651,0.205671,0.215971,0.889507,0.868333,0.945158,0.045211,0.337514,0.958158,0.067952,0.929398,0.889520,0.430295,0.725101,0.918562,0.481771,0.271770,0.642630,0.709743,0.721017,0.991584,0.313046,0.845792,0.897914,0.819064,0.846585,0.038054,0.380310,0.105111,0.578674,0.755842,0.327280,0.024658,0.021732,0.285807,0.003520,0.014158,0.224995,0.030789,0.4…	101	123	555	777	na	na	0	na	na	0.727475	0.246941	655	677	44	721	0	1	0	-1	0.90118	-1	FALSE
all	CCT2_A375_gRNA255	A375	CCT2	ATAAAAGAAGTCAGACGAGCTGT	ACAGCTCGTCTGACTTCTTTTAT	ENST00000299300	GGGGATTCACTTGTGTGCGGAACTCCTCGGAACCATGGCGTCCCTTTCCCTTGCACCTGTTAACATCTTTAAGGCAGGAGCTGATGAAGAGAGAGCAGAGACAGCTCGTCTGACTTCTTTTATTGGTGCCATCGCCATTGGAGACTTGGTAAAGAGCACCTTGGGACCCAAAGGCATGGACAAAATTCTTCTAAGCAGTGGACGAGATGCCTCTCTTATGGTA	aacccctaccaactggtcggggtttgaaac	-13.3	((((((.(((....))).)))))).................(((.....))).	-36	-1,-1,-1,-1,-1,-1,-1,-1,-1,-1,-1,-1,-1,-1,-1,-1,-1,-1,-1,-1,-1,-1,-1,-1,-1,-1,-1,-1,-1,-1,-1,-1,-1,-1,-1,-1,-1,-1,-1,-1,-1,-1,-1,-1,-1,-1,-1,-1,-1,-1,-1,-1,-1,-1,-1,-1,-1,-1,-1,-1,-1,-1,-1,-1,-1,-1,-1,-1,-1,-1,-1,-1,-1,-1,-1,-1,-1,-1,-1,-1,-1,-1,-1,-1,-1,-1,-1,-1,-1,-1,-1,-1,-1,-1,-1,-1,-1,-1,-1,-1,-1,-1,-1,-1,-1,-1,-1,-1,-1,-1,-1,-1,-1,-1,-1,-1,-1,-1,-1,-1,-1,-1,-1,-1,-1,-1,-1,-1,-1,-1,-1,-1,-1,…	0.695890,0.560809,0.812561,0.784397,0.262934,0.759546,0.737051,0.803021,0.723577,0.683121,0.079088,0.808831,0.025910,0.909782,0.151740,0.000842,0.148985,0.518499,0.737579,0.965283,0.815922,0.981789,0.589225,0.888258,0.756166,0.466167,0.427385,0.808389,0.818752,0.390983,0.119035,0.522965,0.825407,0.496585,0.706447,0.192956,0.385617,0.365541,0.851756,0.000229,0.464694,0.007564,0.340373,0.179580,0.5…	101	123	155	377	na	na	0	na	na	0.124449	0.864282	255	277	189	1793	0	1	0	-1	0.0411215	-1	FALSE
all	CCT2_A375_gRNA258	A375	CCT2	CCAATAAAAGAAGTCAGACGAGC	GCTCGTCTGACTTCTTTTATTGG	ENST00000299300	GATTCACTTGTGTGCGGAACTCCTCGGAACCATGGCGTCCCTTTCCCTTGCACCTGTTAACATCTTTAAGGCAGGAGCTGATGAAGAGAGAGCAGAGACAGCTCGTCTGACTTCTTTTATTGGTGCCATCGCCATTGGAGACTTGGTAAAGAGCACCTTGGGACCCAAAGGCATGGACAAAATTCTTCTAAGCAGTGGACGAGATGCCTCTCTTATGGTAACC	aacccctaccaactggtcggggtttgaaac	-12.8	((((((.(((....))).)))))).............................	-38.15	-1,-1,-1,-1,-1,-1,-1,-1,-1,-1,-1,-1,-1,-1,-1,-1,-1,-1,-1,-1,-1,-1,-1,-1,-1,-1,-1,-1,-1,-1,-1,-1,-1,-1,-1,-1,-1,-1,-1,-1,-1,-1,-1,-1,-1,-1,-1,-1,-1,-1,-1,-1,-1,-1,-1,-1,-1,-1,-1,-1,-1,-1,-1,-1,-1,-1,-1,-1,-1,-1,-1,-1,-1,-1,-1,-1,-1,-1,-1,-1,-1,-1,-1,-1,-1,-1,-1,-1,-1,-1,-1,-1,-1,-1,-1,-1,-1,-1,-1,-1,-1,-1,-1,-1,-1,-1,-1,-1,-1,-1,-1,-1,-1,-1,-1,-1,-1,-1,-1,-1,-1,-1,-1,-1,-1,-1,-1,-1,-1,-1,-1,-1,-1,…	0.595976,0.657525,0.751291,0.718861,0.323232,0.805956,0.738023,0.789359,0.833110,0.626997,0.076412,0.875006,0.029556,0.941100,0.115022,0.000914,0.176508,0.534215,0.816262,0.963073,0.867479,0.975081,0.620561,0.877198,0.766580,0.460455,0.466431,0.781006,0.809500,0.507501,0.118166,0.642040,0.935117,0.502949,0.710498,0.232694,0.429938,0.365296,0.898907,0.000258,0.556674,0.004899,0.409166,0.167370,0.6…	101	123	158	380	na	na	0	na	na	0.125919	0.862812	258	280	189	1793	0	1	0	-1	0.0429907	-1	FALSE
all	CCT2_A375_gRNA591	A375	CCT2	AACAGCGCCTCTCTTGCAGCCTT	AAGGCTGCAAGAGAGGCGCTGTT	ENST00000299300	TGTTACCGTTTTAGCAGCAGAATTATTAAGGGAAGCAGAATCTTTAATTGCAAAAAAGATTCATCCACAGACCATCATAGCGGGTTGGAGAGAAGCCACGAAGGCTGCAAGAGAGGCGCTGTTGAGTTCTGCAGTTGATCATGGTTCCGATGAAGTTAAATTCCGTCAAGATTTAATGAATATTGCGGGCACAACATTATCCTCAAAACTTCTTACTCATCAC	aacccctaccaactggtcggggtttgaaac	-14	((((((.(((....))).))))))..........((((.......)).))...	-40.3	-1,-1,-1,-1,-1,-1,-1,-1,-1,-1,-1,-1,-1,-1,-1,-1,-1,-1,-1,-1,-1,-1,-1,-1,-1,-1,-1,-1,-1,-1,-1,-1,-1,-1,-1,1,1,0.296,0.518,0.074,0.149,0.298,0.67,0.521,0.447,0.964,0.819,0.67,1,0.894,0.298,1,0.521,0.964,0.223,0.372,0.223,0.372,0.67,0.372,0.521,0.964,0.372,0.223,0.074,0.596,0.223,0.819,0.894,1,0.67,0.149,0.447,0.596,0.223,0.372,0.964,0.819,0.964,0.447,0.149,0.074,0.67,0.521,0.521,0,0.223,0.372,0.298…	0.220468,0.197233,0.104156,0.398825,0.335343,0.276308,0.171691,0.387776,0.299590,0.997434,0.786210,0.004541,0.588649,0.968690,0.600697,0.099437,0.454531,0.129569,0.234764,0.028164,0.648337,0.256279,0.082918,0.806946,0.921979,0.662773,0.356776,0.137221,0.269724,0.817172,0.854780,0.007598,0.453094,0.140629,0.038572,0.129176,0.022987,0.046064,0.019126,0.379498,0.000396,0.586414,0.290244,0.836568,0.7…	101	123	491	713	na	na	0	na	na	0.289074	0.699657	591	613	189	1793	0	1	0	-1	0.250467	-1	FALSE
all	CCT2_A375_gRNA960	A375	CCT2	GCAACCTTTGCTGTAGAGTCAAC	GTTGACTCTACAGCAAAGGTTGC	ENST00000299300	TGGAGTAAATCAACCAAAACGAATTGAAAATGCTAAAATTCTTATTGCAAATACTGGTATGGATACAGACAAAATAAAGATATTTGGTTCCCGGGTAAGAGTTGACTCTACAGCAAAGGTTGCAGAAATAGAACATGCGGAAAAGGAAAAAATGAAGGAGAAAGTTGAACGTATTCTTAAGCATGGAATAAATTGCTTTATTAACAGGCAATTAATTTATAAT	aacccctaccaactggtcggggtttgaaac	-14.7	((((((.(((....))).))))))......((((...))))............	-36	0.104,0.104,0.208,0.104,0.208,0.208,0.156,0.571,0.208,0.156,0.311,0.26,0.208,0.104,0.156,0.311,0.415,0.415,0.311,0.208,0.104,0.311,0.156,0.156,0.363,0.156,0.623,0.623,0.467,0.26,0.311,0.156,0.104,0.415,0.467,0.519,0.675,0.363,0.415,0.104,0.208,0.156,0.156,0.415,0.104,0.156,0.571,0.623,0.467,0.934,1,0.675,0.934,0.623,0.26,1,1,1,1,0.311,0.623,1,1,1,0.311,0.415,0.26,0.467,0.156,0,0.208,0.311,0.519,0…	0.965786,0.797300,0.841137,0.983789,0.819175,0.929873,0.894392,0.351155,0.994673,0.999826,0.924590,0.619834,0.707049,0.999937,0.902658,0.830840,0.591306,0.787116,0.962730,0.969688,0.908960,0.776519,0.906315,0.901661,0.999978,0.979648,0.971392,0.997294,0.980032,0.790787,0.995203,0.997449,0.219642,0.032796,0.999957,0.016622,0.630578,0.994225,0.055003,0.083252,0.858333,0.540258,0.575708,0.977859,0.9…	101	123	860	1082	na	na	0	na	na	0.469868	0.518863	960	982	189	1793	0	1	0	-1	0.480374	-1	FALSE
all	CCT2_A375_gRNA1081	A375	CCT2	ACCAAAGAGCTGTTCAGGATAAT	ATTATCCTGAACAGCTCTTTGGT	ENST00000299300	GCAGAAATAGAACATGCGGAAAAGGAAAAAATGAAGGAGAAAGTTGAACGTATTCTTAAGCATGGAATAAATTGCTTTATTAACAGGCAATTAATTTATAATTATCCTGAACAGCTCTTTGGTGCTGCTGGTGTCATGGCTATTGAGCATGCAGATTTTGCAGGTGTGGAACGCCTAGCTCTTGTCACAGGTGGTGAAATTGCCTCTACCTTTGATCACCCAG	aacccctaccaactggtcggggtttgaaac	-14.1	.(((((.(((....))).)))))(((((.((.(.....).)))))))......	-36.89	0.63,1,0.485,1,0.727,0.915,0.775,0.727,0.775,0.824,0.872,0.581,0.291,0.291,0.581,0.291,0.048,0.533,0.63,0.872,0.485,0.727,0.242,0.388,0.145,0.436,0.388,0.388,0.388,0.436,0.291,0.339,0.242,0.145,0,0.097,0.097,0.048,0.145,0.145,0.242,0.097,0.242,0.194,0.339,0.291,0.242,0.097,0.339,0.291,0.388,0.436,0.291,0.145,0.097,0.097,0.388,0.581,0.339,0.194,0,0.291,0,0.194,0.097,0.388,0.145,0.388,0.242,0.194,0…	0.682251,0.874474,0.145058,0.933146,0.259463,0.884543,0.498960,0.813268,0.916600,0.612817,0.998855,0.096985,0.054311,0.973995,0.165061,0.204632,0.549657,0.581903,0.774577,0.957900,0.954643,0.954159,0.815711,0.984364,0.492811,0.787874,0.843170,0.897899,0.989326,0.226610,0.919586,0.216108,0.587976,0.212842,0.969773,0.112639,0.440021,0.743284,0.783145,0.963238,0.001869,0.007937,0.265273,0.368133,0.3…	101	123	981	1203	na	na	0	na	na	0.529152	0.459579	1081	1103	189	1793	0	1	0	-1	0.555763	-1	FALSE
all	CCT2_A375_gRNA1737	A375	CCT2	GCCGCTTTGATGATGTTGTCCAC	GTGGACAACATCATCAAAGCGGC	ENST00000299300	CACCATTGGAGATATGGCTATCCTGGGTATAACAGAAAGTTTTCAAGTGAAGCGACAGGTTCTTCTGAGTGCAGCTGAAGCAGCAGAGGTGATTCTGCGTGTGGACAACATCATCAAAGCGGCACCCAGGAAACGTGTCCCTGATCACCACCCCTGTTAAGCATTCCCACGTGCTGTCGATCTTTGGACCAGTTTCTAGCAAAGTTGTGTTTGAAAGATACTC	aacccctaccaactggtcggggtttgaaac	-12.8	((((((.(((....))).)))))).............................	-41.41	0.027,0.081,0.081,0.027,0.241,0.08,0.134,0.053,0.321,0.292,0.319,0.292,0.212,0.239,0.132,0.317,0.106,0.343,0.449,0.472,0.236,0,0.236,0.079,0.104,0.157,0.209,0.313,0.339,0.391,0.47,0.443,0.13,0.313,0.183,0.626,0.496,0.391,0.183,0.47,0.859,0.261,0.6,0.752,0.775,0.957,0.443,0.47,0.652,0.899,0.47,0.104,0.209,0.235,0.183,0.13,0.157,0.443,0.313,0.391,0.391,0.919,0.261,0.183,0.183,0.261,0.313,0.183,0.31…	0.614332,0.592624,0.077821,0.045385,0.312970,0.188296,0.048778,0.141103,0.141472,0.987944,0.083716,0.081278,0.236526,0.406384,0.416642,0.599665,0.482229,0.118648,0.279279,0.005792,0.339404,0.519838,0.113796,0.325414,0.172902,0.253900,0.099250,0.450271,0.079540,0.343982,0.697306,0.102976,0.526477,0.022046,0.803021,0.050495,0.003807,0.128406,0.177902,0.071359,0.043292,0.237253,0.036610,0.533258,0.6…	101	123	1637	1859	na	na	0	na	na	0.850563	0.138168	1737	1759	189	1793	0	1	0	-1	0.964486	-1	FALSE
all	NARS1_A375_gRNA936	A375	NARS1	AGCACTGACACAACTCATCCGCC	GGCGGATGAGTTGTGTCAGTGCT	ENST00000256854	GAGTAAAGGTGTTTGGCTGGGTCCACAGGCTGCGCAGGCAAGGAAAGAATTTAATGTTTCTGGTGTTGCGAGATGGTACAGGTTATCTTCAGTGTGTCTTGGCGGATGAGTTGTGTCAGTGCTACAATGGAGTTCTCTTGTCCACGGAGAGCAGTGTTGCAGTGTATGGAATGCTAAATCTTACCCCAAAGGGCAAGCAGGCTCCAGGTGGCCATGAGCTGAG	aacccctaccaactggtcggggtttgaaac	-13.2	((((((.(((....))).)))))).......((..(((......)))...)).	-40.59	-1,-1,-1,-1,-1,-1,-1,-1,-1,-1,-1,-1,-1,-1,-1,-1,-1,-1,-1,-1,-1,-1,-1,-1,-1,-1,-1,-1,-1,-1,-1,-1,-1,-1,-1,-1,-1,-1,-1,-1,-1,-1,-1,-1,-1,-1,-1,-1,-1,-1,-1,-1,-1,-1,-1,-1,-1,-1,-1,-1,-1,-1,-1,-1,-1,-1,-1,-1,-1,-1,-1,-1,-1,-1,-1,-1,-1,-1,-1,-1,-1,-1,-1,-1,-1,-1,-1,-1,-1,-1,-1,-1,-1,-1,-1,-1,-1,-1,-1,-1,-1,-1,-1,-1,-1,-1,-1,-1,-1,-1,-1,-1,-1,-1,-1,-1,-1,-1,-1,-1,-1,-1,-1,-1,-1,-1,-1,-1,-1,-1,-1,-1,-1,…	0.612840,0.874172,0.737242,0.586908,0.294616,0.509227,0.853275,0.821571,0.905565,0.587169,0.320310,0.964364,0.112390,0.814736,0.205501,0.000012,0.092874,0.540978,0.844182,0.863810,0.858975,0.943907,0.574398,0.958837,0.700896,0.037517,0.626652,0.961140,0.877269,0.342868,0.121440,0.711485,0.949588,0.628947,0.924727,0.250687,0.699791,0.720629,0.937713,0.000522,0.877370,0.128039,0.420323,0.467387,0.5…	101	123	836	1058	na	na	0	na	na	0.30171	0.690868	936	958	457	2100	0	1	0	-1	0.291363	-1	FALSE
all	NARS1_A375_gRNA1199	A375	NARS1	GCACCTGGTGACCATGGATCGTG	CACGATCCATGGTCACCAGGTGC	ENST00000256854	GGAGCTGACAACCTGATCAATGAGGAGTCTGACGTTGATGTCCAGCTCAACAACAGACACATGATGATCCGAGGAGAAAACATGTCCAAAATCCTAAAAGCACGATCCATGGTCACCAGGTGCTTTAGAGATCACTTCTTTGATAGGGGGTACTATGAAGTTACTCCTCCAACATTAGTGCAAACACAAGTAGAAGGTGGTGCCACACTCTTCAAGCTTGACT	aacccctaccaactggtcggggtttgaaac	-18.3	((((((.(((....))).))))))....(((..(((((...))).))..))).	-41.4	-1,-1,-1,-1,-1,-1,-1,-1,-1,-1,-1,-1,-1,-1,-1,-1,-1,-1,-1,-1,-1,-1,-1,-1,0.931,1,0,0,0,0,0,0,0.311,0.156,0.312,0.312,0.312,0.78,1,0.933,0.311,0.467,0.156,0.623,0.312,0,0.312,0,0.312,0,0,0.156,0.156,0.156,0.313,0,0.156,0.156,0.312,0.156,0,0.312,0.156,0.468,0,0.156,0.624,0.156,0,0.624,0.468,-1,-1,-1,-1,-1,-1,-1,0.468,0,0.156,-1,-1,-1,-1,-1,-1,-1,-1,0.155,0,0.311,0,0,0.155,0.62,1,0.31,0,0.155,0,0,0.1…	0.235311,0.073235,0.086382,0.423469,0.447661,0.136179,0.053525,0.244794,0.233436,0.918311,0.139906,0.022536,0.017675,0.993543,0.124636,0.119546,0.041984,0.304519,0.302465,0.024756,0.848496,0.938366,0.156130,0.786679,0.433490,0.337188,0.114808,0.141418,0.091998,0.018225,0.105668,0.087545,0.518565,0.012886,0.036525,0.014210,0.019816,0.000250,0.136748,0.009218,0.016362,0.047206,0.055863,0.008431,0.3…	101	123	1099	1321	na	na	0	na	na	0.386576	0.606002	1199	1221	457	2100	0	1	0	-1	0.451338	-1	FALSE
all	NARS1_A375_gRNA1240	A375	NARS1	GTAACTTCATAGTACCCCCTATC	GATAGGGGGTACTATGAAGTTAC	ENST00000256854	CCAGCTCAACAACAGACACATGATGATCCGAGGAGAAAACATGTCCAAAATCCTAAAAGCACGATCCATGGTCACCAGGTGCTTTAGAGATCACTTCTTTGATAGGGGGTACTATGAAGTTACTCCTCCAACATTAGTGCAAACACAAGTAGAAGGTGGTGCCACACTCTTCAAGCTTGACTATTTTGGGGAAGAGGCATTTTTGACTCAATCCTCTCAGTTG	aacccctaccaactggtcggggtttgaaac	-13.2	((((((.(((....))).))))))......(((.((....)))))........	-36.72	0.467,0.156,0.623,0.312,0,0.312,0,0.312,0,0,0.156,0.156,0.156,0.313,0,0.156,0.156,0.312,0.156,0,0.312,0.156,0.468,0,0.156,0.624,0.156,0,0.624,0.468,-1,-1,-1,-1,-1,-1,-1,0.468,0,0.156,-1,-1,-1,-1,-1,-1,-1,-1,0.155,0,0.311,0,0,0.155,0.62,1,0.31,0,0.155,0,0,0.155,0.309,0.463,0.309,0,0.309,0.154,0.308,0,0,0.308,-1,-1,0,0.154,-1,-1,-1,-1,-1,-1,-1,-1,-1,-1,-1,-1,-1,-1,-1,-1,-1,-1,-1,-1,-1,-1,-1,-1,-1,-…	0.592418,0.581418,0.258666,0.140046,0.468252,0.597494,0.067633,0.683094,0.438763,0.670504,0.074756,0.261670,0.034573,0.986194,0.440975,0.008361,0.014382,0.407350,0.480695,0.300762,0.848163,0.977776,0.294002,0.932243,0.223816,0.605315,0.101443,0.724866,0.381985,0.527564,0.024323,0.056286,0.314626,0.507804,0.426632,0.027377,0.088943,0.015848,0.461366,0.000169,0.060192,0.020054,0.137483,0.016178,0.3…	101	123	1140	1362	na	na	0	na	na	0.399806	0.592772	1240	1262	457	2100	0	1	0	-1	0.476277	-1	FALSE
all	NARS1_A375_gRNA1738	A375	NARS1	ATTGGTTCATTAATGGTGTCTGT	ACAGACACCATTAATGAACCAAT	ENST00000256854	AGATGCTATCGTTTGGCTAAAAGAACATGATGTAAAGAAAGAAGATGGAACTTTCTATGAATTTGGAGAAGATATCCCAGAAGCTCCTGAGAGACTGATGACAGACACCATTAATGAACCAATCTTGCTGTGTCGATTTCCTGTGGAGATCAAGTCCTTCTACATGCAGCGATGTCCTGAGGATTCCCGTCTTACTGAATCTGTCGACGTGTTGATGCCCAAT	aacccctaccaactggtcggggtttgaaac	-14.6	((((((.(((....))).)))))).....(((((......)))))........	-35.24	-1,-1,-1,-1,-1,-1,-1,-1,-1,-1,-1,-1,-1,-1,-1,-1,-1,-1,-1,-1,-1,-1,-1,-1,-1,-1,-1,-1,-1,-1,-1,-1,-1,-1,-1,-1,-1,-1,-1,-1,-1,-1,-1,-1,-1,-1,-1,-1,-1,-1,-1,-1,-1,-1,-1,-1,-1,-1,-1,-1,-1,-1,-1,-1,-1,-1,-1,-1,-1,-1,1,1,0.833,0.5,0.168,0,0.505,0,0.168,0.68,0.17,0.34,0,0,0,0,0.171,0.343,0.171,0,0.345,0.173,0.173,0.173,0.174,0,0.696,0,0.174,0.525,0,0,0.175,-1,-1,-1,-1,-1,-1,-1,-1,-1,-1,-1,-1,-1,-1,-1,-1,…	0.071750,0.229149,0.122571,0.093486,0.136991,0.107561,0.005813,0.076965,0.069804,0.945211,0.187506,0.001345,0.004599,0.993577,0.902376,0.013563,0.070399,0.037021,0.408032,0.007049,0.784472,0.704156,0.112636,0.477453,0.019336,0.287465,0.126627,0.425986,0.354976,0.088672,0.955599,0.005822,0.057716,0.003150,0.002835,0.000087,0.001049,0.002160,0.001200,0.144568,0.005975,0.069300,0.221431,0.010331,0.7…	101	123	1638	1860	na	na	0	na	na	0.560503	0.432075	1738	1760	457	2100	0	1	0	-1	0.779197	-1	FALSE
all	NARS1_A375_gRNA1800	A375	NARS1	AATCCTCAGGACATCGCTGCATG	CATGCAGCGATGTCCTGAGGATT	ENST00000256854	TTGGAGAAGATATCCCAGAAGCTCCTGAGAGACTGATGACAGACACCATTAATGAACCAATCTTGCTGTGTCGATTTCCTGTGGAGATCAAGTCCTTCTACATGCAGCGATGTCCTGAGGATTCCCGTCTTACTGAATCTGTCGACGTGTTGATGCCCAATGTTGGTGAGATTGTGGGAGGCTCAATGCGTATCTTTGATAGTGAAGAAATACTGGCAGGTTA	aacccctaccaactggtcggggtttgaaac	-13.7	((((((.(((....))).))))))............(((.......)))....	-40.37	-1,-1,-1,-1,-1,-1,-1,-1,1,1,0.833,0.5,0.168,0,0.505,0,0.168,0.68,0.17,0.34,0,0,0,0,0.171,0.343,0.171,0,0.345,0.173,0.173,0.173,0.174,0,0.696,0,0.174,0.525,0,0,0.175,-1,-1,-1,-1,-1,-1,-1,-1,-1,-1,-1,-1,-1,-1,-1,-1,-1,-1,-1,-1,-1,-1,-1,-1,-1,-1,-1,-1,-1,-1,-1,0.175,0.175,0.35,0.175,0.35,0,0,0,1,0.175,0.175,0,0,0.175,0.175,0,0.175,0.35,1,0.525,0,0,0,0.35,0.175,0.175,0,0,0.35,0.525,0.175,0,0.35,-1,-1…	0.786295,0.629860,0.206162,0.115926,0.870285,0.153682,0.096882,0.644665,0.443951,0.846957,0.248419,0.132095,0.047298,0.966583,0.871908,0.058045,0.104330,0.292697,0.845544,0.077538,0.759088,0.922545,0.305351,0.976463,0.015833,0.276206,0.117160,0.405848,0.701479,0.842794,0.879199,0.089399,0.748625,0.014838,0.474001,0.056745,0.015768,0.295546,0.022995,0.263436,0.017334,0.704786,0.636031,0.042402,0.7…	101	123	1700	1922	na	na	0	na	na	0.58051	0.412068	1800	1822	457	2100	0	1	0	-1	0.81691	-1	FALSE
all	NARS1_A375_gRNA1808	A375	NARS1	AAGACGGGAATCCTCAGGACATC	GATGTCCTGAGGATTCCCGTCTT	ENST00000256854	GATATCCCAGAAGCTCCTGAGAGACTGATGACAGACACCATTAATGAACCAATCTTGCTGTGTCGATTTCCTGTGGAGATCAAGTCCTTCTACATGCAGCGATGTCCTGAGGATTCCCGTCTTACTGAATCTGTCGACGTGTTGATGCCCAATGTTGGTGAGATTGTGGGAGGCTCAATGCGTATCTTTGATAGTGAAGAAATACTGGCAGGTTATAAAAGGG	aacccctaccaactggtcggggtttgaaac	-14.2	((((((.(((....))).))))))........((.((....))))........	-39.13	1,1,0.833,0.5,0.168,0,0.505,0,0.168,0.68,0.17,0.34,0,0,0,0,0.171,0.343,0.171,0,0.345,0.173,0.173,0.173,0.174,0,0.696,0,0.174,0.525,0,0,0.175,-1,-1,-1,-1,-1,-1,-1,-1,-1,-1,-1,-1,-1,-1,-1,-1,-1,-1,-1,-1,-1,-1,-1,-1,-1,-1,-1,-1,-1,-1,-1,0.175,0.175,0.35,0.175,0.35,0,0,0,1,0.175,0.175,0,0,0.175,0.175,0,0.175,0.35,1,0.525,0,0,0,0.35,0.175,0.175,0,0,0.35,0.525,0.175,0,0.35,-1,-1,-1,-1,-1,-1,-1,-1,-1,-1…	0.737050,0.532069,0.158155,0.121507,0.849409,0.253203,0.171916,0.622752,0.207322,0.727606,0.194999,0.146843,0.028678,0.979575,0.809090,0.040255,0.129786,0.374041,0.756134,0.129891,0.782357,0.935501,0.311937,0.954497,0.012926,0.324851,0.105568,0.146728,0.312016,0.758211,0.887931,0.037737,0.653253,0.028080,0.198011,0.059738,0.019849,0.227992,0.041100,0.078846,0.019055,0.840396,0.729315,0.039023,0.4…	101	123	1708	1930	na	na	0	na	na	0.583091	0.409487	1808	1830	457	2100	0	1	0	-1	0.821776	-1	FALSE
all	COPA_A375_gRNA585	A375	COPA	GTTCTAGATTGCCAGTTCCACAC	GTGTGGAACTGGCAATCTAGAAC	ENST00000241704	TCTTTTCACATTGCTTGGGCACTTAGATTATATTCGCACCACGTTTTTTCATCATGAATATCCCTGGATTCTGAGTGCCTCCGATGATCAGACCATCCGAGTGTGGAACTGGCAATCTAGAACCTGTGTTTGTGTGTTAACAGGGCACAACCATTATGTGATGTGTGCTCAGTTCCACCCCACAGAAGACTTGGTAGTATCAGCCAGCCTGGACCAGACTGTG	aacccctaccaactggtcggggtttgaaac	-12.8	((((((.(((....))).)))))).............................	-39.36	-1,-1,-1,-1,-1,-1,-1,-1,-1,-1,-1,-1,-1,-1,-1,-1,-1,-1,-1,-1,-1,-1,-1,-1,-1,-1,-1,-1,-1,-1,-1,-1,-1,-1,-1,-1,-1,-1,-1,-1,-1,-1,-1,-1,-1,-1,-1,-1,-1,-1,-1,-1,-1,-1,-1,-1,-1,-1,-1,-1,-1,-1,-1,-1,-1,-1,-1,-1,-1,-1,-1,-1,-1,-1,-1,-1,-1,-1,-1,-1,-1,-1,-1,-1,-1,-1,-1,-1,-1,-1,-1,-1,-1,-1,-1,-1,-1,-1,-1,-1,-1,-1,-1,-1,-1,-1,-1,-1,-1,-1,-1,-1,-1,-1,-1,-1,-1,-1,-1,-1,-1,-1,-1,-1,-1,-1,-1,-1,-1,-1,-1,-1,-1,…	0.561961,0.735297,0.616269,0.326127,0.585729,0.384420,0.780222,0.819613,0.798011,0.721895,0.160820,0.882028,0.010931,0.961470,0.266778,0.000187,0.067339,0.615234,0.815020,0.776021,0.881251,0.967244,0.518039,0.946797,0.448312,0.780518,0.446138,0.890113,0.887689,0.199199,0.116763,0.411966,0.583503,0.535517,0.641709,0.315572,0.302481,0.708729,0.903157,0.029216,0.643892,0.056184,0.462530,0.378216,0.6…	101	123	485	707	na	na	0	na	na	0.121946	0.873251	585	607	231	3902	0	1	0	-1	0.0964052	-1	FALSE
all	COPA_A375_gRNA1867	A375	COPA	GACAGCATATTTGATGTGGTTGC	GCAACCACATCAAATATGCTGTC	ENST00000241704	ATCTGTAACCGCAAACTGGATGCTTTATGTAACATTCATGAGAACATTCGTGTCAAGAGTGGGGCCTGGGATGAGAGTGGGGTATTTATCTATACCACAAGCAACCACATCAAATATGCTGTCACCACTGGGGACCACGGGATCATTCGAACTCTGGATTTACCCATCTATGTCACACGGGTGAAGGGCAACAATGTATACTGCCTAGACAGGGAGTGTCGTC	aacccctaccaactggtcggggtttgaaac	-18.7	((((((.(((....))).))))))...(((.(((.((....)).))).)))..	-34.72	0.205,0.102,0.154,0.051,0.664,0.715,0.46,0.204,0.102,0.356,0.051,0.102,0.153,0.254,0.254,0.152,0.102,0.254,0.304,0.203,0.101,0.355,0,0.202,0.202,0.404,0.506,0.506,0.555,0.353,0.908,0.252,0.353,0.202,0.303,0.151,0.555,0.706,0.252,1,0.505,0.555,0.908,0.404,0.757,0.656,1,0.505,0.555,0.303,1,1,0.605,0.555,1,0.757,1,1,0.858,0.454,0.101,0.101,0.252,1,0.202,0.252,0.202,0.303,0.505,0.656,1,0.605,0.151,0.…	0.919484,0.147965,0.207299,0.580759,0.929406,0.813882,0.145778,0.086658,0.303868,0.775786,0.721359,0.098137,0.160402,0.839409,0.639793,0.107149,0.231066,0.620636,0.032560,0.361367,0.798310,0.818674,0.266874,0.841845,0.034064,0.902014,0.458042,0.729843,0.586869,0.325972,0.684779,0.187676,0.195199,0.130108,0.053948,0.226491,0.054510,0.049034,0.021179,0.103911,0.092253,0.521424,0.067789,0.020942,0.4…	101	123	1767	1989	na	na	0	na	na	0.389643	0.605554	1867	1889	231	3902	0	1	0	-1	0.445534	-1	FALSE
all	COPA_A375_gRNA3211	A375	COPA	CAGGCCCACAGCTGGTACACCAT	ATGGTGTACCAGCTGTGGGCCTG	ENST00000241704	CAGACATACGCCCGAGGCCGCACAACCTATCAGGCTCTGCCCTGCCTACCCTCCATGTATGGCTATCCTAATCGCAACTGGAAGGATGCAGGGCTGAAGAATGGTGTACCAGCTGTGGGCCTGAAGCTTAATGACCTCATCCAACGGTTGCAGCTGTGCTACCAGCTCACCACAGTTGGCAAATTTGAGGAGGCTGTGGAAAAATTCCGTTCCATCCTTCTCA	aacccctaccaactggtcggggtttgaaac	-19.7	((((((.(((....))).))))))....(((((........))))).......	-39.8	0.074,0.074,0.662,0.294,0.074,0.441,0.588,0.221,0.221,0.221,0.074,0.074,0.294,0.294,0.147,0.221,0,0.074,0.074,0,0.147,0,0.588,0.221,0.074,0.074,0.074,0.368,0.588,0.074,0.294,0.147,0.221,0.147,0.074,0.074,0,0.221,0.074,0,0,0,0.074,0.074,0,0.147,0.22,0.294,0.073,0,0,0,0,0.22,0,0.366,0,0.219,0.796,0.511,0.794,0.292,0.584,0.292,0.655,0.954,0.364,0.291,0.904,1,0.724,0.51,0.851,0.437,0.146,0.585,0.22,0…	0.221316,0.780723,0.541316,0.167626,0.484259,0.578552,0.495525,0.098575,0.738175,0.992176,0.905914,0.077905,0.205340,0.592103,0.705370,0.283318,0.095606,0.197353,0.066041,0.301284,0.787983,0.453496,0.116238,0.673364,0.404288,0.550003,0.706094,0.047604,0.546224,0.330012,0.469030,0.198852,0.782515,0.044411,0.783339,0.050635,0.051647,0.436258,0.297367,0.170616,0.199338,0.148829,0.120703,0.698108,0.3…	101	123	3111	3333	na	na	0	na	na	0.670286	0.324911	3211	3233	231	3902	0	1	0	-1	0.811547	-1	FALSE
all	COPA_A375_gRNA3689	A375	COPA	CATAATTGAGCTGGTAGGCATCT	AGATGCCTACCAGCTCAATTATG	ENST00000241704	CAGCTGCCACCTTTGCTCGGCGCCTACTAGAACTCGGGCCCAAGCCTGAGGTGGCCCAACAGACCCGAAAAATCCTGTCTGCCTGTGAGAAGAATCCCACAGATGCCTACCAGCTCAATTATGACATGCACAACCCCTTTGACATTTGTGCTGCATCATATCGGCCCATCTACCGTGGAAAGCCAGTAGAAAAGTGTCCACTCAGTGGGGCCTGCTATTCCCC	aacccctaccaactggtcggggtttgaaac	-15.5	((((((.(((....))).)))))).............(((((....))).)).	-35.84	0.425,0.856,0.416,0.555,1,0.231,0,0.137,0.091,0,0.137,0.181,0.497,0.925,0.09,0.316,0.089,0.045,0.045,0.045,0.67,0.398,0.088,0.177,0.265,0.53,0.524,1,1,1,1,1,1,0.652,0.217,0,0.044,0,0.087,0.044,0.174,0.218,0.087,0,0.044,0.175,0.306,0.306,0.044,0.087,0.131,0.044,0.044,0,0.438,0.219,0.22,0.571,0.22,0,0.088,-1,0.593,0.323,0.323,0.97,1,0.913,1,1,1,1,0.968,0.753,0.323,0.807,0.54,0.54,0.108,0.324,0.486,…	0.020241,0.076583,0.062132,0.029191,0.172824,0.046887,0.180337,0.246363,0.100910,0.884513,0.684177,0.002791,0.105828,0.942816,0.968996,0.871416,0.086856,0.097540,0.215437,0.029976,0.629617,0.692574,0.617985,0.711208,0.041284,0.364089,0.187322,0.078726,0.332553,0.700938,0.766480,0.001670,0.204969,0.009409,0.183521,0.000019,0.000799,0.002064,0.020606,0.127301,0.000015,0.057207,0.108619,0.595956,0.3…	101	123	3589	3811	na	na	0	na	na	0.770098	0.225099	3689	3711	231	3902	0	1	0	-1	0.941721	-1	FALSE
all	COPA_A375_gRNA3712	A375	COPA	AATGTCAAAGGGGTTGTGCATGT	ACATGCACAACCCCTTTGACATT	ENST00000241704	CTACTAGAACTCGGGCCCAAGCCTGAGGTGGCCCAACAGACCCGAAAAATCCTGTCTGCCTGTGAGAAGAATCCCACAGATGCCTACCAGCTCAATTATGACATGCACAACCCCTTTGACATTTGTGCTGCATCATATCGGCCCATCTACCGTGGAAAGCCAGTAGAAAAGTGTCCACTCAGTGGGGCCTGCTATTCCCCTGAGTTCAAAGGTCAAATCTGCA	aacccctaccaactggtcggggtttgaaac	-16.8	((((((.(((....))).))))))....(((((.((...)).)))))......	-37.59	0.177,0.265,0.53,0.524,1,1,1,1,1,1,0.652,0.217,0,0.044,0,0.087,0.044,0.174,0.218,0.087,0,0.044,0.175,0.306,0.306,0.044,0.087,0.131,0.044,0.044,0,0.438,0.219,0.22,0.571,0.22,0,0.088,-1,0.593,0.323,0.323,0.97,1,0.913,1,1,1,1,0.968,0.753,0.323,0.807,0.54,0.54,0.108,0.324,0.486,0.271,0.163,0.108,0.217,0.108,0.272,0.761,0.272,0.972,0.435,1,1,1,0.382,0.164,0.11,0.166,0.11,0.166,0.055,0.112,0.502,0.223,…	0.008806,0.104712,0.064695,0.106669,0.848664,0.067719,0.064098,0.254749,0.043717,0.613930,0.360758,0.000970,0.111894,0.979292,0.923507,0.510373,0.312688,0.138981,0.022265,0.015940,0.574804,0.707039,0.389488,0.849417,0.004735,0.177535,0.078919,0.086150,0.274680,0.663684,0.539395,0.001026,0.697107,0.010715,0.018448,0.000882,0.000282,0.000134,0.012293,0.401691,0.000042,0.035705,0.483415,0.018902,0.2…	101	123	3612	3834	na	na	0	na	na	0.774901	0.220297	3712	3734	231	3902	0	1	0	-1	0.947985	-1	FALSE
all	COPA_A375_gRNA3781	A375	COPA	GCAGGCCCCACTGAGTGGACACT	AGTGTCCACTCAGTGGGGCCTGC	ENST00000241704	AATCCCACAGATGCCTACCAGCTCAATTATGACATGCACAACCCCTTTGACATTTGTGCTGCATCATATCGGCCCATCTACCGTGGAAAGCCAGTAGAAAAGTGTCCACTCAGTGGGGCCTGCTATTCCCCTGAGTTCAAAGGTCAAATCTGCAGGGTCACCACAGTGACAGAGATTGGCAAAGATGTGATTGGTTTAAGGATCAGTCCTCTGCAGTTTCGCT	aacccctaccaactggtcggggtttgaaac	-18	........(((.(((((.((((((((.....))))))))))).))))).....	-40.97	1,1,0.382,0.164,0.11,0.166,0.11,0.166,0.055,0.112,0.502,0.223,0.223,0.112,0.338,0.619,0.788,0.169,0.45,0.227,0.454,0.398,0.17,0.511,0.286,0.63,0.401,0.63,0.401,0.577,0.52,0.115,0.346,0.404,0.756,0.233,0.291,0,0.116,0.979,0.176,0,0.117,0,0.118,0.471,0.177,0.236,0.648,0.296,0.415,0.415,0.711,0.296,0.357,0,0.238,0.06,0.06,0,0.24,0.24,0.24,0.24,0.181,0.181,0.241,0.602,0.06,0.12,0.12,0.12,0.12,0,0.241…	0.124564,0.350374,0.384735,0.879951,0.043914,0.706924,0.029654,0.015898,0.245676,0.901946,0.827753,0.001820,0.065297,0.929862,0.125394,0.205734,0.102450,0.555282,0.179797,0.067209,0.799034,0.699221,0.292796,0.780249,0.024987,0.217082,0.380111,0.009749,0.995019,0.034372,0.587760,0.109290,0.809156,0.053385,0.510096,0.149364,0.010209,0.048434,0.050036,0.478205,0.021883,0.003749,0.799280,0.277779,0.3…	101	123	3681	3903	na	na	0	na	na	0.789309	0.205888	3781	3803	231	3902	0	1	0	-1	0.966776	-1	FALSE
all	PSMA2_A375_gRNA245	A375	PSMA2	TTGGTTCTACTTTGTGTACACTT	AAGTGTACACAAAGTAGAACCAA	ENST00000223321	CTGCTGTAGCTGGAGGAGCCCCGTCCGTGGGAATTAAAGCTGCAAATGGTGTGGTATTAGCAACTGAGAAAAAACAGAAATCCATTCTGTATGATGAGCGAAGTGTACACAAAGTAGAACCAATTACCAAGCATATAGGTTTGGTGTACAGTGGCATGGGCCCCGATTACAGAGTGCTTGTGCACAGAGCTCGAAAACTAGCTCAACAATACTATCTTGTGTA	aacccctaccaactggtcggggtttgaaac	-13.3	((((((.(((....))).))))))........(((..(((.....))).))).	-33.51	-1,-1,-1,-1,-1,-1,-1,-1,-1,-1,-1,-1,-1,-1,-1,-1,-1,-1,-1,-1,-1,-1,-1,-1,-1,-1,-1,-1,-1,-1,-1,-1,-1,-1,-1,-1,-1,-1,-1,-1,-1,-1,-1,-1,-1,-1,-1,-1,-1,-1,-1,-1,-1,-1,-1,-1,-1,-1,-1,-1,-1,-1,-1,-1,-1,-1,-1,-1,-1,-1,-1,-1,-1,-1,-1,-1,-1,-1,-1,-1,-1,-1,-1,-1,-1,-1,-1,-1,-1,-1,-1,-1,-1,-1,-1,-1,-1,-1,-1,-1,-1,-1,-1,-1,-1,-1,-1,-1,-1,-1,-1,-1,-1,-1,-1,-1,-1,-1,-1,-1,0,0.846,0.538,0.692,0.769,0.462,0.077,0…	0.850774,0.280920,0.619912,0.360684,0.838524,0.736005,0.097780,0.884784,0.662102,0.978567,0.471035,0.089596,0.033288,0.997929,0.593824,0.120818,0.314837,0.692514,0.753010,0.869742,0.938776,0.967338,0.715916,0.921004,0.864510,0.814029,0.892073,0.888380,0.641415,0.087736,0.843590,0.023605,0.080162,0.026590,0.813354,0.079487,0.545384,0.533985,0.627663,0.015130,0.211620,0.096975,0.807979,0.107625,0.5…	101	123	145	367	na	na	0	na	na	0.164089	0.820444	245	267	66	767	0	1	0	-1	0.254986	-1	FALSE
all	PSMA2_A375_gRNA258	A375	PSMA2	ATATGCTTGGTAATTGGTTCTAC	GTAGAACCAATTACCAAGCATAT	ENST00000223321	AGGAGCCCCGTCCGTGGGAATTAAAGCTGCAAATGGTGTGGTATTAGCAACTGAGAAAAAACAGAAATCCATTCTGTATGATGAGCGAAGTGTACACAAAGTAGAACCAATTACCAAGCATATAGGTTTGGTGTACAGTGGCATGGGCCCCGATTACAGAGTGCTTGTGCACAGAGCTCGAAAACTAGCTCAACAATACTATCTTGTGTACCAAGAACCCATT	aacccctaccaactggtcggggtttgaaac	-14.3	((((((.(((....))).)))))).((..((..(((...)))..))..))...	-34.72	-1,-1,-1,-1,-1,-1,-1,-1,-1,-1,-1,-1,-1,-1,-1,-1,-1,-1,-1,-1,-1,-1,-1,-1,-1,-1,-1,-1,-1,-1,-1,-1,-1,-1,-1,-1,-1,-1,-1,-1,-1,-1,-1,-1,-1,-1,-1,-1,-1,-1,-1,-1,-1,-1,-1,-1,-1,-1,-1,-1,-1,-1,-1,-1,-1,-1,-1,-1,-1,-1,-1,-1,-1,-1,-1,-1,-1,-1,-1,-1,-1,-1,-1,-1,-1,-1,-1,-1,-1,-1,-1,-1,-1,-1,-1,-1,-1,-1,-1,-1,-1,-1,-1,-1,-1,-1,-1,0,0.846,0.538,0.692,0.769,0.462,0.077,0.077,0.231,0.308,0.077,0.231,0.308,0.30…	0.531403,0.453736,0.539871,0.126186,0.896488,0.629927,0.111467,0.912109,0.651299,0.962530,0.646863,0.171612,0.163478,0.994558,0.791689,0.102524,0.271635,0.711203,0.893911,0.532018,0.943039,0.950319,0.798869,0.936766,0.726997,0.757132,0.890887,0.901922,0.612952,0.160826,0.842784,0.136603,0.401877,0.070315,0.912209,0.372273,0.492802,0.568714,0.523009,0.042793,0.102451,0.257339,0.733238,0.113995,0.6…	101	123	158	380	na	na	0	na	na	0.172831	0.811701	258	280	66	767	0	1	0	-1	0.273504	-1	FALSE
all	PSMA2_A375_gRNA361	A375	PSMA2	AGGAATGGGTTCTTGGTACACAA	TTGTGTACCAAGAACCCATTCCT	ENST00000223321	GAACCAATTACCAAGCATATAGGTTTGGTGTACAGTGGCATGGGCCCCGATTACAGAGTGCTTGTGCACAGAGCTCGAAAACTAGCTCAACAATACTATCTTGTGTACCAAGAACCCATTCCTACAGCTCAGCTGGTACAGAGAGTAGCTTCTGTGATGCAAGAATATACTCAGTCAGGTGGTGTTCGTCCATTTGGAGTTTCTTTACTTATTTGTGGTTGGA	aacccctaccaactggtcggggtttgaaac	-17	((((((.(((....))).)))))).....((((((....))))))........	-38.51	-1,-1,-1,-1,0,0.846,0.538,0.692,0.769,0.462,0.077,0.077,0.231,0.308,0.077,0.231,0.308,0.308,0.769,0.769,0.231,0.462,0.077,0.231,0.154,0.077,0.385,0.077,0.154,0.308,0.385,0.462,0.462,0.615,-1,-1,-1,-1,-1,-1,-1,-1,-1,-1,-1,-1,-1,-1,-1,-1,-1,-1,-1,-1,-1,-1,1,0.339,0.339,0,0,0.424,0.34,0.51,0.425,0.68,0.17,0.427,0.512,0.512,0.171,0.085,0.086,0,0.171,0.171,0.086,1,1,0.855,0.94,0.427,1,0.256,0.085,0,0.…	0.175062,0.033760,0.070827,0.154298,0.832511,0.288513,0.081702,0.092295,0.006519,0.243426,0.384178,0.000536,0.007901,0.848340,0.152504,0.427784,0.693749,0.199416,0.093220,0.054848,0.877216,0.863786,0.367139,0.759923,0.138167,0.690773,0.113625,0.314274,0.804729,0.014328,0.328592,0.054173,0.281894,0.005697,0.219810,0.004505,0.001345,0.308957,0.051935,0.339090,0.000273,0.000258,0.023683,0.042922,0.4…	101	123	261	483	na	na	0	na	na	0.242098	0.742434	361	383	66	767	0	1	0	-1	0.420228	-1	FALSE
all	PSMA2_A375_gRNA392	A375	PSMA2	CAGAAGCTACTCTCTGTACCAGC	GCTGGTACAGAGAGTAGCTTCTG	ENST00000223321	ACAGTGGCATGGGCCCCGATTACAGAGTGCTTGTGCACAGAGCTCGAAAACTAGCTCAACAATACTATCTTGTGTACCAAGAACCCATTCCTACAGCTCAGCTGGTACAGAGAGTAGCTTCTGTGATGCAAGAATATACTCAGTCAGGTGGTGTTCGTCCATTTGGAGTTTCTTTACTTATTTGTGGTTGGAATGAGGGACGACCATATTTATTTCAGTCAGA	aacccctaccaactggtcggggtttgaaac	-15.4	((((((.(((....))).))))))......((((........)))).......	-37.92	0.462,0.462,0.615,-1,-1,-1,-1,-1,-1,-1,-1,-1,-1,-1,-1,-1,-1,-1,-1,-1,-1,-1,-1,-1,-1,1,0.339,0.339,0,0,0.424,0.34,0.51,0.425,0.68,0.17,0.427,0.512,0.512,0.171,0.085,0.086,0,0.171,0.171,0.086,1,1,0.855,0.94,0.427,1,0.256,0.085,0,0.256,0.684,0.684,0.427,0.684,1,1,0.427,0.855,0.256,0.769,0.256,0.598,0.427,0.085,0.256,0.684,0.427,0.94,0.342,0.342,0,0.171,0.513,0.256,0.684,0.94,0.342,0,0,0.513,0.598,0.…	0.144814,0.099358,0.222276,0.276360,0.892308,0.635067,0.078432,0.289689,0.524103,0.410491,0.497472,0.008324,0.018211,0.940859,0.167675,0.408682,0.852195,0.599530,0.100278,0.473140,0.876840,0.705999,0.681384,0.884428,0.678693,0.648301,0.241810,0.586404,0.831126,0.078987,0.772703,0.036644,0.459271,0.080812,0.887438,0.006429,0.052045,0.554083,0.204891,0.525714,0.000613,0.001445,0.089381,0.070603,0.5…	101	123	292	514	na	na	0	na	na	0.262946	0.721587	392	414	66	767	0	1	0	-1	0.464387	-1	FALSE
all	PSMA2_A375_gRNA696	A375	PSMA2	AATCCAGCTTCATTGCAGATTCC	GGAATCTGCAATGAAGCTGGATT	ENST00000223321	ATATAATGAAGATCTGGAACTTGAAGATGCCATTCATACAGCCATCTTAACCCTAAAGGAAAGCTTTGAAGGGCAAATGACAGAGGATAACATAGAAGTTGGAATCTGCAATGAAGCTGGATTTAGGAGGCTTACTCCAACTGAAGTTAAGGATTACTTGGCTGCCATAGCATAACAATGAAGTGACTGAAAAATCCAGAATTTCAGATAATCTATCTACTTA	aacccctaccaactggtcggggtttgaaac	-15.1	((((((.(((....))).))))))......((((..((......)).))))..	-33.74	-1,-1,-1,-1,-1,-1,-1,-1,-1,-1,-1,-1,-1,-1,-1,-1,-1,-1,-1,-1,-1,-1,-1,-1,-1,-1,-1,-1,-1,-1,-1,-1,-1,-1,-1,-1,-1,-1,-1,-1,-1,-1,-1,-1,-1,-1,-1,-1,-1,-1,-1,-1,-1,-1,-1,-1,-1,-1,0,0,0.079,0.079,0.079,0,0,0.158,0,0.158,0.315,0.157,0.079,0.079,0.079,0,0,0.157,0.078,0.157,0.549,0.156,0.313,0,0.156,0.235,0.156,0.312,0.312,0.468,0.312,0.234,0.389,0.779,0.701,0.779,0.932,0.622,0.777,0.544,0.233,0.077,0.31,…	0.768272,0.944161,0.417815,0.761733,0.483899,0.829425,0.443100,0.815983,0.714072,0.999593,0.357028,0.012436,0.555540,0.998603,0.975877,0.216947,0.062746,0.751849,0.725367,0.085031,0.805060,0.515825,0.332255,0.947856,0.956816,0.832275,0.659245,0.952652,0.901511,0.679189,0.036303,0.610709,0.593365,0.015673,0.070260,0.031032,0.185742,0.192723,0.002487,0.056102,0.000631,0.170909,0.270579,0.015927,0.7…	101	123	596	818	na	na	0	na	na	0.467384	0.517149	696	718	66	767	0	1	0	-1	0.897436	-1	FALSE
all	PSMA2_A375_gRNA708	A375	PSMA2	GTAAGCCTCCTAAATCCAGCTTC	GAAGCTGGATTTAGGAGGCTTAC	ENST00000223321	TCTGGAACTTGAAGATGCCATTCATACAGCCATCTTAACCCTAAAGGAAAGCTTTGAAGGGCAAATGACAGAGGATAACATAGAAGTTGGAATCTGCAATGAAGCTGGATTTAGGAGGCTTACTCCAACTGAAGTTAAGGATTACTTGGCTGCCATAGCATAACAATGAAGTGACTGAAAAATCCAGAATTTCAGATAATCTATCTACTTAAACATGTTTAAA	aacccctaccaactggtcggggtttgaaac	-13.5	((((((.(((....))).))))))........((((............)))).	-37.14	-1,-1,-1,-1,-1,-1,-1,-1,-1,-1,-1,-1,-1,-1,-1,-1,-1,-1,-1,-1,-1,-1,-1,-1,-1,-1,-1,-1,-1,-1,-1,-1,-1,-1,-1,-1,-1,-1,-1,-1,-1,-1,-1,-1,-1,-1,0,0,0.079,0.079,0.079,0,0,0.158,0,0.158,0.315,0.157,0.079,0.079,0.079,0,0,0.157,0.078,0.157,0.549,0.156,0.313,0,0.156,0.235,0.156,0.312,0.312,0.468,0.312,0.234,0.389,0.779,0.701,0.779,0.932,0.622,0.777,0.544,0.233,0.077,0.31,0.929,0.852,0.619,0.077,0.154,0.385,…	0.645964,0.890133,0.430534,0.653842,0.391948,0.716732,0.412008,0.877442,0.619255,0.998887,0.812080,0.000944,0.681397,0.999421,0.945582,0.402026,0.048072,0.708252,0.815558,0.191366,0.737827,0.515724,0.550714,0.968856,0.986500,0.789709,0.620357,0.984609,0.811099,0.523355,0.001778,0.562169,0.358733,0.005367,0.064926,0.016815,0.134460,0.416015,0.005250,0.035931,0.000654,0.195815,0.714906,0.004756,0.7…	101	123	608	830	na	na	0	na	na	0.475454	0.509079	708	730	66	767	0	1	0	-1	0.91453	-1	FALSE
all	POLA1_A375_gRNA746	A375	POLA1	TCGACCTGTACATCATCGCCAGC	GCTGGCGATGATGTACAGGTCGA	ENST00000379068	TGTGCACACCGCCACGGCAGTTCCTTCAGGAAAAATTGCTTCCCCTGTCTCCAGAAAGGAGCCTCCATTAACTCCTGTTCCTCTTAAACGTGCTGAATTTGCTGGCGATGATGTACAGGTCGAGAGTACAGAAGAAGAGCAGGAGTCAGGGGCAATGGAGTTTGAAGATGGTGACTTTGATGAGCCCATGGAAGTTGAAGAGGTGGACCTGGAGCCTATGGCT	aacccctaccaactggtcggggtttgaaac	-13.2	...........((.(((((((........))))))).))..............	-42.23	na	0.951796,0.003132,0.641937,0.972704,0.828472,0.133637,0.464735,0.127971,0.942286,0.939016,0.871739,0.076610,0.283387,0.954784,0.977234,0.991230,0.946898,0.571531,0.692019,0.884454,0.972091,0.280658,0.339293,0.897916,0.976553,0.800092,0.794210,0.884687,0.965169,0.879476,0.977891,0.121090,0.301716,0.291366,0.902895,0.807295,0.606640,0.248294,0.194876,0.255616,0.720003,0.231335,0.660354,0.952287,0.8…	101	123	646	868	na	na	0	na	na	0.1358	0.860007	746	768	44	4447	0	1	0	-1	0.159401	-1	FALSE
all	POLA1_A375_gRNA2175	A375	POLA1	AACAAGTTCAGACAGATGGTAGC	GCTACCATCTGTCTGAACTTGTT	ENST00000379068	AAGCTTGGGGGCCGGAGTGGATTTGGTGAAAGAAATGCTACCTGTGGTCGAATGATCTGTGATGTGGAAATTTCAGCAAAGGAATTGATTCGTTGTAAAAGCTACCATCTGTCTGAACTTGTTCAGCAGATTCTAAAAACTGAAAGGGTTGTAATCCCAATGGAAAATATACAAAATATGTACAGTGAATCTTCTCAACTGTTATACCTGTTGGAACACACCT	aacccctaccaactggtcggggtttgaaac	-15	.....((((((.(((.((.(((((((......))))))).))))).)))))).	-39.02	na	0.890418,0.017502,0.190103,0.883302,0.754024,0.179234,0.635775,0.814329,0.927714,0.978115,0.975865,0.009549,0.761550,0.998046,0.239901,0.628548,0.979397,0.523749,0.917988,0.964732,0.897485,0.584191,0.901134,0.905986,0.942261,0.985620,0.780266,0.948090,0.967214,0.459339,0.953639,0.399592,0.062926,0.037670,0.969573,0.600317,0.433212,0.256316,0.064486,0.664949,0.017463,0.041389,0.431584,0.070300,0.3…	101	123	2075	2297	na	na	0	na	na	0.396281	0.599526	2175	2197	44	4447	0	1	0	-1	0.483878	-1	FALSE
all	POLA1_A375_gRNA2466	A375	POLA1	GAAAATCTGCTTGTCAGGCACAA	TTGTGCCTGACAAGCAGATTTTC	ENST00000379068	ACTAACATCGCTGGGAACATTATGTCCAGGACGCTGATGGGTGGACGATCCGAGCGTAACGAGTTCTTGTTGCTTCATGCATTTTACGAAAACAACTATATTGTGCCTGACAAGCAGATTTTCAGAAAGCCTCAGCAAAAACTGGGAGATGAAGATGAAGAAATTGATGGAGATACCAATAAATACAAGAAAGGACGTAAGAAAGCAGCTTATGCTGGAGGCT	aacccctaccaactggtcggggtttgaaac	-15.3	((((((.(((....))).)))))).............(((((...)))))...	-34.13	na	0.482069,0.032695,0.137416,0.815739,0.909451,0.124161,0.229543,0.282720,0.812812,0.970888,0.754920,0.011620,0.110998,0.998666,0.670212,0.928376,0.987652,0.631143,0.703094,0.875669,0.406645,0.576541,0.837652,0.486621,0.994258,0.702083,0.361422,0.950127,0.917154,0.817381,0.909277,0.077916,0.115913,0.064107,0.838699,0.490646,0.789945,0.506665,0.013372,0.252793,0.012876,0.046746,0.252617,0.097277,0.3…	101	123	2366	2588	na	na	0	na	na	0.449326	0.546482	2466	2488	44	4447	0	1	0	-1	0.549955	-1	FALSE
all	POLA1_A375_gRNA3248	A375	POLA1	GTGACATAATTCCCATCCGACGT	ACGTCGGATGGGAATTATGTCAC	ENST00000379068	GAATAAGTTGTACAAACTGCTTGAAATAGACATTGATGGGGTTTTCAAGTCTCTGCTACTGCTGAAAAAAAAGAAGTACGCTGCTCTGGTTGTTGAGCCAACGTCGGATGGGAATTATGTCACCAAACAGGAGCTCAAAGGATTAGATATAGTTAGAAGAGATTGGTGTGATCTTGCTAAAGACACTGGAAACTTTGTGATTGGCCAGATTCTTTCTGATCAA	aacccctaccaactggtcggggtttgaaac	-13.8	((((((.(((....))).))))))....((((.................))))	-39.86	na	0.923757,0.007107,0.047267,0.924034,0.530483,0.175509,0.437346,0.805998,0.894934,0.995907,0.981020,0.013790,0.628745,0.995873,0.446074,0.963067,0.912331,0.958257,0.424484,0.969425,0.919659,0.302178,0.885859,0.846153,0.826226,0.978000,0.770386,0.979500,0.907352,0.621643,0.928881,0.540692,0.083794,0.254413,0.960334,0.361243,0.549937,0.231804,0.014207,0.128118,0.076083,0.139108,0.248571,0.363431,0.7…	101	123	3148	3370	na	na	0	na	na	0.59187	0.403937	3248	3270	44	4447	0	1	0	-1	0.72752	-1	FALSE
all	POLA1_A375_gRNA4232	A375	POLA1	ATGTACCGGTAAAAGCACAGCTG	CAGCTGTGCTTTTACCGGTACAT	ENST00000379068	TCGTCACCTTCCCCTTCAATTCTCCCGAACTGGGCCTCTTTGCCCAGCCTGCATGAAAGCTACACTTCAACCAGAGTATTCTGACAAGTCCCTGTACACCCAGCTGTGCTTTTACCGGTACATTTTTGATGCGGAGTGTGCACTGGAGAAACTTACTACCGATCATGAGAAAGATAAATTGAAGAAGCAATTTTTTACCCCCAAAGTTCTGCAGGACTACAGA	aacccctaccaactggtcggggtttgaaac	-13.5	((((((.(((....))).))))))...................(((...))).	-34.72	na	0.388202,0.226665,0.026163,0.218496,0.848211,0.062576,0.183649,0.171879,0.598301,0.594863,0.941008,0.061343,0.264904,0.881484,0.055435,0.969182,0.818199,0.522007,0.182754,0.804370,0.801213,0.241306,0.540698,0.787267,0.945348,0.402498,0.295123,0.671132,0.580587,0.488941,0.782831,0.074505,0.299381,0.172865,0.902124,0.806677,0.039171,0.049502,0.045856,0.317010,0.051515,0.331366,0.258978,0.444162,0.4…	101	123	4132	4354	na	na	0	na	na	0.771236	0.224572	4232	4254	44	4447	0	1	0	-1	0.950954	-1	FALSE
all	POLA1_A375_gRNA4267	A375	POLA1	TAGTAAGTTTCTCCAGTGCACAC	GTGTGCACTGGAGAAACTTACTA	ENST00000379068	CTCTTTGCCCAGCCTGCATGAAAGCTACACTTCAACCAGAGTATTCTGACAAGTCCCTGTACACCCAGCTGTGCTTTTACCGGTACATTTTTGATGCGGAGTGTGCACTGGAGAAACTTACTACCGATCATGAGAAAGATAAATTGAAGAAGCAATTTTTTACCCCCAAAGTTCTGCAGGACTACAGAAAACTCAAGAACACAGCAGAGCAATTCTTGTCCCG	aacccctaccaactggtcggggtttgaaac	-17.4	((((((.(((....))).)))))).((((((....))))))............	-39.32	na	0.820543,0.268351,0.048007,0.645512,0.910482,0.019679,0.329577,0.712395,0.871005,0.964239,0.954802,0.474848,0.687386,0.989287,0.097447,0.981485,0.917853,0.794862,0.494677,0.964675,0.843216,0.507509,0.786887,0.497795,0.988583,0.973395,0.349607,0.926420,0.975203,0.723227,0.958107,0.070829,0.412871,0.184515,0.703074,0.712352,0.086241,0.211146,0.146046,0.309204,0.101581,0.731798,0.357916,0.905046,0.4…	101	123	4167	4389	na	na	0	na	na	0.777616	0.218192	4267	4289	44	4447	0	1	0	-1	0.958901	-1	FALSE
all	PRPF8_A375_gRNA3114	A375	PRPF8	AGTCGGCTATGTTGTGGTCCACG	CGTGGACCACAACATAGCCGACT	ENST00000304992	AGACGAGTGAAGGCGAGTGCAATGTCATGCTGGAATCCCGCTTTGAGAAGATGTATGAGAAGATCGACTTGACTCTGCTCAACAGGCTGCTGCGCCTCATCGTGGACCACAACATAGCCGACTACATGACAGCCAAGAACAACGTCGTCATCAACTATAAGGACATGAACCATACGAATTCATATGGGATCATCAGAGGCCTGCAGTTTGCCTCATTCATCGT	aacccctaccaactggtcggggtttgaaac	-17.8	((((((.(((....))).)))))).......((.((((((...)))))).)).	-38.33	0.031,0.736,0.119,0.084,0.434,0.557,0.452,0.329,0.645,1,0.083,0,0,0.013,0.03,0.607,0.083,0.083,0.1,0.065,0.274,0.187,0.274,0.03,0.013,0.361,0.152,0.291,0.152,0.1,0.065,0.1,0.343,0.62,0.706,0.359,0.186,0.031,0.117,0.082,0.238,0.255,0.186,0.169,0.341,0.307,0.324,0.617,0.548,0.392,0.323,0.427,0.513,0.668,1,0.495,0.838,0.46,0.735,1,0.684,1,0.633,0.409,0.289,1,1,0.753,0.598,1,1,1,0.65,0.186,0.407,0.45…	0.015120,0.325299,0.347976,0.000284,0.934247,0.008020,0.071873,0.057340,0.560980,0.997055,0.256967,0.059147,0.574317,0.955672,0.991113,0.677024,0.378968,0.470382,0.005038,0.066680,0.332079,0.600402,0.015022,0.616665,0.253869,0.579578,0.061984,0.022765,0.109968,0.585858,0.974514,0.022434,0.683735,0.014806,0.407039,0.032078,0.075295,0.093614,0.001418,0.001444,0.018706,0.224768,0.246338,0.065483,0.9…	101	123	3014	3236	na	na	0	na	na	0.426731	0.570117	3114	3136	115	7119	0	1	0	-1	0.428123	-1	FALSE
all	PRPF8_A375_gRNA4517	A375	PRPF8	GATCATGTCTGTACGGTAGTTGT	ACAACTACCGTACAGACATGATC	ENST00000304992	GGCTGGCGTGTCAGAACTGACTTTAAGCAGTATCAGGTTTTGAAGCAGAATCCGTTCTGGTGGACACACCAGCGGCATGATGGGAAGCTCTGGAACCTGAACAACTACCGTACAGACATGATCCAGGCCCTGGGCGGTGTGGAAGGCATTCTGGAACACACACTCTTTAAGGGCACTTACTTCCCTACCTGGGAGGGGCTTTTCTGGGAGAAGGCCAGTGGCT	aacccctaccaactggtcggggtttgaaac	-14	((((((.(((....))).))))))....(((((..(((....)))...)))))	-38.82	0.017,0.017,0,0.034,0.034,0,0.034,0,0.067,0.017,0.067,0.218,0.1,0.283,0.483,0.283,0.083,0.182,0.265,0.182,0.199,0.298,0.411,0.855,1,0.95,0.214,0.312,0.706,0.296,1,1,-1,-1,-1,-1,-1,-1,-1,-1,-1,-1,-1,-1,-1,-1,-1,-1,-1,-1,-1,-1,-1,-1,-1,-1,-1,-1,-1,-1,-1,-1,-1,-1,0.925,1,0.271,0.068,0,0.135,0.023,0.023,0,0.271,0.158,0.339,0.226,0.293,0.451,0.519,0.181,0.181,0.339,0.519,0.519,0.406,0.09,0.045,0.023,0…	0.310079,0.245018,0.694040,0.282282,0.861768,0.115607,0.073960,0.039337,0.917368,0.981361,0.137590,0.472515,0.994121,0.203395,0.758126,0.930780,0.312083,0.030668,0.102923,0.017507,0.610451,0.264226,0.055374,0.711528,0.560412,0.190640,0.361400,0.001482,0.581424,0.190581,0.859258,0.059196,0.507998,0.079711,0.688174,0.306340,0.011440,0.327966,0.260152,0.055884,0.190236,0.252367,0.030478,0.021986,0.3…	101	123	4417	4639	na	na	0	na	na	0.619054	0.377793	4517	4539	115	7119	0	1	0	-1	0.628408	-1	FALSE
all	PRPF8_A375_gRNA5243	A375	PRPF8	GTTTCCATAGGCACTGTGCAAGT	ACTTGCACAGTGCCTATGGAAAC	ENST00000304992	GAGCGCTACGCCCGGGCCAAGTTCCTGGACTACACCACCGACAACATGAGTATCTACCCTTCGCCCACAGGTGTACTCATCGCCATTGACCTGGCCTATAACTTGCACAGTGCCTATGGAAACTGGTTCCCAGGCAGCAAGCCTCTCATACAACAGGCCATGGCCAAGATCATGAAGGCAAACCCTGCCCTGTATGTGTTACGTGAACGGATCCGCAAGGGGC	aacccctaccaactggtcggggtttgaaac	-14.7	((((((.(((....))).))))))...........(((((...))))).....	-38.1	1,1,0.28,0.445,0.346,0.346,1,0.528,0.412,0.214,0.297,0.033,0.049,0.016,0.066,0.115,0.099,0.28,0.998,0.511,0.148,0.363,0.264,0.066,0.033,0,0.049,0.576,0.164,0.345,0.871,0.641,0.427,0.803,0.18,0.541,0.394,0.197,0.245,0.687,0.474,0.818,1,0.899,0.621,0.36,0.131,0.147,0.278,0.245,0.278,0.491,0.327,0.981,0.817,0.311,0.262,0.065,0.082,0.196,0.213,0.049,0.245,0.163,0.065,0.098,0.147,0.098,0.163,0.082,0.0…	0.148003,0.770389,0.601349,0.054941,0.055234,0.575346,0.014969,0.047500,0.907695,0.994762,0.951027,0.051378,0.015676,0.095005,0.803697,0.127597,0.237589,0.115814,0.369562,0.015696,0.907365,0.461401,0.273932,0.499775,0.081078,0.124925,0.101660,0.161634,0.499735,0.719200,0.087228,0.116319,0.974974,0.055865,0.662732,0.007682,0.018165,0.539590,0.048392,0.621492,0.013790,0.022687,0.011978,0.217993,0.1…	101	123	5143	5365	na	na	0	na	na	0.718574	0.278273	5243	5265	115	7119	0	1	0	-1	0.732049	-1	FALSE
all	PRPF8_A375_gRNA5343	A375	PRPF8	GCCCCTTGCGGATCCGTTCACGT	ACGTGAACGGATCCGCAAGGGGC	ENST00000304992	ACTTGCACAGTGCCTATGGAAACTGGTTCCCAGGCAGCAAGCCTCTCATACAACAGGCCATGGCCAAGATCATGAAGGCAAACCCTGCCCTGTATGTGTTACGTGAACGGATCCGCAAGGGGCTACAGCTCTATTCATCTGAACCCACTGAGCCTTATTTGTCTTCTCAGAACTATGGTGAGCTCTTCTCCAACCAGATTATCTGGTTTGTGGATGACACCAA	aacccctaccaactggtcggggtttgaaac	-16.8	((((((.(((....))).)))))).((..(((.....)))..)).........	-43.6	0.277,0.147,0.082,0.13,0,0,0.049,0.033,0.163,0,0.441,0.046,0.067,0.067,0.437,0.898,0.252,0.112,0.295,0.227,0.364,0.593,0.27,0.247,0.703,0.771,0.452,0.154,0.041,0.019,0.177,0.019,0.018,0,0.063,0.671,0.04,0.196,0.196,0.174,0.174,0.174,0.195,0.106,0.173,0.15,0.485,0.705,0.482,0.26,0.371,0.438,0,0.171,0.06,0.082,0.016,0,0.016,0.104,0.258,0.082,0.016,0.016,0.301,0.411,0.367,0.606,0.923,0.388,0.562,0.7…	0.603053,0.962855,0.327060,0.073032,0.925205,0.486373,0.412240,0.181344,0.973703,0.984639,0.987445,0.760658,0.381611,0.710425,0.406882,0.207715,0.113397,0.077192,0.274808,0.193731,0.933137,0.646277,0.842790,0.952528,0.981443,0.798066,0.880430,0.565287,0.877876,0.425721,0.841744,0.722137,0.764830,0.355164,0.994856,0.196389,0.721577,0.980398,0.078296,0.107938,0.533593,0.069043,0.361911,0.592443,0.3…	101	123	5243	5465	na	na	0	na	na	0.732282	0.264565	5343	5365	115	7119	0	1	0	-1	0.746324	-1	FALSE
all	PRPF8_A375_gRNA5348	A375	PRPF8	CTGTAGCCCCTTGCGGATCCGTT	AACGGATCCGCAAGGGGCTACAG	ENST00000304992	CACAGTGCCTATGGAAACTGGTTCCCAGGCAGCAAGCCTCTCATACAACAGGCCATGGCCAAGATCATGAAGGCAAACCCTGCCCTGTATGTGTTACGTGAACGGATCCGCAAGGGGCTACAGCTCTATTCATCTGAACCCACTGAGCCTTATTTGTCTTCTCAGAACTATGGTGAGCTCTTCTCCAACCAGATTATCTGGTTTGTGGATGACACCAACGTCT	aacccctaccaactggtcggggtttgaaac	-16.5	((((((.(((....))).))))))......((((((....)))))).......	-40.14	0,0.049,0.033,0.163,0,0.441,0.046,0.067,0.067,0.437,0.898,0.252,0.112,0.295,0.227,0.364,0.593,0.27,0.247,0.703,0.771,0.452,0.154,0.041,0.019,0.177,0.019,0.018,0,0.063,0.671,0.04,0.196,0.196,0.174,0.174,0.174,0.195,0.106,0.173,0.15,0.485,0.705,0.482,0.26,0.371,0.438,0,0.171,0.06,0.082,0.016,0,0.016,0.104,0.258,0.082,0.016,0.016,0.301,0.411,0.367,0.606,0.923,0.388,0.562,0.759,0.669,0.887,1,0.582,0.…	0.438458,0.930997,0.090773,0.035120,0.975164,0.541989,0.119610,0.249507,0.961170,0.961529,0.976583,0.700795,0.360830,0.805943,0.488898,0.215057,0.108122,0.092800,0.128671,0.102101,0.915296,0.641791,0.879271,0.957723,0.917358,0.823903,0.927734,0.493421,0.818815,0.251558,0.887458,0.084561,0.507592,0.392974,0.995104,0.115891,0.352108,0.985538,0.032155,0.167124,0.314159,0.059638,0.071270,0.297313,0.2…	101	123	5248	5470	na	na	0	na	na	0.732968	0.263879	5348	5370	115	7119	0	1	0	-1	0.747038	-1	FALSE
all	PRPF8_A375_gRNA6168	A375	PRPF8	TCTGCTGCCGCTGCTGTGACGGT	ACCGTCACAGCAGCGGCAGCAGA	ENST00000304992	ATCTGATCTTGGCTGACTACGGCAAGAAAAACAATGTGAACGTGGCATCACTGACACAATCAGAAATTCGAGACATCATCCTGGGTATGGAGATCTCGGCACCGTCACAGCAGCGGCAGCAGATCGCTGAGATCGAGAAGCAGACCAAGGAACAATCGCAGCTGACGGCAACACAGACTCGCACTGTCAACAAGCATGGCGATGAGATCATCACCTCCACCAC	aacccctaccaactggtcggggtttgaaac	-18.4	((((((.(((....))).)))))).........((((.(((....))).))))	-40.68	0.449,0.265,0.224,0.183,0.594,0.834,0.266,0.142,0.101,0.101,0.163,0.122,0.06,0.06,0.516,0.205,0.414,0.289,0.185,0.123,0.185,0.06,0.312,0.374,0.353,0.374,0.166,0.524,0.852,0.93,0.44,0.336,0.357,0,0.435,0.132,0.092,0.208,0.591,0.148,0.108,0.128,0.104,0.144,0.104,0.383,0.363,0.298,0.12,0.031,0.1,0.139,0.784,0.568,0.136,0.155,0.214,0.541,0.463,0.327,0.463,0.346,0.437,0.63,0.669,0.707,0.669,0.527,0.45…	0.850172,0.591533,0.885125,0.155620,0.125363,0.108515,0.273221,0.039855,0.194021,0.979133,0.308952,0.201356,0.991167,0.975478,0.995486,0.389432,0.010793,0.141796,0.477677,0.011475,0.416720,0.166265,0.053261,0.346600,0.931174,0.902767,0.189643,0.000385,0.236764,0.768324,0.986118,0.082976,0.152491,0.001118,0.704269,0.011492,0.065055,0.005884,0.002919,0.217120,0.015218,0.522702,0.709021,0.322104,0.7…	101	123	6068	6290	na	na	0	na	na	0.845374	0.151474	6168	6190	115	7119	0	1	0	-1	0.864097	-1	FALSE
all	DDX27_A375_gRNA677	A375	DDX27	TAGACCCACAGGTATGCACGCCT	AGGCGTGCATACCTGTGGGTCTA	ENST00000618172	CAGTACGATGAAAACCTCTCGTTCCAGGACATGAACCTTTCCCGCCCTCTTCTGAAGGCCATTACAGCCATGGGCTTCAAGCAGCCCACCCCGATCCAGAAGGCGTGCATACCTGTGGGTCTATTGGGGAAGGACATCTGTGCCTGTGCAGCCACTGGGACAGGTAAAACTGCCGCCTTTGCCCTGCCTGTTTTGGAGCGTCTGATTTATAAACCCCGCCAGG	aacccctaccaactggtcggggtttgaaac	-15.4	((((((.(((....))).))))))...............((((......))))	-37.05	-1,-1,-1,-1,-1,-1,-1,-1,-1,-1,-1,-1,-1,-1,-1,-1,-1,-1,-1,-1,-1,-1,-1,-1,-1,-1,-1,-1,-1,-1,-1,-1,-1,-1,-1,-1,-1,-1,-1,-1,-1,-1,-1,-1,-1,-1,-1,-1,-1,-1,-1,-1,-1,-1,-1,-1,-1,-1,-1,-1,-1,-1,-1,-1,-1,-1,-1,-1,-1,-1,0.167,0.167,0.333,0,0,0.333,0.167,0.667,1,1,0.167,1,0,0,0,0,0,0.5,0,0.167,0,0,0.667,0.833,1,0.167,0.5,0.5,0.167,1,0,0,0,0.167,0.333,1,0.333,0.5,0.833,0.5,0.167,0.167,0,0.833,0.5,0.167,0,1,0…	0.008638,0.095497,0.024255,0.030262,0.058462,0.075727,0.016185,0.027342,0.000987,0.037767,0.036283,0.010442,0.078848,0.889169,0.133581,0.142610,0.005253,0.002707,0.072500,0.009667,0.463325,0.258141,0.226090,0.294838,0.000061,0.004010,0.222693,0.012912,0.090859,0.061883,0.015898,0.001248,0.227418,0.068165,0.000992,0.011204,0.000690,0.014038,0.003384,0.039816,0.049298,0.083892,0.080945,0.016326,0.2…	101	123	577	799	na	na	0	na	na	0.263342	0.727698	677	699	34	2328	0	1	0	-1	0.280174	-1	FALSE
all	DDX27_A375_gRNA770	A375	DDX27	GGGTTTATAAATCAGACGCTCCA	TGGAGCGTCTGATTTATAAACCC	ENST00000618172	ATCCAGAAGGCGTGCATACCTGTGGGTCTATTGGGGAAGGACATCTGTGCCTGTGCAGCCACTGGGACAGGTAAAACTGCCGCCTTTGCCCTGCCTGTTTTGGAGCGTCTGATTTATAAACCCCGCCAGGCTCCAGTCACCCGCGTGCTGGTGCTAGTGCCCACCCGAGAGCTGGGCATCCAGGTGCACTCTGTCACCAGACAGCTGGCCCAGTTCTGCAACA	aacccctaccaactggtcggggtttgaaac	-14.8	((((((.(((....))).))))))......(.((((.......)))).)....	-36.9	0.833,1,0.167,0.5,0.5,0.167,1,0,0,0,0.167,0.333,1,0.333,0.5,0.833,0.5,0.167,0.167,0,0.833,0.5,0.167,0,1,0.667,0.167,0.5,1,1,1,1,0.167,0,0.167,0.333,0.5,0,0.667,0.167,1,1,0.667,0.333,0.5,0.5,0.5,0.333,0.5,0,0,0.167,0.5,1,0,0.667,0.833,1,0.5,0,0.333,0.5,0,0.833,0.167,1,0,0,0,0,0.111,0,0.444,0.444,0.889,0.111,0.111,0.333,0.111,0,0.111,0.556,0,0.111,0.556,0.222,0.667,0.556,0,0.111,0.333,0.444,0.111,0…	0.004926,0.019687,0.052706,0.000083,0.098898,0.824333,0.012722,0.023010,0.001855,0.152364,0.209366,0.082078,0.033777,0.237866,0.007589,0.003411,0.001524,0.012097,0.569763,0.034664,0.827722,0.372695,0.158953,0.500434,0.023671,0.081149,0.158807,0.038431,0.024529,0.010902,0.789340,0.045567,0.721187,0.123341,0.000116,0.089530,0.000572,0.001946,0.085095,0.031009,0.169678,0.014663,0.008577,0.208739,0.1…	101	123	670	892	na	na	0	na	na	0.299571	0.691469	770	792	34	2328	0	1	0	-1	0.320697	-1	FALSE
all	DDX27_A375_gRNA1291	A375	DDX27	AACAAAGCTGCCACGATGGCTTC	GAAGCCATCGTGGCAGCTTTGTT	ENST00000618172	GAAGAATCCTGTCCGGATATTTGTGAACAGCAACACAGATGTGGCTCCCTTCCTGCGGCAGGAGTTCATCCGGATCCGGCCTAATCGTGAAGGAGACCGGGAAGCCATCGTGGCAGCTTTGTTGACGAGGACCTTCACTGACCATGTGATGCTGTTCACGCAAACCAAGAAGCAGGCCCACCGCATGCACATCCTCCTGGGGCTCATGGGGCTGCAGGTGGGT	aacccctaccaactggtcggggtttgaaac	-16.9	((((((.(((....))).))))))...............((((...))))...	-33.67	0.25,0.75,0.25,0.625,1,0.75,0.375,0.125,0,0,0.25,0,0,0,0,0.25,0.25,0.5,1,0.875,0.25,0.875,0.375,0,0.5,1,0.25,1,0.375,0.25,0.5,0.5,1,0.625,0.125,0.625,0.75,0.75,0.875,0.375,0.25,0.375,0.25,0.25,0,0.375,0,0.125,0.75,0.75,0,-1,-1,-1,-1,-1,-1,-1,-1,-1,-1,-1,-1,-1,-1,-1,-1,-1,-1,-1,-1,-1,-1,-1,-1,-1,-1,-1,-1,-1,-1,-1,-1,-1,-1,-1,-1,-1,-1,-1,-1,-1,-1,-1,-1,-1,-1,-1,-1,-1,-1,-1,-1,-1,-1,-1,-1,-1,-1,-1,-…	0.633004,0.403612,0.092492,0.701675,0.186421,0.027370,0.076197,0.292555,0.050185,0.979893,0.034759,0.012607,0.074026,0.941934,0.981368,0.065778,0.018945,0.017836,0.555206,0.153951,0.521447,0.694436,0.266675,0.644074,0.046822,0.517224,0.121534,0.063422,0.715154,0.070651,0.115946,0.027326,0.261536,0.054924,0.041837,0.032432,0.024954,0.137606,0.210541,0.013409,0.072584,0.190769,0.257172,0.682618,0.4…	101	123	1191	1413	na	na	0	na	na	0.502532	0.488508	1291	1313	34	2328	0	1	0	-1	0.547712	-1	FALSE
all	DDX27_A375_gRNA1428	A375	DDX27	CCAGCCGCTGCGTCTGTGACAAG	CTTGTCACAGACGCAGCGGCTGG	ENST00000618172	CTGACCATGTGATGCTGTTCACGCAAACCAAGAAGCAGGCCCACCGCATGCACATCCTCCTGGGGCTCATGGGGCTGCAGGTGGGTGAGCTCCATGGCAACTTGTCACAGACGCAGCGGCTGGAGGCCCTCCGGCGTTTTAAGGATGAACAGATTGACATCCTCGTGGCCACTGATGTGGCAGCCCGTGGACTTGACATTGAGGGGGTCAAAACGGTAATCAA	aacccctaccaactggtcggggtttgaaac	-14.5	((((((.(((....))).)))))).......(((.((...)).))).......	-43.01	0.158,0.792,1,1,0,0.648,1,0.486,0.324,0.486,0.165,0.33,0.495,0.33,0.33,0,0,0.837,0.335,0.502,0.17,0.339,0.509,0.509,1,0.857,0.514,0,0.514,0.514,0.866,0.173,1,0.866,0.173,0.692,0.346,0.519,0.173,0,0.692,0,0.173,0,0.346,0,0.173,0.692,0.173,1,0.692,0.346,0.519,0.692,0.519,0,0.173,0,0,0,0.519,0.173,0.346,0,0.519,0,0.173,0.519,0.866,1,0.519,0.346,0.692,0.173,0,0,1,0.346,0.346,0,0,0.173,0,0,0.346,0,0.5…	0.588354,0.310848,0.106172,0.580963,0.090079,0.279411,0.331418,0.499243,0.148968,0.697195,0.401020,0.065552,0.464752,0.894994,0.906446,0.617976,0.007834,0.277613,0.444469,0.133114,0.865148,0.809035,0.293571,0.901685,0.025243,0.132026,0.448507,0.065336,0.503647,0.441852,0.054010,0.005112,0.033375,0.571983,0.266067,0.150613,0.005421,0.044815,0.081116,0.021159,0.031386,0.170783,0.109183,0.020723,0.6…	101	123	1328	1550	na	na	0	na	na	0.555902	0.435138	1428	1450	34	2328	0	1	0	-1	0.607407	-1	FALSE
all	DDX27_A375_gRNA1483	A375	DDX27	ACATCAGTGGCCACGAGGATGTC	GACATCCTCGTGGCCACTGATGT	ENST00000618172	CCTCCTGGGGCTCATGGGGCTGCAGGTGGGTGAGCTCCATGGCAACTTGTCACAGACGCAGCGGCTGGAGGCCCTCCGGCGTTTTAAGGATGAACAGATTGACATCCTCGTGGCCACTGATGTGGCAGCCCGTGGACTTGACATTGAGGGGGTCAAAACGGTAATCAACTTCACAATGCCTAATACCATCAAACATTATGTCCACCGGGTGGGGCGAACAGCA	aacccctaccaactggtcggggtttgaaac	-18.1	((((((.(((....))).))))))......(((((..((....))..))))).	-38.52	0,0.173,0,0,0,0.519,0.173,0.346,0,0.519,0,0.173,0.519,0.866,1,0.519,0.346,0.692,0.173,0,0,1,0.346,0.346,0,0,0.173,0,0,0.346,0,0.519,0.519,0,1,0.173,0,0,0.346,0.692,0.346,0,0.173,0.866,0.866,0.519,0.692,0.519,0.866,0.173,0.866,0.346,0.692,0,0.346,0.519,0.519,0.346,0.346,0.173,-1,-1,-1,-1,-1,-1,-1,-1,-1,-1,-1,-1,-1,-1,-1,-1,-1,-1,-1,-1,-1,-1,-1,-1,-1,-1,-1,-1,-1,-1,-1,-1,-1,-1,-1,-1,-1,-1,-1,-1,-1,…	0.910019,0.466710,0.630597,0.207974,0.293866,0.550097,0.610758,0.807768,0.932188,0.577179,0.045201,0.935193,0.045413,0.874607,0.403477,0.000093,0.018912,0.516643,0.694687,0.800306,0.896179,0.964737,0.499469,0.933673,0.668590,0.317273,0.113975,0.777443,0.815832,0.296714,0.150753,0.213070,0.633493,0.463933,0.766190,0.655073,0.294447,0.433571,0.885339,0.000080,0.744290,0.060492,0.482475,0.417472,0.7…	101	123	1383	1605	na	na	0	na	na	0.577328	0.413713	1483	1505	34	2328	0	1	0	-1	0.631373	-1	FALSE
all	DDX27_A375_gRNA2076	A375	DDX27	TGCGATTCCTCTTCGCTAGCCGT	ACGGCTAGCGAAGAGGAATCGCA	ENST00000618172	AGAAAAGGAAGAAGTTTATGAAGGATGCCAAAAAAAAGGGGGAGATGACAGCAGAGGAAAGGTCTCAGTTTGAAATCCTCAAGGCGCAGATGTTTGCTGAACGGCTAGCGAAGAGGAATCGCAGAGCCAAGCGGGCCCGAGCAATGCCCGAGGAGGAGCCAGTGAGAGGTCCTGCCAAGAAGCAAAAGCAGGGGAAGAAATCTGTATTTGATGAAGAACTCAC	aacccctaccaactggtcggggtttgaaac	-17.7	((((((.(((....))).)))))).....((((((.......)))).))....	-36.72	0.33,0.33,0.66,0.99,1,0.33,0.22,0.661,0.881,0.551,1,1,0.661,0,0.11,0.662,0.441,0.882,0.772,0.331,0.993,0.221,0.11,0.772,0.552,0.441,0.331,0,0,0.11,0.11,0.331,0.773,1,0.773,0.994,0.331,0.331,0.11,0,0.437,0.109,0,0.437,0.867,0.217,0.65,0.325,0.434,0.108,0.389,0.195,0.195,0.292,0.097,0.097,0,0.679,0.873,0,0.097,0.772,0.193,0.193,0.287,0.287,0.383,0.383,0.096,0.666,0.19,0.381,0.856,0.666,0.663,0.284,…	0.345766,0.565541,0.389165,0.720862,0.027380,0.515711,0.111006,0.109273,0.004434,0.524050,0.372881,0.025935,0.671272,0.974229,0.605740,0.067578,0.014744,0.082752,0.165613,0.153357,0.725984,0.500869,0.011585,0.781592,0.607466,0.555049,0.398291,0.004645,0.162756,0.018264,0.968757,0.000491,0.046508,0.116767,0.094911,0.017959,0.039899,0.001680,0.020028,0.189338,0.000008,0.114511,0.103387,0.003907,0.4…	101	123	1976	2198	na	na	0	na	na	0.808337	0.182704	2076	2098	34	2328	0	1	0	-1	0.88976	-1	FALSE
all	GTPBP4_A375_gRNA1021	A375	GTPBP4	ATCCACGTCTGCTCTCGTCACCT	AGGTGACGAGAGCAGACGTGGAT	ENST00000360803	GTGCGTCAGCATTTATCCCGTTTGCCAACCATTGATCCGAATACCAGGACCCTGCTTTTGTGTGGGTACCCAAATGTTGGGAAGTCCAGCTTCATCAACAAGGTGACGAGAGCAGACGTGGATGTCCAGCCCTATGCGTTCACAACCAAGTCTCTGTTTGTTGGGCACATGGATTATAAGTATCTACGTTGGCAGGTTGTAGACACTCCTGGGATCCTGGACC	aacccctaccaactggtcggggtttgaaac	-13.6	((((((.(((....))).))))))..........(((........))).....	-43.59	na	0.625008,0.055442,0.031649,0.319224,0.423136,0.371931,0.646730,0.208908,0.985478,0.989739,0.508574,0.001756,0.602353,0.919065,0.667860,0.954239,0.926721,0.586608,0.593176,0.648997,0.852159,0.325132,0.550504,0.677942,0.967583,0.497133,0.091404,0.651884,0.981577,0.968824,0.974612,0.261316,0.171906,0.168941,0.819417,0.777830,0.050065,0.257714,0.059674,0.063134,0.027490,0.106540,0.235036,0.019713,0.4…	101	123	921	1143	na	na	0	na	na	0.200985	0.794483	1021	1043	462	2363	0	1	0	-1	0.293901	-1	FALSE
all	GTPBP4_A375_gRNA1024	A375	GTPBP4	GACATCCACGTCTGCTCTCGTCA	TGACGAGAGCAGACGTGGATGTC	ENST00000360803	CGTCAGCATTTATCCCGTTTGCCAACCATTGATCCGAATACCAGGACCCTGCTTTTGTGTGGGTACCCAAATGTTGGGAAGTCCAGCTTCATCAACAAGGTGACGAGAGCAGACGTGGATGTCCAGCCCTATGCGTTCACAACCAAGTCTCTGTTTGTTGGGCACATGGATTATAAGTATCTACGTTGGCAGGTTGTAGACACTCCTGGGATCCTGGACCACC	aacccctaccaactggtcggggtttgaaac	-14.9	((((((.(((....))).))))))......(((......)))...........	-41.14	na	0.493874,0.034441,0.029608,0.349792,0.491579,0.402208,0.432426,0.176706,0.974751,0.989849,0.382275,0.002780,0.475539,0.921125,0.537820,0.953642,0.960048,0.733735,0.609589,0.470323,0.851195,0.331736,0.623184,0.676728,0.951167,0.343199,0.065190,0.546353,0.982648,0.938882,0.981610,0.203312,0.177579,0.119957,0.680118,0.735175,0.073439,0.139717,0.051658,0.075084,0.044051,0.031482,0.293064,0.014600,0.5…	101	123	924	1146	na	na	0	na	na	0.201576	0.793892	1024	1046	462	2363	0	1	0	-1	0.295478	-1	FALSE
all	GTPBP4_A375_gRNA1055	A375	GTPBP4	ACAGAGACTTGGTTGTGAACGCA	TGCGTTCACAACCAAGTCTCTGT	ENST00000360803	ATCCGAATACCAGGACCCTGCTTTTGTGTGGGTACCCAAATGTTGGGAAGTCCAGCTTCATCAACAAGGTGACGAGAGCAGACGTGGATGTCCAGCCCTATGCGTTCACAACCAAGTCTCTGTTTGTTGGGCACATGGATTATAAGTATCTACGTTGGCAGGTTGTAGACACTCCTGGGATCCTGGACCACCCTCTGGAGGATAGGAACACCATCGAGATGCA	aacccctaccaactggtcggggtttgaaac	-15.7	((((((.(((....))).)))))).....(((((........)))))......	-40.18	na	0.566186,0.052501,0.007390,0.553791,0.565138,0.477196,0.331937,0.418420,0.950840,0.895131,0.620223,0.008165,0.098829,0.984338,0.307744,0.893020,0.974416,0.411208,0.555421,0.707187,0.902683,0.285162,0.740621,0.864224,0.973422,0.253041,0.146717,0.714221,0.993760,0.891945,0.961900,0.531214,0.346550,0.273644,0.913442,0.822559,0.060017,0.093620,0.077504,0.646330,0.165979,0.086233,0.155944,0.050781,0.6…	101	123	955	1177	na	na	0	na	na	0.207685	0.787783	1055	1077	462	2363	0	1	0	-1	0.311777	-1	FALSE
all	GTPBP4_A375_gRNA1056	A375	GTPBP4	AACAGAGACTTGGTTGTGAACGC	GCGTTCACAACCAAGTCTCTGTT	ENST00000360803	TCCGAATACCAGGACCCTGCTTTTGTGTGGGTACCCAAATGTTGGGAAGTCCAGCTTCATCAACAAGGTGACGAGAGCAGACGTGGATGTCCAGCCCTATGCGTTCACAACCAAGTCTCTGTTTGTTGGGCACATGGATTATAAGTATCTACGTTGGCAGGTTGTAGACACTCCTGGGATCCTGGACCACCCTCTGGAGGATAGGAACACCATCGAGATGCAG	aacccctaccaactggtcggggtttgaaac	-15.8	((((((.(((....))).))))))....(((((.........)))))......	-39.57	na	0.665455,0.044802,0.006354,0.576248,0.552880,0.505857,0.267255,0.500200,0.969892,0.861924,0.565880,0.009301,0.077053,0.982678,0.305371,0.899438,0.967267,0.355761,0.605941,0.689105,0.901683,0.300740,0.838666,0.832227,0.979214,0.285701,0.194388,0.741092,0.989576,0.873821,0.951808,0.457985,0.387184,0.273812,0.973639,0.828723,0.067061,0.108284,0.076228,0.619046,0.243864,0.073339,0.200571,0.044772,0.7…	101	123	956	1178	na	na	0	na	na	0.207882	0.787586	1056	1078	462	2363	0	1	0	-1	0.312303	-1	FALSE
all	GTPBP4_A375_gRNA1400	A375	GTPBP4	TGGTCTCTATTACAGGGAATCCT	AGGATTCCCTGTAATAGAGACCA	ENST00000360803	TCAACAAGCCTCTCATAGTTGTAGCCAACAAATGTGATGTGAAGAGAATAGCTGAACTTTCTGAAGATGATCAGAAAATATTTACAGATTTGCAGTCTGAAGGATTCCCTGTAATAGAGACCAGCACCCTGACTGAGGAAGGTGTTATTAAAGTTAAAACAGAGGCTTGCGATAGGCTTTTGGCTCATCGAGTGGAAACCAAAATGAAGGGAAATAAAGTGAA	aacccctaccaactggtcggggtttgaaac	-16.7	((((((.(((....))).)))))).......(((((((.....)))))..)).	-34.97	na	0.790185,0.102782,0.030566,0.722671,0.451857,0.239485,0.369887,0.747820,0.958828,0.878242,0.937945,0.068497,0.520761,0.951883,0.051626,0.888511,0.969478,0.892643,0.452615,0.958367,0.769489,0.614473,0.784107,0.736549,0.983797,0.928895,0.050617,0.982993,0.956026,0.502776,0.942329,0.154071,0.081525,0.068289,0.892329,0.555599,0.513558,0.107662,0.040651,0.520518,0.025134,0.004792,0.222606,0.434913,0.7…	101	123	1300	1522	na	na	0	na	na	0.275665	0.719803	1400	1422	462	2363	0	1	0	-1	0.493165	-1	FALSE
all	GTPBP4_A375_gRNA2355	A375	GTPBP4	CCAAACGGATACTATCTCCTGTC	GACAGGAGATAGTATCCGTTTGG	ENST00000360803	GAAGATGAATCGGTTGGGGAAGAAAGGGGAGGCGGATAGACACGTGTTTGATATGAAGCCCAAGCACTTGCTGTCTGGGAAGAGGAAAGCTGGTAAAAAGGACAGGAGATAGTATCCGTTTGGTTGGCGTGGCTTCGCTAGAGTGTTGCTGTTTATTTCCTGGTTTGGCACAGTATGGTTTCATGAAATTGGAGCTCTGTATAAACTGAAAAAGACAAAATAA	aacccctaccaactggtcggggtttgaaac	-14.2	((((((.(((....))).))))))............(((.......)))....	-36.31	na	0.840407,0.424871,0.028220,0.659262,0.605715,0.757304,0.748395,0.513830,0.958144,0.935310,0.913531,0.317863,0.820307,0.835237,0.540019,0.911419,0.954471,0.690376,0.256818,0.980503,0.956317,0.386139,0.615698,0.752012,0.972446,0.984910,0.865270,0.887163,0.985729,0.210644,0.928169,0.936200,0.192628,0.297111,0.591241,0.655270,0.941295,0.278259,0.295034,0.621185,0.720649,0.286668,0.628960,0.993537,0.7…	101	123	2255	2477	na	na	0	na	na	0.463842	0.531626	2355	2377	462	2363	0	1	0	-1	0.995268	-1	FALSE
all	PAM16_A375_gRNA169	A375	PAM16	CTGCCCACCACCTGCACGCCCAT	ATGGGCGTGCAGGTGGTGGGCAG	ENST00000318059	CGACCACGCTTGATCCCCGGCCGCGGGGCCAGGAAGTCGGAGTTTGAGCCCCGGAGGCAGAGCGGCTGCCATGGCCAAGTACCTGGCCCAGATCATTGTGATGGGCGTGCAGGTGGTGGGCAGGGCCTTTGCACGGGCCTTGCGGCAGGAGTTTGCAGCCAGCCGGGCCGCAGCTGATGCCCGAGGACGCGCTGGACACCGGTCTGCAGCCGCTTCCAACCTC	aacccctaccaactggtcggggtttgaaac	-12.9	((((((.(((....))).)))))).......(((.........))).......	-47.39	-1,-1,-1,-1,-1,-1,-1,-1,-1,-1,-1,-1,-1,-1,-1,-1,-1,-1,-1,-1,-1,-1,-1,-1,-1,-1,-1,-1,-1,-1,-1,-1,-1,-1,-1,-1,-1,-1,-1,-1,-1,-1,-1,-1,-1,-1,-1,-1,-1,-1,-1,-1,-1,-1,-1,-1,-1,-1,-1,-1,-1,-1,-1,-1,-1,-1,-1,-1,-1,-1,-1,-1,-1,-1,-1,-1,-1,-1,-1,-1,-1,-1,-1,-1,-1,-1,-1,-1,-1,-1,-1,-1,-1,-1,-1,-1,-1,-1,-1,-1,-1,-1,-1,-1,-1,-1,-1,-1,-1,-1,-1,-1,-1,-1,-1,-1,-1,-1,-1,-1,-1,-1,-1,-1,-1,-1,-1,-1,-1,-1,-1,-1,-1,…	0.649988,0.732424,0.290006,0.385358,0.223609,0.702526,0.714432,0.831949,0.845520,0.480516,0.030559,0.884889,0.056076,0.581542,0.345590,0.000175,0.016114,0.189537,0.856279,0.606317,0.773683,0.936353,0.356434,0.877640,0.360165,0.004339,0.381891,0.612819,0.804133,0.175246,0.168685,0.652997,0.921976,0.462766,0.568948,0.651691,0.196937,0.188597,0.878685,0.000052,0.826882,0.216960,0.421006,0.267315,0.7…	101	123	69	291	na	na	0	na	na	0.286201	0.674617	169	191	139	513	0	1	0	-1	0.08	-1	FALSE
all	PAM16_A375_gRNA170	A375	PAM16	CCTGCCCACCACCTGCACGCCCA	TGGGCGTGCAGGTGGTGGGCAGG	ENST00000318059	GACCACGCTTGATCCCCGGCCGCGGGGCCAGGAAGTCGGAGTTTGAGCCCCGGAGGCAGAGCGGCTGCCATGGCCAAGTACCTGGCCCAGATCATTGTGATGGGCGTGCAGGTGGTGGGCAGGGCCTTTGCACGGGCCTTGCGGCAGGAGTTTGCAGCCAGCCGGGCCGCAGCTGATGCCCGAGGACGCGCTGGACACCGGTCTGCAGCCGCTTCCAACCTCT	aacccctaccaactggtcggggtttgaaac	-12.9	((((((.(((....))).))))))........(((.........)))......	-49.49	-1,-1,-1,-1,-1,-1,-1,-1,-1,-1,-1,-1,-1,-1,-1,-1,-1,-1,-1,-1,-1,-1,-1,-1,-1,-1,-1,-1,-1,-1,-1,-1,-1,-1,-1,-1,-1,-1,-1,-1,-1,-1,-1,-1,-1,-1,-1,-1,-1,-1,-1,-1,-1,-1,-1,-1,-1,-1,-1,-1,-1,-1,-1,-1,-1,-1,-1,-1,-1,-1,-1,-1,-1,-1,-1,-1,-1,-1,-1,-1,-1,-1,-1,-1,-1,-1,-1,-1,-1,-1,-1,-1,-1,-1,-1,-1,-1,-1,-1,-1,-1,-1,-1,-1,-1,-1,-1,-1,-1,-1,-1,-1,-1,-1,-1,-1,-1,-1,-1,-1,-1,-1,-1,-1,-1,-1,-1,-1,-1,-1,-1,-1,-1,…	0.461717,0.667938,0.325181,0.244845,0.238165,0.723043,0.704850,0.808111,0.821392,0.467267,0.029310,0.893320,0.095069,0.570685,0.330449,0.000153,0.008765,0.169759,0.810582,0.333832,0.755437,0.928135,0.267689,0.872186,0.328601,0.002626,0.339332,0.580970,0.740128,0.198072,0.197217,0.684602,0.913752,0.479524,0.531338,0.584264,0.184943,0.142094,0.828719,0.000035,0.725329,0.216100,0.401760,0.249074,0.7…	101	123	70	292	na	na	0	na	na	0.287905	0.672913	170	192	139	513	0	1	0	-1	0.0826667	-1	FALSE
all	PAM16_A375_gRNA175	A375	PAM16	AAGGCCCTGCCCACCACCTGCAC	GTGCAGGTGGTGGGCAGGGCCTT	ENST00000318059	CGCTTGATCCCCGGCCGCGGGGCCAGGAAGTCGGAGTTTGAGCCCCGGAGGCAGAGCGGCTGCCATGGCCAAGTACCTGGCCCAGATCATTGTGATGGGCGTGCAGGTGGTGGGCAGGGCCTTTGCACGGGCCTTGCGGCAGGAGTTTGCAGCCAGCCGGGCCGCAGCTGATGCCCGAGGACGCGCTGGACACCGGTCTGCAGCCGCTTCCAACCTCTCCGGC	aacccctaccaactggtcggggtttgaaac	-15.1	((((((.(((....))).))))))........(((...)))............	-46.56	-1,-1,-1,-1,-1,-1,-1,-1,-1,-1,-1,-1,-1,-1,-1,-1,-1,-1,-1,-1,-1,-1,-1,-1,-1,-1,-1,-1,-1,-1,-1,-1,-1,-1,-1,-1,-1,-1,-1,-1,-1,-1,-1,-1,-1,-1,-1,-1,-1,-1,-1,-1,-1,-1,-1,-1,-1,-1,-1,-1,-1,-1,-1,-1,-1,-1,-1,-1,-1,-1,-1,-1,-1,-1,-1,-1,-1,-1,-1,-1,-1,-1,-1,-1,-1,-1,-1,-1,-1,-1,-1,-1,-1,-1,-1,-1,-1,-1,-1,-1,-1,-1,-1,-1,-1,-1,-1,-1,-1,-1,-1,-1,-1,-1,-1,-1,-1,-1,-1,-1,-1,-1,-1,-1,-1,-1,-1,-1,-1,-1,-1,-1,-1,…	0.521019,0.575757,0.512154,0.129097,0.128568,0.700514,0.670570,0.655176,0.762789,0.541649,0.013181,0.814225,0.169089,0.381086,0.422290,0.000547,0.008204,0.066978,0.668602,0.176609,0.747059,0.862038,0.185747,0.851246,0.637723,0.001127,0.298082,0.052713,0.767918,0.155813,0.168583,0.412040,0.942020,0.463120,0.298600,0.564978,0.132578,0.095280,0.778598,0.000083,0.774391,0.171222,0.558855,0.288275,0.6…	101	123	75	297	na	na	0	na	na	0.296422	0.664395	175	197	139	513	0	1	0	-1	0.096	-1	FALSE
all	PAM16_A375_gRNA259	A375	PAM16	GCGGCTGCAGACCGGTGTCCAGC	GCTGGACACCGGTCTGCAGCCGC	ENST00000318059	GATCATTGTGATGGGCGTGCAGGTGGTGGGCAGGGCCTTTGCACGGGCCTTGCGGCAGGAGTTTGCAGCCAGCCGGGCCGCAGCTGATGCCCGAGGACGCGCTGGACACCGGTCTGCAGCCGCTTCCAACCTCTCCGGCCTCAGCCTCCAGGAGGCACAGCAGATTCTCAACGTGTCCAAGCTGAGCCCTGAGGAGGTCCAGAAGAACTATGAACACTTATTT	aacccctaccaactggtcggggtttgaaac	-17.4	((((((.(((....))).)))))).........((((..(((....)))))))	-42.42	-1,-1,-1,-1,-1,-1,-1,-1,-1,-1,-1,-1,-1,-1,-1,-1,-1,-1,-1,-1,-1,-1,-1,-1,-1,-1,-1,-1,-1,-1,-1,-1,-1,-1,-1,-1,-1,-1,-1,-1,-1,-1,-1,-1,-1,-1,-1,-1,-1,-1,-1,-1,-1,-1,-1,-1,-1,-1,-1,-1,-1,-1,-1,-1,-1,-1,-1,-1,0,0.336,0.28,1,0.28,0.28,0.28,0.168,0,0.056,0.168,0.112,0.336,0.168,0.28,0.28,0.224,1,0.785,0.392,0.056,0.056,0,0.168,0.392,0.448,0.392,0.902,0.504,0.168,0.824,0.616,0.28,0.224,0.168,0,0.729,0.90…	0.181152,0.425994,0.601512,0.003309,0.015004,0.621292,0.037041,0.008864,0.142885,0.517355,0.042520,0.331750,0.445496,0.016668,0.784960,0.040648,0.001490,0.000380,0.037372,0.008172,0.123103,0.360890,0.018769,0.171960,0.050668,0.002378,0.083730,0.000063,0.010689,0.573684,0.440053,0.005347,0.784844,0.545929,0.261149,0.312066,0.013660,0.002224,0.768804,0.002855,0.074331,0.644461,0.007881,0.170318,0.7…	101	123	159	381	na	na	0	na	na	0.439523	0.521295	259	281	139	513	0	1	0	-1	0.32	-1	FALSE
all	PAM16_A375_gRNA327	A375	PAM16	CAGGGCTCAGCTTGGACACGTTG	CAACGTGTCCAAGCTGAGCCCTG	ENST00000318059	CCAGCCGGGCCGCAGCTGATGCCCGAGGACGCGCTGGACACCGGTCTGCAGCCGCTTCCAACCTCTCCGGCCTCAGCCTCCAGGAGGCACAGCAGATTCTCAACGTGTCCAAGCTGAGCCCTGAGGAGGTCCAGAAGAACTATGAACACTTATTTAAGGTGAATGATAAATCCGTGGGTGGCTCCTTCTACCTGCAGTCAAAGGTGGTCCGCGCAAAGGAGCG	aacccctaccaactggtcggggtttgaaac	-18.8	((((((.(((....))).)))))).....(((((......)))))........	-43.4	0,0.336,0.28,1,0.28,0.28,0.28,0.168,0,0.056,0.168,0.112,0.336,0.168,0.28,0.28,0.224,1,0.785,0.392,0.056,0.056,0,0.168,0.392,0.448,0.392,0.902,0.504,0.168,0.824,0.616,0.28,0.224,0.168,0,0.729,0.902,0.673,0.336,0.28,0,0.336,0.224,0,0.112,0.785,0.168,0.28,0.28,0.168,0.056,0.28,0.28,0.392,1,0.336,0.224,0.785,0.785,0.224,0,0.336,0.28,0.336,0.729,0.056,0.168,0.168,0.336,0.224,0.448,0.336,0.616,0.863,0.…	0.260555,0.487073,0.711996,0.427107,0.148535,0.765943,0.332895,0.413727,0.298293,0.787516,0.560729,0.323789,0.517614,0.683250,0.639892,0.106406,0.013190,0.120505,0.115423,0.041575,0.518376,0.824735,0.040888,0.798686,0.419229,0.716178,0.097264,0.014931,0.720265,0.416814,0.023531,0.049828,0.173529,0.020245,0.291095,0.010604,0.033209,0.002376,0.367480,0.057196,0.024743,0.231551,0.002377,0.028918,0.7…	101	123	227	449	na	na	0	na	na	0.555366	0.405451	327	349	139	513	0	1	0	-1	0.501333	-1	FALSE
all	PAM16_A375_gRNA351	A375	PAM16	GTTCATAGTTCTTCTGGACCTCC	GGAGGTCCAGAAGAACTATGAAC	ENST00000318059	GAGGACGCGCTGGACACCGGTCTGCAGCCGCTTCCAACCTCTCCGGCCTCAGCCTCCAGGAGGCACAGCAGATTCTCAACGTGTCCAAGCTGAGCCCTGAGGAGGTCCAGAAGAACTATGAACACTTATTTAAGGTGAATGATAAATCCGTGGGTGGCTCCTTCTACCTGCAGTCAAAGGTGGTCCGCGCAAAGGAGCGCCTGGATGAGGAACTCAAAATCCA	aacccctaccaactggtcggggtttgaaac	-15.3	((((((.(((....))).)))))).............((((....))))....	-37.99	0.392,0.448,0.392,0.902,0.504,0.168,0.824,0.616,0.28,0.224,0.168,0,0.729,0.902,0.673,0.336,0.28,0,0.336,0.224,0,0.112,0.785,0.168,0.28,0.28,0.168,0.056,0.28,0.28,0.392,1,0.336,0.224,0.785,0.785,0.224,0,0.336,0.28,0.336,0.729,0.056,0.168,0.168,0.336,0.224,0.448,0.336,0.616,0.863,0.28,0.056,0.056,0.056,0.112,0.855,0.496,0.275,0.496,0.606,0,0,0.27,0.054,0.324,0.738,0.158,1,0.58,0.527,0.962,0.919,1,1…	0.475542,0.577881,0.646314,0.318896,0.221551,0.635300,0.532095,0.671751,0.548521,0.911137,0.570038,0.320656,0.724055,0.929092,0.687478,0.155370,0.024608,0.301203,0.544194,0.249126,0.691140,0.956213,0.207997,0.957299,0.746419,0.892446,0.173856,0.513784,0.726851,0.145044,0.090182,0.173939,0.217843,0.080524,0.132296,0.025102,0.123025,0.016288,0.262362,0.205845,0.081404,0.296746,0.014215,0.052256,0.7…	101	123	251	473	na	na	0	na	na	0.596252	0.364566	351	373	139	513	0	1	0	-1	0.565333	-1	FALSE
all	EIF3B_A375_gRNA874	A375	EIF3B	ATCCCACTCGTCACTGATCGTCA	TGACGATCAGTGACGAGTGGGAT	ENST00000360876	CCTGCCCACGCTGTGGATGCTGTGAAGAACGCCGACGGCTACAAGCTTGACAAGCAGCACACATTCCGGGTCAACCTCTTTACGGATTTTGACAAGTATATGACGATCAGTGACGAGTGGGATATTCCAGAGAAACAGCCTTTCAAAGACCTGGGGAACTTACGTTACTGGCTTGAAGAGGCAGAATGCAGAGATCAGTACAGTGTGATTTTTGAGAGTGGAG	aacccctaccaactggtcggggtttgaaac	-12.8	((((((.(((....))).)))))).............................	-42.45	0.196,0.319,0.515,0.245,-1,-1,-1,-1,-1,-1,-1,-1,-1,-1,-1,-1,-1,-1,-1,-1,-1,-1,-1,-1,-1,-1,-1,-1,-1,-1,-1,-1,-1,-1,-1,-1,-1,-1,-1,-1,-1,-1,-1,-1,-1,-1,-1,-1,-1,-1,-1,-1,-1,-1,-1,-1,-1,-1,-1,-1,-1,-1,-1,-1,-1,-1,-1,-1,-1,-1,-1,-1,-1,-1,-1,-1,-1,-1,-1,-1,-1,-1,-1,-1,-1,-1,-1,-1,-1,-1,-1,-1,-1,-1,-1,-1,-1,-1,-1,-1,-1,-1,-1,-1,-1,-1,-1,-1,-1,-1,-1,-1,-1,-1,-1,-1,-1,-1,-1,-1,-1,-1,-1,-1,-1,-1,-1,-1,-1,…	0.620512,0.281622,0.351439,0.411364,0.467950,0.145670,0.490315,0.674005,0.596726,0.877617,0.072274,0.604560,0.008820,0.989558,0.443570,0.001829,0.039610,0.262468,0.460936,0.118265,0.783508,0.975891,0.336231,0.892609,0.721523,0.838150,0.077527,0.743912,0.780952,0.267125,0.124406,0.143301,0.319690,0.239342,0.557914,0.131017,0.131245,0.338434,0.297206,0.001107,0.484433,0.032589,0.209142,0.057505,0.2…	101	123	774	996	na	na	0	na	na	0.285761	0.70671	874	896	57	2498	0	1	0	-1	0.334562	-1	FALSE
all	EIF3B_A375_gRNA876	A375	EIF3B	ATATCCCACTCGTCACTGATCGT	ACGATCAGTGACGAGTGGGATAT	ENST00000360876	TGCCCACGCTGTGGATGCTGTGAAGAACGCCGACGGCTACAAGCTTGACAAGCAGCACACATTCCGGGTCAACCTCTTTACGGATTTTGACAAGTATATGACGATCAGTGACGAGTGGGATATTCCAGAGAAACAGCCTTTCAAAGACCTGGGGAACTTACGTTACTGGCTTGAAGAGGCAGAATGCAGAGATCAGTACAGTGTGATTTTTGAGAGTGGAGAC	aacccctaccaactggtcggggtttgaaac	-12.8	((((((.(((....))).)))))).............................	-40.51	0.515,0.245,-1,-1,-1,-1,-1,-1,-1,-1,-1,-1,-1,-1,-1,-1,-1,-1,-1,-1,-1,-1,-1,-1,-1,-1,-1,-1,-1,-1,-1,-1,-1,-1,-1,-1,-1,-1,-1,-1,-1,-1,-1,-1,-1,-1,-1,-1,-1,-1,-1,-1,-1,-1,-1,-1,-1,-1,-1,-1,-1,-1,-1,-1,-1,-1,-1,-1,-1,-1,-1,-1,-1,-1,-1,-1,-1,-1,-1,-1,-1,-1,-1,-1,-1,-1,-1,-1,-1,-1,-1,-1,-1,-1,-1,-1,-1,-1,-1,-1,-1,-1,-1,-1,-1,-1,-1,-1,-1,-1,-1,-1,-1,-1,-1,-1,-1,-1,-1,-1,-1,-1,-1,-1,-1,-1,-1,-1,-1,-1,-1,…	0.582244,0.353953,0.460209,0.356040,0.415677,0.132135,0.349004,0.564194,0.534759,0.920627,0.014115,0.631824,0.013213,0.989297,0.534035,0.001215,0.046161,0.262571,0.479203,0.082245,0.735987,0.973478,0.387091,0.853453,0.530976,0.812070,0.103686,0.791350,0.658948,0.231901,0.113593,0.116288,0.400710,0.230353,0.580286,0.101228,0.096842,0.297918,0.300946,0.000781,0.391755,0.027056,0.337025,0.080927,0.3…	101	123	776	998	na	na	0	na	na	0.286416	0.706056	876	898	57	2498	0	1	0	-1	0.335381	-1	FALSE
all	EIF3B_A375_gRNA961	A375	EIF3B	AATCACACTGTACTGATCTCTGC	GCAGAGATCAGTACAGTGTGATT	ENST00000360876	TTTGACAAGTATATGACGATCAGTGACGAGTGGGATATTCCAGAGAAACAGCCTTTCAAAGACCTGGGGAACTTACGTTACTGGCTTGAAGAGGCAGAATGCAGAGATCAGTACAGTGTGATTTTTGAGAGTGGAGACCGCACTTCCATATTCTGGAATGACGTAAAAGACCCTGTCTCAATTGAAGAAAGAGCGAGATGGACAGAGACGTATGTGCGTTGGT	aacccctaccaactggtcggggtttgaaac	-13.3	((((((.(((....))).)))))).......((((........))))......	-37.15	-1,-1,-1,-1,-1,-1,-1,-1,-1,-1,-1,-1,-1,-1,-1,-1,-1,-1,-1,-1,-1,-1,-1,-1,-1,-1,-1,-1,-1,-1,-1,-1,-1,-1,-1,-1,-1,-1,-1,-1,-1,-1,-1,-1,-1,-1,-1,-1,-1,-1,-1,-1,-1,-1,-1,-1,-1,-1,-1,-1,-1,-1,-1,-1,-1,-1,0.221,0.522,1,0.582,0.363,0.282,0.745,1,0.524,0.526,0.486,0.526,0.567,0.243,0.102,0.102,0.203,0.102,0.041,0.061,0.02,0.082,0.469,0.143,0.328,0.061,0.102,0.123,0.328,0.287,0.205,0.43,0.328,0.553,0.409,0…	0.376460,0.559521,0.730279,0.104713,0.209839,0.777459,0.041523,0.842758,0.898908,0.983901,0.993985,0.006652,0.828726,0.993839,0.972649,0.009672,0.301852,0.141269,0.383989,0.023083,0.920062,0.416155,0.180647,0.934412,0.847807,0.945472,0.708322,0.286346,0.855158,0.510263,0.992532,0.670637,0.549523,0.012513,0.993247,0.056619,0.192870,0.076736,0.007634,0.939690,0.024901,0.022738,0.120475,0.767064,0.5…	101	123	861	1083	na	na	0	na	na	0.314239	0.678232	961	983	57	2498	0	1	0	-1	0.370188	-1	FALSE
all	EIF3B_A375_gRNA1590	A375	EIF3B	CAATGGAGCTTGCAGTCCACCAC	GTGGTGGACTGCAAGCTCCATTG	ENST00000360876	AATCGCCTTCTGGGTGCCTGAAGACAAAGATATTCCAGCCAGGGTAACCCTGATGCAGCTCCCTACCAGGCAAGAGATCCGAGTGAGGAACCTGTTCAATGTGGTGGACTGCAAGCTCCATTGGCAGAAGAACGGAGACTACTTGTGTGTGAAAGTAGATAGGACTCCGAAAGGCACCCAGGGTGTTGTCACAAATTTTGAAATTTTCCGAATGAGGGAGAAA	aacccctaccaactggtcggggtttgaaac	-16.3	((((((.(((....))).)))))).........((((........))))....	-36.41	1,1,1,0.785,0.255,0.172,0.451,1,0.941,0.386,0.242,0,0.176,0.088,0.176,0.135,0.067,0.112,0.314,0.629,0.851,0.481,0.641,0.458,0.481,0.328,0.924,0.445,0.562,0.608,0.843,0.407,0.574,0.502,0.12,0.515,0.368,0.417,0.221,0.27,0.025,0.025,0,0.075,0.326,1,0.384,0.205,0.026,0.102,0.078,0.287,0.365,0.261,0.026,0.292,0.345,0.08,0.186,0.106,0.054,0.054,0.135,0.324,0.378,0.165,0.192,0.082,0.192,0.11,0.194,0.678…	0.924165,0.518046,0.270650,0.127283,0.283414,0.318299,0.033814,0.367386,0.840464,0.979789,0.822074,0.275765,0.541918,0.955975,0.985479,0.218448,0.148201,0.105291,0.560941,0.060089,0.721331,0.454016,0.344309,0.844319,0.408422,0.954357,0.236674,0.086538,0.713589,0.541104,0.998323,0.670871,0.899756,0.011932,0.710432,0.196916,0.149346,0.008306,0.108215,0.086651,0.015825,0.845152,0.353601,0.069709,0.9…	101	123	1490	1712	na	na	0	na	na	0.520131	0.47234	1590	1612	57	2498	0	1	0	-1	0.627764	-1	FALSE
all	EIF3B_A375_gRNA2082	A375	EIF3B	AGCCAGTACGCGTTGTCCACCTT	AAGGTGGACAACGCGTACTGGCT	ENST00000360876	CTGCACGGTCATGAACATCGCAGAGCACTACATGGCTTCCGACGTCGAATGGGATCCTACTGGGCGCTACGTCGTCACCTCTGTGTCCTGGTGGAGCCATAAGGTGGACAACGCGTACTGGCTGTGGACTTTCCAGGGACGCCTCCTGCAGAAGAACAACAAGGACCGCTTCTGCCAGCTGCTGTGGCGGCCCCGGCCTCCCACACTCCTGAGCCAGGAACAG	aacccctaccaactggtcggggtttgaaac	-16	((((((.(((....))).))))))....(((((........))))).......	-41.37	0.091,0.382,0.6,0.436,0.4,0.236,0.418,0.327,0.073,0.491,0.727,0.582,0.854,1,0.673,0.764,0.2,0.255,0.218,0.127,0.273,0.345,0.932,0.527,0.345,0.255,0.164,0.255,0.527,0.473,0.691,0.345,0.127,0.436,0.073,0.091,0.273,0.345,0.091,0.4,0.236,0.236,0.345,0.364,0.182,0.255,0.618,1,0.709,0.291,0.236,0.2,0.709,0.98,0.182,0.127,0.291,0.745,0.727,0.436,0.236,0.236,0.073,0.182,0.127,0.236,0.382,1,0.891,0.691,0.…	0.232351,0.604867,0.029638,0.014578,0.083390,0.214427,0.011201,0.037255,0.570066,0.902326,0.941745,0.125246,0.054754,0.038907,0.985859,0.320238,0.476263,0.162653,0.058772,0.006998,0.340134,0.469818,0.055598,0.215648,0.012943,0.560669,0.413838,0.013817,0.271781,0.116748,0.871295,0.023356,0.969188,0.149700,0.920469,0.021123,0.017380,0.013468,0.685560,0.015806,0.702825,0.097202,0.008785,0.020160,0.1…	101	123	1982	2204	na	na	0	na	na	0.681178	0.311293	2082	2104	57	2498	0	1	0	-1	0.829238	-1	FALSE
all	EIF3B_A375_gRNA2083	A375	EIF3B	CAGCCAGTACGCGTTGTCCACCT	AGGTGGACAACGCGTACTGGCTG	ENST00000360876	TGCACGGTCATGAACATCGCAGAGCACTACATGGCTTCCGACGTCGAATGGGATCCTACTGGGCGCTACGTCGTCACCTCTGTGTCCTGGTGGAGCCATAAGGTGGACAACGCGTACTGGCTGTGGACTTTCCAGGGACGCCTCCTGCAGAAGAACAACAAGGACCGCTTCTGCCAGCTGCTGTGGCGGCCCCGGCCTCCCACACTCCTGAGCCAGGAACAGA	aacccctaccaactggtcggggtttgaaac	-14.6	((((((.(((....))).))))))......((((........)))).......	-42.16	0.382,0.6,0.436,0.4,0.236,0.418,0.327,0.073,0.491,0.727,0.582,0.854,1,0.673,0.764,0.2,0.255,0.218,0.127,0.273,0.345,0.932,0.527,0.345,0.255,0.164,0.255,0.527,0.473,0.691,0.345,0.127,0.436,0.073,0.091,0.273,0.345,0.091,0.4,0.236,0.236,0.345,0.364,0.182,0.255,0.618,1,0.709,0.291,0.236,0.2,0.709,0.98,0.182,0.127,0.291,0.745,0.727,0.436,0.236,0.236,0.073,0.182,0.127,0.236,0.382,1,0.891,0.691,0.4,0.25…	0.214910,0.515228,0.050143,0.022686,0.093806,0.180719,0.006178,0.031440,0.394482,0.916779,0.932146,0.077189,0.096930,0.061774,0.980020,0.475085,0.430662,0.113202,0.037625,0.006373,0.323846,0.401791,0.052900,0.190511,0.033603,0.570492,0.399701,0.012105,0.211478,0.081586,0.735366,0.009031,0.978787,0.221025,0.889343,0.019908,0.007905,0.012511,0.460652,0.006191,0.567287,0.100347,0.009000,0.023610,0.2…	101	123	1983	2205	na	na	0	na	na	0.681506	0.310966	2083	2105	57	2498	0	1	0	-1	0.829648	-1	FALSE
all	SARS1_A375_gRNA76	A375	SARS1	AACAAATCCAGATCCAGCACCAT	ATGGTGCTGGATCTGGATTTGTT	ENST00000234677	GCAGTGCGGCGGTCACAGGCTGAGTGCTGCGGCGCGATCCTTGCTTCCCTGAGCGTTGGCCCGGGAGGAAAGAAGATGGTGCTGGATCTGGATTTGTTTCGGGTGGATAAAGGAGGGGACCCAGCCCTCATCCGAGAGACGCAGGAGAAGCGCTTCAAGGACCCGGGACTAGTGGACCAGCTGGTGAAGGCAGACAGC	aacccctaccaactggtcggggtttgaaac	-14.7	............((((((.(((((((......))))))).)).))))......	-39.77	-1,-1,-1,-1,-1,-1,-1,-1,-1,-1,-1,-1,-1,-1,-1,-1,-1,-1,-1,-1,-1,-1,-1,-1,-1,-1,-1,-1,-1,-1,-1,-1,-1,-1,-1,-1,0.158,0.526,0.105,0.211,0.263,0.526,0,0.158,0.105,0.211,0,0,0.263,0.158,0.053,0.895,0.158,0,0.158,0.421,0.263,0.737,0,0,0,0.158,0,0.105,0.158,0,0.053,0.368,0.421,0.368,0.316,0.421,1,0.632,0.158,0.316,0.053,0.579,0.105,0.421,0.105,0.263,0.158,0.053,0.211,0.789,0.368,0.053,0.211,0.368,0.316,0…	0.436937,0.557541,0.019061,0.038210,0.380013,0.932244,0.141006,0.015606,0.046280,0.878722,0.696228,0.007993,0.692153,0.472754,0.969789,0.595404,0.076784,0.060446,0.863208,0.160390,0.873702,0.539469,0.097734,0.279690,0.050634,0.518393,0.950354,0.372141,0.547501,0.635224,0.880484,0.034616,0.327712,0.658744,0.904967,0.674630,0.040133,0.090872,0.154632,0.310669,0.008477,0.373753,0.018526,0.104169,0.8…	76	98	1	198	na	na	0	na	na	0.0404968	0.947084	76	98	76	1617	0	1	0	-1	0	-1	FALSE
all	SARS1_A375_gRNA194	A375	SARS1	TCTACATCGTCGCCACTCGCTGT	ACAGCGAGTGGCGACGATGTAGA	ENST00000234677	TTGTTTCGGGTGGATAAAGGAGGGGACCCAGCCCTCATCCGAGAGACGCAGGAGAAGCGCTTCAAGGACCCGGGACTAGTGGACCAGCTGGTGAAGGCAGACAGCGAGTGGCGACGATGTAGATTTCGGGCAGACAACTTGAACAAGCTGAAGAACCTATGCAGCAAGACAATCGGAGAGAAAATGAAGAAAAAAGAGCCAGTGGGAGATGATGAGTCTGTCC	aacccctaccaactggtcggggtttgaaac	-14.1	((((((.(((....))).)))))).........(((.((........)).)))	-41.63	0.263,0.368,0.368,0.263,0.263,0.053,0.158,0.211,0.211,0.526,0.316,0.158,0.158,0.368,0.789,0.842,1,0.421,0.368,0.316,0.053,0.053,0.105,0.053,0.211,0.947,0.053,0.105,0,0.316,0.263,0.053,0.053,0.053,0.053,0.632,0.368,0.474,0.263,0.105,0.368,0.211,0.368,0.105,0.421,0.316,0.368,0,0.053,0.421,0.789,1,1,1,1,1,0.053,0.105,0.421,0.053,0.789,0.316,0.895,1,0.421,0.421,1,0.842,0.158,0.211,0.053,0.053,0.316,0…	0.963846,0.329831,0.634142,0.768438,0.905112,0.257426,0.138138,0.061646,0.872012,0.976846,0.370450,0.062213,0.587490,0.995505,0.913590,0.449565,0.734150,0.434186,0.424620,0.442161,0.743707,0.675484,0.794430,0.770627,0.781951,0.970910,0.345397,0.185709,0.664041,0.098100,0.368957,0.351262,0.691680,0.497905,0.253280,0.101234,0.055595,0.049569,0.321017,0.525122,0.021424,0.572865,0.192163,0.324817,0.8…	101	123	94	316	na	na	0	na	na	0.104212	0.883369	194	216	76	1617	0	1	0	-1	0.076524	-1	FALSE
all	SARS1_A375_gRNA349	A375	SARS1	TTCAGGTTAGCTAAAGCGTCTGC	GCAGACGCTTTAGCTAACCTGAA	ENST00000234677	CCTATGCAGCAAGACAATCGGAGAGAAAATGAAGAAAAAAGAGCCAGTGGGAGATGATGAGTCTGTCCCAGAGAATGTGCTGAGTTTCGATGACCTTACTGCAGACGCTTTAGCTAACCTGAAAGTCTCACAAATCAAAAAAGTCCGACTCCTCATTGATGAAGCCATCCTGAAGTGTGACGCGGAGCGGATAAAGTTGGAAGCAGAGCGGTTTGAGAACCTC	aacccctaccaactggtcggggtttgaaac	-14.8	((((((.(((....))).)))))).((..(((.((.....)).)))..))...	-37.28	-1,-1,-1,-1,-1,-1,-1,-1,-1,-1,-1,-1,-1,-1,-1,-1,-1,-1,-1,-1,-1,-1,-1,-1,-1,-1,-1,-1,-1,-1,-1,-1,-1,-1,-1,-1,-1,-1,-1,-1,-1,-1,-1,-1,-1,-1,-1,-1,-1,-1,-1,-1,-1,-1,-1,-1,-1,-1,-1,-1,-1,-1,-1,-1,-1,-1,-1,-1,-1,-1,-1,-1,-1,-1,-1,-1,-1,-1,-1,-1,-1,-1,-1,-1,-1,-1,-1,-1,-1,-1,-1,-1,-1,-1,-1,-1,-1,-1,-1,-1,-1,-1,-1,-1,-1,-1,-1,-1,-1,-1,-1,-1,-1,-1,-1,0.595,0.396,0.132,0.264,0.264,0.132,0.659,0.659,0.329,…	0.798745,0.108730,0.119909,0.191776,0.633583,0.187911,0.033938,0.079455,0.024897,0.952444,0.064212,0.031860,0.246310,0.977659,0.696971,0.361116,0.297995,0.344925,0.577297,0.451156,0.815702,0.942870,0.421313,0.818245,0.457717,0.557452,0.321639,0.808534,0.312658,0.120742,0.684291,0.012309,0.033579,0.020415,0.414474,0.005080,0.024591,0.101270,0.014080,0.072918,0.039042,0.467882,0.402169,0.091782,0.2…	101	123	249	471	na	na	0	na	na	0.187905	0.799676	349	371	76	1617	0	1	0	-1	0.177043	-1	FALSE
all	SARS1_A375_gRNA1108	A375	SARS1	TAGAACTCCTCTGCGGTGGTAAT	ATTACCACCGCAGAGGAGTTCTA	ENST00000234677	CACCCGTGGCATCTTCCGAGTCCATCAGTTTGAGAAGATTGAACAGTTTGTGTACTCATCACCCCATGACAACAAGTCATGGGAGATGTTTGAAGAGATGATTACCACCGCAGAGGAGTTCTACCAGTCCCTGGGGATTCCTTACCACATTGTGAATATTGTCTCAGGTTCTTTGAATCATGCTGCCAGTAAGAAGCTTGACCTGGAGGCCTGGTTTCCGGGC	aacccctaccaactggtcggggtttgaaac	-15.8	......(((((.(((...(((((((.......)))))))....))))))))..	-38.61	1,0.232,0.31,0,0.31,0.31,0.156,0.467,0.156,0.156,0,0,0.235,0.078,0.313,0,0.079,0.394,0.551,0.157,0.157,0.158,0.158,0.079,0.158,0.079,0.479,0.798,0.239,0.559,0.16,0.918,0.804,0.161,0.644,0.402,0,-1,-1,-1,-1,-1,-1,-1,-1,-1,-1,-1,-1,-1,-1,-1,-1,-1,-1,-1,-1,-1,0.136,0.455,0.909,0.227,0,0,0.091,0,0,0.364,0.045,0.091,1,1,1,1,1,0.045,0.045,0.182,-1,-1,-1,-1,-1,-1,-1,-1,-1,-1,-1,-1,-1,-1,-1,-1,-1,-1,-1,-…	0.920851,0.557473,0.439149,0.068746,0.533005,0.228497,0.569042,0.828606,0.861265,0.836580,0.412666,0.659871,0.079178,0.966002,0.285642,0.037066,0.255740,0.636054,0.721754,0.875613,0.908634,0.994222,0.581269,0.935714,0.141562,0.416606,0.222153,0.550082,0.524363,0.145539,0.027075,0.063601,0.391054,0.160734,0.134695,0.005751,0.157006,0.024039,0.313815,0.008859,0.013632,0.065349,0.211260,0.074824,0.4…	101	123	1008	1230	na	na	0	na	na	0.597732	0.389849	1108	1130	76	1617	0	1	0	-1	0.669261	-1	FALSE
all	SARS1_A375_gRNA1185	A375	SARS1	CAAGCTTCTTACTGGCAGCATGA	TCATGCTGCCAGTAAGAAGCTTG	ENST00000234677	CATGGGAGATGTTTGAAGAGATGATTACCACCGCAGAGGAGTTCTACCAGTCCCTGGGGATTCCTTACCACATTGTGAATATTGTCTCAGGTTCTTTGAATCATGCTGCCAGTAAGAAGCTTGACCTGGAGGCCTGGTTTCCGGGCTCAGGAGCCTTCCGTGAGTTGGTCTCCTGTTCTAATTGCACGGATTACCAGGCTCGCCGGCTTCGAATCCGATATGG	aacccctaccaactggtcggggtttgaaac	-16.9	((((((.(((....))).))))))......((.(((.((....)).))).)).	-35.14	0.182,-1,-1,-1,-1,-1,-1,-1,-1,-1,-1,-1,-1,-1,-1,-1,-1,-1,-1,-1,-1,-1,-1,-1,-1,-1,-1,-1,-1,-1,-1,-1,-1,-1,-1,-1,-1,-1,-1,-1,-1,-1,-1,-1,-1,-1,-1,-1,-1,-1,-1,-1,-1,-1,-1,-1,-1,-1,-1,-1,-1,-1,-1,-1,-1,-1,-1,-1,-1,-1,-1,-1,-1,-1,-1,-1,-1,-1,-1,-1,-1,-1,-1,-1,-1,-1,-1,-1,-1,-1,0.071,0.035,0.071,0.035,0.035,0.106,0.105,0.035,0.176,0.105,0.035,0.14,0.105,0.105,0,0,0.035,0.035,0,0.035,0.104,0.069,0.207,0…	0.611178,0.744905,0.636280,0.325161,0.966303,0.755713,0.231668,0.836452,0.969969,0.855946,0.197483,0.329411,0.230914,0.937560,0.891586,0.074912,0.460027,0.425532,0.703486,0.457961,0.881878,0.844462,0.847798,0.959869,0.603199,0.218461,0.532284,0.853600,0.993546,0.237384,0.763045,0.738216,0.601034,0.037397,0.969000,0.153970,0.471242,0.721359,0.623017,0.121066,0.599693,0.335711,0.227131,0.333211,0.8…	101	123	1085	1307	na	na	0	na	na	0.639309	0.348272	1185	1207	76	1617	0	1	0	-1	0.719196	-1	FALSE
all	SARS1_A375_gRNA1586	A375	SARS1	GACCTCCATGTTCTGCAGCCTGT	ACAGGCTGCAGAACATGGAGGTC	ENST00000234677	GTGAAGCCTGCGCCCATTGAGCAGGAGCCATCAAAGAAGCAGAAGAAGCAACATGAGGGCAGCAAAAAGAAAGCAGCAGCAAGAGACGTCACCCTAGAAAACAGGCTGCAGAACATGGAGGTCACCGATGCTTGAACATTCCTGCCTCCCTATTTGCCAGGCTTTCATTTCTGTCTGCTGAGATCTCAGAGCCTGCCCAACAGCAGGGAAGCCAAGCACCCAT	aacccctaccaactggtcggggtttgaaac	-12.8	((((((.(((....))).)))))).............................	-42.8	0.452,0.31,1,1,0.818,0.457,0,0.024,0.126,0.004,0.077,0.053,0.174,0.056,0.375,0.473,0.448,0.35,0.404,0.478,0.01,0,0,0.058,0.305,0.231,0.478,0.206,0.453,0.378,0.304,0.354,0.981,1,0.576,0.873,1,1,0.282,0.406,0.48,0.728,1,0.806,0.955,1,0.955,0.632,0.708,0.932,0.583,0.658,0.807,0.311,0.46,0.336,0.161,0.286,0.187,0.237,0.162,0.112,0.137,0.163,0.362,0.412,0.412,0.263,0.164,0.388,0.662,0.537,0.064,0.139,…	0.070944,0.295480,0.827534,0.237559,0.275560,0.263396,0.168264,0.104675,0.592429,0.956264,0.344785,0.031786,0.261029,0.849909,0.957176,0.062163,0.046847,0.127229,0.195380,0.049907,0.413196,0.395298,0.008785,0.668384,0.979379,0.647464,0.088434,0.095650,0.044189,0.545516,0.755913,0.011854,0.254578,0.037816,0.811457,0.063602,0.020697,0.070669,0.001053,0.020577,0.000908,0.210973,0.258483,0.770492,0.2…	101	123	1486	1708	na	na	0	na	na	0.855832	0.131749	1586	1608	76	1617	0	1	0	-1	0.979248	-1	FALSE
all	ARCN1_A375_gRNA247	A375	ARCN1	GTAGACATATCTTACACTCTCTG	CAGAGAGTGTAAGATATGTCTAC	ENST00000264028	TCTCGACAGTTTGTGGAAATGACCCGAACTCGGATTGAGGGCTTATTAGCAGCTTTTCCAAAGCTCATGAACACTGGAAAACAACATACGTTTGTTGAAACAGAGAGTGTAAGATATGTCTACCAGCCTATGGAGAAACTGTATATGGTACTGATCACTACCAAAAACAGCAACATTTTAGAAGATTTGGAGACCCTAAGGCTCTTCTCAAGAGTGATCCCTG	aacccctaccaactggtcggggtttgaaac	-13	((((((.(((....))).))))))......(((((....)).)))........	-35.34	-1,-1,-1,-1,-1,-1,-1,-1,-1,-1,-1,-1,-1,-1,-1,-1,-1,-1,-1,-1,-1,-1,-1,-1,-1,-1,-1,-1,-1,-1,-1,-1,-1,-1,-1,0.219,0.546,-1,-1,-1,0,0.109,0.109,0.436,0.109,0.543,0.543,0.217,0.109,0.326,0.108,0,0,0.108,0,0,0.324,0.108,0,0.108,0.216,0.216,0.108,0,0,0.754,0.862,0.323,1,1,0.539,0.108,0,0.108,0.323,0.216,0.216,1,0.755,0.954,0.216,0.108,0.216,0.54,0.648,0.324,0.648,0,1,0.108,0.541,0.324,0.324,0,0.108,0.21…	0.470704,0.044497,0.080565,0.616503,0.632360,0.042322,0.216448,0.419080,0.140198,0.993834,0.757439,0.000006,0.245196,0.998827,0.783588,0.474236,0.067784,0.191468,0.074060,0.287679,0.812012,0.587013,0.294469,0.619201,0.110282,0.974739,0.557972,0.973379,0.938918,0.051470,0.037236,0.000104,0.000930,0.000260,0.063503,0.000027,0.008040,0.007740,0.000033,0.595220,0.001853,0.357186,0.094516,0.000127,0.5…	101	123	147	369	na	na	0	na	na	0.0639792	0.930039	247	269	96	1628	0	1	0	-1	0.0984997	-1	FALSE
all	ARCN1_A375_gRNA359	A375	ARCN1	CTCGGCAATATTCAGGGATCACT	AGTGATCCCTGAATATTGCCGAG	ENST00000264028	GATATGTCTACCAGCCTATGGAGAAACTGTATATGGTACTGATCACTACCAAAAACAGCAACATTTTAGAAGATTTGGAGACCCTAAGGCTCTTCTCAAGAGTGATCCCTGAATATTGCCGAGCCTTAGAAGAGAATGAAATATCTGAGCACTGTTTTGATTTGATTTTTGCTTTTGATGAAATTGTCGCACTGGGATACCGGGAGAATGTTAACTTGGCACA	aacccctaccaactggtcggggtttgaaac	-17.4	((((((.(((....))).))))))(((..(((.((......)))))..)))..	-40.32	0.64,0.747,0.32,0.958,0.638,0.958,0.851,0.638,0.319,0.956,0.425,0.213,0.319,0.318,0.318,0.425,0.212,0.849,0,0.212,0.954,0.318,0.848,1,1,0.953,0.106,0.318,0.74,0.317,0.529,0.317,0,0,0.106,0,0.106,0.106,0.105,0,0.211,0.738,0.316,0.316,0.421,0,0.21,0.421,0,0.525,0,0.21,0,0.105,0.419,0.105,0.524,0.21,0.418,0.209,0.314,0.314,0.209,0.313,0.209,0.939,0.626,0.522,1,1,1,0.208,1,0.73,0.938,0.417,0.938,1,0.…	0.069793,0.248289,0.326679,0.913312,0.932025,0.335412,0.118102,0.496094,0.058312,0.993949,0.812304,0.330103,0.553998,0.998930,0.932914,0.844450,0.803839,0.548776,0.920716,0.900253,0.848882,0.650210,0.557559,0.716488,0.749960,0.771223,0.526166,0.903876,0.969789,0.028811,0.978410,0.137179,0.002305,0.140344,0.116536,0.006713,0.122240,0.037559,0.001009,0.095853,0.016451,0.053697,0.512286,0.142360,0.8…	101	123	259	481	na	na	0	na	na	0.0931079	0.90091	359	381	96	1628	0	1	0	-1	0.171559	-1	FALSE
all	ARCN1_A375_gRNA360	A375	ARCN1	GCTCGGCAATATTCAGGGATCAC	GTGATCCCTGAATATTGCCGAGC	ENST00000264028	ATATGTCTACCAGCCTATGGAGAAACTGTATATGGTACTGATCACTACCAAAAACAGCAACATTTTAGAAGATTTGGAGACCCTAAGGCTCTTCTCAAGAGTGATCCCTGAATATTGCCGAGCCTTAGAAGAGAATGAAATATCTGAGCACTGTTTTGATTTGATTTTTGCTTTTGATGAAATTGTCGCACTGGGATACCGGGAGAATGTTAACTTGGCACAG	aacccctaccaactggtcggggtttgaaac	-13.6	((((((.(((....))).))))))(((..(.((.((......)))))..))).	-42.04	0.747,0.32,0.958,0.638,0.958,0.851,0.638,0.319,0.956,0.425,0.213,0.319,0.318,0.318,0.425,0.212,0.849,0,0.212,0.954,0.318,0.848,1,1,0.953,0.106,0.318,0.74,0.317,0.529,0.317,0,0,0.106,0,0.106,0.106,0.105,0,0.211,0.738,0.316,0.316,0.421,0,0.21,0.421,0,0.525,0,0.21,0,0.105,0.419,0.105,0.524,0.21,0.418,0.209,0.314,0.314,0.209,0.313,0.209,0.939,0.626,0.522,1,1,1,0.208,1,0.73,0.938,0.417,0.938,1,0.313,0…	0.053952,0.248624,0.180516,0.896616,0.919624,0.372573,0.163735,0.534815,0.047606,0.994299,0.826897,0.278023,0.602297,0.999213,0.939925,0.849804,0.776921,0.580325,0.931767,0.915078,0.844867,0.654390,0.579149,0.736222,0.727150,0.784336,0.512364,0.946319,0.984359,0.021233,0.978433,0.167646,0.002438,0.143663,0.137363,0.005552,0.113507,0.026487,0.001886,0.126368,0.011970,0.062302,0.512789,0.138159,0.7…	101	123	260	482	na	na	0	na	na	0.093368	0.90065	360	382	96	1628	0	1	0	-1	0.172211	-1	FALSE
all	ARCN1_A375_gRNA403	A375	ARCN1	AATCAAATCAAAACAGTGCTCAG	CTGAGCACTGTTTTGATTTGATT	ENST00000264028	ACTACCAAAAACAGCAACATTTTAGAAGATTTGGAGACCCTAAGGCTCTTCTCAAGAGTGATCCCTGAATATTGCCGAGCCTTAGAAGAGAATGAAATATCTGAGCACTGTTTTGATTTGATTTTTGCTTTTGATGAAATTGTCGCACTGGGATACCGGGAGAATGTTAACTTGGCACAGATCAGAACCTTCACAGAAATGGATTCTCATGAGGAGAAGGTGT	aacccctaccaactggtcggggtttgaaac	-13	.(((((.(((....))).)))))((((.....)))).................	-34.38	0.421,0,0.21,0.421,0,0.525,0,0.21,0,0.105,0.419,0.105,0.524,0.21,0.418,0.209,0.314,0.314,0.209,0.313,0.209,0.939,0.626,0.522,1,1,1,0.208,1,0.73,0.938,0.417,0.938,1,0.313,0.522,0.731,0.522,0.104,0.419,0.732,0.732,0.105,0.209,0.105,0,0,0.105,0,0.105,0.63,0.21,0.105,0.42,0.737,0.421,0.421,0,0,0.106,-1,-1,-1,-1,-1,-1,-1,0.556,0.556,1,1,0.889,0.579,1,0.116,0.347,0.463,0.118,0,0,0.236,0,0,0,0,0.358,0,0…	0.096735,0.414896,0.145890,0.768335,0.955228,0.334299,0.091401,0.417488,0.298903,0.940245,0.927312,0.030486,0.477509,0.994433,0.975180,0.407662,0.601803,0.577181,0.598883,0.351912,0.853672,0.507218,0.589432,0.779598,0.985641,0.948083,0.453872,0.907691,0.890403,0.075879,0.989955,0.071426,0.002174,0.090410,0.455581,0.008812,0.017761,0.015502,0.004041,0.579682,0.104869,0.050329,0.326282,0.285426,0.5…	101	123	303	525	na	na	0	na	na	0.104551	0.889467	403	425	96	1628	0	1	0	-1	0.200261	-1	FALSE
all	ARCN1_A375_gRNA950	A375	ARCN1	GTAATCCTCCGTCTCGTCCACAG	CTGTGGACGAGACGGAGGATTAC	ENST00000264028	CTAGTATGGGCAAGCGTACTTCTGAAGCAACCAAAATGCATGCTCCACCCATTAATATGGAAAGTGTACATATGAAGATTGAAGAAAAGATAACATTAACCTGTGGACGAGACGGAGGATTACAGAATATGGAGTTGCATGGCATGATCATGCTTAGGATCTCAGATGACAAGTATGGCCGAATTCGTCTTCATGTGGAAAATGAAGATAAGAAAGGGGTGCA	aacccctaccaactggtcggggtttgaaac	-14.9	((((((.(((....))).)))))).((.(((........))).))........	-42.47	0.376,0.375,1,0.281,0.562,0.562,0.281,0,0.187,0,0.094,1,0.653,0.093,0.187,0.56,0.372,0.186,0.372,0.372,0.093,0.093,0.371,0.093,0.743,0.557,0.278,0.185,0.648,0,0.37,0,0.462,0.277,0.277,0.369,0.184,0.184,0.368,0.276,0.368,0,0.275,0.092,0.092,0.183,0,0.091,0,0.274,0,0.182,0.636,1,1,0.545,0.273,0.273,0.091,0.273,0.727,0,0,0,-1,-1,-1,-1,-1,-1,-1,-1,-1,-1,-1,-1,-1,-1,-1,-1,-1,-1,-1,-1,-1,-1,-1,-1,-1,-1…	0.730976,0.039545,0.490835,0.857596,0.592896,0.311005,0.459250,0.612763,0.927471,0.986850,0.413138,0.012696,0.276477,0.998061,0.986248,0.726751,0.303657,0.240858,0.695569,0.834572,0.610082,0.926439,0.299645,0.744762,0.888735,0.967575,0.200448,0.765179,0.875220,0.335089,0.504603,0.634781,0.027500,0.029068,0.255133,0.083275,0.129008,0.305540,0.361755,0.015840,0.025516,0.010392,0.346363,0.648555,0.5…	101	123	850	1072	na	na	0	na	na	0.246814	0.747204	950	972	96	1628	0	1	0	-1	0.557078	-1	FALSE
all	ARCN1_A375_gRNA1194	A375	ARCN1	ATAAAAGATTCCTCTGTGGTTTG	CAAACCACAGAGGAATCTTTTAT	ENST00000264028	GGATAAAAAACTTTTCACTGCAGAGTCTCTAATTGGCCTGAAGAATCCAGAGAAGTCATTTCCAGTCAACAGTGACGTAGGGGTGCTAAAGTGGAGACTACAAACCACAGAGGAATCTTTTATTCCACTGACAATTAATTGCTGGCCCTCGGAGAGTGGAAATGGCTGTGATGTCAACATAGAATATGAGCTACAAGAAGATAATTTAGAACTGAATGATGTG	aacccctaccaactggtcggggtttgaaac	-14.3	((((((.(((....))).))))))..((((.....(((....)))...)))).	-32.73	0.266,0.266,0,0.266,0.711,0.178,0.889,0.889,0.444,0,0.178,0.712,0.445,0.445,0.624,0.357,0.624,0.089,0.535,0.268,0.357,0.178,0.178,0.803,0.357,0.357,0,0.089,0.089,0.268,0.626,0.536,0.358,0.447,0.358,0.179,0.089,0.268,0.089,1,0.983,0.268,0.894,1,1,0.894,0.358,0.894,0.894,1,1,1,1,0.715,0.805,0,0,0.179,0.983,0.715,0.447,0.179,0.626,0.805,0.536,0.358,0.358,0.894,0.536,0.715,1,0.447,0.805,0.268,0.089,0…	0.705879,0.332246,0.251914,0.917641,0.979963,0.447125,0.108085,0.779567,0.958651,0.866261,0.863943,0.031271,0.184898,0.960054,0.826006,0.923371,0.218540,0.661927,0.263445,0.451104,0.946039,0.981597,0.810172,0.720719,0.932348,0.980725,0.646100,0.783864,0.634364,0.044881,0.902538,0.057127,0.539122,0.270493,0.719351,0.073005,0.035443,0.214617,0.312084,0.648085,0.017981,0.672276,0.004491,0.042778,0.8…	101	123	1094	1316	na	na	0	na	na	0.310273	0.683745	1194	1216	96	1628	0	1	0	-1	0.716243	-1	FALSE
all	CKAP5_A375_gRNA1892	A375	CKAP5	ACTCTTCCATACAAGCCAGCCTT	AAGGCTGGCTTGTATGGAAGAGT	ENST00000529230	TAGTGGAGCCTGAGCTCTCGATAGAAGTATGTGAAGAAAAAGCTTCAGCTGTTCTTCCCCCTACCTGTATACAGCTTCTTGACAGCAGTAACTGGAAAGAAAGGCTGGCTTGTATGGAAGAGTTCCAGAAGGCTGTTGAGCTAATGGACCGAACTGAAATGCCATGCCAGGCATTAGTGAGGATGCTAGCCAAGAAACCTGGATGGAAAGAAACTAATTTTCA	aacccctaccaactggtcggggtttgaaac	-12.8	((((((.(((....))).)))))).............................	-40.84	-1,-1,-1,-1,-1,-1,-1,-1,-1,-1,-1,-1,-1,-1,-1,-1,-1,-1,-1,-1,-1,-1,-1,-1,-1,-1,-1,-1,-1,-1,-1,-1,-1,-1,-1,-1,-1,-1,-1,-1,-1,-1,-1,-1,-1,-1,-1,-1,-1,-1,-1,-1,-1,-1,-1,-1,-1,-1,-1,-1,-1,-1,-1,-1,-1,-1,-1,-1,-1,-1,-1,-1,-1,-1,-1,-1,-1,-1,-1,-1,-1,-1,-1,-1,-1,-1,-1,-1,-1,-1,-1,-1,-1,-1,-1,-1,-1,-1,-1,-1,-1,-1,-1,-1,-1,-1,-1,-1,-1,-1,-1,-1,-1,-1,-1,-1,-1,-1,-1,-1,-1,-1,-1,-1,-1,-1,-1,-1,-1,-1,-1,-1,-1,…	0.936192,0.237621,0.665589,0.548100,0.364704,0.566583,0.295421,0.777639,0.892335,0.686905,0.085477,0.860420,0.020204,0.974747,0.069991,0.000106,0.228690,0.399983,0.790300,0.787696,0.878257,0.937448,0.494559,0.944631,0.646392,0.762073,0.162503,0.847852,0.776639,0.519372,0.123269,0.410737,0.586047,0.149471,0.796079,0.068720,0.443399,0.671828,0.775237,0.000436,0.656094,0.003250,0.440633,0.166643,0.6…	101	123	1792	2014	na	na	0	na	na	0.265553	0.731218	1892	1914	48	6143	0	1	0	-1	0.302493	-1	FALSE
all	CKAP5_A375_gRNA3073	A375	CKAP5	AAGGTCTGTAGGGGTGGAACGAA	TTCGTTCCACCCCTACAGACCTT	ENST00000529230	GAATGGCTGGAAGGAGAAGATCTTTCTGAAGAGCTCAAAAAGGAAAATCCTTTCTTGAGGCAAGAGCTTCTGGGCTGGCTGGCTGAGAAACTACCTACTCTTCGTTCCACCCCTACAGACCTTATCCTTTGTGTTCCTCATCTCTACTCCTGCCTAGAAGATCGAAATGGAGATGTGCGAAAGAAGGCCCAAGATGCCTTGCCATTCTTCATGATGCATTTAG	aacccctaccaactggtcggggtttgaaac	-16.1	.((((((((..(((..(((.....))).....)))..))))))))........	-43.16	-1,-1,-1,-1,-1,-1,-1,-1,-1,-1,-1,-1,-1,-1,-1,-1,-1,-1,-1,-1,-1,-1,-1,-1,-1,-1,-1,-1,-1,-1,-1,-1,-1,-1,-1,-1,-1,-1,0.245,-1,0.123,0,0.245,0.852,1,1,1,0.363,0.121,0,0.241,0.362,0.241,0.603,0.603,0.361,0.843,0.482,0.482,0.944,1,0.942,1,0,0,0,-1,-1,-1,-1,-1,-1,-1,-1,-1,-1,-1,-1,-1,-1,-1,-1,-1,-1,-1,-1,-1,-1,-1,-1,-1,-1,-1,-1,-1,-1,-1,-1,-1,-1,-1,-1,-1,-1,-1,-1,-1,-1,-1,-1,-1,-1,-1,-1,-1,-1,-1,-1,-1,-…	0.507142,0.537730,0.675651,0.180945,0.563845,0.657889,0.361851,0.778325,0.851258,0.706442,0.139311,0.762000,0.035182,0.913064,0.092883,0.000280,0.023093,0.603158,0.609696,0.928039,0.895056,0.999188,0.420510,0.966083,0.240237,0.074606,0.449640,0.974448,0.939065,0.150052,0.145681,0.553886,0.902615,0.148455,0.811875,0.038295,0.296322,0.141401,0.859505,0.000485,0.374181,0.416822,0.264987,0.008194,0.4…	101	123	2973	3195	na	na	0	na	na	0.4314	0.56537	3073	3095	48	6143	0	1	0	-1	0.496227	-1	FALSE
all	CKAP5_A375_gRNA4866	A375	CKAP5	TACAACTTGATGATCTCGTCCTT	AAGGACGAGATCATCAAGTTGTA	ENST00000529230	AGCTGAAGCCATGTCCGGCCATATTGATCAGTTTCTGATAGCCACTTTTATGCAGCTAAGACTCATCTACAACACACACATGGCAGATGAGAAATTGGAGAAGGACGAGATCATCAAGTTGTATAGCTGTATCATTGGCAACATGATTTCGCTGTTTCAGATAGAGAGCCTTGCCCGGGAGGCCTCCACTGGAGTACTAAAAGACCTAATGCATGGCCTCATC	aacccctaccaactggtcggggtttgaaac	-14.7	((((((.(((....))).))))))..............((((....))))...	-34.34	0.292,0.486,0.389,0.681,0.778,1,1,0.487,0.098,0.293,0.489,0.293,0.293,0.197,0.098,0.098,0.295,0.098,0.099,0.296,0.197,0.197,0.493,0.099,0.495,0.396,0.297,0.198,0.298,0.796,0,0.199,0.696,0.499,0.2,0.399,0.799,1,1,1,0.601,0,0.1,0,0.303,0.504,0.904,0.807,0.98,1,0.98,0,0,0,0,0.204,0.51,0.98,1,0.907,0.612,0.204,0.204,0.408,0.204,0.102,0.408,0.612,0.306,0.51,0.204,0.102,0.204,0.306,0.51,0.612,0.408,0.3…	0.108628,0.105200,0.144821,0.192923,0.526823,0.032157,0.082378,0.433638,0.569378,0.891061,0.077370,0.036380,0.015510,0.922740,0.090741,0.465054,0.411210,0.068985,0.710376,0.203726,0.793312,0.720672,0.069884,0.413327,0.751399,0.924651,0.375404,0.819852,0.187708,0.557619,0.650359,0.153694,0.048893,0.001536,0.435623,0.003177,0.006633,0.061325,0.012504,0.076900,0.002618,0.106518,0.205762,0.009491,0.6…	101	123	4766	4988	na	na	0	na	na	0.683191	0.31358	4866	4888	48	6143	0	1	0	-1	0.790354	-1	FALSE
all	CKAP5_A375_gRNA5748	A375	CKAP5	TCCATCTGAGGGGAGATGCCTGT	ACAGGCATCTCCCCTCAGATGGA	ENST00000529230	ATTTCTGAAAAATTCCTCACAGTTCTTCCAGAGCTATGTCGAAAGAGGCCTTCGGGTGATTGAGATGGAGAGGGAGGGCAAAGGTCGTATTTCCACTTCAACAGGCATCTCCCCTCAGATGGAAGTCACATGTGTGCCCACGCCCACAAGCACAGTGTCCTCCATAGGTAACACAAATGGGGAAGAAGTGGGGCCATCTGTCTACTTGGAAAGGCTAAAGATC	aacccctaccaactggtcggggtttgaaac	-17.6	((((((.(((....))).)))))).....((((........))))........	-39.51	-1,-1,-1,-1,-1,-1,0.327,0.163,0,0.49,0.979,1,1,0,0.163,0,0.163,0.325,0,0.325,0,0,0.486,0,0,0.648,0.162,0.161,0.646,0.969,0.323,0,-1,0.482,0.804,0,0.161,0.16,0.16,0.479,0.799,1,0.975,0.95,0.792,0.95,0.317,0,0,0,0.625,0,0,0.306,0.306,0.306,0.958,0.875,1,1,0.729,1,-1,-1,-1,-1,-1,-1,-1,-1,-1,-1,-1,-1,-1,-1,-1,-1,-1,-1,-1,-1,-1,-1,-1,-1,-1,-1,-1,-1,-1,-1,-1,-1,-1,-1,-1,-1,-1,-1,-1,-1,-1,-1,0.789,1,1,0…	0.758870,0.901194,0.557164,0.088241,0.098522,0.441689,0.084923,0.066122,0.242158,0.967084,0.108726,0.118102,0.067036,0.618138,0.374868,0.192825,0.005163,0.069018,0.115776,0.006539,0.537953,0.817479,0.093965,0.591675,0.106313,0.028953,0.528896,0.011258,0.353134,0.064656,0.176583,0.008392,0.645537,0.077944,0.276544,0.029757,0.025593,0.119949,0.017452,0.548166,0.244396,0.043336,0.003035,0.125808,0.8…	101	123	5648	5870	na	na	0	na	na	0.80705	0.189721	5748	5770	48	6143	0	1	0	-1	0.935039	-1	FALSE
all	CKAP5_A375_gRNA6087	A375	CKAP5	TTCAAGTCGTCTATGTTAGCTGT	ACAGCTAACATAGACGACTTGAA	ENST00000529230	CAAACTCTCTCAGCTCCGGGAGTCACGGGAGCAGCACCAGCATTCAGACCTGGATTCTAACCAGACTCACTCTTCAGGAACTGTGACCTCCTCCTCCTCCACAGCTAACATAGACGACTTGAAAAAAAGACTGGAGAGAATAAAGAGCAGTCGCAAATGAAGCTGCCCCACTCCCCCGGCACCCTGCAGCTTTAGTTTACTAAACTAGAAGTCCTCATAGTTT	aacccctaccaactggtcggggtttgaaac	-13.3	.(((((.(((....))).)))))((((....))))..................	-37.18	0.89,1,1,0.238,0.397,0.397,0.079,0,0.158,0.158,0.475,0.791,0.317,0.709,0.315,0.079,0.079,0,0.078,0,0.312,0.546,0.078,0.231,0.154,0.077,0.154,0.077,0.153,0.153,0.076,0.153,0.763,0.302,0.377,0.377,0.075,0.226,0.149,0,0.075,0.672,0.299,0.148,0.443,0.443,0.591,0.853,0.073,0,0.073,0.146,0.51,0.504,0.288,0.504,0.432,0.962,1,1,0.285,0.285,0.356,0.706,0.353,0.353,0.494,0.424,0.628,0.349,0.14,0.14,0.419,0…	0.461553,0.038585,0.779615,0.262069,0.538107,0.463650,0.089359,0.298649,0.049808,0.997232,0.732308,0.000089,0.114626,0.912347,0.968823,0.277020,0.097025,0.516336,0.453366,0.114456,0.658074,0.734202,0.096588,0.887190,0.974449,0.856773,0.587155,0.727120,0.192014,0.978745,0.074795,0.007966,0.325697,0.145912,0.717901,0.033501,0.142858,0.048731,0.000278,0.014434,0.001247,0.326092,0.021685,0.000546,0.8…	101	123	5987	6209	na	na	0	na	na	0.854655	0.142115	6087	6109	48	6143	0	1	0	-1	0.99065	-1	FALSE
all	CKAP5_A375_gRNA6131	A375	CKAP5	GGCAGCTTCATTTGCGACTGCTC	GAGCAGTCGCAAATGAAGCTGCC	ENST00000529230	CAGACCTGGATTCTAACCAGACTCACTCTTCAGGAACTGTGACCTCCTCCTCCTCCACAGCTAACATAGACGACTTGAAAAAAAGACTGGAGAGAATAAAGAGCAGTCGCAAATGAAGCTGCCCCACTCCCCCGGCACCCTGCAGCTTTAGTTTACTAAACTAGAAGTCCTCATAGTTTAAAATGGCCTCAGCAGGCCTAGTGTATACAAACTGGTTGTATGT	aacccctaccaactggtcggggtttgaaac	-17.8	((((((.(((....))).))))))......(((((..((......))))))).	-33.48	0.443,0.443,0.591,0.853,0.073,0,0.073,0.146,0.51,0.504,0.288,0.504,0.432,0.962,1,1,0.285,0.285,0.356,0.706,0.353,0.353,0.494,0.424,0.628,0.349,0.14,0.14,0.419,0.207,0.207,0.069,0,0.207,0.341,0.136,0.068,0.205,0,0,0.337,0.067,0.135,0.27,0,0,0,0,0,0,0,0.132,0,0.066,0.065,0.065,0.195,0.13,0.13,0.064,0.064,0.578,0.882,0.385,0.572,0.318,0.763,0.7,0.7,0.126,0.126,0.567,0.504,0.378,0.499,0.437,0.749,0.2…	0.182339,0.019129,0.275532,0.300293,0.289744,0.487797,0.612832,0.228418,0.688061,0.973110,0.983531,0.005177,0.800563,0.979402,0.446286,0.508746,0.019474,0.661149,0.715371,0.489744,0.474221,0.569441,0.078527,0.579541,0.999574,0.940300,0.970557,0.118679,0.585579,0.109957,0.079430,0.056767,0.602203,0.249813,0.208164,0.062558,0.510561,0.396172,0.005851,0.004927,0.019272,0.117850,0.088095,0.107270,0.5…	101	123	6031	6253	na	na	0	na	na	0.860834	0.135936	6131	6153	48	6143	0	1	0	-1	0.997867	-1	FALSE
all	GARS1_A375_gRNA1265	A375	GARS1	GCCATTGTGAATTCTCTGACTCT	AGAGTCAGAGAATTCACAATGGC	ENST00000389266	CAAACGACTTTTGGAGTTCAACCAAGGAAAGTTGCCTTTTGCTGCTGCCCAGATTGGAAATTCTTTTAGAAATGAGATCTCCCCTCGATCTGGACTGATCAGAGTCAGAGAATTCACAATGGCAGAAATTGAGCACTTTGTAGATCCCAGTGAGAAAGACCACCCCAAGTTCCAGAATGTGGCAGACCTTCACCTTTATTTGTATTCAGCAAAAGCCCAGGTC	aacccctaccaactggtcggggtttgaaac	-13.4	((((((.(((....))).)))))).(((.(((....)))..))).........	-37.99	0,0.068,0.204,0.068,0.271,1,0.954,0.409,0.886,0.204,0.204,0.068,0,0.136,0.273,0.204,0.204,0.341,0.477,0.273,0.545,0.273,0.273,0.681,0.341,0.204,0.409,0.204,0.409,0.136,0.068,0.136,0.068,0.341,0.136,0.068,0.204,0.341,0,0.136,0.136,0.341,0.204,0,0.068,0.273,0.068,0.068,0.136,0.204,0.341,0.341,0.204,0.068,0.068,0.068,0,0.204,0.136,0.204,0,0,0.341,0.273,0.204,0.136,0.681,0.477,0.341,1,0.409,-1,-1,-1,…	0.593765,0.313754,0.708491,0.670736,0.904715,0.889380,0.311269,0.429248,0.299904,0.979677,0.542842,0.006117,0.429668,0.989224,0.558860,0.326941,0.655376,0.568210,0.854791,0.221062,0.781346,0.837099,0.726481,0.929952,0.542473,0.855152,0.349831,0.277617,0.402455,0.179543,0.080220,0.054730,0.255892,0.069578,0.265495,0.000249,0.076919,0.030326,0.007972,0.382894,0.012152,0.129229,0.701641,0.331655,0.8…	101	123	1165	1387	na	na	0	na	na	0.479879	0.51139	1265	1287	242	2458	0	1	0	-1	0.461434	-1	FALSE
all	GARS1_A375_gRNA1281	A375	GARS1	AAAGTGCTCAATTTCTGCCATTG	CAATGGCAGAAATTGAGCACTTT	ENST00000389266	TTCAACCAAGGAAAGTTGCCTTTTGCTGCTGCCCAGATTGGAAATTCTTTTAGAAATGAGATCTCCCCTCGATCTGGACTGATCAGAGTCAGAGAATTCACAATGGCAGAAATTGAGCACTTTGTAGATCCCAGTGAGAAAGACCACCCCAAGTTCCAGAATGTGGCAGACCTTCACCTTTATTTGTATTCAGCAAAAGCCCAGGTCAGCGGACAGTCCGCTC	aacccctaccaactggtcggggtttgaaac	-13.7	((((((.(((....))).)))))).....(((.(.((.........))).)))	-34.59	0.204,0.341,0.477,0.273,0.545,0.273,0.273,0.681,0.341,0.204,0.409,0.204,0.409,0.136,0.068,0.136,0.068,0.341,0.136,0.068,0.204,0.341,0,0.136,0.136,0.341,0.204,0,0.068,0.273,0.068,0.068,0.136,0.204,0.341,0.341,0.204,0.068,0.068,0.068,0,0.204,0.136,0.204,0,0,0.341,0.273,0.204,0.136,0.681,0.477,0.341,1,0.409,-1,-1,-1,-1,-1,-1,-1,-1,-1,-1,-1,-1,-1,-1,-1,-1,-1,-1,-1,-1,-1,-1,-1,-1,-1,-1,-1,-1,-1,-1,-1,…	0.694447,0.186568,0.602634,0.260820,0.830146,0.773258,0.372728,0.176825,0.118112,0.978135,0.389401,0.009390,0.427609,0.992782,0.685653,0.215129,0.452253,0.508895,0.642922,0.066680,0.802701,0.599017,0.695232,0.908272,0.892056,0.966651,0.211547,0.393733,0.266620,0.284569,0.247933,0.291042,0.342747,0.019954,0.488041,0.000569,0.193137,0.091081,0.005249,0.790681,0.017687,0.015873,0.784383,0.806882,0.9…	101	123	1181	1403	na	na	0	na	na	0.485953	0.505315	1281	1303	242	2458	0	1	0	-1	0.468651	-1	FALSE
all	GARS1_A375_gRNA1283	A375	GARS1	ACAAAGTGCTCAATTTCTGCCAT	ATGGCAGAAATTGAGCACTTTGT	ENST00000389266	CAACCAAGGAAAGTTGCCTTTTGCTGCTGCCCAGATTGGAAATTCTTTTAGAAATGAGATCTCCCCTCGATCTGGACTGATCAGAGTCAGAGAATTCACAATGGCAGAAATTGAGCACTTTGTAGATCCCAGTGAGAAAGACCACCCCAAGTTCCAGAATGTGGCAGACCTTCACCTTTATTTGTATTCAGCAAAAGCCCAGGTCAGCGGACAGTCCGCTCGG	aacccctaccaactggtcggggtttgaaac	-14.1	.(((((.(((....))).)))))((((..(((...))).))))..........	-35.81	0.477,0.273,0.545,0.273,0.273,0.681,0.341,0.204,0.409,0.204,0.409,0.136,0.068,0.136,0.068,0.341,0.136,0.068,0.204,0.341,0,0.136,0.136,0.341,0.204,0,0.068,0.273,0.068,0.068,0.136,0.204,0.341,0.341,0.204,0.068,0.068,0.068,0,0.204,0.136,0.204,0,0,0.341,0.273,0.204,0.136,0.681,0.477,0.341,1,0.409,-1,-1,-1,-1,-1,-1,-1,-1,-1,-1,-1,-1,-1,-1,-1,-1,-1,-1,-1,-1,-1,-1,-1,-1,-1,-1,-1,-1,-1,-1,-1,-1,-1,-1,-1,…	0.729549,0.225633,0.700007,0.142832,0.814650,0.599528,0.330265,0.204216,0.180562,0.966593,0.598313,0.009686,0.606975,0.995692,0.709990,0.342574,0.544968,0.366132,0.691482,0.052608,0.801724,0.521807,0.700100,0.937841,0.872093,0.976647,0.264346,0.471533,0.191915,0.210134,0.241418,0.378205,0.468823,0.017615,0.580194,0.000243,0.268008,0.147821,0.003276,0.881350,0.044602,0.017398,0.631232,0.647824,0.8…	101	123	1183	1405	na	na	0	na	na	0.486712	0.504556	1283	1305	242	2458	0	1	0	-1	0.469553	-1	FALSE
all	GARS1_A375_gRNA1293	A375	GARS1	ACTGGGATCTACAAAGTGCTCAA	TTGAGCACTTTGTAGATCCCAGT	ENST00000389266	AAGTTGCCTTTTGCTGCTGCCCAGATTGGAAATTCTTTTAGAAATGAGATCTCCCCTCGATCTGGACTGATCAGAGTCAGAGAATTCACAATGGCAGAAATTGAGCACTTTGTAGATCCCAGTGAGAAAGACCACCCCAAGTTCCAGAATGTGGCAGACCTTCACCTTTATTTGTATTCAGCAAAAGCCCAGGTCAGCGGACAGTCCGCTCGGAAAATGCGCC	aacccctaccaactggtcggggtttgaaac	-16.9	((((((.(((....))).))))))........((((..((....))..)))).	-35.89	0.409,0.136,0.068,0.136,0.068,0.341,0.136,0.068,0.204,0.341,0,0.136,0.136,0.341,0.204,0,0.068,0.273,0.068,0.068,0.136,0.204,0.341,0.341,0.204,0.068,0.068,0.068,0,0.204,0.136,0.204,0,0,0.341,0.273,0.204,0.136,0.681,0.477,0.341,1,0.409,-1,-1,-1,-1,-1,-1,-1,-1,-1,-1,-1,-1,-1,-1,-1,-1,-1,-1,-1,-1,-1,-1,-1,-1,-1,-1,-1,-1,-1,-1,-1,-1,-1,-1,-1,-1,-1,0.28,0,1,0.77,0.7,1,1,0.768,0.956,1,0.631,0.561,0.912,…	0.504351,0.167066,0.609822,0.069882,0.819563,0.390141,0.220238,0.130221,0.099660,0.993334,0.512932,0.004127,0.626221,0.993654,0.890857,0.369992,0.485342,0.344427,0.825109,0.068129,0.719196,0.424183,0.542301,0.876002,0.954633,0.963685,0.440811,0.363865,0.272070,0.352472,0.194468,0.297236,0.440047,0.009048,0.182711,0.000181,0.128819,0.079957,0.001818,0.573155,0.026211,0.035852,0.872887,0.515091,0.8…	101	123	1193	1415	na	na	0	na	na	0.490509	0.500759	1293	1315	242	2458	0	1	0	-1	0.474064	-1	FALSE
all	GARS1_A375_gRNA1341	A375	GARS1	ATAAAGGTGAAGGTCTGCCACAT	ATGTGGCAGACCTTCACCTTTAT	ENST00000389266	ATCTCCCCTCGATCTGGACTGATCAGAGTCAGAGAATTCACAATGGCAGAAATTGAGCACTTTGTAGATCCCAGTGAGAAAGACCACCCCAAGTTCCAGAATGTGGCAGACCTTCACCTTTATTTGTATTCAGCAAAAGCCCAGGTCAGCGGACAGTCCGCTCGGAAAATGCGCCTGGGAGATGCTGTTGAACAGGGTGTGATTAATAACACAGTATTAGGCT	aacccctaccaactggtcggggtttgaaac	-14.9	((((((.(((....))).))))))...........(((........)))....	-36.39	-1,-1,-1,-1,-1,-1,-1,-1,-1,-1,-1,-1,-1,-1,-1,-1,-1,-1,-1,-1,-1,-1,-1,-1,-1,-1,-1,-1,-1,-1,-1,-1,0.28,0,1,0.77,0.7,1,1,0.768,0.956,1,0.631,0.561,0.912,0.14,0.912,0.282,0.282,0.352,1,0.704,0.852,0.284,1,1,0.568,0.359,0.215,0.359,0.646,0.502,0.722,0.722,0.863,0.578,0.506,0.437,0.51,0.292,0.073,0,0.294,0.441,0.294,0.873,0.809,0.519,0.445,1,0.371,0.667,0.224,0.075,0.149,0.075,0.075,0,0,0.15,0.226,0.52…	0.083852,0.064884,0.332747,0.014155,0.726214,0.200411,0.042368,0.023842,0.031458,0.974374,0.441675,0.000595,0.387175,0.568264,0.283279,0.062075,0.002747,0.177497,0.063178,0.038029,0.646479,0.593880,0.118917,0.783791,0.002618,0.566209,0.151081,0.120124,0.225355,0.109868,0.058776,0.007722,0.856369,0.012365,0.184304,0.000266,0.476847,0.015695,0.015627,0.456592,0.001223,0.013590,0.205180,0.008491,0.8…	101	123	1241	1463	na	na	0	na	na	0.508732	0.482536	1341	1363	242	2458	0	1	0	-1	0.495715	-1	FALSE
all	GARS1_A375_gRNA1342	A375	GARS1	AATAAAGGTGAAGGTCTGCCACA	TGTGGCAGACCTTCACCTTTATT	ENST00000389266	TCTCCCCTCGATCTGGACTGATCAGAGTCAGAGAATTCACAATGGCAGAAATTGAGCACTTTGTAGATCCCAGTGAGAAAGACCACCCCAAGTTCCAGAATGTGGCAGACCTTCACCTTTATTTGTATTCAGCAAAAGCCCAGGTCAGCGGACAGTCCGCTCGGAAAATGCGCCTGGGAGATGCTGTTGAACAGGGTGTGATTAATAACACAGTATTAGGCTA	aacccctaccaactggtcggggtttgaaac	-14.9	((((((.(((....))).))))))............(((........)))...	-36.22	-1,-1,-1,-1,-1,-1,-1,-1,-1,-1,-1,-1,-1,-1,-1,-1,-1,-1,-1,-1,-1,-1,-1,-1,-1,-1,-1,-1,-1,-1,-1,0.28,0,1,0.77,0.7,1,1,0.768,0.956,1,0.631,0.561,0.912,0.14,0.912,0.282,0.282,0.352,1,0.704,0.852,0.284,1,1,0.568,0.359,0.215,0.359,0.646,0.502,0.722,0.722,0.863,0.578,0.506,0.437,0.51,0.292,0.073,0,0.294,0.441,0.294,0.873,0.809,0.519,0.445,1,0.371,0.667,0.224,0.075,0.149,0.075,0.075,0,0,0.15,0.226,0.527,0…	0.176886,0.060950,0.260954,0.004504,0.684361,0.225161,0.054397,0.021393,0.023202,0.960900,0.608365,0.000473,0.545484,0.500255,0.442487,0.051170,0.003104,0.311353,0.058014,0.027303,0.600212,0.576159,0.083890,0.719371,0.000735,0.470390,0.151796,0.127625,0.288845,0.089606,0.013035,0.008308,0.837360,0.012268,0.143306,0.000192,0.304565,0.014664,0.016572,0.452627,0.001585,0.016200,0.176414,0.015236,0.8…	101	123	1242	1464	na	na	0	na	na	0.509112	0.482156	1342	1364	242	2458	0	1	0	-1	0.496166	-1	FALSE
all	CIAO3_A375_gRNA260	A375	CIAO3	GCTGGGTGATAAGCACGGTCTCT	AGAGACCGTGCTTATCACCCAGC	ENST00000251588	GCTACTTCCAAATTAACCAAGACGGCGGGACCCGGAGGCTGGAGAAGGCCAAGGTCTCGCTAAACGACTGCCTGGCGTGCAGCGGCTGCATCACCTCCGCAGAGACCGTGCTTATCACCCAGCAGAGCCACGAGGAGCTGAAGAAGGTTCTAGATGCTAACAAGATGGCGGCACCCAGTCAGCAGAGGCTGGTTGTAGTTTCGGTCTCACCACAGTCTAGAGC	aacccctaccaactggtcggggtttgaaac	-16.1	((((((.(((....))).))))))......((((.((.....)).))))....	-41.54	-1,-1,-1,-1,-1,-1,-1,-1,-1,-1,-1,-1,-1,-1,-1,-1,-1,-1,-1,-1,-1,-1,-1,-1,-1,-1,-1,-1,-1,-1,-1,-1,-1,-1,-1,-1,-1,-1,-1,-1,-1,-1,-1,-1,-1,-1,-1,-1,-1,-1,-1,-1,-1,-1,-1,0,0.095,0.095,0.19,0.19,0.569,1,1,0.854,0.664,1,0.664,0,0.38,0.38,0,0.19,0,0.569,0.664,0.759,0.285,0.569,0.19,0.38,0.19,0.19,0.285,0,0.285,0.19,0.569,0.19,0.38,1,0.759,0.569,0.994,0.38,0.285,0.19,0.095,0.569,0.095,0.759,0.759,0,0,0.28…	0.016893,0.233494,0.128217,0.156711,0.023818,0.050544,0.005332,0.010268,0.000347,0.756193,0.034435,0.032127,0.319433,0.833203,0.738962,0.076139,0.006371,0.000982,0.037974,0.022351,0.093449,0.271497,0.033507,0.217643,0.363802,0.403595,0.035260,0.051205,0.037208,0.173194,0.751843,0.064622,0.086960,0.006582,0.000152,0.004798,0.000330,0.010788,0.005105,0.336433,0.066740,0.174031,0.005888,0.003765,0.3…	101	123	160	382	na	na	0	na	na	0.122633	0.866477	260	282	18	1445	0	1	0	-1	0.169468	-1	FALSE
all	CIAO3_A375_gRNA392	A375	CIAO3	TAGGATTCAGCTGAAACCGTGCA	TGCACGGTTTCAGCTGAATCCTA	ENST00000251588	AGGAGCTGAAGAAGGTTCTAGATGCTAACAAGATGGCGGCACCCAGTCAGCAGAGGCTGGTTGTAGTTTCGGTCTCACCACAGTCTAGAGCATCGCTGGCTGCACGGTTTCAGCTGAATCCTACAGATACTGCCAGGAAATTAACCTCATTCTTTAAAAAAATAGGGGTGCACTTCGTCTTCGACACCGCCTTCTCAAGGCACTTCAGCCTCCTGGAGAGCCA	aacccctaccaactggtcggggtttgaaac	-15.7	((((((.(((....))).)))))).....(..((.(((....))).))..)..	-35.98	0.094,0.094,0.47,0.561,0.094,0,0.655,0.655,0.929,0.464,0.992,0.464,0.279,0.737,0.645,0.184,0.368,0.092,0.273,0.364,0.455,0.182,0.091,0.09,0.09,0.269,1,0.539,0.538,0.179,0.09,0,-1,-1,-1,-1,-1,-1,-1,-1,-1,-1,-1,-1,-1,-1,-1,-1,-1,-1,-1,-1,-1,-1,-1,-1,-1,-1,-1,-1,-1,-1,-1,-1,-1,-1,-1,1,0,0.125,0,0.5,0.5,0.125,0.625,0.875,0.625,0.5,1,0,1,1,1,0.5,0.75,1,1,0.5,1,0.625,0.625,0.75,0.375,1,0.625,0,0.125,0.…	0.051440,0.096845,0.011614,0.352249,0.866711,0.085654,0.116043,0.495988,0.028495,0.672193,0.746421,0.002118,0.283426,0.851082,0.317044,0.199891,0.087469,0.062261,0.167481,0.556515,0.817813,0.951109,0.512149,0.941510,0.090722,0.205106,0.191452,0.888306,0.616985,0.001846,0.988402,0.020751,0.056520,0.015020,0.001510,0.003771,0.005061,0.052845,0.003375,0.445444,0.165562,0.442525,0.362359,0.287467,0.7…	101	123	292	514	na	na	0	na	na	0.185133	0.803977	392	414	18	1445	0	1	0	-1	0.261905	-1	FALSE
all	CIAO3_A375_gRNA417	A375	CIAO3	GAGGTTAATTTCCTGGCAGTATC	GATACTGCCAGGAAATTAACCTC	ENST00000251588	TAACAAGATGGCGGCACCCAGTCAGCAGAGGCTGGTTGTAGTTTCGGTCTCACCACAGTCTAGAGCATCGCTGGCTGCACGGTTTCAGCTGAATCCTACAGATACTGCCAGGAAATTAACCTCATTCTTTAAAAAAATAGGGGTGCACTTCGTCTTCGACACCGCCTTCTCAAGGCACTTCAGCCTCCTGGAGAGCCAGCGAGAGTTTGTGCGGCGATTCCGA	aacccctaccaactggtcggggtttgaaac	-16.3	((((((.(((....))).)))))).....(.(((.......))).).......	-36.9	0.269,1,0.539,0.538,0.179,0.09,0,-1,-1,-1,-1,-1,-1,-1,-1,-1,-1,-1,-1,-1,-1,-1,-1,-1,-1,-1,-1,-1,-1,-1,-1,-1,-1,-1,-1,-1,-1,-1,-1,-1,-1,-1,1,0,0.125,0,0.5,0.5,0.125,0.625,0.875,0.625,0.5,1,0,1,1,1,0.5,0.75,1,1,0.5,1,0.625,0.625,0.75,0.375,1,0.625,0,0.125,0.875,0,0.25,0.125,0.25,0.125,0.625,0.125,0.375,0.25,0,0,0.125,0.75,0.125,0.25,0.25,0.125,0.625,0.625,0.75,0,0.125,0.125,0.25,0,0,0.25,0.25,0.25,…	0.202378,0.033026,0.045847,0.201283,0.983727,0.128780,0.021054,0.394819,0.093533,0.574081,0.377208,0.003608,0.112945,0.936927,0.368069,0.329989,0.207253,0.068178,0.322508,0.820915,0.860156,0.996832,0.353299,0.964280,0.004937,0.385240,0.022169,0.798305,0.556777,0.000768,0.874517,0.012293,0.040421,0.033601,0.006041,0.002031,0.006706,0.055721,0.034253,0.174568,0.003095,0.338900,0.024907,0.046282,0.2…	101	123	317	539	na	na	0	na	na	0.19697	0.79214	417	439	18	1445	0	1	0	-1	0.279412	-1	FALSE
all	CIAO3_A375_gRNA907	A375	CIAO3	AGAGGCACCGCTGCACAGGCTGT	ACAGCCTGTGCAGCGGTGCCTCT	ENST00000251588	CAGACACGGGATGTGGACTGTGTCCTCACAACAGGAGAAGTTTTCAGGTTGCTGGAGGAAGAGGGCGTCTCCCTCCCCGACCTGGAACCAGCCCCTCTGGACAGCCTGTGCAGCGGTGCCTCTGCAGAGGAGCCCACCAGCCATCGGGGAGGGGGCTCGGGGGGCTACCTGGAGCACGTGTTCCGGCACGCGGCCCGAGAGCTCTTTGGAATCCATGTGGCTG	aacccctaccaactggtcggggtttgaaac	-16.8	((((((.(((....))).))))))....((((..(((....))).....))))	-43.04	-1,-1,-1,-1,-1,-1,-1,-1,-1,-1,-1,-1,-1,-1,-1,-1,-1,-1,-1,-1,-1,-1,-1,-1,-1,-1,-1,-1,-1,-1,-1,-1,-1,-1,-1,-1,-1,-1,-1,-1,-1,-1,-1,-1,-1,-1,-1,-1,-1,-1,-1,-1,-1,-1,-1,-1,-1,-1,-1,-1,-1,-1,-1,-1,-1,-1,-1,-1,-1,-1,-1,-1,-1,-1,-1,-1,-1,-1,-1,-1,-1,-1,-1,-1,-1,-1,-1,-1,-1,-1,-1,-1,-1,-1,-1,-1,-1,-1,-1,-1,-1,-1,-1,-1,-1,-1,-1,-1,-1,-1,-1,-1,-1,-1,-1,-1,-1,-1,-1,-1,-1,-1,-1,-1,-1,-1,-1,-1,-1,-1,-1,-1,-1,…	0.718134,0.417672,0.659620,0.061208,0.339928,0.875906,0.733740,0.784810,0.944744,0.427262,0.012453,0.915764,0.099207,0.441180,0.221956,0.000052,0.010136,0.356500,0.722485,0.394687,0.778887,0.881561,0.342986,0.905146,0.269515,0.009932,0.117022,0.015244,0.879151,0.465036,0.168262,0.258470,0.835558,0.537883,0.695055,0.564518,0.286378,0.491681,0.940452,0.000067,0.935086,0.399798,0.419070,0.312411,0.7…	101	123	807	1029	na	na	0	na	na	0.428977	0.560133	907	929	18	1445	0	1	0	-1	0.622549	-1	FALSE
all	CIAO3_A375_gRNA1150	A375	CIAO3	GCAGCGCCCTCGTTTGAGCCTCT	AGAGGCTCAAACGAGGGCGCTGC	ENST00000251588	AGGAACAAAGACTTCCAGGAGGTGACACTGGAGAAGGAGGGCCAGGTGCTGCTGCACTTCGCAATGGCGTACGGCTTCCGCAACATCCAGAACCTGGTGCAGAGGCTCAAACGAGGGCGCTGCCCCTACCACTACGTGGAGGTCATGGCCTGCCCCTCAGGCTGCCTGAACGGCGGGGGCCAGCTCCAGGCCCCAGACAGGCCCAGCAGAGAGCTCCTCCAGC	aacccctaccaactggtcggggtttgaaac	-16.2	((((((.(((....))).))))))(.(((((.((....))))))).)......	-41.34	0,0,0,0.667,0.333,0.833,0.667,1,0.167,0.5,0.833,0,0,0,0.167,0.167,0,0.167,0.5,0.667,0.333,0,1,1,1,0.833,0.5,0,0,0,0.5,0.5,0,1,0,0.167,0.167,0,0.667,0.333,0.167,0.167,0.667,0.333,0.833,0.167,1,0.167,0.167,0,0,0,0,0,0,0.333,0.167,0.167,0.667,0.667,0,0,0.667,0,0,0.667,0.167,0.5,0.167,0.833,0,0.167,0,0,0,0.167,0,0,0.5,0,0,0.667,0.333,0.333,1,0,0.167,0.167,-1,-1,-1,-1,-1,-1,-1,-1,-1,-1,-1,-1,-1,-1,-1,…	0.178669,0.182233,0.269342,0.026093,0.375247,0.257189,0.323005,0.472370,0.070311,0.573959,0.044351,0.032349,0.043876,0.190356,0.504285,0.253106,0.047392,0.050715,0.343648,0.047405,0.606492,0.911205,0.035983,0.737353,0.033946,0.031598,0.011646,0.007336,0.101117,0.162657,0.375806,0.010345,0.476913,0.017500,0.176603,0.014148,0.002122,0.039400,0.219390,0.001427,0.041286,0.216906,0.010641,0.032106,0.3…	101	123	1050	1272	na	na	0	na	na	0.544034	0.445076	1150	1172	18	1445	0	1	0	-1	0.792717	-1	FALSE
all	CIAO3_A375_gRNA1396	A375	CIAO3	CTTCTCCACGGCGTGGTACTGCG	CGCAGTACCACGCCGTGGAGAAG	ENST00000251588	GTCCGGGCTGAGGCGCCCGAGGACGCGCCTGGGGTTCAGGAGCTGTACACACACTGGCTGCAGGGCACGGACTCGGAGTGTGCAGGTCGCTTGCTGCATACGCAGTACCACGCCGTGGAGAAGGCCAGCACTGGCCTGGGCATCCGGTGGTAGGGGCTGCAGGACCAGGACTCCCAGGAGGCCGTGTCCATGTGTGACAGCAGAACCACATGCCCCAAGACCC	aacccctaccaactggtcggggtttgaaac	-15.7	((((((.(((....))).))))))...........((((...)))).......	-41.65	1,0.504,0,0.126,0,0,0,0.125,0.125,1,0.973,0.751,0.874,0.25,0.25,0,0.25,0.745,1,0.995,0.62,1,0.248,0.248,0.248,0,0.372,0.248,0.124,0,0.124,0,0.124,0.248,0.62,0.869,0.124,0,0,0.372,0.62,0.248,0,0,0.37,0,0.246,0.61,0.61,0,0.366,0.122,0.604,0.242,0.121,0.121,0.363,0.12,0.239,0.239,0.239,0.12,0,0.118,0,0.118,0.118,0,0,0.117,0,0.234,0.464,0.348,0.348,0,0.232,0.115,0,0.573,0.688,0,0.226,0.34,0,0.34,0.56…	0.211821,0.129706,0.086444,0.045760,0.643653,0.853834,0.243273,0.052234,0.003362,0.978975,0.314372,0.002242,0.051243,0.005337,0.793517,0.031735,0.007341,0.002152,0.031267,0.002199,0.346862,0.460157,0.062623,0.210013,0.000079,0.005374,0.048780,0.000346,0.177056,0.345366,0.645175,0.033066,0.281039,0.136224,0.003108,0.164218,0.000558,0.015632,0.196574,0.518308,0.131922,0.356747,0.043755,0.005983,0.4…	101	123	1296	1518	na	na	0	na	na	0.660511	0.328598	1396	1418	18	1445	0	1	0	-1	0.964986	-1	FALSE
all	TSG101_A375_gRNA467	A375	TSG101	TTTCACGTACAGTTAGGTCTCTG	CAGAGACCTAACTGTACGTGAAA	ENST00000251968	GCAGCGGCTGACCCTCTGCCTGCGGGGAAGGGAGTCGCCAGGCGGCCGTCATGGCGGTGTCGGAGAGCCAGCTCAAGAAAATGGTGTCCAAGTACAAATACAGAGACCTAACTGTACGTGAAACTGTCAATGTTATTACTCTATACAAAGATCTCAAACCTGTTTTGGATTCATATGTTTTTAACGATGGCAGTTCCAGGGAACTAATGAACCTCACTGGAAC	aacccctaccaactggtcggggtttgaaac	-15.2	((((((.(((....))).)))))).((.((((..((.....)).)))).))..	-37.4	-1,-1,-1,0,-1,0,0,-1,-1,-1,-1,-1,-1,-1,-1,-1,-1,0.689,0.172,0,0.344,0,-1,0,0.517,1,1,1,0.861,0.172,0.172,0.344,1,0.344,0.172,0.344,0,0.517,0.344,0.172,0.344,0.172,0,0,0.689,0,0.861,0,0,0,0.689,0.172,0.172,1,0.172,0,0.172,0.689,0.172,0.172,0.517,0.172,0.689,0.689,0.689,0.517,0.344,0,0.344,0.172,0.344,0.861,0.344,1,0.861,0.689,0.345,0.69,0.862,0.517,0.69,0,0.173,0.345,0.173,0.345,0.519,0.346,0,0,0,…	0.800677,0.244712,0.685260,0.293815,0.761129,0.073484,0.288304,0.675777,0.851970,0.965370,0.416428,0.138106,0.065746,0.995182,0.744247,0.222270,0.517039,0.649270,0.786469,0.648901,0.900256,0.998221,0.645336,0.861938,0.488691,0.989709,0.768285,0.940727,0.516517,0.581422,0.378965,0.025360,0.337952,0.011264,0.662475,0.021758,0.153659,0.218763,0.592867,0.016147,0.074465,0.011625,0.099366,0.245355,0.6…	101	123	367	589	na	na	0	na	na	0.255482	0.731908	467	489	417	1586	0	1	0	-1	0.042735	-1	FALSE
all	TSG101_A375_gRNA468	A375	TSG101	GTTTCACGTACAGTTAGGTCTCT	AGAGACCTAACTGTACGTGAAAC	ENST00000251968	CAGCGGCTGACCCTCTGCCTGCGGGGAAGGGAGTCGCCAGGCGGCCGTCATGGCGGTGTCGGAGAGCCAGCTCAAGAAAATGGTGTCCAAGTACAAATACAGAGACCTAACTGTACGTGAAACTGTCAATGTTATTACTCTATACAAAGATCTCAAACCTGTTTTGGATTCATATGTTTTTAACGATGGCAGTTCCAGGGAACTAATGAACCTCACTGGAACA	aacccctaccaactggtcggggtttgaaac	-14.2	((((((.(((....))).))))))....((((...))))..............	-38.42	-1,-1,0,-1,0,0,-1,-1,-1,-1,-1,-1,-1,-1,-1,-1,0.689,0.172,0,0.344,0,-1,0,0.517,1,1,1,0.861,0.172,0.172,0.344,1,0.344,0.172,0.344,0,0.517,0.344,0.172,0.344,0.172,0,0,0.689,0,0.861,0,0,0,0.689,0.172,0.172,1,0.172,0,0.172,0.689,0.172,0.172,0.517,0.172,0.689,0.689,0.689,0.517,0.344,0,0.344,0.172,0.344,0.861,0.344,1,0.861,0.689,0.345,0.69,0.862,0.517,0.69,0,0.173,0.345,0.173,0.345,0.519,0.346,0,0,0,0,-…	0.863203,0.145130,0.446038,0.166581,0.780381,0.048164,0.314882,0.693616,0.877816,0.936884,0.646628,0.128237,0.088172,0.995556,0.675602,0.145357,0.412313,0.631221,0.659184,0.703228,0.914923,0.998337,0.636388,0.895470,0.384505,0.988290,0.825059,0.948217,0.574203,0.339621,0.277564,0.019966,0.213839,0.006745,0.443697,0.014082,0.075086,0.232522,0.446366,0.058114,0.101416,0.008101,0.078266,0.204681,0.6…	101	123	368	590	na	na	0	na	na	0.256031	0.73136	468	490	417	1586	0	1	0	-1	0.0435897	-1	FALSE
all	TSG101_A375_gRNA478	A375	TSG101	AACATTGACAGTTTCACGTACAG	CTGTACGTGAAACTGTCAATGTT	ENST00000251968	CCCTCTGCCTGCGGGGAAGGGAGTCGCCAGGCGGCCGTCATGGCGGTGTCGGAGAGCCAGCTCAAGAAAATGGTGTCCAAGTACAAATACAGAGACCTAACTGTACGTGAAACTGTCAATGTTATTACTCTATACAAAGATCTCAAACCTGTTTTGGATTCATATGTTTTTAACGATGGCAGTTCCAGGGAACTAATGAACCTCACTGGAACAATCCCTGTGC	aacccctaccaactggtcggggtttgaaac	-16.5	((((((.(((....))).))))))((((((..........)))))).......	-34.45	-1,-1,-1,-1,-1,-1,0.689,0.172,0,0.344,0,-1,0,0.517,1,1,1,0.861,0.172,0.172,0.344,1,0.344,0.172,0.344,0,0.517,0.344,0.172,0.344,0.172,0,0,0.689,0,0.861,0,0,0,0.689,0.172,0.172,1,0.172,0,0.172,0.689,0.172,0.172,0.517,0.172,0.689,0.689,0.689,0.517,0.344,0,0.344,0.172,0.344,0.861,0.344,1,0.861,0.689,0.345,0.69,0.862,0.517,0.69,0,0.173,0.345,0.173,0.345,0.519,0.346,0,0,0,0,-1,-1,-1,-1,-1,-1,-1,-1,-1,-…	0.910288,0.216788,0.452711,0.313685,0.441413,0.123652,0.242900,0.790865,0.821972,0.851803,0.635594,0.313013,0.009135,0.994900,0.336859,0.013559,0.331235,0.684732,0.525095,0.901451,0.886378,0.999020,0.522429,0.919180,0.345341,0.979983,0.811909,0.966735,0.559241,0.101672,0.175369,0.065201,0.179261,0.012972,0.134184,0.010600,0.067271,0.320677,0.236485,0.066280,0.132991,0.009785,0.118708,0.188369,0.4…	101	123	378	600	na	na	0	na	na	0.261513	0.725877	478	500	417	1586	0	1	0	-1	0.0521368	-1	FALSE
all	TSG101_A375_gRNA573	A375	TSG101	GGGATTGTTCCAGTGAGGTTCAT	ATGAACCTCACTGGAACAATCCC	ENST00000251968	CCTAACTGTACGTGAAACTGTCAATGTTATTACTCTATACAAAGATCTCAAACCTGTTTTGGATTCATATGTTTTTAACGATGGCAGTTCCAGGGAACTAATGAACCTCACTGGAACAATCCCTGTGCCTTATAGAGGTAATACATACAATATTCCAATATGCCTATGGCTACTGGACACATACCCATATAATCCCCCTATCTGTTTTGTTAAGCCTACTAGT	aacccctaccaactggtcggggtttgaaac	-16.9	((((((.(((....))).))))))((((((.(((....))).))....)))).	-36.98	-1,-1,-1,-1,-1,-1,-1,-1,-1,-1,-1,-1,-1,-1,-1,-1,-1,-1,-1,-1,-1,-1,-1,-1,-1,-1,-1,-1,-1,-1,-1,-1,-1,-1,-1,-1,-1,-1,-1,-1,-1,-1,-1,-1,-1,-1,-1,-1,-1,-1,-1,-1,-1,-1,-1,-1,-1,-1,-1,-1,-1,-1,-1,-1,-1,-1,-1,-1,-1,-1,-1,-1,-1,-1,-1,-1,-1,-1,-1,-1,-1,-1,-1,-1,-1,-1,-1,-1,-1,-1,-1,-1,-1,-1,-1,-1,-1,-1,-1,-1,-1,-1,-1,-1,-1,-1,-1,-1,-1,-1,-1,-1,-1,-1,-1,-1,-1,-1,-1,-1,-1,-1,-1,-1,-1,-1,-1,-1,-1,-1,-1,-1,-1,…	0.668687,0.170094,0.321631,0.647873,0.370640,0.754669,0.234098,0.809010,0.208693,0.703707,0.154533,0.178572,0.076847,0.980628,0.076949,0.006622,0.152770,0.544076,0.652692,0.757230,0.790012,0.992325,0.687487,0.848990,0.188080,0.496973,0.195658,0.977097,0.487391,0.204232,0.132223,0.020702,0.519203,0.148088,0.308857,0.127330,0.121026,0.156923,0.062866,0.044516,0.160320,0.008756,0.546042,0.026779,0.1…	101	123	473	695	na	na	0	na	na	0.313596	0.673794	573	595	417	1586	0	1	0	-1	0.133333	-1	FALSE
all	TSG101_A375_gRNA630	A375	TSG101	GTGTCCAGTAGCCATAGGCATAT	ATATGCCTATGGCTACTGGACAC	ENST00000251968	TTTGGATTCATATGTTTTTAACGATGGCAGTTCCAGGGAACTAATGAACCTCACTGGAACAATCCCTGTGCCTTATAGAGGTAATACATACAATATTCCAATATGCCTATGGCTACTGGACACATACCCATATAATCCCCCTATCTGTTTTGTTAAGCCTACTAGTTCAATGACTATTAAAACAGGAAAGCATGTTGATGCAAATGGGAAGATATATCTTCCT	aacccctaccaactggtcggggtttgaaac	-15.6	((((((.(((....))).))))))................(((...)))....	-36.93	-1,-1,-1,-1,-1,-1,-1,-1,-1,-1,-1,-1,-1,-1,-1,-1,-1,-1,-1,-1,-1,-1,-1,-1,-1,-1,-1,-1,-1,-1,-1,-1,-1,-1,-1,-1,-1,-1,-1,-1,-1,-1,-1,-1,-1,-1,-1,-1,-1,-1,-1,-1,-1,-1,-1,-1,-1,-1,-1,-1,-1,-1,-1,-1,-1,-1,-1,-1,-1,-1,-1,-1,-1,-1,-1,-1,-1,-1,-1,-1,-1,-1,-1,-1,0.429,0.286,1,1,1,0.857,0.857,1,1,1,1,1,0.288,0,0.432,0.145,0.579,0.29,0.435,0.29,0.146,0,0,0.874,0.291,0.293,0.293,0,0,0.147,0.295,0.147,0,0.147,0…	0.424530,0.306404,0.051449,0.851974,0.966695,0.842719,0.094261,0.723907,0.169929,0.856997,0.829626,0.001140,0.017152,0.995652,0.677303,0.392905,0.129979,0.450926,0.881301,0.051623,0.772943,0.995930,0.806605,0.933254,0.110770,0.536867,0.465292,0.777702,0.442247,0.003305,0.140258,0.014617,0.073368,0.019404,0.010293,0.031865,0.009339,0.386725,0.011754,0.823038,0.001364,0.692651,0.535885,0.079978,0.4…	101	123	530	752	na	na	0	na	na	0.344846	0.642544	630	652	417	1586	0	1	0	-1	0.182051	-1	FALSE
all	TSG101_A375_gRNA1395	A375	TSG101	TCTGCATACAGATTCAGGATCTG	CAGATCCTGAATCTGTATGCAGA	ENST00000251968	GAAGGATGAAGAACTCAGTTCTGCTCTGGAAAAAATGGAAAATCAGTCTGAAAACAATGATATCGATGAAGTTATCATTCCCACAGCTCCCTTATACAAACAGATCCTGAATCTGTATGCAGAAGAAAACGCTATTGAAGACACTATCTTTTACTTGGGAGAAGCCTTGAGAAGGGGCGTGATAGACCTGGATGTCTTCCTGAAGCATGTACGTCTTCTGTCC	aacccctaccaactggtcggggtttgaaac	-17.3	.(((((.(((....))).)))))(((((..((((....)))))))))......	-33.71	0.674,0.225,0.337,0.337,0.449,0.454,0.227,0.34,0.794,0.227,0.228,0,0.114,0.114,0,0.228,0.228,0.114,0,0,0.344,0.458,0,0,0,0.115,0.689,0,0.344,0.574,0.115,0.574,0.688,0.803,0.344,0.458,0.115,0,0.908,0.802,0.458,1,0.115,0.229,0.802,0.458,0.229,0.115,0.687,0,0.802,1,1,0.687,0.802,0,0.115,0,0.229,0.229,0.115,0.344,0.115,0,0.115,0.573,0.458,0.573,0.229,0.687,0.115,0.458,0.344,0.115,0,0,0.344,0.229,0.22…	0.013239,0.029826,0.306429,0.371426,0.663222,0.009974,0.012451,0.068503,0.002630,0.472572,0.602310,0.000016,0.054943,0.985997,0.740575,0.494769,0.029914,0.318979,0.067548,0.023522,0.753930,0.645466,0.084163,0.913186,0.003825,0.571302,0.374025,0.629590,0.022912,0.154846,0.021141,0.001520,0.018227,0.000286,0.122884,0.000004,0.000758,0.000570,0.000220,0.416762,0.000061,0.014392,0.095305,0.001030,0.7…	101	123	1295	1517	na	na	0	na	na	0.764254	0.223136	1395	1417	417	1586	0	1	0	-1	0.835897	-1	FALSE
all	RAN_A375_gRNA375	A375	RAN	CCTCAACACCCAAGGTGGCTACA	TGTAGCCACCTTGGGTGTTGAGG	ENST00000543796	AGCCCCAGGTCCAGTTCAAACTTGTATTGGTTGGTGATGGTGGTACTGGAAAAACGACCTTCGTGAAACGTCATTTGACTGGTGAATTTGAGAAGAAGTATGTAGCCACCTTGGGTGTTGAGGTTCATCCCCTAGTGTTCCACACCAACAGAGGACCTATTAAGTTCAATGTATGGGACACAGCCGGCCAGGAGAAATTCGGTGGACTGAGAGATGGCTATTA	aacccctaccaactggtcggggtttgaaac	-16.7	.(((((.(((....))).)))))((((.....))))((((...))))......	-38.63	-1,-1,-1,-1,-1,-1,-1,-1,-1,-1,-1,-1,-1,-1,-1,-1,-1,-1,-1,-1,-1,-1,-1,-1,-1,-1,-1,-1,-1,-1,-1,-1,-1,-1,-1,-1,-1,-1,-1,-1,-1,-1,-1,-1,-1,-1,-1,-1,-1,-1,-1,-1,-1,-1,-1,-1,-1,-1,-1,-1,-1,-1,-1,-1,-1,-1,-1,-1,-1,-1,-1,-1,-1,-1,-1,-1,-1,-1,-1,-1,-1,-1,-1,-1,-1,-1,-1,-1,-1,-1,-1,-1,-1,-1,-1,-1,-1,-1,-1,-1,-1,-1,-1,-1,-1,0.448,0.498,0.299,0.348,0.347,0.794,0.645,0.025,0.149,0.074,0.198,0.099,0.074,0.198,…	0.901406,0.664139,0.948053,0.557957,0.660501,0.348297,0.072996,0.338593,0.853375,0.978732,0.330924,0.498866,0.064376,0.764934,0.911060,0.151077,0.827392,0.437327,0.577874,0.144030,0.686002,0.836265,0.082713,0.892533,0.897048,0.307151,0.421639,0.054208,0.859348,0.466063,0.945538,0.639748,0.646267,0.642400,0.301830,0.372448,0.077118,0.275443,0.807479,0.681129,0.780527,0.237025,0.181449,0.769267,0.5…	101	123	275	497	na	na	0	na	na	0.140549	0.850808	375	397	259	906	0	1	0	-1	0.179012	-1	FALSE
all	RAN_A375_gRNA474	A375	RAN	AATAGCCATCTCTCAGTCCACCG	CGGTGGACTGAGAGATGGCTATT	ENST00000543796	ATGTAGCCACCTTGGGTGTTGAGGTTCATCCCCTAGTGTTCCACACCAACAGAGGACCTATTAAGTTCAATGTATGGGACACAGCCGGCCAGGAGAAATTCGGTGGACTGAGAGATGGCTATTATATCCAAGCCCAGTGTGCCATCATAATGTTTGATGTAACATCGAGAGTTACTTACAAGAATGTGCCTAACTGGCATAGAGATCTGGTACGAGTGTGTGA	aacccctaccaactggtcggggtttgaaac	-12.8	((((((.(((....))).)))))).............................	-42.13	-1,-1,-1,-1,-1,-1,0.448,0.498,0.299,0.348,0.347,0.794,0.645,0.025,0.149,0.074,0.198,0.099,0.074,0.198,0.346,0.074,0.173,0.37,0.321,0.294,0.318,0.318,0.122,0.171,0.073,0.073,0.194,0.267,0.533,0.096,0.168,0.144,0.192,0.12,0.072,0.406,0.191,0.191,0.31,0.047,0.284,0.473,0.189,0.308,0.305,0.563,0.305,0.305,0.539,0.534,0.139,0.163,0.65,0.65,0.483,0.805,1,1,0.621,0.48,0.297,0.503,0.64,0.32,0.477,1,1,1,0…	0.617376,0.685634,0.261134,0.136383,0.650445,0.136203,0.203932,0.075717,0.994602,0.992251,0.910144,0.110259,0.711982,0.998731,0.947495,0.145147,0.267679,0.552690,0.926676,0.585075,0.581619,0.616522,0.312452,0.895768,0.942716,0.347422,0.541989,0.111004,0.782429,0.009324,0.953601,0.588529,0.224383,0.068741,0.912736,0.031733,0.658449,0.434676,0.238056,0.821496,0.012532,0.194223,0.033998,0.414635,0.3…	101	123	374	596	na	na	0	na	na	0.177753	0.813604	474	496	259	906	0	1	0	-1	0.33179	-1	FALSE
all	RAN_A375_gRNA574	A375	RAN	TCACACACTCGTACCAGATCTCT	AGAGATCTGGTACGAGTGTGTGA	ENST00000543796	CGGTGGACTGAGAGATGGCTATTATATCCAAGCCCAGTGTGCCATCATAATGTTTGATGTAACATCGAGAGTTACTTACAAGAATGTGCCTAACTGGCATAGAGATCTGGTACGAGTGTGTGAAAACATCCCCATTGTGTTGTGTGGCAACAAAGTGGATATTAAGGACAGGAAAGTGAAGGCGAAATCCATTGTCTTCCACCGAAAGAAGAATCTTCAGTAC	aacccctaccaactggtcggggtttgaaac	-13.8	............(((((((((((.(((...))).)).)))).)))))......	-41.56	0.422,0.178,0.133,0.022,0.044,0.178,0.111,0.156,0.178,0.289,0.133,0.311,0.356,0.444,0.156,0.089,0.067,0.022,0.067,0.156,0.156,0.333,0.511,0.4,0.556,0.311,0.267,0.022,0.2,0,0,0,0.056,0.037,0,0.019,0.074,0.241,0.056,0.148,0.148,0.019,0.13,0.019,0.056,0.056,0.222,0.315,0.333,0.093,0.037,0.037,0.056,0.037,0.056,0.111,0.037,0.111,0.019,0.093,0.278,0.204,0.148,0.13,0.093,0.037,0.222,0.13,0.315,0.426,0.…	0.953552,0.724969,0.703726,0.675618,0.681156,0.696869,0.876105,0.498451,0.985327,0.996680,0.996933,0.132789,0.114767,0.996095,0.960561,0.262027,0.568468,0.264663,0.603390,0.229030,0.881642,0.686856,0.721523,0.879347,0.994370,0.955649,0.583750,0.656809,0.993749,0.510249,0.877743,0.824504,0.358408,0.239811,0.840447,0.013962,0.962419,0.953733,0.073772,0.847149,0.906474,0.548797,0.250018,0.900265,0.9…	101	123	474	696	na	na	0	na	na	0.215333	0.776024	574	596	259	906	0	1	0	-1	0.486111	-1	FALSE
all	RAN_A375_gRNA767	A375	RAN	AACAAATTCCAAGTTAGGGTCTC	GAGACCCTAACTTGGAATTTGTT	ENST00000543796	GTCTTCCACCGAAAGAAGAATCTTCAGTACTACGACATTTCTGCCAAAAGTAACTACAACTTTGAAAAGCCCTTCCTCTGGCTTGCTAGGAAGCTCATTGGAGACCCTAACTTGGAATTTGTTGCCATGCCTGCTCTCGCCCCACCAGAAGTTGTCATGGACCCAGCTTTGGCAGCACAGTATGAGCACGACTTAGAGGTTGCTCAGACAACTGCTCTCCCGG	aacccctaccaactggtcggggtttgaaac	-13.8	((((((.(((....))).)))))).............(((......)))....	-34.2	0.056,0,0.056,0.056,0.056,0.037,0.131,0.037,0.056,0.056,0.056,0.168,0.187,0.187,0.168,0.392,0.187,0.336,0.317,0.598,0.224,0.149,0.299,0.019,0.037,0.15,0,1,1,0.67,0.943,0.58,0.354,0.663,0.31,0.177,0.531,0.175,0.307,0.394,0.351,0.482,0.435,0.261,0.261,0.609,0.857,0.987,0.997,0.987,1,0.604,0.216,0.086,0.605,0.259,0,0,0.043,0,0,0,0.043,0,0.087,0.043,0,0.043,0,0,0,0,0.044,0,0,0.044,0,0,0.087,0.044,0,0…	0.518532,0.802326,0.140845,0.148014,0.768941,0.319500,0.159825,0.047060,0.239244,0.787017,0.946413,0.206767,0.050269,0.456066,0.705113,0.139712,0.095040,0.021074,0.464337,0.036878,0.814376,0.524054,0.059916,0.704815,0.897362,0.057414,0.478530,0.086662,0.408451,0.047405,0.746433,0.130463,0.816725,0.262933,0.150760,0.295664,0.225110,0.179259,0.589063,0.294568,0.023799,0.091958,0.145024,0.086741,0.2…	101	123	667	889	na	na	0	na	na	0.287862	0.703495	767	789	259	906	0	1	0	-1	0.783951	-1	FALSE
all	RAN_A375_gRNA848	A375	RAN	AGCAACCTCTAAGTCGTGCTCAT	ATGAGCACGACTTAGAGGTTGCT	ENST00000543796	CTTGCTAGGAAGCTCATTGGAGACCCTAACTTGGAATTTGTTGCCATGCCTGCTCTCGCCCCACCAGAAGTTGTCATGGACCCAGCTTTGGCAGCACAGTATGAGCACGACTTAGAGGTTGCTCAGACAACTGCTCTCCCGGATGAGGATGATGACCTGTGAGAATGAAGCTGGAGCCCAGCGTCAGAAGTCTAGTTTTATAGGCAGCTGTCCTGTGATGTCA	aacccctaccaactggtcggggtttgaaac	-14.5	((((((.(((....))).))))))......((((((......))..))))...	-36.38	0.044,0,0,0.044,0,0.131,0,0,0.131,0.087,0.044,0,0.088,0,0.088,0,0.175,0.044,0,0.175,0.044,0.304,0.217,0.087,0.043,0,0.043,0.388,0.388,0,0.172,0.171,0.129,0.214,0.471,0.086,0.256,0.256,0.383,0.383,0.256,0.254,0.381,0.042,0.212,0.212,0.337,0.042,0,0,0.169,0.207,0.041,0.041,0.124,0.083,0.324,0.081,0.081,0.04,0.121,0.238,0.198,0.159,0.83,0.793,0.431,0.549,0.706,0.314,0.078,0.976,0.776,0.155,0.349,0.3…	0.580984,0.279305,0.541917,0.002202,0.231017,0.183550,0.061718,0.190200,0.296295,0.981642,0.833446,0.024358,0.028024,0.157230,0.843980,0.578960,0.431747,0.413095,0.452456,0.007856,0.677869,0.339160,0.037704,0.745751,0.817647,0.296168,0.082607,0.038403,0.218008,0.447603,0.022379,0.141065,0.135920,0.020934,0.977948,0.085125,0.010754,0.041746,0.097605,0.045763,0.009256,0.019957,0.011946,0.073487,0.2…	101	123	748	970	na	na	0	na	na	0.318301	0.673055	848	870	259	906	0	1	0	-1	0.908951	-1	FALSE
all	RAN_A375_gRNA863	A375	RAN	GAGAGCAGTTGTCTGAGCAACCT	AGGTTGCTCAGACAACTGCTCTC	ENST00000543796	ATTGGAGACCCTAACTTGGAATTTGTTGCCATGCCTGCTCTCGCCCCACCAGAAGTTGTCATGGACCCAGCTTTGGCAGCACAGTATGAGCACGACTTAGAGGTTGCTCAGACAACTGCTCTCCCGGATGAGGATGATGACCTGTGAGAATGAAGCTGGAGCCCAGCGTCAGAAGTCTAGTTTTATAGGCAGCTGTCCTGTGATGTCAGCGGTGCAGCGTGTG	aacccctaccaactggtcggggtttgaaac	-16.1	((((((.(((....))).)))))).............(((((....)))))..	-37.58	0,0.175,0.044,0,0.175,0.044,0.304,0.217,0.087,0.043,0,0.043,0.388,0.388,0,0.172,0.171,0.129,0.214,0.471,0.086,0.256,0.256,0.383,0.383,0.256,0.254,0.381,0.042,0.212,0.212,0.337,0.042,0,0,0.169,0.207,0.041,0.041,0.124,0.083,0.324,0.081,0.081,0.04,0.121,0.238,0.198,0.159,0.83,0.793,0.431,0.549,0.706,0.314,0.078,0.976,0.776,0.155,0.349,0.31,0.077,0.231,0.346,0.538,0.461,0.114,0.343,0.609,0.305,0.152,…	0.678147,0.513034,0.801893,0.002857,0.307326,0.279686,0.272374,0.216385,0.330966,0.993693,0.922175,0.011096,0.010147,0.072251,0.869591,0.817408,0.598821,0.230131,0.177806,0.004195,0.680264,0.323926,0.041513,0.906151,0.771165,0.491946,0.039151,0.039156,0.633780,0.612043,0.399310,0.114497,0.087516,0.030993,0.974193,0.070487,0.011215,0.370020,0.291602,0.011731,0.039346,0.024524,0.018568,0.084247,0.2…	101	123	763	985	na	na	0	na	na	0.323938	0.667418	863	885	259	906	0	1	0	-1	0.932099	-1	FALSE
all	WARS1_A375_gRNA1140	A375	WARS1	TCCCCATGTAGTCCAGGTCAGAG	CTCTGACCTGGACTACATGGGGA	ENST00000392882	TGTGGAAGGACCTGACCCTGGACCAGGCCTATAGCTATGCTGTGGAGAATGCCAAGGACATCATCGCCTGTGGCTTTGACATCAACAAGACTTTCATATTCTCTGACCTGGACTACATGGGGATGAGCTCAGGTTTCTACAAAAATGTGGTGAAGATTCAAAAGCATGTTACCTTCAACCAAGTGAAAGGCATTTTCGGCTTCACTGACAGCGACTGCATTGG	aacccctaccaactggtcggggtttgaaac	-14.5	((((((.(((....))).)))))).....(((.((.((.....))))...)))	-43.43	0.576,0.748,0.518,0.97,1,1,0.288,0.345,0.864,1,0.115,0.115,0.23,0.461,0.633,0.173,0.058,0.23,0.115,0.173,0.691,0.748,0.058,0.115,0.23,0,0.23,0.173,0.403,0.921,0.518,0.633,0.806,0.288,0.173,0.691,0.691,0.748,0.518,0.286,0.629,0.744,0.515,0.801,1,0.114,0.284,1,1,0.906,0.227,0.113,0.227,0.34,0.113,0.226,1,0.056,0.621,1,0.225,0.112,0.337,0.225,0.281,0.113,0.056,0,0.225,0.62,0.282,0.113,0.056,0.395,0.…	0.534056,0.256845,0.530719,0.544580,0.966985,0.414813,0.091267,0.597608,0.610100,0.996844,0.580495,0.190841,0.051160,0.901101,0.366452,0.658723,0.352337,0.599537,0.693353,0.297994,0.951034,0.989423,0.687334,0.951479,0.243589,0.907395,0.501183,0.651249,0.858951,0.137767,0.030685,0.174131,0.525253,0.023886,0.478297,0.011652,0.072905,0.540307,0.082930,0.135110,0.037296,0.941005,0.081148,0.116089,0.7…	101	123	1040	1262	na	na	0	na	na	0.387679	0.604493	1140	1162	436	1848	0	1	0	-1	0.498231	-1	FALSE
all	WARS1_A375_gRNA1141	A375	WARS1	ATCCCCATGTAGTCCAGGTCAGA	TCTGACCTGGACTACATGGGGAT	ENST00000392882	GTGGAAGGACCTGACCCTGGACCAGGCCTATAGCTATGCTGTGGAGAATGCCAAGGACATCATCGCCTGTGGCTTTGACATCAACAAGACTTTCATATTCTCTGACCTGGACTACATGGGGATGAGCTCAGGTTTCTACAAAAATGTGGTGAAGATTCAAAAGCATGTTACCTTCAACCAAGTGAAAGGCATTTTCGGCTTCACTGACAGCGACTGCATTGGG	aacccctaccaactggtcggggtttgaaac	-13.2	((((((.(((....))).))))))....((((....)))).............	-41.98	0.748,0.518,0.97,1,1,0.288,0.345,0.864,1,0.115,0.115,0.23,0.461,0.633,0.173,0.058,0.23,0.115,0.173,0.691,0.748,0.058,0.115,0.23,0,0.23,0.173,0.403,0.921,0.518,0.633,0.806,0.288,0.173,0.691,0.691,0.748,0.518,0.286,0.629,0.744,0.515,0.801,1,0.114,0.284,1,1,0.906,0.227,0.113,0.227,0.34,0.113,0.226,1,0.056,0.621,1,0.225,0.112,0.337,0.225,0.281,0.113,0.056,0,0.225,0.62,0.282,0.113,0.056,0.395,0.226,0.…	0.542641,0.228419,0.677478,0.642093,0.965246,0.522980,0.086525,0.614593,0.530533,0.995594,0.625876,0.218622,0.050361,0.905815,0.417202,0.556707,0.399324,0.599894,0.860690,0.370677,0.949740,0.989705,0.711796,0.938306,0.201360,0.902590,0.436128,0.708455,0.780433,0.124767,0.023976,0.173963,0.492006,0.031132,0.677721,0.011588,0.079101,0.454019,0.064258,0.062058,0.025204,0.954014,0.117152,0.093259,0.7…	101	123	1041	1263	na	na	0	na	na	0.388019	0.604152	1141	1163	436	1848	0	1	0	-1	0.498938	-1	FALSE
all	WARS1_A375_gRNA1331	A375	WARS1	AAGGCACTGGATATCCGTCCTGT	ACAGGACGGATATCCAGTGCCTT	ENST00000392882	ATTTTCGGCTTCACTGACAGCGACTGCATTGGGAAGATCAGTTTTCCTGCCATCCAGGCTGCTCCCTCCTTCAGCAACTCATTCCCACAGATCTTCCGAGACAGGACGGATATCCAGTGCCTTATCCCATGTGCCATTGACCAGGATCCTTACTTTAGAATGACAAGGGACGTCGCCCCCAGGATCGGCTATCCTAAACCAGCCCTGCTGCACTCCACCTTCT	aacccctaccaactggtcggggtttgaaac	-17.4	((((((.(((....))).)))))).......(((.((.((....)))))))..	-35.39	-1,-1,-1,-1,-1,-1,-1,-1,-1,-1,-1,-1,-1,-1,-1,-1,-1,-1,-1,-1,0.31,0.897,0.828,0.241,0.862,0.31,0.621,1,1,0,0,0.475,0.428,1,0.285,1,0.95,0.428,1,0.285,1,0.476,1,1,0.714,0.095,0.429,0.286,0.429,0.095,0.476,0.238,0.333,0.286,0.381,0.191,0.238,0.143,0.572,0.333,0.381,0.143,0.095,0.048,0.191,0.191,0.286,0.095,0.143,0.333,0.048,0.524,0.714,0.238,0.381,1,0.667,0.048,0.191,0.476,0.998,0.524,0.191,0.381,0.…	0.076019,0.072564,0.530893,0.014112,0.982182,0.690441,0.047129,0.064668,0.175245,0.922191,0.458334,0.105763,0.074679,0.071348,0.852832,0.301731,0.674590,0.062136,0.140794,0.041172,0.432065,0.782074,0.245586,0.951162,0.466412,0.933853,0.556973,0.012589,0.165609,0.195037,0.527994,0.088040,0.113980,0.027853,0.760203,0.025383,0.001248,0.049865,0.000999,0.719407,0.059438,0.005357,0.126914,0.005193,0.3…	101	123	1231	1453	na	na	0	na	na	0.452689	0.539483	1331	1353	436	1848	0	1	0	-1	0.633404	-1	FALSE
all	WARS1_A375_gRNA1359	A375	WARS1	AAGGATCCTGGTCAATGGCACAT	ATGTGCCATTGACCAGGATCCTT	ENST00000392882	TTGGGAAGATCAGTTTTCCTGCCATCCAGGCTGCTCCCTCCTTCAGCAACTCATTCCCACAGATCTTCCGAGACAGGACGGATATCCAGTGCCTTATCCCATGTGCCATTGACCAGGATCCTTACTTTAGAATGACAAGGGACGTCGCCCCCAGGATCGGCTATCCTAAACCAGCCCTGCTGCACTCCACCTTCTTCCCAGCCCTGCAGGGCGCCCAGACCAA	aacccctaccaactggtcggggtttgaaac	-13.9	((((((.(((....))).)))))).....((..(((....)))..))......	-39.98	1,0,0,0.475,0.428,1,0.285,1,0.95,0.428,1,0.285,1,0.476,1,1,0.714,0.095,0.429,0.286,0.429,0.095,0.476,0.238,0.333,0.286,0.381,0.191,0.238,0.143,0.572,0.333,0.381,0.143,0.095,0.048,0.191,0.191,0.286,0.095,0.143,0.333,0.048,0.524,0.714,0.238,0.381,1,0.667,0.048,0.191,0.476,0.998,0.524,0.191,0.381,0.286,0.238,0.048,0.381,0.381,0.476,0.953,0.143,0.238,0.191,0.191,0,0.238,0.572,0.667,0.476,0.572,0.572,…	0.025936,0.435796,0.098178,0.020446,0.861541,0.744440,0.189066,0.038734,0.355019,0.966752,0.512942,0.108115,0.171843,0.163426,0.900239,0.378445,0.617666,0.283346,0.092761,0.060158,0.491876,0.757025,0.094486,0.649723,0.055585,0.873485,0.590371,0.011525,0.225678,0.070955,0.950250,0.237285,0.148980,0.309335,0.880015,0.092527,0.039490,0.262300,0.008819,0.436800,0.050824,0.024609,0.490927,0.040320,0.5…	101	123	1259	1481	na	na	0	na	na	0.462219	0.529952	1359	1381	436	1848	0	1	0	-1	0.65322	-1	FALSE
all	WARS1_A375_gRNA1621	A375	WARS1	AGGTACATGAAAGACACGTCCAC	GTGGACGTGTCTTTCATGTACCT	ENST00000392882	CGACACGGCCAAGCAGATCAAAACCAAGGTCAATAAGCATGCGTTTTCTGGAGGGAGAGACACCATCGAGGAGCACAGGCAGTTTGGGGGCAACTGTGATGTGGACGTGTCTTTCATGTACCTGACCTTCTTCCTCGAGGACGACGACAAGCTCGAGCAGATCAGGAAGGATTACACCAGCGGAGCCATGCTCACCGGTGAGCTCAAGAAGGCACTCATAGAG	aacccctaccaactggtcggggtttgaaac	-14.7	((((((.(((....))).)))))).......((.((.((.....)).))))..	-33.42	0.058,0.35,0.379,0.204,0.204,0.058,0.204,0.204,0.029,0.117,0.322,0.351,0.263,0.409,0.409,0.175,0.526,0.263,0.263,1,0.555,1,0.847,0.088,0.293,0,0,0,0.465,0.29,0.319,0.931,0.405,1,1,1,0.728,0.494,0.962,0.669,0.406,0.554,0.348,0.554,0.613,0.495,0.525,0.554,0.495,0.701,0.407,0.407,0.319,0.231,0.114,0.084,0.143,0.231,0.73,0.407,0.319,0.583,0.202,0.26,0.642,0.348,0.613,0.789,0.29,0.231,0.759,0.407,0.67…	0.027429,0.187705,0.165969,0.053276,0.854856,0.172499,0.233866,0.400133,0.902056,0.487350,0.564972,0.027449,0.760372,0.194279,0.780433,0.075837,0.040248,0.049198,0.423868,0.005121,0.875237,0.393487,0.007141,0.828628,0.191159,0.742951,0.210813,0.017851,0.826045,0.053811,0.429562,0.014127,0.657294,0.024250,0.269837,0.301812,0.125286,0.413938,0.021244,0.034717,0.000689,0.243958,0.062925,0.008562,0.0…	101	123	1521	1743	na	na	0	na	na	0.551396	0.440776	1621	1643	436	1848	0	1	0	-1	0.838641	-1	FALSE
all	WARS1_A375_gRNA1668	A375	WARS1	CCTTCCTGATCTGCTCGAGCTTG	CAAGCTCGAGCAGATCAGGAAGG	ENST00000392882	CTGGAGGGAGAGACACCATCGAGGAGCACAGGCAGTTTGGGGGCAACTGTGATGTGGACGTGTCTTTCATGTACCTGACCTTCTTCCTCGAGGACGACGACAAGCTCGAGCAGATCAGGAAGGATTACACCAGCGGAGCCATGCTCACCGGTGAGCTCAAGAAGGCACTCATAGAGGTTCTGCAGCCCTTGATCGCAGAGCACCAGGCCCGGCGCAAGGAGGT	aacccctaccaactggtcggggtttgaaac	-12.8	((((((.(((....))).)))))).............................	-43.63	0.554,0.495,0.701,0.407,0.407,0.319,0.231,0.114,0.084,0.143,0.231,0.73,0.407,0.319,0.583,0.202,0.26,0.642,0.348,0.613,0.789,0.29,0.231,0.759,0.407,0.671,0.437,0.143,0.29,0.143,0.172,0.084,0.084,0.143,0.29,0.231,0.378,0.29,0.026,0,0.143,0.319,0.29,0.231,0.407,0.348,0.055,0.26,0.114,0.29,0.73,1,0.847,0.583,0.29,0.29,1,0.378,0.437,0.26,0.789,0.963,0.319,0.29,0.935,0.789,0.231,0.671,1,0.759,1,1,0.935…	0.049366,0.092614,0.788498,0.005427,0.379166,0.233710,0.031139,0.068996,0.117338,0.889586,0.276017,0.016798,0.921833,0.223273,0.926812,0.008661,0.068460,0.045043,0.051967,0.001419,0.361856,0.238563,0.031884,0.561729,0.199419,0.494126,0.097242,0.002403,0.205484,0.071323,0.320188,0.011268,0.205573,0.004479,0.016053,0.028293,0.014571,0.088742,0.003310,0.038650,0.000569,0.131091,0.011989,0.041907,0.0…	101	123	1568	1790	na	na	0	na	na	0.567393	0.424779	1668	1690	436	1848	0	1	0	-1	0.871904	-1	FALSE
all	RACK1_A375_gRNA574	A375	RACK1	AGTGACCCCGCAGAGCACGCTGT	ACAGCGTGCTCTGCGGGGTCACT	ENST00000512805	CTACTACCCCGCAGTTCCCGGACATGATCCTCTCCGCCTCTCGAGATAAGACCATCATCATGTGGAAACTGACCAGGGATGAGACCAACTATGGAATTCCACAGCGTGCTCTGCGGGGTCACTCCCACTTTGTTAGTGATGTGGTTATCTCCTCAGATGGCCAGTTTGCCCTCTCAGGCTCCTGGGATGGAACCCTGCGCCTCTGGGATCTCACAACGGGCAC	aacccctaccaactggtcggggtttgaaac	-17.2	((((((.(((....))).))))))....((((((.............))))))	-41.22	0.469,0.852,0.644,0.999,1,0.726,0.151,0.038,0.056,0.111,0.133,0.166,0.295,0.378,0.568,0.285,0.194,0.093,0.093,0.366,1,0.319,0.525,0.434,0.411,0.683,0.999,0.513,0.236,0.488,0.107,0.145,0.237,0.15,0.399,0.42,0.329,0.517,0.361,0.34,0.395,0.003,0,0,0,1,1,1,1,1,1,0.26,0.657,0.619,0.421,0.647,1,0.192,0.529,0.754,0.64,0.18,0.103,0.097,0.229,0.321,0.295,0.136,0.139,0.155,0.46,0.467,0.078,0.19,0.121,0.081…	0.334133,0.681619,0.774350,0.184431,0.750189,0.635145,0.569840,0.681769,0.969989,0.983088,0.993302,0.286543,0.507701,0.833113,0.790934,0.378675,0.274731,0.157464,0.105115,0.026485,0.704977,0.583883,0.396270,0.872020,0.974235,0.872855,0.477567,0.217207,0.642631,0.865890,0.999983,0.171311,0.939933,0.176154,0.983077,0.166129,0.820065,0.784364,0.417575,0.976466,0.523779,0.376343,0.013049,0.881149,0.5…	101	123	474	696	na	na	0	na	na	0.408411	0.575196	574	596	410	1360	0	1	0	-1	0.17245	-1	FALSE
all	RACK1_A375_gRNA725	A375	RACK1	AAGGCCACACTCAGCACATCCTT	AAGGATGTGCTGAGTGTGGCCTT	ENST00000512805	CTCAGATGGCCAGTTTGCCCTCTCAGGCTCCTGGGATGGAACCCTGCGCCTCTGGGATCTCACAACGGGCACCACCACGAGGCGATTTGTGGGCCATACCAAGGATGTGCTGAGTGTGGCCTTCTCCTCTGACAACCGGCAGATTGTCTCTGGATCTCGAGATAAAACCATCAAGCTATGGAATACCCTGGGTGTGTGCAAATACACTGTCCAGGATGAGAGC	aacccctaccaactggtcggggtttgaaac	-13.1	((((((.(((....))).)))))).........((........))........	-40.94	0.508,0.278,0.441,0.177,0.141,0.386,0.459,0.415,0.223,0.19,0.392,0.562,0.294,0.388,0.675,1,0.364,0.142,0.159,0.213,0.116,0.154,0.059,0.013,0.003,0.173,0.575,1,0.821,0.633,0.312,0.16,0.118,0.107,0.22,0.263,0.165,0.145,0.404,0.987,1,0.163,0.179,0.176,0.242,0.115,0.358,0.032,0.034,0.058,0.028,0.194,0.031,0.013,0.021,0.107,0.24,0.191,0.153,0.126,0.29,0.242,0.804,1,0.011,0.003,0.198,0.495,0.31,0.781,0…	0.387603,0.717559,0.714210,0.181878,0.459899,0.352428,0.020393,0.145449,0.404627,0.999146,0.403766,0.054739,0.111294,0.200794,0.842291,0.473445,0.980715,0.349265,0.018022,0.007600,0.559579,0.508071,0.293001,0.760844,0.570364,0.614661,0.138672,0.019011,0.709576,0.029592,0.040378,0.954328,0.778625,0.249180,0.987480,0.044902,0.424216,0.527922,0.204204,0.074115,0.122449,0.745216,0.011554,0.010926,0.3…	101	123	625	847	na	na	0	na	na	0.516037	0.467569	725	747	410	1360	0	1	0	-1	0.33123	-1	FALSE
all	RACK1_A375_gRNA726	A375	RACK1	GAAGGCCACACTCAGCACATCCT	AGGATGTGCTGAGTGTGGCCTTC	ENST00000512805	TCAGATGGCCAGTTTGCCCTCTCAGGCTCCTGGGATGGAACCCTGCGCCTCTGGGATCTCACAACGGGCACCACCACGAGGCGATTTGTGGGCCATACCAAGGATGTGCTGAGTGTGGCCTTCTCCTCTGACAACCGGCAGATTGTCTCTGGATCTCGAGATAAAACCATCAAGCTATGGAATACCCTGGGTGTGTGCAAATACACTGTCCAGGATGAGAGCC	aacccctaccaactggtcggggtttgaaac	-13.5	((((((.(((....))).))))))......((.(((........)).).))..	-42.84	0.278,0.441,0.177,0.141,0.386,0.459,0.415,0.223,0.19,0.392,0.562,0.294,0.388,0.675,1,0.364,0.142,0.159,0.213,0.116,0.154,0.059,0.013,0.003,0.173,0.575,1,0.821,0.633,0.312,0.16,0.118,0.107,0.22,0.263,0.165,0.145,0.404,0.987,1,0.163,0.179,0.176,0.242,0.115,0.358,0.032,0.034,0.058,0.028,0.194,0.031,0.013,0.021,0.107,0.24,0.191,0.153,0.126,0.29,0.242,0.804,1,0.011,0.003,0.198,0.495,0.31,0.781,0.54,0.…	0.467461,0.746097,0.774834,0.229419,0.450482,0.380177,0.016685,0.170877,0.423723,0.999456,0.687102,0.082423,0.148996,0.132950,0.838788,0.595063,0.987558,0.308039,0.041626,0.016797,0.584619,0.504927,0.315541,0.728988,0.649148,0.685440,0.157033,0.019101,0.758052,0.042799,0.086238,0.928591,0.664987,0.204524,0.988683,0.046582,0.621099,0.684108,0.240898,0.042525,0.120824,0.698675,0.019738,0.016811,0.4…	101	123	626	848	na	na	0	na	na	0.51675	0.466857	726	748	410	1360	0	1	0	-1	0.332282	-1	FALSE
all	RACK1_A375_gRNA1232	A375	RACK1	TCTGCCTTGCTGCTGGTACTGAT	ATCAGTACCAGCAGCAAGGCAGA	ENST00000512805	CAGCCCTAACCGCTACTGGCTGTGTGCTGCCACAGGCCCCAGCATCAAGATCTGGGATTTAGAGGGAAAGATCATTGTAGATGAACTGAAGCAAGAAGTTATCAGTACCAGCAGCAAGGCAGAACCACCCCAGTGCACCTCCCTGGCCTGGTCTGCTGATGGCCAGACTCTGTTTGCTGGCTACACGGACAACCTGGTGCGAGTGTGGCAGGTGACCATTGGC	aacccctaccaactggtcggggtttgaaac	-16.4	((((((.(((....))).))))))........((((........)))).....	-39.93	0.238,0.243,0.137,0.104,0.087,0.3,0.512,0.934,0.32,0.098,0.158,0.131,0.358,0.907,0.505,0.167,0.148,0.127,0.054,0.105,0.375,0.503,0.25,0.118,0.279,0.182,0.08,0.126,0.114,0.109,0.119,0.045,0.128,0.069,0.165,0.283,0.328,0.041,0.021,0.064,0.094,0.138,0.194,0.395,0.3,0.61,1,0.498,0.557,1,0.685,0.159,0.079,0.024,-1,-1,-1,-1,-1,-1,0.593,0.453,0.185,0.161,0.5,0.155,0.51,1,0.34,0.815,0.496,0.311,0.352,0.8…	0.954130,0.941985,0.921440,0.852980,0.599933,0.958877,0.518677,0.080376,0.937771,0.999241,0.670083,0.444478,0.587032,0.985324,0.187415,0.219325,0.615995,0.252176,0.608221,0.466713,0.830622,0.281941,0.144685,0.950516,0.999339,0.835901,0.626231,0.808650,0.960441,0.984824,0.979914,0.872819,0.230098,0.188570,0.992989,0.138395,0.836561,0.601935,0.802686,0.975379,0.628581,0.037112,0.021653,0.596139,0.9…	101	123	1132	1354	na	na	0	na	na	0.877406	0.106201	1232	1254	410	1360	0	1	0	-1	0.864353	-1	FALSE
all	RACK1_A375_gRNA1233	A375	RACK1	TTCTGCCTTGCTGCTGGTACTGA	TCAGTACCAGCAGCAAGGCAGAA	ENST00000512805	AGCCCTAACCGCTACTGGCTGTGTGCTGCCACAGGCCCCAGCATCAAGATCTGGGATTTAGAGGGAAAGATCATTGTAGATGAACTGAAGCAAGAAGTTATCAGTACCAGCAGCAAGGCAGAACCACCCCAGTGCACCTCCCTGGCCTGGTCTGCTGATGGCCAGACTCTGTTTGCTGGCTACACGGACAACCTGGTGCGAGTGTGGCAGGTGACCATTGGCA	aacccctaccaactggtcggggtttgaaac	-16.4	((((((.(((....))).)))))).........((((........))))....	-39.86	0.243,0.137,0.104,0.087,0.3,0.512,0.934,0.32,0.098,0.158,0.131,0.358,0.907,0.505,0.167,0.148,0.127,0.054,0.105,0.375,0.503,0.25,0.118,0.279,0.182,0.08,0.126,0.114,0.109,0.119,0.045,0.128,0.069,0.165,0.283,0.328,0.041,0.021,0.064,0.094,0.138,0.194,0.395,0.3,0.61,1,0.498,0.557,1,0.685,0.159,0.079,0.024,-1,-1,-1,-1,-1,-1,0.593,0.453,0.185,0.161,0.5,0.155,0.51,1,0.34,0.815,0.496,0.311,0.352,0.834,0.5…	0.930339,0.949357,0.953775,0.686502,0.558866,0.940034,0.608002,0.088093,0.930108,0.999118,0.744540,0.548330,0.732293,0.984064,0.301168,0.140475,0.522143,0.240264,0.599370,0.360894,0.763805,0.268702,0.215705,0.962354,0.999644,0.779614,0.680293,0.745078,0.968138,0.984529,0.989794,0.873765,0.217065,0.227311,0.990206,0.170291,0.802368,0.477212,0.802725,0.987063,0.726333,0.052929,0.018541,0.519772,0.9…	101	123	1133	1355	na	na	0	na	na	0.878118	0.105488	1233	1255	410	1360	0	1	0	-1	0.865405	-1	FALSE
all	RACK1_A375_gRNA1316	A375	RACK1	CACACTCGCACCAGGTTGTCCGT	ACGGACAACCTGGTGCGAGTGTG	ENST00000512805	ACTGAAGCAAGAAGTTATCAGTACCAGCAGCAAGGCAGAACCACCCCAGTGCACCTCCCTGGCCTGGTCTGCTGATGGCCAGACTCTGTTTGCTGGCTACACGGACAACCTGGTGCGAGTGTGGCAGGTGACCATTGGCACACGCTAGAAGTTTATGGCAGAGCTTTACAAATAAAAAAAAAACTGGC	aacccctaccaactggtcggggtttgaaac	-14.6	((((((.(((....))).))))))...((((............))))......	-42.21	0.583,0.284,0.313,0.588,1,0.864,0.406,0.446,0.929,0.872,1,1,1,0.562,0.714,1,1,0.443,0.62,1,0.875,0.824,0.795,0.105,0.366,0.284,0.118,0.236,0.691,0.235,0.331,0.546,0.317,0.285,0.066,0.174,0.166,0.43,0.916,0.6,0.116,0.354,0.18,0.157,0.108,0.065,0.174,0.291,0.327,0.528,0.485,0.639,0.51,0.267,0.484,0.446,0.214,0.126,0.124,0.128,0.326,0.237,0.093,0.225,0.192,0.508,0.248,0.259,0.18,0.174,0.208,0.461,0.…	0.089542,0.923744,0.376175,0.704631,0.125794,0.433549,0.632611,0.693394,0.930279,0.978172,0.987633,0.360588,0.259637,0.730132,0.968643,0.165036,0.961422,0.429634,0.476892,0.012921,0.923593,0.324642,0.073393,0.872641,0.938409,0.147577,0.430754,0.065809,0.989258,0.375328,0.423911,0.947475,0.538556,0.290066,0.998597,0.205199,0.617716,0.908300,0.890164,0.923813,0.665843,0.563256,0.343533,0.130270,0.9…	101	123	1216	1403	na	na	0	na	na	0.937277	0.0463293	1316	1338	410	1360	0	1	0	-1	0.952681	-1	FALSE
all	RPS11_A375_gRNA226	A375	RPS11	GTAGGTGCCCTCAATAGCCTCCT	AGGAGGCTATTGAGGGCACCTAC	ENST00000270625	ACCATCTTTCAAAACAAGAAGAGGGTCCTGCTGGGAGAAACTGGCAAGGAGAAGCTCCCGCGGTACTACAAGAACATCGGTCTGGGCTTCAAGACACCCAAGGAGGCTATTGAGGGCACCTACATTGACAAGAAATGCCCCTTCACTGGTAATGTGTCCATTCGAGGGCGGATCCTCTCTGGCGTGGTGACCAAGATGAAGATGCAGAGGACCATTGTCATCC	aacccctaccaactggtcggggtttgaaac	-15.3	((((((.(((....))).))))))......(.((((..........)))).).	-38.43	0.113,0.014,0.088,0.036,0.018,0.03,0.095,0.142,0.112,0.207,0.531,0.987,1,0.75,0.671,0.743,0.854,0.362,0.342,0.204,0.188,0.094,0.116,0.102,0.105,0.05,0.048,0.051,0.076,0.019,0.092,0.356,0.064,0.122,0.251,0.191,0.421,0.718,0.839,0.438,0.187,0.178,0.379,0.465,0.462,1,0.509,0.507,1,0.661,0.69,0.825,0.579,0.312,0.117,0.115,0.176,0.12,0.422,0.229,0.279,0.324,0.472,0.756,0.554,0.611,1,0.684,0.842,1,0.85…	0.275687,0.304534,0.735315,0.507931,0.371134,0.877871,0.041534,0.454354,0.988716,0.996183,0.958514,0.893736,0.420605,0.806901,0.985076,0.558119,0.923681,0.473770,0.075104,0.028166,0.175724,0.619815,0.230521,0.956956,0.991675,0.864677,0.302230,0.049299,0.337891,0.153680,0.992212,0.808934,0.688663,0.559018,0.994613,0.317767,0.687871,0.916528,0.264192,0.153641,0.481078,0.750893,0.009483,0.083516,0.4…	101	123	126	348	na	na	0	na	na	0.36645	0.596091	226	248	84	557	0	1	0	-1	0.299578	-1	FALSE
all	RPS11_A375_gRNA331	A375	RPS11	TCGGCGGATGACAATGGTCCTCT	AGAGGACCATTGTCATCCGCCGA	ENST00000270625	GCTATTGAGGGCACCTACATTGACAAGAAATGCCCCTTCACTGGTAATGTGTCCATTCGAGGGCGGATCCTCTCTGGCGTGGTGACCAAGATGAAGATGCAGAGGACCATTGTCATCCGCCGAGACTATCTGCACTACATCCGCAAGTACAACCGCTTCGAGAAGCGCCACAAGAACATGTCTGTACACCTGTCCCCCTGCTTCAGGGACGTCCAGATCGGTG	aacccctaccaactggtcggggtttgaaac	-16.9	((((((.(((....))).))))))........((.((((.......)))).))	-38.97	0.357,0.226,0.282,0.419,0.34,0.329,0.416,0.294,0.088,0.109,0.114,0.143,0.173,0.11,0.222,0.483,0.235,0.53,0.606,0.358,0.624,1,0.68,0.664,1,0.714,0.688,0.941,1,0.716,0.509,0.017,0.065,0.047,0.096,0.294,0.694,0.665,0.773,0.853,0.522,0.451,0.995,1,1,1,1,1,0.824,0.977,0.824,0.598,0.173,0.551,0.932,1,-1,-1,-1,-1,-1,-1,-1,-1,-1,-1,-1,-1,-1,-1,-1,-1,-1,-1,-1,-1,0.06,0.154,0.242,0.563,0.135,0.074,0.119,0.…	0.067212,0.698045,0.960170,0.826824,0.640458,0.146524,0.079221,0.201537,0.983162,0.998816,0.547152,0.790810,0.165517,0.965347,0.820815,0.462847,0.716073,0.065423,0.051225,0.089580,0.351966,0.444608,0.188396,0.851735,0.999292,0.814716,0.232255,0.092847,0.456824,0.099224,0.783811,0.855708,0.087520,0.433059,0.828381,0.021856,0.546597,0.961820,0.590870,0.033651,0.192564,0.350633,0.473761,0.807872,0.3…	101	123	231	453	na	na	0	na	na	0.537459	0.425081	331	353	84	557	0	1	0	-1	0.521097	-1	FALSE
all	RPS11_A375_gRNA349	A375	RPS11	GATGTAGTGCAGATAGTCTCGGC	GCCGAGACTATCTGCACTACATC	ENST00000270625	ATTGACAAGAAATGCCCCTTCACTGGTAATGTGTCCATTCGAGGGCGGATCCTCTCTGGCGTGGTGACCAAGATGAAGATGCAGAGGACCATTGTCATCCGCCGAGACTATCTGCACTACATCCGCAAGTACAACCGCTTCGAGAAGCGCCACAAGAACATGTCTGTACACCTGTCCCCCTGCTTCAGGGACGTCCAGATCGGTGACATCGTCACAGTGGGCG	aacccctaccaactggtcggggtttgaaac	-14.2	((((((.(((....))).))))))(((.((..(((...)))....)).)))..	-40.45	0.606,0.358,0.624,1,0.68,0.664,1,0.714,0.688,0.941,1,0.716,0.509,0.017,0.065,0.047,0.096,0.294,0.694,0.665,0.773,0.853,0.522,0.451,0.995,1,1,1,1,1,0.824,0.977,0.824,0.598,0.173,0.551,0.932,1,-1,-1,-1,-1,-1,-1,-1,-1,-1,-1,-1,-1,-1,-1,-1,-1,-1,-1,-1,-1,0.06,0.154,0.242,0.563,0.135,0.074,0.119,0.246,0.216,0.289,0.67,1,0.773,0.769,0.895,0.615,0.868,1,0.651,0.819,1,1,0.782,0.999,1,1,0.803,0.99,1,1,0.2…	0.140003,0.311502,0.957018,0.496475,0.778989,0.030103,0.117257,0.062972,0.861441,0.999177,0.306488,0.599108,0.385913,0.973722,0.953542,0.520887,0.817564,0.046155,0.041220,0.057479,0.110941,0.418977,0.058022,0.835370,0.999729,0.963562,0.040450,0.313445,0.772993,0.048570,0.531813,0.314422,0.063042,0.110384,0.883006,0.012266,0.185609,0.882128,0.245924,0.006982,0.002540,0.329157,0.047393,0.212208,0.2…	101	123	249	471	na	na	0	na	na	0.566775	0.395765	349	371	84	557	0	1	0	-1	0.559072	-1	FALSE
all	RPS11_A375_gRNA364	A375	RPS11	GCGGTTGTACTTGCGGATGTAGT	ACTACATCCGCAAGTACAACCGC	ENST00000270625	CCCTTCACTGGTAATGTGTCCATTCGAGGGCGGATCCTCTCTGGCGTGGTGACCAAGATGAAGATGCAGAGGACCATTGTCATCCGCCGAGACTATCTGCACTACATCCGCAAGTACAACCGCTTCGAGAAGCGCCACAAGAACATGTCTGTACACCTGTCCCCCTGCTTCAGGGACGTCCAGATCGGTGACATCGTCACAGTGGGCGAGTGCCGGCCTCTGA	aacccctaccaactggtcggggtttgaaac	-17	((((((.(((....))).)))))).....(((((......)))))........	-39.87	0.047,0.096,0.294,0.694,0.665,0.773,0.853,0.522,0.451,0.995,1,1,1,1,1,0.824,0.977,0.824,0.598,0.173,0.551,0.932,1,-1,-1,-1,-1,-1,-1,-1,-1,-1,-1,-1,-1,-1,-1,-1,-1,-1,-1,-1,-1,0.06,0.154,0.242,0.563,0.135,0.074,0.119,0.246,0.216,0.289,0.67,1,0.773,0.769,0.895,0.615,0.868,1,0.651,0.819,1,1,0.782,0.999,1,1,0.803,0.99,1,1,0.247,0.834,0.998,0.8,1,0.205,0.062,0.246,0.097,0.062,0.034,0.066,0.059,0.024,0.…	0.153074,0.190091,0.940759,0.026632,0.764041,0.074161,0.025610,0.033358,0.765918,0.995830,0.607511,0.095503,0.373129,0.923861,0.884175,0.292766,0.378261,0.026814,0.018779,0.077308,0.092186,0.470596,0.088748,0.866299,0.976174,0.965535,0.028916,0.039742,0.639350,0.012011,0.784814,0.265682,0.008987,0.029452,0.659796,0.004763,0.036910,0.469228,0.048737,0.016080,0.000030,0.048628,0.092896,0.033790,0.1…	101	123	264	486	na	na	0	na	na	0.591205	0.371336	364	386	84	557	0	1	0	-1	0.590717	-1	FALSE
all	RPS11_A375_gRNA367	A375	RPS11	GAAGCGGTTGTACTTGCGGATGT	ACATCCGCAAGTACAACCGCTTC	ENST00000270625	TTCACTGGTAATGTGTCCATTCGAGGGCGGATCCTCTCTGGCGTGGTGACCAAGATGAAGATGCAGAGGACCATTGTCATCCGCCGAGACTATCTGCACTACATCCGCAAGTACAACCGCTTCGAGAAGCGCCACAAGAACATGTCTGTACACCTGTCCCCCTGCTTCAGGGACGTCCAGATCGGTGACATCGTCACAGTGGGCGAGTGCCGGCCTCTGAGCA	aacccctaccaactggtcggggtttgaaac	-14.4	((((((.(((....))).)))))).........((((......))))......	-39.42	0.694,0.665,0.773,0.853,0.522,0.451,0.995,1,1,1,1,1,0.824,0.977,0.824,0.598,0.173,0.551,0.932,1,-1,-1,-1,-1,-1,-1,-1,-1,-1,-1,-1,-1,-1,-1,-1,-1,-1,-1,-1,-1,0.06,0.154,0.242,0.563,0.135,0.074,0.119,0.246,0.216,0.289,0.67,1,0.773,0.769,0.895,0.615,0.868,1,0.651,0.819,1,1,0.782,0.999,1,1,0.803,0.99,1,1,0.247,0.834,0.998,0.8,1,0.205,0.062,0.246,0.097,0.062,0.034,0.066,0.059,0.024,0.088,0.152,0.123,0.…	0.102889,0.099655,0.965309,0.057653,0.644091,0.125505,0.030442,0.043497,0.875718,0.994761,0.633440,0.105212,0.141030,0.873549,0.869806,0.172692,0.284583,0.016137,0.020233,0.042096,0.076552,0.517094,0.096813,0.867707,0.980988,0.964707,0.035597,0.042501,0.647222,0.005891,0.746311,0.141855,0.008646,0.037140,0.458722,0.003376,0.036507,0.300773,0.049071,0.054706,0.000062,0.078528,0.059138,0.033032,0.0…	101	123	267	489	na	na	0	na	na	0.596091	0.36645	367	389	84	557	0	1	0	-1	0.597046	-1	FALSE
all	RPS11_A375_gRNA394	A375	RPS11	TACAGACATGTTCTTGTGGCGCT	AGCGCCACAAGAACATGTCTGTA	ENST00000270625	CGGATCCTCTCTGGCGTGGTGACCAAGATGAAGATGCAGAGGACCATTGTCATCCGCCGAGACTATCTGCACTACATCCGCAAGTACAACCGCTTCGAGAAGCGCCACAAGAACATGTCTGTACACCTGTCCCCCTGCTTCAGGGACGTCCAGATCGGTGACATCGTCACAGTGGGCGAGTGCCGGCCTCTGAGCAAGACAGTGCGCTTCAACGTGCTCAAGG	aacccctaccaactggtcggggtttgaaac	-16.9	((((((.(((....))).)))))).....((((((........))))))....	-38.66	-1,-1,-1,-1,-1,-1,-1,-1,-1,-1,-1,-1,-1,0.06,0.154,0.242,0.563,0.135,0.074,0.119,0.246,0.216,0.289,0.67,1,0.773,0.769,0.895,0.615,0.868,1,0.651,0.819,1,1,0.782,0.999,1,1,0.803,0.99,1,1,0.247,0.834,0.998,0.8,1,0.205,0.062,0.246,0.097,0.062,0.034,0.066,0.059,0.024,0.088,0.152,0.123,0.122,0.143,0.192,0.291,0.291,0.09,0.083,0.082,0.139,0.546,0.464,0.393,0.861,0.503,0.87,0.419,0.26,0.084,0.258,0.155,0.…	0.077683,0.244021,0.714578,0.001019,0.535285,0.027913,0.092270,0.012883,0.388784,0.953954,0.145245,0.026750,0.423329,0.240341,0.938489,0.003841,0.038694,0.025477,0.073626,0.015658,0.115142,0.495357,0.082942,0.885250,0.893970,0.893699,0.033278,0.029577,0.282560,0.095141,0.830330,0.098414,0.080941,0.034489,0.520289,0.005702,0.011190,0.826926,0.065403,0.004870,0.000137,0.021044,0.255885,0.004363,0.0…	101	123	294	516	na	na	0	na	na	0.640065	0.322476	394	416	84	557	0	1	0	-1	0.654008	-1	FALSE
all	NIFK_A375_gRNA213	A375	NIFK	GTTAGGTAGGTGGCGCACATAGA	TCTATGTGCGCCACCTACCTAAC	ENST00000285814	CTTAATCCGCAGGAAGATGTCGAGTTTCAAAAGGAGGTGGCGCAGGTTCGCAAGCGCATAACCCAGCGAAAAAAACAAGAACAACTTACTCCTGGAGTAGTCTATGTGCGCCACCTACCTAACCTACTTGACGAAACCCAGATCTTTTCATATTTCTCCCAGTTTGGCACTGTGACACGGTTCAGGCTGTCCAGAAGTAAAAGGACTGGAAATAGCAAAGGCT	aacccctaccaactggtcggggtttgaaac	-16	((((((.(((....))).)))))).....(((((......)))))........	-41.86	na	0.706697,0.024359,0.112825,0.317078,0.893924,0.246427,0.498207,0.697885,0.899528,0.699184,0.708978,0.011030,0.057760,0.915857,0.052791,0.770610,0.834701,0.408717,0.492672,0.826737,0.597627,0.811572,0.740269,0.766219,0.301178,0.758174,0.074960,0.861776,0.880970,0.769308,0.441669,0.683773,0.140786,0.138199,0.461019,0.830940,0.279119,0.133346,0.014235,0.601696,0.015564,0.032274,0.407876,0.049494,0.2…	101	123	113	335	na	na	0	na	na	0.122261	0.864475	213	235	74	952	0	1	0	-1	0.158134	-1	FALSE
all	NIFK_A375_gRNA328	A375	NIFK	ACTCCACAAATGCATAGCCTTTG	CAAAGGCTATGCATTTGTGGAGT	ENST00000285814	TACCTAACCTACTTGACGAAACCCAGATCTTTTCATATTTCTCCCAGTTTGGCACTGTGACACGGTTCAGGCTGTCCAGAAGTAAAAGGACTGGAAATAGCAAAGGCTATGCATTTGTGGAGTTTGAGTCTGAGGATGTTGCCAAAATAGTTGCTGAAACAATGAACAACTACCTGTTTGGTGAAAGACTCTTGGAGTGTCATTTTATGCCACCTGAAAAAGT	aacccctaccaactggtcggggtttgaaac	-14	((((((.(((....))).))))))............((((.((...)).))))	-36.01	na	0.676991,0.347562,0.319906,0.754896,0.909797,0.163568,0.762583,0.781073,0.854281,0.946331,0.777219,0.036776,0.317312,0.995175,0.312187,0.887754,0.757454,0.847726,0.875749,0.906856,0.968065,0.164078,0.559948,0.512484,0.845947,0.973295,0.164408,0.968085,0.993411,0.699387,0.995140,0.354840,0.441333,0.285769,0.831106,0.191523,0.715465,0.292118,0.086358,0.855262,0.057665,0.231490,0.209194,0.637707,0.4…	101	123	228	450	na	na	0	na	na	0.188581	0.798155	328	350	74	952	0	1	0	-1	0.288965	-1	FALSE
all	NIFK_A375_gRNA330	A375	NIFK	AAACTCCACAAATGCATAGCCTT	AAGGCTATGCATTTGTGGAGTTT	ENST00000285814	CCTAACCTACTTGACGAAACCCAGATCTTTTCATATTTCTCCCAGTTTGGCACTGTGACACGGTTCAGGCTGTCCAGAAGTAAAAGGACTGGAAATAGCAAAGGCTATGCATTTGTGGAGTTTGAGTCTGAGGATGTTGCCAAAATAGTTGCTGAAACAATGAACAACTACCTGTTTGGTGAAAGACTCTTGGAGTGTCATTTTATGCCACCTGAAAAAGTAC	aacccctaccaactggtcggggtttgaaac	-12.8	((((((.(((....))).)))))).............................	-34.77	na	0.574342,0.305457,0.306409,0.880598,0.925597,0.147262,0.785578,0.771307,0.841385,0.958693,0.839044,0.020337,0.182804,0.995918,0.510944,0.876993,0.743441,0.857435,0.897166,0.924847,0.972995,0.158715,0.508751,0.495378,0.880175,0.963943,0.168118,0.953500,0.991089,0.670539,0.986323,0.354909,0.439894,0.287028,0.852187,0.244273,0.743470,0.275137,0.077267,0.942203,0.056869,0.258515,0.246008,0.481397,0.4…	101	123	230	452	na	na	0	na	na	0.189735	0.797001	330	352	74	952	0	1	0	-1	0.29124	-1	FALSE
all	NIFK_A375_gRNA737	A375	NIFK	TCCACAGTCTTCTCAGGAGTGTC	GACACTCCTGAGAAGACTGTGGA	ENST00000285814	GATTTTACAGAAAACGGAAAGTATTTCAAAAACTAATCGTCAGACGTCTACAAAAGGCCAGGTTTTACGTAAGAAGAAGAAAAAAGTTTCAGGTACTCTTGACACTCCTGAGAAGACTGTGGATAGCCAGGGCCCCACACCAGTTTGTACACCAACATTTTTGGAGAGGCGAAAATCTCAAGTGGCTGAACTGAATGATGATGATAAAGATGATGAAATAGTT	aacccctaccaactggtcggggtttgaaac	-19.5	((((((.(((....))).))))))....(((((..((....))..)))))...	-37.59	na	0.628627,0.021378,0.296269,0.786035,0.609374,0.609655,0.140470,0.247788,0.875351,0.985482,0.407050,0.025318,0.423282,0.970065,0.873014,0.960374,0.855606,0.715360,0.668242,0.968072,0.789399,0.517034,0.483266,0.403302,0.985839,0.719876,0.451126,0.897064,0.603285,0.854368,0.934055,0.428151,0.253240,0.104215,0.563049,0.536734,0.377227,0.213592,0.022259,0.120948,0.102767,0.024404,0.111187,0.405710,0.6…	101	123	637	859	na	na	0	na	na	0.424452	0.562284	737	759	74	952	0	1	0	-1	0.754266	-1	FALSE
all	NIFK_A375_gRNA738	A375	NIFK	ATCCACAGTCTTCTCAGGAGTGT	ACACTCCTGAGAAGACTGTGGAT	ENST00000285814	ATTTTACAGAAAACGGAAAGTATTTCAAAAACTAATCGTCAGACGTCTACAAAAGGCCAGGTTTTACGTAAGAAGAAGAAAAAAGTTTCAGGTACTCTTGACACTCCTGAGAAGACTGTGGATAGCCAGGGCCCCACACCAGTTTGTACACCAACATTTTTGGAGAGGCGAAAATCTCAAGTGGCTGAACTGAATGATGATGATAAAGATGATGAAATAGTTT	aacccctaccaactggtcggggtttgaaac	-16.8	((((((.(((....))).))))))..........(((.((((...)))).)))	-35.66	na	0.709990,0.021938,0.338743,0.824011,0.645990,0.569357,0.159663,0.245817,0.841351,0.959185,0.338854,0.015745,0.388079,0.977481,0.897289,0.962690,0.856100,0.765350,0.732782,0.974046,0.820845,0.469688,0.491000,0.423516,0.983093,0.665122,0.450036,0.907794,0.667950,0.875412,0.815812,0.593992,0.194446,0.102305,0.579781,0.584732,0.495505,0.161357,0.025245,0.189740,0.056244,0.026013,0.172548,0.400877,0.7…	101	123	638	860	na	na	0	na	na	0.425029	0.561707	738	760	74	952	0	1	0	-1	0.755404	-1	FALSE
all	NIFK_A375_gRNA817	A375	NIFK	CATCATCATTCAGTTCAGCCACT	AGTGGCTGAACTGAATGATGATG	ENST00000285814	AAAAAGTTTCAGGTACTCTTGACACTCCTGAGAAGACTGTGGATAGCCAGGGCCCCACACCAGTTTGTACACCAACATTTTTGGAGAGGCGAAAATCTCAAGTGGCTGAACTGAATGATGATGATAAAGATGATGAAATAGTTTTCAAACAGCCCATATCCTGTGTAAAAGAAGAAATACAAGAGACTCAAACACCTACACATTCACGGAAAAAAAGACGAAG	aacccctaccaactggtcggggtttgaaac	-12.8	((((((.(((....))).)))))).............................	-39.05	na	0.818229,0.296306,0.109783,0.964932,0.548926,0.017634,0.581814,0.405486,0.867916,0.997117,0.655995,0.203164,0.941616,0.991905,0.932888,0.993004,0.911520,0.878611,0.738076,0.944186,0.725218,0.679281,0.775598,0.620991,0.997475,0.967590,0.752900,0.914916,0.990876,0.963902,0.998705,0.251686,0.037910,0.068575,0.407856,0.805841,0.151174,0.361598,0.028583,0.430833,0.036749,0.146319,0.422661,0.214646,0.7…	101	123	717	939	na	na	0	na	na	0.470588	0.516148	817	839	74	952	0	1	0	-1	0.845279	-1	FALSE
all	UTP4_A375_gRNA218	A375	UTP4	ACAGCGGATTCCTGATGGAACAT	ATGTTCCATCAGGAATCCGCTGT	ENST00000314423	GCACGTGGGGCCGGGGCGGAGAGAGGCGAGCACCGGGAAGGGGAGCGTGGGGCCGCTGGAATGGGTGAATTTAAGGTCCATCGAGTACGTTTCTTTAATTATGTTCCATCAGGAATCCGCTGTGTGGCTTACAATAACCAGTCAAACAGATTGGCTGTTTCACGAACAGATGGCACTGTGGAAATTTATAACTTGTCAGCAAACTACTTTCAGGAGAAATTTT	aacccctaccaactggtcggggtttgaaac	-16	((((((.(((....))).))))))..............((((....))))...	-34.51	-1,-1,-1,-1,-1,-1,-1,-1,-1,-1,-1,-1,-1,-1,-1,-1,-1,-1,-1,-1,-1,-1,-1,-1,-1,-1,-1,-1,-1,-1,-1,-1,-1,-1,-1,-1,-1,-1,-1,-1,-1,-1,-1,-1,-1,-1,-1,-1,-1,-1,-1,-1,-1,-1,-1,-1,-1,-1,0.222,0.111,0.111,0,0,0,0.111,0.111,0.444,0,0.111,0,0.111,0.556,0.333,0,0,0.111,0.222,0.111,0,0.111,-1,-1,-1,-1,-1,-1,-1,-1,-1,-1,-1,-1,-1,-1,-1,-1,-1,-1,-1,-1,-1,-1,-1,-1,-1,-1,-1,-1,-1,-1,-1,-1,-1,-1,-1,-1,-1,-1,-1,-1,-1,-1…	0.173119,0.306680,0.143258,0.157910,0.123793,0.203259,0.037336,0.565123,0.499162,0.846788,0.606981,0.014589,0.005924,0.778708,0.521939,0.025156,0.194784,0.375528,0.259109,0.126701,0.889737,0.861482,0.578242,0.743449,0.030414,0.080828,0.172849,0.916631,0.442419,0.008018,0.081432,0.022011,0.075506,0.031488,0.190197,0.024679,0.050652,0.042691,0.070866,0.055735,0.107525,0.013789,0.273432,0.065690,0.2…	101	123	118	340	na	na	0	na	na	0.0934539	0.896641	218	240	178	2235	0	1	0	-1	0.0194363	-1	FALSE
all	UTP4_A375_gRNA308	A375	UTP4	CTGAAAGTAGTTTGCTGACAAGT	ACTTGTCAGCAAACTACTTTCAG	ENST00000314423	TTCTTTAATTATGTTCCATCAGGAATCCGCTGTGTGGCTTACAATAACCAGTCAAACAGATTGGCTGTTTCACGAACAGATGGCACTGTGGAAATTTATAACTTGTCAGCAAACTACTTTCAGGAGAAATTTTTCCCAGGTCATGAGTCTCGGGCTACAGAAGCTTTGTGCTGGGCAGAAGGACAGCGACTCTTTAGTGCTGGGCTCAATGGCGAGATTATGG	aacccctaccaactggtcggggtttgaaac	-14.3	((((((.(((....))).))))))....((.((..((((...))))..)).))	-34.75	-1,-1,-1,-1,-1,-1,-1,-1,-1,-1,-1,-1,-1,-1,-1,-1,-1,-1,-1,-1,-1,-1,-1,-1,-1,-1,-1,-1,-1,-1,-1,-1,-1,-1,-1,-1,-1,-1,-1,-1,-1,-1,-1,-1,1,1,0.678,0,0.226,0.113,0,0,0.226,0.113,0.339,0.452,0.339,0.452,0.565,0.113,0.113,0.226,0,0,0,0,0.113,0.452,0.565,1,0.113,0.226,0.226,1,0.904,0.791,0.791,0.565,0.339,0.565,0.113,0.565,0.339,0.452,0.339,0.113,0.339,0.113,0.452,0.113,0.113,0.565,0.678,0.339,0.339,0.452…	0.815140,0.057783,0.513093,0.279967,0.965559,0.848965,0.013747,0.271868,0.012976,0.759797,0.431174,0.000387,0.003583,0.962608,0.304133,0.009998,0.563063,0.572341,0.150511,0.107804,0.890353,0.845983,0.214061,0.962891,0.023489,0.908276,0.314625,0.812420,0.178380,0.067092,0.637393,0.000234,0.080203,0.077851,0.707284,0.022948,0.030190,0.008655,0.041455,0.198635,0.001512,0.145921,0.278878,0.016260,0.4…	101	123	208	430	na	na	0	na	na	0.132214	0.857881	308	330	178	2235	0	1	0	-1	0.0631681	-1	FALSE
all	UTP4_A375_gRNA615	A375	UTP4	GCCAGCTGAGACTCAGGATGCGA	TCGCATCCTGAGTCTCAGCTGGC	ENST00000314423	GCTCTCAACTTTTGGTTGGTTGTGAAGATGGATCTGTGAAACTATTTCAAATTACCCCAGACAAAATCCAGTTTGAAAGAAATTTTGATCGGCAGAAAAGTCGCATCCTGAGTCTCAGCTGGCATCCCTCTGGTACCCACATTGCAGCTGGTTCCATAGACTACATTAGTGTGTTTGATGTCAAATCAGGCAGCGCTGTTCATAAGATGATTGTGGACAGGCA	aacccctaccaactggtcggggtttgaaac	-19.4	((((((.(((....))).)))))).....(((...((((...))))...))).	-40.31	0.127,0.255,0.127,0.382,0.641,0.128,0.384,0.384,0.128,0.387,0.645,0.516,0,0,-1,-1,-1,-1,-1,-1,-1,-1,-1,-1,-1,-1,-1,-1,-1,-1,-1,-1,-1,-1,-1,-1,-1,-1,-1,-1,-1,-1,-1,-1,-1,-1,-1,-1,-1,-1,-1,-1,-1,-1,-1,-1,-1,-1,-1,-1,-1,-1,-1,-1,-1,-1,-1,-1,-1,-1,-1,-1,-1,-1,-1,-1,-1,-1,-1,-1,-1,-1,-1,-1,-1,-1,-1,-1,-1,-1,-1,-1,-1,-1,-1,-1,-1,-1,-1,-1,-1,-1,-1,-1,-1,-1,-1,-1,-1,-1,-1,-1,-1,-1,-1,-1,-1,-1,-1,-1,-1,-1…	0.734993,0.240111,0.373440,0.126333,0.605197,0.503403,0.553714,0.792528,0.807013,0.433893,0.130738,0.652037,0.081138,0.950067,0.302065,0.000089,0.014863,0.563072,0.621844,0.965850,0.878030,0.989201,0.542939,0.944885,0.648851,0.027836,0.529823,0.833508,0.873755,0.233856,0.123234,0.113608,0.414935,0.123530,0.596399,0.044014,0.221034,0.287635,0.718794,0.000004,0.406300,0.056385,0.355115,0.068812,0.4…	101	123	515	737	na	na	0	na	na	0.264427	0.725668	615	637	178	2235	0	1	0	-1	0.212342	-1	FALSE
all	UTP4_A375_gRNA1603	A375	UTP4	GTTCCTGACTGAGGCTGGAAAGC	GCTTTCCAGCCTCAGTCAGGAAC	ENST00000314423	GATTTTGTTTTCTGAAGATTCAACAAAGCTCTTTGTAGCATCAAATCAAGGAGCTCTGCATATTGTTCAGCTGTCAGGAGGAAGCTTCAAGCACCTGCATGCTTTCCAGCCTCAGTCAGGAACAGTGGAGGCCATGTGTCTTTTGGCAGTCAGTCCAGATGGGAATTGGCTAGCTGCATCAGGTACCAGTGCTGGAGTCCATGTCTACAACGTAAAACAGCTA	aacccctaccaactggtcggggtttgaaac	-15.2	((((((.(((....))).)))))).......((((...........))))...	-40.3	-1,-1,-1,-1,-1,-1,-1,-1,-1,-1,-1,-1,-1,-1,-1,-1,-1,-1,-1,-1,-1,-1,-1,-1,-1,1,0.244,0,0,0,0,0.081,0.081,0.325,0.244,0.325,0.244,0.569,0.244,1,0.569,0.325,1,0.651,1,0.163,0.488,0.732,0.163,0,0.081,0.163,0,0.081,0.407,0.976,0.813,0.407,0.081,0.976,0.569,0.651,0.651,1,0.325,1,0.488,0.976,1,0.244,0.163,0.325,0.325,0.244,0.651,0.813,0.407,0.652,0.571,0,0.245,0.489,0.735,0,0.082,0.082,0,0.327,0.491,0.57…	0.352286,0.615857,0.481650,0.013678,0.314750,0.980042,0.082718,0.802311,0.608721,0.806543,0.982410,0.016040,0.826823,0.584753,0.322566,0.219054,0.076350,0.349163,0.131302,0.434405,0.756899,0.296317,0.442765,0.783694,0.036829,0.568013,0.747373,0.152293,0.814008,0.320072,0.000061,0.295421,0.696906,0.194325,0.919979,0.054522,0.511092,0.028278,0.052731,0.454776,0.002703,0.411476,0.145889,0.005938,0.9…	101	123	1503	1725	na	na	0	na	na	0.689922	0.300172	1603	1625	178	2235	0	1	0	-1	0.69242	-1	FALSE
all	UTP4_A375_gRNA1738	A375	UTP4	GGGAAATTGTAAGCAGGCACCGT	ACGGTGCCTGCTTACAATTTCCC	ENST00000314423	GTGTCTTTTGGCAGTCAGTCCAGATGGGAATTGGCTAGCTGCATCAGGTACCAGTGCTGGAGTCCATGTCTACAACGTAAAACAGCTAAAGCTTCACTGCACGGTGCCTGCTTACAATTTCCCAGTGACTGCTATGGCTATTGCCCCCAATACCAACAACCTTGTCATCGCTCATTCGGACCAGCAGGTATTTGAGTACAGCATCCCAGACAAACAGTATACA	aacccctaccaactggtcggggtttgaaac	-17.3	((((((.(((....))).))))))....((((....(((....)))...))))	-40.27	0.451,0.789,0.338,0.451,0.564,0.62,0.733,-1,-1,-1,-1,-1,-1,-1,-1,-1,-1,-1,-1,-1,-1,-1,-1,-1,-1,-1,-1,-1,-1,-1,-1,-1,-1,-1,-1,-1,-1,-1,-1,-1,-1,-1,-1,-1,-1,-1,-1,-1,-1,-1,-1,-1,-1,-1,-1,-1,-1,-1,-1,-1,-1,-1,-1,-1,-1,-1,-1,-1,-1,-1,-1,-1,-1,-1,-1,-1,-1,-1,-1,-1,-1,-1,-1,-1,-1,-1,-1,-1,-1,-1,-1,-1,-1,-1,-1,-1,-1,-1,-1,-1,-1,-1,-1,-1,-1,-1,-1,-1,-1,-1,-1,-1,-1,-1,-1,-1,-1,-1,-1,-1,-1,-1,-1,-1,-1,-1,-…	0.914995,0.573462,0.697488,0.086974,0.693942,0.379399,0.311913,0.854380,0.835185,0.713717,0.195107,0.734437,0.010797,0.954948,0.149730,0.000063,0.172924,0.583950,0.759810,0.909229,0.901252,0.997333,0.581778,0.955724,0.660145,0.280998,0.164427,0.862943,0.869962,0.518975,0.130584,0.383678,0.393125,0.226271,0.840917,0.162205,0.097459,0.634631,0.537233,0.000227,0.432520,0.212062,0.394336,0.033141,0.3…	101	123	1638	1860	na	na	0	na	na	0.748062	0.242033	1738	1760	178	2235	0	1	0	-1	0.758017	-1	FALSE
all	UTP4_A375_gRNA1739	A375	UTP4	TGGGAAATTGTAAGCAGGCACCG	CGGTGCCTGCTTACAATTTCCCA	ENST00000314423	TGTCTTTTGGCAGTCAGTCCAGATGGGAATTGGCTAGCTGCATCAGGTACCAGTGCTGGAGTCCATGTCTACAACGTAAAACAGCTAAAGCTTCACTGCACGGTGCCTGCTTACAATTTCCCAGTGACTGCTATGGCTATTGCCCCCAATACCAACAACCTTGTCATCGCTCATTCGGACCAGCAGGTATTTGAGTACAGCATCCCAGACAAACAGTATACAG	aacccctaccaactggtcggggtttgaaac	-14.4	((((((.(((....))).)))))).......((....(((....)))...)).	-40.14	0.789,0.338,0.451,0.564,0.62,0.733,-1,-1,-1,-1,-1,-1,-1,-1,-1,-1,-1,-1,-1,-1,-1,-1,-1,-1,-1,-1,-1,-1,-1,-1,-1,-1,-1,-1,-1,-1,-1,-1,-1,-1,-1,-1,-1,-1,-1,-1,-1,-1,-1,-1,-1,-1,-1,-1,-1,-1,-1,-1,-1,-1,-1,-1,-1,-1,-1,-1,-1,-1,-1,-1,-1,-1,-1,-1,-1,-1,-1,-1,-1,-1,-1,-1,-1,-1,-1,-1,-1,-1,-1,-1,-1,-1,-1,-1,-1,-1,-1,-1,-1,-1,-1,-1,-1,-1,-1,-1,-1,-1,-1,-1,-1,-1,-1,-1,-1,-1,-1,-1,-1,-1,-1,-1,-1,-1,-1,-1,-1,-…	0.884573,0.550320,0.707722,0.063489,0.655713,0.370404,0.397783,0.855012,0.805495,0.697918,0.185353,0.754571,0.008976,0.940939,0.109175,0.000048,0.189551,0.595563,0.699903,0.907433,0.897695,0.997664,0.413788,0.951097,0.539533,0.268243,0.218068,0.830787,0.897651,0.503386,0.118540,0.404659,0.341051,0.216349,0.746332,0.172263,0.080012,0.653216,0.510377,0.000489,0.498516,0.167759,0.430671,0.034103,0.4…	101	123	1639	1861	na	na	0	na	na	0.748493	0.241602	1739	1761	178	2235	0	1	0	-1	0.758503	-1	FALSE
all	BUB1B_A375_gRNA472	A375	BUB1B	GTTGACATATTACTCTCCTTCCC	GGGAAGGAGAGTAATATGTCAAC	ENST00000287598	ACGGGCATTTGAATATGAAATTCGATTTTACACTGGAAATGACCCTCTGGATGTTTGGGATAGGTATATCAGCTGGACAGAGCAGAACTATCCTCAAGGTGGGAAGGAGAGTAATATGTCAACGTTATTAGAAAGAGCTGTAGAAGCACTACAAGGAGAAAAACGATATTATAGTGATCCTCGATTTCTCAATCTCTGGCTTAAATTAGGGCGTTTATGCAAT	aacccctaccaactggtcggggtttgaaac	-12.8	((((((.(((....))).)))))).............................	-39.11	na	0.843463,0.082656,0.018635,0.971539,0.851037,0.135950,0.938719,0.406744,0.985705,0.984371,0.557117,0.032720,0.814523,0.988721,0.817752,0.967088,0.942113,0.795702,0.777853,0.920971,0.607651,0.212331,0.606468,0.792287,0.977844,0.993371,0.565403,0.990287,0.991698,0.953167,0.973768,0.782780,0.290754,0.220057,0.694230,0.795553,0.092878,0.291778,0.046155,0.310011,0.456023,0.401008,0.622693,0.528293,0.3…	101	123	372	594	na	na	0	na	na	0.126443	0.867383	472	494	196	3345	0	1	0	-1	0.087619	-1	FALSE
all	BUB1B_A375_gRNA666	A375	BUB1B	TAGCTTCATATTCTTCTGCCCAT	ATGGGCAGAAGAATATGAAGCTA	ENST00000287598	TCTGGCTTAAATTAGGGCGTTTATGCAATGAGCCTTTGGATATGTACAGTTACTTGCACAACCAAGGGATTGGTGTTTCACTTGCTCAGTTCTATATCTCATGGGCAGAAGAATATGAAGCTAGAGAAAACTTTAGGAAAGCAGATGCGATATTTCAGGAAGGGATTCAACAGAAGGCTGAACCACTAGAAAGACTACAGTCCCAGCACCGACAATTCCAAGC	aacccctaccaactggtcggggtttgaaac	-13.6	((((((.(((....))).))))))((((......))))...............	-37.31	na	0.784803,0.068156,0.043415,0.794598,0.717565,0.446317,0.781484,0.827292,0.434880,0.976245,0.830984,0.004325,0.101327,0.990930,0.214238,0.943150,0.899660,0.518210,0.861721,0.944064,0.889919,0.242781,0.862215,0.762868,0.904627,0.973493,0.385743,0.939560,0.954492,0.431480,0.974621,0.301236,0.294803,0.253834,0.177020,0.764552,0.681003,0.194048,0.006358,0.121638,0.154331,0.791043,0.389114,0.458591,0.4…	101	123	566	788	na	na	0	na	na	0.178523	0.815302	666	688	196	3345	0	1	0	-1	0.149206	-1	FALSE
all	BUB1B_A375_gRNA762	A375	BUB1B	GGAATTGTCGGTGCTGGGACTGT	ACAGTCCCAGCACCGACAATTCC	ENST00000287598	TCTCATGGGCAGAAGAATATGAAGCTAGAGAAAACTTTAGGAAAGCAGATGCGATATTTCAGGAAGGGATTCAACAGAAGGCTGAACCACTAGAAAGACTACAGTCCCAGCACCGACAATTCCAAGCTCGAGTGTCTCGGCAAACTCTGTTGGCACTTGAGAAAGAAGAAGAGGAGGAAGTTTTTGAGTCTTCTGTACCACAACGAAGCACACTAGCTGAACT	aacccctaccaactggtcggggtttgaaac	-15.5	((((((.(((....))).))))))............(((........)))...	-41	na	0.530033,0.014562,0.126102,0.159164,0.671014,0.131430,0.143396,0.441262,0.872153,0.864238,0.325787,0.019665,0.238194,0.913041,0.496327,0.941829,0.927006,0.586027,0.249396,0.691159,0.697077,0.137093,0.407372,0.427250,0.974896,0.661127,0.180445,0.750992,0.891928,0.593675,0.989212,0.291727,0.136227,0.025235,0.148592,0.792097,0.221317,0.370974,0.006086,0.131994,0.069118,0.329554,0.375810,0.082322,0.2…	101	123	662	884	na	na	0	na	na	0.204295	0.78953	762	784	196	3345	0	1	0	-1	0.179683	-1	FALSE
all	BUB1B_A375_gRNA2032	A375	BUB1B	GTGGATACAAAACGAGCTGCTCT	AGAGCAGCTCGTTTTGTATCCAC	ENST00000287598	TGAATTTACAGGAATTGAACCCTTGAGCGAGGATGCCATTATCACAGGCTTCAGAAATGTAACAATTTGTCCTAACCCAGAAGACACTTGTGACTTTGCCAGAGCAGCTCGTTTTGTATCCACTCCTTTTCATGAGATAATGTCCTTGAAGGATCTCCCTTCTGATCCTGAGAGACTGTTACCGGAAGAAGATCTAGATGTAAAGACCTCTGAGGACCAGCAG	aacccctaccaactggtcggggtttgaaac	-13.6	((((((.(((....))).)))))).....(((.........))).........	-38.41	na	0.109018,0.080685,0.047268,0.284137,0.720553,0.400547,0.082999,0.586963,0.718349,0.787156,0.838045,0.005285,0.060897,0.978974,0.144451,0.958413,0.901442,0.351836,0.518271,0.748357,0.906076,0.295995,0.799923,0.965165,0.166602,0.911968,0.542424,0.902116,0.989510,0.457193,0.899547,0.007173,0.180071,0.121136,0.976363,0.530235,0.509410,0.074494,0.062963,0.511283,0.017496,0.006079,0.189045,0.041902,0.2…	101	123	1932	2154	na	na	0	na	na	0.545235	0.448591	2032	2054	196	3345	0	1	0	-1	0.582857	-1	FALSE
all	BUB1B_A375_gRNA2389	A375	BUB1B	GCACTTAACTCTGGTAGGGACTT	AAGTCCCTACCAGAGTTAAGTGC	ENST00000287598	CAAATGTCTTCAAATTCCTGAGAAACTAGAACTTACTAATGAGACTTCAGAAAACCCTACTCAGTCACCATGGTGTTCACAGTATCGCAGACAGCTACTGAAGTCCCTACCAGAGTTAAGTGCCTCTGCAGAGTTGTGTATAGAAGACAGACCAATGCCTAAGTTGGAAATTGAGAAGGAAATTGAATTAGGTAATGAGGATTACTGCATTAAACGAGAATAC	aacccctaccaactggtcggggtttgaaac	-16.5	...((((((((...(((.(((((.......)).))).))).))))))))....	-40.18	na	0.313482,0.125561,0.099732,0.403145,0.222644,0.308463,0.081997,0.561308,0.529990,0.979080,0.820844,0.031182,0.697631,0.934958,0.321295,0.910020,0.807772,0.326864,0.178584,0.786827,0.848512,0.322670,0.511237,0.474903,0.531774,0.976750,0.104710,0.708643,0.798564,0.820649,0.915105,0.582234,0.071409,0.059793,0.550656,0.888840,0.387501,0.117952,0.005042,0.134016,0.010347,0.400201,0.483390,0.498549,0.5…	101	123	2289	2511	na	na	0	na	na	0.641074	0.352752	2389	2411	196	3345	0	1	0	-1	0.69619	-1	FALSE
all	BUB1B_A375_gRNA2803	A375	BUB1B	TCTGCTTTGTGTAGCATCTCCAC	GTGGAGATGCTACACAAAGCAGA	ENST00000287598	CCAATATATAAACTGCTTCACCCTTCAGGATCTTCTCCAACACAGTGAATATATTACCCATGAAATAACAGTGTTGATTATTTATAACCTTTTGACAATAGTGGAGATGCTACACAAAGCAGAAATAGTCCATGGTGACTTGAGTCCAAGGTGTCTGATTCTCAGAAACAGAATCCACGATCCCTATGATTGTAACAAGAACAATCAAGCTTTGAAGATAGTG	aacccctaccaactggtcggggtttgaaac	-16.2	((((((.(((....))).))))))........((((......)))).......	-35.24	na	0.659719,0.105547,0.086611,0.739632,0.771621,0.165318,0.479636,0.620146,0.789692,0.977945,0.695355,0.052168,0.081588,0.983261,0.171478,0.841278,0.830570,0.620916,0.679369,0.967939,0.982220,0.311266,0.931144,0.759471,0.893047,0.962575,0.261043,0.977917,0.976612,0.645482,0.957976,0.144329,0.177850,0.032557,0.892051,0.594687,0.846469,0.393264,0.074077,0.234990,0.094800,0.021322,0.508192,0.205526,0.1…	101	123	2703	2925	na	na	0	na	na	0.752215	0.241611	2803	2825	196	3345	0	1	0	-1	0.827619	-1	FALSE
all	SNRNP200_A375_gRNA1625	A375	SNRNP200	TTTCCCAATCTCTCGGAGCATGC	GCATGCTCCGAGAGATTGGGAAA	ENST00000323853	CGGATCCAGAGTAAGCTCTACCGTGCTGCCCTTGAGACGGATGAGAATCTGCTGCTGTGTGCTCCTACTGGTGCTGGGAAGACCAACGTGGCCCTGATGTGCATGCTCCGAGAGATTGGGAAACACATAAACATGGACGGCACCATCAATGTGGATGACTTCAAGATTATCTACATTGCCCCCATGCGCTCCTTGGTGCAGGAGATGGTGGGCAGCTTTGGAA	aacccctaccaactggtcggggtttgaaac	-14	((((((.(((....))).)))))).......((((.........)))).....	-38.02	0.08,0.241,0.642,0.161,0,0.161,0.401,0.241,0.161,0.321,0.08,0.321,0.401,0.241,0.161,0.161,0.08,0,0.722,0.963,0.161,0.161,0.401,0.161,0.401,0.161,0.321,0.482,0,0,0.241,0.241,0.482,0.963,0.883,1,0.801,0.16,0.481,0.721,0.481,0.8,0.8,0.4,1,1,1,0.321,0.401,0.561,0.16,0.161,0.482,0.803,0.241,0.562,0.563,0.483,0.644,0.724,0.483,0.646,0.081,0,0,0.484,0.567,0.162,0,0.38,0.19,0.57,0.38,0.38,0.378,0.189,0.3…	0.067538,0.477397,0.323087,0.316952,0.465038,0.137451,0.170389,0.023962,0.006365,0.985785,0.393893,0.011420,0.466348,0.982515,0.971756,0.209868,0.003557,0.066513,0.083590,0.031246,0.677237,0.427477,0.031438,0.718643,0.054974,0.337077,0.394125,0.206476,0.197734,0.981886,0.163706,0.026000,0.169515,0.016393,0.065890,0.001354,0.000817,0.021786,0.001469,0.561840,0.136462,0.011841,0.685832,0.031685,0.6…	101	123	1525	1747	na	na	0	na	na	0.226657	0.770133	1625	1647	79	6486	0	1	0	-1	0.241261	-1	FALSE
all	SNRNP200_A375_gRNA1818	A375	SNRNP200	AGACGATGATCTGAGTGGCACTG	CAGTGCCACTCAGATCATCGTCT	ENST00000323853	TGGTGCAGGAGATGGTGGGCAGCTTTGGAAAGCGCCTGGCCACTTATGGCATCACTGTTGCTGAACTGACTGGGGACCACCAGCTGTGCAAAGAAGAGATCAGTGCCACTCAGATCATCGTCTGCACCCCCGAGAAGTGGGACATCATCACCCGCAAGGGTGGTGAGCGCACCTACACCCAGCTGGTGCGGCTCATCATTCTGGATGAGATTCATCTTCTCCA	aacccctaccaactggtcggggtttgaaac	-15.2	((((((.(((....))).)))))).....((((......))))..........	-42.67	0,0.3,0.2,0.501,0.4,0.701,0.1,0.4,0.1,0.1,0.1,0.601,0.1,0,0.1,0.801,0,0,0.3,0.2,1,0.1,0,0.2,0.501,0.2,0.801,0.501,1,1,0.3,0,0.188,0.423,0,0.188,0.047,0.329,0,0.047,0.047,0.047,0.094,0.517,0.47,0.282,0.094,0.141,0.094,0.141,0.376,0.376,0.423,0.376,0.282,0.282,0.705,0.329,0.611,0.611,0.282,0.376,0.974,1,0.974,0,0.47,0.658,1,0.845,0.799,0.329,0.094,0.094,0.752,0.845,0.329,0.47,0.188,0,0.141,0.188,0.…	0.272048,0.112471,0.878812,0.026816,0.244034,0.071346,0.007199,0.004734,0.043829,0.971429,0.046895,0.006176,0.412889,0.539117,0.981580,0.217292,0.499150,0.040064,0.146084,0.035048,0.862294,0.337880,0.014915,0.769069,0.734140,0.394477,0.187686,0.004288,0.087305,0.399076,0.010247,0.028228,0.034670,0.006411,0.017205,0.001428,0.018963,0.265805,0.013395,0.042908,0.003394,0.151963,0.011067,0.014865,0.7…	101	123	1718	1940	na	na	0	na	na	0.253594	0.743196	1818	1840	79	6486	0	1	0	-1	0.27138	-1	FALSE
all	SNRNP200_A375_gRNA4020	A375	SNRNP200	GGTAAAGACTCTCAAAGGCACTG	CAGTGCCTTTGAGAGTCTTTACC	ENST00000323853	AGCTGCCTGTCTCCTTCCGGCACCTGATCTTGCCGGAGAAGTACCCCCCTCCAACCGAACTTTTGGACCTGCAGCCCTTGCCCGTGTCTGCTCTGAGAAACAGTGCCTTTGAGAGTCTTTACCAAGATAAATTTCCTTTCTTCAATCCCATCCAGACCCAGGTGTTTAACACTGTATACAACAGTGACGACAACGTGTTTGTGGGGGCCCCCACGGGCAGCGG	aacccctaccaactggtcggggtttgaaac	-13.9	.(((((.(((....))).)))))((((...(((....))).))))........	-40.49	0.092,0.092,0.321,0.641,0.275,0.229,0.367,0.504,0.412,0.458,1,0.092,0.229,0.275,0.367,0.504,0,0.183,0,0.046,0.046,0.137,0.183,0.046,0.275,0.87,1,0.458,0.275,0.321,0.733,0.641,0.092,0,0,0.137,0.229,0.092,0.275,0.229,0.458,0.55,0.137,0,0,0,0,0,0.046,0.321,0.046,0.55,0.596,0.687,0.046,0.183,0.641,0.367,0.412,0.137,0.458,0.504,0.367,0.229,0.641,1,0.412,0.046,0.137,0.183,0.183,0.367,0.55,0.412,0.229,0…	0.246674,0.521912,0.126991,0.018927,0.354435,0.915087,0.030641,0.102716,0.484883,0.402197,0.521564,0.032332,0.004447,0.319001,0.035452,0.013958,0.002933,0.048241,0.259601,0.027786,0.666200,0.938774,0.749484,0.902639,0.001543,0.465805,0.206262,0.183109,0.510147,0.065515,0.107596,0.010642,0.835046,0.160652,0.978623,0.111217,0.075166,0.104497,0.058501,0.146279,0.111444,0.029079,0.106561,0.300108,0.0…	101	123	3920	4142	na	na	0	na	na	0.560921	0.435869	4020	4042	79	6486	0	1	0	-1	0.615012	-1	FALSE
all	SNRNP200_A375_gRNA4100	A375	SNRNP200	CACAAACACGTTGTCGTCACTGT	ACAGTGACGACAACGTGTTTGTG	ENST00000323853	CCCGTGTCTGCTCTGAGAAACAGTGCCTTTGAGAGTCTTTACCAAGATAAATTTCCTTTCTTCAATCCCATCCAGACCCAGGTGTTTAACACTGTATACAACAGTGACGACAACGTGTTTGTGGGGGCCCCCACGGGCAGCGGGAAGACTATTTGTGCAGAGTTTGCCATCCTGCGAATGCTGCTGCAGAGCTCGGAGGGGCGCTGTGTGTACATCACCCCCA	aacccctaccaactggtcggggtttgaaac	-14.1	((((((.(((....))).)))))).......(((...(((....)))...)))	-35.08	0.183,0.137,0,0.229,0.137,0.275,0.321,0.137,0.092,0,0.229,0.091,0.137,0.137,0.64,0.501,0.684,1,0.638,0.274,0.547,0.41,0.182,0.365,0.365,0.046,0.182,0.319,0.41,0.365,0.636,0.773,0.818,1,0.455,0.318,0.045,0.227,0.455,0.636,1,0.045,0.227,0.409,0.318,0.273,0.682,0.364,0.136,0.273,0.455,0.5,1,0.273,0.182,0.227,0.227,0.182,0.045,0.136,0.273,0.273,0.409,0.864,0.5,0.273,0.455,0.091,0.273,0.409,0.136,0,0.…	0.426808,0.257725,0.133347,0.039559,0.709661,0.267517,0.026319,0.054437,0.018725,0.658406,0.120870,0.023048,0.095311,0.394700,0.365047,0.024041,0.027003,0.077484,0.397018,0.048525,0.807298,0.598848,0.046296,0.548981,0.006942,0.663600,0.705089,0.004342,0.522838,0.354290,0.226767,0.118688,0.727461,0.089000,0.243169,0.007443,0.007813,0.015751,0.070422,0.182174,0.001501,0.052017,0.009996,0.000821,0.4…	101	123	4000	4222	na	na	0	na	na	0.572087	0.424703	4100	4122	79	6486	0	1	0	-1	0.627497	-1	FALSE
all	SNRNP200_A375_gRNA5995	A375	SNRNP200	TCCACTCCCTTGTCTGTGCAACG	CGTTGCACAGACAAGGGAGTGGA	ENST00000323853	TCTGGCAGCTATGGAACTGGCCCAGATGGTCACCCAAGCCATGTGGTCCAAGGACTCATACCTGAAGCAGCTGCCACACTTCACCTCTGAGCATATCAAACGTTGCACAGACAAGGGAGTGGAGAGTGTTTTCGACATCATGGAGATGGAGGATGAAGAACGGAACGCGTTGCTTCAGCTGACTGACAGCCAGATTGCAGATGTGGCTCGCTTTTGTAACCGC	aacccctaccaactggtcggggtttgaaac	-13.4	((((((.(((....))).))))))........(((..........))).....	-42.62	0.113,0,0.17,0.281,0.056,0.281,0.056,0,0.056,0.98,0.782,0.056,0.391,1,1,0.936,0.056,0,0.056,0,0,0,0,0.056,0.056,0.056,0,0.056,0.056,0,0.111,0.333,0.056,0.277,0.111,0.222,0.555,0.111,0,0.277,0,0.111,0.332,0.055,0,0.055,0,0,0,0.492,0.164,0.273,0.164,0.597,0.271,0.326,0.76,1,0.758,0.487,0.325,0.325,0.271,0.324,1,1,0.594,0.54,0.108,0,0.054,0.324,0.054,0.054,0.162,0.323,0.431,0.323,0.215,0.646,0.431,0…	0.886333,0.157632,0.515814,0.306122,0.921138,0.197868,0.088817,0.216329,0.271777,0.961763,0.604113,0.019530,0.368763,0.854192,0.983463,0.887611,0.612410,0.030399,0.097282,0.075371,0.882895,0.522780,0.103544,0.779366,0.853310,0.683516,0.024884,0.068946,0.326817,0.087635,0.814524,0.002573,0.640574,0.016687,0.058195,0.003855,0.039062,0.002897,0.136215,0.016176,0.029900,0.064692,0.738958,0.065589,0.7…	101	123	5895	6117	na	na	0	na	na	0.836567	0.160223	5995	6017	79	6486	0	1	0	-1	0.923221	-1	FALSE
all	SNRNP200_A375_gRNA6096	A375	SNRNP200	AGCGGTTACAAAAGCGAGCCACA	TGTGGCTCGCTTTTGTAACCGCT	ENST00000323853	GTTGCACAGACAAGGGAGTGGAGAGTGTTTTCGACATCATGGAGATGGAGGATGAAGAACGGAACGCGTTGCTTCAGCTGACTGACAGCCAGATTGCAGATGTGGCTCGCTTTTGTAACCGCTACCCTAATATCGAACTATCTTATGAGGTGGTAGATAAGGACAGCATCCGCAGTGGCGGGCCAGTTGTGGTGCTGGTGCAGCTGGAGCGAGAGGAGGAAGT	aacccctaccaactggtcggggtttgaaac	-15.8	((((((.(((....))).)))))).......(.((((.(......))))).).	-34.7	0.963,0.589,0.482,0.214,0.482,0.107,0.375,0.214,0.643,0.268,0.429,0.161,0,0,0.199,0.53,0.912,0.398,0.199,0.397,0.132,0.198,0.132,0.397,0,0.066,0,0,0.198,0.066,0.132,0.132,0.724,0.263,0.197,0.263,0.131,0.197,0.591,0.262,0.524,0.524,0.459,0.393,0.785,0.196,0.262,0.904,0.327,0.457,0.522,0.718,0.196,0.784,0.902,0.391,0.848,1,0.848,0.065,0.456,0.716,1,0.651,0.784,0.457,0.457,1,0.523,0.786,0.393,0.131,…	0.460577,0.316379,0.617218,0.055770,0.940808,0.312065,0.028134,0.313772,0.137759,0.573579,0.931466,0.025943,0.085519,0.784166,0.537042,0.123731,0.441382,0.072070,0.950395,0.028323,0.818433,0.717435,0.372932,0.924214,0.155006,0.211403,0.037469,0.325581,0.936205,0.274665,0.564407,0.021062,0.632000,0.039206,0.822733,0.013815,0.011227,0.405485,0.024148,0.084909,0.002974,0.862331,0.056211,0.007139,0.6…	101	123	5996	6218	na	na	0	na	na	0.850663	0.146127	6096	6118	79	6486	0	1	0	-1	0.938983	-1	FALSE
all	RPA1_A375_gRNA236	A375	RPA1	ATCCATCACTCATGAGCAGTCGA	TCGACTGCTCATGAGTGATGGAT	ENST00000254719	CCATTGCGGCCATCATGCAGAAGGGGGATACAAACATAAAGCCCATCCTCCAAGTCATCAACATCCGTCCCATTACTACGGGGAATAGTCCGCCGCGTTATCGACTGCTCATGAGTGATGGATTGAACACTCTATCCTCTTTCATGTTGGCGACACAGTTGAACCCTCTCGTGGAGGAAGAACAATTGTCCAGCAACTGTGTATGCCAGATTCACAGATTTAT	aacccctaccaactggtcggggtttgaaac	-12.8	((((((.(((....))).)))))).............................	-39.82	-1,-1,-1,-1,-1,-1,-1,-1,-1,-1,-1,-1,-1,-1,-1,-1,-1,-1,-1,-1,-1,-1,-1,-1,-1,-1,-1,-1,-1,-1,-1,-1,-1,-1,-1,-1,-1,-1,-1,-1,-1,-1,-1,-1,-1,-1,-1,-1,-1,-1,-1,-1,-1,-1,-1,-1,-1,-1,-1,-1,-1,-1,-1,-1,-1,-1,-1,-1,-1,-1,-1,-1,-1,-1,-1,-1,-1,-1,-1,-1,-1,-1,-1,-1,-1,-1,-1,-1,-1,-1,-1,-1,-1,-1,-1,-1,-1,-1,-1,-1,-1,-1,-1,-1,-1,-1,-1,-1,-1,-1,-1,-1,-1,-1,-1,-1,-1,-1,-1,-1,-1,-1,-1,-1,-1,-1,-1,-1,-1,-1,-1,-1,-1,…	0.363051,0.660317,0.542153,0.221342,0.589352,0.530022,0.616992,0.851629,0.860092,0.581699,0.098631,0.861645,0.135490,0.927592,0.263723,0.000221,0.103169,0.640479,0.362845,0.872932,0.885454,0.996333,0.545177,0.958085,0.577727,0.054283,0.229280,0.545887,0.796684,0.280204,0.128429,0.428688,0.699597,0.167515,0.791600,0.356508,0.424667,0.569124,0.871709,0.000241,0.423427,0.145111,0.482966,0.250627,0.4…	101	123	136	358	na	na	0	na	na	0.0541475	0.940553	236	258	111	1958	0	1	0	-1	0.0676407	-1	FALSE
all	RPA1_A375_gRNA266	A375	RPA1	TCGCCAACATGAAAGAGGATAGA	TCTATCCTCTTTCATGTTGGCGA	ENST00000254719	CAAACATAAAGCCCATCCTCCAAGTCATCAACATCCGTCCCATTACTACGGGGAATAGTCCGCCGCGTTATCGACTGCTCATGAGTGATGGATTGAACACTCTATCCTCTTTCATGTTGGCGACACAGTTGAACCCTCTCGTGGAGGAAGAACAATTGTCCAGCAACTGTGTATGCCAGATTCACAGATTTATTGTGAACACTCTGAAAGACGGAAGGAGAGT	aacccctaccaactggtcggggtttgaaac	-14.5	((((((.(((....))).)))))).....(((............)))......	-39.16	-1,-1,-1,-1,-1,-1,-1,-1,-1,-1,-1,-1,-1,-1,-1,-1,-1,-1,-1,-1,-1,-1,-1,-1,-1,-1,-1,-1,-1,-1,-1,-1,-1,-1,-1,-1,-1,-1,-1,-1,-1,-1,-1,-1,-1,-1,-1,-1,-1,-1,-1,-1,-1,-1,-1,-1,-1,-1,-1,-1,-1,-1,-1,-1,-1,-1,-1,-1,-1,-1,-1,-1,-1,-1,-1,-1,-1,-1,-1,-1,-1,-1,-1,-1,-1,-1,-1,-1,-1,-1,-1,-1,-1,-1,-1,-1,-1,-1,-1,-1,-1,-1,-1,-1,-1,-1,-1,-1,-1,-1,-1,-1,-1,-1,-1,-1,-1,-1,-1,-1,-1,-1,-1,-1,-1,-1,-1,-1,-1,-1,-1,-1,-1,…	0.609550,0.771442,0.673742,0.394464,0.548107,0.551311,0.687950,0.859868,0.796158,0.674130,0.123826,0.796806,0.069822,0.955939,0.145787,0.000324,0.387256,0.611891,0.436030,0.949803,0.838165,0.991676,0.466965,0.925697,0.739814,0.190179,0.144279,0.559316,0.818643,0.397819,0.127409,0.309129,0.745067,0.129817,0.862622,0.293706,0.387106,0.473061,0.866587,0.000098,0.533736,0.031540,0.381402,0.214839,0.5…	101	123	166	388	na	na	0	na	na	0.0610599	0.933641	266	288	111	1958	0	1	0	-1	0.0838745	-1	FALSE
all	RPA1_A375_gRNA281	A375	RPA1	GAGGGTTCAACTGTGTCGCCAAC	GTTGGCGACACAGTTGAACCCTC	ENST00000254719	TCCTCCAAGTCATCAACATCCGTCCCATTACTACGGGGAATAGTCCGCCGCGTTATCGACTGCTCATGAGTGATGGATTGAACACTCTATCCTCTTTCATGTTGGCGACACAGTTGAACCCTCTCGTGGAGGAAGAACAATTGTCCAGCAACTGTGTATGCCAGATTCACAGATTTATTGTGAACACTCTGAAAGACGGAAGGAGAGTAGTTATCTTGATGGA	aacccctaccaactggtcggggtttgaaac	-14.6	((((((.(((....))).)))))).........(((.((....))..)))...	-40.35	-1,-1,-1,-1,-1,-1,-1,-1,-1,-1,-1,-1,-1,-1,-1,-1,-1,-1,-1,-1,-1,-1,-1,-1,-1,-1,-1,-1,-1,-1,-1,-1,-1,-1,-1,-1,-1,-1,-1,-1,-1,-1,-1,-1,-1,-1,-1,-1,-1,-1,-1,-1,-1,-1,-1,-1,-1,-1,-1,-1,-1,-1,-1,-1,-1,-1,-1,-1,-1,-1,-1,-1,-1,-1,-1,-1,-1,-1,-1,-1,-1,-1,-1,-1,-1,-1,-1,-1,-1,-1,-1,-1,-1,-1,-1,-1,-1,-1,-1,-1,-1,-1,-1,-1,-1,-1,-1,-1,-1,-1,-1,-1,-1,-1,-1,-1,-1,-1,-1,-1,-1,-1,-1,-1,-1,-1,-1,-1,-1,-1,-1,-1,-1,…	0.742489,0.514304,0.604020,0.394067,0.523805,0.778260,0.667176,0.853039,0.888139,0.638344,0.151736,0.729943,0.019429,0.983815,0.179593,0.000209,0.285244,0.625894,0.331683,0.972385,0.873062,0.990687,0.549551,0.926526,0.605731,0.350669,0.280486,0.538311,0.827412,0.339299,0.113668,0.292599,0.475578,0.042510,0.706049,0.069085,0.350807,0.433557,0.693419,0.000119,0.536018,0.032986,0.376612,0.209365,0.5…	101	123	181	403	na	na	0	na	na	0.0645161	0.930184	281	303	111	1958	0	1	0	-1	0.0919913	-1	FALSE
all	RPA1_A375_gRNA334	A375	RPA1	AAATCTGTGAATCTGGCATACAC	GTGTATGCCAGATTCACAGATTT	ENST00000254719	TATCGACTGCTCATGAGTGATGGATTGAACACTCTATCCTCTTTCATGTTGGCGACACAGTTGAACCCTCTCGTGGAGGAAGAACAATTGTCCAGCAACTGTGTATGCCAGATTCACAGATTTATTGTGAACACTCTGAAAGACGGAAGGAGAGTAGTTATCTTGATGGAATTAGAAGTTTTGAAGTCAGCTGAAGCAGTTGGAGTGAAGATTGGCAATCCAG	aacccctaccaactggtcggggtttgaaac	-12.8	((((((.(((....))).)))))).............................	-34.79	-1,-1,-1,-1,-1,-1,-1,-1,-1,-1,-1,-1,-1,-1,-1,-1,-1,-1,-1,-1,-1,-1,-1,-1,-1,-1,-1,-1,-1,-1,-1,-1,-1,-1,-1,-1,-1,-1,-1,-1,-1,-1,-1,-1,-1,-1,-1,-1,-1,-1,-1,-1,-1,-1,-1,-1,-1,-1,-1,-1,-1,-1,-1,-1,-1,-1,-1,-1,-1,-1,-1,-1,-1,-1,-1,-1,-1,-1,-1,-1,-1,-1,-1,-1,-1,-1,-1,-1,-1,-1,-1,-1,-1,-1,-1,-1,-1,-1,-1,-1,-1,-1,-1,-1,-1,-1,-1,-1,-1,-1,-1,-1,-1,-1,-1,-1,-1,-1,-1,-1,-1,-1,-1,-1,-1,-1,-1,-1,-1,-1,-1,-1,-1,…	0.882680,0.488385,0.382131,0.304521,0.433986,0.921181,0.563717,0.837685,0.775846,0.662234,0.331722,0.620012,0.041533,0.992361,0.296249,0.000159,0.097966,0.643191,0.620091,0.890271,0.850832,0.975332,0.643592,0.862354,0.706326,0.760284,0.123809,0.309200,0.839332,0.257399,0.100856,0.290764,0.400647,0.013090,0.701587,0.170456,0.407312,0.520497,0.313784,0.001152,0.537710,0.007331,0.273869,0.237388,0.7…	101	123	234	456	na	na	0	na	na	0.0767281	0.917972	334	356	111	1958	0	1	0	-1	0.120671	-1	FALSE
all	RPA1_A375_gRNA830	A375	RPA1	GAGGAAAGAACTTGTCCACTTGC	GCAAGTGGACAAGTTCTTTCCTC	ENST00000254719	GTCAGATCCGTACCTGGAGCAACTCCCGAGGGGAAGGGAAGCTTTTCTCCCTAGAACTGGTTGACGAAAGTGGTGAAATCCGAGCTACAGCTTTCAATGAGCAAGTGGACAAGTTCTTTCCTCTTATTGAAGTGAACAAGGTGTATTATTTCTCGAAAGGCACCCTGAAGATTGCTAACAAGCAGTTCACAGCTGTTAAAAATGACTACGAGATGACCTTCAA	aacccctaccaactggtcggggtttgaaac	-16.5	((((((.(((....))).))))))....(((((.......)))))........	-38.12	0,0.111,0.111,0.333,0.111,0.667,0.333,0,0.222,0.222,0.111,0.667,0,0.222,0.333,0.111,0.111,0.556,0.222,0.444,0.889,0.444,0,0.111,0,0,0,0.778,0.222,-1,-1,-1,-1,-1,-1,-1,-1,-1,-1,-1,-1,-1,-1,-1,-1,-1,-1,-1,-1,-1,-1,-1,-1,-1,-1,-1,-1,-1,-1,-1,-1,-1,-1,-1,-1,-1,-1,-1,-1,-1,-1,-1,-1,-1,-1,-1,-1,-1,-1,-1,-1,-1,-1,-1,-1,-1,-1,-1,-1,-1,-1,-1,-1,-1,-1,-1,-1,-1,-1,-1,-1,-1,-1,-1,-1,-1,-1,-1,-1,-1,-1,-1,-1,-…	0.890142,0.358806,0.111880,0.346606,0.221060,0.190298,0.111061,0.724853,0.538722,0.697843,0.086879,0.328880,0.012959,0.984515,0.129828,0.005591,0.106296,0.206035,0.128957,0.658915,0.613769,0.965164,0.300739,0.897231,0.436981,0.345383,0.241613,0.635955,0.758086,0.100831,0.340384,0.168819,0.217096,0.181160,0.456296,0.035984,0.035536,0.113982,0.219976,0.000110,0.129645,0.006340,0.323495,0.031006,0.2…	101	123	730	952	na	na	0	na	na	0.191014	0.803687	830	852	111	1958	0	1	0	-1	0.389069	-1	FALSE
all	RPA1_A375_gRNA1900	A375	RPA1	TCGGCCATACTCTCTGTAGTCCA	TGGACTACAGAGAGTATGGCCGA	ENST00000254719	AATGCCAACTTCCGATCTTTCATATTCAGAGTCAGGGTCAAAGTGGAGACCTACAACGACGAGTCTCGAATTAAGGCCACTGTGATGGACGTGAAGCCCGTGGACTACAGAGAGTATGGCCGAAGGCTGGTCATGAGCATCAGGAGAAGTGCATTGATGTGAGAGGAGCAGTGCCAATCGGGCAGAAGTTTGCAAATAGGCAGAATGGAATCGATTTCCTCCC	aacccctaccaactggtcggggtttgaaac	-15.3	((((((.(((....))).))))))........((.(.(((.....)))).)).	-39.1	-1,-1,-1,-1,-1,-1,-1,-1,-1,-1,-1,-1,-1,-1,-1,-1,-1,-1,-1,-1,-1,-1,-1,-1,-1,-1,-1,-1,-1,-1,-1,-1,-1,-1,-1,-1,-1,-1,-1,-1,-1,-1,-1,-1,-1,-1,-1,-1,-1,-1,-1,-1,-1,-1,-1,-1,-1,0.867,0.2,0.4,0.792,0.528,0.198,0.396,0.132,0.131,0.196,0.196,0.196,0.262,0.13,0.195,0.716,0,0.13,0.13,0.065,0.13,0,0.065,0.065,0.065,0.258,0.129,0.452,0.192,0.128,0.192,0.128,0.128,0.191,0.127,0.382,1,0.254,0.318,0.064,0.191,0.…	0.904798,0.164609,0.512362,0.225124,0.187912,0.366658,0.041456,0.032247,0.893755,0.864425,0.793734,0.037847,0.622811,0.844768,0.941138,0.267318,0.155930,0.442465,0.045934,0.031762,0.668661,0.313812,0.155350,0.874596,0.943406,0.651623,0.230541,0.009763,0.965206,0.405966,0.998148,0.017202,0.255557,0.117178,0.773745,0.167162,0.166435,0.108120,0.103211,0.237220,0.524554,0.073333,0.031941,0.962378,0.8…	101	123	1800	2022	na	na	0	na	na	0.437558	0.557143	1900	1922	111	1958	0	1	0	-1	0.968074	-1	FALSE
all	PSMA6_A375_gRNA238	A375	PSMA6	CAGTCTTTCCCTCTGACAGCTAC	GTAGCTGTCAGAGGGAAAGACTG	ENST00000261479	CGCCGGTTTTGACCGCCACATTACCATTTTTTCACCCGAGGGTCGGCTCTACCAAGTAGAATATGCTTTTAAGGCTATTAACCAGGGTGGCCTTACATCAGTAGCTGTCAGAGGGAAAGACTGTGCAGTAATTGTCACACAGAAGAAAGTACCTGACAAATTATTGGATTCCAGCACAGTGACTCACTTATTCAAGATAACTGAAAACATTGGTTGTGTGATG	aacccctaccaactggtcggggtttgaaac	-14.6	((((((.(((....))).))))))........(((.........)))......	-40.44	0.05,0.252,0.101,0,0,0,0,0,0,0,0,0,0,0,0,0,0,0,0,0,0,0.1,-1,-1,-1,-1,-1,-1,-1,-1,-1,-1,-1,-1,-1,-1,-1,-1,-1,-1,-1,-1,-1,-1,-1,-1,-1,-1,-1,-1,-1,-1,-1,-1,-1,-1,-1,-1,-1,-1,-1,-1,-1,-1,-1,-1,-1,-1,-1,-1,-1,-1,-1,-1,-1,-1,-1,-1,-1,-1,-1,-1,-1,-1,-1,-1,-1,-1,-1,-1,-1,-1,-1,-1,-1,-1,-1,-1,-1,-1,-1,-1,-1,-1,-1,-1,-1,-1,-1,-1,-1,-1,-1,-1,-1,-1,-1,-1,-1,-1,-1,-1,-1,-1,-1,-1,-1,-1,-1,-1,-1,-1,-1,-1,-1,-1,…	0.972294,0.403858,0.589358,0.345758,0.580326,0.730375,0.517338,0.838394,0.834366,0.522716,0.394282,0.761828,0.067942,0.980767,0.122394,0.000032,0.089968,0.589399,0.830615,0.925438,0.872798,0.970342,0.572466,0.939119,0.693461,0.575868,0.430610,0.845103,0.786213,0.376853,0.115128,0.387881,0.523711,0.350128,0.931424,0.131045,0.449372,0.363734,0.889116,0.000124,0.608215,0.011226,0.453833,0.167269,0.5…	101	123	138	360	na	na	0	na	na	0.230321	0.747328	238	260	121	858	0	1	0	-1	0.158537	-1	FALSE
all	PSMA6_A375_gRNA352	A375	PSMA6	GCTGTCATTCCGGTCATCACACA	TGTGTGATGACCGGAATGACAGC	ENST00000261479	GAAAGACTGTGCAGTAATTGTCACACAGAAGAAAGTACCTGACAAATTATTGGATTCCAGCACAGTGACTCACTTATTCAAGATAACTGAAAACATTGGTTGTGTGATGACCGGAATGACAGCTGACAGCAGATCCCAGGTACAGAGGGCACGCTATGAGGCAGCTAACTGGAAATACAAGTATGGCTATGAGATTCCTGTGGACATGCTGTGTAAAAGAATT	aacccctaccaactggtcggggtttgaaac	-15.1	((((((.(((....))).))))))(((...((((......))))..)))....	-40.27	-1,-1,-1,-1,-1,-1,-1,-1,-1,-1,-1,-1,-1,-1,-1,-1,-1,-1,-1,-1,-1,-1,-1,-1,-1,-1,-1,-1,-1,-1,-1,-1,-1,-1,-1,-1,-1,-1,-1,-1,-1,-1,-1,-1,-1,-1,-1,-1,-1,-1,-1,-1,-1,-1,-1,-1,-1,-1,-1,-1,-1,-1,-1,-1,-1,-1,-1,-1,-1,-1,-1,-1,-1,-1,-1,-1,-1,-1,-1,-1,-1,-1,-1,-1,-1,-1,-1,-1,-1,-1,-1,-1,-1,-1,-1,-1,-1,-1,-1,-1,-1,-1,-1,-1,-1,-1,-1,-1,-1,-1,-1,-1,-1,-1,-1,-1,-1,-1,-1,-1,-1,-1,-1,-1,-1,-1,-1,-1,-1,-1,-1,-1,-1,…	0.850556,0.319914,0.374219,0.294918,0.227596,0.297969,0.261984,0.515898,0.784735,0.841188,0.102022,0.385629,0.094858,0.653219,0.564860,0.005372,0.014811,0.356754,0.436292,0.323726,0.417790,0.978725,0.199747,0.855789,0.380639,0.317322,0.425968,0.795897,0.211457,0.279179,0.045074,0.174901,0.195211,0.117096,0.234663,0.089187,0.101166,0.409696,0.421934,0.005607,0.412064,0.071922,0.104790,0.152962,0.4…	101	123	252	474	na	na	0	na	na	0.341108	0.63654	352	374	121	858	0	1	0	-1	0.313008	-1	FALSE
all	PSMA6_A375_gRNA355	A375	PSMA6	TCAGCTGTCATTCCGGTCATCAC	GTGATGACCGGAATGACAGCTGA	ENST00000261479	AGACTGTGCAGTAATTGTCACACAGAAGAAAGTACCTGACAAATTATTGGATTCCAGCACAGTGACTCACTTATTCAAGATAACTGAAAACATTGGTTGTGTGATGACCGGAATGACAGCTGACAGCAGATCCCAGGTACAGAGGGCACGCTATGAGGCAGCTAACTGGAAATACAAGTATGGCTATGAGATTCCTGTGGACATGCTGTGTAAAAGAATTGCC	aacccctaccaactggtcggggtttgaaac	-14.6	((((((.(((....))).)))))).........((((......))))......	-40.65	-1,-1,-1,-1,-1,-1,-1,-1,-1,-1,-1,-1,-1,-1,-1,-1,-1,-1,-1,-1,-1,-1,-1,-1,-1,-1,-1,-1,-1,-1,-1,-1,-1,-1,-1,-1,-1,-1,-1,-1,-1,-1,-1,-1,-1,-1,-1,-1,-1,-1,-1,-1,-1,-1,-1,-1,-1,-1,-1,-1,-1,-1,-1,-1,-1,-1,-1,-1,-1,-1,-1,-1,-1,-1,-1,-1,-1,-1,-1,-1,-1,-1,-1,-1,-1,-1,-1,-1,-1,-1,-1,-1,-1,-1,-1,-1,-1,-1,-1,-1,-1,-1,-1,-1,-1,-1,-1,-1,-1,-1,-1,-1,-1,-1,-1,-1,-1,-1,-1,-1,-1,-1,-1,-1,-1,-1,-1,-1,-1,-1,-1,-1,-1,…	0.763354,0.471086,0.641670,0.386678,0.399372,0.280456,0.313121,0.572375,0.883403,0.819042,0.157068,0.480319,0.096532,0.900969,0.804310,0.004740,0.023996,0.360432,0.414740,0.485452,0.415940,0.981824,0.356830,0.844806,0.397365,0.350150,0.507075,0.737873,0.121888,0.342183,0.060880,0.146584,0.417120,0.261050,0.236683,0.127834,0.117392,0.461090,0.522050,0.032428,0.447232,0.091681,0.131337,0.278086,0.6…	101	123	255	477	na	na	0	na	na	0.344023	0.633625	355	377	121	858	0	1	0	-1	0.317073	-1	FALSE
all	PSMA6_A375_gRNA356	A375	PSMA6	GTCAGCTGTCATTCCGGTCATCA	TGATGACCGGAATGACAGCTGAC	ENST00000261479	GACTGTGCAGTAATTGTCACACAGAAGAAAGTACCTGACAAATTATTGGATTCCAGCACAGTGACTCACTTATTCAAGATAACTGAAAACATTGGTTGTGTGATGACCGGAATGACAGCTGACAGCAGATCCCAGGTACAGAGGGCACGCTATGAGGCAGCTAACTGGAAATACAAGTATGGCTATGAGATTCCTGTGGACATGCTGTGTAAAAGAATTGCCG	aacccctaccaactggtcggggtttgaaac	-14.6	((((((.(((....))).))))))..........((((......)))).....	-41.06	-1,-1,-1,-1,-1,-1,-1,-1,-1,-1,-1,-1,-1,-1,-1,-1,-1,-1,-1,-1,-1,-1,-1,-1,-1,-1,-1,-1,-1,-1,-1,-1,-1,-1,-1,-1,-1,-1,-1,-1,-1,-1,-1,-1,-1,-1,-1,-1,-1,-1,-1,-1,-1,-1,-1,-1,-1,-1,-1,-1,-1,-1,-1,-1,-1,-1,-1,-1,-1,-1,-1,-1,-1,-1,-1,-1,-1,-1,-1,-1,-1,-1,-1,-1,-1,-1,-1,-1,-1,-1,-1,-1,-1,-1,-1,-1,-1,-1,-1,-1,-1,-1,-1,-1,-1,-1,-1,-1,-1,-1,-1,-1,-1,-1,-1,-1,-1,-1,-1,-1,-1,-1,-1,-1,-1,-1,-1,-1,-1,-1,-1,-1,-1,…	0.785644,0.434505,0.672935,0.345463,0.460662,0.306477,0.324663,0.641578,0.863617,0.810579,0.178192,0.480756,0.124289,0.915615,0.813520,0.003122,0.019564,0.377790,0.330314,0.660130,0.451223,0.981863,0.310349,0.847350,0.517952,0.346165,0.582163,0.693725,0.122851,0.324155,0.062041,0.137416,0.323068,0.302963,0.173836,0.083450,0.115269,0.438302,0.583961,0.022912,0.423972,0.133344,0.133302,0.242237,0.6…	101	123	256	478	na	na	0	na	na	0.344995	0.632653	356	378	121	858	0	1	0	-1	0.318428	-1	FALSE
all	PSMA6_A375_gRNA434	A375	PSMA6	GTCCACAGGAATCTCATAGCCAT	ATGGCTATGAGATTCCTGTGGAC	ENST00000261479	ATAACTGAAAACATTGGTTGTGTGATGACCGGAATGACAGCTGACAGCAGATCCCAGGTACAGAGGGCACGCTATGAGGCAGCTAACTGGAAATACAAGTATGGCTATGAGATTCCTGTGGACATGCTGTGTAAAAGAATTGCCGATATTTCTCAGGTCTACACACAGAATGCTGAAATGAGGCCTCTTGGTTGTTGTATGATTTTAATTGGTATAGATGAAG	aacccctaccaactggtcggggtttgaaac	-14.6	((((((.(((....))).))))))(((....(((...)))...))).......	-40.22	-1,-1,-1,-1,-1,-1,-1,-1,-1,-1,-1,-1,-1,-1,-1,-1,-1,-1,-1,-1,-1,-1,-1,-1,-1,-1,-1,-1,-1,-1,-1,-1,-1,-1,-1,-1,-1,-1,-1,-1,-1,-1,-1,-1,-1,-1,-1,-1,-1,-1,-1,-1,-1,-1,-1,-1,-1,0,0,0.25,0.125,0.125,0,0,0,0,0.25,0,0.125,0.125,0,0.125,0.375,0.375,0.375,-1,-1,-1,-1,-1,-1,-1,-1,-1,-1,-1,-1,-1,-1,-1,1,1,1,0.25,0.5,0.375,0.875,1,0.125,0.375,1,0.125,0.125,1,0.375,0.375,1,-1,-1,-1,-1,-1,-1,-1,-1,-1,-1,-1,-1,-1…	0.505133,0.289849,0.800230,0.594875,0.865008,0.306149,0.277973,0.565802,0.397778,0.690980,0.644541,0.135247,0.052619,0.986153,0.947424,0.265695,0.058530,0.499742,0.914001,0.443814,0.771367,0.956372,0.412963,0.535752,0.255523,0.882293,0.456600,0.816994,0.143793,0.090474,0.045024,0.018250,0.115580,0.067247,0.111978,0.005481,0.041594,0.053940,0.165706,0.045097,0.051919,0.865136,0.114949,0.071614,0.5…	101	123	334	556	na	na	0	na	na	0.420797	0.556851	434	456	121	858	0	1	0	-1	0.424119	-1	FALSE
all	PSMA6_A375_gRNA718	A375	PSMA6	GATAGAACAGTAGACAGGCATGT	ACATGCCTGTCTACTGTTCTATC	ENST00000261479	TGCAGCGGGAGTTAAACAAACTGAGTCAACCAGCTTCCTTGAAAAAAAAGTGAAGAAGAAATTTGATTGGACATTTGAACAGACAGTGGAAACTGCAATTACATGCCTGTCTACTGTTCTATCAATTGATTTCAAACCTTCAGAAATAGAAGTTGGAGTAGTGACAGTTGAAAATCCTAAATTCAGGATTCTTACAGAAGCAGAGATTGATGCTCACCTTGTT	aacccctaccaactggtcggggtttgaaac	-12.9	((((((.(((....))).))))))............(((((......)).)))	-39.55	0.148,0.148,0.502,0.369,0.148,0,0,0.148,0.148,0.222,0.148,0.074,0.222,0.295,0.295,0.148,0.295,0.443,0.222,0.295,0.148,0.662,0.148,0.662,0.074,0.149,0.298,0.298,0.298,0,0.375,0.375,0.225,0.15,0.45,0.076,0,0.227,0.151,0.076,0.076,0,0,0.458,0.458,0.462,0.462,0.728,0.633,0.385,0.467,0.311,0.587,0.233,0,0,0,0,0,0,0,0.08,0,0,0,0.08,0,0,0,0,0.081,0,0,0,0,0,0,0,0,0.083,0,0,0.084,0,0,0,0,0,0,0,-1,-1,-1,-1…	0.649069,0.360783,0.635869,0.105949,0.456888,0.306121,0.136479,0.875131,0.914035,0.871698,0.486855,0.072875,0.008764,0.949673,0.353321,0.006587,0.282045,0.724074,0.577679,0.945609,0.939535,0.988138,0.527433,0.922323,0.853681,0.666772,0.693114,0.947286,0.785149,0.353761,0.158363,0.467191,0.410992,0.012555,0.164311,0.007208,0.381168,0.331112,0.539701,0.003269,0.040673,0.016706,0.093491,0.104629,0.3…	101	123	618	840	na	na	0	na	na	0.696793	0.280855	718	740	121	858	0	1	0	-1	0.808943	-1	FALSE
all	EPRS1_A375_gRNA2538	A375	EPRS1	CCACATCTCCTTGAACAGCCACT	AGTGGCTGTTCAAGGAGATGTGG	ENST00000366923	CCACAAAAAATGAGACCTCTGCTCCTTTTAAGGAAAGACCAACACCTTCTCTGAATAATAATTGTACTACATCTGAGGATTCCTTGGTCCTTTACAATAGAGTGGCTGTTCAAGGAGATGTGGTTCGTGAATTAAAAGCCAAGAAAGCACCAAAGGAAGATGTAGATGCAGCTGTAAAACAGCTTTTGTCTTTGAAAGCTGAATATAAGGAGAAAACTGGCCA	aacccctaccaactggtcggggtttgaaac	-12.8	((((((.(((....))).)))))).............................	-43.09	0.182,0.091,0.273,0.182,0.545,0.273,0.091,0.545,0,0.091,0.091,0,0,0,-1,-1,-1,-1,-1,-1,-1,-1,-1,-1,-1,-1,-1,-1,-1,-1,-1,-1,-1,-1,-1,-1,-1,-1,-1,-1,-1,-1,-1,-1,-1,-1,-1,-1,-1,-1,-1,-1,-1,-1,-1,-1,-1,-1,-1,-1,-1,-1,-1,-1,-1,-1,-1,-1,-1,-1,-1,-1,-1,-1,-1,-1,-1,-1,-1,-1,-1,-1,-1,-1,-1,-1,-1,-1,-1,-1,-1,-1,-1,-1,-1,-1,-1,-1,0.357,0.179,0.537,-1,-1,-1,0,0,0.539,0.36,0.36,0,1,0.902,0.361,0.18,0.362,-1,-1…	0.461710,0.210580,0.276326,0.543834,0.641096,0.232997,0.026319,0.689023,0.770647,0.765967,0.358917,0.344280,0.320740,0.995189,0.124583,0.022939,0.258771,0.628610,0.596804,0.900881,0.740913,0.969414,0.196199,0.911889,0.749472,0.713968,0.373128,0.958839,0.716299,0.673946,0.317278,0.317615,0.558475,0.010183,0.022349,0.015982,0.216736,0.197376,0.435903,0.002709,0.143169,0.112444,0.071262,0.119894,0.4…	101	123	2438	2660	na	na	0	na	na	0.505983	0.48943	2538	2560	271	4806	0	1	0	-1	0.49978	-1	FALSE
all	EPRS1_A375_gRNA3493	A375	EPRS1	ACAAACATGGGGAAGTAGCAGTT	AACTGCTACTTCCCCATGTTTGT	ENST00000366923	TGACATAAGTGGCTGTTATATTCTTCGTCCCTGGGCCTATGCCATTTGGGAAGCCATCAAGGACTTTTTTGATGCTGAGATCAAGAAACTTGGTGTTGAAAACTGCTACTTCCCCATGTTTGTGTCTCAAAGTGCATTAGAGAAAGAGAAGACTCATGTTGCTGACTTTGCCCCAGAGGTTGCTTGGGTTACAAGATCTGGCAAAACCGAGCTGGCAGAACCA	aacccctaccaactggtcggggtttgaaac	-12.8	((((((.(((....))).)))))).............................	-39.33	0.503,0.335,0.168,0.671,0.503,0.168,0.985,0.335,-1,-1,-1,-1,-1,-1,-1,-1,-1,-1,-1,-1,-1,-1,0,0.168,0.335,0.503,1,0.335,0,0,-1,-1,-1,-1,-1,-1,-1,-1,-1,-1,0.503,0,0.168,0,0.838,0.671,0.168,0,0,0,0.335,0.335,0.168,0,0.168,0.503,0.168,0.335,-1,-1,-1,-1,-1,-1,-1,-1,-1,-1,-1,-1,-1,-1,-1,-1,-1,-1,-1,-1,-1,-1,-1,-1,-1,-1,-1,-1,0.327,0,0.327,0.327,0,0.163,0.163,0.653,0.652,0.326,0.163,0.163,1,0.976,1,0.488…	0.642486,0.158368,0.118253,0.547910,0.842771,0.073002,0.192658,0.384168,0.473405,0.900072,0.133222,0.001136,0.004392,0.994635,0.923948,0.039785,0.041362,0.162139,0.197559,0.865411,0.511104,0.649426,0.332975,0.648828,0.917252,0.929370,0.101991,0.811518,0.738950,0.028868,0.018592,0.006931,0.907275,0.002713,0.015339,0.004432,0.082720,0.044207,0.010724,0.042830,0.004946,0.100337,0.424887,0.062921,0.8…	101	123	3393	3615	na	na	0	na	na	0.69645	0.298963	3493	3515	271	4806	0	1	0	-1	0.710317	-1	FALSE
all	EPRS1_A375_gRNA3494	A375	EPRS1	CACAAACATGGGGAAGTAGCAGT	ACTGCTACTTCCCCATGTTTGTG	ENST00000366923	GACATAAGTGGCTGTTATATTCTTCGTCCCTGGGCCTATGCCATTTGGGAAGCCATCAAGGACTTTTTTGATGCTGAGATCAAGAAACTTGGTGTTGAAAACTGCTACTTCCCCATGTTTGTGTCTCAAAGTGCATTAGAGAAAGAGAAGACTCATGTTGCTGACTTTGCCCCAGAGGTTGCTTGGGTTACAAGATCTGGCAAAACCGAGCTGGCAGAACCAA	aacccctaccaactggtcggggtttgaaac	-14.5	((((((.(((....))).)))))).....(((......)))............	-40.91	0.335,0.168,0.671,0.503,0.168,0.985,0.335,-1,-1,-1,-1,-1,-1,-1,-1,-1,-1,-1,-1,-1,-1,0,0.168,0.335,0.503,1,0.335,0,0,-1,-1,-1,-1,-1,-1,-1,-1,-1,-1,0.503,0,0.168,0,0.838,0.671,0.168,0,0,0,0.335,0.335,0.168,0,0.168,0.503,0.168,0.335,-1,-1,-1,-1,-1,-1,-1,-1,-1,-1,-1,-1,-1,-1,-1,-1,-1,-1,-1,-1,-1,-1,-1,-1,-1,-1,-1,-1,0.327,0,0.327,0.327,0,0.163,0.163,0.653,0.652,0.326,0.163,0.163,1,0.976,1,0.488,0.651…	0.646167,0.176955,0.129843,0.481480,0.821155,0.091971,0.202091,0.364210,0.501524,0.907619,0.138346,0.001288,0.005065,0.995138,0.922737,0.036061,0.051426,0.165912,0.191545,0.912659,0.558630,0.648945,0.261281,0.630460,0.928773,0.945429,0.102831,0.831709,0.822214,0.022866,0.019400,0.008680,0.904010,0.002972,0.033569,0.005059,0.081128,0.049632,0.009107,0.061078,0.004830,0.084566,0.479771,0.067830,0.7…	101	123	3394	3616	na	na	0	na	na	0.696649	0.298763	3494	3516	271	4806	0	1	0	-1	0.710538	-1	FALSE
all	EPRS1_A375_gRNA3496	A375	EPRS1	GACACAAACATGGGGAAGTAGCA	TGCTACTTCCCCATGTTTGTGTC	ENST00000366923	CATAAGTGGCTGTTATATTCTTCGTCCCTGGGCCTATGCCATTTGGGAAGCCATCAAGGACTTTTTTGATGCTGAGATCAAGAAACTTGGTGTTGAAAACTGCTACTTCCCCATGTTTGTGTCTCAAAGTGCATTAGAGAAAGAGAAGACTCATGTTGCTGACTTTGCCCCAGAGGTTGCTTGGGTTACAAGATCTGGCAAAACCGAGCTGGCAGAACCAATT	aacccctaccaactggtcggggtttgaaac	-12.8	((((((.(((....))).)))))).............................	-41.08	0.671,0.503,0.168,0.985,0.335,-1,-1,-1,-1,-1,-1,-1,-1,-1,-1,-1,-1,-1,-1,0,0.168,0.335,0.503,1,0.335,0,0,-1,-1,-1,-1,-1,-1,-1,-1,-1,-1,0.503,0,0.168,0,0.838,0.671,0.168,0,0,0,0.335,0.335,0.168,0,0.168,0.503,0.168,0.335,-1,-1,-1,-1,-1,-1,-1,-1,-1,-1,-1,-1,-1,-1,-1,-1,-1,-1,-1,-1,-1,-1,-1,-1,-1,-1,-1,-1,0.327,0,0.327,0.327,0,0.163,0.163,0.653,0.652,0.326,0.163,0.163,1,0.976,1,0.488,0.651,0.163,0,0.3…	0.514116,0.215332,0.124138,0.647018,0.768045,0.088153,0.229371,0.452258,0.714706,0.915315,0.148435,0.001446,0.006510,0.996912,0.930399,0.053023,0.054475,0.201452,0.217193,0.916892,0.598423,0.693325,0.324745,0.700651,0.962136,0.952385,0.184820,0.920727,0.871641,0.044077,0.022456,0.012966,0.907773,0.002319,0.032577,0.005538,0.114846,0.052144,0.012968,0.064559,0.005775,0.058259,0.551819,0.080951,0.8…	101	123	3396	3618	na	na	0	na	na	0.697048	0.298365	3496	3518	271	4806	0	1	0	-1	0.710979	-1	FALSE
all	EPRS1_A375_gRNA3756	A375	EPRS1	GCCAAAGAAATTCACGAGTACGT	ACGTACTCGTGAATTTCTTTGGC	ENST00000366923	CATATGCAAAATGGGTACAGTCACACAGAGACCTGCCCATCAAGCTCAATCAGTGGTGCAATGTGGTGCGTTGGGAATTCAAGCATCCTCAGCCTTTCCTACGTACTCGTGAATTTCTTTGGCAGGAAGGGCACAGTGCTTTTGCTACCATGGAAGAGGCAGCGGAAGAGGTCTTGCAGATACTTGACTTATATGCTCAGGTATATGAAGAACTCCTGGCAAT	aacccctaccaactggtcggggtttgaaac	-12.8	((((((.(((....))).)))))).............................	-36.5	-1,-1,-1,-1,-1,-1,-1,-1,-1,-1,-1,-1,-1,-1,-1,-1,-1,-1,-1,-1,-1,-1,-1,-1,-1,-1,-1,-1,-1,-1,-1,-1,-1,-1,-1,-1,-1,-1,-1,-1,-1,-1,-1,-1,-1,-1,-1,-1,-1,-1,-1,-1,-1,-1,-1,-1,-1,-1,-1,-1,-1,-1,-1,-1,-1,-1,-1,-1,-1,-1,-1,-1,-1,-1,-1,-1,-1,-1,-1,-1,-1,-1,-1,-1,-1,-1,-1,-1,-1,-1,-1,-1,-1,-1,-1,-1,-1,-1,-1,-1,-1,-1,-1,-1,-1,-1,-1,-1,-1,-1,-1,-1,-1,-1,-1,-1,-1,-1,-1,-1,-1,-1,-1,-1,-1,-1,-1,-1,-1,-1,-1,-1,-1,…	0.359700,0.684105,0.705066,0.379113,0.455369,0.943863,0.643637,0.841836,0.959313,0.651377,0.560433,0.877576,0.086067,0.845392,0.369498,0.000018,0.054229,0.514004,0.820564,0.715219,0.887091,0.990468,0.625352,0.960937,0.611974,0.053758,0.544138,0.943014,0.872166,0.640450,0.112724,0.657920,0.960373,0.515815,0.861266,0.220522,0.561585,0.524972,0.877940,0.000169,0.940811,0.342016,0.439766,0.361223,0.6…	101	123	3656	3878	na	na	0	na	na	0.748903	0.24651	3756	3778	271	4806	0	1	0	-1	0.768298	-1	FALSE
all	EPRS1_A375_gRNA4178	A375	EPRS1	GCCACAAGGAATAATCACCACCT	AGGTGGTGATTATTCCTTGTGGC	ENST00000366923	CAAAACTCCTGGGGCCTGACAACTCGAACTATTGGTGTTATGACCATGGTTCATGGGGACAACATGGGTTTAGTATTACCACCCCGTGTAGCATGTGTTCAGGTGGTGATTATTCCTTGTGGCATTACCAATGCACTTTCTGAAGAAGACAAAGAAGCGCTGATTGCAAAATGCAATGATTATCGAAGGCGATTACTCAGTGTTAACATCCGCGTTAGAGCTG	aacccctaccaactggtcggggtttgaaac	-13.8	((((((.(((....))).))))))(((....((....)).....)))......	-39.55	0.541,0.406,0.541,1,0.406,0.271,0.135,0,0,0,0.134,0.401,0.132,0.264,0,0.396,0.396,1,1,0.91,1,1,0.778,0.389,0.778,0.259,0.389,0.258,0.388,0.517,0.129,0.129,0,0.129,0.129,0.129,0.515,0.77,0.513,0.257,0.513,0.642,0.128,0,0.256,0,0,0.127,0.127,0.127,0,0,0.634,0,0,0.254,0.127,0,-1,-1,-1,-1,-1,-1,-1,-1,-1,-1,-1,-1,-1,-1,0.25,0.25,0.75,0.625,0.375,0.5,0.125,0,0.125,0,0,0.375,0,0.125,0.75,0.375,0.625,1,0…	0.527270,0.638236,0.123195,0.669331,0.992494,0.511299,0.012930,0.292724,0.069568,0.860938,0.809194,0.025502,0.019730,0.972210,0.436652,0.100562,0.059825,0.048853,0.543132,0.085752,0.582628,0.309752,0.538721,0.889941,0.043439,0.761795,0.651697,0.341056,0.938828,0.149030,0.006882,0.049010,0.687935,0.008867,0.397612,0.025357,0.070091,0.051313,0.008400,0.883837,0.235719,0.007540,0.047349,0.005212,0.6…	101	123	4078	4300	na	na	0	na	na	0.833067	0.162345	4178	4200	271	4806	0	1	0	-1	0.861332	-1	FALSE
all	LSM7_A375_gRNA79	A375	LSM7	GACAAGTCCAAGATGCTCTCCTT	AAGGAGAGCATCTTGGACTTGTC	ENST00000252622	GGGAGGTCAAAGGGCGCGGGGCGGTGCCTGCGAAGAGCCACACGGCGCGACAAGATGGCGGATAAGGAGAAGAAGAAAAAGGAGAGCATCTTGGACTTGTCCAAGTACATCGACAAGACGATCCGGGTAAAGTTCCAGGGAGGCCGCGAAGCCAGTGGAATCCTGAAGGGCTTCGACCCACTCCTCAACCTTGTGCTGGAC	aacccctaccaactggtcggggtttgaaac	-12.8	((((((.(((....))).)))))).............................	-39.84	-1,-1,-1,-1,-1,-1,-1,-1,-1,-1,-1,-1,-1,-1,-1,-1,-1,-1,-1,-1,-1,-1,-1,-1,-1,-1,-1,-1,-1,-1,-1,-1,-1,-1,-1,-1,-1,-1,-1,-1,-1,-1,-1,-1,-1,-1,-1,-1,-1,-1,-1,-1,-1,-1,-1,-1,-1,-1,-1,-1,-1,-1,-1,-1,-1,-1,-1,-1,-1,-1,-1,-1,-1,-1,-1,-1,-1,-1,-1,-1,-1,-1,-1,-1,-1,-1,-1,-1,-1,-1,-1,-1,-1,-1,-1,-1,-1,-1,-1,-1,-1,-1,-1,-1,-1,-1,-1,-1,-1,-1,0.346,0.346,0.346,0.269,0.538,0.5,0.577,0.654,0.231,0.423,0.731,0.385…	0.474071,0.150735,0.513719,0.969631,0.215585,0.057392,0.159469,0.270717,0.352040,0.890042,0.058429,0.257572,0.735894,0.985079,0.818623,0.197417,0.567881,0.168154,0.695803,0.206292,0.673484,0.864459,0.266544,0.600344,0.998725,0.816579,0.079819,0.708678,0.228963,0.798519,0.485606,0.566439,0.501116,0.035040,0.158336,0.010946,0.151995,0.233214,0.312993,0.001209,0.468959,0.036143,0.579605,0.343396,0.2…	79	101	1	201	na	na	0	na	na	0.147448	0.809074	79	101	55	363	0	1	0	-1	0.0776699	-1	FALSE
all	LSM7_A375_gRNA82	A375	LSM7	TTGGACAAGTCCAAGATGCTCTC	GAGAGCATCTTGGACTTGTCCAA	ENST00000252622	GGGAGGTCAAAGGGCGCGGGGCGGTGCCTGCGAAGAGCCACACGGCGCGACAAGATGGCGGATAAGGAGAAGAAGAAAAAGGAGAGCATCTTGGACTTGTCCAAGTACATCGACAAGACGATCCGGGTAAAGTTCCAGGGAGGCCGCGAAGCCAGTGGAATCCTGAAGGGCTTCGACCCACTCCTCAACCTTGTGCTGGACGGC	aacccctaccaactggtcggggtttgaaac	-19.2	((((((.(((....))).)))))).....((((((....))))))........	-34.91	-1,-1,-1,-1,-1,-1,-1,-1,-1,-1,-1,-1,-1,-1,-1,-1,-1,-1,-1,-1,-1,-1,-1,-1,-1,-1,-1,-1,-1,-1,-1,-1,-1,-1,-1,-1,-1,-1,-1,-1,-1,-1,-1,-1,-1,-1,-1,-1,-1,-1,-1,-1,-1,-1,-1,-1,-1,-1,-1,-1,-1,-1,-1,-1,-1,-1,-1,-1,-1,-1,-1,-1,-1,-1,-1,-1,-1,-1,-1,-1,-1,-1,-1,-1,-1,-1,-1,-1,-1,-1,-1,-1,-1,-1,-1,-1,-1,-1,-1,-1,-1,-1,-1,-1,-1,-1,-1,-1,-1,-1,0.346,0.346,0.346,0.269,0.538,0.5,0.577,0.654,0.231,0.423,0.731,0.385…	0.485053,0.175756,0.548794,0.943325,0.287728,0.090162,0.117495,0.121645,0.521987,0.899847,0.073753,0.210208,0.833404,0.981896,0.795662,0.210396,0.589797,0.235177,0.774406,0.183295,0.572808,0.825912,0.324680,0.535843,0.997012,0.734852,0.100139,0.807975,0.398251,0.688691,0.198106,0.517385,0.407436,0.049597,0.160431,0.013091,0.185692,0.301373,0.276051,0.001675,0.287842,0.039879,0.449244,0.604042,0.3…	82	104	1	204	na	na	0	na	na	0.153119	0.803403	82	104	55	363	0	1	0	-1	0.0873786	-1	FALSE
all	LSM7_A375_gRNA108	A375	LSM7	TTACCCGGATCGTCTTGTCGATG	CATCGACAAGACGATCCGGGTAA	ENST00000252622	CAAAGGGCGCGGGGCGGTGCCTGCGAAGAGCCACACGGCGCGACAAGATGGCGGATAAGGAGAAGAAGAAAAAGGAGAGCATCTTGGACTTGTCCAAGTACATCGACAAGACGATCCGGGTAAAGTTCCAGGGAGGCCGCGAAGCCAGTGGAATCCTGAAGGGCTTCGACCCACTCCTCAACCTTGTGCTGGACGGCACCATTGAGTACATGCGAGACCCTGA	aacccctaccaactggtcggggtttgaaac	-15.6	((((((.(((....))).))))))..............((((......)))).	-37.93	-1,-1,-1,-1,-1,-1,-1,-1,-1,-1,-1,-1,-1,-1,-1,-1,-1,-1,-1,-1,-1,-1,-1,-1,-1,-1,-1,-1,-1,-1,-1,-1,-1,-1,-1,-1,-1,-1,-1,-1,-1,-1,-1,-1,-1,-1,-1,-1,-1,-1,-1,-1,-1,-1,-1,-1,-1,-1,-1,-1,-1,-1,-1,-1,-1,-1,-1,-1,-1,-1,-1,-1,-1,-1,-1,-1,-1,-1,-1,-1,-1,-1,-1,-1,-1,-1,-1,-1,-1,-1,-1,-1,-1,-1,-1,-1,-1,-1,-1,-1,-1,-1,-1,0.346,0.346,0.346,0.269,0.538,0.5,0.577,0.654,0.231,0.423,0.731,0.385,0.115,0.192,0.115,0.…	0.465683,0.576332,0.776559,0.921892,0.588811,0.197857,0.091340,0.179753,0.801451,0.958210,0.238890,0.435844,0.984232,0.997182,0.929412,0.619306,0.473070,0.349069,0.970648,0.577499,0.466705,0.767486,0.287509,0.761389,0.998638,0.524371,0.527763,0.683705,0.489797,0.641708,0.419298,0.900369,0.712534,0.103905,0.386647,0.107150,0.391434,0.657013,0.203546,0.247451,0.257745,0.101302,0.664030,0.720670,0.6…	101	123	8	230	na	na	0	na	na	0.202268	0.754253	108	130	55	363	0	1	0	-1	0.171521	-1	FALSE
all	LSM7_A375_gRNA215	A375	LSM7	CTGGTCGTCAGGGTCTCGCATGT	ACATGCGAGACCCTGACGACCAG	ENST00000252622	AAGACGATCCGGGTAAAGTTCCAGGGAGGCCGCGAAGCCAGTGGAATCCTGAAGGGCTTCGACCCACTCCTCAACCTTGTGCTGGACGGCACCATTGAGTACATGCGAGACCCTGACGACCAGTACAAGCTCACGGAGGACACCCGGCAGCTGGGCCTCGTGGTGTGCCGGGGCACGTCCGTGGTGCTAATCTGCCCGCAGGACGGCATGGAGGCCATCCCCA	aacccctaccaactggtcggggtttgaaac	-18	((((((.(((....))).))))))(((..((((.....))))...))).....	-45.07	0.538,0.5,0.577,0.654,0.231,0.423,0.731,0.385,0.115,0.192,0.115,0.5,0.231,0.615,0.923,0.654,0.423,0.231,0.769,0.346,0.192,0.692,0.231,0.269,0.192,0.385,0.077,0.192,0.154,0.077,0.115,0.154,0.077,0.038,0.038,0,0,-1,-1,-1,-1,-1,-1,-1,-1,-1,-1,-1,-1,-1,-1,-1,-1,-1,-1,-1,-1,-1,-1,-1,-1,-1,-1,-1,-1,-1,-1,-1,-1,-1,-1,-1,-1,-1,-1,-1,-1,-1,-1,-1,-1,-1,-1,-1,-1,-1,-1,-1,-1,-1,-1,-1,-1,-1,-1,-1,-1,-1,-1,-1,…	0.287248,0.193773,0.746008,0.536196,0.065383,0.100750,0.508378,0.081457,0.634105,0.967234,0.024720,0.157565,0.403567,0.336067,0.899427,0.092329,0.109581,0.084892,0.117936,0.010188,0.440034,0.774194,0.079425,0.414153,0.337256,0.133212,0.017663,0.008760,0.294734,0.065914,0.806012,0.002243,0.602556,0.025669,0.130816,0.003279,0.011768,0.132969,0.137113,0.036565,0.066400,0.347771,0.012755,0.127030,0.6…	101	123	115	337	na	na	0	na	na	0.404537	0.551985	215	237	55	363	0	1	0	-1	0.517799	-1	FALSE
all	LSM7_A375_gRNA230	A375	LSM7	CTCCGTGAGCTTGTACTGGTCGT	ACGACCAGTACAAGCTCACGGAG	ENST00000252622	AAGTTCCAGGGAGGCCGCGAAGCCAGTGGAATCCTGAAGGGCTTCGACCCACTCCTCAACCTTGTGCTGGACGGCACCATTGAGTACATGCGAGACCCTGACGACCAGTACAAGCTCACGGAGGACACCCGGCAGCTGGGCCTCGTGGTGTGCCGGGGCACGTCCGTGGTGCTAATCTGCCCGCAGGACGGCATGGAGGCCATCCCCAACCCCTTCATCCAGC	aacccctaccaactggtcggggtttgaaac	-14.9	((((((.(((....))).))))))....((..(((((......))).))..))	-41.81	0.654,0.423,0.231,0.769,0.346,0.192,0.692,0.231,0.269,0.192,0.385,0.077,0.192,0.154,0.077,0.115,0.154,0.077,0.038,0.038,0,0,-1,-1,-1,-1,-1,-1,-1,-1,-1,-1,-1,-1,-1,-1,-1,-1,-1,-1,-1,-1,-1,-1,-1,-1,-1,-1,-1,-1,-1,-1,-1,-1,-1,-1,-1,-1,-1,-1,-1,-1,-1,-1,-1,-1,-1,-1,-1,-1,-1,-1,-1,-1,-1,-1,-1,-1,-1,-1,-1,-1,-1,-1,-1,-1,-1,-1,-1,-1,-1,-1,-1,-1,0.147,0.184,0.036,0.036,0.182,0.477,0.255,0,0.403,0.437,0.0…	0.276418,0.561398,0.833053,0.646773,0.029472,0.158984,0.517051,0.052928,0.892396,0.983425,0.246309,0.244432,0.568264,0.074762,0.928436,0.108871,0.099646,0.016745,0.330708,0.028248,0.333725,0.506380,0.210851,0.579781,0.673768,0.067227,0.069061,0.009534,0.432761,0.321620,0.977267,0.003077,0.832491,0.041042,0.165891,0.008161,0.013369,0.077615,0.388444,0.078051,0.073358,0.264930,0.039569,0.202073,0.6…	101	123	130	352	na	na	0	na	na	0.432892	0.523629	230	252	55	363	0	1	0	-1	0.566343	-1	FALSE
all	LSM7_A375_gRNA233	A375	LSM7	GTCCTCCGTGAGCTTGTACTGGT	ACCAGTACAAGCTCACGGAGGAC	ENST00000252622	TTCCAGGGAGGCCGCGAAGCCAGTGGAATCCTGAAGGGCTTCGACCCACTCCTCAACCTTGTGCTGGACGGCACCATTGAGTACATGCGAGACCCTGACGACCAGTACAAGCTCACGGAGGACACCCGGCAGCTGGGCCTCGTGGTGTGCCGGGGCACGTCCGTGGTGCTAATCTGCCCGCAGGACGGCATGGAGGCCATCCCCAACCCCTTCATCCAGCAGC	aacccctaccaactggtcggggtttgaaac	-13.8	((((((.(((....))).))))))....(((..(((...)))..)))......	-43.4	0.769,0.346,0.192,0.692,0.231,0.269,0.192,0.385,0.077,0.192,0.154,0.077,0.115,0.154,0.077,0.038,0.038,0,0,-1,-1,-1,-1,-1,-1,-1,-1,-1,-1,-1,-1,-1,-1,-1,-1,-1,-1,-1,-1,-1,-1,-1,-1,-1,-1,-1,-1,-1,-1,-1,-1,-1,-1,-1,-1,-1,-1,-1,-1,-1,-1,-1,-1,-1,-1,-1,-1,-1,-1,-1,-1,-1,-1,-1,-1,-1,-1,-1,-1,-1,-1,-1,-1,-1,-1,-1,-1,-1,-1,-1,-1,0.147,0.184,0.036,0.036,0.182,0.477,0.255,0,0.403,0.437,0.034,0.18,0.253,0.32…	0.182607,0.562692,0.893728,0.809535,0.025128,0.129997,0.432688,0.064979,0.788474,0.984930,0.189003,0.206536,0.677119,0.136343,0.925210,0.169285,0.069039,0.020648,0.246819,0.016669,0.360587,0.487676,0.143684,0.460206,0.677097,0.060372,0.138784,0.004378,0.446860,0.114838,0.977768,0.001738,0.743670,0.070386,0.192273,0.006063,0.013425,0.037471,0.287944,0.254162,0.098551,0.304172,0.074630,0.165887,0.5…	101	123	133	355	na	na	0	na	na	0.438563	0.517958	233	255	55	363	0	1	0	-1	0.576052	-1	FALSE
all	CDC5L_A375_gRNA994	A375	CDC5L	GAAATCTGCGTCAAGAGCTTGGT	ACCAAGCTCTTGACGCAGATTTC	ENST00000371477	CAGAAGAAAAGAAAAAGGAAGAGAGGAGTTGATTATAATGCCGAAATCCCATTTGAAAAAAAGCCTGCCCTTGGTTTTTATGATACTTCTGAGGAAAACTACCAAGCTCTTGACGCAGATTTCAGGAAATTAAGACAACAGGATCTTGATGGGGAGCTAAGATCTGAAAAAGAAGGAAGAGATAGAAAAAAAGACAAACAGCATTTGAAAAGGAAAAAAGAAT	aacccctaccaactggtcggggtttgaaac	-16.3	((((((.(((....))).)))))).....(((..(((......)))..)))..	-38.45	na	0.716155,0.004934,0.081614,0.273405,0.731019,0.243259,0.520964,0.317899,0.464848,0.766409,0.674186,0.002895,0.223716,0.970047,0.749506,0.939996,0.988023,0.648489,0.504093,0.821042,0.915406,0.210691,0.664440,0.817578,0.657712,0.757354,0.447388,0.854276,0.910777,0.192526,0.883335,0.239379,0.166794,0.077348,0.459350,0.473041,0.116090,0.204801,0.018207,0.057110,0.001373,0.195094,0.123138,0.109423,0.5…	101	123	894	1116	na	na	0	na	na	0.154601	0.841818	994	1016	300	2705	0	1	0	-1	0.288446	-1	FALSE
all	CDC5L_A375_gRNA1001	A375	CDC5L	ATTTCCTGAAATCTGCGTCAAGA	TCTTGACGCAGATTTCAGGAAAT	ENST00000371477	AAAGAAAAAGGAAGAGAGGAGTTGATTATAATGCCGAAATCCCATTTGAAAAAAAGCCTGCCCTTGGTTTTTATGATACTTCTGAGGAAAACTACCAAGCTCTTGACGCAGATTTCAGGAAATTAAGACAACAGGATCTTGATGGGGAGCTAAGATCTGAAAAAGAAGGAAGAGATAGAAAAAAAGACAAACAGCATTTGAAAAGGAAAAAAGAATCTGATTT	aacccctaccaactggtcggggtttgaaac	-13.2	((((((.(((....))).)))))).................(((......)))	-31.55	na	0.801200,0.005077,0.163347,0.351593,0.668000,0.200175,0.614357,0.369104,0.724887,0.858484,0.774830,0.008146,0.445665,0.979592,0.804209,0.934098,0.986504,0.644342,0.560431,0.890134,0.922775,0.199702,0.673269,0.774386,0.813560,0.665842,0.380512,0.864917,0.920765,0.279242,0.980631,0.598013,0.204432,0.066524,0.704504,0.580892,0.133810,0.249731,0.018344,0.077029,0.006056,0.196241,0.155145,0.197610,0.5…	101	123	901	1123	na	na	0	na	na	0.15569	0.840729	1001	1023	300	2705	0	1	0	-1	0.291355	-1	FALSE
all	CDC5L_A375_gRNA1293	A375	CDC5L	GACAAAAGTGTACTGGAAGCAGA	TCTGCTTCCAGTACACTTTTGTC	ENST00000371477	TGCCCCTCAGATTTCAGATGCAGAACTCCAGGAAGTTGTAAAAGTAGGCCAAGCGAGTGAAATTGCACGTCAAACTGCCGAGGAATCTGGCATAACAAATTCTGCTTCCAGTACACTTTTGTCTGAGTACAATGTCACCAACAACAGCGTTGCTCTTAGAACACCACGAACACCAGCTTCCCAGGACAGAATTCTGCAGGAAGCCCAGAACCTCATGGCCCTC	aacccctaccaactggtcggggtttgaaac	-14.7	((((((.(((....))).))))))..................(((....))).	-36.48	na	0.538773,0.101659,0.020581,0.829642,0.876205,0.145664,0.115048,0.538395,0.629961,0.862907,0.738984,0.026531,0.072111,0.953747,0.188456,0.935419,0.967637,0.158505,0.018260,0.791418,0.969426,0.382363,0.635572,0.704704,0.637009,0.723887,0.315037,0.807506,0.974997,0.485902,0.968537,0.332726,0.156115,0.184393,0.904215,0.825904,0.127845,0.036788,0.007167,0.456669,0.089490,0.073544,0.151746,0.088687,0.1…	101	123	1193	1415	na	na	0	na	na	0.201152	0.795267	1293	1315	300	2705	0	1	0	-1	0.412718	-1	FALSE
all	CDC5L_A375_gRNA1323	A375	CDC5L	GCAACGCTGTTGTTGGTGACATT	AATGTCACCAACAACAGCGTTGC	ENST00000371477	GGAAGTTGTAAAAGTAGGCCAAGCGAGTGAAATTGCACGTCAAACTGCCGAGGAATCTGGCATAACAAATTCTGCTTCCAGTACACTTTTGTCTGAGTACAATGTCACCAACAACAGCGTTGCTCTTAGAACACCACGAACACCAGCTTCCCAGGACAGAATTCTGCAGGAAGCCCAGAACCTCATGGCCCTCACCAATGTGGACACCCCATTGAAAGGTGGA	aacccctaccaactggtcggggtttgaaac	-17.1	((((((.(((....))).))))))((..((.((((......))))))..))..	-35.05	na	0.280376,0.052410,0.074432,0.933301,0.677881,0.112545,0.118151,0.429724,0.573067,0.735623,0.258318,0.014998,0.146523,0.913483,0.349646,0.813380,0.877195,0.066251,0.196087,0.328363,0.918671,0.330862,0.518888,0.590316,0.228124,0.968880,0.329342,0.730828,0.817511,0.708961,0.829574,0.155633,0.199710,0.097988,0.872347,0.806879,0.022288,0.022060,0.007531,0.324021,0.032594,0.044839,0.126669,0.011788,0.4…	101	123	1223	1445	na	na	0	na	na	0.205823	0.790596	1323	1345	300	2705	0	1	0	-1	0.425187	-1	FALSE
all	CDC5L_A375_gRNA1839	A375	CDC5L	CGAGCATCCACATCAGCAGCATC	GATGCTGCTGATGTGGATGCTCG	ENST00000371477	GTTGGGCCTTCCTGCCCCTAAGAATGATTTTGAAATTGTTCTACCAGAAAATGCCGAGAAGGAGCTGGAAGAACGTGAAATAGATGATACTTACATTGAAGATGCTGCTGATGTGGATGCTCGAAAGCAGGCCATACGAGATGCAGAGCGTGTAAAGGAAATGAAACGAATGCATAAAGCTGTCCAGAAAGATCTGCCAAGACCATCAGAAGTAAATGAAACT	aacccctaccaactggtcggggtttgaaac	-12.8	((((((.(((....))).)))))).............................	-41.91	na	0.964148,0.042730,0.322020,0.945267,0.812370,0.012263,0.408013,0.800063,0.866772,0.999464,0.893096,0.025311,0.452853,0.990425,0.970463,0.979534,0.866740,0.357011,0.655001,0.806769,0.918465,0.154036,0.400339,0.217383,0.962189,0.929618,0.153470,0.885257,0.987155,0.951960,0.975452,0.653404,0.066770,0.022587,0.496188,0.490224,0.568682,0.099049,0.023264,0.485949,0.108232,0.574536,0.203499,0.009282,0.4…	101	123	1739	1961	na	na	0	na	na	0.286159	0.71026	1839	1861	300	2705	0	1	0	-1	0.639651	-1	FALSE
all	CDC5L_A375_gRNA2127	A375	CDC5L	TCCAGATAGGTAATGTGCTCTGA	TCAGAGCACATTACCTATCTGGA	ENST00000371477	AAAAGAAATGATCACAATGCTTCATTATGACCTTCTACATCACCCTTATGAACCATCTGGAAATAAAAAAGGCAAAACTGTAGGGTTTGGTACCAATAATTCAGAGCACATTACCTATCTGGAACATAATCCTTATGAAAAGTTCTCCAAAGAAGAGCTGAAAAAGGCCCAGGATGTTTTGGTGCAGGAGATGGAAGTGGTTAAACAAGGAATGAGCCATGGA	aacccctaccaactggtcggggtttgaaac	-14.8	((((((.(((....))).))))))........((((..(......)..)))).	-34.99	na	0.869776,0.015306,0.561712,0.753346,0.817342,0.225967,0.931248,0.801466,0.437404,0.905464,0.959605,0.017862,0.816912,0.999065,0.827236,0.950892,0.940657,0.930112,0.766815,0.947253,0.939869,0.958753,0.968217,0.922496,0.955890,0.882239,0.704500,0.990415,0.978020,0.153920,0.909521,0.133701,0.377535,0.115378,0.819293,0.572326,0.503543,0.551979,0.045710,0.649590,0.065848,0.020328,0.280336,0.150788,0.1…	101	123	2027	2249	na	na	0	na	na	0.330998	0.665421	2127	2149	300	2705	0	1	0	-1	0.759352	-1	FALSE
all	CFAP298_A375_gRNA869	A375	CFAP298	CTGCACCTCCGCTGGGTACGCAT	ATGCGTACCCAGCGGAGGTGCAG	ENST00000290155	AAGAATTAGCCGAACATGGCATATTTCTCCCTCCTAATATGCAAGGACTGACCGATGATCAGATTGAAGAATTGAAATTGAAGGATGAATGGGGTGAAAAATGCGTACCCAGCGGAGGTGCAGTGTTTAAAAAGGATGATATTGGACGAAGGAATGGGCAAGCTCCAAATGAGAAGATGAAGCAAGTGTTAAAGAAGACTATAGAAGAAGCCAAAGCAATAAT	aacccctaccaactggtcggggtttgaaac	-18	((((((.(((....))).))))))....((((((......)).))))......	-38.57	na	0.976589,0.110440,0.492107,0.968686,0.513274,0.130188,0.962016,0.650078,0.969255,0.873191,0.793053,0.103829,0.655744,0.986552,0.996522,0.977135,0.985798,0.430224,0.895343,0.982445,0.899465,0.256088,0.624932,0.705005,0.999920,0.993903,0.567102,0.989993,0.926430,0.968275,0.998807,0.793240,0.522622,0.317215,0.925046,0.324734,0.980226,0.218758,0.051165,0.702216,0.310211,0.031808,0.650743,0.847874,0.9…	101	123	769	991	na	na	0	na	na	0.513002	0.473404	869	891	624	1493	0	1	0	-1	0.281609	-1	FALSE
all	CFAP298_A375_gRNA1068	A375	CFAP298	ATGGGGTAAACAATCATCACCGC	GCGGTGATGATTGTTTACCCCAT	ENST00000290155	TATAGAAGAAGCCAAAGCAATAATATCTAAGAAACAAGTGGAAGCCGGTGTCTGTGTTACCATGGAGATGGTGAAAGATGCCTTGGACCAGCTTCGAGGCGCGGTGATGATTGTTTACCCCATGGGGTTGCCACCGTATGATCCCATCCGCATGGAGTTTGAAAATAAGGAAGACTTGTCGGGAACACAGGCAGGGCTCAACGTCATTAAAGAGGCAGAGGCG	aacccctaccaactggtcggggtttgaaac	-14.8	((((((.(((....))).))))))........(((((........))).))..	-34.06	na	0.704950,0.403470,0.296193,0.351741,0.148095,0.294516,0.522638,0.476650,0.753925,0.991590,0.975359,0.492543,0.480040,0.971429,0.764160,0.753726,0.953669,0.360326,0.690826,0.806451,0.945399,0.216987,0.439017,0.866595,0.616187,0.054755,0.365570,0.537652,0.670374,0.918874,0.996244,0.351880,0.288444,0.312874,0.770813,0.675839,0.362501,0.192408,0.161236,0.447418,0.344142,0.202455,0.462913,0.512573,0.7…	101	123	968	1190	na	na	0	na	na	0.630615	0.355792	1068	1090	624	1493	0	1	0	-1	0.510345	-1	FALSE
all	CFAP298_A375_gRNA1177	A375	CFAP298	CCACAGCTGCGCCTCTGCCTCTT	AAGAGGCAGAGGCGCAGCTGTGG	ENST00000290155	ATTGTTTACCCCATGGGGTTGCCACCGTATGATCCCATCCGCATGGAGTTTGAAAATAAGGAAGACTTGTCGGGAACACAGGCAGGGCTCAACGTCATTAAAGAGGCAGAGGCGCAGCTGTGGTGGGCAGCCAAGGAGCTGAGAAGAACGAAGAAGCTTTCAGACTACGTGGGGAAGAATGAAAAAACCAAAATTATCGCCAAGATTCAGCAAAGGGGACAGG	aacccctaccaactggtcggggtttgaaac	-13.3	((((((.(((....))).))))))..........((..((......))..)).	-44.85	na	0.859215,0.058573,0.172339,0.748699,0.144076,0.240102,0.787935,0.368405,0.603303,0.974970,0.190385,0.021092,0.869215,0.957711,0.979832,0.979441,0.818018,0.434490,0.837454,0.632013,0.429632,0.227803,0.433933,0.176846,0.930355,0.887992,0.614783,0.336349,0.830721,0.814895,0.772220,0.935561,0.220544,0.236652,0.513091,0.636997,0.608463,0.068153,0.088371,0.210536,0.129815,0.530234,0.331845,0.447602,0.9…	101	123	1077	1299	na	na	0	na	na	0.695035	0.291371	1177	1199	624	1493	0	1	0	-1	0.635632	-1	FALSE
all	CFAP298_A375_gRNA1178	A375	CFAP298	ACCACAGCTGCGCCTCTGCCTCT	AGAGGCAGAGGCGCAGCTGTGGT	ENST00000290155	TTGTTTACCCCATGGGGTTGCCACCGTATGATCCCATCCGCATGGAGTTTGAAAATAAGGAAGACTTGTCGGGAACACAGGCAGGGCTCAACGTCATTAAAGAGGCAGAGGCGCAGCTGTGGTGGGCAGCCAAGGAGCTGAGAAGAACGAAGAAGCTTTCAGACTACGTGGGGAAGAATGAAAAAACCAAAATTATCGCCAAGATTCAGCAAAGGGGACAGGG	aacccctaccaactggtcggggtttgaaac	-13.1	((((((.(((....))).))))))..........(((........))).....	-45.61	na	0.833351,0.060478,0.187650,0.683012,0.197720,0.284695,0.777462,0.308698,0.597599,0.971375,0.148555,0.023844,0.893556,0.960883,0.986782,0.975798,0.822698,0.396083,0.820446,0.548472,0.416827,0.232598,0.475556,0.160043,0.941286,0.860215,0.635384,0.309202,0.837065,0.842017,0.761386,0.961012,0.232166,0.228845,0.503633,0.583800,0.570843,0.069984,0.067156,0.172758,0.156771,0.527406,0.384796,0.311064,0.9…	101	123	1078	1300	na	na	0	na	na	0.695626	0.29078	1178	1200	624	1493	0	1	0	-1	0.636782	-1	FALSE
[truncated: 678 more rows]

## Sheet: Sheet2
model	gRNA_id	cell_line	gene	gRNA_seq	target_seq	transcript_id	extend_target	DR_sequence	gRNA_MFE	DR_gRNA_fold	hybridMFE	icshape_score	protein_binding_p	p1(start_1)	p2	extend_p1	extend_p2	MismatchPosition	MismatchIdentity	Nromalized_LFC	parental_gRNA	parental_gRNA_LFC	start_relative_length	end_pos_relative_length	start_target_to_transcript	end_target_to_transcript	cds_start	cds_end	5utr	cds	3utr	5utr_rate	cds_rate	3utr_rate	control_gene
[truncated: 1,000 more rows]
