# Supplementary material for: Deciphering cellular context for efficient and cell type-specific CRISPR-Cas13d gRNA design using in vivo RNA structure and deep learning
Source: Research Square preprint supplement (doi:10.21203/rs.3.rs-7184055/v1), 2025-09-24
Supplement: Supplementary file 6 [file dc1fd98c92ef1e2a05cbce4f.xlsx]

## Sheet: HEK293FT_vs_A375
transcript_id	start_coordinate	stop_coordinate	L1_distance	genomeCoor_start	genomeCoor_end
ENST00000379370	1535	1563	0.25295	['chr1', 1043339, '+']	['chr1', 1043367, '+']
ENST00000379370	1585	1604	0.23715	['chr1', 1043389, '+']	['chr1', 1043408, '+']
ENST00000379370	1949	1968	0.23125	['chr1', 1043923, '+']	['chr1', 1043942, '+']
ENST00000379370	2001	2026	0.2471	['chr1', 1043975, '+']	['chr1', 1044000, '+']
ENST00000379370	2087	2114	0.2532	['chr1', 1044146, '+']	['chr1', 1044173, '+']
ENST00000379370	2252	2271	0.23185	['chr1', 1044387, '+']	['chr1', 1044406, '+']
ENST00000379370	2540	2561	0.24105	['chr1', 1045477, '+']	['chr1', 1045498, '+']
ENST00000379370	3410	3430	0.2435	['chr1', 1046929, '+']	['chr1', 1046949, '+']
ENST00000379370	3437	3456	0.235	['chr1', 1046956, '+']	['chr1', 1047344, '+']
ENST00000379370	3551	3573	0.249	['chr1', 1047439, '+']	['chr1', 1047579, '+']
ENST00000379370	4745	4772	0.2684	['chr1', 1049746, '+']	['chr1', 1049773, '+']
ENST00000379370	5002	5021	0.24165	['chr1', 1050305, '+']	['chr1', 1050324, '+']
ENST00000379370	5104	5136	0.26515	['chr1', 1050504, '+']	['chr1', 1050536, '+']
ENST00000379370	5163	5183	0.2342	['chr1', 1050563, '+']	['chr1', 1050583, '+']
ENST00000379370	5307	5327	0.24315	['chr1', 1051256, '+']	['chr1', 1051276, '+']
ENST00000620552	1535	1563	0.25295	['chr1', 1043339, '+']	['chr1', 1043367, '+']
ENST00000620552	1585	1604	0.23715	['chr1', 1043389, '+']	['chr1', 1043408, '+']
ENST00000620552	1949	1968	0.23125	['chr1', 1043923, '+']	['chr1', 1043942, '+']
ENST00000620552	2001	2026	0.2471	['chr1', 1043975, '+']	['chr1', 1044000, '+']
ENST00000620552	2087	2114	0.2532	['chr1', 1044146, '+']	['chr1', 1044173, '+']
ENST00000620552	2252	2271	0.23185	['chr1', 1044387, '+']	['chr1', 1044406, '+']
ENST00000620552	2540	2561	0.24105	['chr1', 1045477, '+']	['chr1', 1045498, '+']
ENST00000620552	3410	3430	0.2435	['chr1', 1046929, '+']	['chr1', 1046949, '+']
ENST00000620552	3437	3456	0.235	['chr1', 1046956, '+']	['chr1', 1047344, '+']
ENST00000620552	3551	3573	0.249	['chr1', 1047439, '+']	['chr1', 1047579, '+']
ENST00000620552	4745	4772	0.2684	['chr1', 1049746, '+']	['chr1', 1049773, '+']
ENST00000620552	5002	5021	0.24165	['chr1', 1050305, '+']	['chr1', 1050324, '+']
ENST00000620552	5104	5136	0.26515	['chr1', 1050504, '+']	['chr1', 1050536, '+']
ENST00000620552	5163	5183	0.2342	['chr1', 1050563, '+']	['chr1', 1050583, '+']
ENST00000620552	5307	5339	0.24425	['chr1', 1051035, '+']	['chr1', 1051276, '+']
ENST00000479707	79	100	0.24105	['chr1', 1045477, '+']	['chr1', 1045498, '+']
ENST00000466223	123	144	0.25736	['chr1', 1047323, '+']	['chr1', 1047344, '+']
ENST00000466223	239	261	0.249	['chr1', 1047439, '+']	['chr1', 1047579, '+']
ENST00000419249	1	29	0.264	['chr1', 1050508, '+']	['chr1', 1050536, '+']
ENST00000419249	56	76	0.2342	['chr1', 1050563, '+']	['chr1', 1050583, '+']
ENST00000419249	200	232	0.24425	['chr1', 1051035, '+']	['chr1', 1051276, '+']
ENST00000379198	58	89	0.26764	['chr1', 1232322, '+']	['chr1', 1232353, '+']
ENST00000379198	1136	1161	0.24265	['chr1', 1233400, '+']	['chr1', 1233425, '+']
ENST00000379198	2078	2116	0.2622	['chr1', 1234342, '+']	['chr1', 1234380, '+']
ENST00000379198	2309	2344	0.24155	['chr1', 1234573, '+']	['chr1', 1234608, '+']
ENST00000464957	375	397	0.2326	['chr1', 1327268, '+']	['chr1', 1327290, '+']
ENST00000343938	561	583	0.2326	['chr1', 1327268, '+']	['chr1', 1327290, '+']
ENST00000488011	580	602	0.2326	['chr1', 1327268, '+']	['chr1', 1327290, '+']
ENST00000308647	1690	1714	0.26045	['chr1', 1490631, '+']	['chr1', 1490655, '+']
ENST00000308647	2398	2423	0.25087	['chr1', 1496152, '+']	['chr1', 1496177, '+']
ENST00000472194	1910	1934	0.26045	['chr1', 1490631, '+']	['chr1', 1490655, '+']
ENST00000472194	2618	2637	0.2309	['chr1', 1496152, '+']	['chr1', 1496171, '+']
ENST00000485748	2475	2499	0.26045	['chr1', 1490631, '+']	['chr1', 1490655, '+']
ENST00000485748	3183	3208	0.25087	['chr1', 1496152, '+']	['chr1', 1496177, '+']
ENST00000474481	2610	2634	0.26045	['chr1', 1490631, '+']	['chr1', 1490655, '+']
ENST00000474481	3318	3345	0.26293	['chr1', 1496152, '+']	['chr1', 1496179, '+']
ENST00000520777	373	409	0.336	['chr1', 1623435, '+']	['chr1', 1623471, '+']
ENST00000520777	447	504	0.26925	['chr1', 1623509, '+']	['chr1', 1623566, '+']
ENST00000520777	541	576	0.2442	['chr1', 1623603, '+']	['chr1', 1623638, '+']
ENST00000520777	579	613	0.26055	['chr1', 1623641, '+']	['chr1', 1623675, '+']
ENST00000520777	654	673	0.2375	['chr1', 1623790, '+']	['chr1', 1623809, '+']
ENST00000520777	679	714	0.24835	['chr1', 1623815, '+']	['chr1', 1623850, '+']
ENST00000520777	727	765	0.2889	['chr1', 1623863, '+']	['chr1', 1623901, '+']
ENST00000520777	845	889	0.3644	['chr1', 1624830, '+']	['chr1', 1624874, '+']
ENST00000520777	903	931	0.27069	['chr1', 1624888, '+']	['chr1', 1625005, '+']
ENST00000520777	1144	1176	0.29845	['chr1', 1625318, '+']	['chr1', 1625350, '+']
ENST00000520777	1245	1285	0.304	['chr1', 1625419, '+']	['chr1', 1625588, '+']
ENST00000520777	1322	1364	0.27136	['chr1', 1625625, '+']	['chr1', 1626663, '+']
ENST00000520777	1385	1407	0.2421	['chr1', 1626684, '+']	['chr1', 1626706, '+']
ENST00000520777	1417	1451	0.2804	['chr1', 1626716, '+']	['chr1', 1626750, '+']
ENST00000520777	1471	1498	0.2605	['chr1', 1626852, '+']	['chr1', 1626879, '+']
ENST00000520777	1518	1545	0.2858	['chr1', 1626899, '+']	['chr1', 1626926, '+']
ENST00000520777	1649	1730	0.37725	['chr1', 1627104, '+']	['chr1', 1627185, '+']
ENST00000520777	1977	1996	0.23565	['chr1', 1627748, '+']	['chr1', 1627767, '+']
ENST00000520777	2030	2066	0.28833	['chr1', 1627801, '+']	['chr1', 1628026, '+']
ENST00000520777	2091	2112	0.23765	['chr1', 1628051, '+']	['chr1', 1628072, '+']
ENST00000520777	2266	2285	0.23275	['chr1', 1628319, '+']	['chr1', 1628338, '+']
ENST00000520777	2326	2345	0.2318	['chr1', 1628379, '+']	['chr1', 1628398, '+']
ENST00000520777	2424	2447	0.27155	['chr1', 1628566, '+']	['chr1', 1628589, '+']
ENST00000520777	2457	2478	0.23785	['chr1', 1628599, '+']	['chr1', 1628620, '+']
ENST00000520777	2625	2650	0.24055	['chr1', 1629177, '+']	['chr1', 1629202, '+']
ENST00000520777	2659	2699	0.295	['chr1', 1629211, '+']	['chr1', 1629251, '+']
ENST00000520777	2759	2810	0.291	['chr1', 1629311, '+']	['chr1', 1629435, '+']
ENST00000520777	3043	3075	0.2579	['chr1', 1630327, '+']	['chr1', 1630359, '+']
ENST00000355826	325	361	0.336	['chr1', 1623435, '+']	['chr1', 1623471, '+']
ENST00000355826	399	456	0.26925	['chr1', 1623509, '+']	['chr1', 1623566, '+']
ENST00000355826	493	528	0.2442	['chr1', 1623603, '+']	['chr1', 1623638, '+']
ENST00000355826	531	565	0.26055	['chr1', 1623641, '+']	['chr1', 1623675, '+']
ENST00000355826	606	625	0.2375	['chr1', 1623790, '+']	['chr1', 1623809, '+']
ENST00000355826	631	666	0.24835	['chr1', 1623815, '+']	['chr1', 1623850, '+']
ENST00000355826	679	717	0.2889	['chr1', 1623863, '+']	['chr1', 1623901, '+']
ENST00000355826	797	841	0.3644	['chr1', 1624830, '+']	['chr1', 1624874, '+']
ENST00000355826	855	883	0.27069	['chr1', 1624888, '+']	['chr1', 1625005, '+']
ENST00000355826	1096	1128	0.29845	['chr1', 1625318, '+']	['chr1', 1625350, '+']
ENST00000355826	1206	1249	0.29805	['chr1', 1625428, '+']	['chr1', 1625588, '+']
ENST00000355826	1286	1328	0.27136	['chr1', 1625625, '+']	['chr1', 1626663, '+']
ENST00000355826	1349	1371	0.2421	['chr1', 1626684, '+']	['chr1', 1626706, '+']
ENST00000355826	1381	1415	0.2804	['chr1', 1626716, '+']	['chr1', 1626750, '+']
ENST00000355826	1435	1462	0.2605	['chr1', 1626852, '+']	['chr1', 1626879, '+']
ENST00000355826	1482	1509	0.2858	['chr1', 1626899, '+']	['chr1', 1626926, '+']
ENST00000355826	1613	1694	0.37725	['chr1', 1627104, '+']	['chr1', 1627185, '+']
ENST00000355826	1941	1960	0.23565	['chr1', 1627748, '+']	['chr1', 1627767, '+']
ENST00000355826	1994	2030	0.28833	['chr1', 1627801, '+']	['chr1', 1628026, '+']
ENST00000355826	2055	2076	0.23765	['chr1', 1628051, '+']	['chr1', 1628072, '+']
ENST00000355826	2230	2249	0.23275	['chr1', 1628319, '+']	['chr1', 1628338, '+']
ENST00000355826	2290	2309	0.2318	['chr1', 1628379, '+']	['chr1', 1628398, '+']
ENST00000355826	2388	2411	0.27155	['chr1', 1628566, '+']	['chr1', 1628589, '+']
ENST00000355826	2421	2442	0.23785	['chr1', 1628599, '+']	['chr1', 1628620, '+']
ENST00000355826	2589	2614	0.24055	['chr1', 1629177, '+']	['chr1', 1629202, '+']
ENST00000355826	2623	2663	0.295	['chr1', 1629211, '+']	['chr1', 1629251, '+']
ENST00000355826	2723	2774	0.291	['chr1', 1629311, '+']	['chr1', 1629435, '+']
ENST00000355826	3007	3039	0.2579	['chr1', 1630327, '+']	['chr1', 1630359, '+']
ENST00000518681	351	387	0.336	['chr1', 1623435, '+']	['chr1', 1623471, '+']
ENST00000518681	425	482	0.26925	['chr1', 1623509, '+']	['chr1', 1623566, '+']
ENST00000518681	519	554	0.2442	['chr1', 1623603, '+']	['chr1', 1623638, '+']
ENST00000518681	557	591	0.26055	['chr1', 1623641, '+']	['chr1', 1623675, '+']
ENST00000518681	632	651	0.2375	['chr1', 1623790, '+']	['chr1', 1623809, '+']
ENST00000518681	657	692	0.24835	['chr1', 1623815, '+']	['chr1', 1623850, '+']
ENST00000518681	705	743	0.2889	['chr1', 1623863, '+']	['chr1', 1623901, '+']
ENST00000518681	823	867	0.3644	['chr1', 1624830, '+']	['chr1', 1624874, '+']
ENST00000518681	927	959	0.29845	['chr1', 1625318, '+']	['chr1', 1625350, '+']
ENST00000518681	1037	1080	0.29805	['chr1', 1625428, '+']	['chr1', 1625588, '+']
ENST00000518681	1117	1159	0.27136	['chr1', 1625625, '+']	['chr1', 1626663, '+']
ENST00000518681	1180	1202	0.2421	['chr1', 1626684, '+']	['chr1', 1626706, '+']
ENST00000518681	1212	1246	0.2804	['chr1', 1626716, '+']	['chr1', 1626750, '+']
ENST00000518681	1266	1293	0.2605	['chr1', 1626852, '+']	['chr1', 1626879, '+']
ENST00000518681	1313	1340	0.2858	['chr1', 1626899, '+']	['chr1', 1626926, '+']
ENST00000518681	1444	1525	0.37725	['chr1', 1627104, '+']	['chr1', 1627185, '+']
ENST00000518681	1772	1791	0.23565	['chr1', 1627748, '+']	['chr1', 1627767, '+']
ENST00000518681	1825	1861	0.28833	['chr1', 1627801, '+']	['chr1', 1628026, '+']
ENST00000518681	1886	1907	0.23765	['chr1', 1628051, '+']	['chr1', 1628072, '+']
ENST00000518681	2061	2080	0.23275	['chr1', 1628319, '+']	['chr1', 1628338, '+']
ENST00000518681	2121	2140	0.2318	['chr1', 1628379, '+']	['chr1', 1628398, '+']
ENST00000518681	2219	2242	0.27155	['chr1', 1628566, '+']	['chr1', 1628589, '+']
ENST00000518681	2252	2273	0.23785	['chr1', 1628599, '+']	['chr1', 1628620, '+']
ENST00000518681	2420	2445	0.24055	['chr1', 1629177, '+']	['chr1', 1629202, '+']
ENST00000518681	2454	2494	0.295	['chr1', 1629211, '+']	['chr1', 1629251, '+']
ENST00000518681	2554	2605	0.291	['chr1', 1629311, '+']	['chr1', 1629435, '+']
ENST00000518681	2838	2870	0.2579	['chr1', 1630327, '+']	['chr1', 1630359, '+']
ENST00000505820	345	381	0.336	['chr1', 1623435, '+']	['chr1', 1623471, '+']
ENST00000505820	419	476	0.26925	['chr1', 1623509, '+']	['chr1', 1623566, '+']
ENST00000505820	513	548	0.2442	['chr1', 1623603, '+']	['chr1', 1623638, '+']
ENST00000505820	551	585	0.26055	['chr1', 1623641, '+']	['chr1', 1623675, '+']
ENST00000505820	626	645	0.2375	['chr1', 1623790, '+']	['chr1', 1623809, '+']
ENST00000505820	651	686	0.24835	['chr1', 1623815, '+']	['chr1', 1623850, '+']
ENST00000505820	699	737	0.2889	['chr1', 1623863, '+']	['chr1', 1623901, '+']
ENST00000505820	817	861	0.3644	['chr1', 1624830, '+']	['chr1', 1624874, '+']
ENST00000505820	875	903	0.27069	['chr1', 1624888, '+']	['chr1', 1625005, '+']
ENST00000505820	1116	1148	0.29845	['chr1', 1625318, '+']	['chr1', 1625350, '+']
ENST00000505820	1226	1269	0.29805	['chr1', 1625428, '+']	['chr1', 1625588, '+']
ENST00000505820	1306	1348	0.27136	['chr1', 1625625, '+']	['chr1', 1626663, '+']
ENST00000505820	1369	1391	0.2421	['chr1', 1626684, '+']	['chr1', 1626706, '+']
ENST00000505820	1401	1435	0.2804	['chr1', 1626716, '+']	['chr1', 1626750, '+']
ENST00000505820	1455	1482	0.2605	['chr1', 1626852, '+']	['chr1', 1626879, '+']
ENST00000505820	1502	1529	0.2858	['chr1', 1626899, '+']	['chr1', 1626926, '+']
ENST00000505820	1633	1714	0.37725	['chr1', 1627104, '+']	['chr1', 1627185, '+']
ENST00000505820	1961	1980	0.23565	['chr1', 1627748, '+']	['chr1', 1627767, '+']
ENST00000505820	2014	2050	0.28833	['chr1', 1627801, '+']	['chr1', 1628026, '+']
ENST00000505820	2075	2096	0.23765	['chr1', 1628051, '+']	['chr1', 1628072, '+']
ENST00000505820	2250	2269	0.23275	['chr1', 1628319, '+']	['chr1', 1628338, '+']
ENST00000505820	2310	2329	0.2318	['chr1', 1628379, '+']	['chr1', 1628398, '+']
ENST00000505820	2408	2431	0.27155	['chr1', 1628566, '+']	['chr1', 1628589, '+']
ENST00000505820	2441	2462	0.23785	['chr1', 1628599, '+']	['chr1', 1628620, '+']
ENST00000505820	2609	2634	0.24055	['chr1', 1629177, '+']	['chr1', 1629202, '+']
ENST00000505820	2643	2683	0.295	['chr1', 1629211, '+']	['chr1', 1629251, '+']
ENST00000505820	2743	2794	0.291	['chr1', 1629311, '+']	['chr1', 1629435, '+']
ENST00000505820	3027	3059	0.2579	['chr1', 1630327, '+']	['chr1', 1630359, '+']
ENST00000479659	292	328	0.336	['chr1', 1623435, '+']	['chr1', 1623471, '+']
ENST00000479659	366	423	0.26925	['chr1', 1623509, '+']	['chr1', 1623566, '+']
ENST00000479659	460	495	0.2442	['chr1', 1623603, '+']	['chr1', 1623638, '+']
ENST00000479659	498	532	0.26055	['chr1', 1623641, '+']	['chr1', 1623675, '+']
ENST00000479659	573	592	0.2375	['chr1', 1623790, '+']	['chr1', 1623809, '+']
ENST00000479659	598	633	0.24835	['chr1', 1623815, '+']	['chr1', 1623850, '+']
ENST00000479659	646	684	0.2889	['chr1', 1623863, '+']	['chr1', 1623901, '+']
ENST00000479659	764	808	0.3644	['chr1', 1624830, '+']	['chr1', 1624874, '+']
ENST00000479659	822	850	0.27069	['chr1', 1624888, '+']	['chr1', 1625005, '+']
ENST00000479659	1063	1095	0.29845	['chr1', 1625318, '+']	['chr1', 1625350, '+']
ENST00000479659	1173	1216	0.29805	['chr1', 1625428, '+']	['chr1', 1625588, '+']
ENST00000479659	1253	1284	0.23425	['chr1', 1625625, '+']	['chr1', 1625656, '+']
ENST00000479659	2312	2334	0.2421	['chr1', 1626684, '+']	['chr1', 1626706, '+']
ENST00000479659	2344	2378	0.2804	['chr1', 1626716, '+']	['chr1', 1626750, '+']
ENST00000479659	2398	2425	0.2605	['chr1', 1626852, '+']	['chr1', 1626879, '+']
ENST00000479659	2445	2472	0.2858	['chr1', 1626899, '+']	['chr1', 1626926, '+']
ENST00000479659	2576	2657	0.37725	['chr1', 1627104, '+']	['chr1', 1627185, '+']
ENST00000479659	2904	2923	0.23565	['chr1', 1627748, '+']	['chr1', 1627767, '+']
ENST00000479659	2957	2993	0.28833	['chr1', 1627801, '+']	['chr1', 1628026, '+']
ENST00000479659	3018	3039	0.23765	['chr1', 1628051, '+']	['chr1', 1628072, '+']
ENST00000479659	3193	3212	0.23275	['chr1', 1628319, '+']	['chr1', 1628338, '+']
ENST00000479659	3253	3272	0.2318	['chr1', 1628379, '+']	['chr1', 1628398, '+']
ENST00000479659	3351	3374	0.27155	['chr1', 1628566, '+']	['chr1', 1628589, '+']
ENST00000479659	3384	3405	0.23785	['chr1', 1628599, '+']	['chr1', 1628620, '+']
ENST00000479659	3552	3577	0.24055	['chr1', 1629177, '+']	['chr1', 1629202, '+']
ENST00000479659	3586	3626	0.295	['chr1', 1629211, '+']	['chr1', 1629251, '+']
ENST00000479659	3686	3737	0.291	['chr1', 1629311, '+']	['chr1', 1629435, '+']
ENST00000479659	3970	4002	0.2579	['chr1', 1630327, '+']	['chr1', 1630359, '+']
ENST00000489635	292	354	0.38109	['chr1', 1623435, '+']	['chr1', 1623788, '+']
ENST00000489635	356	375	0.2375	['chr1', 1623790, '+']	['chr1', 1623809, '+']
ENST00000489635	381	416	0.24835	['chr1', 1623815, '+']	['chr1', 1623850, '+']
ENST00000489635	429	467	0.2889	['chr1', 1623863, '+']	['chr1', 1623901, '+']
ENST00000489635	547	591	0.3644	['chr1', 1624830, '+']	['chr1', 1624874, '+']
ENST00000489635	605	633	0.27069	['chr1', 1624888, '+']	['chr1', 1625005, '+']
ENST00000489635	846	878	0.29845	['chr1', 1625318, '+']	['chr1', 1625350, '+']
ENST00000489635	956	999	0.29805	['chr1', 1625428, '+']	['chr1', 1625588, '+']
ENST00000489635	1036	1078	0.27136	['chr1', 1625625, '+']	['chr1', 1626663, '+']
ENST00000489635	1099	1121	0.2421	['chr1', 1626684, '+']	['chr1', 1626706, '+']
ENST00000489635	1131	1165	0.2804	['chr1', 1626716, '+']	['chr1', 1626750, '+']
ENST00000489635	1185	1212	0.2605	['chr1', 1626852, '+']	['chr1', 1626879, '+']
ENST00000489635	1232	1259	0.2858	['chr1', 1626899, '+']	['chr1', 1626926, '+']
ENST00000489635	1363	1444	0.37725	['chr1', 1627104, '+']	['chr1', 1627185, '+']
ENST00000489635	1691	1710	0.23565	['chr1', 1627748, '+']	['chr1', 1627767, '+']
ENST00000489635	1744	1780	0.28833	['chr1', 1627801, '+']	['chr1', 1628026, '+']
ENST00000489635	1805	1826	0.23765	['chr1', 1628051, '+']	['chr1', 1628072, '+']
ENST00000489635	1980	1999	0.23275	['chr1', 1628319, '+']	['chr1', 1628338, '+']
ENST00000489635	2040	2059	0.2318	['chr1', 1628379, '+']	['chr1', 1628398, '+']
ENST00000489635	2138	2161	0.27155	['chr1', 1628566, '+']	['chr1', 1628589, '+']
ENST00000489635	2171	2192	0.23785	['chr1', 1628599, '+']	['chr1', 1628620, '+']
ENST00000489635	2339	2364	0.24055	['chr1', 1629177, '+']	['chr1', 1629202, '+']
ENST00000489635	2373	2413	0.295	['chr1', 1629211, '+']	['chr1', 1629251, '+']
ENST00000489635	2473	2524	0.291	['chr1', 1629311, '+']	['chr1', 1629435, '+']
ENST00000489635	2757	2789	0.2579	['chr1', 1630327, '+']	['chr1', 1630359, '+']
ENST00000511502	274	310	0.336	['chr1', 1623435, '+']	['chr1', 1623471, '+']
ENST00000511502	348	405	0.26925	['chr1', 1623509, '+']	['chr1', 1623566, '+']
ENST00000511502	442	477	0.2442	['chr1', 1623603, '+']	['chr1', 1623638, '+']
ENST00000511502	480	514	0.26055	['chr1', 1623641, '+']	['chr1', 1623675, '+']
ENST00000511502	555	574	0.2375	['chr1', 1623790, '+']	['chr1', 1623809, '+']
ENST00000511502	580	615	0.24835	['chr1', 1623815, '+']	['chr1', 1623850, '+']
ENST00000511502	628	666	0.2889	['chr1', 1623863, '+']	['chr1', 1623901, '+']
ENST00000511502	746	790	0.3644	['chr1', 1624830, '+']	['chr1', 1624874, '+']
ENST00000511502	804	832	0.27069	['chr1', 1624888, '+']	['chr1', 1625005, '+']
ENST00000511502	1045	1077	0.29845	['chr1', 1625318, '+']	['chr1', 1625350, '+']
ENST00000511502	1155	1198	0.29805	['chr1', 1625428, '+']	['chr1', 1625588, '+']
ENST00000511502	1235	1277	0.27136	['chr1', 1625625, '+']	['chr1', 1626663, '+']
ENST00000511502	1298	1320	0.2421	['chr1', 1626684, '+']	['chr1', 1626706, '+']
ENST00000511502	1330	1364	0.2804	['chr1', 1626716, '+']	['chr1', 1626750, '+']
ENST00000511502	1384	1411	0.2605	['chr1', 1626852, '+']	['chr1', 1626879, '+']
ENST00000511502	1431	1458	0.2858	['chr1', 1626899, '+']	['chr1', 1626926, '+']
ENST00000511502	1562	1643	0.37725	['chr1', 1627104, '+']	['chr1', 1627185, '+']
ENST00000511502	1890	1909	0.23565	['chr1', 1627748, '+']	['chr1', 1627767, '+']
ENST00000511502	1943	1979	0.28833	['chr1', 1627801, '+']	['chr1', 1628026, '+']
ENST00000511502	2004	2025	0.23765	['chr1', 1628051, '+']	['chr1', 1628072, '+']
ENST00000511502	2272	2291	0.23275	['chr1', 1628319, '+']	['chr1', 1628338, '+']
ENST00000511502	2332	2351	0.2318	['chr1', 1628379, '+']	['chr1', 1628398, '+']
ENST00000511502	2430	2453	0.27155	['chr1', 1628566, '+']	['chr1', 1628589, '+']
ENST00000511502	2463	2484	0.23785	['chr1', 1628599, '+']	['chr1', 1628620, '+']
ENST00000511502	2631	2656	0.24055	['chr1', 1629177, '+']	['chr1', 1629202, '+']
ENST00000511502	2665	2705	0.295	['chr1', 1629211, '+']	['chr1', 1629251, '+']
ENST00000511502	2765	2816	0.291	['chr1', 1629311, '+']	['chr1', 1629435, '+']
ENST00000511502	3049	3081	0.2579	['chr1', 1630327, '+']	['chr1', 1630359, '+']
ENST00000487053	376	412	0.336	['chr1', 1623435, '+']	['chr1', 1623471, '+']
ENST00000487053	450	507	0.26925	['chr1', 1623509, '+']	['chr1', 1623566, '+']
ENST00000487053	544	579	0.2442	['chr1', 1623603, '+']	['chr1', 1623638, '+']
ENST00000487053	582	616	0.26055	['chr1', 1623641, '+']	['chr1', 1623675, '+']
ENST00000487053	657	676	0.2375	['chr1', 1623790, '+']	['chr1', 1623809, '+']
ENST00000487053	682	717	0.24835	['chr1', 1623815, '+']	['chr1', 1623850, '+']
ENST00000487053	730	768	0.2889	['chr1', 1623863, '+']	['chr1', 1623901, '+']
ENST00000487053	848	892	0.3644	['chr1', 1624830, '+']	['chr1', 1624874, '+']
ENST00000487053	906	934	0.27069	['chr1', 1624888, '+']	['chr1', 1625005, '+']
ENST00000487053	1147	1179	0.29845	['chr1', 1625318, '+']	['chr1', 1625350, '+']
ENST00000487053	1257	1300	0.29805	['chr1', 1625428, '+']	['chr1', 1625588, '+']
ENST00000487053	1337	1379	0.27136	['chr1', 1625625, '+']	['chr1', 1626663, '+']
ENST00000487053	1400	1422	0.2421	['chr1', 1626684, '+']	['chr1', 1626706, '+']
ENST00000487053	1432	1466	0.2804	['chr1', 1626716, '+']	['chr1', 1626750, '+']
ENST00000487053	1486	1513	0.2605	['chr1', 1626852, '+']	['chr1', 1626879, '+']
ENST00000487053	1533	1560	0.2858	['chr1', 1626899, '+']	['chr1', 1626926, '+']
ENST00000487053	1664	1745	0.37725	['chr1', 1627104, '+']	['chr1', 1627185, '+']
ENST00000487053	1992	2011	0.23565	['chr1', 1627748, '+']	['chr1', 1627767, '+']
ENST00000487053	2045	2081	0.28833	['chr1', 1627801, '+']	['chr1', 1628026, '+']
ENST00000487053	2106	2127	0.23765	['chr1', 1628051, '+']	['chr1', 1628072, '+']
ENST00000487053	2281	2300	0.23275	['chr1', 1628319, '+']	['chr1', 1628338, '+']
ENST00000487053	2341	2360	0.2318	['chr1', 1628379, '+']	['chr1', 1628398, '+']
ENST00000487053	2439	2462	0.27155	['chr1', 1628566, '+']	['chr1', 1628589, '+']
ENST00000487053	2472	2493	0.23785	['chr1', 1628599, '+']	['chr1', 1628620, '+']
ENST00000487053	2640	2665	0.24055	['chr1', 1629177, '+']	['chr1', 1629202, '+']
ENST00000487053	2674	2714	0.295	['chr1', 1629211, '+']	['chr1', 1629251, '+']
ENST00000487053	2774	2803	0.33564	['chr1', 1629311, '+']	['chr1', 1629496, '+']
ENST00000487053	2975	3007	0.2579	['chr1', 1630327, '+']	['chr1', 1630359, '+']
ENST00000378712	308	344	0.336	['chr1', 1623435, '+']	['chr1', 1623471, '+']
ENST00000378712	382	439	0.26925	['chr1', 1623509, '+']	['chr1', 1623566, '+']
ENST00000378712	476	511	0.2442	['chr1', 1623603, '+']	['chr1', 1623638, '+']
ENST00000378712	514	548	0.26055	['chr1', 1623641, '+']	['chr1', 1623675, '+']
ENST00000378712	589	608	0.2375	['chr1', 1623790, '+']	['chr1', 1623809, '+']
ENST00000378712	614	649	0.24835	['chr1', 1623815, '+']	['chr1', 1623850, '+']
ENST00000378712	662	700	0.2889	['chr1', 1623863, '+']	['chr1', 1623901, '+']
ENST00000378712	780	824	0.3644	['chr1', 1624830, '+']	['chr1', 1624874, '+']
ENST00000378712	884	916	0.29845	['chr1', 1625318, '+']	['chr1', 1625350, '+']
ENST00000378712	994	1037	0.29805	['chr1', 1625428, '+']	['chr1', 1625588, '+']
ENST00000378712	1074	1116	0.27136	['chr1', 1625625, '+']	['chr1', 1626663, '+']
ENST00000378712	1137	1159	0.2421	['chr1', 1626684, '+']	['chr1', 1626706, '+']
ENST00000378712	1169	1203	0.2804	['chr1', 1626716, '+']	['chr1', 1626750, '+']
ENST00000378712	1223	1250	0.2605	['chr1', 1626852, '+']	['chr1', 1626879, '+']
ENST00000378712	1270	1297	0.2858	['chr1', 1626899, '+']	['chr1', 1626926, '+']
ENST00000378712	1401	1482	0.37725	['chr1', 1627104, '+']	['chr1', 1627185, '+']
ENST00000378712	1729	1748	0.23565	['chr1', 1627748, '+']	['chr1', 1627767, '+']
ENST00000378712	1782	1818	0.28833	['chr1', 1627801, '+']	['chr1', 1628026, '+']
ENST00000378712	1843	1864	0.23765	['chr1', 1628051, '+']	['chr1', 1628072, '+']
ENST00000378712	2018	2037	0.23275	['chr1', 1628319, '+']	['chr1', 1628338, '+']
ENST00000378712	2078	2097	0.2318	['chr1', 1628379, '+']	['chr1', 1628398, '+']
ENST00000378712	2176	2199	0.27155	['chr1', 1628566, '+']	['chr1', 1628589, '+']
ENST00000378712	2209	2230	0.23785	['chr1', 1628599, '+']	['chr1', 1628620, '+']
ENST00000378712	2377	2402	0.24055	['chr1', 1629177, '+']	['chr1', 1629202, '+']
ENST00000378712	2411	2451	0.295	['chr1', 1629211, '+']	['chr1', 1629251, '+']
ENST00000378712	2613	2645	0.2579	['chr1', 1630327, '+']	['chr1', 1630359, '+']
ENST00000504599	352	388	0.336	['chr1', 1623435, '+']	['chr1', 1623471, '+']
ENST00000504599	426	483	0.26925	['chr1', 1623509, '+']	['chr1', 1623566, '+']
ENST00000504599	520	555	0.2442	['chr1', 1623603, '+']	['chr1', 1623638, '+']
ENST00000504599	558	592	0.26055	['chr1', 1623641, '+']	['chr1', 1623675, '+']
ENST00000504599	633	652	0.2375	['chr1', 1623790, '+']	['chr1', 1623809, '+']
ENST00000504599	658	693	0.24835	['chr1', 1623815, '+']	['chr1', 1623850, '+']
ENST00000504599	706	744	0.2889	['chr1', 1623863, '+']	['chr1', 1623901, '+']
ENST00000504599	824	868	0.3644	['chr1', 1624830, '+']	['chr1', 1624874, '+']
ENST00000504599	882	910	0.27069	['chr1', 1624888, '+']	['chr1', 1625005, '+']
ENST00000504599	1123	1155	0.29845	['chr1', 1625318, '+']	['chr1', 1625350, '+']
ENST00000504599	1233	1276	0.29805	['chr1', 1625428, '+']	['chr1', 1625588, '+']
ENST00000504599	1313	1355	0.27136	['chr1', 1625625, '+']	['chr1', 1626663, '+']
ENST00000504599	1376	1398	0.2421	['chr1', 1626684, '+']	['chr1', 1626706, '+']
ENST00000504599	1408	1442	0.2804	['chr1', 1626716, '+']	['chr1', 1626750, '+']
ENST00000504599	1462	1489	0.2605	['chr1', 1626852, '+']	['chr1', 1626879, '+']
ENST00000504599	1509	1536	0.2858	['chr1', 1626899, '+']	['chr1', 1626926, '+']
ENST00000504599	1640	1721	0.37725	['chr1', 1627104, '+']	['chr1', 1627185, '+']
ENST00000504599	1968	1987	0.23565	['chr1', 1627748, '+']	['chr1', 1627767, '+']
ENST00000504599	2021	2057	0.28833	['chr1', 1627801, '+']	['chr1', 1628026, '+']
ENST00000504599	2082	2103	0.23765	['chr1', 1628051, '+']	['chr1', 1628072, '+']
ENST00000504599	2257	2276	0.23275	['chr1', 1628319, '+']	['chr1', 1628338, '+']
ENST00000504599	2317	2336	0.2318	['chr1', 1628379, '+']	['chr1', 1628398, '+']
ENST00000504599	2415	2438	0.27155	['chr1', 1628566, '+']	['chr1', 1628589, '+']
ENST00000504599	2448	2469	0.23785	['chr1', 1628599, '+']	['chr1', 1628620, '+']
ENST00000504599	2616	2641	0.24055	['chr1', 1629177, '+']	['chr1', 1629202, '+']
ENST00000504599	2650	2690	0.295	['chr1', 1629211, '+']	['chr1', 1629251, '+']
ENST00000504599	2750	2801	0.291	['chr1', 1629311, '+']	['chr1', 1629435, '+']
ENST00000504599	3034	3066	0.2579	['chr1', 1630327, '+']	['chr1', 1630359, '+']
ENST00000507229	351	387	0.336	['chr1', 1623435, '+']	['chr1', 1623471, '+']
ENST00000507229	425	482	0.26925	['chr1', 1623509, '+']	['chr1', 1623566, '+']
ENST00000507229	519	554	0.2442	['chr1', 1623603, '+']	['chr1', 1623638, '+']
ENST00000507229	557	591	0.26055	['chr1', 1623641, '+']	['chr1', 1623675, '+']
ENST00000507229	632	651	0.2375	['chr1', 1623790, '+']	['chr1', 1623809, '+']
ENST00000507229	657	692	0.24835	['chr1', 1623815, '+']	['chr1', 1623850, '+']
ENST00000507229	705	743	0.2889	['chr1', 1623863, '+']	['chr1', 1623901, '+']
ENST00000507229	823	867	0.3644	['chr1', 1624830, '+']	['chr1', 1624874, '+']
ENST00000507229	881	909	0.27069	['chr1', 1624888, '+']	['chr1', 1625005, '+']
ENST00000507229	1122	1154	0.29845	['chr1', 1625318, '+']	['chr1', 1625350, '+']
ENST00000507229	1267	1289	0.2421	['chr1', 1626684, '+']	['chr1', 1626706, '+']
ENST00000507229	1299	1333	0.2804	['chr1', 1626716, '+']	['chr1', 1626750, '+']
ENST00000507229	1353	1380	0.2605	['chr1', 1626852, '+']	['chr1', 1626879, '+']
ENST00000507229	1400	1427	0.2858	['chr1', 1626899, '+']	['chr1', 1626926, '+']
ENST00000507229	1531	1612	0.37725	['chr1', 1627104, '+']	['chr1', 1627185, '+']
ENST00000507229	1859	1878	0.23565	['chr1', 1627748, '+']	['chr1', 1627767, '+']
ENST00000507229	1912	1948	0.28833	['chr1', 1627801, '+']	['chr1', 1628026, '+']
ENST00000507229	1973	1994	0.23765	['chr1', 1628051, '+']	['chr1', 1628072, '+']
ENST00000507229	2148	2167	0.23275	['chr1', 1628319, '+']	['chr1', 1628338, '+']
ENST00000507229	2208	2237	0.27386	['chr1', 1628379, '+']	['chr1', 1628408, '+']
ENST00000507229	2395	2418	0.27155	['chr1', 1628566, '+']	['chr1', 1628589, '+']
ENST00000507229	2428	2449	0.23785	['chr1', 1628599, '+']	['chr1', 1628620, '+']
ENST00000378708	161	197	0.336	['chr1', 1623435, '+']	['chr1', 1623471, '+']
ENST00000378708	235	292	0.26925	['chr1', 1623509, '+']	['chr1', 1623566, '+']
ENST00000378708	329	364	0.2442	['chr1', 1623603, '+']	['chr1', 1623638, '+']
ENST00000378708	367	401	0.26055	['chr1', 1623641, '+']	['chr1', 1623675, '+']
ENST00000378708	442	461	0.2375	['chr1', 1623790, '+']	['chr1', 1623809, '+']
ENST00000378708	467	502	0.24835	['chr1', 1623815, '+']	['chr1', 1623850, '+']
ENST00000378708	515	553	0.2889	['chr1', 1623863, '+']	['chr1', 1623901, '+']
ENST00000378708	633	677	0.3644	['chr1', 1624830, '+']	['chr1', 1624874, '+']
ENST00000378708	691	719	0.27069	['chr1', 1624888, '+']	['chr1', 1625005, '+']
ENST00000378708	932	964	0.29845	['chr1', 1625318, '+']	['chr1', 1625350, '+']
ENST00000378708	1077	1099	0.2421	['chr1', 1626684, '+']	['chr1', 1626706, '+']
ENST00000378708	1109	1143	0.2804	['chr1', 1626716, '+']	['chr1', 1626750, '+']
ENST00000378708	1163	1190	0.2605	['chr1', 1626852, '+']	['chr1', 1626879, '+']
ENST00000378708	1210	1237	0.2858	['chr1', 1626899, '+']	['chr1', 1626926, '+']
ENST00000378708	1341	1422	0.37725	['chr1', 1627104, '+']	['chr1', 1627185, '+']
ENST00000378708	1669	1688	0.23565	['chr1', 1627748, '+']	['chr1', 1627767, '+']
ENST00000378708	1722	1758	0.28833	['chr1', 1627801, '+']	['chr1', 1628026, '+']
ENST00000378708	1783	1804	0.23765	['chr1', 1628051, '+']	['chr1', 1628072, '+']
ENST00000378708	1958	1977	0.23275	['chr1', 1628319, '+']	['chr1', 1628338, '+']
ENST00000378708	2018	2037	0.2318	['chr1', 1628379, '+']	['chr1', 1628398, '+']
ENST00000378708	2116	2139	0.27155	['chr1', 1628566, '+']	['chr1', 1628589, '+']
ENST00000378708	2149	2170	0.23785	['chr1', 1628599, '+']	['chr1', 1628620, '+']
ENST00000378708	2317	2342	0.24055	['chr1', 1629177, '+']	['chr1', 1629202, '+']
ENST00000378708	2351	2391	0.295	['chr1', 1629211, '+']	['chr1', 1629251, '+']
ENST00000378708	2451	2502	0.291	['chr1', 1629311, '+']	['chr1', 1629435, '+']
ENST00000378708	2735	2767	0.2579	['chr1', 1630327, '+']	['chr1', 1630359, '+']
ENST00000506488	144	180	0.336	['chr1', 1623435, '+']	['chr1', 1623471, '+']
ENST00000506488	218	275	0.26925	['chr1', 1623509, '+']	['chr1', 1623566, '+']
ENST00000506488	312	347	0.2442	['chr1', 1623603, '+']	['chr1', 1623638, '+']
ENST00000506488	350	384	0.26055	['chr1', 1623641, '+']	['chr1', 1623675, '+']
ENST00000506488	425	444	0.2375	['chr1', 1623790, '+']	['chr1', 1623809, '+']
ENST00000506488	450	485	0.24835	['chr1', 1623815, '+']	['chr1', 1623850, '+']
ENST00000506488	498	536	0.2889	['chr1', 1623863, '+']	['chr1', 1623901, '+']
ENST00000506488	616	660	0.3644	['chr1', 1624830, '+']	['chr1', 1624874, '+']
ENST00000506488	674	702	0.27069	['chr1', 1624888, '+']	['chr1', 1625005, '+']
ENST00000506488	915	947	0.29845	['chr1', 1625318, '+']	['chr1', 1625350, '+']
ENST00000506488	1060	1082	0.2421	['chr1', 1626684, '+']	['chr1', 1626706, '+']
ENST00000506488	1092	1126	0.2804	['chr1', 1626716, '+']	['chr1', 1626750, '+']
ENST00000506488	1146	1173	0.2605	['chr1', 1626852, '+']	['chr1', 1626879, '+']
ENST00000506488	1193	1220	0.2858	['chr1', 1626899, '+']	['chr1', 1626926, '+']
ENST00000506488	1398	1479	0.37725	['chr1', 1627104, '+']	['chr1', 1627185, '+']
ENST00000506488	1726	1745	0.23565	['chr1', 1627748, '+']	['chr1', 1627767, '+']
ENST00000506488	1779	1815	0.28833	['chr1', 1627801, '+']	['chr1', 1628026, '+']
ENST00000506488	1840	1861	0.23765	['chr1', 1628051, '+']	['chr1', 1628072, '+']
ENST00000506488	2015	2034	0.23275	['chr1', 1628319, '+']	['chr1', 1628338, '+']
ENST00000506488	2075	2094	0.2318	['chr1', 1628379, '+']	['chr1', 1628398, '+']
ENST00000506488	2173	2196	0.27155	['chr1', 1628566, '+']	['chr1', 1628589, '+']
ENST00000506488	2206	2227	0.23785	['chr1', 1628599, '+']	['chr1', 1628620, '+']
ENST00000506488	2374	2399	0.24055	['chr1', 1629177, '+']	['chr1', 1629202, '+']
ENST00000506488	2408	2448	0.295	['chr1', 1629211, '+']	['chr1', 1629251, '+']
ENST00000506488	2508	2559	0.291	['chr1', 1629311, '+']	['chr1', 1629435, '+']
ENST00000506488	2792	2824	0.2579	['chr1', 1630327, '+']	['chr1', 1630359, '+']
ENST00000514234	14	49	0.24835	['chr1', 1623815, '+']	['chr1', 1623850, '+']
ENST00000514234	62	100	0.2889	['chr1', 1623863, '+']	['chr1', 1623901, '+']
ENST00000514234	180	224	0.3644	['chr1', 1624830, '+']	['chr1', 1624874, '+']
ENST00000514234	238	266	0.27069	['chr1', 1624888, '+']	['chr1', 1625005, '+']
ENST00000514234	479	511	0.29845	['chr1', 1625318, '+']	['chr1', 1625350, '+']
ENST00000514234	589	632	0.29805	['chr1', 1625428, '+']	['chr1', 1625588, '+']
ENST00000514234	669	688	0.23425	['chr1', 1625625, '+']	['chr1', 1625644, '+']
ENST00000514234	713	740	0.2605	['chr1', 1626852, '+']	['chr1', 1626879, '+']
ENST00000514234	760	787	0.2858	['chr1', 1626899, '+']	['chr1', 1626926, '+']
ENST00000514234	891	972	0.37725	['chr1', 1627104, '+']	['chr1', 1627185, '+']
ENST00000514234	1219	1238	0.23565	['chr1', 1627748, '+']	['chr1', 1627767, '+']
ENST00000514234	1272	1308	0.28833	['chr1', 1627801, '+']	['chr1', 1628026, '+']
ENST00000514234	1333	1354	0.23765	['chr1', 1628051, '+']	['chr1', 1628072, '+']
ENST00000514234	1508	1527	0.23275	['chr1', 1628319, '+']	['chr1', 1628338, '+']
ENST00000514234	1568	1587	0.2318	['chr1', 1628379, '+']	['chr1', 1628398, '+']
ENST00000514234	1666	1689	0.27155	['chr1', 1628566, '+']	['chr1', 1628589, '+']
ENST00000514234	1699	1720	0.23785	['chr1', 1628599, '+']	['chr1', 1628620, '+']
ENST00000514234	1867	1892	0.24055	['chr1', 1629177, '+']	['chr1', 1629202, '+']
ENST00000514234	1901	1941	0.295	['chr1', 1629211, '+']	['chr1', 1629251, '+']
ENST00000514234	2001	2052	0.291	['chr1', 1629311, '+']	['chr1', 1629435, '+']
ENST00000514234	2285	2317	0.2579	['chr1', 1630327, '+']	['chr1', 1630359, '+']
ENST00000473511	289	308	0.23565	['chr1', 1627748, '+']	['chr1', 1627767, '+']
ENST00000473511	342	378	0.28833	['chr1', 1627801, '+']	['chr1', 1628026, '+']
ENST00000473511	403	424	0.23765	['chr1', 1628051, '+']	['chr1', 1628072, '+']
ENST00000473511	671	690	0.23275	['chr1', 1628319, '+']	['chr1', 1628338, '+']
ENST00000473511	731	750	0.2318	['chr1', 1628379, '+']	['chr1', 1628398, '+']
ENST00000473511	829	852	0.27155	['chr1', 1628566, '+']	['chr1', 1628589, '+']
ENST00000473511	862	883	0.23785	['chr1', 1628599, '+']	['chr1', 1628620, '+']
ENST00000473511	1030	1055	0.24055	['chr1', 1629177, '+']	['chr1', 1629202, '+']
ENST00000473511	1064	1104	0.295	['chr1', 1629211, '+']	['chr1', 1629251, '+']
ENST00000473511	1164	1215	0.291	['chr1', 1629311, '+']	['chr1', 1629435, '+']
ENST00000464570	227	246	0.23565	['chr1', 1627748, '+']	['chr1', 1627767, '+']
ENST00000464570	280	316	0.28833	['chr1', 1627801, '+']	['chr1', 1628026, '+']
ENST00000464570	341	362	0.23765	['chr1', 1628051, '+']	['chr1', 1628072, '+']
ENST00000464570	516	535	0.23275	['chr1', 1628319, '+']	['chr1', 1628338, '+']
ENST00000464570	576	595	0.2318	['chr1', 1628379, '+']	['chr1', 1628398, '+']
ENST00000464570	674	697	0.27155	['chr1', 1628566, '+']	['chr1', 1628589, '+']
ENST00000464570	707	728	0.23785	['chr1', 1628599, '+']	['chr1', 1628620, '+']
ENST00000464570	875	900	0.24055	['chr1', 1629177, '+']	['chr1', 1629202, '+']
ENST00000464570	909	946	0.30231	['chr1', 1629211, '+']	['chr1', 1629248, '+']
ENST00000483015	78	101	0.27155	['chr1', 1628566, '+']	['chr1', 1628589, '+']
ENST00000483015	111	132	0.23785	['chr1', 1628599, '+']	['chr1', 1628620, '+']
ENST00000483015	378	403	0.24055	['chr1', 1629177, '+']	['chr1', 1629202, '+']
ENST00000483015	412	452	0.295	['chr1', 1629211, '+']	['chr1', 1629251, '+']
ENST00000483015	512	563	0.291	['chr1', 1629311, '+']	['chr1', 1629435, '+']
ENST00000483015	796	828	0.2579	['chr1', 1630327, '+']	['chr1', 1630359, '+']
ENST00000511910	72	97	0.24055	['chr1', 1629177, '+']	['chr1', 1629202, '+']
ENST00000511910	106	146	0.295	['chr1', 1629211, '+']	['chr1', 1629251, '+']
ENST00000511910	308	340	0.2579	['chr1', 1630327, '+']	['chr1', 1630359, '+']
ENST00000470373	268	300	0.2579	['chr1', 1630327, '+']	['chr1', 1630359, '+']
ENST00000378567	873	900	0.26453	['chr1', 2150814, '+']	['chr1', 2150841, '+']
ENST00000378567	1438	1470	0.27515	['chr1', 2172380, '+']	['chr1', 2173920, '+']
ENST00000378567	1795	1818	0.2426	['chr1', 2184641, '+']	['chr1', 2184664, '+']
ENST00000378567	2004	2023	0.23385	['chr1', 2185073, '+']	['chr1', 2185092, '+']
ENST00000378567	2098	2117	0.23905	['chr1', 2185167, '+']	['chr1', 2185186, '+']
ENST00000400921	846	873	0.26453	['chr1', 2150814, '+']	['chr1', 2150841, '+']
ENST00000400921	1411	1443	0.27515	['chr1', 2172380, '+']	['chr1', 2173920, '+']
ENST00000400921	1768	1791	0.2426	['chr1', 2184641, '+']	['chr1', 2184664, '+']
ENST00000400921	1977	1996	0.23385	['chr1', 2185073, '+']	['chr1', 2185092, '+']
ENST00000400921	2071	2090	0.23905	['chr1', 2185167, '+']	['chr1', 2185186, '+']
ENST00000461106	668	695	0.26453	['chr1', 2150814, '+']	['chr1', 2150841, '+']
ENST00000461106	1233	1265	0.27515	['chr1', 2172380, '+']	['chr1', 2173920, '+']
ENST00000461106	1590	1613	0.2426	['chr1', 2184641, '+']	['chr1', 2184664, '+']
ENST00000461106	1799	1818	0.23385	['chr1', 2185073, '+']	['chr1', 2185092, '+']
ENST00000419838	296	326	0.2665	['chr1', 2150814, '+']	['chr1', 2150844, '+']
ENST00000479263	294	321	0.26453	['chr1', 2150814, '+']	['chr1', 2150841, '+']
ENST00000479263	859	891	0.27515	['chr1', 2172380, '+']	['chr1', 2173920, '+']
ENST00000479263	1216	1239	0.2426	['chr1', 2184641, '+']	['chr1', 2184664, '+']
ENST00000479263	1425	1444	0.23385	['chr1', 2185073, '+']	['chr1', 2185092, '+']
ENST00000479263	1519	1538	0.23905	['chr1', 2185167, '+']	['chr1', 2185186, '+']
ENST00000478770	285	312	0.26453	['chr1', 2150814, '+']	['chr1', 2150841, '+']
ENST00000478770	850	882	0.27515	['chr1', 2172380, '+']	['chr1', 2173920, '+']
ENST00000478770	1290	1313	0.2426	['chr1', 2184641, '+']	['chr1', 2184664, '+']
ENST00000478770	1498	1520	0.24764	['chr1', 2185072, '+']	['chr1', 2185094, '+']
ENST00000505322	973	1005	0.27515	['chr1', 2172380, '+']	['chr1', 2173920, '+']
ENST00000505322	1330	1353	0.2426	['chr1', 2184641, '+']	['chr1', 2184664, '+']
ENST00000505322	1539	1558	0.23385	['chr1', 2185073, '+']	['chr1', 2185092, '+']
ENST00000505322	1633	1652	0.23905	['chr1', 2185167, '+']	['chr1', 2185186, '+']
ENST00000378536	1165	1196	0.2394	['chr1', 2303101, '+']	['chr1', 2303313, '+']
ENST00000378536	2364	2415	0.2693	['chr1', 2306870, '+']	['chr1', 2306921, '+']
ENST00000378536	2433	2464	0.27055	['chr1', 2306939, '+']	['chr1', 2306970, '+']
ENST00000378536	2536	2561	0.24664	['chr1', 2307042, '+']	['chr1', 2307067, '+']
ENST00000378536	3962	3988	0.24875	['chr1', 2308468, '+']	['chr1', 2308494, '+']
ENST00000378536	5408	5436	0.25255	['chr1', 2309914, '+']	['chr1', 2309942, '+']
ENST00000378536	5552	5588	0.32655	['chr1', 2310058, '+']	['chr1', 2310094, '+']
ENST00000478223	200	231	0.2394	['chr1', 2303101, '+']	['chr1', 2303313, '+']
ENST00000378513	1476	1514	0.31993	['chr1', 2403918, '+']	['chr1', 2403956, '+']
ENST00000378513	1549	1570	0.25618	['chr1', 2403991, '+']	['chr1', 2404012, '+']
ENST00000378513	1572	1601	0.2701	['chr1', 2404014, '+']	['chr1', 2404043, '+']
ENST00000378513	1618	1655	0.27485	['chr1', 2404060, '+']	['chr1', 2404097, '+']
ENST00000378513	2020	2047	0.2623	['chr1', 2404462, '+']	['chr1', 2404489, '+']
ENST00000378513	2208	2227	0.23435	['chr1', 2404650, '+']	['chr1', 2404669, '+']
ENST00000378513	2397	2429	0.2926	['chr1', 2404839, '+']	['chr1', 2404871, '+']
ENST00000378513	2501	2533	0.2746	['chr1', 2404943, '+']	['chr1', 2404975, '+']
ENST00000378513	2653	2691	0.26554	['chr1', 2405095, '+']	['chr1', 2405133, '+']
ENST00000378513	2853	2876	0.25205	['chr1', 2405295, '+']	['chr1', 2405318, '+']
ENST00000605895	1518	1556	0.31993	['chr1', 2403918, '+']	['chr1', 2403956, '+']
ENST00000605895	1591	1612	0.25618	['chr1', 2403991, '+']	['chr1', 2404012, '+']
ENST00000605895	1614	1643	0.2701	['chr1', 2404014, '+']	['chr1', 2404043, '+']
ENST00000605895	1660	1697	0.27485	['chr1', 2404060, '+']	['chr1', 2404097, '+']
ENST00000605895	2062	2089	0.2623	['chr1', 2404462, '+']	['chr1', 2404489, '+']
ENST00000605895	2250	2269	0.23435	['chr1', 2404650, '+']	['chr1', 2404669, '+']
ENST00000605895	2439	2471	0.2926	['chr1', 2404839, '+']	['chr1', 2404871, '+']
ENST00000605895	2543	2575	0.2746	['chr1', 2404943, '+']	['chr1', 2404975, '+']
ENST00000605895	2695	2733	0.26554	['chr1', 2405095, '+']	['chr1', 2405133, '+']
ENST00000605895	2895	2918	0.25205	['chr1', 2405295, '+']	['chr1', 2405318, '+']
ENST00000378425	261	296	0.35131	['chr1', 2587152, '+']	['chr1', 2587187, '+']
ENST00000378425	355	393	0.28462	['chr1', 2587246, '+']	['chr1', 2587284, '+']
ENST00000378425	799	827	0.24645	['chr1', 2589601, '+']	['chr1', 2589629, '+']
ENST00000378425	870	891	0.26609	['chr1', 2589672, '+']	['chr1', 2589693, '+']
ENST00000378425	968	994	0.31182	['chr1', 2589770, '+']	['chr1', 2589796, '+']
ENST00000378425	1279	1301	0.23785	['chr1', 2590081, '+']	['chr1', 2590103, '+']
ENST00000378425	1319	1354	0.3152	['chr1', 2590121, '+']	['chr1', 2590156, '+']
ENST00000378425	1674	1709	0.27695	['chr1', 2590476, '+']	['chr1', 2590511, '+']
ENST00000378425	1724	1755	0.29405	['chr1', 2590526, '+']	['chr1', 2590557, '+']
ENST00000378425	1860	1896	0.27365	['chr1', 2590662, '+']	['chr1', 2590698, '+']
ENST00000378425	1918	1945	0.25639	['chr1', 2590720, '+']	['chr1', 2590747, '+']
ENST00000378425	2063	2088	0.26955	['chr1', 2590865, '+']	['chr1', 2590890, '+']
ENST00000378425	2155	2180	0.25473	['chr1', 2590957, '+']	['chr1', 2590982, '+']
ENST00000378425	2332	2351	0.2336	['chr1', 2591134, '+']	['chr1', 2591153, '+']
ENST00000378425	2402	2431	0.2435	['chr1', 2591204, '+']	['chr1', 2591233, '+']
ENST00000444521	261	296	0.35131	['chr1', 2587152, '+']	['chr1', 2587187, '+']
ENST00000444521	355	393	0.28462	['chr1', 2587246, '+']	['chr1', 2587284, '+']
ENST00000444521	961	989	0.24645	['chr1', 2589601, '+']	['chr1', 2589629, '+']
ENST00000444521	1032	1053	0.26609	['chr1', 2589672, '+']	['chr1', 2589693, '+']
ENST00000444521	1130	1156	0.31182	['chr1', 2589770, '+']	['chr1', 2589796, '+']
ENST00000444521	1441	1463	0.23785	['chr1', 2590081, '+']	['chr1', 2590103, '+']
ENST00000444521	1481	1516	0.3152	['chr1', 2590121, '+']	['chr1', 2590156, '+']
ENST00000444521	1836	1871	0.27695	['chr1', 2590476, '+']	['chr1', 2590511, '+']
ENST00000444521	1886	1917	0.29405	['chr1', 2590526, '+']	['chr1', 2590557, '+']
ENST00000444521	2022	2058	0.27365	['chr1', 2590662, '+']	['chr1', 2590698, '+']
ENST00000444521	2080	2107	0.25639	['chr1', 2590720, '+']	['chr1', 2590747, '+']
ENST00000444521	2225	2250	0.26955	['chr1', 2590865, '+']	['chr1', 2590890, '+']
ENST00000444521	2317	2342	0.25473	['chr1', 2590957, '+']	['chr1', 2590982, '+']
ENST00000444521	2494	2513	0.2336	['chr1', 2591134, '+']	['chr1', 2591153, '+']
ENST00000444521	2564	2593	0.2435	['chr1', 2591204, '+']	['chr1', 2591233, '+']
ENST00000419916	236	271	0.35131	['chr1', 2587152, '+']	['chr1', 2587187, '+']
ENST00000419916	330	368	0.28462	['chr1', 2587246, '+']	['chr1', 2587284, '+']
ENST00000419916	882	910	0.24645	['chr1', 2589601, '+']	['chr1', 2589629, '+']
ENST00000419916	953	974	0.26609	['chr1', 2589672, '+']	['chr1', 2589693, '+']
ENST00000419916	1051	1077	0.31182	['chr1', 2589770, '+']	['chr1', 2589796, '+']
ENST00000419916	1362	1384	0.23785	['chr1', 2590081, '+']	['chr1', 2590103, '+']
ENST00000419916	1402	1437	0.3152	['chr1', 2590121, '+']	['chr1', 2590156, '+']
ENST00000419916	1757	1792	0.27695	['chr1', 2590476, '+']	['chr1', 2590511, '+']
ENST00000419916	1807	1838	0.29405	['chr1', 2590526, '+']	['chr1', 2590557, '+']
ENST00000419916	1943	1979	0.27365	['chr1', 2590662, '+']	['chr1', 2590698, '+']
ENST00000419916	2001	2028	0.25639	['chr1', 2590720, '+']	['chr1', 2590747, '+']
ENST00000419916	2146	2171	0.26955	['chr1', 2590865, '+']	['chr1', 2590890, '+']
ENST00000419916	2238	2263	0.25473	['chr1', 2590957, '+']	['chr1', 2590982, '+']
ENST00000419916	2415	2434	0.2336	['chr1', 2591134, '+']	['chr1', 2591153, '+']
ENST00000419916	2485	2514	0.2435	['chr1', 2591204, '+']	['chr1', 2591233, '+']
ENST00000378424	231	266	0.35131	['chr1', 2587152, '+']	['chr1', 2587187, '+']
ENST00000378424	325	363	0.28462	['chr1', 2587246, '+']	['chr1', 2587284, '+']
ENST00000378424	899	927	0.24645	['chr1', 2589601, '+']	['chr1', 2589629, '+']
ENST00000378424	970	991	0.26609	['chr1', 2589672, '+']	['chr1', 2589693, '+']
ENST00000378424	1068	1094	0.31182	['chr1', 2589770, '+']	['chr1', 2589796, '+']
ENST00000378424	1379	1401	0.23785	['chr1', 2590081, '+']	['chr1', 2590103, '+']
ENST00000378424	1419	1454	0.3152	['chr1', 2590121, '+']	['chr1', 2590156, '+']
ENST00000378424	1774	1809	0.27695	['chr1', 2590476, '+']	['chr1', 2590511, '+']
ENST00000378424	1824	1855	0.29405	['chr1', 2590526, '+']	['chr1', 2590557, '+']
ENST00000378424	1960	1996	0.27365	['chr1', 2590662, '+']	['chr1', 2590698, '+']
ENST00000378424	2018	2045	0.25639	['chr1', 2590720, '+']	['chr1', 2590747, '+']
ENST00000378424	2163	2188	0.26955	['chr1', 2590865, '+']	['chr1', 2590890, '+']
ENST00000378424	2255	2280	0.25473	['chr1', 2590957, '+']	['chr1', 2590982, '+']
ENST00000378424	2432	2451	0.2336	['chr1', 2591134, '+']	['chr1', 2591153, '+']
ENST00000378424	2502	2531	0.2435	['chr1', 2591204, '+']	['chr1', 2591233, '+']
ENST00000378427	213	248	0.35131	['chr1', 2587152, '+']	['chr1', 2587187, '+']
ENST00000378427	307	345	0.28462	['chr1', 2587246, '+']	['chr1', 2587284, '+']
ENST00000378427	827	855	0.24645	['chr1', 2589601, '+']	['chr1', 2589629, '+']
ENST00000378427	898	919	0.26609	['chr1', 2589672, '+']	['chr1', 2589693, '+']
ENST00000378427	996	1022	0.31182	['chr1', 2589770, '+']	['chr1', 2589796, '+']
ENST00000378427	1307	1329	0.23785	['chr1', 2590081, '+']	['chr1', 2590103, '+']
ENST00000378427	1347	1382	0.3152	['chr1', 2590121, '+']	['chr1', 2590156, '+']
ENST00000378427	1702	1737	0.27695	['chr1', 2590476, '+']	['chr1', 2590511, '+']
ENST00000378427	1752	1783	0.29405	['chr1', 2590526, '+']	['chr1', 2590557, '+']
ENST00000378427	1888	1924	0.27365	['chr1', 2590662, '+']	['chr1', 2590698, '+']
ENST00000378427	1946	1973	0.25639	['chr1', 2590720, '+']	['chr1', 2590747, '+']
ENST00000378427	2091	2116	0.26955	['chr1', 2590865, '+']	['chr1', 2590890, '+']
ENST00000378427	2183	2208	0.25473	['chr1', 2590957, '+']	['chr1', 2590982, '+']
ENST00000378427	2360	2379	0.2336	['chr1', 2591134, '+']	['chr1', 2591153, '+']
ENST00000378427	2430	2459	0.2435	['chr1', 2591204, '+']	['chr1', 2591233, '+']
ENST00000484099	75	110	0.35131	['chr1', 2587152, '+']	['chr1', 2587187, '+']
ENST00000484099	169	207	0.28462	['chr1', 2587246, '+']	['chr1', 2587284, '+']
ENST00000484099	709	737	0.24645	['chr1', 2589601, '+']	['chr1', 2589629, '+']
ENST00000484099	780	801	0.26609	['chr1', 2589672, '+']	['chr1', 2589693, '+']
ENST00000484099	878	904	0.31182	['chr1', 2589770, '+']	['chr1', 2589796, '+']
ENST00000484099	1189	1211	0.23785	['chr1', 2590081, '+']	['chr1', 2590103, '+']
ENST00000484099	1229	1264	0.3152	['chr1', 2590121, '+']	['chr1', 2590156, '+']
ENST00000484099	1584	1619	0.27695	['chr1', 2590476, '+']	['chr1', 2590511, '+']
ENST00000484099	1634	1665	0.29405	['chr1', 2590526, '+']	['chr1', 2590557, '+']
ENST00000484099	1770	1806	0.27365	['chr1', 2590662, '+']	['chr1', 2590698, '+']
ENST00000484099	1828	1855	0.25639	['chr1', 2590720, '+']	['chr1', 2590747, '+']
ENST00000484099	1973	1998	0.26955	['chr1', 2590865, '+']	['chr1', 2590890, '+']
ENST00000484099	2065	2090	0.25473	['chr1', 2590957, '+']	['chr1', 2590982, '+']
ENST00000484099	2242	2261	0.2336	['chr1', 2591134, '+']	['chr1', 2591153, '+']
ENST00000484099	2312	2341	0.2435	['chr1', 2591204, '+']	['chr1', 2591233, '+']
ENST00000476686	639	667	0.24645	['chr1', 2589601, '+']	['chr1', 2589629, '+']
ENST00000476686	710	731	0.26609	['chr1', 2589672, '+']	['chr1', 2589693, '+']
ENST00000476686	808	834	0.31182	['chr1', 2589770, '+']	['chr1', 2589796, '+']
ENST00000476686	1119	1141	0.23785	['chr1', 2590081, '+']	['chr1', 2590103, '+']
ENST00000476686	1159	1194	0.3152	['chr1', 2590121, '+']	['chr1', 2590156, '+']
ENST00000476686	1514	1549	0.27695	['chr1', 2590476, '+']	['chr1', 2590511, '+']
ENST00000476686	1564	1595	0.29405	['chr1', 2590526, '+']	['chr1', 2590557, '+']
ENST00000476686	1700	1736	0.27365	['chr1', 2590662, '+']	['chr1', 2590698, '+']
ENST00000476686	1758	1785	0.25639	['chr1', 2590720, '+']	['chr1', 2590747, '+']
ENST00000476686	1903	1928	0.26955	['chr1', 2590865, '+']	['chr1', 2590890, '+']
ENST00000476686	1995	2020	0.25473	['chr1', 2590957, '+']	['chr1', 2590982, '+']
ENST00000476686	2172	2191	0.2336	['chr1', 2591134, '+']	['chr1', 2591153, '+']
ENST00000476686	2242	2271	0.2435	['chr1', 2591204, '+']	['chr1', 2591233, '+']
ENST00000490738	301	334	0.24385	['chr1', 6871816, '+']	['chr1', 6871849, '+']
ENST00000490738	381	410	0.26755	['chr1', 6871896, '+']	['chr1', 6871925, '+']
ENST00000476163	291	324	0.24385	['chr1', 6871816, '+']	['chr1', 6887662, '+']
ENST00000476163	603	630	0.28135	['chr1', 6887941, '+']	['chr1', 6887968, '+']
ENST00000476163	656	676	0.23627	['chr1', 6887994, '+']	['chr1', 6888014, '+']
ENST00000473578	345	378	0.24385	['chr1', 6871816, '+']	['chr1', 6871849, '+']
ENST00000473578	425	454	0.26755	['chr1', 6871896, '+']	['chr1', 6871925, '+']
ENST00000467404	343	376	0.24385	['chr1', 6871816, '+']	['chr1', 6871849, '+']
ENST00000467404	423	452	0.26755	['chr1', 6871896, '+']	['chr1', 6871925, '+']
ENST00000461311	273	306	0.24385	['chr1', 6871816, '+']	['chr1', 6887662, '+']
ENST00000482934	496	523	0.28135	['chr1', 6887941, '+']	['chr1', 6887968, '+']
ENST00000482934	549	569	0.23627	['chr1', 6887994, '+']	['chr1', 6888014, '+']
ENST00000472283	87	106	0.23955	['chr1', 6853181, '+']	['chr1', 6871767, '+']
ENST00000472283	155	188	0.24385	['chr1', 6871816, '+']	['chr1', 6871849, '+']
ENST00000472283	235	264	0.26755	['chr1', 6871896, '+']	['chr1', 6871925, '+']
ENST00000054666	184	234	0.34845	['chr1', 7773508, '+']	['chr1', 7777206, '+']
ENST00000054666	251	271	0.24492	['chr1', 7777223, '+']	['chr1', 7777243, '+']
ENST00000054666	283	303	0.25118	['chr1', 7777255, '+']	['chr1', 7777275, '+']
ENST00000054666	306	349	0.37714	['chr1', 7777278, '+']	['chr1', 7778120, '+']
ENST00000054666	830	861	0.2423	['chr1', 7780057, '+']	['chr1', 7780088, '+']
ENST00000054666	867	889	0.2446	['chr1', 7780094, '+']	['chr1', 7780116, '+']
ENST00000054666	1052	1084	0.27009	['chr1', 7780279, '+']	['chr1', 7780311, '+']
ENST00000054666	1345	1372	0.25595	['chr1', 7780572, '+']	['chr1', 7780599, '+']
ENST00000054666	1414	1433	0.24635	['chr1', 7780641, '+']	['chr1', 7780660, '+']
ENST00000054666	1493	1517	0.2518	['chr1', 7780720, '+']	['chr1', 7780744, '+']
ENST00000487194	60	110	0.34845	['chr1', 7777156, '+']	['chr1', 7777206, '+']
ENST00000487194	127	147	0.24492	['chr1', 7777223, '+']	['chr1', 7777243, '+']
ENST00000487194	159	179	0.25118	['chr1', 7777255, '+']	['chr1', 7777275, '+']
ENST00000487194	182	225	0.37714	['chr1', 7777278, '+']	['chr1', 7778120, '+']
ENST00000460192	27	55	0.29545	['chr1', 7961689, '+']	['chr1', 7961717, '+']
ENST00000338639	27	55	0.29545	['chr1', 7961689, '+']	['chr1', 7961717, '+']
ENST00000338639	61	87	0.25547	['chr1', 7961723, '+']	['chr1', 7961749, '+']
ENST00000493678	1	26	0.25631	['chr1', 7961692, '+']	['chr1', 7961717, '+']
ENST00000340305	1301	1323	0.26467	['chr1', 9602404, '+']	['chr1', 9602426, '+']
ENST00000340305	2146	2168	0.2387	['chr1', 9603249, '+']	['chr1', 9603271, '+']
ENST00000340305	2279	2335	0.25955	['chr1', 9603382, '+']	['chr1', 9603438, '+']
ENST00000340305	2764	2788	0.23955	['chr1', 9603867, '+']	['chr1', 9603891, '+']
ENST00000340305	3070	3102	0.2632	['chr1', 9604173, '+']	['chr1', 9604205, '+']
ENST00000340305	3360	3380	0.23345	['chr1', 9604463, '+']	['chr1', 9604483, '+']
ENST00000340305	3724	3751	0.24025	['chr1', 9604827, '+']	['chr1', 9604854, '+']
ENST00000340305	3790	3809	0.23375	['chr1', 9604893, '+']	['chr1', 9604912, '+']
ENST00000340381	1274	1308	0.28045	['chr1', 9607661, '+']	['chr1', 9607695, '+']
ENST00000340381	1581	1607	0.25375	['chr1', 9610612, '+']	['chr1', 9610638, '+']
ENST00000340381	1672	1702	0.26865	['chr1', 9610703, '+']	['chr1', 9610733, '+']
ENST00000340381	1723	1749	0.23965	['chr1', 9610754, '+']	['chr1', 9610780, '+']
ENST00000340381	3113	3138	0.2374	['chr1', 9614186, '+']	['chr1', 9614211, '+']
ENST00000340381	3160	3183	0.24185	['chr1', 9614233, '+']	['chr1', 9614256, '+']
ENST00000340381	3719	3751	0.29956	['chr1', 9614792, '+']	['chr1', 9614824, '+']
ENST00000416541	993	1027	0.28045	['chr1', 9607661, '+']	['chr1', 9607695, '+']
ENST00000416541	1228	1254	0.25375	['chr1', 9610612, '+']	['chr1', 9610638, '+']
ENST00000416541	1319	1349	0.26865	['chr1', 9610703, '+']	['chr1', 9610733, '+']
ENST00000416541	1370	1396	0.23965	['chr1', 9610754, '+']	['chr1', 9610780, '+']
ENST00000416541	2760	2785	0.2374	['chr1', 9614186, '+']	['chr1', 9614211, '+']
ENST00000416541	2807	2830	0.24185	['chr1', 9614233, '+']	['chr1', 9614256, '+']
ENST00000416541	3366	3397	0.29956	['chr1', 9614792, '+']	['chr1', 9614823, '+']
ENST00000508400	241	267	0.25375	['chr1', 9610612, '+']	['chr1', 9610638, '+']
ENST00000508400	332	362	0.26865	['chr1', 9610703, '+']	['chr1', 9610733, '+']
ENST00000508400	383	409	0.23965	['chr1', 9610754, '+']	['chr1', 9610780, '+']
ENST00000508400	853	872	0.23127	['chr1', 9613207, '+']	['chr1', 9613226, '+']
ENST00000253251	436	486	0.2713	['chr1', 10033267, '+']	['chr1', 10033317, '+']
ENST00000253251	491	519	0.26105	['chr1', 10033322, '+']	['chr1', 10033350, '+']
ENST00000253251	520	548	0.25765	['chr1', 10033351, '+']	['chr1', 10033379, '+']
ENST00000253251	694	723	0.24511	['chr1', 10033525, '+']	['chr1', 10033554, '+']
ENST00000253251	745	764	0.2308	['chr1', 10033576, '+']	['chr1', 10033595, '+']
ENST00000253251	957	987	0.27435	['chr1', 10072121, '+']	['chr1', 10072151, '+']
ENST00000253251	1042	1067	0.29883	['chr1', 10072206, '+']	['chr1', 10095477, '+']
ENST00000253251	1069	1090	0.23725	['chr1', 10095479, '+']	['chr1', 10095500, '+']
ENST00000253251	1442	1536	0.3411	['chr1', 10105538, '+']	['chr1', 10105632, '+']
ENST00000253251	1540	1562	0.24915	['chr1', 10105636, '+']	['chr1', 10105658, '+']
ENST00000253251	1681	1717	0.38518	['chr1', 10117491, '+']	['chr1', 10117527, '+']
ENST00000253251	2511	2547	0.41275	['chr1', 10135021, '+']	['chr1', 10135057, '+']
ENST00000253251	2549	2573	0.34273	['chr1', 10135059, '+']	['chr1', 10135083, '+']
ENST00000253251	2668	2702	0.33145	['chr1', 10135178, '+']	['chr1', 10137092, '+']
ENST00000253251	2708	2789	0.3186	['chr1', 10137098, '+']	['chr1', 10137179, '+']
ENST00000253251	2912	2937	0.33482	['chr1', 10145036, '+']	['chr1', 10146984, '+']
ENST00000253251	2952	3011	0.3014	['chr1', 10146999, '+']	['chr1', 10147058, '+']
ENST00000253251	3027	3046	0.23508	['chr1', 10147074, '+']	['chr1', 10149186, '+']
ENST00000253251	3176	3241	0.2802	['chr1', 10151359, '+']	['chr1', 10151424, '+']
ENST00000253251	3310	3334	0.293	['chr1', 10151493, '+']	['chr1', 10151517, '+']
ENST00000253251	3374	3393	0.2332	['chr1', 10151557, '+']	['chr1', 10158370, '+']
ENST00000253251	3464	3487	0.26655	['chr1', 10158441, '+']	['chr1', 10158464, '+']
ENST00000253251	3596	3626	0.2714	['chr1', 10161232, '+']	['chr1', 10161262, '+']
ENST00000253251	3853	3880	0.26153	['chr1', 10171205, '+']	['chr1', 10171232, '+']
ENST00000253251	4037	4074	0.2885	['chr1', 10178703, '+']	['chr1', 10178740, '+']
ENST00000253251	4147	4167	0.2386	['chr1', 10178813, '+']	['chr1', 10179430, '+']
ENST00000253251	4193	4219	0.2541	['chr1', 10179456, '+']	['chr1', 10179482, '+']
ENST00000253251	4269	4295	0.2467	['chr1', 10179532, '+']	['chr1', 10179558, '+']
ENST00000253251	4324	4346	0.25075	['chr1', 10179919, '+']	['chr1', 10179941, '+']
ENST00000253251	4597	4622	0.2513	['chr1', 10180192, '+']	['chr1', 10180217, '+']
ENST00000253251	4648	4667	0.2335	['chr1', 10180243, '+']	['chr1', 10180262, '+']
ENST00000253251	4721	4751	0.24473	['chr1', 10180316, '+']	['chr1', 10180346, '+']
ENST00000343090	193	223	0.27435	['chr1', 10072121, '+']	['chr1', 10072151, '+']
ENST00000343090	278	303	0.29883	['chr1', 10072206, '+']	['chr1', 10095477, '+']
ENST00000343090	305	326	0.23725	['chr1', 10095479, '+']	['chr1', 10095500, '+']
ENST00000343090	678	772	0.3411	['chr1', 10105538, '+']	['chr1', 10105632, '+']
ENST00000343090	776	798	0.24915	['chr1', 10105636, '+']	['chr1', 10105658, '+']
ENST00000343090	1304	1340	0.38518	['chr1', 10117491, '+']	['chr1', 10117527, '+']
ENST00000343090	2134	2170	0.41275	['chr1', 10135021, '+']	['chr1', 10135057, '+']
ENST00000343090	2172	2196	0.34273	['chr1', 10135059, '+']	['chr1', 10135083, '+']
ENST00000343090	2291	2325	0.33145	['chr1', 10135178, '+']	['chr1', 10137092, '+']
ENST00000343090	2331	2412	0.3186	['chr1', 10137098, '+']	['chr1', 10137179, '+']
ENST00000343090	2535	2560	0.33482	['chr1', 10145036, '+']	['chr1', 10146984, '+']
ENST00000343090	2575	2634	0.3014	['chr1', 10146999, '+']	['chr1', 10147058, '+']
ENST00000343090	2650	2669	0.23508	['chr1', 10147074, '+']	['chr1', 10149186, '+']
ENST00000343090	2799	2864	0.2802	['chr1', 10151359, '+']	['chr1', 10151424, '+']
ENST00000343090	2933	2957	0.293	['chr1', 10151493, '+']	['chr1', 10151517, '+']
ENST00000343090	2997	3016	0.2332	['chr1', 10151557, '+']	['chr1', 10158370, '+']
ENST00000343090	3087	3110	0.26655	['chr1', 10158441, '+']	['chr1', 10158464, '+']
ENST00000343090	3219	3249	0.2714	['chr1', 10161232, '+']	['chr1', 10161262, '+']
ENST00000343090	3476	3503	0.26153	['chr1', 10171205, '+']	['chr1', 10171232, '+']
ENST00000343090	3660	3697	0.2885	['chr1', 10178703, '+']	['chr1', 10178740, '+']
ENST00000343090	3770	3790	0.2386	['chr1', 10178813, '+']	['chr1', 10179430, '+']
ENST00000343090	3816	3842	0.2541	['chr1', 10179456, '+']	['chr1', 10179482, '+']
ENST00000343090	3892	3918	0.2467	['chr1', 10179532, '+']	['chr1', 10179558, '+']
ENST00000343090	3947	3969	0.25075	['chr1', 10179919, '+']	['chr1', 10179941, '+']
ENST00000343090	4220	4245	0.2513	['chr1', 10180192, '+']	['chr1', 10180217, '+']
ENST00000343090	4271	4290	0.2335	['chr1', 10180243, '+']	['chr1', 10180262, '+']
ENST00000343090	4344	4399	0.25685	['chr1', 10180316, '+']	['chr1', 10180371, '+']
ENST00000343090	4476	4517	0.2862	['chr1', 10180448, '+']	['chr1', 10180489, '+']
ENST00000343090	4902	4952	0.38564	['chr1', 10180874, '+']	['chr1', 10180924, '+']
ENST00000343090	4960	4992	0.275	['chr1', 10180932, '+']	['chr1', 10180964, '+']
ENST00000343090	5157	5199	0.31785	['chr1', 10181129, '+']	['chr1', 10181171, '+']
ENST00000343090	5220	5239	0.24038	['chr1', 10181192, '+']	['chr1', 10181211, '+']
ENST00000488228	88	111	0.26655	['chr1', 10158441, '+']	['chr1', 10158464, '+']
ENST00000488228	220	250	0.2714	['chr1', 10161232, '+']	['chr1', 10161262, '+']
ENST00000487244	250	277	0.26153	['chr1', 10171205, '+']	['chr1', 10171232, '+']
ENST00000487244	434	471	0.2885	['chr1', 10178703, '+']	['chr1', 10178740, '+']
ENST00000487244	544	564	0.2386	['chr1', 10178813, '+']	['chr1', 10179430, '+']
ENST00000487244	590	616	0.2541	['chr1', 10179456, '+']	['chr1', 10179482, '+']
ENST00000487244	666	692	0.2467	['chr1', 10179532, '+']	['chr1', 10179558, '+']
ENST00000487244	721	743	0.25075	['chr1', 10179919, '+']	['chr1', 10179941, '+']
ENST00000465408	147	167	0.2386	['chr1', 10179162, '+']	['chr1', 10179430, '+']
ENST00000465408	193	219	0.2541	['chr1', 10179456, '+']	['chr1', 10179482, '+']
ENST00000465408	269	295	0.2467	['chr1', 10179532, '+']	['chr1', 10179558, '+']
ENST00000491493	386	407	0.2397	['chr1', 10400542, '+']	['chr1', 10400563, '+']
ENST00000477958	296	317	0.2397	['chr1', 10400542, '+']	['chr1', 10400563, '+']
ENST00000270776	272	293	0.2397	['chr1', 10400542, '+']	['chr1', 10400563, '+']
ENST00000465632	357	378	0.2397	['chr1', 10400542, '+']	['chr1', 10400563, '+']
ENST00000460189	223	244	0.2397	['chr1', 10400542, '+']	['chr1', 10400563, '+']
ENST00000356607	1012	1119	0.3016	['chr1', 10629785, '+']	['chr1', 10629892, '+']
ENST00000356607	1364	1391	0.26155	['chr1', 10630137, '+']	['chr1', 10630164, '+']
ENST00000473118	160	241	0.2575	['chr1', 11013790, '+']	['chr1', 11013871, '+']
ENST00000473118	354	405	0.3367	['chr1', 11016862, '+']	['chr1', 11016913, '+']
ENST00000639083	132	213	0.2575	['chr1', 11013790, '+']	['chr1', 11013871, '+']
ENST00000639083	326	377	0.3367	['chr1', 11016862, '+']	['chr1', 11016913, '+']
ENST00000639083	631	681	0.3554	['chr1', 11020447, '+']	['chr1', 11020497, '+']
ENST00000639083	792	849	0.2857	['chr1', 11022132, '+']	['chr1', 11022189, '+']
ENST00000639083	856	876	0.2457	['chr1', 11022196, '+']	['chr1', 11022216, '+']
ENST00000639083	990	1021	0.2461	['chr1', 11022330, '+']	['chr1', 11022361, '+']
ENST00000639083	1628	1695	0.3472	['chr1', 11022968, '+']	['chr1', 11023035, '+']
ENST00000639083	1906	1930	0.2458	['chr1', 11023246, '+']	['chr1', 11023270, '+']
ENST00000639599	257	338	0.2575	['chr1', 11013790, '+']	['chr1', 11013871, '+']
ENST00000639599	451	502	0.3367	['chr1', 11016862, '+']	['chr1', 11016913, '+']
ENST00000639599	756	806	0.3554	['chr1', 11020447, '+']	['chr1', 11020497, '+']
ENST00000639599	917	974	0.2857	['chr1', 11022132, '+']	['chr1', 11022189, '+']
ENST00000639599	981	1001	0.2457	['chr1', 11022196, '+']	['chr1', 11022216, '+']
ENST00000639599	1080	1104	0.2458	['chr1', 11023246, '+']	['chr1', 11023270, '+']
ENST00000629725	197	278	0.2575	['chr1', 11013790, '+']	['chr1', 11013871, '+']
ENST00000629725	391	442	0.3367	['chr1', 11016862, '+']	['chr1', 11016913, '+']
ENST00000629725	696	746	0.3554	['chr1', 11020447, '+']	['chr1', 11020497, '+']
ENST00000629725	857	914	0.2857	['chr1', 11022132, '+']	['chr1', 11022189, '+']
ENST00000629725	921	941	0.2457	['chr1', 11022196, '+']	['chr1', 11022216, '+']
ENST00000439080	166	247	0.2575	['chr1', 11013790, '+']	['chr1', 11013871, '+']
ENST00000439080	501	551	0.3554	['chr1', 11020447, '+']	['chr1', 11020497, '+']
ENST00000439080	662	719	0.2857	['chr1', 11022132, '+']	['chr1', 11022189, '+']
ENST00000439080	726	746	0.2457	['chr1', 11022196, '+']	['chr1', 11022216, '+']
ENST00000439080	860	891	0.2461	['chr1', 11022330, '+']	['chr1', 11022361, '+']
ENST00000613864	165	246	0.2575	['chr1', 11013790, '+']	['chr1', 11013871, '+']
ENST00000613864	359	410	0.3367	['chr1', 11016862, '+']	['chr1', 11016913, '+']
ENST00000476201	165	246	0.2575	['chr1', 11013790, '+']	['chr1', 11013871, '+']
ENST00000476201	482	533	0.3367	['chr1', 11016862, '+']	['chr1', 11016913, '+']
ENST00000476201	787	837	0.3554	['chr1', 11020447, '+']	['chr1', 11020497, '+']
ENST00000472476	165	246	0.2575	['chr1', 11013790, '+']	['chr1', 11013871, '+']
ENST00000472476	491	542	0.3367	['chr1', 11016862, '+']	['chr1', 11016913, '+']
ENST00000472476	796	846	0.3554	['chr1', 11020447, '+']	['chr1', 11020497, '+']
ENST00000621715	149	230	0.2575	['chr1', 11013790, '+']	['chr1', 11013871, '+']
ENST00000621715	343	394	0.3367	['chr1', 11016862, '+']	['chr1', 11016913, '+']
ENST00000621715	638	695	0.2857	['chr1', 11022132, '+']	['chr1', 11022189, '+']
ENST00000621715	702	722	0.2457	['chr1', 11022196, '+']	['chr1', 11022216, '+']
ENST00000315091	75	156	0.2575	['chr1', 11013790, '+']	['chr1', 11013871, '+']
ENST00000315091	269	320	0.3367	['chr1', 11016862, '+']	['chr1', 11016913, '+']
ENST00000315091	574	624	0.3554	['chr1', 11020447, '+']	['chr1', 11020497, '+']
ENST00000315091	735	792	0.2857	['chr1', 11022132, '+']	['chr1', 11022189, '+']
ENST00000315091	799	819	0.2457	['chr1', 11022196, '+']	['chr1', 11022216, '+']
ENST00000315091	898	922	0.2458	['chr1', 11023246, '+']	['chr1', 11023270, '+']
ENST00000638264	63	144	0.2575	['chr1', 11013790, '+']	['chr1', 11013871, '+']
ENST00000638264	366	423	0.2857	['chr1', 11022132, '+']	['chr1', 11022189, '+']
ENST00000638264	430	450	0.2457	['chr1', 11022196, '+']	['chr1', 11022216, '+']
ENST00000616545	63	144	0.2575	['chr1', 11013790, '+']	['chr1', 11013871, '+']
ENST00000616545	257	308	0.3367	['chr1', 11016862, '+']	['chr1', 11016913, '+']
ENST00000616545	562	612	0.3554	['chr1', 11020447, '+']	['chr1', 11020497, '+']
ENST00000616545	723	780	0.2857	['chr1', 11022132, '+']	['chr1', 11022189, '+']
ENST00000616545	787	807	0.2457	['chr1', 11022196, '+']	['chr1', 11022216, '+']
ENST00000616545	833	855	0.26355	['chr1', 11022242, '+']	['chr1', 11023276, '+']
ENST00000621790	63	144	0.2575	['chr1', 11013790, '+']	['chr1', 11013871, '+']
ENST00000621790	257	308	0.3367	['chr1', 11016862, '+']	['chr1', 11016913, '+']
ENST00000621790	562	612	0.3554	['chr1', 11020447, '+']	['chr1', 11020497, '+']
ENST00000621790	723	780	0.2857	['chr1', 11022132, '+']	['chr1', 11022189, '+']
ENST00000621790	787	807	0.2457	['chr1', 11022196, '+']	['chr1', 11022216, '+']
ENST00000621790	913	937	0.2458	['chr1', 11023246, '+']	['chr1', 11023270, '+']
ENST00000622057	4	55	0.3367	['chr1', 11016862, '+']	['chr1', 11016913, '+']
ENST00000622057	309	359	0.3554	['chr1', 11020447, '+']	['chr1', 11020497, '+']
ENST00000622057	470	527	0.2857	['chr1', 11022132, '+']	['chr1', 11022189, '+']
ENST00000622057	534	554	0.2457	['chr1', 11022196, '+']	['chr1', 11022216, '+']
ENST00000622057	661	685	0.296	['chr1', 11023242, '+']	['chr1', 11023266, '+']
ENST00000617172	1	49	0.3367	['chr1', 11016865, '+']	['chr1', 11016913, '+']
ENST00000617172	303	353	0.3554	['chr1', 11020447, '+']	['chr1', 11020497, '+']
ENST00000617172	464	521	0.2857	['chr1', 11022132, '+']	['chr1', 11022189, '+']
ENST00000617172	528	548	0.2457	['chr1', 11022196, '+']	['chr1', 11022216, '+']
ENST00000617172	636	660	0.2458	['chr1', 11023246, '+']	['chr1', 11023270, '+']
ENST00000611963	202	252	0.3554	['chr1', 11020447, '+']	['chr1', 11020497, '+']
ENST00000611963	363	420	0.2857	['chr1', 11022132, '+']	['chr1', 11022189, '+']
ENST00000611963	427	447	0.2457	['chr1', 11022196, '+']	['chr1', 11022216, '+']
ENST00000611963	526	550	0.2458	['chr1', 11023246, '+']	['chr1', 11023270, '+']
ENST00000620632	113	163	0.3554	['chr1', 11020447, '+']	['chr1', 11020497, '+']
ENST00000620632	274	331	0.2857	['chr1', 11022132, '+']	['chr1', 11022189, '+']
ENST00000620632	338	358	0.2457	['chr1', 11022196, '+']	['chr1', 11022216, '+']
ENST00000620632	446	470	0.2458	['chr1', 11023246, '+']	['chr1', 11023270, '+']
ENST00000619555	113	163	0.3554	['chr1', 11020447, '+']	['chr1', 11020497, '+']
ENST00000619555	274	331	0.2857	['chr1', 11022132, '+']	['chr1', 11022189, '+']
ENST00000619555	338	358	0.2457	['chr1', 11022196, '+']	['chr1', 11022216, '+']
ENST00000619555	478	502	0.2458	['chr1', 11023246, '+']	['chr1', 11023270, '+']
ENST00000614494	15	65	0.3554	['chr1', 11020447, '+']	['chr1', 11020497, '+']
ENST00000614494	176	230	0.28918	['chr1', 11022132, '+']	['chr1', 11023164, '+']
ENST00000614494	312	336	0.2458	['chr1', 11023246, '+']	['chr1', 11023270, '+']
ENST00000477447	22	79	0.2857	['chr1', 11022132, '+']	['chr1', 11022189, '+']
ENST00000477447	86	106	0.2457	['chr1', 11022196, '+']	['chr1', 11022216, '+']
ENST00000477447	194	218	0.2458	['chr1', 11023246, '+']	['chr1', 11023270, '+']
ENST00000376637	950	977	0.2736	['chr1', 11750593, '+']	['chr1', 11750620, '+']
ENST00000376629	922	949	0.2736	['chr1', 11750593, '+']	['chr1', 11750620, '+']
ENST00000314340	935	962	0.2736	['chr1', 11750593, '+']	['chr1', 11750620, '+']
ENST00000444836	490	512	0.25565	['chr1', 11992561, '+']	['chr1', 11992583, '+']
ENST00000444836	700	724	0.2459	['chr1', 11996236, '+']	['chr1', 11996260, '+']
ENST00000444836	808	828	0.2361	['chr1', 11997322, '+']	['chr1', 11997342, '+']
ENST00000444836	941	1022	0.2961	['chr1', 11998803, '+']	['chr1', 11998993, '+']
ENST00000444836	1028	1051	0.24145	['chr1', 11998999, '+']	['chr1', 11999022, '+']
ENST00000444836	1099	1124	0.26519	['chr1', 11999070, '+']	['chr1', 11999095, '+']
ENST00000444836	1187	1215	0.2492	['chr1', 12001463, '+']	['chr1', 12001491, '+']
ENST00000444836	1341	1397	0.33155	['chr1', 12001831, '+']	['chr1', 12002032, '+']
ENST00000444836	1417	1454	0.2628	['chr1', 12002052, '+']	['chr1', 12002089, '+']
ENST00000444836	1603	1622	0.23125	['chr1', 12004516, '+']	['chr1', 12004535, '+']
ENST00000444836	1734	1755	0.23646	['chr1', 12004858, '+']	['chr1', 12004879, '+']
ENST00000444836	2060	2124	0.30465	['chr1', 12006573, '+']	['chr1', 12006637, '+']
ENST00000444836	2384	2423	0.30525	['chr1', 12009598, '+']	['chr1', 12009637, '+']
ENST00000444836	3052	3077	0.2447	['chr1', 12012035, '+']	['chr1', 12012060, '+']
ENST00000444836	3323	3342	0.23295	['chr1', 12012306, '+']	['chr1', 12012325, '+']
ENST00000444836	3365	3393	0.28625	['chr1', 12012348, '+']	['chr1', 12012376, '+']
ENST00000444836	4214	4238	0.2376	['chr1', 12013197, '+']	['chr1', 12013221, '+']
ENST00000444836	4447	4497	0.26585	['chr1', 12013430, '+']	['chr1', 12013480, '+']
ENST00000490079	244	280	0.23875	['chr1', 11981983, '+']	['chr1', 11982019, '+']
ENST00000490079	281	312	0.2733	['chr1', 11982020, '+']	['chr1', 11982051, '+']
ENST00000490079	337	375	0.281	['chr1', 11982076, '+']	['chr1', 11982114, '+']
ENST00000235329	187	223	0.23875	['chr1', 11981983, '+']	['chr1', 11982019, '+']
ENST00000235329	224	255	0.2733	['chr1', 11982020, '+']	['chr1', 11982051, '+']
ENST00000235329	280	318	0.281	['chr1', 11982076, '+']	['chr1', 11982114, '+']
ENST00000235329	504	526	0.25565	['chr1', 11992561, '+']	['chr1', 11992583, '+']
ENST00000235329	714	738	0.2459	['chr1', 11996236, '+']	['chr1', 11996260, '+']
ENST00000235329	822	842	0.2361	['chr1', 11997322, '+']	['chr1', 11997342, '+']
ENST00000235329	955	1036	0.2961	['chr1', 11998803, '+']	['chr1', 11998993, '+']
ENST00000235329	1042	1065	0.24145	['chr1', 11998999, '+']	['chr1', 11999022, '+']
ENST00000235329	1113	1138	0.26519	['chr1', 11999070, '+']	['chr1', 11999095, '+']
ENST00000235329	1201	1229	0.2492	['chr1', 12001463, '+']	['chr1', 12001491, '+']
ENST00000235329	1355	1411	0.33155	['chr1', 12001831, '+']	['chr1', 12002032, '+']
ENST00000235329	1431	1468	0.2628	['chr1', 12002052, '+']	['chr1', 12002089, '+']
ENST00000235329	1617	1636	0.23125	['chr1', 12004516, '+']	['chr1', 12004535, '+']
ENST00000235329	1748	1769	0.23646	['chr1', 12004858, '+']	['chr1', 12004879, '+']
ENST00000235329	2074	2138	0.30465	['chr1', 12006573, '+']	['chr1', 12006637, '+']
ENST00000235329	2398	2437	0.30525	['chr1', 12009598, '+']	['chr1', 12009637, '+']
ENST00000235329	3066	3091	0.2447	['chr1', 12012035, '+']	['chr1', 12012060, '+']
ENST00000235329	3337	3356	0.23295	['chr1', 12012306, '+']	['chr1', 12012325, '+']
ENST00000235329	3379	3407	0.28625	['chr1', 12012348, '+']	['chr1', 12012376, '+']
ENST00000235329	4228	4252	0.2376	['chr1', 12013197, '+']	['chr1', 12013221, '+']
ENST00000235329	4461	4518	0.27353	['chr1', 12013430, '+']	['chr1', 12013487, '+']
ENST00000497302	64	100	0.23875	['chr1', 11981983, '+']	['chr1', 11982019, '+']
ENST00000497302	101	132	0.2733	['chr1', 11982020, '+']	['chr1', 11982051, '+']
ENST00000497302	157	195	0.281	['chr1', 11982076, '+']	['chr1', 11982114, '+']
ENST00000497302	566	588	0.25565	['chr1', 11992561, '+']	['chr1', 11992583, '+']
ENST00000412236	1	28	0.2418	['chr1', 11981992, '+']	['chr1', 11982019, '+']
ENST00000412236	29	60	0.2733	['chr1', 11982020, '+']	['chr1', 11982051, '+']
ENST00000412236	85	127	0.281	['chr1', 11982076, '+']	['chr1', 11982526, '+']
ENST00000412236	377	399	0.25565	['chr1', 11992561, '+']	['chr1', 11992583, '+']
ENST00000412236	445	468	0.25645	['chr1', 11992629, '+']	['chr1', 11992652, '+']
ENST00000478749	222	243	0.23575	['chr1', 12022229, '+']	['chr1', 12022250, '+']
ENST00000235332	235	267	0.25945	['chr1', 12021792, '+']	['chr1', 12021824, '+']
ENST00000235332	418	439	0.23575	['chr1', 12022229, '+']	['chr1', 12022250, '+']
ENST00000235332	1516	1552	0.40018	['chr1', 12031988, '+']	['chr1', 12032024, '+']
ENST00000466860	8	29	0.23575	['chr1', 12022229, '+']	['chr1', 12022250, '+']
ENST00000498685	1337	1371	0.38027	['chr1', 12031988, '+']	['chr1', 12032022, '+']
ENST00000478299	544	574	0.338	['chr1', 12031988, '+']	['chr1', 12032018, '+']
ENST00000375980	416	451	0.27313	['chr1', 15425901, '+']	['chr1', 15425936, '+']
ENST00000445566	46	81	0.27313	['chr1', 15425901, '+']	['chr1', 15425936, '+']
ENST00000375799	1171	1196	0.2446	['chr1', 15727016, '+']	['chr1', 15727041, '+']
ENST00000375793	1053	1078	0.2446	['chr1', 15727016, '+']	['chr1', 15727041, '+']
ENST00000487496	281	350	0.30164	['chr1', 15938863, '+']	['chr1', 15939351, '+']
ENST00000401088	1127	1146	0.23833	['chr1', 16395633, '+']	['chr1', 16395652, '+']
ENST00000401089	935	954	0.23833	['chr1', 16395633, '+']	['chr1', 16395652, '+']
ENST00000492354	892	911	0.23833	['chr1', 16395633, '+']	['chr1', 16395652, '+']
ENST00000337132	323	377	0.30818	['chr1', 16447909, '+']	['chr1', 16447963, '+']
ENST00000337132	578	611	0.25957	['chr1', 16449200, '+']	['chr1', 16451869, '+']
ENST00000337132	619	638	0.23625	['chr1', 16451877, '+']	['chr1', 16451896, '+']
ENST00000337132	1042	1124	0.26805	['chr1', 16459050, '+']	['chr1', 16459132, '+']
ENST00000337132	1147	1166	0.2339	['chr1', 16459155, '+']	['chr1', 16459174, '+']
ENST00000337132	1173	1255	0.2929	['chr1', 16459181, '+']	['chr1', 16459263, '+']
ENST00000337132	1258	1280	0.243	['chr1', 16459266, '+']	['chr1', 16459288, '+']
ENST00000337132	1381	1400	0.24091	['chr1', 16459389, '+']	['chr1', 16459408, '+']
ENST00000337132	1603	1652	0.297	['chr1', 16459611, '+']	['chr1', 16459660, '+']
ENST00000337132	1816	1836	0.258	['chr1', 16459824, '+']	['chr1', 16459844, '+']
ENST00000337132	1937	1987	0.2773	['chr1', 16459945, '+']	['chr1', 16459995, '+']
ENST00000504551	173	227	0.30818	['chr1', 16447909, '+']	['chr1', 16447963, '+']
ENST00000504551	346	379	0.25957	['chr1', 16449200, '+']	['chr1', 16451869, '+']
ENST00000504551	387	406	0.23625	['chr1', 16451877, '+']	['chr1', 16451896, '+']
ENST00000457722	193	247	0.30818	['chr1', 16447909, '+']	['chr1', 16447963, '+']
ENST00000457722	448	481	0.25957	['chr1', 16449200, '+']	['chr1', 16451869, '+']
ENST00000457722	489	508	0.23625	['chr1', 16451877, '+']	['chr1', 16451896, '+']
ENST00000443980	259	313	0.30818	['chr1', 16447909, '+']	['chr1', 16447963, '+']
ENST00000443980	514	547	0.25957	['chr1', 16449200, '+']	['chr1', 16451869, '+']
ENST00000443980	555	574	0.23625	['chr1', 16451877, '+']	['chr1', 16451896, '+']
ENST00000443980	902	984	0.26805	['chr1', 16459050, '+']	['chr1', 16459132, '+']
ENST00000443980	1007	1026	0.2339	['chr1', 16459155, '+']	['chr1', 16459174, '+']
ENST00000443980	1033	1115	0.2929	['chr1', 16459181, '+']	['chr1', 16459263, '+']
ENST00000443980	1118	1140	0.243	['chr1', 16459266, '+']	['chr1', 16459288, '+']
ENST00000443980	1241	1260	0.24091	['chr1', 16459389, '+']	['chr1', 16459408, '+']
ENST00000443980	1463	1512	0.297	['chr1', 16459611, '+']	['chr1', 16459660, '+']
ENST00000443980	1676	1696	0.258	['chr1', 16459824, '+']	['chr1', 16459844, '+']
ENST00000443980	1797	1847	0.2773	['chr1', 16459945, '+']	['chr1', 16459995, '+']
ENST00000492095	252	306	0.30818	['chr1', 16447909, '+']	['chr1', 16447963, '+']
ENST00000492095	507	540	0.25957	['chr1', 16449200, '+']	['chr1', 16451869, '+']
ENST00000492095	548	567	0.23625	['chr1', 16451877, '+']	['chr1', 16451896, '+']
ENST00000492095	974	993	0.23105	['chr1', 16459053, '+']	['chr1', 16459283, '+']
ENST00000492095	1099	1118	0.24091	['chr1', 16459389, '+']	['chr1', 16459408, '+']
ENST00000492095	1321	1370	0.297	['chr1', 16459611, '+']	['chr1', 16459660, '+']
ENST00000492095	1534	1554	0.258	['chr1', 16459824, '+']	['chr1', 16459844, '+']
ENST00000492095	1655	1705	0.2773	['chr1', 16459945, '+']	['chr1', 16459995, '+']
ENST00000513161	291	324	0.25957	['chr1', 16449200, '+']	['chr1', 16451869, '+']
ENST00000513161	332	351	0.23625	['chr1', 16451877, '+']	['chr1', 16451896, '+']
ENST00000330263	678	712	0.2764	['chr1', 19257872, '+']	['chr1', 19257906, '+']
ENST00000330263	898	922	0.2602	['chr1', 19258711, '+']	['chr1', 19258735, '+']
ENST00000330263	1042	1077	0.2407	['chr1', 19258855, '+']	['chr1', 19258890, '+']
ENST00000330263	1813	1839	0.2413	['chr1', 19259626, '+']	['chr1', 19259652, '+']
ENST00000330263	1940	1997	0.27435	['chr1', 19259753, '+']	['chr1', 19259810, '+']
ENST00000330263	1999	2027	0.2505	['chr1', 19259812, '+']	['chr1', 19259840, '+']
ENST00000479559	161	195	0.2764	['chr1', 19257872, '+']	['chr1', 19257906, '+']
ENST00000375155	85	113	0.25675	['chr1', 19312780, '+']	['chr1', 19312808, '+']
ENST00000375155	114	140	0.28335	['chr1', 19312809, '+']	['chr1', 19312835, '+']
ENST00000375155	172	202	0.26091	['chr1', 19312867, '+']	['chr1', 19317607, '+']
ENST00000375155	428	501	0.28064	['chr1', 19317833, '+']	['chr1', 19324697, '+']
ENST00000375155	515	541	0.2592	['chr1', 19324711, '+']	['chr1', 19324737, '+']
ENST00000375155	1011	1087	0.2991	['chr1', 19327347, '+']	['chr1', 19328582, '+']
ENST00000375155	1116	1148	0.2564	['chr1', 19328611, '+']	['chr1', 19328643, '+']
ENST00000469076	81	109	0.25675	['chr1', 19312780, '+']	['chr1', 19312808, '+']
ENST00000469076	110	136	0.28335	['chr1', 19312809, '+']	['chr1', 19312835, '+']
ENST00000469076	168	255	0.27932	['chr1', 19312867, '+']	['chr1', 19324697, '+']
ENST00000469076	269	295	0.2592	['chr1', 19324711, '+']	['chr1', 19324737, '+']
ENST00000469076	734	810	0.2991	['chr1', 19327347, '+']	['chr1', 19328582, '+']
ENST00000469076	839	871	0.2564	['chr1', 19328611, '+']	['chr1', 19328643, '+']
ENST00000400548	70	98	0.25675	['chr1', 19312780, '+']	['chr1', 19312808, '+']
ENST00000400548	99	125	0.28335	['chr1', 19312809, '+']	['chr1', 19312835, '+']
ENST00000400548	157	244	0.27932	['chr1', 19312867, '+']	['chr1', 19324697, '+']
ENST00000400548	258	284	0.2592	['chr1', 19324711, '+']	['chr1', 19324737, '+']
ENST00000400548	754	830	0.2991	['chr1', 19327347, '+']	['chr1', 19328582, '+']
ENST00000400548	859	891	0.2564	['chr1', 19328611, '+']	['chr1', 19328643, '+']
ENST00000497827	52	80	0.25675	['chr1', 19312780, '+']	['chr1', 19312808, '+']
ENST00000497827	81	107	0.28335	['chr1', 19312809, '+']	['chr1', 19312835, '+']
ENST00000497827	139	169	0.26091	['chr1', 19312867, '+']	['chr1', 19317607, '+']
ENST00000497827	395	468	0.28064	['chr1', 19317833, '+']	['chr1', 19324697, '+']
ENST00000497827	482	508	0.2592	['chr1', 19324711, '+']	['chr1', 19324737, '+']
ENST00000497827	947	1023	0.2991	['chr1', 19327347, '+']	['chr1', 19328582, '+']
ENST00000497827	1052	1084	0.2564	['chr1', 19328611, '+']	['chr1', 19328643, '+']
ENST00000602662	880	899	0.24373	['chr1', 19657313, '+']	['chr1', 19657332, '+']
ENST00000485362	396	415	0.24123	['chr1', 19626564, '+']	['chr1', 19626583, '+']
ENST00000621723	990	1009	0.24373	['chr1', 19657313, '+']	['chr1', 19657332, '+']
ENST00000375136	1033	1052	0.24373	['chr1', 19657313, '+']	['chr1', 19657332, '+']
ENST00000618761	908	927	0.24373	['chr1', 19657313, '+']	['chr1', 19657332, '+']
ENST00000615215	1017	1036	0.24373	['chr1', 19657313, '+']	['chr1', 19657332, '+']
ENST00000548815	810	829	0.24373	['chr1', 19657313, '+']	['chr1', 19657332, '+']
ENST00000622566	966	985	0.24373	['chr1', 19657313, '+']	['chr1', 19657332, '+']
ENST00000321556	878	913	0.2611	['chr1', 20644497, '+']	['chr1', 20644532, '+']
ENST00000321556	1074	1098	0.28373	['chr1', 20645580, '+']	['chr1', 20645604, '+']
ENST00000321556	1141	1161	0.24473	['chr1', 20645647, '+']	['chr1', 20645667, '+']
ENST00000321556	1632	1659	0.25395	['chr1', 20650483, '+']	['chr1', 20650510, '+']
ENST00000321556	1733	1771	0.35362	['chr1', 20650584, '+']	['chr1', 20650622, '+']
ENST00000321556	1915	1943	0.30191	['chr1', 20650766, '+']	['chr1', 20650794, '+']
ENST00000321556	2221	2246	0.26745	['chr1', 20651072, '+']	['chr1', 20651097, '+']
ENST00000321556	2385	2414	0.32173	['chr1', 20651236, '+']	['chr1', 20651265, '+']
ENST00000400259	615	635	0.2316	['chr1', 22086703, '+']	['chr1', 22086723, '+']
ENST00000400259	736	762	0.30645	['chr1', 22086824, '+']	['chr1', 22086850, '+']
ENST00000400259	808	842	0.27745	['chr1', 22091457, '+']	['chr1', 22091491, '+']
ENST00000400259	956	1003	0.2866	['chr1', 22091605, '+']	['chr1', 22091652, '+']
ENST00000400259	2138	2166	0.26535	['chr1', 22092787, '+']	['chr1', 22092815, '+']
ENST00000400259	2224	2244	0.24991	['chr1', 22092873, '+']	['chr1', 22092893, '+']
ENST00000344548	574	594	0.2316	['chr1', 22086703, '+']	['chr1', 22086723, '+']
ENST00000344548	695	721	0.30645	['chr1', 22086824, '+']	['chr1', 22086850, '+']
ENST00000344548	767	801	0.27745	['chr1', 22091457, '+']	['chr1', 22091491, '+']
ENST00000344548	915	962	0.2866	['chr1', 22091605, '+']	['chr1', 22091652, '+']
ENST00000344548	2097	2125	0.26535	['chr1', 22092787, '+']	['chr1', 22092815, '+']
ENST00000344548	2183	2219	0.29755	['chr1', 22092873, '+']	['chr1', 22092909, '+']
ENST00000356634	717	744	0.27135	['chr1', 23050437, '+']	['chr1', 23050464, '+']
ENST00000356634	789	809	0.243	['chr1', 23050509, '+']	['chr1', 23053769, '+']
ENST00000356634	964	998	0.306	['chr1', 23055153, '+']	['chr1', 23055957, '+']
ENST00000356634	1339	1360	0.24629	['chr1', 23068621, '+']	['chr1', 23068642, '+']
ENST00000356634	1379	1408	0.28729	['chr1', 23068661, '+']	['chr1', 23069069, '+']
ENST00000356634	1487	1507	0.23982	['chr1', 23069148, '+']	['chr1', 23071241, '+']
ENST00000356634	1562	1602	0.27525	['chr1', 23071296, '+']	['chr1', 23071336, '+']
ENST00000356634	1691	1724	0.30809	['chr1', 23072189, '+']	['chr1', 23073316, '+']
ENST00000356634	1898	1918	0.23485	['chr1', 23077314, '+']	['chr1', 23077334, '+']
ENST00000356634	2085	2159	0.2679	['chr1', 23079130, '+']	['chr1', 23079579, '+']
ENST00000356634	2162	2181	0.23071	['chr1', 23079582, '+']	['chr1', 23079601, '+']
ENST00000356634	2239	2259	0.24536	['chr1', 23079659, '+']	['chr1', 23081457, '+']
ENST00000356634	2450	2474	0.2384	['chr1', 23082294, '+']	['chr1', 23082318, '+']
ENST00000400181	732	759	0.27135	['chr1', 23050437, '+']	['chr1', 23050464, '+']
ENST00000400181	804	824	0.243	['chr1', 23050509, '+']	['chr1', 23053769, '+']
ENST00000400181	979	1013	0.306	['chr1', 23055153, '+']	['chr1', 23055957, '+']
ENST00000400181	1366	1387	0.24629	['chr1', 23068621, '+']	['chr1', 23068642, '+']
ENST00000400181	1406	1435	0.28729	['chr1', 23068661, '+']	['chr1', 23069069, '+']
ENST00000400181	1514	1534	0.23982	['chr1', 23069148, '+']	['chr1', 23071241, '+']
ENST00000400181	1589	1629	0.27525	['chr1', 23071296, '+']	['chr1', 23071336, '+']
ENST00000400181	1718	1751	0.30809	['chr1', 23072189, '+']	['chr1', 23073316, '+']
ENST00000400181	1925	1945	0.23485	['chr1', 23077314, '+']	['chr1', 23077334, '+']
ENST00000400181	2112	2186	0.2679	['chr1', 23079130, '+']	['chr1', 23079579, '+']
ENST00000400181	2189	2208	0.23071	['chr1', 23079582, '+']	['chr1', 23079601, '+']
ENST00000400181	2266	2286	0.24536	['chr1', 23079659, '+']	['chr1', 23081457, '+']
ENST00000400181	2477	2501	0.2384	['chr1', 23082294, '+']	['chr1', 23082318, '+']
ENST00000481879	13	40	0.27135	['chr1', 23050437, '+']	['chr1', 23050464, '+']
ENST00000481879	85	105	0.243	['chr1', 23050509, '+']	['chr1', 23053769, '+']
ENST00000465864	84	117	0.30809	['chr1', 23073283, '+']	['chr1', 23073316, '+']
ENST00000465864	291	311	0.23485	['chr1', 23077314, '+']	['chr1', 23077334, '+']
ENST00000465864	478	547	0.2679	['chr1', 23079130, '+']	['chr1', 23079574, '+']
ENST00000494920	81	101	0.23485	['chr1', 23077314, '+']	['chr1', 23077334, '+']
ENST00000494920	292	366	0.2679	['chr1', 23079130, '+']	['chr1', 23079579, '+']
ENST00000494920	369	388	0.23071	['chr1', 23079582, '+']	['chr1', 23079601, '+']
ENST00000494920	446	466	0.24536	['chr1', 23079659, '+']	['chr1', 23081457, '+']
ENST00000494920	657	681	0.2384	['chr1', 23082294, '+']	['chr1', 23082318, '+']
ENST00000418390	1241	1263	0.26915	['chr1', 23751497, '+']	['chr1', 23751519, '+']
ENST00000418390	1468	1495	0.24875	['chr1', 23751724, '+']	['chr1', 23751751, '+']
ENST00000418390	1604	1637	0.2878	['chr1', 23751860, '+']	['chr1', 23751893, '+']
ENST00000418390	2137	2179	0.28421	['chr1', 23754457, '+']	['chr1', 23755881, '+']
ENST00000418390	2209	2240	0.27775	['chr1', 23755911, '+']	['chr1', 23755942, '+']
ENST00000418390	2948	2988	0.3925	['chr1', 23759853, '+']	['chr1', 23759893, '+']
ENST00000418390	3417	3454	0.30986	['chr1', 23760322, '+']	['chr1', 23760359, '+']
ENST00000418390	3812	3864	0.2647	['chr1', 23760717, '+']	['chr1', 23760769, '+']
ENST00000613537	1030	1052	0.26915	['chr1', 23751497, '+']	['chr1', 23751519, '+']
ENST00000613537	1257	1284	0.24875	['chr1', 23751724, '+']	['chr1', 23751751, '+']
ENST00000613537	1393	1426	0.2878	['chr1', 23751860, '+']	['chr1', 23751893, '+']
ENST00000613537	1926	1968	0.28421	['chr1', 23754457, '+']	['chr1', 23755881, '+']
ENST00000613537	1998	2029	0.27775	['chr1', 23755911, '+']	['chr1', 23755942, '+']
ENST00000613537	2737	2777	0.3925	['chr1', 23759853, '+']	['chr1', 23759893, '+']
ENST00000613537	3206	3243	0.30986	['chr1', 23760322, '+']	['chr1', 23760359, '+']
ENST00000613537	3601	3653	0.2647	['chr1', 23760717, '+']	['chr1', 23760769, '+']
ENST00000609199	924	946	0.26915	['chr1', 23751497, '+']	['chr1', 23751519, '+']
ENST00000609199	1151	1178	0.24875	['chr1', 23751724, '+']	['chr1', 23751751, '+']
ENST00000609199	1287	1320	0.2878	['chr1', 23751860, '+']	['chr1', 23751893, '+']
ENST00000609199	1820	1862	0.28421	['chr1', 23754457, '+']	['chr1', 23755881, '+']
ENST00000609199	1892	1923	0.27775	['chr1', 23755911, '+']	['chr1', 23755942, '+']
ENST00000374514	347	371	0.27009	['chr1', 23792722, '+']	['chr1', 23792746, '+']
ENST00000374514	708	739	0.25345	['chr1', 23794255, '+']	['chr1', 23794286, '+']
ENST00000374514	870	902	0.285	['chr1', 23794518, '+']	['chr1', 23794550, '+']
ENST00000374514	1354	1374	0.24115	['chr1', 23795083, '+']	['chr1', 23795103, '+']
ENST00000420982	130	154	0.27009	['chr1', 23792722, '+']	['chr1', 23792746, '+']
ENST00000420982	459	490	0.25345	['chr1', 23794255, '+']	['chr1', 23794286, '+']
ENST00000374505	130	154	0.27009	['chr1', 23792722, '+']	['chr1', 23792746, '+']
ENST00000374505	417	448	0.25345	['chr1', 23794255, '+']	['chr1', 23794286, '+']
ENST00000374505	680	712	0.285	['chr1', 23794518, '+']	['chr1', 23794550, '+']
ENST00000495365	114	138	0.27009	['chr1', 23792722, '+']	['chr1', 23792746, '+']
ENST00000495365	404	435	0.25345	['chr1', 23794255, '+']	['chr1', 23794286, '+']
ENST00000495365	566	598	0.285	['chr1', 23794518, '+']	['chr1', 23794550, '+']
ENST00000374503	114	138	0.27009	['chr1', 23792722, '+']	['chr1', 23792746, '+']
ENST00000374503	475	506	0.25345	['chr1', 23794255, '+']	['chr1', 23794286, '+']
ENST00000374502	96	120	0.27009	['chr1', 23792722, '+']	['chr1', 23792746, '+']
ENST00000374502	457	488	0.25345	['chr1', 23794255, '+']	['chr1', 23794286, '+']
ENST00000374502	720	752	0.285	['chr1', 23794518, '+']	['chr1', 23794550, '+']
ENST00000492577	113	137	0.27009	['chr1', 23792722, '+']	['chr1', 23792746, '+']
ENST00000492577	442	473	0.25345	['chr1', 23794255, '+']	['chr1', 23794286, '+']
ENST00000492577	604	636	0.285	['chr1', 23794518, '+']	['chr1', 23794550, '+']
ENST00000374501	277	308	0.25345	['chr1', 23794255, '+']	['chr1', 23794286, '+']
ENST00000374501	439	471	0.285	['chr1', 23794518, '+']	['chr1', 23794550, '+']
ENST00000374501	923	943	0.24115	['chr1', 23795083, '+']	['chr1', 23795103, '+']
ENST00000472213	77	108	0.25345	['chr1', 23794255, '+']	['chr1', 23794286, '+']
ENST00000472213	340	372	0.285	['chr1', 23794518, '+']	['chr1', 23794550, '+']
ENST00000478890	133	158	0.25827	['chr1', 24646675, '+']	['chr1', 24646700, '+']
ENST00000478890	252	283	0.30025	['chr1', 24648863, '+']	['chr1', 24648894, '+']
ENST00000478890	286	315	0.2447	['chr1', 24648897, '+']	['chr1', 24648926, '+']
ENST00000478890	388	423	0.26539	['chr1', 24648999, '+']	['chr1', 24649975, '+']
ENST00000323848	435	460	0.25827	['chr1', 24646675, '+']	['chr1', 24646700, '+']
ENST00000323848	554	585	0.30025	['chr1', 24648863, '+']	['chr1', 24648894, '+']
ENST00000323848	588	617	0.2447	['chr1', 24648897, '+']	['chr1', 24648926, '+']
ENST00000323848	690	725	0.26539	['chr1', 24648999, '+']	['chr1', 24649975, '+']
ENST00000323848	1016	1049	0.2514	['chr1', 24651588, '+']	['chr1', 24652442, '+']
ENST00000323848	1565	1607	0.26735	['chr1', 24655064, '+']	['chr1', 24655106, '+']
ENST00000323848	2019	2065	0.3253	['chr1', 24666890, '+']	['chr1', 24669133, '+']
ENST00000323848	2228	2254	0.2754	['chr1', 24669296, '+']	['chr1', 24669322, '+']
ENST00000323848	2544	2572	0.29975	['chr1', 24670144, '+']	['chr1', 24670172, '+']
ENST00000323848	2591	2616	0.26545	['chr1', 24670191, '+']	['chr1', 24670216, '+']
ENST00000323848	2674	2693	0.2407	['chr1', 24670274, '+']	['chr1', 24670293, '+']
ENST00000323848	3646	3679	0.25759	['chr1', 24672902, '+']	['chr1', 24672935, '+']
ENST00000468822	172	197	0.25827	['chr1', 24646675, '+']	['chr1', 24646700, '+']
ENST00000468822	291	322	0.30025	['chr1', 24648863, '+']	['chr1', 24648894, '+']
ENST00000468822	325	354	0.2447	['chr1', 24648897, '+']	['chr1', 24648926, '+']
ENST00000468822	427	462	0.26539	['chr1', 24648999, '+']	['chr1', 24649975, '+']
ENST00000468822	663	696	0.2514	['chr1', 24651588, '+']	['chr1', 24652442, '+']
ENST00000374389	148	173	0.25827	['chr1', 24646675, '+']	['chr1', 24646700, '+']
ENST00000374389	267	298	0.30025	['chr1', 24648863, '+']	['chr1', 24648894, '+']
ENST00000374389	301	330	0.2447	['chr1', 24648897, '+']	['chr1', 24648926, '+']
ENST00000374389	403	438	0.26539	['chr1', 24648999, '+']	['chr1', 24649975, '+']
ENST00000374389	729	762	0.2514	['chr1', 24651588, '+']	['chr1', 24652442, '+']
ENST00000374389	1263	1305	0.26735	['chr1', 24655064, '+']	['chr1', 24655106, '+']
ENST00000374389	1759	1805	0.3253	['chr1', 24666890, '+']	['chr1', 24669133, '+']
ENST00000374389	1968	1994	0.2754	['chr1', 24669296, '+']	['chr1', 24669322, '+']
ENST00000374389	2284	2312	0.29975	['chr1', 24670144, '+']	['chr1', 24670172, '+']
ENST00000374389	2331	2356	0.26545	['chr1', 24670191, '+']	['chr1', 24670216, '+']
ENST00000374389	2414	2433	0.2407	['chr1', 24670274, '+']	['chr1', 24670293, '+']
ENST00000490543	142	167	0.25827	['chr1', 24646675, '+']	['chr1', 24646700, '+']
ENST00000490543	391	422	0.30025	['chr1', 24648863, '+']	['chr1', 24648894, '+']
ENST00000490543	425	454	0.2447	['chr1', 24648897, '+']	['chr1', 24648926, '+']
ENST00000490543	527	562	0.26539	['chr1', 24648999, '+']	['chr1', 24649975, '+']
ENST00000479034	139	164	0.25827	['chr1', 24646675, '+']	['chr1', 24646700, '+']
ENST00000479034	258	289	0.30025	['chr1', 24648863, '+']	['chr1', 24648894, '+']
ENST00000479034	292	321	0.2447	['chr1', 24648897, '+']	['chr1', 24648926, '+']
ENST00000479034	394	429	0.26539	['chr1', 24648999, '+']	['chr1', 24649975, '+']
ENST00000479034	720	753	0.2514	['chr1', 24651588, '+']	['chr1', 24652442, '+']
ENST00000479034	1269	1311	0.26735	['chr1', 24655064, '+']	['chr1', 24655106, '+']
ENST00000479034	1765	1811	0.3253	['chr1', 24666890, '+']	['chr1', 24669133, '+']
ENST00000479034	1974	2000	0.2754	['chr1', 24669296, '+']	['chr1', 24669322, '+']
ENST00000479034	2290	2318	0.29975	['chr1', 24670144, '+']	['chr1', 24670172, '+']
ENST00000479034	2337	2362	0.26545	['chr1', 24670191, '+']	['chr1', 24670216, '+']
ENST00000479034	2420	2439	0.2407	['chr1', 24670274, '+']	['chr1', 24670293, '+']
ENST00000447431	125	150	0.25827	['chr1', 24646675, '+']	['chr1', 24646700, '+']
ENST00000447431	244	275	0.30025	['chr1', 24648863, '+']	['chr1', 24648894, '+']
ENST00000447431	278	307	0.2447	['chr1', 24648897, '+']	['chr1', 24648926, '+']
ENST00000447431	380	415	0.26539	['chr1', 24648999, '+']	['chr1', 24649975, '+']
ENST00000447431	706	739	0.2514	['chr1', 24651588, '+']	['chr1', 24652442, '+']
ENST00000447431	1252	1294	0.26735	['chr1', 24655064, '+']	['chr1', 24655106, '+']
ENST00000447431	1706	1752	0.3253	['chr1', 24666890, '+']	['chr1', 24669133, '+']
ENST00000447431	1915	1941	0.2754	['chr1', 24669296, '+']	['chr1', 24669322, '+']
ENST00000447431	2231	2259	0.29975	['chr1', 24670144, '+']	['chr1', 24670172, '+']
ENST00000447431	2278	2303	0.26545	['chr1', 24670191, '+']	['chr1', 24670216, '+']
ENST00000447431	3331	3364	0.25759	['chr1', 24672902, '+']	['chr1', 24672935, '+']
ENST00000596378	273	298	0.25827	['chr1', 24646675, '+']	['chr1', 24646700, '+']
ENST00000596378	392	423	0.30025	['chr1', 24648863, '+']	['chr1', 24648894, '+']
ENST00000596378	426	455	0.2447	['chr1', 24648897, '+']	['chr1', 24648926, '+']
ENST00000596378	528	563	0.26539	['chr1', 24648999, '+']	['chr1', 24649975, '+']
ENST00000596378	854	887	0.2514	['chr1', 24651588, '+']	['chr1', 24652442, '+']
ENST00000596378	1403	1445	0.26735	['chr1', 24655064, '+']	['chr1', 24655106, '+']
ENST00000596378	1893	1939	0.3253	['chr1', 24666890, '+']	['chr1', 24669133, '+']
ENST00000596378	2102	2128	0.2754	['chr1', 24669296, '+']	['chr1', 24669322, '+']
ENST00000494934	330	361	0.30025	['chr1', 24648863, '+']	['chr1', 24648894, '+']
ENST00000494934	364	393	0.2447	['chr1', 24648897, '+']	['chr1', 24648926, '+']
ENST00000494934	466	501	0.26539	['chr1', 24648999, '+']	['chr1', 24649975, '+']
ENST00000494934	702	735	0.2514	['chr1', 24651588, '+']	['chr1', 24652442, '+']
ENST00000495561	246	277	0.30025	['chr1', 24648863, '+']	['chr1', 24648894, '+']
ENST00000495561	280	309	0.2447	['chr1', 24648897, '+']	['chr1', 24648926, '+']
ENST00000495561	382	417	0.26539	['chr1', 24648999, '+']	['chr1', 24649975, '+']
ENST00000485441	342	375	0.2514	['chr1', 24651588, '+']	['chr1', 24652442, '+']
ENST00000470243	69	102	0.2514	['chr1', 24651588, '+']	['chr1', 24652442, '+']
ENST00000470243	656	700	0.26735	['chr1', 24655064, '+']	['chr1', 24655108, '+']
ENST00000496882	462	504	0.26735	['chr1', 24655064, '+']	['chr1', 24655106, '+']
ENST00000461768	54	96	0.26735	['chr1', 24655064, '+']	['chr1', 24655106, '+']
ENST00000485541	43	85	0.26735	['chr1', 24655064, '+']	['chr1', 24655106, '+']
ENST00000489758	30	55	0.25708	['chr1', 24745438, '+']	['chr1', 24745463, '+']
ENST00000498135	141	176	0.2532	['chr1', 25340474, '+']	['chr1', 25340509, '+']
ENST00000498135	214	234	0.2387	['chr1', 25340547, '+']	['chr1', 25340567, '+']
ENST00000498135	475	508	0.2691	['chr1', 25360666, '+']	['chr1', 25360699, '+']
ENST00000498135	634	653	0.2337	['chr1', 25360825, '+']	['chr1', 25360844, '+']
ENST00000491936	366	399	0.2691	['chr1', 25360666, '+']	['chr1', 25360699, '+']
ENST00000491936	525	544	0.2337	['chr1', 25360825, '+']	['chr1', 25360844, '+']
ENST00000480937	135	170	0.2532	['chr1', 25340474, '+']	['chr1', 25340509, '+']
ENST00000480937	208	286	0.3125	['chr1', 25340547, '+']	['chr1', 25343006, '+']
ENST00000480937	489	522	0.2691	['chr1', 25360666, '+']	['chr1', 25360699, '+']
ENST00000480937	648	667	0.2337	['chr1', 25360825, '+']	['chr1', 25360844, '+']
ENST00000354177	160	179	0.2338	['chr1', 25800335, '+']	['chr1', 25800354, '+']
ENST00000361547	160	179	0.2338	['chr1', 25800335, '+']	['chr1', 25800354, '+']
ENST00000374315	143	162	0.2338	['chr1', 25800335, '+']	['chr1', 25800354, '+']
ENST00000527604	228	247	0.23073	['chr1', 25823123, '+']	['chr1', 25823657, '+']
ENST00000424294	318	337	0.23073	['chr1', 25823123, '+']	['chr1', 25823657, '+']
ENST00000424294	422	443	0.28427	['chr1', 25823742, '+']	['chr1', 25826316, '+']
ENST00000424294	530	549	0.23127	['chr1', 25826403, '+']	['chr1', 25826625, '+']
ENST00000374303	229	248	0.23073	['chr1', 25823123, '+']	['chr1', 25823657, '+']
ENST00000374303	333	354	0.28427	['chr1', 25823742, '+']	['chr1', 25826316, '+']
ENST00000374303	441	460	0.23127	['chr1', 25826403, '+']	['chr1', 25826625, '+']
ENST00000374303	766	789	0.2364	['chr1', 25829613, '+']	['chr1', 25829636, '+']
ENST00000374303	961	981	0.23505	['chr1', 25829808, '+']	['chr1', 25829828, '+']
ENST00000374303	1037	1063	0.23885	['chr1', 25831974, '+']	['chr1', 25832000, '+']
ENST00000374303	1275	1298	0.32191	['chr1', 25832212, '+']	['chr1', 25832235, '+']
ENST00000374303	1347	1372	0.26335	['chr1', 25832284, '+']	['chr1', 25832309, '+']
ENST00000374303	1401	1433	0.26577	['chr1', 25832338, '+']	['chr1', 25832370, '+']
ENST00000374303	1824	1849	0.25305	['chr1', 25832761, '+']	['chr1', 25832786, '+']
ENST00000533762	409	428	0.23073	['chr1', 25823434, '+']	['chr1', 25823657, '+']
ENST00000533762	513	534	0.28427	['chr1', 25823742, '+']	['chr1', 25826316, '+']
ENST00000533762	621	640	0.23127	['chr1', 25826403, '+']	['chr1', 25826625, '+']
ENST00000529116	229	248	0.23073	['chr1', 25823123, '+']	['chr1', 25823657, '+']
ENST00000529116	333	354	0.28427	['chr1', 25823742, '+']	['chr1', 25826316, '+']
ENST00000529116	441	460	0.23127	['chr1', 25826403, '+']	['chr1', 25826625, '+']
ENST00000474295	206	225	0.23073	['chr1', 25823123, '+']	['chr1', 25823657, '+']
ENST00000474295	310	331	0.28427	['chr1', 25823742, '+']	['chr1', 25826316, '+']
ENST00000474295	418	437	0.23127	['chr1', 25826403, '+']	['chr1', 25826625, '+']
ENST00000474295	829	849	0.23505	['chr1', 25829808, '+']	['chr1', 25829828, '+']
ENST00000474295	905	931	0.23885	['chr1', 25831974, '+']	['chr1', 25832000, '+']
ENST00000474295	1143	1166	0.32191	['chr1', 25832212, '+']	['chr1', 25832235, '+']
ENST00000474295	1215	1240	0.26335	['chr1', 25832284, '+']	['chr1', 25832309, '+']
ENST00000474295	1269	1301	0.26577	['chr1', 25832338, '+']	['chr1', 25832370, '+']
ENST00000474295	1692	1717	0.25305	['chr1', 25832761, '+']	['chr1', 25832786, '+']
ENST00000488327	109	128	0.23073	['chr1', 25823638, '+']	['chr1', 25823657, '+']
ENST00000488327	213	234	0.28427	['chr1', 25823742, '+']	['chr1', 25826316, '+']
ENST00000488327	321	340	0.23127	['chr1', 25826403, '+']	['chr1', 25826625, '+']
ENST00000472643	85	104	0.23073	['chr1', 25820024, '+']	['chr1', 25823657, '+']
ENST00000472643	189	210	0.28427	['chr1', 25823742, '+']	['chr1', 25826316, '+']
ENST00000472643	297	316	0.23127	['chr1', 25826403, '+']	['chr1', 25826625, '+']
ENST00000472643	622	645	0.2364	['chr1', 25829613, '+']	['chr1', 25829636, '+']
ENST00000469815	47	66	0.23073	['chr1', 25820024, '+']	['chr1', 25823657, '+']
ENST00000469815	262	285	0.2364	['chr1', 25829613, '+']	['chr1', 25829636, '+']
ENST00000469815	457	477	0.23505	['chr1', 25829808, '+']	['chr1', 25829828, '+']
ENST00000469815	533	559	0.23885	['chr1', 25831974, '+']	['chr1', 25832000, '+']
ENST00000469815	771	794	0.32191	['chr1', 25832212, '+']	['chr1', 25832235, '+']
ENST00000469815	843	872	0.32109	['chr1', 25832284, '+']	['chr1', 25832313, '+']
ENST00000526894	156	175	0.23073	['chr1', 25823123, '+']	['chr1', 25823657, '+']
ENST00000526894	260	281	0.28427	['chr1', 25823742, '+']	['chr1', 25826316, '+']
ENST00000526894	368	387	0.23127	['chr1', 25826403, '+']	['chr1', 25826625, '+']
ENST00000478284	248	267	0.23073	['chr1', 25823434, '+']	['chr1', 25823657, '+']
ENST00000478284	352	373	0.28427	['chr1', 25823742, '+']	['chr1', 25826316, '+']
ENST00000478284	460	479	0.23127	['chr1', 25826403, '+']	['chr1', 25826625, '+']
ENST00000524618	172	191	0.23073	['chr1', 25823638, '+']	['chr1', 25823657, '+']
ENST00000524618	276	297	0.28427	['chr1', 25823742, '+']	['chr1', 25826316, '+']
ENST00000524618	384	403	0.23127	['chr1', 25826403, '+']	['chr1', 25826625, '+']
ENST00000524618	709	732	0.2364	['chr1', 25829613, '+']	['chr1', 25829636, '+']
ENST00000524618	904	924	0.23505	['chr1', 25829808, '+']	['chr1', 25829828, '+']
ENST00000524618	980	1006	0.23885	['chr1', 25831974, '+']	['chr1', 25832000, '+']
ENST00000374307	132	151	0.23073	['chr1', 25823123, '+']	['chr1', 25823657, '+']
ENST00000374307	236	257	0.28427	['chr1', 25823742, '+']	['chr1', 25826316, '+']
ENST00000374307	344	363	0.23127	['chr1', 25826403, '+']	['chr1', 25826625, '+']
ENST00000374307	633	656	0.2364	['chr1', 25829613, '+']	['chr1', 25829636, '+']
ENST00000374307	828	848	0.23505	['chr1', 25829808, '+']	['chr1', 25829828, '+']
ENST00000374307	904	930	0.23885	['chr1', 25831974, '+']	['chr1', 25832000, '+']
ENST00000374307	1142	1165	0.32191	['chr1', 25832212, '+']	['chr1', 25832235, '+']
ENST00000374307	1214	1239	0.26335	['chr1', 25832284, '+']	['chr1', 25832309, '+']
ENST00000374307	1268	1300	0.26577	['chr1', 25832338, '+']	['chr1', 25832370, '+']
ENST00000374307	1691	1716	0.25305	['chr1', 25832761, '+']	['chr1', 25832786, '+']
ENST00000528624	353	372	0.23073	['chr1', 25823318, '+']	['chr1', 25823657, '+']
ENST00000528624	457	478	0.28427	['chr1', 25823742, '+']	['chr1', 25826316, '+']
ENST00000525713	262	281	0.23073	['chr1', 25823123, '+']	['chr1', 25823657, '+']
ENST00000525713	366	387	0.28427	['chr1', 25823742, '+']	['chr1', 25826316, '+']
ENST00000525713	474	493	0.23127	['chr1', 25826403, '+']	['chr1', 25826625, '+']
ENST00000374301	327	346	0.23073	['chr1', 25823123, '+']	['chr1', 25823657, '+']
ENST00000374301	431	452	0.28427	['chr1', 25823742, '+']	['chr1', 25826316, '+']
ENST00000374301	539	558	0.23127	['chr1', 25826403, '+']	['chr1', 25826625, '+']
ENST00000374301	864	887	0.2364	['chr1', 25829613, '+']	['chr1', 25829636, '+']
ENST00000374301	1059	1079	0.23505	['chr1', 25829808, '+']	['chr1', 25829828, '+']
ENST00000374301	1135	1161	0.23885	['chr1', 25831974, '+']	['chr1', 25832000, '+']
ENST00000374301	1373	1396	0.32191	['chr1', 25832212, '+']	['chr1', 25832235, '+']
ENST00000374301	1445	1470	0.26335	['chr1', 25832284, '+']	['chr1', 25832309, '+']
ENST00000374301	1499	1531	0.26577	['chr1', 25832338, '+']	['chr1', 25832370, '+']
ENST00000374301	1922	1947	0.25305	['chr1', 25832761, '+']	['chr1', 25832786, '+']
ENST00000464008	619	638	0.23073	['chr1', 25823318, '+']	['chr1', 25823657, '+']
ENST00000464008	723	744	0.28427	['chr1', 25823742, '+']	['chr1', 25826316, '+']
ENST00000464008	831	850	0.23127	['chr1', 25826403, '+']	['chr1', 25826625, '+']
ENST00000526158	322	341	0.23073	['chr1', 25823123, '+']	['chr1', 25823657, '+']
ENST00000526158	426	447	0.28427	['chr1', 25823742, '+']	['chr1', 25826316, '+']
ENST00000526158	534	553	0.23127	['chr1', 25826403, '+']	['chr1', 25826625, '+']
ENST00000530599	351	370	0.23073	['chr1', 25823318, '+']	['chr1', 25823657, '+']
ENST00000530599	455	476	0.28427	['chr1', 25823742, '+']	['chr1', 25826316, '+']
ENST00000530599	563	582	0.23127	['chr1', 25826403, '+']	['chr1', 25826625, '+']
ENST00000374300	281	300	0.23073	['chr1', 25823123, '+']	['chr1', 25823657, '+']
ENST00000374300	385	406	0.28427	['chr1', 25823742, '+']	['chr1', 25826316, '+']
ENST00000374300	493	512	0.23127	['chr1', 25826403, '+']	['chr1', 25826625, '+']
ENST00000374300	818	841	0.2364	['chr1', 25829613, '+']	['chr1', 25829636, '+']
ENST00000374300	1013	1033	0.23505	['chr1', 25829808, '+']	['chr1', 25829828, '+']
ENST00000374300	1089	1115	0.23885	['chr1', 25831974, '+']	['chr1', 25832000, '+']
ENST00000374300	1327	1350	0.32191	['chr1', 25832212, '+']	['chr1', 25832235, '+']
ENST00000374300	1399	1424	0.26335	['chr1', 25832284, '+']	['chr1', 25832309, '+']
ENST00000374300	1453	1485	0.26577	['chr1', 25832338, '+']	['chr1', 25832370, '+']
ENST00000374300	1876	1901	0.25305	['chr1', 25832761, '+']	['chr1', 25832786, '+']
ENST00000466284	1601	1620	0.23073	['chr1', 25823123, '+']	['chr1', 25823657, '+']
ENST00000466284	1705	1726	0.28427	['chr1', 25823742, '+']	['chr1', 25826316, '+']
ENST00000466284	1813	1832	0.23127	['chr1', 25826403, '+']	['chr1', 25826625, '+']
ENST00000466284	2224	2244	0.23505	['chr1', 25829808, '+']	['chr1', 25829828, '+']
ENST00000466284	2300	2326	0.23885	['chr1', 25831974, '+']	['chr1', 25832000, '+']
ENST00000466284	2538	2561	0.32191	['chr1', 25832212, '+']	['chr1', 25832235, '+']
ENST00000466284	2610	2635	0.26335	['chr1', 25832284, '+']	['chr1', 25832309, '+']
ENST00000466284	2664	2696	0.26577	['chr1', 25832338, '+']	['chr1', 25832370, '+']
ENST00000466284	3087	3112	0.25305	['chr1', 25832761, '+']	['chr1', 25832786, '+']
ENST00000531361	128	147	0.23073	['chr1', 25823123, '+']	['chr1', 25823657, '+']
ENST00000531361	232	253	0.28427	['chr1', 25823742, '+']	['chr1', 25826316, '+']
ENST00000531361	453	476	0.2364	['chr1', 25829613, '+']	['chr1', 25829636, '+']
ENST00000497956	664	685	0.28427	['chr1', 25826295, '+']	['chr1', 25826316, '+']
ENST00000497956	975	994	0.23127	['chr1', 25826606, '+']	['chr1', 25826625, '+']
ENST00000497956	1300	1323	0.2364	['chr1', 25829613, '+']	['chr1', 25829636, '+']
ENST00000497956	1495	1515	0.23505	['chr1', 25829808, '+']	['chr1', 25829828, '+']
ENST00000497956	1571	1597	0.23885	['chr1', 25831974, '+']	['chr1', 25832000, '+']
ENST00000497956	1809	1832	0.32191	['chr1', 25832212, '+']	['chr1', 25832235, '+']
ENST00000497956	1881	1906	0.26335	['chr1', 25832284, '+']	['chr1', 25832309, '+']
ENST00000497956	1935	1967	0.26577	['chr1', 25832338, '+']	['chr1', 25832370, '+']
ENST00000497956	2358	2383	0.25305	['chr1', 25832761, '+']	['chr1', 25832786, '+']
ENST00000526040	424	462	0.2971	['chr1', 26551718, '+']	['chr1', 26553423, '+']
ENST00000374168	617	655	0.2971	['chr1', 26551718, '+']	['chr1', 26553423, '+']
ENST00000374168	671	690	0.23545	['chr1', 26553439, '+']	['chr1', 26553458, '+']
ENST00000374168	703	722	0.23627	['chr1', 26553471, '+']	['chr1', 26553490, '+']
ENST00000374168	808	836	0.25285	['chr1', 26554636, '+']	['chr1', 26554664, '+']
ENST00000374168	1772	1804	0.29275	['chr1', 26571476, '+']	['chr1', 26571508, '+']
ENST00000374168	1810	1829	0.24355	['chr1', 26571514, '+']	['chr1', 26571533, '+']
ENST00000374168	2324	2350	0.2398	['chr1', 26574163, '+']	['chr1', 26574189, '+']
ENST00000374168	2803	2826	0.24185	['chr1', 26574642, '+']	['chr1', 26574665, '+']
ENST00000374166	606	644	0.2971	['chr1', 26551718, '+']	['chr1', 26553423, '+']
ENST00000374166	660	679	0.23545	['chr1', 26553439, '+']	['chr1', 26553458, '+']
ENST00000374166	692	711	0.23627	['chr1', 26553471, '+']	['chr1', 26553490, '+']
ENST00000374166	797	825	0.25285	['chr1', 26554636, '+']	['chr1', 26554664, '+']
ENST00000374166	1728	1760	0.29275	['chr1', 26571476, '+']	['chr1', 26571508, '+']
ENST00000374166	1766	1785	0.24355	['chr1', 26571514, '+']	['chr1', 26571533, '+']
ENST00000374166	2280	2306	0.2398	['chr1', 26574163, '+']	['chr1', 26574189, '+']
ENST00000374166	2759	2782	0.24185	['chr1', 26574642, '+']	['chr1', 26574665, '+']
ENST00000526792	621	659	0.2971	['chr1', 26551718, '+']	['chr1', 26553423, '+']
ENST00000526792	675	694	0.23545	['chr1', 26553439, '+']	['chr1', 26553458, '+']
ENST00000526792	707	726	0.23627	['chr1', 26553471, '+']	['chr1', 26553490, '+']
ENST00000526792	812	840	0.25285	['chr1', 26554636, '+']	['chr1', 26554664, '+']
ENST00000526792	1776	1808	0.29275	['chr1', 26571476, '+']	['chr1', 26571508, '+']
ENST00000526792	1814	1833	0.24355	['chr1', 26571514, '+']	['chr1', 26571533, '+']
ENST00000526792	2328	2354	0.2398	['chr1', 26574163, '+']	['chr1', 26574189, '+']
ENST00000529454	394	432	0.2971	['chr1', 26551718, '+']	['chr1', 26553423, '+']
ENST00000529454	448	467	0.23545	['chr1', 26553439, '+']	['chr1', 26553458, '+']
ENST00000529454	480	499	0.23627	['chr1', 26553471, '+']	['chr1', 26553490, '+']
ENST00000530003	465	503	0.2971	['chr1', 26551718, '+']	['chr1', 26553423, '+']
ENST00000530003	519	538	0.23545	['chr1', 26553439, '+']	['chr1', 26553458, '+']
ENST00000530003	551	570	0.23627	['chr1', 26553471, '+']	['chr1', 26553490, '+']
ENST00000530003	656	684	0.25285	['chr1', 26554636, '+']	['chr1', 26554664, '+']
ENST00000530003	1620	1652	0.29275	['chr1', 26571476, '+']	['chr1', 26571508, '+']
ENST00000530003	1658	1677	0.24355	['chr1', 26571514, '+']	['chr1', 26571533, '+']
ENST00000530003	2172	2198	0.2398	['chr1', 26574163, '+']	['chr1', 26574189, '+']
ENST00000530003	2651	2674	0.24185	['chr1', 26574642, '+']	['chr1', 26574665, '+']
ENST00000531113	415	453	0.2971	['chr1', 26551718, '+']	['chr1', 26553423, '+']
ENST00000531113	469	488	0.23545	['chr1', 26553439, '+']	['chr1', 26553458, '+']
ENST00000531113	501	520	0.23627	['chr1', 26553471, '+']	['chr1', 26553490, '+']
ENST00000531113	606	634	0.25285	['chr1', 26554636, '+']	['chr1', 26554664, '+']
ENST00000531113	1570	1602	0.29275	['chr1', 26571476, '+']	['chr1', 26571508, '+']
ENST00000531113	1608	1627	0.24355	['chr1', 26571514, '+']	['chr1', 26571533, '+']
ENST00000374163	628	666	0.2971	['chr1', 26552891, '+']	['chr1', 26553423, '+']
ENST00000374163	682	701	0.23545	['chr1', 26553439, '+']	['chr1', 26553458, '+']
ENST00000374163	714	733	0.23627	['chr1', 26553471, '+']	['chr1', 26553490, '+']
ENST00000374163	819	847	0.25285	['chr1', 26554636, '+']	['chr1', 26554664, '+']
ENST00000374163	1783	1815	0.29275	['chr1', 26571476, '+']	['chr1', 26571508, '+']
ENST00000374163	1821	1840	0.24355	['chr1', 26571514, '+']	['chr1', 26571533, '+']
ENST00000374163	2335	2361	0.2398	['chr1', 26574163, '+']	['chr1', 26574189, '+']
ENST00000374163	2814	2837	0.24185	['chr1', 26574642, '+']	['chr1', 26574665, '+']
ENST00000531382	539	577	0.2971	['chr1', 26551718, '+']	['chr1', 26553423, '+']
ENST00000531382	593	612	0.23545	['chr1', 26553439, '+']	['chr1', 26553458, '+']
ENST00000531382	625	644	0.23627	['chr1', 26553471, '+']	['chr1', 26553490, '+']
ENST00000531382	730	758	0.25285	['chr1', 26554636, '+']	['chr1', 26554664, '+']
ENST00000531382	1694	1726	0.29275	['chr1', 26571476, '+']	['chr1', 26571508, '+']
ENST00000531382	1732	1751	0.24355	['chr1', 26571514, '+']	['chr1', 26571533, '+']
ENST00000531382	2246	2272	0.2398	['chr1', 26574163, '+']	['chr1', 26574189, '+']
ENST00000527264	184	222	0.2971	['chr1', 26551718, '+']	['chr1', 26553423, '+']
ENST00000527264	238	257	0.23545	['chr1', 26553439, '+']	['chr1', 26553458, '+']
ENST00000527264	270	289	0.23627	['chr1', 26553471, '+']	['chr1', 26553490, '+']
ENST00000530305	248	280	0.29275	['chr1', 26571476, '+']	['chr1', 26571508, '+']
ENST00000530305	286	305	0.24355	['chr1', 26571514, '+']	['chr1', 26571533, '+']
ENST00000438977	247	273	0.2398	['chr1', 26574163, '+']	['chr1', 26574189, '+']
ENST00000438977	547	570	0.24185	['chr1', 26574642, '+']	['chr1', 26574665, '+']
ENST00000430799	712	732	0.24395	['chr1', 26731268, '+']	['chr1', 26731288, '+']
ENST00000430799	850	875	0.24325	['chr1', 26731406, '+']	['chr1', 26731431, '+']
ENST00000430799	980	1003	0.23815	['chr1', 26731536, '+']	['chr1', 26731559, '+']
ENST00000430799	1046	1072	0.2604	['chr1', 26731602, '+']	['chr1', 26732699, '+']
ENST00000430799	1533	1553	0.2402	['chr1', 26762188, '+']	['chr1', 26762208, '+']
ENST00000430799	1568	1591	0.24965	['chr1', 26762223, '+']	['chr1', 26762246, '+']
ENST00000430799	1704	1733	0.25465	['chr1', 26763012, '+']	['chr1', 26763041, '+']
ENST00000430799	1766	1810	0.26185	['chr1', 26763074, '+']	['chr1', 26763118, '+']
ENST00000430799	1918	1947	0.24645	['chr1', 26763226, '+']	['chr1', 26763255, '+']
ENST00000430799	2148	2186	0.29445	['chr1', 26766481, '+']	['chr1', 26766519, '+']
ENST00000430799	2490	2513	0.25005	['chr1', 26771165, '+']	['chr1', 26771188, '+']
ENST00000430799	2519	2538	0.23155	['chr1', 26771194, '+']	['chr1', 26771213, '+']
ENST00000430799	2679	2739	0.31995	['chr1', 26772527, '+']	['chr1', 26772587, '+']
ENST00000430799	2777	2797	0.24258	['chr1', 26772625, '+']	['chr1', 26772827, '+']
ENST00000430799	2811	2847	0.25685	['chr1', 26772841, '+']	['chr1', 26772877, '+']
ENST00000430799	4184	4206	0.2395	['chr1', 26775169, '+']	['chr1', 26775191, '+']
ENST00000430799	4245	4266	0.24555	['chr1', 26775586, '+']	['chr1', 26775607, '+']
ENST00000430799	4280	4300	0.24538	['chr1', 26775621, '+']	['chr1', 26775641, '+']
ENST00000430799	6135	6185	0.2572	['chr1', 26780791, '+']	['chr1', 26780841, '+']
ENST00000430799	6221	6251	0.25735	['chr1', 26780877, '+']	['chr1', 26780907, '+']
ENST00000430799	6478	6500	0.26725	['chr1', 26781134, '+']	['chr1', 26781156, '+']
ENST00000637465	399	419	0.24395	['chr1', 26731268, '+']	['chr1', 26731288, '+']
ENST00000637465	537	562	0.24325	['chr1', 26731406, '+']	['chr1', 26731431, '+']
ENST00000324856	666	685	0.23125	['chr1', 26696698, '+']	['chr1', 26696717, '+']
ENST00000324856	824	854	0.24305	['chr1', 26696856, '+']	['chr1', 26696886, '+']
ENST00000324856	875	900	0.26091	['chr1', 26696907, '+']	['chr1', 26696932, '+']
ENST00000324856	1111	1134	0.26046	['chr1', 26697143, '+']	['chr1', 26697166, '+']
ENST00000324856	1431	1453	0.27275	['chr1', 26697463, '+']	['chr1', 26697485, '+']
ENST00000324856	1838	1858	0.24395	['chr1', 26731268, '+']	['chr1', 26731288, '+']
ENST00000324856	1976	2001	0.24325	['chr1', 26731406, '+']	['chr1', 26731431, '+']
ENST00000324856	2106	2129	0.23815	['chr1', 26731536, '+']	['chr1', 26731559, '+']
ENST00000324856	2172	2198	0.2604	['chr1', 26731602, '+']	['chr1', 26732699, '+']
ENST00000324856	2659	2679	0.2402	['chr1', 26762188, '+']	['chr1', 26762208, '+']
ENST00000324856	2694	2717	0.24965	['chr1', 26762223, '+']	['chr1', 26762246, '+']
ENST00000324856	2830	2859	0.25465	['chr1', 26763012, '+']	['chr1', 26763041, '+']
ENST00000324856	2892	2936	0.26185	['chr1', 26763074, '+']	['chr1', 26763118, '+']
ENST00000324856	3044	3073	0.24645	['chr1', 26763226, '+']	['chr1', 26763255, '+']
ENST00000324856	3274	3312	0.29445	['chr1', 26766481, '+']	['chr1', 26766519, '+']
ENST00000324856	3616	3639	0.25005	['chr1', 26771165, '+']	['chr1', 26771188, '+']
ENST00000324856	3645	3664	0.23155	['chr1', 26771194, '+']	['chr1', 26771213, '+']
ENST00000324856	3805	3865	0.31995	['chr1', 26772527, '+']	['chr1', 26772587, '+']
ENST00000324856	3906	3926	0.24258	['chr1', 26772628, '+']	['chr1', 26772827, '+']
ENST00000324856	3940	3976	0.25685	['chr1', 26772841, '+']	['chr1', 26772877, '+']
ENST00000324856	5313	5335	0.2395	['chr1', 26775169, '+']	['chr1', 26775191, '+']
ENST00000324856	5374	5395	0.24555	['chr1', 26775586, '+']	['chr1', 26775607, '+']
ENST00000324856	5409	5429	0.24538	['chr1', 26775621, '+']	['chr1', 26775641, '+']
ENST00000324856	7264	7314	0.2572	['chr1', 26780791, '+']	['chr1', 26780841, '+']
ENST00000324856	7350	7380	0.25735	['chr1', 26780877, '+']	['chr1', 26780907, '+']
ENST00000324856	7606	7634	0.2955	['chr1', 26781133, '+']	['chr1', 26781161, '+']
ENST00000324856	8248	8271	0.24345	['chr1', 26781775, '+']	['chr1', 26781798, '+']
ENST00000457599	295	314	0.23125	['chr1', 26696698, '+']	['chr1', 26696717, '+']
ENST00000457599	453	483	0.24305	['chr1', 26696856, '+']	['chr1', 26696886, '+']
ENST00000457599	504	529	0.26091	['chr1', 26696907, '+']	['chr1', 26696932, '+']
ENST00000457599	740	763	0.26046	['chr1', 26697143, '+']	['chr1', 26697166, '+']
ENST00000457599	1060	1082	0.27275	['chr1', 26697463, '+']	['chr1', 26697485, '+']
ENST00000457599	1467	1487	0.24395	['chr1', 26731268, '+']	['chr1', 26731288, '+']
ENST00000457599	1605	1630	0.24325	['chr1', 26731406, '+']	['chr1', 26731431, '+']
ENST00000457599	1735	1758	0.23815	['chr1', 26731536, '+']	['chr1', 26731559, '+']
ENST00000457599	1801	1827	0.2604	['chr1', 26731602, '+']	['chr1', 26732699, '+']
ENST00000457599	2288	2308	0.2402	['chr1', 26762188, '+']	['chr1', 26762208, '+']
ENST00000457599	2323	2346	0.24965	['chr1', 26762223, '+']	['chr1', 26762246, '+']
ENST00000457599	2459	2488	0.25465	['chr1', 26763012, '+']	['chr1', 26763041, '+']
ENST00000457599	2521	2565	0.26185	['chr1', 26763074, '+']	['chr1', 26763118, '+']
ENST00000457599	2673	2702	0.24645	['chr1', 26763226, '+']	['chr1', 26763255, '+']
ENST00000457599	2903	2941	0.29445	['chr1', 26766481, '+']	['chr1', 26766519, '+']
ENST00000457599	3245	3268	0.25005	['chr1', 26771165, '+']	['chr1', 26771188, '+']
ENST00000457599	3274	3293	0.23155	['chr1', 26771194, '+']	['chr1', 26771213, '+']
ENST00000457599	3434	3494	0.31995	['chr1', 26772527, '+']	['chr1', 26772587, '+']
ENST00000457599	3535	3555	0.24258	['chr1', 26772628, '+']	['chr1', 26772827, '+']
ENST00000457599	3569	3605	0.25685	['chr1', 26772841, '+']	['chr1', 26772877, '+']
ENST00000457599	4291	4313	0.2395	['chr1', 26775169, '+']	['chr1', 26775191, '+']
ENST00000457599	4352	4373	0.24555	['chr1', 26775586, '+']	['chr1', 26775607, '+']
ENST00000457599	4387	4407	0.24538	['chr1', 26775621, '+']	['chr1', 26775641, '+']
ENST00000524572	496	523	0.24921	['chr1', 26731268, '+']	['chr1', 26731295, '+']
ENST00000374152	1069	1089	0.24395	['chr1', 26731268, '+']	['chr1', 26731288, '+']
ENST00000374152	1207	1232	0.24325	['chr1', 26731406, '+']	['chr1', 26731431, '+']
ENST00000374152	1337	1360	0.23815	['chr1', 26731536, '+']	['chr1', 26731559, '+']
ENST00000374152	1403	1429	0.2604	['chr1', 26731602, '+']	['chr1', 26732699, '+']
ENST00000374152	1890	1910	0.2402	['chr1', 26762188, '+']	['chr1', 26762208, '+']
ENST00000374152	1925	1948	0.24965	['chr1', 26762223, '+']	['chr1', 26762246, '+']
ENST00000374152	2061	2090	0.25465	['chr1', 26763012, '+']	['chr1', 26763041, '+']
ENST00000374152	2123	2167	0.26185	['chr1', 26763074, '+']	['chr1', 26763118, '+']
ENST00000374152	2275	2304	0.24645	['chr1', 26763226, '+']	['chr1', 26763255, '+']
ENST00000374152	2505	2543	0.29445	['chr1', 26766481, '+']	['chr1', 26766519, '+']
ENST00000374152	2847	2870	0.25005	['chr1', 26771165, '+']	['chr1', 26771188, '+']
ENST00000374152	2876	2895	0.23155	['chr1', 26771194, '+']	['chr1', 26771213, '+']
ENST00000374152	3036	3096	0.31995	['chr1', 26772527, '+']	['chr1', 26772587, '+']
ENST00000374152	3137	3157	0.24258	['chr1', 26772628, '+']	['chr1', 26772827, '+']
ENST00000374152	3171	3207	0.25685	['chr1', 26772841, '+']	['chr1', 26772877, '+']
ENST00000374152	4544	4566	0.2395	['chr1', 26775169, '+']	['chr1', 26775191, '+']
ENST00000374152	4605	4626	0.24555	['chr1', 26775586, '+']	['chr1', 26775607, '+']
ENST00000374152	4640	4660	0.24538	['chr1', 26775621, '+']	['chr1', 26775641, '+']
ENST00000615191	601	621	0.24395	['chr1', 26731268, '+']	['chr1', 26731288, '+']
ENST00000615191	739	764	0.24325	['chr1', 26731406, '+']	['chr1', 26731431, '+']
ENST00000615191	869	892	0.23815	['chr1', 26731536, '+']	['chr1', 26731559, '+']
ENST00000615191	935	961	0.2604	['chr1', 26731602, '+']	['chr1', 26732699, '+']
ENST00000615191	1422	1442	0.2402	['chr1', 26762188, '+']	['chr1', 26762208, '+']
ENST00000615191	1457	1480	0.24965	['chr1', 26762223, '+']	['chr1', 26762246, '+']
ENST00000615191	1593	1622	0.25465	['chr1', 26763012, '+']	['chr1', 26763041, '+']
ENST00000615191	1655	1699	0.26185	['chr1', 26763074, '+']	['chr1', 26763118, '+']
ENST00000615191	1804	1833	0.24645	['chr1', 26763226, '+']	['chr1', 26763255, '+']
ENST00000615191	2034	2072	0.29445	['chr1', 26766481, '+']	['chr1', 26766519, '+']
ENST00000615191	2376	2399	0.25005	['chr1', 26771165, '+']	['chr1', 26771188, '+']
ENST00000615191	2405	2424	0.23155	['chr1', 26771194, '+']	['chr1', 26771213, '+']
ENST00000615191	2565	2625	0.31995	['chr1', 26772527, '+']	['chr1', 26772587, '+']
ENST00000615191	2666	2686	0.24258	['chr1', 26772628, '+']	['chr1', 26772827, '+']
ENST00000615191	2700	2736	0.25685	['chr1', 26772841, '+']	['chr1', 26772877, '+']
ENST00000636219	324	344	0.24395	['chr1', 26731268, '+']	['chr1', 26731288, '+']
ENST00000636219	462	487	0.24325	['chr1', 26731406, '+']	['chr1', 26731431, '+']
ENST00000636219	592	615	0.23815	['chr1', 26731536, '+']	['chr1', 26731559, '+']
ENST00000636219	658	684	0.2604	['chr1', 26731602, '+']	['chr1', 26732699, '+']
ENST00000636219	1145	1165	0.2402	['chr1', 26762188, '+']	['chr1', 26762208, '+']
ENST00000636219	1180	1203	0.24965	['chr1', 26762223, '+']	['chr1', 26762246, '+']
ENST00000636219	1316	1345	0.25465	['chr1', 26763012, '+']	['chr1', 26763041, '+']
ENST00000636219	1378	1422	0.26185	['chr1', 26763074, '+']	['chr1', 26763118, '+']
ENST00000636219	1530	1559	0.24645	['chr1', 26763226, '+']	['chr1', 26763255, '+']
ENST00000636219	1760	1798	0.29445	['chr1', 26766481, '+']	['chr1', 26766519, '+']
ENST00000636219	2102	2125	0.25005	['chr1', 26771165, '+']	['chr1', 26771188, '+']
ENST00000636219	2131	2150	0.23155	['chr1', 26771194, '+']	['chr1', 26771213, '+']
ENST00000636219	2291	2351	0.31995	['chr1', 26772527, '+']	['chr1', 26772587, '+']
ENST00000636219	2389	2409	0.24258	['chr1', 26772625, '+']	['chr1', 26772827, '+']
ENST00000636219	2423	2459	0.25685	['chr1', 26772841, '+']	['chr1', 26772877, '+']
ENST00000636219	3796	3818	0.2395	['chr1', 26775169, '+']	['chr1', 26775191, '+']
ENST00000636219	3857	3878	0.24555	['chr1', 26775586, '+']	['chr1', 26775607, '+']
ENST00000636219	3892	3912	0.24538	['chr1', 26775621, '+']	['chr1', 26775641, '+']
ENST00000636219	5747	5797	0.2572	['chr1', 26780791, '+']	['chr1', 26780841, '+']
ENST00000636219	5833	5863	0.25735	['chr1', 26780877, '+']	['chr1', 26780907, '+']
ENST00000636219	6089	6117	0.2955	['chr1', 26781133, '+']	['chr1', 26781161, '+']
ENST00000636219	6731	6754	0.24345	['chr1', 26781775, '+']	['chr1', 26781798, '+']
ENST00000636958	658	678	0.2402	['chr1', 26762188, '+']	['chr1', 26762208, '+']
ENST00000636958	693	716	0.24965	['chr1', 26762223, '+']	['chr1', 26762246, '+']
ENST00000636958	829	858	0.25465	['chr1', 26763012, '+']	['chr1', 26763041, '+']
ENST00000636958	891	935	0.26185	['chr1', 26763074, '+']	['chr1', 26763118, '+']
ENST00000636958	1043	1072	0.24645	['chr1', 26763226, '+']	['chr1', 26763255, '+']
ENST00000430291	212	250	0.29445	['chr1', 26766481, '+']	['chr1', 26766519, '+']
ENST00000466382	420	441	0.24555	['chr1', 26775586, '+']	['chr1', 26775607, '+']
ENST00000466382	455	475	0.24538	['chr1', 26775621, '+']	['chr1', 26775641, '+']
ENST00000466382	2310	2360	0.2572	['chr1', 26780791, '+']	['chr1', 26780841, '+']
ENST00000466382	2396	2426	0.25735	['chr1', 26780877, '+']	['chr1', 26780907, '+']
ENST00000466382	2651	2678	0.28817	['chr1', 26781132, '+']	['chr1', 26781159, '+']
ENST00000532781	300	322	0.2395	['chr1', 26775169, '+']	['chr1', 26775191, '+']
ENST00000532781	361	382	0.24555	['chr1', 26775586, '+']	['chr1', 26775607, '+']
ENST00000532781	396	416	0.24538	['chr1', 26775621, '+']	['chr1', 26775641, '+']
ENST00000532781	2391	2441	0.2572	['chr1', 26780791, '+']	['chr1', 26780841, '+']
ENST00000532781	2477	2507	0.25735	['chr1', 26780877, '+']	['chr1', 26780907, '+']
ENST00000637788	2693	2743	0.2572	['chr1', 26780791, '+']	['chr1', 26780841, '+']
ENST00000637788	2779	2809	0.25735	['chr1', 26780877, '+']	['chr1', 26780907, '+']
ENST00000374141	95	133	0.2483	['chr1', 26832491, '+']	['chr1', 26832529, '+']
ENST00000534643	98	136	0.2483	['chr1', 26832491, '+']	['chr1', 26832529, '+']
ENST00000531285	498	518	0.23345	['chr1', 27000032, '+']	['chr1', 27000052, '+']
ENST00000478104	2	21	0.23369	['chr1', 27322286, '+']	['chr1', 27322305, '+']
ENST00000398958	178	216	0.23625	['chr1', 28508832, '+']	['chr1', 28508870, '+']
ENST00000398958	220	241	0.2469	['chr1', 28508874, '+']	['chr1', 28508895, '+']
ENST00000398958	416	440	0.25245	['chr1', 28531885, '+']	['chr1', 28531909, '+']
ENST00000398958	595	648	0.3104	['chr1', 28532244, '+']	['chr1', 28532297, '+']
ENST00000398958	799	818	0.23393	['chr1', 28535258, '+']	['chr1', 28535277, '+']
ENST00000398958	832	919	0.33175	['chr1', 28535291, '+']	['chr1', 28535378, '+']
ENST00000398958	1004	1026	0.23315	['chr1', 28535953, '+']	['chr1', 28535975, '+']
ENST00000398958	1062	1083	0.24195	['chr1', 28536011, '+']	['chr1', 28536267, '+']
ENST00000398958	2318	2424	0.32212	['chr1', 28538799, '+']	['chr1', 28538905, '+']
ENST00000398958	2443	2463	0.24708	['chr1', 28538924, '+']	['chr1', 28538944, '+']
ENST00000427469	131	169	0.23625	['chr1', 28508832, '+']	['chr1', 28508870, '+']
ENST00000427469	173	194	0.2469	['chr1', 28508874, '+']	['chr1', 28508895, '+']
ENST00000427469	369	393	0.25245	['chr1', 28531885, '+']	['chr1', 28531909, '+']
ENST00000427469	548	601	0.3104	['chr1', 28532244, '+']	['chr1', 28532297, '+']
ENST00000427469	752	771	0.23393	['chr1', 28535258, '+']	['chr1', 28535277, '+']
ENST00000427469	785	872	0.33175	['chr1', 28535291, '+']	['chr1', 28535378, '+']
ENST00000434290	65	103	0.23625	['chr1', 28508832, '+']	['chr1', 28508870, '+']
ENST00000434290	107	128	0.2469	['chr1', 28508874, '+']	['chr1', 28508895, '+']
ENST00000434290	432	456	0.25245	['chr1', 28531885, '+']	['chr1', 28531909, '+']
ENST00000434290	611	664	0.3104	['chr1', 28532244, '+']	['chr1', 28532297, '+']
ENST00000434290	899	918	0.23393	['chr1', 28535258, '+']	['chr1', 28535277, '+']
ENST00000434290	932	1019	0.33175	['chr1', 28535291, '+']	['chr1', 28535378, '+']
ENST00000373833	64	102	0.23625	['chr1', 28508832, '+']	['chr1', 28508870, '+']
ENST00000373833	106	127	0.2469	['chr1', 28508874, '+']	['chr1', 28508895, '+']
ENST00000373833	441	465	0.25245	['chr1', 28531885, '+']	['chr1', 28531909, '+']
ENST00000373833	620	673	0.3104	['chr1', 28532244, '+']	['chr1', 28532297, '+']
ENST00000373833	824	843	0.23393	['chr1', 28535258, '+']	['chr1', 28535277, '+']
ENST00000373833	857	944	0.33175	['chr1', 28535291, '+']	['chr1', 28535378, '+']
ENST00000373833	1029	1051	0.23315	['chr1', 28535953, '+']	['chr1', 28535975, '+']
ENST00000373833	1087	1108	0.24195	['chr1', 28536011, '+']	['chr1', 28536267, '+']
ENST00000373833	2343	2449	0.32212	['chr1', 28538799, '+']	['chr1', 28538905, '+']
ENST00000373833	2468	2488	0.24708	['chr1', 28538924, '+']	['chr1', 28538944, '+']
ENST00000419074	336	360	0.25245	['chr1', 28531885, '+']	['chr1', 28531909, '+']
ENST00000419074	515	568	0.3104	['chr1', 28532244, '+']	['chr1', 28532297, '+']
ENST00000419074	719	738	0.23393	['chr1', 28535258, '+']	['chr1', 28535277, '+']
ENST00000419074	752	839	0.33175	['chr1', 28535291, '+']	['chr1', 28535378, '+']
ENST00000419074	924	946	0.23315	['chr1', 28535953, '+']	['chr1', 28535975, '+']
ENST00000373832	338	362	0.25245	['chr1', 28531885, '+']	['chr1', 28531909, '+']
ENST00000373832	517	570	0.3104	['chr1', 28532244, '+']	['chr1', 28532297, '+']
ENST00000373832	721	740	0.23393	['chr1', 28535258, '+']	['chr1', 28535277, '+']
ENST00000373832	754	841	0.33175	['chr1', 28535291, '+']	['chr1', 28535378, '+']
ENST00000373832	926	948	0.23315	['chr1', 28535953, '+']	['chr1', 28535975, '+']
ENST00000373832	984	1005	0.24195	['chr1', 28536011, '+']	['chr1', 28536267, '+']
ENST00000373832	2240	2346	0.32212	['chr1', 28538799, '+']	['chr1', 28538905, '+']
ENST00000373832	2365	2385	0.24708	['chr1', 28538924, '+']	['chr1', 28538944, '+']
ENST00000373831	310	334	0.25245	['chr1', 28531885, '+']	['chr1', 28531909, '+']
ENST00000373831	489	542	0.3104	['chr1', 28532244, '+']	['chr1', 28532297, '+']
ENST00000373831	693	712	0.23393	['chr1', 28535258, '+']	['chr1', 28535277, '+']
ENST00000373831	726	813	0.33175	['chr1', 28535291, '+']	['chr1', 28535378, '+']
ENST00000373831	898	920	0.23315	['chr1', 28535953, '+']	['chr1', 28535975, '+']
ENST00000373831	956	977	0.24195	['chr1', 28536011, '+']	['chr1', 28536267, '+']
ENST00000411533	259	283	0.25245	['chr1', 28531885, '+']	['chr1', 28531909, '+']
ENST00000411533	438	491	0.3104	['chr1', 28532244, '+']	['chr1', 28532297, '+']
ENST00000411533	642	661	0.23393	['chr1', 28535258, '+']	['chr1', 28535277, '+']
ENST00000411533	675	762	0.33175	['chr1', 28535291, '+']	['chr1', 28535378, '+']
ENST00000411533	847	869	0.23315	['chr1', 28535953, '+']	['chr1', 28535975, '+']
ENST00000411533	905	926	0.24195	['chr1', 28536011, '+']	['chr1', 28536267, '+']
ENST00000430407	428	452	0.25245	['chr1', 28531885, '+']	['chr1', 28531909, '+']
ENST00000430407	607	660	0.3104	['chr1', 28532244, '+']	['chr1', 28532297, '+']
ENST00000430407	811	830	0.23393	['chr1', 28535258, '+']	['chr1', 28535277, '+']
ENST00000430407	844	931	0.33175	['chr1', 28535291, '+']	['chr1', 28535378, '+']
ENST00000430407	1016	1038	0.23315	['chr1', 28535953, '+']	['chr1', 28535975, '+']
ENST00000429051	130	183	0.3104	['chr1', 28532244, '+']	['chr1', 28532297, '+']
ENST00000429051	334	353	0.23393	['chr1', 28535258, '+']	['chr1', 28535277, '+']
ENST00000429051	367	454	0.33175	['chr1', 28535291, '+']	['chr1', 28535378, '+']
ENST00000474884	232	255	0.24425	['chr1', 28737089, '+']	['chr1', 28737112, '+']
ENST00000474884	387	412	0.2755	['chr1', 28738330, '+']	['chr1', 28742419, '+']
ENST00000474884	530	551	0.2391	['chr1', 28742537, '+']	['chr1', 28742558, '+']
ENST00000474884	556	587	0.28825	['chr1', 28742563, '+']	['chr1', 28742594, '+']
ENST00000474884	654	690	0.32357	['chr1', 28742661, '+']	['chr1', 28742697, '+']
ENST00000542507	232	255	0.24425	['chr1', 28737089, '+']	['chr1', 28737112, '+']
ENST00000542507	387	412	0.2755	['chr1', 28738330, '+']	['chr1', 28742419, '+']
ENST00000542507	530	551	0.2391	['chr1', 28742537, '+']	['chr1', 28742558, '+']
ENST00000542507	556	587	0.28825	['chr1', 28742563, '+']	['chr1', 28742594, '+']
ENST00000542507	654	690	0.32357	['chr1', 28742661, '+']	['chr1', 28742697, '+']
ENST00000542507	1084	1113	0.284	['chr1', 28743091, '+']	['chr1', 28743120, '+']
ENST00000542507	1146	1168	0.2414	['chr1', 28743153, '+']	['chr1', 28743175, '+']
ENST00000542507	1395	1429	0.2934	['chr1', 28743402, '+']	['chr1', 28743436, '+']
ENST00000542507	1541	1572	0.41691	['chr1', 28743548, '+']	['chr1', 28743579, '+']
ENST00000542507	1612	1647	0.24245	['chr1', 28743619, '+']	['chr1', 28743654, '+']
ENST00000542507	1650	1676	0.27035	['chr1', 28743657, '+']	['chr1', 28743683, '+']
ENST00000542507	1740	1814	0.3236	['chr1', 28743747, '+']	['chr1', 28743821, '+']
ENST00000542507	1901	1941	0.27865	['chr1', 28743908, '+']	['chr1', 28743948, '+']
ENST00000542507	2643	2672	0.24805	['chr1', 28769592, '+']	['chr1', 28769621, '+']
ENST00000542507	2682	2715	0.27482	['chr1', 28769631, '+']	['chr1', 28769664, '+']
ENST00000373812	219	238	0.23305	['chr1', 28736977, '+']	['chr1', 28736996, '+']
ENST00000373812	331	354	0.24425	['chr1', 28737089, '+']	['chr1', 28737112, '+']
ENST00000373812	486	511	0.2755	['chr1', 28738330, '+']	['chr1', 28742419, '+']
ENST00000373812	629	650	0.2391	['chr1', 28742537, '+']	['chr1', 28742558, '+']
ENST00000373812	655	686	0.28825	['chr1', 28742563, '+']	['chr1', 28742594, '+']
ENST00000373812	753	789	0.32357	['chr1', 28742661, '+']	['chr1', 28742697, '+']
ENST00000373812	1183	1212	0.284	['chr1', 28743091, '+']	['chr1', 28743120, '+']
ENST00000373812	1245	1267	0.2414	['chr1', 28743153, '+']	['chr1', 28743175, '+']
ENST00000373812	1494	1528	0.2934	['chr1', 28743402, '+']	['chr1', 28743436, '+']
ENST00000373812	1640	1671	0.41691	['chr1', 28743548, '+']	['chr1', 28743579, '+']
ENST00000373812	1711	1746	0.24245	['chr1', 28743619, '+']	['chr1', 28743654, '+']
ENST00000373812	1749	1775	0.27035	['chr1', 28743657, '+']	['chr1', 28743683, '+']
ENST00000373812	1839	1913	0.3236	['chr1', 28743747, '+']	['chr1', 28743821, '+']
ENST00000373812	2000	2040	0.27865	['chr1', 28743908, '+']	['chr1', 28743948, '+']
ENST00000373812	2742	2771	0.24805	['chr1', 28769592, '+']	['chr1', 28769621, '+']
ENST00000373812	2781	2814	0.27482	['chr1', 28769631, '+']	['chr1', 28769664, '+']
ENST00000541996	38	57	0.23305	['chr1', 28736977, '+']	['chr1', 28736996, '+']
ENST00000541996	150	173	0.24425	['chr1', 28737089, '+']	['chr1', 28737112, '+']
ENST00000541996	280	305	0.2755	['chr1', 28738330, '+']	['chr1', 28742419, '+']
ENST00000541996	423	444	0.2391	['chr1', 28742537, '+']	['chr1', 28742558, '+']
ENST00000541996	449	480	0.28825	['chr1', 28742563, '+']	['chr1', 28742594, '+']
ENST00000541996	547	583	0.32357	['chr1', 28742661, '+']	['chr1', 28742697, '+']
ENST00000541996	977	1006	0.284	['chr1', 28743091, '+']	['chr1', 28743120, '+']
ENST00000541996	1039	1061	0.2414	['chr1', 28743153, '+']	['chr1', 28743175, '+']
ENST00000541996	1288	1322	0.2934	['chr1', 28743402, '+']	['chr1', 28743436, '+']
ENST00000541996	1434	1465	0.41691	['chr1', 28743548, '+']	['chr1', 28743579, '+']
ENST00000541996	1505	1540	0.24245	['chr1', 28743619, '+']	['chr1', 28743654, '+']
ENST00000541996	1543	1569	0.27035	['chr1', 28743657, '+']	['chr1', 28743683, '+']
ENST00000541996	1633	1707	0.3236	['chr1', 28743747, '+']	['chr1', 28743821, '+']
ENST00000541996	1794	1834	0.27865	['chr1', 28743908, '+']	['chr1', 28743948, '+']
ENST00000541996	2536	2565	0.24805	['chr1', 28769592, '+']	['chr1', 28769621, '+']
ENST00000541996	2575	2608	0.27482	['chr1', 28769631, '+']	['chr1', 28769664, '+']
ENST00000478283	28	47	0.23305	['chr1', 28736977, '+']	['chr1', 28736996, '+']
ENST00000478283	140	163	0.24425	['chr1', 28737089, '+']	['chr1', 28737112, '+']
ENST00000478283	805	830	0.2755	['chr1', 28738330, '+']	['chr1', 28742419, '+']
ENST00000478283	948	969	0.2391	['chr1', 28742537, '+']	['chr1', 28742558, '+']
ENST00000478283	974	1005	0.28825	['chr1', 28742563, '+']	['chr1', 28742594, '+']
ENST00000478283	1072	1108	0.32357	['chr1', 28742661, '+']	['chr1', 28742697, '+']
ENST00000478283	1502	1531	0.284	['chr1', 28743091, '+']	['chr1', 28743120, '+']
ENST00000478283	1564	1586	0.2414	['chr1', 28743153, '+']	['chr1', 28743175, '+']
ENST00000478283	1813	1847	0.2934	['chr1', 28743402, '+']	['chr1', 28743436, '+']
ENST00000478283	1959	1990	0.41691	['chr1', 28743548, '+']	['chr1', 28743579, '+']
ENST00000478283	2030	2065	0.24245	['chr1', 28743619, '+']	['chr1', 28743654, '+']
ENST00000478283	2068	2094	0.27035	['chr1', 28743657, '+']	['chr1', 28743683, '+']
ENST00000478283	2158	2232	0.3236	['chr1', 28743747, '+']	['chr1', 28743821, '+']
ENST00000478283	2319	2359	0.27865	['chr1', 28743908, '+']	['chr1', 28743948, '+']
ENST00000496288	1	32	0.23447	['chr1', 28736965, '+']	['chr1', 28736996, '+']
ENST00000496288	125	148	0.24425	['chr1', 28737089, '+']	['chr1', 28737112, '+']
ENST00000496288	271	296	0.2755	['chr1', 28738321, '+']	['chr1', 28742419, '+']
ENST00000496288	414	435	0.2391	['chr1', 28742537, '+']	['chr1', 28742558, '+']
ENST00000496288	440	471	0.28825	['chr1', 28742563, '+']	['chr1', 28742594, '+']
ENST00000496288	538	574	0.32357	['chr1', 28742661, '+']	['chr1', 28742697, '+']
ENST00000475796	120	145	0.2755	['chr1', 28738330, '+']	['chr1', 28742419, '+']
ENST00000475796	263	284	0.2391	['chr1', 28742537, '+']	['chr1', 28742558, '+']
ENST00000475796	289	320	0.28825	['chr1', 28742563, '+']	['chr1', 28742594, '+']
ENST00000476976	152	177	0.2755	['chr1', 28738330, '+']	['chr1', 28742419, '+']
ENST00000476976	295	316	0.2391	['chr1', 28742537, '+']	['chr1', 28742558, '+']
ENST00000476976	321	352	0.28825	['chr1', 28742563, '+']	['chr1', 28742594, '+']
ENST00000476976	419	455	0.32357	['chr1', 28742661, '+']	['chr1', 28742697, '+']
ENST00000373710	1640	1660	0.23515	['chr1', 31434171, '+']	['chr1', 31434191, '+']
ENST00000373710	2091	2118	0.25875	['chr1', 31434622, '+']	['chr1', 31434649, '+']
ENST00000536859	1563	1583	0.23515	['chr1', 31434171, '+']	['chr1', 31434191, '+']
ENST00000536859	2014	2051	0.25875	['chr1', 31434622, '+']	['chr1', 31434659, '+']
ENST00000373709	1490	1510	0.23515	['chr1', 31434171, '+']	['chr1', 31434191, '+']
ENST00000373709	1941	1972	0.25875	['chr1', 31434622, '+']	['chr1', 31434653, '+']
ENST00000491976	2301	2321	0.23515	['chr1', 31434171, '+']	['chr1', 31434191, '+']
ENST00000491976	2752	2779	0.25875	['chr1', 31434622, '+']	['chr1', 31434649, '+']
ENST00000536384	1553	1573	0.23515	['chr1', 31434171, '+']	['chr1', 31434191, '+']
ENST00000536384	2004	2041	0.25875	['chr1', 31434622, '+']	['chr1', 31434659, '+']
ENST00000327300	31	52	0.25127	['chr1', 32013859, '+']	['chr1', 32013880, '+']
ENST00000327300	225	247	0.24055	['chr1', 32014053, '+']	['chr1', 32014075, '+']
ENST00000327300	552	599	0.30882	['chr1', 32030300, '+']	['chr1', 32030347, '+']
ENST00000327300	1249	1268	0.23935	['chr1', 32038011, '+']	['chr1', 32038030, '+']
ENST00000307714	128	150	0.24055	['chr1', 32014053, '+']	['chr1', 32014075, '+']
ENST00000307714	455	502	0.30882	['chr1', 32030300, '+']	['chr1', 32030347, '+']
ENST00000307714	1152	1171	0.23935	['chr1', 32038011, '+']	['chr1', 32038030, '+']
ENST00000492989	58	80	0.24055	['chr1', 32014053, '+']	['chr1', 32014075, '+']
ENST00000492989	385	432	0.30882	['chr1', 32030300, '+']	['chr1', 32030347, '+']
ENST00000492989	965	984	0.23935	['chr1', 32038011, '+']	['chr1', 32038030, '+']
ENST00000484270	199	246	0.30882	['chr1', 32030300, '+']	['chr1', 32030347, '+']
ENST00000484270	896	915	0.23935	['chr1', 32038011, '+']	['chr1', 32038030, '+']
ENST00000487305	610	634	0.2515	['chr1', 32075663, '+']	['chr1', 32075687, '+']
ENST00000487305	868	923	0.31833	['chr1', 32077178, '+']	['chr1', 32077233, '+']
ENST00000487305	1004	1023	0.2318	['chr1', 32077314, '+']	['chr1', 32091689, '+']
ENST00000487305	1209	1233	0.24	['chr1', 32091875, '+']	['chr1', 32091899, '+']
ENST00000487305	1249	1322	0.2959	['chr1', 32091915, '+']	['chr1', 32091988, '+']
ENST00000487305	1519	1539	0.2418	['chr1', 32094957, '+']	['chr1', 32100447, '+']
ENST00000487305	1781	1806	0.2376	['chr1', 32102557, '+']	['chr1', 32102582, '+']
ENST00000336294	338	362	0.2515	['chr1', 32075663, '+']	['chr1', 32075687, '+']
ENST00000336294	596	651	0.31833	['chr1', 32077178, '+']	['chr1', 32077233, '+']
ENST00000336294	732	751	0.2318	['chr1', 32077314, '+']	['chr1', 32091689, '+']
ENST00000336294	937	961	0.24	['chr1', 32091875, '+']	['chr1', 32091899, '+']
ENST00000336294	977	1050	0.2959	['chr1', 32091915, '+']	['chr1', 32091988, '+']
ENST00000336294	1247	1267	0.2418	['chr1', 32094957, '+']	['chr1', 32100447, '+']
ENST00000336294	1509	1534	0.2376	['chr1', 32102557, '+']	['chr1', 32102582, '+']
ENST00000438825	305	329	0.2515	['chr1', 32075663, '+']	['chr1', 32075687, '+']
ENST00000438825	479	534	0.31833	['chr1', 32077178, '+']	['chr1', 32077233, '+']
ENST00000438825	615	634	0.2318	['chr1', 32077314, '+']	['chr1', 32091689, '+']
ENST00000441402	297	321	0.2515	['chr1', 32075663, '+']	['chr1', 32075687, '+']
ENST00000441402	452	471	0.2318	['chr1', 32075818, '+']	['chr1', 32091689, '+']
ENST00000441402	657	681	0.24	['chr1', 32091875, '+']	['chr1', 32091899, '+']
ENST00000441402	697	770	0.2959	['chr1', 32091915, '+']	['chr1', 32091988, '+']
ENST00000441402	967	987	0.2418	['chr1', 32094957, '+']	['chr1', 32100447, '+']
ENST00000441402	1229	1254	0.2376	['chr1', 32102557, '+']	['chr1', 32102582, '+']
ENST00000472503	217	241	0.2437	['chr1', 32075074, '+']	['chr1', 32075687, '+']
ENST00000472503	475	530	0.31833	['chr1', 32077178, '+']	['chr1', 32077233, '+']
ENST00000472503	611	630	0.2318	['chr1', 32077314, '+']	['chr1', 32091689, '+']
ENST00000472503	816	840	0.24	['chr1', 32091875, '+']	['chr1', 32091899, '+']
ENST00000472503	856	914	0.2959	['chr1', 32091915, '+']	['chr1', 32091973, '+']
ENST00000468135	271	295	0.2515	['chr1', 32075663, '+']	['chr1', 32075687, '+']
ENST00000468135	612	667	0.31833	['chr1', 32077178, '+']	['chr1', 32077233, '+']
ENST00000468135	748	767	0.2318	['chr1', 32077314, '+']	['chr1', 32091689, '+']
ENST00000468135	953	977	0.24	['chr1', 32091875, '+']	['chr1', 32091899, '+']
ENST00000468135	993	1066	0.2959	['chr1', 32091915, '+']	['chr1', 32091988, '+']
ENST00000468135	1263	1283	0.2418	['chr1', 32094957, '+']	['chr1', 32100447, '+']
ENST00000468135	1525	1550	0.2376	['chr1', 32102557, '+']	['chr1', 32102582, '+']
ENST00000466321	302	326	0.2515	['chr1', 32075663, '+']	['chr1', 32075687, '+']
ENST00000466321	560	615	0.31833	['chr1', 32077178, '+']	['chr1', 32077233, '+']
ENST00000466321	696	715	0.2318	['chr1', 32077314, '+']	['chr1', 32091689, '+']
ENST00000476968	411	435	0.2515	['chr1', 32075663, '+']	['chr1', 32075687, '+']
ENST00000476968	669	724	0.31833	['chr1', 32077178, '+']	['chr1', 32077233, '+']
ENST00000476968	805	824	0.2318	['chr1', 32077314, '+']	['chr1', 32091689, '+']
ENST00000476968	1010	1034	0.24	['chr1', 32091875, '+']	['chr1', 32091899, '+']
ENST00000476968	1050	1123	0.2959	['chr1', 32091915, '+']	['chr1', 32091988, '+']
ENST00000476968	1685	1710	0.2376	['chr1', 32102557, '+']	['chr1', 32102582, '+']
ENST00000498613	223	278	0.31833	['chr1', 32077178, '+']	['chr1', 32077233, '+']
ENST00000498613	359	378	0.2318	['chr1', 32077314, '+']	['chr1', 32091689, '+']
ENST00000498613	564	588	0.24	['chr1', 32091875, '+']	['chr1', 32091899, '+']
ENST00000498613	604	677	0.2959	['chr1', 32091915, '+']	['chr1', 32091988, '+']
ENST00000373625	1353	1373	0.25455	['chr1', 32169897, '+']	['chr1', 32169917, '+']
ENST00000373625	1518	1561	0.23794	['chr1', 32170708, '+']	['chr1', 32170751, '+']
ENST00000373625	1728	1747	0.2308	['chr1', 32170918, '+']	['chr1', 32170937, '+']
ENST00000373625	1934	1989	0.3471	['chr1', 32171124, '+']	['chr1', 32171179, '+']
ENST00000373625	2300	2334	0.25538	['chr1', 32171490, '+']	['chr1', 32171524, '+']
ENST00000373625	2463	2485	0.28036	['chr1', 32171653, '+']	['chr1', 32171675, '+']
ENST00000373625	2527	2548	0.24746	['chr1', 32171717, '+']	['chr1', 32171738, '+']
ENST00000373625	2733	2754	0.25582	['chr1', 32171923, '+']	['chr1', 32171944, '+']
ENST00000373625	3010	3031	0.23435	['chr1', 32172200, '+']	['chr1', 32172221, '+']
ENST00000373625	3092	3139	0.3371	['chr1', 32172282, '+']	['chr1', 32172329, '+']
ENST00000373625	3194	3250	0.36085	['chr1', 32172384, '+']	['chr1', 32172440, '+']
ENST00000373625	3522	3558	0.31375	['chr1', 32172712, '+']	['chr1', 32172748, '+']
ENST00000373625	3693	3731	0.28877	['chr1', 32172883, '+']	['chr1', 32172921, '+']
ENST00000373625	3874	3894	0.24005	['chr1', 32173064, '+']	['chr1', 32173084, '+']
ENST00000373625	3951	3987	0.29346	['chr1', 32173141, '+']	['chr1', 32173177, '+']
ENST00000373625	4101	4179	0.31005	['chr1', 32173291, '+']	['chr1', 32173369, '+']
ENST00000373625	4285	4320	0.27235	['chr1', 32173475, '+']	['chr1', 32173510, '+']
ENST00000373625	4344	4367	0.2467	['chr1', 32173534, '+']	['chr1', 32173557, '+']
ENST00000373625	4374	4415	0.2903	['chr1', 32173564, '+']	['chr1', 32173605, '+']
ENST00000373625	4896	4929	0.26495	['chr1', 32174086, '+']	['chr1', 32174119, '+']
ENST00000373625	5277	5321	0.2726	['chr1', 32174467, '+']	['chr1', 32174511, '+']
ENST00000373625	5337	5360	0.25375	['chr1', 32174527, '+']	['chr1', 32174550, '+']
ENST00000373625	5418	5461	0.28695	['chr1', 32174608, '+']	['chr1', 32174651, '+']
ENST00000373625	5568	5603	0.2541	['chr1', 32174758, '+']	['chr1', 32174793, '+']
ENST00000373625	5850	5888	0.25555	['chr1', 32175040, '+']	['chr1', 32175078, '+']
ENST00000373625	5892	5927	0.24495	['chr1', 32175082, '+']	['chr1', 32175117, '+']
ENST00000373625	6032	6057	0.2614	['chr1', 32175222, '+']	['chr1', 32175247, '+']
ENST00000373625	6078	6105	0.25247	['chr1', 32175268, '+']	['chr1', 32175295, '+']
ENST00000373625	6231	6250	0.2311	['chr1', 32175421, '+']	['chr1', 32175440, '+']
ENST00000373625	6285	6305	0.2459	['chr1', 32175475, '+']	['chr1', 32175495, '+']
ENST00000373625	7192	7246	0.3019	['chr1', 32176382, '+']	['chr1', 32176436, '+']
ENST00000515055	186	205	0.2308	['chr1', 32170918, '+']	['chr1', 32170937, '+']
ENST00000515055	392	447	0.3471	['chr1', 32171124, '+']	['chr1', 32171179, '+']
ENST00000515055	481	535	0.3019	['chr1', 32176382, '+']	['chr1', 32176436, '+']
ENST00000373610	92	143	0.3056	['chr1', 32180314, '+']	['chr1', 32180365, '+']
ENST00000373610	236	265	0.26515	['chr1', 32180458, '+']	['chr1', 32180487, '+']
ENST00000373610	319	346	0.29109	['chr1', 32181268, '+']	['chr1', 32181295, '+']
ENST00000373610	359	392	0.2598	['chr1', 32181308, '+']	['chr1', 32181341, '+']
ENST00000373610	436	473	0.29465	['chr1', 32181385, '+']	['chr1', 32181422, '+']
ENST00000373610	587	613	0.24805	['chr1', 32181536, '+']	['chr1', 32181562, '+']
ENST00000373610	744	798	0.32175	['chr1', 32187977, '+']	['chr1', 32188031, '+']
ENST00000373610	955	990	0.27685	['chr1', 32190118, '+']	['chr1', 32190153, '+']
ENST00000373610	1019	1069	0.2484	['chr1', 32190182, '+']	['chr1', 32190232, '+']
ENST00000373610	1822	1841	0.24682	['chr1', 32195253, '+']	['chr1', 32195272, '+']
ENST00000373610	1952	1975	0.253	['chr1', 32195383, '+']	['chr1', 32195406, '+']
ENST00000373610	2000	2020	0.2368	['chr1', 32195431, '+']	['chr1', 32195451, '+']
ENST00000373610	2088	2132	0.29935	['chr1', 32195519, '+']	['chr1', 32195563, '+']
ENST00000373610	2164	2185	0.25665	['chr1', 32195595, '+']	['chr1', 32195616, '+']
ENST00000373610	2198	2217	0.24382	['chr1', 32195629, '+']	['chr1', 32195648, '+']
ENST00000373610	2344	2377	0.30605	['chr1', 32195775, '+']	['chr1', 32195808, '+']
ENST00000373610	2406	2425	0.234	['chr1', 32195837, '+']	['chr1', 32195856, '+']
ENST00000373610	2748	2767	0.23275	['chr1', 32196179, '+']	['chr1', 32196198, '+']
ENST00000373610	2826	2846	0.2385	['chr1', 32196257, '+']	['chr1', 32196277, '+']
ENST00000373610	2866	2885	0.2319	['chr1', 32196297, '+']	['chr1', 32196316, '+']
ENST00000373610	3030	3050	0.24587	['chr1', 32196461, '+']	['chr1', 32196481, '+']
ENST00000373610	3288	3312	0.2638	['chr1', 32196719, '+']	['chr1', 32196743, '+']
ENST00000373610	3576	3595	0.2347	['chr1', 32197007, '+']	['chr1', 32197026, '+']
ENST00000373610	4213	4245	0.2591	['chr1', 32197644, '+']	['chr1', 32197676, '+']
ENST00000373610	4391	4420	0.31282	['chr1', 32197822, '+']	['chr1', 32197851, '+']
ENST00000373610	4442	4495	0.28055	['chr1', 32197873, '+']	['chr1', 32197926, '+']
ENST00000373609	250	301	0.3056	['chr1', 32180314, '+']	['chr1', 32180365, '+']
ENST00000373609	394	423	0.26515	['chr1', 32180458, '+']	['chr1', 32180487, '+']
ENST00000373609	477	504	0.29109	['chr1', 32181268, '+']	['chr1', 32181295, '+']
ENST00000373609	517	550	0.2598	['chr1', 32181308, '+']	['chr1', 32181341, '+']
ENST00000373609	594	631	0.29465	['chr1', 32181385, '+']	['chr1', 32181422, '+']
ENST00000373609	745	771	0.24805	['chr1', 32181536, '+']	['chr1', 32181562, '+']
ENST00000373609	902	956	0.32175	['chr1', 32187977, '+']	['chr1', 32188031, '+']
ENST00000373609	1113	1148	0.27685	['chr1', 32190118, '+']	['chr1', 32190153, '+']
ENST00000373609	1177	1227	0.2484	['chr1', 32190182, '+']	['chr1', 32190232, '+']
ENST00000373609	1980	1999	0.24682	['chr1', 32195253, '+']	['chr1', 32195272, '+']
ENST00000373609	2110	2133	0.253	['chr1', 32195383, '+']	['chr1', 32195406, '+']
ENST00000373609	2158	2178	0.2368	['chr1', 32195431, '+']	['chr1', 32195451, '+']
ENST00000373609	2246	2290	0.29935	['chr1', 32195519, '+']	['chr1', 32195563, '+']
ENST00000373609	2322	2343	0.25665	['chr1', 32195595, '+']	['chr1', 32195616, '+']
ENST00000373609	2356	2375	0.24382	['chr1', 32195629, '+']	['chr1', 32195648, '+']
ENST00000373609	2502	2535	0.30605	['chr1', 32195775, '+']	['chr1', 32195808, '+']
ENST00000373609	2564	2583	0.234	['chr1', 32195837, '+']	['chr1', 32195856, '+']
ENST00000373609	2906	2925	0.23275	['chr1', 32196179, '+']	['chr1', 32196198, '+']
ENST00000373609	2984	3004	0.2385	['chr1', 32196257, '+']	['chr1', 32196277, '+']
ENST00000373609	3024	3043	0.2319	['chr1', 32196297, '+']	['chr1', 32196316, '+']
ENST00000373609	3188	3208	0.24587	['chr1', 32196461, '+']	['chr1', 32196481, '+']
ENST00000373609	3446	3470	0.2638	['chr1', 32196719, '+']	['chr1', 32196743, '+']
ENST00000373609	3734	3753	0.2347	['chr1', 32197007, '+']	['chr1', 32197026, '+']
ENST00000373609	4371	4403	0.2591	['chr1', 32197644, '+']	['chr1', 32197676, '+']
ENST00000373609	4549	4578	0.31282	['chr1', 32197822, '+']	['chr1', 32197851, '+']
ENST00000373609	4600	4653	0.28055	['chr1', 32197873, '+']	['chr1', 32197926, '+']
ENST00000461819	97	129	0.25559	['chr1', 32201943, '+']	['chr1', 32201975, '+']
ENST00000461819	137	209	0.3298	['chr1', 32201983, '+']	['chr1', 32202055, '+']
ENST00000461819	290	321	0.26531	['chr1', 32203915, '+']	['chr1', 32203946, '+']
ENST00000461819	691	722	0.2386	['chr1', 32205294, '+']	['chr1', 32205325, '+']
ENST00000373548	125	161	0.34265	['chr1', 32292210, '+']	['chr1', 32302648, '+']
ENST00000373548	254	315	0.2918	['chr1', 32316672, '+']	['chr1', 32316733, '+']
ENST00000373548	659	709	0.2758	['chr1', 32327616, '+']	['chr1', 32327666, '+']
ENST00000373548	813	843	0.25771	['chr1', 32329160, '+']	['chr1', 32330607, '+']
ENST00000373548	866	922	0.2672	['chr1', 32330630, '+']	['chr1', 32330686, '+']
ENST00000373548	986	1016	0.24645	['chr1', 32330831, '+']	['chr1', 32330861, '+']
ENST00000373548	1038	1075	0.26472	['chr1', 32330883, '+']	['chr1', 32331485, '+']
ENST00000373548	1936	1955	0.23465	['chr1', 32333447, '+']	['chr1', 32333466, '+']
ENST00000373548	2033	2074	0.2602	['chr1', 32333544, '+']	['chr1', 32333585, '+']
ENST00000481281	76	112	0.34265	['chr1', 32292210, '+']	['chr1', 32302648, '+']
ENST00000481281	205	266	0.2918	['chr1', 32316672, '+']	['chr1', 32316733, '+']
ENST00000481281	663	699	0.25945	['chr1', 32327616, '+']	['chr1', 32327652, '+']
ENST00000463172	74	110	0.34265	['chr1', 32292210, '+']	['chr1', 32302648, '+']
ENST00000463172	203	264	0.2918	['chr1', 32316672, '+']	['chr1', 32316733, '+']
ENST00000428704	71	107	0.34265	['chr1', 32292210, '+']	['chr1', 32302648, '+']
ENST00000428704	200	261	0.2918	['chr1', 32316672, '+']	['chr1', 32316733, '+']
ENST00000428704	530	580	0.2758	['chr1', 32327616, '+']	['chr1', 32327666, '+']
ENST00000472928	66	127	0.2918	['chr1', 32316672, '+']	['chr1', 32316733, '+']
ENST00000472928	471	511	0.26458	['chr1', 32327616, '+']	['chr1', 32327656, '+']
ENST00000490081	428	478	0.2758	['chr1', 32327616, '+']	['chr1', 32327666, '+']
ENST00000490081	582	612	0.25771	['chr1', 32329160, '+']	['chr1', 32330607, '+']
ENST00000490081	635	691	0.2672	['chr1', 32330630, '+']	['chr1', 32330686, '+']
ENST00000490081	755	785	0.24645	['chr1', 32330831, '+']	['chr1', 32330861, '+']
ENST00000490081	807	844	0.26472	['chr1', 32330883, '+']	['chr1', 32331485, '+']
ENST00000482310	266	316	0.2758	['chr1', 32327616, '+']	['chr1', 32327666, '+']
ENST00000482310	420	450	0.25771	['chr1', 32329160, '+']	['chr1', 32330607, '+']
ENST00000482310	473	529	0.2672	['chr1', 32330630, '+']	['chr1', 32330686, '+']
ENST00000482310	593	623	0.24645	['chr1', 32330831, '+']	['chr1', 32330861, '+']
ENST00000482310	645	682	0.26472	['chr1', 32330883, '+']	['chr1', 32331485, '+']
ENST00000482310	736	758	0.23445	['chr1', 32331539, '+']	['chr1', 32331561, '+']
ENST00000476391	1098	1128	0.25771	['chr1', 32330577, '+']	['chr1', 32330607, '+']
ENST00000476391	1151	1207	0.2672	['chr1', 32330630, '+']	['chr1', 32330686, '+']
ENST00000476391	1271	1301	0.24645	['chr1', 32330831, '+']	['chr1', 32330861, '+']
ENST00000476391	1323	1360	0.26472	['chr1', 32330883, '+']	['chr1', 32331485, '+']
ENST00000476391	2221	2240	0.23465	['chr1', 32333447, '+']	['chr1', 32333466, '+']
ENST00000476391	2318	2359	0.2602	['chr1', 32333544, '+']	['chr1', 32333585, '+']
ENST00000414241	190	262	0.2865	['chr1', 32651925, '+']	['chr1', 32651997, '+']
ENST00000414241	408	442	0.24785	['chr1', 32657508, '+']	['chr1', 32657542, '+']
ENST00000414241	619	645	0.34158	['chr1', 32668371, '+']	['chr1', 32668397, '+']
ENST00000414241	830	871	0.30887	['chr1', 32669039, '+']	['chr1', 32669080, '+']
ENST00000414241	884	934	0.32305	['chr1', 32669093, '+']	['chr1', 32669241, '+']
ENST00000414241	1412	1433	0.2472	['chr1', 32679677, '+']	['chr1', 32679698, '+']
ENST00000414241	1460	1501	0.28933	['chr1', 32679725, '+']	['chr1', 32679766, '+']
ENST00000527118	157	229	0.2865	['chr1', 32651925, '+']	['chr1', 32651997, '+']
ENST00000527118	440	466	0.34158	['chr1', 32668371, '+']	['chr1', 32668397, '+']
ENST00000527118	651	679	0.29421	['chr1', 32669039, '+']	['chr1', 32669067, '+']
ENST00000401893	125	197	0.2865	['chr1', 32651925, '+']	['chr1', 32651997, '+']
ENST00000401893	343	377	0.24785	['chr1', 32657508, '+']	['chr1', 32657542, '+']
ENST00000401893	554	580	0.34158	['chr1', 32668371, '+']	['chr1', 32668397, '+']
ENST00000524393	121	193	0.2865	['chr1', 32651925, '+']	['chr1', 32651997, '+']
ENST00000524393	309	335	0.34158	['chr1', 32668371, '+']	['chr1', 32668397, '+']
ENST00000524393	520	561	0.30887	['chr1', 32669039, '+']	['chr1', 32669080, '+']
ENST00000526193	118	190	0.2865	['chr1', 32651925, '+']	['chr1', 32651997, '+']
ENST00000526193	438	479	0.30887	['chr1', 32669039, '+']	['chr1', 32669080, '+']
ENST00000526193	492	542	0.32305	['chr1', 32669093, '+']	['chr1', 32669241, '+']
ENST00000492348	118	190	0.2865	['chr1', 32651925, '+']	['chr1', 32651997, '+']
ENST00000492348	438	479	0.30887	['chr1', 32669039, '+']	['chr1', 32669080, '+']
ENST00000492348	492	542	0.32305	['chr1', 32669093, '+']	['chr1', 32669241, '+']
ENST00000492348	1020	1041	0.2472	['chr1', 32679677, '+']	['chr1', 32679698, '+']
ENST00000492348	1068	1109	0.28933	['chr1', 32679725, '+']	['chr1', 32679766, '+']
ENST00000492348	1460	1522	0.32435	['chr1', 32680117, '+']	['chr1', 32680179, '+']
ENST00000525506	117	189	0.2865	['chr1', 32651925, '+']	['chr1', 32651997, '+']
ENST00000525506	335	369	0.24785	['chr1', 32657508, '+']	['chr1', 32657542, '+']
ENST00000373485	101	173	0.2865	['chr1', 32651925, '+']	['chr1', 32651997, '+']
ENST00000373485	319	353	0.24785	['chr1', 32657508, '+']	['chr1', 32657542, '+']
ENST00000373485	530	556	0.34158	['chr1', 32668371, '+']	['chr1', 32668397, '+']
ENST00000373485	741	782	0.30887	['chr1', 32669039, '+']	['chr1', 32669080, '+']
ENST00000373485	795	845	0.32305	['chr1', 32669093, '+']	['chr1', 32669241, '+']
ENST00000373485	1279	1300	0.25323	['chr1', 32672895, '+']	['chr1', 32680540, '+']
ENST00000373485	1304	1342	0.329	['chr1', 32680544, '+']	['chr1', 32680582, '+']
ENST00000477563	57	129	0.2865	['chr1', 32651925, '+']	['chr1', 32651997, '+']
ENST00000477563	275	309	0.24785	['chr1', 32657508, '+']	['chr1', 32657542, '+']
ENST00000458695	89	161	0.2865	['chr1', 32651925, '+']	['chr1', 32651997, '+']
ENST00000458695	307	341	0.24785	['chr1', 32657508, '+']	['chr1', 32657542, '+']
ENST00000458695	518	544	0.34158	['chr1', 32668371, '+']	['chr1', 32668397, '+']
ENST00000458695	729	770	0.30887	['chr1', 32669039, '+']	['chr1', 32669080, '+']
ENST00000458695	783	833	0.32305	['chr1', 32669093, '+']	['chr1', 32669241, '+']
ENST00000458695	1311	1332	0.2472	['chr1', 32679677, '+']	['chr1', 32679698, '+']
ENST00000458695	1359	1400	0.28933	['chr1', 32679725, '+']	['chr1', 32679766, '+']
ENST00000475321	53	116	0.34158	['chr1', 32668371, '+']	['chr1', 32669080, '+']
ENST00000475321	129	179	0.32305	['chr1', 32669093, '+']	['chr1', 32669241, '+']
ENST00000463378	1	51	0.32305	['chr1', 32669093, '+']	['chr1', 32669241, '+']
ENST00000463378	651	672	0.2472	['chr1', 32679677, '+']	['chr1', 32679698, '+']
ENST00000463378	699	740	0.28933	['chr1', 32679725, '+']	['chr1', 32679766, '+']
ENST00000460669	1	37	0.30887	['chr1', 32669107, '+']	['chr1', 32669241, '+']
ENST00000460669	515	536	0.2472	['chr1', 32679677, '+']	['chr1', 32679698, '+']
ENST00000460669	563	604	0.28933	['chr1', 32679725, '+']	['chr1', 32679766, '+']
ENST00000460669	674	712	0.329	['chr1', 32680544, '+']	['chr1', 32680582, '+']
ENST00000482190	469	506	0.26555	['chr1', 32679677, '+']	['chr1', 32680541, '+']
ENST00000482190	509	547	0.329	['chr1', 32680544, '+']	['chr1', 32680582, '+']
ENST00000294521	609	629	0.24	['chr1', 32772928, '+']	['chr1', 32772948, '+']
ENST00000294521	812	834	0.25515	['chr1', 32773131, '+']	['chr1', 32773153, '+']
ENST00000483388	190	214	0.30791	['chr1', 33276363, '+']	['chr1', 33276387, '+']
ENST00000483388	392	411	0.2366	['chr1', 33276565, '+']	['chr1', 33276584, '+']
ENST00000539719	288	312	0.30791	['chr1', 33276363, '+']	['chr1', 33276387, '+']
ENST00000539719	490	509	0.2366	['chr1', 33276565, '+']	['chr1', 33276584, '+']
ENST00000539719	901	920	0.2374	['chr1', 33281634, '+']	['chr1', 33281653, '+']
ENST00000539719	937	956	0.23365	['chr1', 33281670, '+']	['chr1', 33281689, '+']
ENST00000539719	1007	1043	0.30175	['chr1', 33281740, '+']	['chr1', 33281776, '+']
ENST00000539719	1184	1205	0.2601	['chr1', 33295173, '+']	['chr1', 33295194, '+']
ENST00000539719	1333	1352	0.2331	['chr1', 33298946, '+']	['chr1', 33298965, '+']
ENST00000539719	1539	1562	0.2385	['chr1', 33299152, '+']	['chr1', 33299175, '+']
ENST00000539719	1648	1675	0.2824	['chr1', 33299261, '+']	['chr1', 33299288, '+']
ENST00000539719	1827	1877	0.30465	['chr1', 33299440, '+']	['chr1', 33299490, '+']
ENST00000539719	1906	1941	0.2754	['chr1', 33299519, '+']	['chr1', 33299554, '+']
ENST00000539719	2072	2092	0.26691	['chr1', 33299685, '+']	['chr1', 33299705, '+']
ENST00000539719	2171	2202	0.2998	['chr1', 33299784, '+']	['chr1', 33299815, '+']
ENST00000539719	2319	2338	0.241	['chr1', 33299932, '+']	['chr1', 33299951, '+']
ENST00000539719	2385	2418	0.2667	['chr1', 33299998, '+']	['chr1', 33300031, '+']
ENST00000539719	2498	2521	0.2418	['chr1', 33300111, '+']	['chr1', 33300134, '+']
ENST00000539719	2646	2665	0.24318	['chr1', 33300259, '+']	['chr1', 33300278, '+']
ENST00000539719	2776	2811	0.2876	['chr1', 33300389, '+']	['chr1', 33300424, '+']
ENST00000373428	118	142	0.30791	['chr1', 33276363, '+']	['chr1', 33276387, '+']
ENST00000373428	320	339	0.2366	['chr1', 33276565, '+']	['chr1', 33276584, '+']
ENST00000373428	731	750	0.2374	['chr1', 33281634, '+']	['chr1', 33281653, '+']
ENST00000373428	767	786	0.23365	['chr1', 33281670, '+']	['chr1', 33281689, '+']
ENST00000373428	837	873	0.30175	['chr1', 33281740, '+']	['chr1', 33281776, '+']
ENST00000373428	1014	1035	0.2601	['chr1', 33295173, '+']	['chr1', 33295194, '+']
ENST00000373428	1163	1182	0.2331	['chr1', 33298946, '+']	['chr1', 33298965, '+']
ENST00000373428	1369	1392	0.2385	['chr1', 33299152, '+']	['chr1', 33299175, '+']
ENST00000373428	1478	1505	0.2824	['chr1', 33299261, '+']	['chr1', 33299288, '+']
ENST00000373428	1657	1707	0.30465	['chr1', 33299440, '+']	['chr1', 33299490, '+']
ENST00000373428	1736	1771	0.2754	['chr1', 33299519, '+']	['chr1', 33299554, '+']
ENST00000373428	1902	1922	0.26691	['chr1', 33299685, '+']	['chr1', 33299705, '+']
ENST00000373428	2001	2032	0.2998	['chr1', 33299784, '+']	['chr1', 33299815, '+']
ENST00000373428	2149	2168	0.241	['chr1', 33299932, '+']	['chr1', 33299951, '+']
ENST00000373428	2215	2248	0.2667	['chr1', 33299998, '+']	['chr1', 33300031, '+']
ENST00000373428	2328	2351	0.2418	['chr1', 33300111, '+']	['chr1', 33300134, '+']
ENST00000373428	2476	2495	0.24318	['chr1', 33300259, '+']	['chr1', 33300278, '+']
ENST00000373428	2606	2641	0.2876	['chr1', 33300389, '+']	['chr1', 33300424, '+']
ENST00000477934	156	175	0.2374	['chr1', 33281634, '+']	['chr1', 33281653, '+']
ENST00000477934	192	211	0.23365	['chr1', 33281670, '+']	['chr1', 33281689, '+']
ENST00000477934	262	298	0.30175	['chr1', 33281740, '+']	['chr1', 33281776, '+']
ENST00000373253	357	413	0.3013	['chr1', 35557829, '+']	['chr1', 35559108, '+']
ENST00000373253	423	442	0.2351	['chr1', 35559118, '+']	['chr1', 35559137, '+']
ENST00000373253	577	598	0.24895	['chr1', 35560350, '+']	['chr1', 35560371, '+']
ENST00000373253	994	1020	0.27385	['chr1', 35560767, '+']	['chr1', 35560793, '+']
ENST00000373253	1402	1429	0.2493	['chr1', 35561175, '+']	['chr1', 35561202, '+']
ENST00000373253	1432	1457	0.2523	['chr1', 35561205, '+']	['chr1', 35561230, '+']
ENST00000373253	2005	2050	0.26945	['chr1', 35563783, '+']	['chr1', 35563828, '+']
ENST00000373253	2141	2167	0.23455	['chr1', 35565236, '+']	['chr1', 35565262, '+']
ENST00000373253	2178	2198	0.23565	['chr1', 35565273, '+']	['chr1', 35565293, '+']
ENST00000373253	2262	2291	0.24065	['chr1', 35565357, '+']	['chr1', 35565386, '+']
ENST00000373253	2354	2387	0.27095	['chr1', 35565449, '+']	['chr1', 35565482, '+']
ENST00000373253	2390	2425	0.2507	['chr1', 35565485, '+']	['chr1', 35565520, '+']
ENST00000373253	2784	2805	0.23835	['chr1', 35565879, '+']	['chr1', 35565900, '+']
ENST00000356090	38	136	0.3013	['chr1', 35557829, '+']	['chr1', 35558199, '+']
ENST00000356090	139	161	0.2366	['chr1', 35558202, '+']	['chr1', 35559107, '+']
ENST00000356090	172	191	0.2351	['chr1', 35559118, '+']	['chr1', 35559137, '+']
ENST00000356090	326	347	0.24895	['chr1', 35560350, '+']	['chr1', 35560371, '+']
ENST00000356090	743	769	0.27385	['chr1', 35560767, '+']	['chr1', 35560793, '+']
ENST00000356090	1151	1178	0.2493	['chr1', 35561175, '+']	['chr1', 35561202, '+']
ENST00000356090	1181	1206	0.2523	['chr1', 35561205, '+']	['chr1', 35561230, '+']
ENST00000356090	1754	1799	0.26945	['chr1', 35563783, '+']	['chr1', 35563828, '+']
ENST00000356090	1890	1916	0.23455	['chr1', 35565236, '+']	['chr1', 35565262, '+']
ENST00000356090	1927	1947	0.23565	['chr1', 35565273, '+']	['chr1', 35565293, '+']
ENST00000356090	2011	2040	0.24065	['chr1', 35565357, '+']	['chr1', 35565386, '+']
ENST00000356090	2103	2136	0.27095	['chr1', 35565449, '+']	['chr1', 35565482, '+']
ENST00000356090	2139	2174	0.2507	['chr1', 35565485, '+']	['chr1', 35565520, '+']
ENST00000356090	2533	2554	0.23835	['chr1', 35565879, '+']	['chr1', 35565900, '+']
ENST00000373243	22	78	0.3013	['chr1', 35557829, '+']	['chr1', 35557885, '+']
ENST00000373243	133	167	0.31071	['chr1', 35557940, '+']	['chr1', 35557974, '+']
ENST00000373243	340	392	0.2898	['chr1', 35558147, '+']	['chr1', 35558199, '+']
ENST00000373243	395	417	0.2366	['chr1', 35558202, '+']	['chr1', 35559107, '+']
ENST00000373243	428	447	0.2351	['chr1', 35559118, '+']	['chr1', 35559137, '+']
ENST00000373243	582	603	0.24895	['chr1', 35560350, '+']	['chr1', 35560371, '+']
ENST00000373243	999	1025	0.27385	['chr1', 35560767, '+']	['chr1', 35560793, '+']
ENST00000373243	1407	1434	0.2493	['chr1', 35561175, '+']	['chr1', 35561202, '+']
ENST00000373243	1437	1462	0.2523	['chr1', 35561205, '+']	['chr1', 35561230, '+']
ENST00000373243	2010	2055	0.26945	['chr1', 35563783, '+']	['chr1', 35563828, '+']
ENST00000373243	2146	2172	0.23455	['chr1', 35565236, '+']	['chr1', 35565262, '+']
ENST00000373243	2183	2203	0.23565	['chr1', 35565273, '+']	['chr1', 35565293, '+']
ENST00000373243	2267	2296	0.24065	['chr1', 35565357, '+']	['chr1', 35565386, '+']
ENST00000373243	2359	2392	0.27095	['chr1', 35565449, '+']	['chr1', 35565482, '+']
ENST00000373243	2395	2430	0.2507	['chr1', 35565485, '+']	['chr1', 35565520, '+']
ENST00000373243	2789	2810	0.23835	['chr1', 35565879, '+']	['chr1', 35565900, '+']
ENST00000459931	1	97	0.31026	['chr1', 35557831, '+']	['chr1', 35558199, '+']
ENST00000459931	100	127	0.24927	['chr1', 35558202, '+']	['chr1', 35558229, '+']
ENST00000459931	394	413	0.2351	['chr1', 35559118, '+']	['chr1', 35559137, '+']
ENST00000459931	548	569	0.24895	['chr1', 35560350, '+']	['chr1', 35560371, '+']
ENST00000459931	965	991	0.27385	['chr1', 35560767, '+']	['chr1', 35560793, '+']
ENST00000437806	192	211	0.2351	['chr1', 35559118, '+']	['chr1', 35559137, '+']
ENST00000437806	346	367	0.24895	['chr1', 35560350, '+']	['chr1', 35560371, '+']
[truncated: 80,719 more rows]

## Sheet: HEK293FT_vs_HAP1
transcript_id	start_coordinate	stop_coordinate	L1_distance	genomeCoor_start	genomeCoor_end
ENST00000338591	652	696	0.34315	['chr1', 961881, '+']	['chr1', 961925, '+']
ENST00000338591	772	919	0.3225	['chr1', 962001, '+']	['chr1', 962455, '+']
ENST00000338591	922	948	0.2814	['chr1', 962458, '+']	['chr1', 962716, '+']
ENST00000338591	956	977	0.23565	['chr1', 962724, '+']	['chr1', 962745, '+']
ENST00000338591	1230	1285	0.27562	['chr1', 963189, '+']	['chr1', 963244, '+']
ENST00000338591	1744	1764	0.2373	['chr1', 964467, '+']	['chr1', 964487, '+']
ENST00000338591	1833	1854	0.23375	['chr1', 964988, '+']	['chr1', 965009, '+']
ENST00000622660	332	435	0.3225	['chr1', 962352, '+']	['chr1', 962455, '+']
ENST00000622660	438	464	0.2814	['chr1', 962458, '+']	['chr1', 962716, '+']
ENST00000622660	472	493	0.23565	['chr1', 962724, '+']	['chr1', 962745, '+']
ENST00000622660	746	801	0.27562	['chr1', 963189, '+']	['chr1', 963244, '+']
ENST00000622660	1247	1267	0.2373	['chr1', 964467, '+']	['chr1', 964487, '+']
ENST00000622660	1336	1357	0.23375	['chr1', 964988, '+']	['chr1', 965009, '+']
ENST00000463212	172	194	0.26318	['chr1', 961620, '+']	['chr1', 961642, '+']
ENST00000463212	358	402	0.34315	['chr1', 961881, '+']	['chr1', 961925, '+']
ENST00000463212	478	524	0.2392	['chr1', 962001, '+']	['chr1', 962047, '+']
ENST00000463212	829	934	0.3225	['chr1', 962352, '+']	['chr1', 962457, '+']
ENST00000466300	229	254	0.23942	['chr1', 963069, '+']	['chr1', 963094, '+']
ENST00000466300	349	404	0.27562	['chr1', 963189, '+']	['chr1', 963244, '+']
ENST00000466300	850	870	0.2373	['chr1', 964467, '+']	['chr1', 964487, '+']
ENST00000481067	52	93	0.25275	['chr1', 963603, '+']	['chr1', 963644, '+']
ENST00000379389	158	189	0.34142	['chr1', 1013987, '+']	['chr1', 1014018, '+']
ENST00000379389	275	320	0.26525	['chr1', 1014104, '+']	['chr1', 1014149, '+']
ENST00000379389	614	634	0.23235	['chr1', 1014443, '+']	['chr1', 1014463, '+']
ENST00000379370	787	817	0.2492	['chr1', 1041182, '+']	['chr1', 1041212, '+']
ENST00000379370	824	844	0.2404	['chr1', 1041219, '+']	['chr1', 1041239, '+']
ENST00000379370	1065	1086	0.2404	['chr1', 1041540, '+']	['chr1', 1041561, '+']
ENST00000379370	1138	1171	0.249	['chr1', 1041613, '+']	['chr1', 1041646, '+']
ENST00000379370	1228	1276	0.28565	['chr1', 1041956, '+']	['chr1', 1042004, '+']
ENST00000379370	1353	1373	0.26055	['chr1', 1042081, '+']	['chr1', 1042101, '+']
ENST00000379370	1481	1500	0.23265	['chr1', 1043285, '+']	['chr1', 1043304, '+']
ENST00000379370	1707	1727	0.2463	['chr1', 1043591, '+']	['chr1', 1043611, '+']
ENST00000379370	1766	1798	0.25615	['chr1', 1043650, '+']	['chr1', 1043682, '+']
ENST00000379370	1834	1888	0.3119	['chr1', 1043718, '+']	['chr1', 1043862, '+']
ENST00000379370	2000	2049	0.2539	['chr1', 1043974, '+']	['chr1', 1044023, '+']
ENST00000379370	2163	2193	0.25585	['chr1', 1044222, '+']	['chr1', 1044252, '+']
ENST00000379370	2324	2350	0.28925	['chr1', 1045180, '+']	['chr1', 1045206, '+']
ENST00000379370	2540	2561	0.2339	['chr1', 1045477, '+']	['chr1', 1045498, '+']
ENST00000379370	2747	2801	0.2554	['chr1', 1045980, '+']	['chr1', 1046034, '+']
ENST00000379370	2861	2891	0.25945	['chr1', 1046165, '+']	['chr1', 1046195, '+']
ENST00000379370	2988	3039	0.27865	['chr1', 1046423, '+']	['chr1', 1046474, '+']
ENST00000379370	3178	3222	0.26828	['chr1', 1046613, '+']	['chr1', 1046657, '+']
ENST00000379370	3234	3263	0.25445	['chr1', 1046669, '+']	['chr1', 1046698, '+']
ENST00000379370	3265	3295	0.2446	['chr1', 1046700, '+']	['chr1', 1046730, '+']
ENST00000379370	3306	3339	0.2461	['chr1', 1046825, '+']	['chr1', 1046858, '+']
ENST00000379370	3365	3384	0.233	['chr1', 1046884, '+']	['chr1', 1046903, '+']
ENST00000379370	3431	3466	0.27746	['chr1', 1046950, '+']	['chr1', 1047354, '+']
ENST00000379370	3551	3574	0.25367	['chr1', 1047439, '+']	['chr1', 1047580, '+']
ENST00000379370	3861	3897	0.2618	['chr1', 1048071, '+']	['chr1', 1048107, '+']
ENST00000379370	4050	4071	0.2422	['chr1', 1048260, '+']	['chr1', 1048281, '+']
ENST00000379370	4748	4775	0.25285	['chr1', 1049749, '+']	['chr1', 1049776, '+']
ENST00000379370	4899	4928	0.26355	['chr1', 1050007, '+']	['chr1', 1050036, '+']
ENST00000379370	5001	5025	0.27425	['chr1', 1050304, '+']	['chr1', 1050328, '+']
ENST00000379370	5031	5059	0.2802	['chr1', 1050431, '+']	['chr1', 1050459, '+']
ENST00000379370	5103	5130	0.25355	['chr1', 1050503, '+']	['chr1', 1050530, '+']
ENST00000379370	5161	5184	0.2437	['chr1', 1050561, '+']	['chr1', 1050584, '+']
ENST00000379370	5381	5400	0.23575	['chr1', 1051330, '+']	['chr1', 1051349, '+']
ENST00000379370	5598	5624	0.27333	['chr1', 1051630, '+']	['chr1', 1051738, '+']
ENST00000379370	5904	5937	0.23613	['chr1', 1053955, '+']	['chr1', 1054458, '+']
ENST00000379370	6138	6167	0.2364	['chr1', 1054931, '+']	['chr1', 1054960, '+']
ENST00000620552	787	817	0.2492	['chr1', 1041182, '+']	['chr1', 1041212, '+']
ENST00000620552	824	844	0.2404	['chr1', 1041219, '+']	['chr1', 1041239, '+']
ENST00000620552	1065	1086	0.2404	['chr1', 1041540, '+']	['chr1', 1041561, '+']
ENST00000620552	1138	1171	0.249	['chr1', 1041613, '+']	['chr1', 1041646, '+']
ENST00000620552	1228	1276	0.28565	['chr1', 1041956, '+']	['chr1', 1042004, '+']
ENST00000620552	1353	1373	0.26055	['chr1', 1042081, '+']	['chr1', 1042101, '+']
ENST00000620552	1481	1500	0.23265	['chr1', 1043285, '+']	['chr1', 1043304, '+']
ENST00000620552	1707	1727	0.2463	['chr1', 1043591, '+']	['chr1', 1043611, '+']
ENST00000620552	1766	1798	0.25615	['chr1', 1043650, '+']	['chr1', 1043682, '+']
ENST00000620552	1834	1888	0.3119	['chr1', 1043718, '+']	['chr1', 1043862, '+']
ENST00000620552	2000	2049	0.2539	['chr1', 1043974, '+']	['chr1', 1044023, '+']
ENST00000620552	2163	2193	0.25585	['chr1', 1044222, '+']	['chr1', 1044252, '+']
ENST00000620552	2324	2350	0.28925	['chr1', 1045180, '+']	['chr1', 1045206, '+']
ENST00000620552	2540	2561	0.2339	['chr1', 1045477, '+']	['chr1', 1045498, '+']
ENST00000620552	2747	2801	0.2554	['chr1', 1045980, '+']	['chr1', 1046034, '+']
ENST00000620552	2861	2891	0.25945	['chr1', 1046165, '+']	['chr1', 1046195, '+']
ENST00000620552	2988	3039	0.27865	['chr1', 1046423, '+']	['chr1', 1046474, '+']
ENST00000620552	3178	3222	0.26828	['chr1', 1046613, '+']	['chr1', 1046657, '+']
ENST00000620552	3234	3263	0.25445	['chr1', 1046669, '+']	['chr1', 1046698, '+']
ENST00000620552	3265	3295	0.2446	['chr1', 1046700, '+']	['chr1', 1046730, '+']
ENST00000620552	3306	3339	0.2461	['chr1', 1046825, '+']	['chr1', 1046858, '+']
ENST00000620552	3365	3384	0.233	['chr1', 1046884, '+']	['chr1', 1046903, '+']
ENST00000620552	3431	3466	0.27746	['chr1', 1046950, '+']	['chr1', 1047354, '+']
ENST00000620552	3551	3574	0.25367	['chr1', 1047439, '+']	['chr1', 1047580, '+']
ENST00000620552	3861	3897	0.2618	['chr1', 1048071, '+']	['chr1', 1048107, '+']
ENST00000620552	4050	4071	0.2422	['chr1', 1048260, '+']	['chr1', 1048281, '+']
ENST00000620552	4748	4775	0.25285	['chr1', 1049749, '+']	['chr1', 1049776, '+']
ENST00000620552	4899	4928	0.26355	['chr1', 1050007, '+']	['chr1', 1050036, '+']
ENST00000620552	5001	5025	0.27425	['chr1', 1050304, '+']	['chr1', 1050328, '+']
ENST00000620552	5031	5059	0.2802	['chr1', 1050431, '+']	['chr1', 1050459, '+']
ENST00000620552	5103	5130	0.25355	['chr1', 1050503, '+']	['chr1', 1050530, '+']
ENST00000620552	5161	5184	0.2437	['chr1', 1050561, '+']	['chr1', 1050584, '+']
ENST00000620552	5393	5412	0.23575	['chr1', 1051330, '+']	['chr1', 1051349, '+']
ENST00000620552	5610	5636	0.27333	['chr1', 1051630, '+']	['chr1', 1051738, '+']
ENST00000620552	5973	6006	0.23613	['chr1', 1053955, '+']	['chr1', 1054458, '+']
ENST00000620552	6207	6236	0.2364	['chr1', 1054931, '+']	['chr1', 1054960, '+']
ENST00000469403	684	714	0.2492	['chr1', 1041182, '+']	['chr1', 1041212, '+']
ENST00000469403	721	741	0.2404	['chr1', 1041219, '+']	['chr1', 1041239, '+']
ENST00000479707	79	100	0.2339	['chr1', 1045477, '+']	['chr1', 1045498, '+']
ENST00000479707	286	340	0.2554	['chr1', 1045980, '+']	['chr1', 1046034, '+']
ENST00000479707	400	430	0.25945	['chr1', 1046165, '+']	['chr1', 1046195, '+']
ENST00000466223	123	154	0.28309	['chr1', 1047323, '+']	['chr1', 1047354, '+']
ENST00000466223	239	262	0.25367	['chr1', 1047439, '+']	['chr1', 1047580, '+']
ENST00000419249	54	77	0.2437	['chr1', 1050561, '+']	['chr1', 1050584, '+']
ENST00000419249	286	305	0.23575	['chr1', 1051330, '+']	['chr1', 1051349, '+']
ENST00000419249	503	529	0.27333	['chr1', 1051630, '+']	['chr1', 1051738, '+']
ENST00000461111	1970	2003	0.23613	['chr1', 1053955, '+']	['chr1', 1054458, '+']
ENST00000461111	2204	2233	0.2364	['chr1', 1054931, '+']	['chr1', 1054960, '+']
ENST00000379198	276	312	0.26085	['chr1', 1232540, '+']	['chr1', 1232576, '+']
ENST00000379198	347	369	0.25415	['chr1', 1232611, '+']	['chr1', 1232633, '+']
ENST00000379198	1139	1165	0.26255	['chr1', 1233403, '+']	['chr1', 1233429, '+']
ENST00000379198	1346	1365	0.2322	['chr1', 1233610, '+']	['chr1', 1233629, '+']
ENST00000379198	2068	2118	0.2893	['chr1', 1234332, '+']	['chr1', 1234382, '+']
ENST00000379198	2323	2347	0.24255	['chr1', 1234587, '+']	['chr1', 1234611, '+']
ENST00000379198	2476	2519	0.3075	['chr1', 1234740, '+']	['chr1', 1234783, '+']
ENST00000379198	2570	2594	0.25245	['chr1', 1234834, '+']	['chr1', 1234858, '+']
ENST00000379198	2663	2682	0.23195	['chr1', 1234927, '+']	['chr1', 1234946, '+']
ENST00000379031	109	145	0.31185	['chr1', 1308675, '+']	['chr1', 1308711, '+']
ENST00000470520	65	101	0.31185	['chr1', 1308675, '+']	['chr1', 1308711, '+']
ENST00000464957	262	291	0.25008	['chr1', 1325017, '+']	['chr1', 1325046, '+']
ENST00000464957	343	362	0.23594	['chr1', 1325098, '+']	['chr1', 1327255, '+']
ENST00000343938	251	280	0.25008	['chr1', 1325017, '+']	['chr1', 1325046, '+']
ENST00000343938	453	487	0.266	['chr1', 1326952, '+']	['chr1', 1326986, '+']
ENST00000343938	495	514	0.23115	['chr1', 1326994, '+']	['chr1', 1327013, '+']
ENST00000343938	529	551	0.25554	['chr1', 1327028, '+']	['chr1', 1327258, '+']
ENST00000343938	1295	1317	0.24605	['chr1', 1328002, '+']	['chr1', 1328024, '+']
ENST00000448629	232	264	0.31655	['chr1', 1400221, '+']	['chr1', 1400253, '+']
ENST00000448629	273	324	0.27475	['chr1', 1400262, '+']	['chr1', 1400614, '+']
ENST00000448629	337	359	0.2488	['chr1', 1400627, '+']	['chr1', 1400649, '+']
ENST00000448629	534	560	0.26155	['chr1', 1400824, '+']	['chr1', 1400850, '+']
ENST00000448629	596	617	0.24005	['chr1', 1400886, '+']	['chr1', 1400907, '+']
ENST00000448629	703	735	0.248	['chr1', 1400993, '+']	['chr1', 1401025, '+']
ENST00000444362	223	255	0.31655	['chr1', 1400221, '+']	['chr1', 1400253, '+']
ENST00000444362	264	315	0.27475	['chr1', 1400262, '+']	['chr1', 1400614, '+']
ENST00000444362	328	350	0.2488	['chr1', 1400627, '+']	['chr1', 1400649, '+']
ENST00000444362	525	551	0.26155	['chr1', 1400824, '+']	['chr1', 1400850, '+']
ENST00000444362	587	608	0.24005	['chr1', 1400886, '+']	['chr1', 1400907, '+']
ENST00000444362	694	726	0.248	['chr1', 1400993, '+']	['chr1', 1401025, '+']
ENST00000444362	1010	1092	0.35753	['chr1', 1401309, '+']	['chr1', 1401391, '+']
ENST00000444362	1380	1413	0.2478	['chr1', 1401679, '+']	['chr1', 1401712, '+']
ENST00000418833	692	724	0.31655	['chr1', 1400221, '+']	['chr1', 1400253, '+']
ENST00000418833	733	784	0.27475	['chr1', 1400262, '+']	['chr1', 1400614, '+']
ENST00000418833	797	819	0.2488	['chr1', 1400627, '+']	['chr1', 1400649, '+']
ENST00000418833	994	1020	0.26155	['chr1', 1400824, '+']	['chr1', 1400850, '+']
ENST00000418833	1056	1077	0.24005	['chr1', 1400886, '+']	['chr1', 1400907, '+']
ENST00000418833	1163	1195	0.248	['chr1', 1400993, '+']	['chr1', 1401025, '+']
ENST00000418833	1479	1561	0.35753	['chr1', 1401309, '+']	['chr1', 1401391, '+']
ENST00000418833	1849	1882	0.2478	['chr1', 1401679, '+']	['chr1', 1401712, '+']
ENST00000447725	359	391	0.31655	['chr1', 1400221, '+']	['chr1', 1400253, '+']
ENST00000447725	400	451	0.27475	['chr1', 1400262, '+']	['chr1', 1400614, '+']
ENST00000447725	464	486	0.2488	['chr1', 1400627, '+']	['chr1', 1400649, '+']
ENST00000447725	661	687	0.26155	['chr1', 1400824, '+']	['chr1', 1400850, '+']
ENST00000447725	723	744	0.24005	['chr1', 1400886, '+']	['chr1', 1400907, '+']
ENST00000447725	830	862	0.248	['chr1', 1400993, '+']	['chr1', 1401025, '+']
ENST00000447725	1146	1228	0.35753	['chr1', 1401309, '+']	['chr1', 1401391, '+']
ENST00000447725	1516	1549	0.2478	['chr1', 1401679, '+']	['chr1', 1401712, '+']
ENST00000572242	416	448	0.31655	['chr1', 1400221, '+']	['chr1', 1400253, '+']
ENST00000572242	457	503	0.27475	['chr1', 1400262, '+']	['chr1', 1400308, '+']
ENST00000572242	822	844	0.2488	['chr1', 1400627, '+']	['chr1', 1400649, '+']
ENST00000572242	1019	1045	0.26155	['chr1', 1400824, '+']	['chr1', 1400850, '+']
ENST00000572242	1081	1102	0.24005	['chr1', 1400886, '+']	['chr1', 1400907, '+']
ENST00000572242	1188	1220	0.248	['chr1', 1400993, '+']	['chr1', 1401025, '+']
ENST00000572242	1504	1586	0.35753	['chr1', 1401309, '+']	['chr1', 1401391, '+']
ENST00000572242	1874	1907	0.2478	['chr1', 1401679, '+']	['chr1', 1401712, '+']
ENST00000453521	121	203	0.35753	['chr1', 1401309, '+']	['chr1', 1401391, '+']
ENST00000453521	491	524	0.2478	['chr1', 1401679, '+']	['chr1', 1401712, '+']
ENST00000338660	184	206	0.2574	['chr1', 1435706, '+']	['chr1', 1435728, '+']
ENST00000338660	479	506	0.2827	['chr1', 1439097, '+']	['chr1', 1439124, '+']
ENST00000338660	714	737	0.26192	['chr1', 1439332, '+']	['chr1', 1439355, '+']
ENST00000338660	845	868	0.26358	['chr1', 1439463, '+']	['chr1', 1439486, '+']
ENST00000338660	1023	1053	0.23575	['chr1', 1439641, '+']	['chr1', 1439671, '+']
ENST00000476993	36	58	0.2574	['chr1', 1435706, '+']	['chr1', 1435728, '+']
ENST00000476993	371	392	0.2527	['chr1', 1437146, '+']	['chr1', 1437167, '+']
ENST00000476993	726	753	0.2827	['chr1', 1439097, '+']	['chr1', 1439124, '+']
ENST00000476993	961	984	0.26192	['chr1', 1439332, '+']	['chr1', 1439355, '+']
ENST00000476993	1092	1115	0.26358	['chr1', 1439463, '+']	['chr1', 1439486, '+']
ENST00000476993	1270	1300	0.23575	['chr1', 1439641, '+']	['chr1', 1439671, '+']
ENST00000495558	506	527	0.2527	['chr1', 1437146, '+']	['chr1', 1437167, '+']
ENST00000308647	109	135	0.26315	['chr1', 1471877, '+']	['chr1', 1471903, '+']
ENST00000308647	1689	1726	0.26785	['chr1', 1490630, '+']	['chr1', 1490667, '+']
ENST00000308647	2102	2144	0.32935	['chr1', 1495856, '+']	['chr1', 1495898, '+']
ENST00000472194	237	301	0.3524	['chr1', 1478262, '+']	['chr1', 1478326, '+']
ENST00000472194	1909	1946	0.26785	['chr1', 1490630, '+']	['chr1', 1490667, '+']
ENST00000472194	2322	2364	0.32935	['chr1', 1495856, '+']	['chr1', 1495898, '+']
ENST00000485748	2474	2511	0.26785	['chr1', 1490630, '+']	['chr1', 1490667, '+']
ENST00000485748	2887	2929	0.32935	['chr1', 1495856, '+']	['chr1', 1495898, '+']
ENST00000474481	2609	2646	0.26785	['chr1', 1490630, '+']	['chr1', 1490667, '+']
ENST00000474481	3022	3064	0.32935	['chr1', 1495856, '+']	['chr1', 1495898, '+']
ENST00000378756	194	228	0.2765	['chr1', 1512344, '+']	['chr1', 1512378, '+']
ENST00000378756	977	997	0.24475	['chr1', 1522852, '+']	['chr1', 1522872, '+']
ENST00000378756	1943	1969	0.35191	['chr1', 1534136, '+']	['chr1', 1534162, '+']
ENST00000378755	170	204	0.2765	['chr1', 1512344, '+']	['chr1', 1512378, '+']
ENST00000378755	1097	1117	0.24475	['chr1', 1522852, '+']	['chr1', 1522872, '+']
ENST00000378755	2063	2089	0.35191	['chr1', 1534136, '+']	['chr1', 1534162, '+']
ENST00000339113	815	835	0.24475	['chr1', 1522852, '+']	['chr1', 1522872, '+']
ENST00000339113	1781	1807	0.35191	['chr1', 1534136, '+']	['chr1', 1534162, '+']
ENST00000536055	815	835	0.24475	['chr1', 1522852, '+']	['chr1', 1522872, '+']
ENST00000536055	1781	1807	0.35191	['chr1', 1534136, '+']	['chr1', 1534162, '+']
ENST00000514234	1346	1384	0.28527	['chr1', 1628064, '+']	['chr1', 1628102, '+']
ENST00000514234	1497	1519	0.2563	['chr1', 1628308, '+']	['chr1', 1628330, '+']
ENST00000514234	1552	1590	0.27325	['chr1', 1628363, '+']	['chr1', 1628490, '+']
ENST00000514234	1635	1663	0.2596	['chr1', 1628535, '+']	['chr1', 1628563, '+']
ENST00000514234	1690	1719	0.26625	['chr1', 1628590, '+']	['chr1', 1628619, '+']
ENST00000514234	1955	1997	0.24255	['chr1', 1629265, '+']	['chr1', 1629307, '+']
ENST00000514234	2057	2079	0.25233	['chr1', 1629440, '+']	['chr1', 1629462, '+']
ENST00000514234	2290	2318	0.25515	['chr1', 1630332, '+']	['chr1', 1630360, '+']
ENST00000483015	47	75	0.2596	['chr1', 1628535, '+']	['chr1', 1628563, '+']
ENST00000483015	102	131	0.26625	['chr1', 1628590, '+']	['chr1', 1628619, '+']
ENST00000483015	466	508	0.24255	['chr1', 1629265, '+']	['chr1', 1629307, '+']
ENST00000483015	568	590	0.25233	['chr1', 1629440, '+']	['chr1', 1629462, '+']
ENST00000483015	801	829	0.25515	['chr1', 1630332, '+']	['chr1', 1630360, '+']
ENST00000511910	160	202	0.24255	['chr1', 1629265, '+']	['chr1', 1629307, '+']
ENST00000511910	313	341	0.25515	['chr1', 1630332, '+']	['chr1', 1630360, '+']
ENST00000470373	273	301	0.25515	['chr1', 1630332, '+']	['chr1', 1630360, '+']
ENST00000378567	38	60	0.27182	['chr1', 2050507, '+']	['chr1', 2050529, '+']
ENST00000378567	111	151	0.319	['chr1', 2050580, '+']	['chr1', 2050620, '+']
ENST00000378567	178	200	0.28255	['chr1', 2050647, '+']	['chr1', 2050669, '+']
ENST00000378567	233	274	0.28006	['chr1', 2055441, '+']	['chr1', 2055482, '+']
ENST00000378567	647	689	0.27055	['chr1', 2144275, '+']	['chr1', 2144317, '+']
ENST00000378567	975	994	0.23185	['chr1', 2150916, '+']	['chr1', 2150935, '+']
ENST00000468310	23	45	0.27182	['chr1', 2050507, '+']	['chr1', 2050529, '+']
ENST00000468310	96	136	0.319	['chr1', 2050580, '+']	['chr1', 2050620, '+']
ENST00000468310	163	185	0.28255	['chr1', 2050647, '+']	['chr1', 2050669, '+']
ENST00000468310	218	259	0.28006	['chr1', 2055441, '+']	['chr1', 2055482, '+']
ENST00000468310	542	584	0.27055	['chr1', 2144275, '+']	['chr1', 2144317, '+']
ENST00000400921	620	662	0.27055	['chr1', 2144275, '+']	['chr1', 2144317, '+']
ENST00000400921	948	967	0.23185	['chr1', 2150916, '+']	['chr1', 2150935, '+']
ENST00000461106	442	484	0.27055	['chr1', 2144275, '+']	['chr1', 2144317, '+']
ENST00000461106	770	789	0.23185	['chr1', 2150916, '+']	['chr1', 2150935, '+']
ENST00000461465	232	274	0.27055	['chr1', 2144275, '+']	['chr1', 2144317, '+']
ENST00000461465	438	457	0.23582	['chr1', 2150794, '+']	['chr1', 2150813, '+']
ENST00000470596	431	473	0.27055	['chr1', 2144275, '+']	['chr1', 2144317, '+']
ENST00000496325	288	330	0.27055	['chr1', 2144275, '+']	['chr1', 2144317, '+']
ENST00000481140	365	407	0.27055	['chr1', 2144275, '+']	['chr1', 2144317, '+']
ENST00000482686	332	374	0.27055	['chr1', 2144275, '+']	['chr1', 2144317, '+']
ENST00000486681	309	351	0.27055	['chr1', 2144275, '+']	['chr1', 2144317, '+']
ENST00000486681	811	830	0.23185	['chr1', 2150916, '+']	['chr1', 2150935, '+']
ENST00000470986	316	358	0.27055	['chr1', 2144275, '+']	['chr1', 2144317, '+']
ENST00000470986	644	663	0.23185	['chr1', 2150916, '+']	['chr1', 2150935, '+']
ENST00000497183	249	291	0.27055	['chr1', 2144275, '+']	['chr1', 2144317, '+']
ENST00000497183	700	719	0.23185	['chr1', 2150916, '+']	['chr1', 2150935, '+']
ENST00000470511	258	300	0.27055	['chr1', 2144275, '+']	['chr1', 2144317, '+']
ENST00000419838	152	194	0.27055	['chr1', 2144275, '+']	['chr1', 2144317, '+']
ENST00000479263	396	415	0.23185	['chr1', 2150916, '+']	['chr1', 2150935, '+']
ENST00000503672	417	436	0.23185	['chr1', 2150916, '+']	['chr1', 2150935, '+']
ENST00000478770	387	406	0.23185	['chr1', 2150916, '+']	['chr1', 2150935, '+']
ENST00000378536	57	81	0.25975	['chr1', 2228751, '+']	['chr1', 2228775, '+']
ENST00000378536	484	523	0.3242	['chr1', 2229178, '+']	['chr1', 2229217, '+']
ENST00000378536	1485	1509	0.251	['chr1', 2304041, '+']	['chr1', 2304065, '+']
ENST00000378536	1746	1778	0.2568	['chr1', 2304492, '+']	['chr1', 2304524, '+']
ENST00000378536	2425	2491	0.274	['chr1', 2306931, '+']	['chr1', 2306997, '+']
ENST00000378536	2625	2651	0.23785	['chr1', 2307131, '+']	['chr1', 2307157, '+']
ENST00000378536	3100	3120	0.2416	['chr1', 2307606, '+']	['chr1', 2307626, '+']
ENST00000378536	3370	3395	0.24135	['chr1', 2307876, '+']	['chr1', 2307901, '+']
ENST00000378536	3545	3580	0.23675	['chr1', 2308051, '+']	['chr1', 2308086, '+']
ENST00000378536	3653	3686	0.2547	['chr1', 2308159, '+']	['chr1', 2308192, '+']
ENST00000378536	3934	3994	0.2929	['chr1', 2308440, '+']	['chr1', 2308500, '+']
ENST00000378536	5012	5044	0.31285	['chr1', 2309518, '+']	['chr1', 2309550, '+']
ENST00000378536	5448	5467	0.2418	['chr1', 2309954, '+']	['chr1', 2309973, '+']
ENST00000378536	5555	5574	0.23129	['chr1', 2310061, '+']	['chr1', 2310080, '+']
ENST00000507179	396	420	0.251	['chr1', 2304041, '+']	['chr1', 2304065, '+']
ENST00000378513	518	545	0.24015	['chr1', 2402268, '+']	['chr1', 2402295, '+']
ENST00000378513	1229	1253	0.25165	['chr1', 2403671, '+']	['chr1', 2403695, '+']
ENST00000378513	1468	1516	0.28373	['chr1', 2403910, '+']	['chr1', 2403958, '+']
ENST00000378513	1517	1546	0.30079	['chr1', 2403959, '+']	['chr1', 2403988, '+']
ENST00000378513	1564	1612	0.3527	['chr1', 2404006, '+']	['chr1', 2404054, '+']
ENST00000378513	1613	1648	0.39918	['chr1', 2404055, '+']	['chr1', 2404090, '+']
ENST00000378513	2040	2074	0.26715	['chr1', 2404482, '+']	['chr1', 2404516, '+']
ENST00000378513	2202	2246	0.2918	['chr1', 2404644, '+']	['chr1', 2404688, '+']
ENST00000378513	2355	2381	0.28327	['chr1', 2404797, '+']	['chr1', 2404823, '+']
ENST00000378513	2390	2426	0.3314	['chr1', 2404832, '+']	['chr1', 2404868, '+']
ENST00000378513	2437	2459	0.24627	['chr1', 2404879, '+']	['chr1', 2404901, '+']
ENST00000378513	2653	2672	0.24325	['chr1', 2405095, '+']	['chr1', 2405114, '+']
ENST00000378513	2834	2874	0.2707	['chr1', 2405276, '+']	['chr1', 2405316, '+']
ENST00000378518	465	492	0.24015	['chr1', 2402268, '+']	['chr1', 2402295, '+']
ENST00000605895	560	587	0.24015	['chr1', 2402268, '+']	['chr1', 2402295, '+']
ENST00000605895	1271	1295	0.25165	['chr1', 2403671, '+']	['chr1', 2403695, '+']
ENST00000605895	1510	1558	0.28373	['chr1', 2403910, '+']	['chr1', 2403958, '+']
ENST00000605895	1559	1588	0.30079	['chr1', 2403959, '+']	['chr1', 2403988, '+']
ENST00000605895	1606	1654	0.3527	['chr1', 2404006, '+']	['chr1', 2404054, '+']
ENST00000605895	1655	1690	0.39918	['chr1', 2404055, '+']	['chr1', 2404090, '+']
ENST00000605895	2082	2116	0.26715	['chr1', 2404482, '+']	['chr1', 2404516, '+']
ENST00000605895	2244	2288	0.2918	['chr1', 2404644, '+']	['chr1', 2404688, '+']
ENST00000605895	2397	2423	0.28327	['chr1', 2404797, '+']	['chr1', 2404823, '+']
ENST00000605895	2432	2468	0.3314	['chr1', 2404832, '+']	['chr1', 2404868, '+']
ENST00000605895	2479	2501	0.24627	['chr1', 2404879, '+']	['chr1', 2404901, '+']
ENST00000605895	2695	2714	0.24325	['chr1', 2405095, '+']	['chr1', 2405114, '+']
ENST00000605895	2876	2916	0.2707	['chr1', 2405276, '+']	['chr1', 2405316, '+']
ENST00000306256	591	618	0.24015	['chr1', 2402268, '+']	['chr1', 2402295, '+']
ENST00000378512	613	640	0.24015	['chr1', 2402268, '+']	['chr1', 2402295, '+']
ENST00000378512	1324	1348	0.25165	['chr1', 2403671, '+']	['chr1', 2403695, '+']
ENST00000443438	494	519	0.29336	['chr1', 2402270, '+']	['chr1', 2402295, '+']
ENST00000488353	2213	2240	0.24015	['chr1', 2402268, '+']	['chr1', 2402295, '+']
ENST00000462129	318	345	0.24015	['chr1', 2402268, '+']	['chr1', 2402295, '+']
ENST00000493183	158	192	0.27575	['chr1', 2587147, '+']	['chr1', 2587181, '+']
ENST00000493183	266	309	0.27518	['chr1', 2587255, '+']	['chr1', 2587743, '+']
ENST00000474659	109	143	0.27575	['chr1', 2587147, '+']	['chr1', 2587181, '+']
ENST00000474659	217	260	0.27518	['chr1', 2587255, '+']	['chr1', 2587743, '+']
ENST00000474659	730	764	0.26654	['chr1', 2589603, '+']	['chr1', 2589637, '+']
ENST00000378425	256	290	0.27575	['chr1', 2587147, '+']	['chr1', 2587181, '+']
ENST00000378425	364	407	0.27518	['chr1', 2587255, '+']	['chr1', 2587743, '+']
ENST00000378425	801	827	0.25725	['chr1', 2589603, '+']	['chr1', 2589629, '+']
ENST00000378425	1392	1428	0.2745	['chr1', 2590194, '+']	['chr1', 2590230, '+']
ENST00000378425	1681	1719	0.28465	['chr1', 2590483, '+']	['chr1', 2590521, '+']
ENST00000378425	1727	1751	0.26895	['chr1', 2590529, '+']	['chr1', 2590553, '+']
ENST00000378425	1912	1933	0.23735	['chr1', 2590714, '+']	['chr1', 2590735, '+']
ENST00000378425	2064	2083	0.2312	['chr1', 2590866, '+']	['chr1', 2590885, '+']
ENST00000378425	2104	2136	0.2467	['chr1', 2590906, '+']	['chr1', 2590938, '+']
ENST00000378425	2412	2431	0.23295	['chr1', 2591214, '+']	['chr1', 2591233, '+']
ENST00000378425	2503	2531	0.25025	['chr1', 2591305, '+']	['chr1', 2591333, '+']
ENST00000444521	256	290	0.27575	['chr1', 2587147, '+']	['chr1', 2587181, '+']
ENST00000444521	364	407	0.27518	['chr1', 2587255, '+']	['chr1', 2587743, '+']
ENST00000444521	963	989	0.25725	['chr1', 2589603, '+']	['chr1', 2589629, '+']
ENST00000444521	1554	1590	0.2745	['chr1', 2590194, '+']	['chr1', 2590230, '+']
ENST00000444521	1843	1881	0.28465	['chr1', 2590483, '+']	['chr1', 2590521, '+']
ENST00000444521	1889	1913	0.26895	['chr1', 2590529, '+']	['chr1', 2590553, '+']
ENST00000444521	2074	2095	0.23735	['chr1', 2590714, '+']	['chr1', 2590735, '+']
ENST00000444521	2226	2245	0.2312	['chr1', 2590866, '+']	['chr1', 2590885, '+']
ENST00000444521	2266	2298	0.2467	['chr1', 2590906, '+']	['chr1', 2590938, '+']
ENST00000444521	2574	2593	0.23295	['chr1', 2591214, '+']	['chr1', 2591233, '+']
ENST00000444521	2665	2693	0.25025	['chr1', 2591305, '+']	['chr1', 2591333, '+']
ENST00000419916	231	265	0.27575	['chr1', 2587147, '+']	['chr1', 2587181, '+']
ENST00000419916	339	382	0.27518	['chr1', 2587255, '+']	['chr1', 2587743, '+']
ENST00000419916	884	910	0.25725	['chr1', 2589603, '+']	['chr1', 2589629, '+']
ENST00000419916	1475	1511	0.2745	['chr1', 2590194, '+']	['chr1', 2590230, '+']
ENST00000419916	1764	1802	0.28465	['chr1', 2590483, '+']	['chr1', 2590521, '+']
ENST00000419916	1810	1834	0.26895	['chr1', 2590529, '+']	['chr1', 2590553, '+']
ENST00000419916	1995	2016	0.23735	['chr1', 2590714, '+']	['chr1', 2590735, '+']
ENST00000419916	2147	2166	0.2312	['chr1', 2590866, '+']	['chr1', 2590885, '+']
ENST00000419916	2187	2219	0.2467	['chr1', 2590906, '+']	['chr1', 2590938, '+']
ENST00000419916	2495	2514	0.23295	['chr1', 2591214, '+']	['chr1', 2591233, '+']
ENST00000419916	2586	2614	0.25025	['chr1', 2591305, '+']	['chr1', 2591333, '+']
ENST00000378424	226	260	0.27575	['chr1', 2587147, '+']	['chr1', 2587181, '+']
ENST00000378424	334	377	0.27518	['chr1', 2587255, '+']	['chr1', 2587743, '+']
ENST00000378424	901	927	0.25725	['chr1', 2589603, '+']	['chr1', 2589629, '+']
ENST00000378424	1492	1528	0.2745	['chr1', 2590194, '+']	['chr1', 2590230, '+']
ENST00000378424	1781	1819	0.28465	['chr1', 2590483, '+']	['chr1', 2590521, '+']
ENST00000378424	1827	1851	0.26895	['chr1', 2590529, '+']	['chr1', 2590553, '+']
ENST00000378424	2012	2033	0.23735	['chr1', 2590714, '+']	['chr1', 2590735, '+']
ENST00000378424	2164	2183	0.2312	['chr1', 2590866, '+']	['chr1', 2590885, '+']
ENST00000378424	2204	2236	0.2467	['chr1', 2590906, '+']	['chr1', 2590938, '+']
ENST00000378424	2512	2531	0.23295	['chr1', 2591214, '+']	['chr1', 2591233, '+']
ENST00000378424	2603	2631	0.25025	['chr1', 2591305, '+']	['chr1', 2591333, '+']
ENST00000537325	210	244	0.27575	['chr1', 2587147, '+']	['chr1', 2587181, '+']
ENST00000537325	318	361	0.27518	['chr1', 2587255, '+']	['chr1', 2587743, '+']
ENST00000537325	752	778	0.25725	['chr1', 2589603, '+']	['chr1', 2589629, '+']
ENST00000378427	208	242	0.27575	['chr1', 2587147, '+']	['chr1', 2587181, '+']
ENST00000378427	316	359	0.27518	['chr1', 2587255, '+']	['chr1', 2587743, '+']
ENST00000378427	829	855	0.25725	['chr1', 2589603, '+']	['chr1', 2589629, '+']
ENST00000378427	1420	1456	0.2745	['chr1', 2590194, '+']	['chr1', 2590230, '+']
ENST00000378427	1709	1747	0.28465	['chr1', 2590483, '+']	['chr1', 2590521, '+']
ENST00000378427	1755	1779	0.26895	['chr1', 2590529, '+']	['chr1', 2590553, '+']
ENST00000378427	1940	1961	0.23735	['chr1', 2590714, '+']	['chr1', 2590735, '+']
ENST00000378427	2092	2111	0.2312	['chr1', 2590866, '+']	['chr1', 2590885, '+']
ENST00000378427	2132	2164	0.2467	['chr1', 2590906, '+']	['chr1', 2590938, '+']
ENST00000378427	2440	2459	0.23295	['chr1', 2591214, '+']	['chr1', 2591233, '+']
ENST00000378427	2531	2559	0.25025	['chr1', 2591305, '+']	['chr1', 2591333, '+']
ENST00000464043	91	125	0.27575	['chr1', 2587147, '+']	['chr1', 2587181, '+']
ENST00000464043	199	242	0.27518	['chr1', 2587255, '+']	['chr1', 2587743, '+']
ENST00000464043	744	770	0.25725	['chr1', 2589603, '+']	['chr1', 2589629, '+']
ENST00000498083	129	163	0.27575	['chr1', 2587147, '+']	['chr1', 2587181, '+']
ENST00000498083	237	280	0.27518	['chr1', 2587255, '+']	['chr1', 2587743, '+']
ENST00000484099	70	104	0.27575	['chr1', 2587147, '+']	['chr1', 2587181, '+']
ENST00000484099	178	221	0.27518	['chr1', 2587255, '+']	['chr1', 2587743, '+']
ENST00000484099	711	737	0.25725	['chr1', 2589603, '+']	['chr1', 2589629, '+']
ENST00000484099	1302	1338	0.2745	['chr1', 2590194, '+']	['chr1', 2590230, '+']
ENST00000484099	1591	1629	0.28465	['chr1', 2590483, '+']	['chr1', 2590521, '+']
ENST00000484099	1637	1661	0.26895	['chr1', 2590529, '+']	['chr1', 2590553, '+']
ENST00000484099	1822	1843	0.23735	['chr1', 2590714, '+']	['chr1', 2590735, '+']
ENST00000484099	1974	1993	0.2312	['chr1', 2590866, '+']	['chr1', 2590885, '+']
ENST00000484099	2014	2046	0.2467	['chr1', 2590906, '+']	['chr1', 2590938, '+']
ENST00000484099	2322	2341	0.23295	['chr1', 2591214, '+']	['chr1', 2591233, '+']
ENST00000484099	2413	2441	0.25025	['chr1', 2591305, '+']	['chr1', 2591333, '+']
ENST00000476686	641	667	0.25725	['chr1', 2589603, '+']	['chr1', 2589629, '+']
ENST00000476686	1232	1268	0.2745	['chr1', 2590194, '+']	['chr1', 2590230, '+']
ENST00000476686	1521	1559	0.28465	['chr1', 2590483, '+']	['chr1', 2590521, '+']
ENST00000476686	1567	1591	0.26895	['chr1', 2590529, '+']	['chr1', 2590553, '+']
ENST00000476686	1752	1773	0.23735	['chr1', 2590714, '+']	['chr1', 2590735, '+']
ENST00000476686	1904	1923	0.2312	['chr1', 2590866, '+']	['chr1', 2590885, '+']
ENST00000476686	1944	1976	0.2467	['chr1', 2590906, '+']	['chr1', 2590938, '+']
ENST00000476686	2252	2271	0.23295	['chr1', 2591214, '+']	['chr1', 2591233, '+']
ENST00000476686	2343	2371	0.25025	['chr1', 2591305, '+']	['chr1', 2591333, '+']
ENST00000378295	353	385	0.28335	['chr1', 3707560, '+']	['chr1', 3707592, '+']
ENST00000378295	458	477	0.23235	['chr1', 3707665, '+']	['chr1', 3707684, '+']
ENST00000378295	498	547	0.2582	['chr1', 3707705, '+']	['chr1', 3707754, '+']
ENST00000378295	593	621	0.25245	['chr1', 3722029, '+']	['chr1', 3722057, '+']
ENST00000378295	708	737	0.242	['chr1', 3722144, '+']	['chr1', 3722173, '+']
ENST00000378295	925	957	0.257	['chr1', 3727152, '+']	['chr1', 3727184, '+']
ENST00000378295	1021	1046	0.24785	['chr1', 3727651, '+']	['chr1', 3727676, '+']
ENST00000378295	1266	1292	0.27377	['chr1', 3729363, '+']	['chr1', 3729389, '+']
ENST00000378295	1304	1325	0.2385	['chr1', 3729401, '+']	['chr1', 3729422, '+']
ENST00000378295	1332	1360	0.30282	['chr1', 3729429, '+']	['chr1', 3730008, '+']
ENST00000378295	1843	1891	0.26945	['chr1', 3732856, '+']	['chr1', 3732904, '+']
ENST00000378295	2313	2332	0.2336	['chr1', 3733326, '+']	['chr1', 3733345, '+']
ENST00000378295	2336	2373	0.27635	['chr1', 3733349, '+']	['chr1', 3733386, '+']
ENST00000378295	2540	2559	0.2322	['chr1', 3733553, '+']	['chr1', 3733572, '+']
ENST00000378295	4091	4120	0.35475	['chr1', 3735104, '+']	['chr1', 3735133, '+']
ENST00000378295	4835	4857	0.2527	['chr1', 3735848, '+']	['chr1', 3735870, '+']
ENST00000378295	4861	4892	0.2503	['chr1', 3735874, '+']	['chr1', 3735905, '+']
ENST00000604074	353	385	0.28335	['chr1', 3707560, '+']	['chr1', 3707592, '+']
ENST00000604074	458	477	0.23235	['chr1', 3707665, '+']	['chr1', 3707684, '+']
ENST00000604074	498	547	0.2582	['chr1', 3707705, '+']	['chr1', 3707754, '+']
ENST00000604074	593	621	0.25245	['chr1', 3722029, '+']	['chr1', 3722057, '+']
ENST00000604074	708	737	0.242	['chr1', 3722144, '+']	['chr1', 3722173, '+']
ENST00000604074	925	957	0.257	['chr1', 3727152, '+']	['chr1', 3727184, '+']
ENST00000604074	1021	1046	0.24785	['chr1', 3727651, '+']	['chr1', 3727676, '+']
ENST00000604074	1266	1292	0.27377	['chr1', 3729363, '+']	['chr1', 3729389, '+']
ENST00000604074	1304	1325	0.2385	['chr1', 3729401, '+']	['chr1', 3729422, '+']
ENST00000604074	1332	1353	0.2429	['chr1', 3729429, '+']	['chr1', 3732748, '+']
ENST00000604074	1461	1509	0.26945	['chr1', 3732856, '+']	['chr1', 3732904, '+']
ENST00000604074	1931	1950	0.2336	['chr1', 3733326, '+']	['chr1', 3733345, '+']
ENST00000604074	1954	1991	0.27635	['chr1', 3733349, '+']	['chr1', 3733386, '+']
ENST00000604074	2158	2177	0.2322	['chr1', 3733553, '+']	['chr1', 3733572, '+']
ENST00000604074	3709	3738	0.35475	['chr1', 3735104, '+']	['chr1', 3735133, '+']
ENST00000604074	4453	4475	0.2527	['chr1', 3735848, '+']	['chr1', 3735870, '+']
ENST00000604074	4479	4510	0.2503	['chr1', 3735874, '+']	['chr1', 3735905, '+']
ENST00000354437	308	340	0.28335	['chr1', 3707560, '+']	['chr1', 3707592, '+']
ENST00000354437	413	432	0.23235	['chr1', 3707665, '+']	['chr1', 3707684, '+']
ENST00000354437	453	502	0.2582	['chr1', 3707705, '+']	['chr1', 3707754, '+']
ENST00000354437	548	576	0.25245	['chr1', 3722029, '+']	['chr1', 3722057, '+']
ENST00000354437	663	692	0.242	['chr1', 3722144, '+']	['chr1', 3722173, '+']
ENST00000354437	880	912	0.257	['chr1', 3727152, '+']	['chr1', 3727184, '+']
ENST00000354437	976	1001	0.24785	['chr1', 3727651, '+']	['chr1', 3727676, '+']
ENST00000354437	1221	1247	0.27377	['chr1', 3729363, '+']	['chr1', 3729389, '+']
ENST00000354437	1259	1280	0.2385	['chr1', 3729401, '+']	['chr1', 3729422, '+']
ENST00000354437	1287	1315	0.30282	['chr1', 3729429, '+']	['chr1', 3730008, '+']
ENST00000354437	1704	1752	0.26945	['chr1', 3732856, '+']	['chr1', 3732904, '+']
ENST00000346387	308	340	0.28335	['chr1', 3707560, '+']	['chr1', 3707592, '+']
ENST00000346387	413	432	0.23235	['chr1', 3707665, '+']	['chr1', 3707684, '+']
ENST00000346387	453	502	0.2582	['chr1', 3707705, '+']	['chr1', 3707754, '+']
ENST00000346387	548	576	0.25245	['chr1', 3722029, '+']	['chr1', 3722057, '+']
ENST00000346387	663	692	0.242	['chr1', 3722144, '+']	['chr1', 3722173, '+']
ENST00000346387	880	912	0.257	['chr1', 3727152, '+']	['chr1', 3727184, '+']
ENST00000346387	976	1001	0.24785	['chr1', 3727651, '+']	['chr1', 3727676, '+']
ENST00000346387	1221	1247	0.27377	['chr1', 3729363, '+']	['chr1', 3729389, '+']
ENST00000346387	1259	1280	0.2385	['chr1', 3729401, '+']	['chr1', 3729422, '+']
ENST00000346387	1287	1315	0.30282	['chr1', 3729429, '+']	['chr1', 3731471, '+']
ENST00000346387	1510	1558	0.26945	['chr1', 3732856, '+']	['chr1', 3732904, '+']
ENST00000346387	1980	1999	0.2336	['chr1', 3733326, '+']	['chr1', 3733345, '+']
ENST00000346387	2003	2040	0.27635	['chr1', 3733349, '+']	['chr1', 3733386, '+']
ENST00000346387	2207	2226	0.2322	['chr1', 3733553, '+']	['chr1', 3733572, '+']
ENST00000346387	3758	3787	0.35475	['chr1', 3735104, '+']	['chr1', 3735133, '+']
ENST00000346387	4502	4524	0.2527	['chr1', 3735848, '+']	['chr1', 3735870, '+']
ENST00000346387	4528	4559	0.2503	['chr1', 3735874, '+']	['chr1', 3735905, '+']
ENST00000357733	308	340	0.28335	['chr1', 3707560, '+']	['chr1', 3707592, '+']
ENST00000357733	413	432	0.23235	['chr1', 3707665, '+']	['chr1', 3707684, '+']
ENST00000357733	453	502	0.2582	['chr1', 3707705, '+']	['chr1', 3707754, '+']
ENST00000357733	548	576	0.25245	['chr1', 3722029, '+']	['chr1', 3722057, '+']
ENST00000357733	663	692	0.242	['chr1', 3722144, '+']	['chr1', 3722173, '+']
ENST00000357733	880	912	0.257	['chr1', 3727152, '+']	['chr1', 3727184, '+']
ENST00000357733	976	1001	0.24785	['chr1', 3727651, '+']	['chr1', 3727676, '+']
ENST00000357733	1221	1247	0.27377	['chr1', 3729363, '+']	['chr1', 3729389, '+']
ENST00000357733	1259	1280	0.2385	['chr1', 3729401, '+']	['chr1', 3729422, '+']
ENST00000357733	1287	1307	0.2317	['chr1', 3729429, '+']	['chr1', 3730927, '+']
ENST00000357733	1555	1603	0.26945	['chr1', 3732856, '+']	['chr1', 3732904, '+']
ENST00000357733	2025	2044	0.2336	['chr1', 3733326, '+']	['chr1', 3733345, '+']
ENST00000357733	2048	2085	0.27635	['chr1', 3733349, '+']	['chr1', 3733386, '+']
ENST00000357733	2252	2271	0.2322	['chr1', 3733553, '+']	['chr1', 3733572, '+']
ENST00000357733	3803	3832	0.35475	['chr1', 3735104, '+']	['chr1', 3735133, '+']
ENST00000357733	4547	4569	0.2527	['chr1', 3735848, '+']	['chr1', 3735870, '+']
ENST00000357733	4573	4604	0.2503	['chr1', 3735874, '+']	['chr1', 3735905, '+']
ENST00000603362	198	230	0.28335	['chr1', 3707560, '+']	['chr1', 3707592, '+']
ENST00000603362	303	322	0.23235	['chr1', 3707665, '+']	['chr1', 3707684, '+']
ENST00000603362	343	392	0.2582	['chr1', 3707705, '+']	['chr1', 3707754, '+']
ENST00000603362	438	466	0.25245	['chr1', 3722029, '+']	['chr1', 3722057, '+']
ENST00000603362	553	582	0.242	['chr1', 3722144, '+']	['chr1', 3722173, '+']
ENST00000603362	770	802	0.257	['chr1', 3727152, '+']	['chr1', 3727184, '+']
ENST00000603362	866	891	0.24785	['chr1', 3727651, '+']	['chr1', 3727676, '+']
ENST00000603362	1111	1137	0.27377	['chr1', 3729363, '+']	['chr1', 3729389, '+']
ENST00000603362	1149	1170	0.2385	['chr1', 3729401, '+']	['chr1', 3729422, '+']
ENST00000603362	1177	1197	0.2317	['chr1', 3729429, '+']	['chr1', 3730927, '+']
ENST00000603362	1445	1493	0.26945	['chr1', 3732856, '+']	['chr1', 3732904, '+']
ENST00000604479	198	230	0.28335	['chr1', 3707560, '+']	['chr1', 3707592, '+']
ENST00000604479	303	322	0.23235	['chr1', 3707665, '+']	['chr1', 3707684, '+']
ENST00000604479	343	392	0.2582	['chr1', 3707705, '+']	['chr1', 3707754, '+']
ENST00000604479	438	466	0.25245	['chr1', 3722029, '+']	['chr1', 3722057, '+']
ENST00000604479	553	582	0.242	['chr1', 3722144, '+']	['chr1', 3722173, '+']
ENST00000604479	770	802	0.257	['chr1', 3727152, '+']	['chr1', 3727184, '+']
ENST00000604479	866	891	0.24785	['chr1', 3727651, '+']	['chr1', 3727676, '+']
ENST00000604479	1111	1137	0.27377	['chr1', 3729363, '+']	['chr1', 3729389, '+']
ENST00000604479	1149	1170	0.2385	['chr1', 3729401, '+']	['chr1', 3729422, '+']
ENST00000604479	1177	1205	0.30282	['chr1', 3729429, '+']	['chr1', 3731471, '+']
ENST00000604479	1400	1448	0.26945	['chr1', 3732856, '+']	['chr1', 3732904, '+']
ENST00000378280	285	317	0.28335	['chr1', 3707560, '+']	['chr1', 3707592, '+']
ENST00000378280	390	409	0.23235	['chr1', 3707665, '+']	['chr1', 3707684, '+']
ENST00000378280	430	479	0.2582	['chr1', 3707705, '+']	['chr1', 3707754, '+']
ENST00000378280	525	553	0.25245	['chr1', 3722029, '+']	['chr1', 3722057, '+']
ENST00000378280	640	669	0.242	['chr1', 3722144, '+']	['chr1', 3722173, '+']
ENST00000378280	857	889	0.257	['chr1', 3727152, '+']	['chr1', 3727184, '+']
ENST00000378280	953	978	0.24785	['chr1', 3727651, '+']	['chr1', 3727676, '+']
ENST00000378280	1198	1224	0.27377	['chr1', 3729363, '+']	['chr1', 3729389, '+']
ENST00000378280	1236	1257	0.2385	['chr1', 3729401, '+']	['chr1', 3729422, '+']
ENST00000378280	1264	1284	0.2317	['chr1', 3729429, '+']	['chr1', 3730927, '+']
ENST00000378280	1626	1674	0.26945	['chr1', 3732856, '+']	['chr1', 3732904, '+']
ENST00000378285	285	317	0.28335	['chr1', 3707560, '+']	['chr1', 3707592, '+']
ENST00000378285	390	409	0.23235	['chr1', 3707665, '+']	['chr1', 3707684, '+']
ENST00000378285	430	479	0.2582	['chr1', 3707705, '+']	['chr1', 3707754, '+']
ENST00000378285	525	553	0.25245	['chr1', 3722029, '+']	['chr1', 3722057, '+']
ENST00000378285	640	669	0.242	['chr1', 3722144, '+']	['chr1', 3722173, '+']
ENST00000378285	857	889	0.257	['chr1', 3727152, '+']	['chr1', 3727184, '+']
ENST00000378285	953	978	0.24785	['chr1', 3727651, '+']	['chr1', 3727676, '+']
ENST00000378285	1198	1224	0.27377	['chr1', 3729363, '+']	['chr1', 3729389, '+']
ENST00000378285	1236	1257	0.2385	['chr1', 3729401, '+']	['chr1', 3729422, '+']
ENST00000378285	1264	1292	0.30282	['chr1', 3729429, '+']	['chr1', 3730008, '+']
ENST00000378285	1681	1729	0.26945	['chr1', 3732856, '+']	['chr1', 3732904, '+']
ENST00000378288	285	317	0.28335	['chr1', 3707560, '+']	['chr1', 3707592, '+']
ENST00000378288	390	409	0.23235	['chr1', 3707665, '+']	['chr1', 3707684, '+']
ENST00000378288	430	479	0.2582	['chr1', 3707705, '+']	['chr1', 3707754, '+']
ENST00000378288	525	553	0.25245	['chr1', 3722029, '+']	['chr1', 3722057, '+']
ENST00000378288	640	669	0.242	['chr1', 3722144, '+']	['chr1', 3722173, '+']
ENST00000378288	857	889	0.257	['chr1', 3727152, '+']	['chr1', 3727184, '+']
ENST00000378288	953	978	0.24785	['chr1', 3727651, '+']	['chr1', 3727676, '+']
ENST00000378288	1198	1224	0.27377	['chr1', 3729363, '+']	['chr1', 3729389, '+']
ENST00000378288	1236	1257	0.2385	['chr1', 3729401, '+']	['chr1', 3729422, '+']
ENST00000378288	1264	1292	0.30282	['chr1', 3729429, '+']	['chr1', 3730008, '+']
ENST00000378288	1775	1823	0.26945	['chr1', 3732856, '+']	['chr1', 3732904, '+']
ENST00000378288	2245	2264	0.2336	['chr1', 3733326, '+']	['chr1', 3733345, '+']
ENST00000378288	2268	2305	0.27635	['chr1', 3733349, '+']	['chr1', 3733386, '+']
ENST00000378288	2472	2491	0.2322	['chr1', 3733553, '+']	['chr1', 3733572, '+']
ENST00000378288	4023	4052	0.35475	['chr1', 3735104, '+']	['chr1', 3735133, '+']
ENST00000378288	4767	4789	0.2527	['chr1', 3735848, '+']	['chr1', 3735870, '+']
ENST00000378288	4793	4824	0.2503	['chr1', 3735874, '+']	['chr1', 3735905, '+']
ENST00000378290	106	138	0.28335	['chr1', 3707560, '+']	['chr1', 3707592, '+']
ENST00000378290	211	230	0.23235	['chr1', 3707665, '+']	['chr1', 3707684, '+']
ENST00000378290	251	300	0.2582	['chr1', 3707705, '+']	['chr1', 3707754, '+']
ENST00000378290	346	374	0.25245	['chr1', 3722029, '+']	['chr1', 3722057, '+']
ENST00000378290	461	490	0.242	['chr1', 3722144, '+']	['chr1', 3722173, '+']
ENST00000378290	678	710	0.257	['chr1', 3727152, '+']	['chr1', 3727184, '+']
ENST00000378290	774	799	0.24785	['chr1', 3727651, '+']	['chr1', 3727676, '+']
ENST00000378290	1019	1045	0.27377	['chr1', 3729363, '+']	['chr1', 3729389, '+']
ENST00000378290	1057	1078	0.2385	['chr1', 3729401, '+']	['chr1', 3729422, '+']
ENST00000378290	1085	1113	0.30282	['chr1', 3729429, '+']	['chr1', 3730008, '+']
ENST00000378290	1596	1644	0.26945	['chr1', 3732856, '+']	['chr1', 3732904, '+']
ENST00000604566	174	199	0.24785	['chr1', 3727651, '+']	['chr1', 3727676, '+']
ENST00000604566	419	445	0.27377	['chr1', 3729363, '+']	['chr1', 3729389, '+']
ENST00000604566	457	478	0.2385	['chr1', 3729401, '+']	['chr1', 3729422, '+']
ENST00000604566	485	505	0.2317	['chr1', 3729429, '+']	['chr1', 3730927, '+']
ENST00000604566	847	895	0.26945	['chr1', 3732856, '+']	['chr1', 3732904, '+']
ENST00000466813	164	193	0.2702	['chr1', 6588069, '+']	['chr1', 6588098, '+']
ENST00000466813	196	238	0.26925	['chr1', 6588101, '+']	['chr1', 6588143, '+']
ENST00000466813	351	371	0.266	['chr1', 6588337, '+']	['chr1', 6588357, '+']
ENST00000466941	410	432	0.23745	['chr1', 6589167, '+']	['chr1', 6589189, '+']
ENST00000466941	438	457	0.23775	['chr1', 6589195, '+']	['chr1', 6589214, '+']
ENST00000377648	167	186	0.24633	['chr1', 6613851, '+']	['chr1', 6613870, '+']
ENST00000377648	212	231	0.23215	['chr1', 6613896, '+']	['chr1', 6613915, '+']
ENST00000377648	275	298	0.29164	['chr1', 6613959, '+']	['chr1', 6613982, '+']
ENST00000377648	333	352	0.23353	['chr1', 6614017, '+']	['chr1', 6614036, '+']
ENST00000377648	378	419	0.27127	['chr1', 6614062, '+']	['chr1', 6614103, '+']
ENST00000377648	633	684	0.25786	['chr1', 6619912, '+']	['chr1', 6619963, '+']
ENST00000377648	792	823	0.32418	['chr1', 6620071, '+']	['chr1', 6620102, '+']
ENST00000377648	836	872	0.279	['chr1', 6620115, '+']	['chr1', 6620151, '+']
ENST00000377648	980	1012	0.24125	['chr1', 6620259, '+']	['chr1', 6620291, '+']
ENST00000377648	1021	1043	0.287	['chr1', 6620300, '+']	['chr1', 6620322, '+']
ENST00000377648	1168	1245	0.36185	['chr1', 6621520, '+']	['chr1', 6621597, '+']
ENST00000377648	1254	1302	0.35442	['chr1', 6621606, '+']	['chr1', 6621654, '+']
ENST00000377648	1346	1365	0.2411	['chr1', 6621698, '+']	['chr1', 6621717, '+']
ENST00000377648	1583	1612	0.2455	['chr1', 6621935, '+']	['chr1', 6621964, '+']
ENST00000377648	1938	1970	0.35841	['chr1', 6622290, '+']	['chr1', 6622322, '+']
ENST00000377648	2055	2074	0.24791	['chr1', 6622407, '+']	['chr1', 6622426, '+']
ENST00000377648	2075	2099	0.30442	['chr1', 6622427, '+']	['chr1', 6622451, '+']
ENST00000377648	2350	2379	0.38736	['chr1', 6622702, '+']	['chr1', 6622731, '+']
ENST00000377648	2423	2442	0.23325	['chr1', 6622775, '+']	['chr1', 6622794, '+']
ENST00000377648	2660	2683	0.26155	['chr1', 6623012, '+']	['chr1', 6623035, '+']
ENST00000377648	2685	2739	0.2772	['chr1', 6623037, '+']	['chr1', 6623091, '+']
ENST00000377648	2807	2836	0.2676	['chr1', 6623159, '+']	['chr1', 6623188, '+']
ENST00000377648	2932	2951	0.23782	['chr1', 6623284, '+']	['chr1', 6623303, '+']
ENST00000377648	3221	3252	0.28405	['chr1', 6623573, '+']	['chr1', 6623604, '+']
ENST00000377648	3411	3449	0.26319	['chr1', 6623763, '+']	['chr1', 6623801, '+']
ENST00000377648	3452	3471	0.23664	['chr1', 6623804, '+']	['chr1', 6623823, '+']
ENST00000495385	90	109	0.24633	['chr1', 6613851, '+']	['chr1', 6613870, '+']
ENST00000495385	135	154	0.23215	['chr1', 6613896, '+']	['chr1', 6613915, '+']
ENST00000495385	198	221	0.29164	['chr1', 6613959, '+']	['chr1', 6613982, '+']
ENST00000495385	256	275	0.23353	['chr1', 6614017, '+']	['chr1', 6614036, '+']
ENST00000495385	301	342	0.27127	['chr1', 6614062, '+']	['chr1', 6614103, '+']
ENST00000495385	443	475	0.35841	['chr1', 6622290, '+']	['chr1', 6622322, '+']
ENST00000495385	560	579	0.24791	['chr1', 6622407, '+']	['chr1', 6622426, '+']
ENST00000495385	580	604	0.30442	['chr1', 6622427, '+']	['chr1', 6622451, '+']
ENST00000054650	245	273	0.2538	['chr1', 6628511, '+']	['chr1', 6628539, '+']
ENST00000054650	294	331	0.2833	['chr1', 6628560, '+']	['chr1', 6628597, '+']
ENST00000054650	485	653	0.3784	['chr1', 6630347, '+']	['chr1', 6632852, '+']
ENST00000054650	739	775	0.2818	['chr1', 6632938, '+']	['chr1', 6632974, '+']
ENST00000054650	870	889	0.23906	['chr1', 6633069, '+']	['chr1', 6633088, '+']
ENST00000054650	891	928	0.29495	['chr1', 6633090, '+']	['chr1', 6633127, '+']
ENST00000054650	1076	1110	0.24915	['chr1', 6633275, '+']	['chr1', 6633309, '+']
ENST00000054650	1249	1269	0.233	['chr1', 6633448, '+']	['chr1', 6633468, '+']
ENST00000054650	1293	1312	0.23805	['chr1', 6633492, '+']	['chr1', 6633511, '+']
ENST00000307896	125	153	0.2538	['chr1', 6628511, '+']	['chr1', 6628539, '+']
ENST00000307896	174	211	0.2833	['chr1', 6628560, '+']	['chr1', 6628597, '+']
ENST00000307896	362	530	0.3784	['chr1', 6630347, '+']	['chr1', 6632852, '+']
ENST00000307896	616	652	0.2818	['chr1', 6632938, '+']	['chr1', 6632974, '+']
ENST00000307896	747	766	0.23906	['chr1', 6633069, '+']	['chr1', 6633088, '+']
ENST00000307896	768	805	0.29495	['chr1', 6633090, '+']	['chr1', 6633127, '+']
ENST00000307896	953	987	0.24915	['chr1', 6633275, '+']	['chr1', 6633309, '+']
ENST00000484669	155	323	0.3784	['chr1', 6630347, '+']	['chr1', 6632852, '+']
ENST00000484669	409	445	0.2818	['chr1', 6632938, '+']	['chr1', 6632974, '+']
ENST00000484669	540	559	0.23906	['chr1', 6633069, '+']	['chr1', 6633088, '+']
ENST00000484669	561	598	0.29495	['chr1', 6633090, '+']	['chr1', 6633127, '+']
ENST00000487819	81	109	0.2538	['chr1', 6628511, '+']	['chr1', 6628539, '+']
ENST00000487819	130	167	0.2833	['chr1', 6628560, '+']	['chr1', 6628597, '+']
ENST00000487819	403	571	0.3784	['chr1', 6630347, '+']	['chr1', 6632852, '+']
ENST00000487819	657	693	0.2818	['chr1', 6632938, '+']	['chr1', 6632974, '+']
ENST00000487819	788	807	0.23906	['chr1', 6633069, '+']	['chr1', 6633088, '+']
ENST00000472925	76	104	0.2538	['chr1', 6628511, '+']	['chr1', 6628539, '+']
ENST00000472925	125	162	0.2833	['chr1', 6628560, '+']	['chr1', 6628597, '+']
ENST00000472925	316	424	0.3784	['chr1', 6630347, '+']	['chr1', 6632492, '+']
ENST00000472925	720	784	0.28395	['chr1', 6632788, '+']	['chr1', 6632852, '+']
ENST00000472925	870	906	0.2818	['chr1', 6632938, '+']	['chr1', 6632974, '+']
ENST00000480647	117	145	0.2538	['chr1', 6628511, '+']	['chr1', 6628539, '+']
ENST00000480647	166	203	0.2833	['chr1', 6628560, '+']	['chr1', 6628597, '+']
ENST00000490738	284	320	0.2506	['chr1', 6871799, '+']	['chr1', 6871835, '+']
ENST00000490738	358	377	0.23709	['chr1', 6871873, '+']	['chr1', 6871892, '+']
ENST00000490738	380	409	0.2458	['chr1', 6871895, '+']	['chr1', 6871924, '+']
ENST00000476163	274	310	0.2506	['chr1', 6871799, '+']	['chr1', 6871835, '+']
ENST00000476163	350	370	0.24055	['chr1', 6887688, '+']	['chr1', 6887708, '+']
ENST00000476163	396	430	0.30795	['chr1', 6887734, '+']	['chr1', 6887768, '+']
ENST00000476163	537	562	0.31058	['chr1', 6887875, '+']	['chr1', 6887900, '+']
ENST00000476163	565	594	0.2611	['chr1', 6887903, '+']	['chr1', 6887932, '+']
ENST00000476163	644	671	0.26565	['chr1', 6887982, '+']	['chr1', 6888009, '+']
ENST00000476163	683	757	0.3456	['chr1', 6888021, '+']	['chr1', 6888095, '+']
ENST00000476163	800	842	0.38509	['chr1', 6888138, '+']	['chr1', 6888180, '+']
ENST00000473578	328	364	0.2506	['chr1', 6871799, '+']	['chr1', 6871835, '+']
ENST00000473578	402	421	0.23709	['chr1', 6871873, '+']	['chr1', 6871892, '+']
ENST00000473578	424	453	0.2458	['chr1', 6871895, '+']	['chr1', 6871924, '+']
ENST00000557126	309	329	0.24055	['chr1', 6887688, '+']	['chr1', 6887708, '+']
ENST00000557126	355	389	0.30795	['chr1', 6887734, '+']	['chr1', 6887768, '+']
ENST00000467404	326	362	0.2506	['chr1', 6871799, '+']	['chr1', 6871835, '+']
ENST00000467404	400	419	0.23709	['chr1', 6871873, '+']	['chr1', 6871892, '+']
ENST00000467404	422	451	0.2458	['chr1', 6871895, '+']	['chr1', 6871924, '+']
ENST00000461311	256	292	0.2506	['chr1', 6871799, '+']	['chr1', 6871835, '+']
ENST00000461311	332	352	0.24055	['chr1', 6887688, '+']	['chr1', 6887708, '+']
ENST00000461311	378	410	0.39518	['chr1', 6887734, '+']	['chr1', 6887766, '+']
ENST00000486138	333	358	0.2506	['chr1', 6871799, '+']	['chr1', 6871824, '+']
ENST00000482934	4	23	0.232	['chr1', 6825113, '+']	['chr1', 6825132, '+']
ENST00000482934	243	263	0.24055	['chr1', 6887688, '+']	['chr1', 6887708, '+']
ENST00000482934	289	323	0.30795	['chr1', 6887734, '+']	['chr1', 6887768, '+']
ENST00000482934	430	455	0.31058	['chr1', 6887875, '+']	['chr1', 6887900, '+']
ENST00000482934	458	487	0.2611	['chr1', 6887903, '+']	['chr1', 6887932, '+']
ENST00000482934	537	564	0.26565	['chr1', 6887982, '+']	['chr1', 6888009, '+']
ENST00000482934	576	650	0.3456	['chr1', 6888021, '+']	['chr1', 6888095, '+']
ENST00000482934	693	722	0.25829	['chr1', 6888138, '+']	['chr1', 6888167, '+']
ENST00000470648	134	159	0.26131	['chr1', 6853181, '+']	['chr1', 6871773, '+']
ENST00000470648	185	221	0.2506	['chr1', 6871799, '+']	['chr1', 6871835, '+']
ENST00000470648	261	281	0.24055	['chr1', 6887688, '+']	['chr1', 6887708, '+']
ENST00000470648	307	341	0.30795	['chr1', 6887734, '+']	['chr1', 6887768, '+']
ENST00000470648	448	473	0.31058	['chr1', 6887875, '+']	['chr1', 6887900, '+']
ENST00000470648	476	505	0.2611	['chr1', 6887903, '+']	['chr1', 6887932, '+']
ENST00000470648	555	582	0.26565	['chr1', 6887982, '+']	['chr1', 6888009, '+']
ENST00000470648	594	668	0.3456	['chr1', 6888021, '+']	['chr1', 6888095, '+']
ENST00000470648	711	745	0.30658	['chr1', 6888138, '+']	['chr1', 6888172, '+']
ENST00000461580	130	155	0.26131	['chr1', 6853181, '+']	['chr1', 6871773, '+']
ENST00000461580	181	217	0.2506	['chr1', 6871799, '+']	['chr1', 6871835, '+']
ENST00000461580	364	384	0.24055	['chr1', 6887688, '+']	['chr1', 6887708, '+']
ENST00000461580	410	444	0.30795	['chr1', 6887734, '+']	['chr1', 6887768, '+']
ENST00000461580	551	576	0.31058	['chr1', 6887875, '+']	['chr1', 6887900, '+']
ENST00000461580	579	608	0.2611	['chr1', 6887903, '+']	['chr1', 6887932, '+']
ENST00000461580	658	685	0.26565	['chr1', 6887982, '+']	['chr1', 6888009, '+']
ENST00000461580	697	771	0.3456	['chr1', 6888021, '+']	['chr1', 6888095, '+']
ENST00000472283	87	112	0.26131	['chr1', 6853181, '+']	['chr1', 6871773, '+']
ENST00000472283	138	174	0.2506	['chr1', 6871799, '+']	['chr1', 6871835, '+']
ENST00000472283	212	231	0.23709	['chr1', 6871873, '+']	['chr1', 6871892, '+']
ENST00000472283	234	263	0.2458	['chr1', 6871895, '+']	['chr1', 6871924, '+']
ENST00000054666	179	241	0.3713	['chr1', 7773503, '+']	['chr1', 7777213, '+']
ENST00000054666	261	297	0.31818	['chr1', 7777233, '+']	['chr1', 7777269, '+']
ENST00000054666	307	338	0.35109	['chr1', 7777279, '+']	['chr1', 7777310, '+']
ENST00000054666	407	461	0.31135	['chr1', 7779634, '+']	['chr1', 7779688, '+']
ENST00000054666	704	771	0.29637	['chr1', 7779931, '+']	['chr1', 7779998, '+']
ENST00000054666	834	905	0.29185	['chr1', 7780061, '+']	['chr1', 7780132, '+']
ENST00000054666	1061	1095	0.30279	['chr1', 7780288, '+']	['chr1', 7780322, '+']
ENST00000054666	1112	1162	0.293	['chr1', 7780339, '+']	['chr1', 7780389, '+']
ENST00000054666	1668	1708	0.27675	['chr1', 7780895, '+']	['chr1', 7780935, '+']
ENST00000054666	1727	1746	0.2356	['chr1', 7780954, '+']	['chr1', 7780973, '+']
ENST00000340305	114	148	0.26555	['chr1', 9589035, '+']	['chr1', 9595915, '+']
ENST00000340305	164	199	0.24125	['chr1', 9595931, '+']	['chr1', 9595966, '+']
ENST00000340305	207	259	0.28417	['chr1', 9595974, '+']	['chr1', 9596874, '+']
ENST00000340305	685	707	0.24415	['chr1', 9601174, '+']	['chr1', 9601196, '+']
ENST00000340305	994	1016	0.2333	['chr1', 9602097, '+']	['chr1', 9602119, '+']
ENST00000340305	1023	1044	0.24875	['chr1', 9602126, '+']	['chr1', 9602147, '+']
ENST00000340305	1196	1233	0.28705	['chr1', 9602299, '+']	['chr1', 9602336, '+']
ENST00000340305	2004	2044	0.24325	['chr1', 9603107, '+']	['chr1', 9603147, '+']
ENST00000340305	2076	2096	0.2364	['chr1', 9603179, '+']	['chr1', 9603199, '+']
ENST00000340305	2104	2126	0.2527	['chr1', 9603207, '+']	['chr1', 9603229, '+']
ENST00000340305	2311	2332	0.24305	['chr1', 9603414, '+']	['chr1', 9603435, '+']
ENST00000340305	2346	2375	0.29275	['chr1', 9603449, '+']	['chr1', 9603478, '+']
ENST00000340305	2411	2448	0.2887	['chr1', 9603514, '+']	['chr1', 9603551, '+']
ENST00000340305	2572	2593	0.23495	['chr1', 9603675, '+']	['chr1', 9603696, '+']
ENST00000340305	2764	2787	0.24755	['chr1', 9603867, '+']	['chr1', 9603890, '+']
ENST00000340305	3295	3349	0.29817	['chr1', 9604398, '+']	['chr1', 9604452, '+']
ENST00000340305	3679	3727	0.29735	['chr1', 9604782, '+']	['chr1', 9604830, '+']
ENST00000340305	3776	3817	0.34675	['chr1', 9604879, '+']	['chr1', 9604920, '+']
ENST00000340381	114	148	0.26555	['chr1', 9589035, '+']	['chr1', 9595915, '+']
ENST00000340381	164	199	0.24125	['chr1', 9595931, '+']	['chr1', 9595966, '+']
ENST00000340381	207	259	0.28417	['chr1', 9595974, '+']	['chr1', 9596874, '+']
ENST00000340381	685	707	0.24415	['chr1', 9601174, '+']	['chr1', 9601196, '+']
ENST00000340381	994	1016	0.2333	['chr1', 9602097, '+']	['chr1', 9602119, '+']
ENST00000340381	1023	1044	0.24875	['chr1', 9602126, '+']	['chr1', 9602147, '+']
ENST00000340381	1156	1175	0.23265	['chr1', 9602259, '+']	['chr1', 9607562, '+']
ENST00000340381	1187	1254	0.2741	['chr1', 9607574, '+']	['chr1', 9607641, '+']
ENST00000340381	1272	1342	0.33059	['chr1', 9607659, '+']	['chr1', 9607729, '+']
ENST00000340381	1360	1402	0.3346	['chr1', 9607747, '+']	['chr1', 9607789, '+']
ENST00000340381	1577	1615	0.33595	['chr1', 9610608, '+']	['chr1', 9610646, '+']
ENST00000340381	1674	1702	0.30718	['chr1', 9610705, '+']	['chr1', 9610733, '+']
ENST00000340381	1713	1751	0.2773	['chr1', 9610744, '+']	['chr1', 9610782, '+']
ENST00000340381	1781	1807	0.25115	['chr1', 9611759, '+']	['chr1', 9611785, '+']
ENST00000340381	1901	1937	0.26855	['chr1', 9611879, '+']	['chr1', 9613010, '+']
ENST00000340381	1943	2028	0.2705	['chr1', 9613016, '+']	['chr1', 9613101, '+']
ENST00000340381	2058	2078	0.2357	['chr1', 9613131, '+']	['chr1', 9613151, '+']
ENST00000340381	2649	2676	0.29309	['chr1', 9613722, '+']	['chr1', 9613749, '+']
ENST00000340381	2971	2999	0.2471	['chr1', 9614044, '+']	['chr1', 9614072, '+']
ENST00000340381	3110	3130	0.24927	['chr1', 9614183, '+']	['chr1', 9614203, '+']
ENST00000416541	404	426	0.24415	['chr1', 9601174, '+']	['chr1', 9601196, '+']
ENST00000416541	713	735	0.2333	['chr1', 9602097, '+']	['chr1', 9602119, '+']
ENST00000416541	742	763	0.24875	['chr1', 9602126, '+']	['chr1', 9602147, '+']
ENST00000416541	875	894	0.23265	['chr1', 9602259, '+']	['chr1', 9607562, '+']
ENST00000416541	906	973	0.2741	['chr1', 9607574, '+']	['chr1', 9607641, '+']
ENST00000416541	991	1061	0.33059	['chr1', 9607659, '+']	['chr1', 9607729, '+']
ENST00000416541	1079	1121	0.3346	['chr1', 9607747, '+']	['chr1', 9607789, '+']
ENST00000416541	1224	1262	0.33595	['chr1', 9610608, '+']	['chr1', 9610646, '+']
ENST00000416541	1321	1349	0.30718	['chr1', 9610705, '+']	['chr1', 9610733, '+']
ENST00000416541	1360	1398	0.2773	['chr1', 9610744, '+']	['chr1', 9610782, '+']
ENST00000416541	1428	1454	0.25115	['chr1', 9611759, '+']	['chr1', 9611785, '+']
ENST00000416541	1548	1584	0.26855	['chr1', 9611879, '+']	['chr1', 9613010, '+']
ENST00000416541	1590	1675	0.2705	['chr1', 9613016, '+']	['chr1', 9613101, '+']
ENST00000416541	1705	1725	0.2357	['chr1', 9613131, '+']	['chr1', 9613151, '+']
ENST00000416541	2296	2323	0.29309	['chr1', 9613722, '+']	['chr1', 9613749, '+']
ENST00000416541	2618	2646	0.2471	['chr1', 9614044, '+']	['chr1', 9614072, '+']
ENST00000416541	2757	2777	0.24927	['chr1', 9614183, '+']	['chr1', 9614203, '+']
ENST00000508400	20	62	0.3346	['chr1', 9607747, '+']	['chr1', 9607789, '+']
ENST00000508400	237	275	0.33595	['chr1', 9610608, '+']	['chr1', 9610646, '+']
ENST00000508400	334	362	0.30718	['chr1', 9610705, '+']	['chr1', 9610733, '+']
ENST00000508400	373	411	0.2773	['chr1', 9610744, '+']	['chr1', 9610782, '+']
ENST00000508400	500	526	0.25115	['chr1', 9611759, '+']	['chr1', 9611785, '+']
ENST00000508400	620	656	0.26855	['chr1', 9611879, '+']	['chr1', 9613010, '+']
ENST00000508400	662	747	0.2705	['chr1', 9613016, '+']	['chr1', 9613101, '+']
ENST00000508400	777	797	0.2357	['chr1', 9613131, '+']	['chr1', 9613151, '+']
ENST00000253251	559	595	0.26809	['chr1', 10033390, '+']	['chr1', 10033426, '+']
ENST00000253251	840	859	0.23145	['chr1', 10033671, '+']	['chr1', 10033690, '+']
ENST00000253251	962	986	0.24705	['chr1', 10072126, '+']	['chr1', 10072150, '+']
ENST00000253251	2668	2787	0.34865	['chr1', 10135178, '+']	['chr1', 10137177, '+']
ENST00000253251	2948	3010	0.33487	['chr1', 10146995, '+']	['chr1', 10147057, '+']
ENST00000253251	3168	3191	0.26173	['chr1', 10151351, '+']	['chr1', 10151374, '+']
ENST00000253251	3210	3236	0.26145	['chr1', 10151393, '+']	['chr1', 10151419, '+']
ENST00000253251	3310	3339	0.33136	['chr1', 10151493, '+']	['chr1', 10151522, '+']
ENST00000253251	3356	3406	0.2787	['chr1', 10151539, '+']	['chr1', 10158383, '+']
ENST00000253251	3597	3641	0.28895	['chr1', 10161233, '+']	['chr1', 10161277, '+']
ENST00000253251	4034	4071	0.28265	['chr1', 10178700, '+']	['chr1', 10178737, '+']
ENST00000253251	4181	4217	0.2753	['chr1', 10179444, '+']	['chr1', 10179480, '+']
ENST00000253251	4511	4543	0.26845	['chr1', 10180106, '+']	['chr1', 10180138, '+']
ENST00000253251	4625	4659	0.26655	['chr1', 10180220, '+']	['chr1', 10180254, '+']
ENST00000253251	4719	4751	0.296	['chr1', 10180314, '+']	['chr1', 10180346, '+']
ENST00000343090	76	95	0.23145	['chr1', 10033671, '+']	['chr1', 10033690, '+']
ENST00000343090	198	222	0.24705	['chr1', 10072126, '+']	['chr1', 10072150, '+']
ENST00000343090	2291	2410	0.34865	['chr1', 10135178, '+']	['chr1', 10137177, '+']
ENST00000343090	2571	2633	0.33487	['chr1', 10146995, '+']	['chr1', 10147057, '+']
ENST00000343090	2791	2814	0.26173	['chr1', 10151351, '+']	['chr1', 10151374, '+']
ENST00000343090	2833	2859	0.26145	['chr1', 10151393, '+']	['chr1', 10151419, '+']
ENST00000343090	2933	2962	0.33136	['chr1', 10151493, '+']	['chr1', 10151522, '+']
ENST00000343090	2979	3029	0.2787	['chr1', 10151539, '+']	['chr1', 10158383, '+']
ENST00000343090	3220	3264	0.28895	['chr1', 10161233, '+']	['chr1', 10161277, '+']
ENST00000343090	3657	3694	0.28265	['chr1', 10178700, '+']	['chr1', 10178737, '+']
ENST00000343090	3804	3840	0.2753	['chr1', 10179444, '+']	['chr1', 10179480, '+']
ENST00000343090	4134	4166	0.26845	['chr1', 10180106, '+']	['chr1', 10180138, '+']
ENST00000343090	4248	4282	0.26655	['chr1', 10180220, '+']	['chr1', 10180254, '+']
ENST00000343090	4342	4396	0.296	['chr1', 10180314, '+']	['chr1', 10180368, '+']
ENST00000343090	4449	4523	0.3299	['chr1', 10180421, '+']	['chr1', 10180495, '+']
ENST00000343090	4890	4936	0.36972	['chr1', 10180862, '+']	['chr1', 10180908, '+']
ENST00000343090	4950	5017	0.2821	['chr1', 10180922, '+']	['chr1', 10180989, '+']
ENST00000343090	5155	5175	0.23847	['chr1', 10181127, '+']	['chr1', 10181147, '+']
ENST00000488228	1	30	0.24127	['chr1', 10158354, '+']	['chr1', 10158383, '+']
ENST00000488228	221	265	0.28895	['chr1', 10161233, '+']	['chr1', 10161277, '+']
ENST00000487244	431	468	0.28265	['chr1', 10178700, '+']	['chr1', 10178737, '+']
ENST00000487244	578	614	0.2753	['chr1', 10179444, '+']	['chr1', 10179480, '+']
ENST00000465408	181	217	0.2753	['chr1', 10179444, '+']	['chr1', 10179480, '+']
ENST00000270776	1034	1054	0.24585	['chr1', 10417396, '+']	['chr1', 10417416, '+']
ENST00000483936	567	587	0.24585	['chr1', 10417396, '+']	['chr1', 10417416, '+']
ENST00000498356	253	273	0.24585	['chr1', 10417396, '+']	['chr1', 10417416, '+']
ENST00000602787	177	234	0.29577	['chr1', 10433884, '+']	['chr1', 10433941, '+']
ENST00000462462	152	207	0.27267	['chr1', 10431274, '+']	['chr1', 10431329, '+']
ENST00000356607	252	285	0.26905	['chr1', 10599240, '+']	['chr1', 10599273, '+']
ENST00000356607	848	867	0.23305	['chr1', 10629621, '+']	['chr1', 10629640, '+']
ENST00000356607	883	905	0.24035	['chr1', 10629656, '+']	['chr1', 10629678, '+']
ENST00000356607	1004	1039	0.267	['chr1', 10629777, '+']	['chr1', 10629812, '+']
ENST00000356607	1046	1099	0.2792	['chr1', 10629819, '+']	['chr1', 10629872, '+']
ENST00000356607	1191	1216	0.2711	['chr1', 10629964, '+']	['chr1', 10629989, '+']
ENST00000491661	157	190	0.26905	['chr1', 10599240, '+']	['chr1', 10599273, '+']
ENST00000473118	155	210	0.2867	['chr1', 11013785, '+']	['chr1', 11013840, '+']
ENST00000473118	236	285	0.33995	['chr1', 11013866, '+']	['chr1', 11013915, '+']
ENST00000473118	360	430	0.3441	['chr1', 11016868, '+']	['chr1', 11016938, '+']
ENST00000473118	642	678	0.27	['chr1', 11020430, '+']	['chr1', 11020466, '+']
ENST00000639083	127	182	0.2867	['chr1', 11013785, '+']	['chr1', 11013840, '+']
ENST00000639083	208	257	0.33995	['chr1', 11013866, '+']	['chr1', 11013915, '+']
ENST00000639083	332	402	0.3441	['chr1', 11016868, '+']	['chr1', 11016938, '+']
ENST00000639083	614	676	0.365	['chr1', 11020430, '+']	['chr1', 11020492, '+']
ENST00000639083	726	757	0.34618	['chr1', 11020542, '+']	['chr1', 11020573, '+']
ENST00000639083	782	881	0.3908	['chr1', 11020598, '+']	['chr1', 11022221, '+']
ENST00000639083	983	1017	0.2624	['chr1', 11022323, '+']	['chr1', 11022357, '+']
ENST00000639083	1186	1227	0.32276	['chr1', 11022526, '+']	['chr1', 11022567, '+']
ENST00000639083	1628	1695	0.33905	['chr1', 11022968, '+']	['chr1', 11023035, '+']
ENST00000639083	1906	1930	0.25415	['chr1', 11023246, '+']	['chr1', 11023270, '+']
ENST00000639599	252	307	0.2867	['chr1', 11013785, '+']	['chr1', 11013840, '+']
ENST00000639599	333	382	0.33995	['chr1', 11013866, '+']	['chr1', 11013915, '+']
ENST00000639599	457	527	0.3441	['chr1', 11016868, '+']	['chr1', 11016938, '+']
ENST00000639599	739	801	0.365	['chr1', 11020430, '+']	['chr1', 11020492, '+']
ENST00000639599	851	882	0.34618	['chr1', 11020542, '+']	['chr1', 11020573, '+']
ENST00000639599	907	1006	0.3908	['chr1', 11020598, '+']	['chr1', 11022221, '+']
ENST00000639599	1080	1104	0.25415	['chr1', 11023246, '+']	['chr1', 11023270, '+']
ENST00000629725	192	247	0.2867	['chr1', 11013785, '+']	['chr1', 11013840, '+']
ENST00000629725	273	322	0.33995	['chr1', 11013866, '+']	['chr1', 11013915, '+']
ENST00000629725	397	467	0.3441	['chr1', 11016868, '+']	['chr1', 11016938, '+']
ENST00000629725	679	741	0.365	['chr1', 11020430, '+']	['chr1', 11020492, '+']
ENST00000629725	791	822	0.34618	['chr1', 11020542, '+']	['chr1', 11020573, '+']
ENST00000629725	847	946	0.3908	['chr1', 11020598, '+']	['chr1', 11022221, '+']
ENST00000439080	161	216	0.2867	['chr1', 11013785, '+']	['chr1', 11013840, '+']
ENST00000439080	242	291	0.33995	['chr1', 11013866, '+']	['chr1', 11013915, '+']
ENST00000439080	484	546	0.365	['chr1', 11020430, '+']	['chr1', 11020492, '+']
ENST00000439080	596	627	0.34618	['chr1', 11020542, '+']	['chr1', 11020573, '+']
ENST00000439080	652	751	0.3908	['chr1', 11020598, '+']	['chr1', 11022221, '+']
ENST00000439080	853	887	0.2624	['chr1', 11022323, '+']	['chr1', 11022357, '+']
ENST00000439080	1056	1097	0.32276	['chr1', 11022526, '+']	['chr1', 11022567, '+']
ENST00000613864	160	215	0.2867	['chr1', 11013785, '+']	['chr1', 11013840, '+']
ENST00000613864	241	290	0.33995	['chr1', 11013866, '+']	['chr1', 11013915, '+']
ENST00000613864	365	435	0.3441	['chr1', 11016868, '+']	['chr1', 11016938, '+']
ENST00000476201	160	215	0.2867	['chr1', 11013785, '+']	['chr1', 11013840, '+']
ENST00000476201	241	290	0.33995	['chr1', 11013866, '+']	['chr1', 11013915, '+']
ENST00000476201	488	558	0.3441	['chr1', 11016868, '+']	['chr1', 11016938, '+']
ENST00000476201	770	832	0.365	['chr1', 11020430, '+']	['chr1', 11020492, '+']
ENST00000472476	160	215	0.2867	['chr1', 11013785, '+']	['chr1', 11013840, '+']
ENST00000472476	241	290	0.33995	['chr1', 11013866, '+']	['chr1', 11013915, '+']
ENST00000472476	497	567	0.3441	['chr1', 11016868, '+']	['chr1', 11016938, '+']
ENST00000472476	779	841	0.365	['chr1', 11020430, '+']	['chr1', 11020492, '+']
ENST00000472476	891	922	0.34618	['chr1', 11020542, '+']	['chr1', 11020573, '+']
ENST00000472476	947	980	0.30018	['chr1', 11020598, '+']	['chr1', 11022155, '+']
ENST00000621715	144	199	0.2867	['chr1', 11013785, '+']	['chr1', 11013840, '+']
ENST00000621715	225	274	0.33995	['chr1', 11013866, '+']	['chr1', 11013915, '+']
ENST00000621715	349	419	0.3441	['chr1', 11016868, '+']	['chr1', 11016938, '+']
ENST00000621715	628	727	0.3908	['chr1', 11018872, '+']	['chr1', 11022221, '+']
ENST00000315091	70	125	0.2867	['chr1', 11013785, '+']	['chr1', 11013840, '+']
ENST00000315091	151	200	0.33995	['chr1', 11013866, '+']	['chr1', 11013915, '+']
ENST00000315091	275	345	0.3441	['chr1', 11016868, '+']	['chr1', 11016938, '+']
ENST00000315091	557	619	0.365	['chr1', 11020430, '+']	['chr1', 11020492, '+']
ENST00000315091	669	700	0.34618	['chr1', 11020542, '+']	['chr1', 11020573, '+']
ENST00000315091	725	824	0.3908	['chr1', 11020598, '+']	['chr1', 11022221, '+']
ENST00000315091	898	922	0.25415	['chr1', 11023246, '+']	['chr1', 11023270, '+']
ENST00000315091	1553	1577	0.27991	['chr1', 11023901, '+']	['chr1', 11023925, '+']
ENST00000638264	58	113	0.2867	['chr1', 11013785, '+']	['chr1', 11013840, '+']
ENST00000638264	139	188	0.33995	['chr1', 11013866, '+']	['chr1', 11013915, '+']
ENST00000638264	300	331	0.34618	['chr1', 11020542, '+']	['chr1', 11020573, '+']
ENST00000638264	356	455	0.3908	['chr1', 11020598, '+']	['chr1', 11022221, '+']
ENST00000638264	649	690	0.32276	['chr1', 11022526, '+']	['chr1', 11022567, '+']
ENST00000616545	58	113	0.2867	['chr1', 11013785, '+']	['chr1', 11013840, '+']
ENST00000616545	139	188	0.33995	['chr1', 11013866, '+']	['chr1', 11013915, '+']
ENST00000616545	263	333	0.3441	['chr1', 11016868, '+']	['chr1', 11016938, '+']
ENST00000616545	545	607	0.365	['chr1', 11020430, '+']	['chr1', 11020492, '+']
ENST00000616545	657	688	0.34618	['chr1', 11020542, '+']	['chr1', 11020573, '+']
ENST00000616545	713	812	0.3908	['chr1', 11020598, '+']	['chr1', 11022221, '+']
ENST00000616545	833	855	0.25055	['chr1', 11022242, '+']	['chr1', 11023276, '+']
ENST00000621790	58	113	0.2867	['chr1', 11013785, '+']	['chr1', 11013840, '+']
ENST00000621790	139	188	0.33995	['chr1', 11013866, '+']	['chr1', 11013915, '+']
ENST00000621790	263	333	0.3441	['chr1', 11016868, '+']	['chr1', 11016938, '+']
ENST00000621790	545	607	0.365	['chr1', 11020430, '+']	['chr1', 11020492, '+']
ENST00000621790	657	688	0.34618	['chr1', 11020542, '+']	['chr1', 11020573, '+']
ENST00000621790	713	812	0.3908	['chr1', 11020598, '+']	['chr1', 11022221, '+']
ENST00000621790	913	937	0.25415	['chr1', 11023246, '+']	['chr1', 11023270, '+']
ENST00000622057	10	80	0.3441	['chr1', 11016868, '+']	['chr1', 11016938, '+']
ENST00000622057	292	354	0.365	['chr1', 11020430, '+']	['chr1', 11020492, '+']
ENST00000622057	404	435	0.34618	['chr1', 11020542, '+']	['chr1', 11020573, '+']
ENST00000622057	460	559	0.3908	['chr1', 11020598, '+']	['chr1', 11022221, '+']
ENST00000622057	662	685	0.27517	['chr1', 11023243, '+']	['chr1', 11023266, '+']
ENST00000617172	4	74	0.3441	['chr1', 11016868, '+']	['chr1', 11016938, '+']
ENST00000617172	286	348	0.365	['chr1', 11020430, '+']	['chr1', 11020492, '+']
ENST00000617172	398	429	0.34618	['chr1', 11020542, '+']	['chr1', 11020573, '+']
ENST00000617172	454	553	0.3908	['chr1', 11020598, '+']	['chr1', 11022221, '+']
ENST00000617172	636	660	0.25415	['chr1', 11023246, '+']	['chr1', 11023270, '+']
ENST00000611963	185	247	0.365	['chr1', 11020430, '+']	['chr1', 11020492, '+']
ENST00000611963	297	328	0.34618	['chr1', 11020542, '+']	['chr1', 11020573, '+']
ENST00000611963	353	452	0.3908	['chr1', 11020598, '+']	['chr1', 11022221, '+']
ENST00000611963	526	550	0.25415	['chr1', 11023246, '+']	['chr1', 11023270, '+']
ENST00000620632	96	158	0.365	['chr1', 11020430, '+']	['chr1', 11020492, '+']
ENST00000620632	208	239	0.34618	['chr1', 11020542, '+']	['chr1', 11020573, '+']
ENST00000620632	264	363	0.3908	['chr1', 11020598, '+']	['chr1', 11022221, '+']
ENST00000620632	446	470	0.25415	['chr1', 11023246, '+']	['chr1', 11023270, '+']
ENST00000620632	564	588	0.27991	['chr1', 11023901, '+']	['chr1', 11023925, '+']
ENST00000619555	96	158	0.365	['chr1', 11020430, '+']	['chr1', 11020492, '+']
ENST00000619555	208	239	0.34618	['chr1', 11020542, '+']	['chr1', 11020573, '+']
ENST00000619555	264	363	0.3908	['chr1', 11020598, '+']	['chr1', 11022221, '+']
ENST00000619555	478	502	0.25415	['chr1', 11023246, '+']	['chr1', 11023270, '+']
ENST00000614494	1	60	0.365	['chr1', 11020433, '+']	['chr1', 11020492, '+']
ENST00000614494	110	141	0.34618	['chr1', 11020542, '+']	['chr1', 11020573, '+']
ENST00000614494	166	230	0.3908	['chr1', 11020598, '+']	['chr1', 11023164, '+']
ENST00000614494	312	336	0.25415	['chr1', 11023246, '+']	['chr1', 11023270, '+']
ENST00000477447	12	111	0.3908	['chr1', 11020598, '+']	['chr1', 11022221, '+']
ENST00000477447	194	218	0.25415	['chr1', 11023246, '+']	['chr1', 11023270, '+']
ENST00000477447	347	380	0.52093	['chr1', 11025145, '+']	['chr1', 11025178, '+']
ENST00000620505	16	50	0.2624	['chr1', 11022323, '+']	['chr1', 11022357, '+']
ENST00000620505	219	260	0.32276	['chr1', 11022526, '+']	['chr1', 11022567, '+']
ENST00000620505	462	486	0.25415	['chr1', 11023246, '+']	['chr1', 11023270, '+']
ENST00000620505	581	614	0.52093	['chr1', 11025145, '+']	['chr1', 11025178, '+']
ENST00000613177	202	226	0.25415	['chr1', 11023246, '+']	['chr1', 11023270, '+']
ENST00000613177	321	354	0.52093	['chr1', 11025145, '+']	['chr1', 11025178, '+']
ENST00000251546	377	409	0.24495	['chr1', 11655975, '+']	['chr1', 11656007, '+']
ENST00000251546	736	768	0.28158	['chr1', 11658871, '+']	['chr1', 11661161, '+']
ENST00000251546	999	1050	0.2866	['chr1', 11661392, '+']	['chr1', 11661443, '+']
ENST00000251546	1136	1156	0.23345	['chr1', 11661529, '+']	['chr1', 11661549, '+']
ENST00000251546	1173	1206	0.24385	['chr1', 11661566, '+']	['chr1', 11661599, '+']
ENST00000251546	1223	1260	0.30635	['chr1', 11661616, '+']	['chr1', 11661653, '+']
ENST00000251546	1419	1446	0.276	['chr1', 11661812, '+']	['chr1', 11661839, '+']
ENST00000251546	1484	1520	0.33462	['chr1', 11661877, '+']	['chr1', 11661913, '+']
ENST00000251546	1535	1557	0.2345	['chr1', 11661928, '+']	['chr1', 11661950, '+']
ENST00000376768	242	274	0.24495	['chr1', 11655975, '+']	['chr1', 11656007, '+']
ENST00000376768	697	729	0.28158	['chr1', 11658871, '+']	['chr1', 11661161, '+']
ENST00000251547	222	254	0.24495	['chr1', 11655975, '+']	['chr1', 11656007, '+']
ENST00000251547	706	738	0.28158	['chr1', 11658871, '+']	['chr1', 11661161, '+']
ENST00000251547	969	1020	0.2866	['chr1', 11661392, '+']	['chr1', 11661443, '+']
ENST00000251547	1106	1126	0.23345	['chr1', 11661529, '+']	['chr1', 11661549, '+']
ENST00000251547	1143	1176	0.24385	['chr1', 11661566, '+']	['chr1', 11661599, '+']
ENST00000251547	1193	1230	0.30635	['chr1', 11661616, '+']	['chr1', 11661653, '+']
ENST00000251547	1389	1416	0.276	['chr1', 11661812, '+']	['chr1', 11661839, '+']
ENST00000251547	1454	1490	0.33462	['chr1', 11661877, '+']	['chr1', 11661913, '+']
ENST00000251547	1505	1527	0.2345	['chr1', 11661928, '+']	['chr1', 11661950, '+']
ENST00000376760	243	275	0.24495	['chr1', 11655975, '+']	['chr1', 11656007, '+']
ENST00000376760	602	634	0.28158	['chr1', 11658871, '+']	['chr1', 11661161, '+']
ENST00000376762	213	245	0.24495	['chr1', 11655975, '+']	['chr1', 11656007, '+']
ENST00000376762	572	604	0.28158	['chr1', 11658871, '+']	['chr1', 11661161, '+']
ENST00000376762	835	886	0.2866	['chr1', 11661392, '+']	['chr1', 11661443, '+']
ENST00000376762	972	992	0.23345	['chr1', 11661529, '+']	['chr1', 11661549, '+']
ENST00000376762	1009	1042	0.24385	['chr1', 11661566, '+']	['chr1', 11661599, '+']
ENST00000376762	1059	1096	0.30635	['chr1', 11661616, '+']	['chr1', 11661653, '+']
ENST00000376762	1255	1282	0.276	['chr1', 11661812, '+']	['chr1', 11661839, '+']
ENST00000376762	1320	1356	0.33462	['chr1', 11661877, '+']	['chr1', 11661913, '+']
ENST00000376762	1371	1393	0.2345	['chr1', 11661928, '+']	['chr1', 11661950, '+']
ENST00000475435	270	302	0.28158	['chr1', 11658871, '+']	['chr1', 11661161, '+']
ENST00000471895	223	255	0.28158	['chr1', 11658871, '+']	['chr1', 11661161, '+']
ENST00000485046	240	272	0.25345	['chr1', 11949801, '+']	['chr1', 11949833, '+']
ENST00000485046	282	330	0.27795	['chr1', 11949843, '+']	['chr1', 11949891, '+']
ENST00000485046	518	552	0.25755	['chr1', 11952631, '+']	['chr1', 11952665, '+']
ENST00000485046	776	828	0.313	['chr1', 11957006, '+']	['chr1', 11957885, '+']
ENST00000449038	28	49	0.25109	['chr1', 11934721, '+']	['chr1', 11934742, '+']
ENST00000449038	424	456	0.25345	['chr1', 11949801, '+']	['chr1', 11949833, '+']
ENST00000449038	466	514	0.27795	['chr1', 11949843, '+']	['chr1', 11949891, '+']
ENST00000449038	702	741	0.25755	['chr1', 11952631, '+']	['chr1', 11952670, '+']
ENST00000358133	243	275	0.25345	['chr1', 11949801, '+']	['chr1', 11949833, '+']
ENST00000358133	285	333	0.27795	['chr1', 11949843, '+']	['chr1', 11949891, '+']
ENST00000358133	521	555	0.25755	['chr1', 11952631, '+']	['chr1', 11952665, '+']
ENST00000429000	234	266	0.25345	['chr1', 11949801, '+']	['chr1', 11949833, '+']
ENST00000429000	276	324	0.27795	['chr1', 11949843, '+']	['chr1', 11949891, '+']
ENST00000429000	512	546	0.25755	['chr1', 11952631, '+']	['chr1', 11952665, '+']
ENST00000429000	776	828	0.313	['chr1', 11957185, '+']	['chr1', 11957885, '+']
ENST00000196061	224	256	0.25345	['chr1', 11949801, '+']	['chr1', 11949833, '+']
ENST00000196061	266	314	0.27795	['chr1', 11949843, '+']	['chr1', 11949891, '+']
ENST00000196061	502	536	0.25755	['chr1', 11952631, '+']	['chr1', 11952665, '+']
ENST00000196061	760	812	0.313	['chr1', 11957006, '+']	['chr1', 11957885, '+']
ENST00000196061	2195	2225	0.25275	['chr1', 11974792, '+']	['chr1', 11974822, '+']
ENST00000465920	683	735	0.313	['chr1', 11957006, '+']	['chr1', 11957885, '+']
ENST00000481933	1595	1625	0.25275	['chr1', 11974792, '+']	['chr1', 11974822, '+']
ENST00000444836	340	371	0.259	['chr1', 11989200, '+']	['chr1', 11989231, '+']
ENST00000444836	506	539	0.2585	['chr1', 11992577, '+']	['chr1', 11992610, '+']
ENST00000444836	637	675	0.2805	['chr1', 11996173, '+']	['chr1', 11996211, '+']
ENST00000444836	724	751	0.25025	['chr1', 11996260, '+']	['chr1', 11996287, '+']
ENST00000444836	962	1040	0.35873	['chr1', 11998824, '+']	['chr1', 11999011, '+']
ENST00000444836	1060	1098	0.2965	['chr1', 11999031, '+']	['chr1', 11999069, '+']
ENST00000444836	1103	1128	0.24624	['chr1', 11999074, '+']	['chr1', 12001404, '+']
ENST00000444836	1179	1205	0.24755	['chr1', 12001455, '+']	['chr1', 12001481, '+']
ENST00000444836	1340	1420	0.31285	['chr1', 12001830, '+']	['chr1', 12002055, '+']
ENST00000444836	1600	1629	0.26981	['chr1', 12004513, '+']	['chr1', 12004542, '+']
ENST00000444836	1713	1748	0.2572	['chr1', 12004837, '+']	['chr1', 12004872, '+']
ENST00000444836	1828	1857	0.28225	['chr1', 12005735, '+']	['chr1', 12005764, '+']
ENST00000444836	2028	2124	0.3918	['chr1', 12006541, '+']	['chr1', 12006637, '+']
ENST00000444836	2286	2317	0.2906	['chr1', 12007158, '+']	['chr1', 12007189, '+']
ENST00000444836	2323	2355	0.27915	['chr1', 12007195, '+']	['chr1', 12007227, '+']
ENST00000444836	2383	2434	0.2799	['chr1', 12009597, '+']	['chr1', 12009648, '+']
ENST00000444836	2904	2952	0.30955	['chr1', 12011887, '+']	['chr1', 12011935, '+']
ENST00000444836	3048	3083	0.29895	['chr1', 12012031, '+']	['chr1', 12012066, '+']
ENST00000444836	3322	3341	0.2341	['chr1', 12012305, '+']	['chr1', 12012324, '+']
ENST00000444836	3482	3504	0.2363	['chr1', 12012465, '+']	['chr1', 12012487, '+']
ENST00000444836	4380	4399	0.23165	['chr1', 12013363, '+']	['chr1', 12013382, '+']
ENST00000444836	4436	4474	0.3373	['chr1', 12013419, '+']	['chr1', 12013457, '+']
ENST00000235329	178	209	0.27405	['chr1', 11981974, '+']	['chr1', 11982005, '+']
ENST00000235329	233	314	0.3135	['chr1', 11982029, '+']	['chr1', 11982110, '+']
ENST00000235329	354	385	0.259	['chr1', 11989200, '+']	['chr1', 11989231, '+']
ENST00000235329	520	553	0.2585	['chr1', 11992577, '+']	['chr1', 11992610, '+']
ENST00000235329	651	689	0.2805	['chr1', 11996173, '+']	['chr1', 11996211, '+']
ENST00000235329	738	765	0.25025	['chr1', 11996260, '+']	['chr1', 11996287, '+']
ENST00000235329	976	1054	0.35873	['chr1', 11998824, '+']	['chr1', 11999011, '+']
ENST00000235329	1074	1112	0.2965	['chr1', 11999031, '+']	['chr1', 11999069, '+']
ENST00000235329	1117	1142	0.24624	['chr1', 11999074, '+']	['chr1', 12001404, '+']
ENST00000235329	1193	1219	0.24755	['chr1', 12001455, '+']	['chr1', 12001481, '+']
ENST00000235329	1354	1434	0.31285	['chr1', 12001830, '+']	['chr1', 12002055, '+']
ENST00000235329	1614	1643	0.26981	['chr1', 12004513, '+']	['chr1', 12004542, '+']
ENST00000235329	1727	1762	0.2572	['chr1', 12004837, '+']	['chr1', 12004872, '+']
ENST00000235329	1842	1871	0.28225	['chr1', 12005735, '+']	['chr1', 12005764, '+']
ENST00000235329	2042	2138	0.3918	['chr1', 12006541, '+']	['chr1', 12006637, '+']
ENST00000235329	2300	2331	0.2906	['chr1', 12007158, '+']	['chr1', 12007189, '+']
ENST00000235329	2337	2369	0.27915	['chr1', 12007195, '+']	['chr1', 12007227, '+']
ENST00000235329	2397	2448	0.2799	['chr1', 12009597, '+']	['chr1', 12009648, '+']
ENST00000235329	2918	2966	0.30955	['chr1', 12011887, '+']	['chr1', 12011935, '+']
ENST00000235329	3062	3097	0.29895	['chr1', 12012031, '+']	['chr1', 12012066, '+']
ENST00000235329	3336	3355	0.2341	['chr1', 12012305, '+']	['chr1', 12012324, '+']
ENST00000235329	3496	3518	0.2363	['chr1', 12012465, '+']	['chr1', 12012487, '+']
ENST00000235329	4394	4413	0.23165	['chr1', 12013363, '+']	['chr1', 12013382, '+']
ENST00000235329	4450	4488	0.3373	['chr1', 12013419, '+']	['chr1', 12013457, '+']
ENST00000484391	151	182	0.259	['chr1', 11989200, '+']	['chr1', 11989231, '+']
ENST00000497302	55	86	0.27405	['chr1', 11981974, '+']	['chr1', 11982005, '+']
ENST00000497302	110	191	0.3135	['chr1', 11982029, '+']	['chr1', 11982110, '+']
ENST00000497302	231	262	0.259	['chr1', 11989200, '+']	['chr1', 11989231, '+']
ENST00000497302	582	615	0.2585	['chr1', 11992577, '+']	['chr1', 11992610, '+']
ENST00000412236	38	119	0.3135	['chr1', 11982029, '+']	['chr1', 11982110, '+']
ENST00000412236	227	258	0.259	['chr1', 11989200, '+']	['chr1', 11989231, '+']
ENST00000412236	393	426	0.2585	['chr1', 11992577, '+']	['chr1', 11992610, '+']
ENST00000478749	139	158	0.24075	['chr1', 12022146, '+']	['chr1', 12022165, '+']
ENST00000235332	79	99	0.25391	['chr1', 12019544, '+']	['chr1', 12021656, '+']
ENST00000235332	205	228	0.241	['chr1', 12021762, '+']	['chr1', 12021785, '+']
ENST00000235332	335	354	0.24075	['chr1', 12022146, '+']	['chr1', 12022165, '+']
ENST00000235332	1066	1102	0.2625	['chr1', 12030079, '+']	['chr1', 12030115, '+']
ENST00000235332	1528	1552	0.24445	['chr1', 12032000, '+']	['chr1', 12032024, '+']
ENST00000466860	1272	1308	0.2625	['chr1', 12030079, '+']	['chr1', 12030115, '+']
ENST00000498685	887	923	0.2625	['chr1', 12030079, '+']	['chr1', 12030115, '+']
ENST00000498685	1347	1371	0.27208	['chr1', 12031998, '+']	['chr1', 12032022, '+']
ENST00000460823	287	323	0.2625	['chr1', 12030079, '+']	['chr1', 12030115, '+']
ENST00000294489	650	683	0.2957	['chr1', 13607186, '+']	['chr1', 13607219, '+']
ENST00000294489	690	711	0.2415	['chr1', 13607226, '+']	['chr1', 13607247, '+']
ENST00000294489	762	817	0.25395	['chr1', 13607298, '+']	['chr1', 13610433, '+']
ENST00000294489	1299	1320	0.2465	['chr1', 13616152, '+']	['chr1', 13616173, '+']
ENST00000294489	1339	1361	0.232	['chr1', 13616192, '+']	['chr1', 13616214, '+']
ENST00000294489	1421	1451	0.33282	['chr1', 13616274, '+']	['chr1', 13616304, '+']
ENST00000294489	1472	1513	0.32275	['chr1', 13616325, '+']	['chr1', 13616366, '+']
ENST00000294489	1594	1621	0.29227	['chr1', 13616447, '+']	['chr1', 13616474, '+']
ENST00000294489	1710	1737	0.26805	['chr1', 13616563, '+']	['chr1', 13616590, '+']
ENST00000294489	1869	1901	0.25395	['chr1', 13616722, '+']	['chr1', 13616754, '+']
ENST00000294489	1935	1969	0.28635	['chr1', 13616788, '+']	['chr1', 13616822, '+']
ENST00000294489	2497	2520	0.28609	['chr1', 13617350, '+']	['chr1', 13617373, '+']
ENST00000294489	2523	2568	0.3844	['chr1', 13617376, '+']	['chr1', 13617421, '+']
ENST00000294489	2815	2835	0.253	['chr1', 13617668, '+']	['chr1', 13617688, '+']
ENST00000294489	2940	2962	0.26373	['chr1', 13617793, '+']	['chr1', 13617815, '+']
ENST00000617617	358	391	0.2957	['chr1', 13607186, '+']	['chr1', 13607219, '+']
ENST00000617617	398	419	0.2415	['chr1', 13607226, '+']	['chr1', 13607247, '+']
ENST00000617617	470	525	0.25395	['chr1', 13607298, '+']	['chr1', 13610433, '+']
ENST00000617617	1007	1028	0.2465	['chr1', 13616152, '+']	['chr1', 13616173, '+']
ENST00000617617	1047	1069	0.232	['chr1', 13616192, '+']	['chr1', 13616214, '+']
ENST00000617617	1129	1159	0.33282	['chr1', 13616274, '+']	['chr1', 13616304, '+']
ENST00000617617	1180	1221	0.32275	['chr1', 13616325, '+']	['chr1', 13616366, '+']
ENST00000617617	1302	1329	0.29227	['chr1', 13616447, '+']	['chr1', 13616474, '+']
ENST00000617617	1418	1445	0.26805	['chr1', 13616563, '+']	['chr1', 13616590, '+']
ENST00000617617	1577	1609	0.25395	['chr1', 13616722, '+']	['chr1', 13616754, '+']
ENST00000617617	1643	1677	0.28635	['chr1', 13616788, '+']	['chr1', 13616822, '+']
ENST00000617617	2205	2228	0.28609	['chr1', 13617350, '+']	['chr1', 13617373, '+']
ENST00000617617	2231	2276	0.3844	['chr1', 13617376, '+']	['chr1', 13617421, '+']
ENST00000617617	2523	2543	0.253	['chr1', 13617668, '+']	['chr1', 13617688, '+']
ENST00000617617	2648	2670	0.26373	['chr1', 13617793, '+']	['chr1', 13617815, '+']
ENST00000376057	353	386	0.2957	['chr1', 13607186, '+']	['chr1', 13607219, '+']
ENST00000376057	393	414	0.2415	['chr1', 13607226, '+']	['chr1', 13607247, '+']
ENST00000376057	465	520	0.25395	['chr1', 13607298, '+']	['chr1', 13610433, '+']
ENST00000376057	996	1017	0.2465	['chr1', 13616152, '+']	['chr1', 13616173, '+']
ENST00000376057	1036	1058	0.232	['chr1', 13616192, '+']	['chr1', 13616214, '+']
ENST00000376057	1118	1148	0.33282	['chr1', 13616274, '+']	['chr1', 13616304, '+']
ENST00000376057	1169	1210	0.32275	['chr1', 13616325, '+']	['chr1', 13616366, '+']
ENST00000376057	1291	1318	0.29227	['chr1', 13616447, '+']	['chr1', 13616474, '+']
ENST00000376057	1407	1434	0.26805	['chr1', 13616563, '+']	['chr1', 13616590, '+']
ENST00000376057	1566	1598	0.25395	['chr1', 13616722, '+']	['chr1', 13616754, '+']
ENST00000376057	1632	1666	0.28635	['chr1', 13616788, '+']	['chr1', 13616822, '+']
ENST00000376057	2194	2217	0.28609	['chr1', 13617350, '+']	['chr1', 13617373, '+']
ENST00000376057	2220	2265	0.3844	['chr1', 13617376, '+']	['chr1', 13617421, '+']
ENST00000376057	2512	2532	0.253	['chr1', 13617668, '+']	['chr1', 13617688, '+']
ENST00000376057	2637	2659	0.26373	['chr1', 13617793, '+']	['chr1', 13617815, '+']
ENST00000621990	284	317	0.2957	['chr1', 13607186, '+']	['chr1', 13607219, '+']
ENST00000621990	324	345	0.2415	['chr1', 13607226, '+']	['chr1', 13607247, '+']
ENST00000621990	396	451	0.25395	['chr1', 13607298, '+']	['chr1', 13610433, '+']
ENST00000621990	933	954	0.2465	['chr1', 13616152, '+']	['chr1', 13616173, '+']
ENST00000621990	973	995	0.232	['chr1', 13616192, '+']	['chr1', 13616214, '+']
ENST00000621990	1055	1085	0.33282	['chr1', 13616274, '+']	['chr1', 13616304, '+']
ENST00000621990	1106	1147	0.32275	['chr1', 13616325, '+']	['chr1', 13616366, '+']
ENST00000621990	1228	1255	0.29227	['chr1', 13616447, '+']	['chr1', 13616474, '+']
ENST00000621990	1344	1371	0.26805	['chr1', 13616563, '+']	['chr1', 13616590, '+']
ENST00000621990	1503	1535	0.25395	['chr1', 13616722, '+']	['chr1', 13616754, '+']
ENST00000621990	1569	1603	0.28635	['chr1', 13616788, '+']	['chr1', 13616822, '+']
ENST00000621990	2131	2154	0.28609	['chr1', 13617350, '+']	['chr1', 13617373, '+']
ENST00000621990	2157	2202	0.3844	['chr1', 13617376, '+']	['chr1', 13617421, '+']
ENST00000621990	2449	2469	0.253	['chr1', 13617668, '+']	['chr1', 13617688, '+']
ENST00000621990	2574	2596	0.26373	['chr1', 13617793, '+']	['chr1', 13617815, '+']
ENST00000510906	282	315	0.2957	['chr1', 13607186, '+']	['chr1', 13607219, '+']
ENST00000510906	322	343	0.2415	['chr1', 13607226, '+']	['chr1', 13607247, '+']
ENST00000510906	394	449	0.25395	['chr1', 13607298, '+']	['chr1', 13610433, '+']
ENST00000509009	110	143	0.2957	['chr1', 13607186, '+']	['chr1', 13607219, '+']
ENST00000509009	150	171	0.2415	['chr1', 13607226, '+']	['chr1', 13607247, '+']
ENST00000509009	222	277	0.25395	['chr1', 13607298, '+']	['chr1', 13610433, '+']
ENST00000376061	89	122	0.2957	['chr1', 13607186, '+']	['chr1', 13607219, '+']
ENST00000376061	129	150	0.2415	['chr1', 13607226, '+']	['chr1', 13607247, '+']
ENST00000376061	201	256	0.25395	['chr1', 13607298, '+']	['chr1', 13610433, '+']
ENST00000376061	738	759	0.2465	['chr1', 13616152, '+']	['chr1', 13616173, '+']
ENST00000376061	778	800	0.232	['chr1', 13616192, '+']	['chr1', 13616214, '+']
ENST00000376061	860	890	0.33282	['chr1', 13616274, '+']	['chr1', 13616304, '+']
ENST00000376061	911	952	0.32275	['chr1', 13616325, '+']	['chr1', 13616366, '+']
ENST00000376061	1033	1060	0.29227	['chr1', 13616447, '+']	['chr1', 13616474, '+']
ENST00000376061	1149	1176	0.26805	['chr1', 13616563, '+']	['chr1', 13616590, '+']
ENST00000376061	1308	1341	0.25395	['chr1', 13616722, '+']	['chr1', 13616755, '+']
ENST00000513143	244	277	0.2957	['chr1', 13607186, '+']	['chr1', 13607219, '+']
ENST00000513143	284	305	0.2415	['chr1', 13607226, '+']	['chr1', 13607247, '+']
ENST00000513143	356	411	0.25395	['chr1', 13607298, '+']	['chr1', 13610433, '+']
ENST00000513143	893	914	0.2465	['chr1', 13616152, '+']	['chr1', 13616173, '+']
ENST00000513143	933	955	0.232	['chr1', 13616192, '+']	['chr1', 13616214, '+']
ENST00000513143	1015	1045	0.33282	['chr1', 13616274, '+']	['chr1', 13616304, '+']
ENST00000513143	1066	1107	0.32275	['chr1', 13616325, '+']	['chr1', 13616366, '+']
ENST00000513143	1188	1215	0.29227	['chr1', 13616447, '+']	['chr1', 13616474, '+']
ENST00000487038	193	226	0.2957	['chr1', 13607186, '+']	['chr1', 13607219, '+']
ENST00000487038	233	254	0.2415	['chr1', 13607226, '+']	['chr1', 13607247, '+']
ENST00000487038	305	360	0.25395	['chr1', 13607298, '+']	['chr1', 13610433, '+']
ENST00000475043	111	144	0.2957	['chr1', 13607186, '+']	['chr1', 13607219, '+']
ENST00000475043	151	172	0.2415	['chr1', 13607226, '+']	['chr1', 13607247, '+']
ENST00000475043	223	278	0.25395	['chr1', 13607298, '+']	['chr1', 13610433, '+']
ENST00000475043	754	775	0.2465	['chr1', 13616152, '+']	['chr1', 13616173, '+']
ENST00000475043	794	816	0.232	['chr1', 13616192, '+']	['chr1', 13616214, '+']
ENST00000488631	174	207	0.2957	['chr1', 13607186, '+']	['chr1', 13607219, '+']
ENST00000488631	214	235	0.2415	['chr1', 13607226, '+']	['chr1', 13607247, '+']
ENST00000488631	687	708	0.2465	['chr1', 13616152, '+']	['chr1', 13616173, '+']
ENST00000488631	727	749	0.232	['chr1', 13616192, '+']	['chr1', 13616214, '+']
ENST00000375980	388	409	0.24195	['chr1', 15425873, '+']	['chr1', 15425894, '+']
ENST00000375980	413	457	0.289	['chr1', 15425898, '+']	['chr1', 15425942, '+']
ENST00000375980	660	688	0.255	['chr1', 15427276, '+']	['chr1', 15428612, '+']
ENST00000375980	907	927	0.23615	['chr1', 15428831, '+']	['chr1', 15428851, '+']
ENST00000375980	2252	2284	0.30027	['chr1', 15430176, '+']	['chr1', 15430208, '+']
ENST00000445566	18	39	0.24195	['chr1', 15425873, '+']	['chr1', 15425894, '+']
ENST00000445566	43	87	0.289	['chr1', 15425898, '+']	['chr1', 15425942, '+']
ENST00000445566	402	430	0.255	['chr1', 15428001, '+']	['chr1', 15428612, '+']
ENST00000445566	649	669	0.23615	['chr1', 15428831, '+']	['chr1', 15428851, '+']
ENST00000375799	684	711	0.27836	['chr1', 15718617, '+']	['chr1', 15719752, '+']
ENST00000375799	715	748	0.26245	['chr1', 15719756, '+']	['chr1', 15719789, '+']
ENST00000375799	818	845	0.26265	['chr1', 15719859, '+']	['chr1', 15719886, '+']
ENST00000375799	1174	1212	0.28915	['chr1', 15727019, '+']	['chr1', 15727057, '+']
ENST00000375799	1415	1443	0.2574	['chr1', 15727260, '+']	['chr1', 15727288, '+']
ENST00000375799	1910	1931	0.23995	['chr1', 15727755, '+']	['chr1', 15727776, '+']
ENST00000375799	1940	1978	0.26585	['chr1', 15727785, '+']	['chr1', 15727823, '+']
ENST00000375799	3598	3643	0.446	['chr1', 15734245, '+']	['chr1', 15734290, '+']
ENST00000375793	626	653	0.27836	['chr1', 15718617, '+']	['chr1', 15719752, '+']
ENST00000375793	657	690	0.26245	['chr1', 15719756, '+']	['chr1', 15719789, '+']
ENST00000375793	760	787	0.26265	['chr1', 15719859, '+']	['chr1', 15719886, '+']
ENST00000375793	1056	1094	0.28915	['chr1', 15727019, '+']	['chr1', 15727057, '+']
ENST00000375793	1297	1325	0.2574	['chr1', 15727260, '+']	['chr1', 15727288, '+']
ENST00000375793	1792	1813	0.23995	['chr1', 15727755, '+']	['chr1', 15727776, '+']
ENST00000375793	1822	1860	0.26585	['chr1', 15727785, '+']	['chr1', 15727823, '+']
ENST00000375793	3480	3525	0.446	['chr1', 15734245, '+']	['chr1', 15734290, '+']
ENST00000462455	365	392	0.27836	['chr1', 15718617, '+']	['chr1', 15719752, '+']
ENST00000462455	396	429	0.26245	['chr1', 15719756, '+']	['chr1', 15719789, '+']
ENST00000509138	207	242	0.32855	['chr1', 15777279, '+']	['chr1', 15784574, '+']
ENST00000509138	297	317	0.25973	['chr1', 15784629, '+']	['chr1', 15784649, '+']
ENST00000509138	333	385	0.2364	['chr1', 15784665, '+']	['chr1', 15784717, '+']
ENST00000509138	393	466	0.2924	['chr1', 15784725, '+']	['chr1', 15784798, '+']
ENST00000487496	266	298	0.25929	['chr1', 15938848, '+']	['chr1', 15939299, '+']
ENST00000487496	301	327	0.2477	['chr1', 15939302, '+']	['chr1', 15939328, '+']
ENST00000487496	435	462	0.26435	['chr1', 15939436, '+']	['chr1', 15939463, '+']
ENST00000487496	469	493	0.2477	['chr1', 15939470, '+']	['chr1', 15939494, '+']
ENST00000475078	356	375	0.231	['chr1', 16353417, '+']	['chr1', 16393240, '+']
ENST00000401088	270	289	0.231	['chr1', 16391418, '+']	['chr1', 16393240, '+']
ENST00000401088	737	763	0.2575	['chr1', 16395243, '+']	['chr1', 16395269, '+']
ENST00000471507	263	287	0.28236	['chr1', 16391416, '+']	['chr1', 16393246, '+']
ENST00000471507	729	755	0.2575	['chr1', 16395243, '+']	['chr1', 16395269, '+']
ENST00000401089	78	97	0.231	['chr1', 16367302, '+']	['chr1', 16393240, '+']
ENST00000401089	545	571	0.2575	['chr1', 16395243, '+']	['chr1', 16395269, '+']
ENST00000486763	187	211	0.28236	['chr1', 16391416, '+']	['chr1', 16393246, '+']
ENST00000476423	403	422	0.231	['chr1', 16391418, '+']	['chr1', 16393240, '+']
ENST00000475554	187	206	0.231	['chr1', 16391418, '+']	['chr1', 16393240, '+']
ENST00000472351	177	196	0.231	['chr1', 16391418, '+']	['chr1', 16393240, '+']
ENST00000472351	644	670	0.2575	['chr1', 16395243, '+']	['chr1', 16395269, '+']
ENST00000492354	36	60	0.28236	['chr1', 16367300, '+']	['chr1', 16393246, '+']
ENST00000492354	502	528	0.2575	['chr1', 16395243, '+']	['chr1', 16395269, '+']
ENST00000472461	347	371	0.28236	['chr1', 16391416, '+']	['chr1', 16393246, '+']
ENST00000337132	613	643	0.26415	['chr1', 16451871, '+']	['chr1', 16451901, '+']
ENST00000337132	832	861	0.25045	['chr1', 16455892, '+']	['chr1', 16458869, '+']
ENST00000337132	1058	1149	0.2894	['chr1', 16459066, '+']	['chr1', 16459157, '+']
ENST00000337132	1172	1233	0.30215	['chr1', 16459180, '+']	['chr1', 16459241, '+']
ENST00000337132	1264	1291	0.2628	['chr1', 16459272, '+']	['chr1', 16459299, '+']
ENST00000337132	1710	1774	0.31355	['chr1', 16459718, '+']	['chr1', 16459782, '+']
ENST00000337132	1792	1812	0.23172	['chr1', 16459800, '+']	['chr1', 16459820, '+']
ENST00000337132	1821	1905	0.32985	['chr1', 16459829, '+']	['chr1', 16459913, '+']
ENST00000443980	549	579	0.26415	['chr1', 16451871, '+']	['chr1', 16451901, '+']
ENST00000443980	692	721	0.25045	['chr1', 16452014, '+']	['chr1', 16458869, '+']
ENST00000443980	918	1009	0.2894	['chr1', 16459066, '+']	['chr1', 16459157, '+']
ENST00000443980	1032	1093	0.30215	['chr1', 16459180, '+']	['chr1', 16459241, '+']
ENST00000443980	1124	1151	0.2628	['chr1', 16459272, '+']	['chr1', 16459299, '+']
ENST00000443980	1570	1634	0.31355	['chr1', 16459718, '+']	['chr1', 16459782, '+']
ENST00000443980	1652	1672	0.23172	['chr1', 16459800, '+']	['chr1', 16459820, '+']
ENST00000443980	1681	1765	0.32985	['chr1', 16459829, '+']	['chr1', 16459913, '+']
ENST00000330263	258	295	0.25825	['chr1', 19251796, '+']	['chr1', 19251833, '+']
ENST00000330263	1996	2021	0.242	['chr1', 19259809, '+']	['chr1', 19259834, '+']
ENST00000469076	221	258	0.31792	['chr1', 19324663, '+']	['chr1', 19324700, '+']
ENST00000469076	607	658	0.35682	['chr1', 19326617, '+']	['chr1', 19327271, '+']
ENST00000469076	757	776	0.23482	['chr1', 19327370, '+']	['chr1', 19327389, '+']
ENST00000469076	798	821	0.25938	['chr1', 19327411, '+']	['chr1', 19328593, '+']
ENST00000469076	927	962	0.26985	['chr1', 19328699, '+']	['chr1', 19328734, '+']
ENST00000469076	1014	1038	0.24035	['chr1', 19328786, '+']	['chr1', 19328810, '+']
ENST00000469076	1068	1103	0.3028	['chr1', 19328840, '+']	['chr1', 19328875, '+']
ENST00000469076	1235	1257	0.24157	['chr1', 19329007, '+']	['chr1', 19329029, '+']
ENST00000400548	210	247	0.31792	['chr1', 19324663, '+']	['chr1', 19324700, '+']
ENST00000400548	627	678	0.35682	['chr1', 19326617, '+']	['chr1', 19327271, '+']
ENST00000400548	777	796	0.23482	['chr1', 19327370, '+']	['chr1', 19327389, '+']
ENST00000400548	818	841	0.25938	['chr1', 19327411, '+']	['chr1', 19328593, '+']
ENST00000400548	947	982	0.26985	['chr1', 19328699, '+']	['chr1', 19328734, '+']
ENST00000400548	1034	1058	0.24035	['chr1', 19328786, '+']	['chr1', 19328810, '+']
ENST00000400548	1088	1123	0.3028	['chr1', 19328840, '+']	['chr1', 19328875, '+']
ENST00000400548	1255	1277	0.24157	['chr1', 19329007, '+']	['chr1', 19329029, '+']
ENST00000497827	434	471	0.31792	['chr1', 19324663, '+']	['chr1', 19324700, '+']
ENST00000497827	820	871	0.35682	['chr1', 19326617, '+']	['chr1', 19327271, '+']
ENST00000497827	970	989	0.23482	['chr1', 19327370, '+']	['chr1', 19327389, '+']
ENST00000497827	1011	1034	0.25938	['chr1', 19327411, '+']	['chr1', 19328593, '+']
ENST00000497827	1140	1175	0.26985	['chr1', 19328699, '+']	['chr1', 19328734, '+']
ENST00000497827	1227	1251	0.24035	['chr1', 19328786, '+']	['chr1', 19328810, '+']
ENST00000497827	1281	1316	0.3028	['chr1', 19328840, '+']	['chr1', 19328875, '+']
ENST00000602662	316	337	0.24154	['chr1', 19655196, '+']	['chr1', 19655340, '+']
ENST00000602662	880	902	0.29991	['chr1', 19657313, '+']	['chr1', 19657335, '+']
ENST00000602384	834	855	0.24154	['chr1', 19655196, '+']	['chr1', 19655340, '+']
ENST00000602293	643	664	0.24154	['chr1', 19655196, '+']	['chr1', 19655340, '+']
ENST00000602450	412	433	0.24154	['chr1', 19655196, '+']	['chr1', 19655340, '+']
ENST00000439664	426	447	0.24154	['chr1', 19655196, '+']	['chr1', 19655340, '+']
ENST00000621723	426	447	0.24154	['chr1', 19655196, '+']	['chr1', 19655340, '+']
ENST00000621723	990	1012	0.29991	['chr1', 19657313, '+']	['chr1', 19657335, '+']
ENST00000375136	469	490	0.24154	['chr1', 19655196, '+']	['chr1', 19655340, '+']
ENST00000375136	1033	1055	0.29991	['chr1', 19657313, '+']	['chr1', 19657335, '+']
ENST00000425400	344	365	0.24154	['chr1', 19655196, '+']	['chr1', 19655340, '+']
ENST00000618761	344	365	0.24154	['chr1', 19655196, '+']	['chr1', 19655340, '+']
ENST00000618761	908	930	0.29991	['chr1', 19657313, '+']	['chr1', 19657335, '+']
ENST00000439278	453	474	0.24154	['chr1', 19655196, '+']	['chr1', 19655340, '+']
ENST00000615215	453	474	0.24154	['chr1', 19655196, '+']	['chr1', 19655340, '+']
ENST00000615215	1017	1039	0.29991	['chr1', 19657313, '+']	['chr1', 19657335, '+']
ENST00000427894	246	267	0.24154	['chr1', 19655196, '+']	['chr1', 19655340, '+']
ENST00000548815	246	267	0.24154	['chr1', 19655196, '+']	['chr1', 19655340, '+']
ENST00000548815	810	832	0.29991	['chr1', 19657313, '+']	['chr1', 19657335, '+']
ENST00000428975	361	382	0.24154	['chr1', 19655196, '+']	['chr1', 19655340, '+']
ENST00000289749	351	372	0.24154	['chr1', 19655196, '+']	['chr1', 19655340, '+']
ENST00000451758	402	423	0.24154	['chr1', 19655196, '+']	['chr1', 19655340, '+']
ENST00000622566	402	423	0.24154	['chr1', 19655196, '+']	['chr1', 19655340, '+']
ENST00000622566	966	988	0.29991	['chr1', 19657313, '+']	['chr1', 19657335, '+']
ENST00000321556	516	535	0.23582	['chr1', 20637876, '+']	['chr1', 20637895, '+']
ENST00000321556	756	781	0.2371	['chr1', 20638116, '+']	['chr1', 20639903, '+']
ENST00000321556	1670	1697	0.26915	['chr1', 20650521, '+']	['chr1', 20650548, '+']
ENST00000321556	1861	1881	0.244	['chr1', 20650712, '+']	['chr1', 20650732, '+']
ENST00000321556	1892	1953	0.32545	['chr1', 20650743, '+']	['chr1', 20650804, '+']
ENST00000321556	1965	1993	0.33882	['chr1', 20650816, '+']	['chr1', 20650844, '+']
ENST00000321556	2022	2080	0.3052	['chr1', 20650873, '+']	['chr1', 20650931, '+']
ENST00000321556	2321	2401	0.2956	['chr1', 20651172, '+']	['chr1', 20651252, '+']
ENST00000400490	669	696	0.26915	['chr1', 20650521, '+']	['chr1', 20650548, '+']
ENST00000400490	860	880	0.244	['chr1', 20650712, '+']	['chr1', 20650732, '+']
ENST00000400490	891	952	0.32545	['chr1', 20650743, '+']	['chr1', 20650804, '+']
ENST00000400490	964	992	0.33882	['chr1', 20650816, '+']	['chr1', 20650844, '+']
ENST00000400490	1021	1079	0.3052	['chr1', 20650873, '+']	['chr1', 20650931, '+']
ENST00000400490	1320	1400	0.2956	['chr1', 20651172, '+']	['chr1', 20651252, '+']
ENST00000400259	605	625	0.2337	['chr1', 22086693, '+']	['chr1', 22086713, '+']
ENST00000400259	716	765	0.29392	['chr1', 22086804, '+']	['chr1', 22086853, '+']
ENST00000400259	787	819	0.2796	['chr1', 22091436, '+']	['chr1', 22091468, '+']
ENST00000400259	945	1016	0.3545	['chr1', 22091594, '+']	['chr1', 22091665, '+']
ENST00000400259	1261	1290	0.23575	['chr1', 22091910, '+']	['chr1', 22091939, '+']
ENST00000400259	1757	1779	0.25345	['chr1', 22092406, '+']	['chr1', 22092428, '+']
ENST00000400259	2124	2171	0.25455	['chr1', 22092773, '+']	['chr1', 22092820, '+']
ENST00000344548	564	584	0.2337	['chr1', 22086693, '+']	['chr1', 22086713, '+']
ENST00000344548	675	724	0.29392	['chr1', 22086804, '+']	['chr1', 22086853, '+']
ENST00000344548	746	778	0.2796	['chr1', 22091436, '+']	['chr1', 22091468, '+']
ENST00000344548	904	975	0.3545	['chr1', 22091594, '+']	['chr1', 22091665, '+']
ENST00000344548	1220	1249	0.23575	['chr1', 22091910, '+']	['chr1', 22091939, '+']
ENST00000344548	1716	1738	0.25345	['chr1', 22092406, '+']	['chr1', 22092428, '+']
ENST00000344548	2083	2130	0.25455	['chr1', 22092773, '+']	['chr1', 22092820, '+']
ENST00000356634	56	95	0.31695	['chr1', 23019503, '+']	['chr1', 23019542, '+']
ENST00000356634	676	703	0.2579	['chr1', 23050396, '+']	['chr1', 23050423, '+']
ENST00000356634	710	729	0.23645	['chr1', 23050430, '+']	['chr1', 23050449, '+']
ENST00000356634	736	770	0.25315	['chr1', 23050456, '+']	['chr1', 23050490, '+']
ENST00000356634	776	809	0.30473	['chr1', 23050496, '+']	['chr1', 23053769, '+']
ENST00000356634	964	996	0.30991	['chr1', 23055153, '+']	['chr1', 23055955, '+']
ENST00000356634	1248	1295	0.322	['chr1', 23059159, '+']	['chr1', 23068577, '+']
ENST00000356634	1372	1406	0.29863	['chr1', 23068654, '+']	['chr1', 23069067, '+']
ENST00000356634	1525	1597	0.3011	['chr1', 23071259, '+']	['chr1', 23071331, '+']
ENST00000356634	1893	1922	0.28235	['chr1', 23077309, '+']	['chr1', 23077338, '+']
ENST00000356634	2077	2115	0.27365	['chr1', 23079122, '+']	['chr1', 23079160, '+']
ENST00000356634	2132	2176	0.31205	['chr1', 23079177, '+']	['chr1', 23079596, '+']
ENST00000356634	2239	2260	0.25582	['chr1', 23079659, '+']	['chr1', 23081458, '+']
ENST00000356634	2288	2327	0.3247	['chr1', 23081486, '+']	['chr1', 23081525, '+']
ENST00000356634	2449	2479	0.26205	['chr1', 23082293, '+']	['chr1', 23082323, '+']
ENST00000356634	2864	2889	0.2673	['chr1', 23083520, '+']	['chr1', 23083545, '+']
ENST00000400181	11	50	0.31695	['chr1', 23019503, '+']	['chr1', 23019542, '+']
ENST00000400181	691	718	0.2579	['chr1', 23050396, '+']	['chr1', 23050423, '+']
ENST00000400181	725	744	0.23645	['chr1', 23050430, '+']	['chr1', 23050449, '+']
ENST00000400181	751	785	0.25315	['chr1', 23050456, '+']	['chr1', 23050490, '+']
ENST00000400181	791	824	0.30473	['chr1', 23050496, '+']	['chr1', 23053769, '+']
ENST00000400181	979	1011	0.30991	['chr1', 23055153, '+']	['chr1', 23055955, '+']
ENST00000400181	1275	1322	0.322	['chr1', 23066063, '+']	['chr1', 23068577, '+']
ENST00000400181	1399	1433	0.29863	['chr1', 23068654, '+']	['chr1', 23069067, '+']
ENST00000400181	1552	1624	0.3011	['chr1', 23071259, '+']	['chr1', 23071331, '+']
ENST00000400181	1920	1949	0.28235	['chr1', 23077309, '+']	['chr1', 23077338, '+']
ENST00000400181	2104	2142	0.27365	['chr1', 23079122, '+']	['chr1', 23079160, '+']
ENST00000400181	2159	2203	0.31205	['chr1', 23079177, '+']	['chr1', 23079596, '+']
ENST00000400181	2266	2287	0.25582	['chr1', 23079659, '+']	['chr1', 23081458, '+']
ENST00000400181	2315	2354	0.3247	['chr1', 23081486, '+']	['chr1', 23081525, '+']
ENST00000400181	2476	2506	0.26205	['chr1', 23082293, '+']	['chr1', 23082323, '+']
ENST00000400181	2891	2916	0.2673	['chr1', 23083520, '+']	['chr1', 23083545, '+']
ENST00000481879	6	25	0.23645	['chr1', 23050430, '+']	['chr1', 23050449, '+']
ENST00000481879	32	66	0.25315	['chr1', 23050456, '+']	['chr1', 23050490, '+']
ENST00000481879	72	105	0.30473	['chr1', 23050496, '+']	['chr1', 23053769, '+']
ENST00000465864	286	315	0.28235	['chr1', 23077309, '+']	['chr1', 23077338, '+']
ENST00000465864	470	508	0.27365	['chr1', 23079122, '+']	['chr1', 23079160, '+']
ENST00000465864	525	547	0.27327	['chr1', 23079177, '+']	['chr1', 23079574, '+']
ENST00000494920	76	105	0.28235	['chr1', 23077309, '+']	['chr1', 23077338, '+']
ENST00000494920	143	162	0.24527	['chr1', 23078981, '+']	['chr1', 23079000, '+']
ENST00000494920	284	322	0.27365	['chr1', 23079122, '+']	['chr1', 23079160, '+']
ENST00000494920	339	383	0.31205	['chr1', 23079177, '+']	['chr1', 23079596, '+']
ENST00000494920	446	467	0.25582	['chr1', 23079659, '+']	['chr1', 23081458, '+']
ENST00000494920	495	534	0.3247	['chr1', 23081486, '+']	['chr1', 23081525, '+']
ENST00000494920	656	686	0.26205	['chr1', 23082293, '+']	['chr1', 23082323, '+']
ENST00000602503	565	586	0.25582	['chr1', 23081437, '+']	['chr1', 23081458, '+']
ENST00000602503	614	653	0.3247	['chr1', 23081486, '+']	['chr1', 23081525, '+']
ENST00000602503	1421	1451	0.26205	['chr1', 23082293, '+']	['chr1', 23082323, '+']
ENST00000602503	2648	2673	0.2673	['chr1', 23083520, '+']	['chr1', 23083545, '+']
ENST00000374550	280	299	0.2319	['chr1', 23693884, '+']	['chr1', 23693903, '+']
ENST00000482370	532	551	0.2319	['chr1', 23693884, '+']	['chr1', 23693903, '+']
ENST00000443624	229	248	0.2319	['chr1', 23693884, '+']	['chr1', 23693903, '+']
ENST00000458455	229	248	0.2319	['chr1', 23693884, '+']	['chr1', 23693903, '+']
ENST00000418390	650	673	0.25435	['chr1', 23750906, '+']	['chr1', 23750929, '+']
ENST00000418390	1141	1160	0.23655	['chr1', 23751397, '+']	['chr1', 23751416, '+']
ENST00000418390	1240	1275	0.3092	['chr1', 23751496, '+']	['chr1', 23751531, '+']
ENST00000418390	1358	1391	0.2622	['chr1', 23751614, '+']	['chr1', 23751647, '+']
ENST00000418390	1534	1572	0.2977	['chr1', 23751790, '+']	['chr1', 23751828, '+']
ENST00000418390	1605	1626	0.24125	['chr1', 23751861, '+']	['chr1', 23751882, '+']
ENST00000418390	1745	1776	0.2805	['chr1', 23752001, '+']	['chr1', 23752408, '+']
ENST00000418390	1878	1905	0.24638	['chr1', 23752510, '+']	['chr1', 23754118, '+']
ENST00000418390	1929	1960	0.29105	['chr1', 23754142, '+']	['chr1', 23754173, '+']
ENST00000418390	1978	1998	0.24425	['chr1', 23754191, '+']	['chr1', 23754211, '+']
ENST00000418390	2948	2988	0.35992	['chr1', 23759853, '+']	['chr1', 23759893, '+']
ENST00000418390	3417	3451	0.26773	['chr1', 23760322, '+']	['chr1', 23760356, '+']
ENST00000418390	3813	3871	0.32164	['chr1', 23760718, '+']	['chr1', 23760776, '+']
ENST00000418390	4109	4147	0.27522	['chr1', 23761014, '+']	['chr1', 23761052, '+']
ENST00000613537	439	462	0.25435	['chr1', 23750906, '+']	['chr1', 23750929, '+']
ENST00000613537	930	949	0.23655	['chr1', 23751397, '+']	['chr1', 23751416, '+']
ENST00000613537	1029	1064	0.3092	['chr1', 23751496, '+']	['chr1', 23751531, '+']
ENST00000613537	1147	1180	0.2622	['chr1', 23751614, '+']	['chr1', 23751647, '+']
ENST00000613537	1323	1361	0.2977	['chr1', 23751790, '+']	['chr1', 23751828, '+']
ENST00000613537	1394	1415	0.24125	['chr1', 23751861, '+']	['chr1', 23751882, '+']
ENST00000613537	1534	1565	0.2805	['chr1', 23752001, '+']	['chr1', 23752408, '+']
ENST00000613537	1667	1694	0.24638	['chr1', 23752510, '+']	['chr1', 23754118, '+']
ENST00000613537	1718	1749	0.29105	['chr1', 23754142, '+']	['chr1', 23754173, '+']
ENST00000613537	1767	1787	0.24425	['chr1', 23754191, '+']	['chr1', 23754211, '+']
ENST00000613537	2737	2777	0.35992	['chr1', 23759853, '+']	['chr1', 23759893, '+']
ENST00000613537	3206	3240	0.26773	['chr1', 23760322, '+']	['chr1', 23760356, '+']
ENST00000613537	3602	3660	0.32164	['chr1', 23760718, '+']	['chr1', 23760776, '+']
ENST00000613537	3898	3936	0.27522	['chr1', 23761014, '+']	['chr1', 23761052, '+']
ENST00000609199	333	356	0.25435	['chr1', 23750906, '+']	['chr1', 23750929, '+']
ENST00000609199	824	843	0.23655	['chr1', 23751397, '+']	['chr1', 23751416, '+']
ENST00000609199	923	958	0.3092	['chr1', 23751496, '+']	['chr1', 23751531, '+']
ENST00000609199	1041	1074	0.2622	['chr1', 23751614, '+']	['chr1', 23751647, '+']
ENST00000609199	1217	1255	0.2977	['chr1', 23751790, '+']	['chr1', 23751828, '+']
ENST00000609199	1288	1309	0.24125	['chr1', 23751861, '+']	['chr1', 23751882, '+']
ENST00000609199	1428	1459	0.2805	['chr1', 23752001, '+']	['chr1', 23752408, '+']
ENST00000609199	1561	1588	0.24638	['chr1', 23752510, '+']	['chr1', 23754118, '+']
ENST00000609199	1612	1643	0.29105	['chr1', 23754142, '+']	['chr1', 23754173, '+']
ENST00000609199	1661	1681	0.24425	['chr1', 23754191, '+']	['chr1', 23754211, '+']
ENST00000246151	88	131	0.29505	['chr1', 23778492, '+']	['chr1', 23778535, '+']
ENST00000246151	654	696	0.3344	['chr1', 23787283, '+']	['chr1', 23787325, '+']
ENST00000246151	779	807	0.2512	['chr1', 23787408, '+']	['chr1', 23787436, '+']
ENST00000246151	820	849	0.2371	['chr1', 23787449, '+']	['chr1', 23787478, '+']
ENST00000246151	1135	1162	0.31675	['chr1', 23787764, '+']	['chr1', 23787791, '+']
ENST00000246151	1238	1271	0.2666	['chr1', 23787867, '+']	['chr1', 23787900, '+']
ENST00000246151	1308	1333	0.27015	['chr1', 23787937, '+']	['chr1', 23787962, '+']
ENST00000246151	1340	1393	0.29335	['chr1', 23787969, '+']	['chr1', 23788022, '+']
ENST00000374524	343	385	0.3344	['chr1', 23787283, '+']	['chr1', 23787325, '+']
ENST00000374524	468	496	0.2512	['chr1', 23787408, '+']	['chr1', 23787436, '+']
ENST00000374524	509	538	0.2371	['chr1', 23787449, '+']	['chr1', 23787478, '+']
ENST00000374524	824	851	0.31675	['chr1', 23787764, '+']	['chr1', 23787791, '+']
ENST00000374524	927	960	0.2666	['chr1', 23787867, '+']	['chr1', 23787900, '+']
ENST00000374524	997	1022	0.27015	['chr1', 23787937, '+']	['chr1', 23787962, '+']
ENST00000374524	1029	1082	0.29335	['chr1', 23787969, '+']	['chr1', 23788022, '+']
ENST00000374514	347	382	0.33931	['chr1', 23792722, '+']	['chr1', 23792757, '+']
ENST00000374514	705	724	0.2463	['chr1', 23794252, '+']	['chr1', 23794271, '+']
ENST00000374514	741	778	0.2772	['chr1', 23794288, '+']	['chr1', 23794325, '+']
ENST00000374514	825	848	0.2568	['chr1', 23794473, '+']	['chr1', 23794496, '+']
ENST00000374514	875	899	0.2515	['chr1', 23794523, '+']	['chr1', 23794547, '+']
ENST00000374514	1672	1692	0.26036	['chr1', 23795401, '+']	['chr1', 23795421, '+']
ENST00000374514	1730	1753	0.24345	['chr1', 23795459, '+']	['chr1', 23795482, '+']
ENST00000420982	130	165	0.33931	['chr1', 23792722, '+']	['chr1', 23792757, '+']
ENST00000420982	456	475	0.2463	['chr1', 23794252, '+']	['chr1', 23794271, '+']
ENST00000420982	492	529	0.2772	['chr1', 23794288, '+']	['chr1', 23794325, '+']
ENST00000374505	130	165	0.33931	['chr1', 23792722, '+']	['chr1', 23792757, '+']
ENST00000374505	414	433	0.2463	['chr1', 23794252, '+']	['chr1', 23794271, '+']
ENST00000374505	450	496	0.2772	['chr1', 23794288, '+']	['chr1', 23794334, '+']
ENST00000374505	635	658	0.2568	['chr1', 23794473, '+']	['chr1', 23794496, '+']
ENST00000374505	685	709	0.2515	['chr1', 23794523, '+']	['chr1', 23794547, '+']
ENST00000495365	114	149	0.33931	['chr1', 23792722, '+']	['chr1', 23792757, '+']
ENST00000495365	401	420	0.2463	['chr1', 23794252, '+']	['chr1', 23794271, '+']
ENST00000495365	437	474	0.2772	['chr1', 23794288, '+']	['chr1', 23794325, '+']
ENST00000495365	521	544	0.2568	['chr1', 23794473, '+']	['chr1', 23794496, '+']
ENST00000495365	571	595	0.2515	['chr1', 23794523, '+']	['chr1', 23794547, '+']
ENST00000374503	114	149	0.33931	['chr1', 23792722, '+']	['chr1', 23792757, '+']
ENST00000374503	472	491	0.2463	['chr1', 23794252, '+']	['chr1', 23794271, '+']
ENST00000374503	508	545	0.2772	['chr1', 23794288, '+']	['chr1', 23794325, '+']
ENST00000374502	96	131	0.33931	['chr1', 23792722, '+']	['chr1', 23792757, '+']
ENST00000374502	454	473	0.2463	['chr1', 23794252, '+']	['chr1', 23794271, '+']
ENST00000374502	490	536	0.2772	['chr1', 23794288, '+']	['chr1', 23794334, '+']
ENST00000374502	675	698	0.2568	['chr1', 23794473, '+']	['chr1', 23794496, '+']
ENST00000374502	725	749	0.2515	['chr1', 23794523, '+']	['chr1', 23794547, '+']
ENST00000492577	113	148	0.33931	['chr1', 23792722, '+']	['chr1', 23792757, '+']
ENST00000492577	439	458	0.2463	['chr1', 23794252, '+']	['chr1', 23794271, '+']
ENST00000492577	475	512	0.2772	['chr1', 23794288, '+']	['chr1', 23794325, '+']
ENST00000492577	559	582	0.2568	['chr1', 23794473, '+']	['chr1', 23794496, '+']
ENST00000492577	609	633	0.2515	['chr1', 23794523, '+']	['chr1', 23794547, '+']
ENST00000374501	274	293	0.2463	['chr1', 23794252, '+']	['chr1', 23794271, '+']
ENST00000374501	310	347	0.2772	['chr1', 23794288, '+']	['chr1', 23794325, '+']
ENST00000374501	394	417	0.2568	['chr1', 23794473, '+']	['chr1', 23794496, '+']
ENST00000374501	444	468	0.2515	['chr1', 23794523, '+']	['chr1', 23794547, '+']
ENST00000472213	74	93	0.2463	['chr1', 23794252, '+']	['chr1', 23794271, '+']
ENST00000472213	110	156	0.2772	['chr1', 23794288, '+']	['chr1', 23794334, '+']
ENST00000472213	295	318	0.2568	['chr1', 23794473, '+']	['chr1', 23794496, '+']
ENST00000472213	345	369	0.2515	['chr1', 23794523, '+']	['chr1', 23794547, '+']
ENST00000478890	256	279	0.25275	['chr1', 24648867, '+']	['chr1', 24648890, '+']
ENST00000478890	291	333	0.3549	['chr1', 24648902, '+']	['chr1', 24648944, '+']
ENST00000478890	338	375	0.339	['chr1', 24648949, '+']	['chr1', 24648986, '+']
ENST00000323848	558	581	0.25275	['chr1', 24648867, '+']	['chr1', 24648890, '+']
ENST00000323848	593	635	0.3549	['chr1', 24648902, '+']	['chr1', 24648944, '+']
ENST00000323848	640	677	0.339	['chr1', 24648949, '+']	['chr1', 24648986, '+']
ENST00000323848	1574	1594	0.24744	['chr1', 24655073, '+']	['chr1', 24655093, '+']
ENST00000323848	1618	1637	0.24627	['chr1', 24655117, '+']	['chr1', 24660725, '+']
ENST00000323848	2025	2051	0.2518	['chr1', 24666896, '+']	['chr1', 24666922, '+']
ENST00000323848	2686	2723	0.2614	['chr1', 24670286, '+']	['chr1', 24671393, '+']
ENST00000323848	3641	3676	0.2756	['chr1', 24672897, '+']	['chr1', 24672932, '+']
ENST00000323848	3723	3750	0.27355	['chr1', 24672979, '+']	['chr1', 24673006, '+']
ENST00000468822	295	318	0.25275	['chr1', 24648867, '+']	['chr1', 24648890, '+']
ENST00000468822	330	372	0.3549	['chr1', 24648902, '+']	['chr1', 24648944, '+']
ENST00000468822	377	414	0.339	['chr1', 24648949, '+']	['chr1', 24648986, '+']
ENST00000374389	271	294	0.25275	['chr1', 24648867, '+']	['chr1', 24648890, '+']
ENST00000374389	306	348	0.3549	['chr1', 24648902, '+']	['chr1', 24648944, '+']
ENST00000374389	353	390	0.339	['chr1', 24648949, '+']	['chr1', 24648986, '+']
ENST00000374389	1272	1292	0.24744	['chr1', 24655073, '+']	['chr1', 24655093, '+']
ENST00000374389	1316	1335	0.24627	['chr1', 24655117, '+']	['chr1', 24660725, '+']
ENST00000374389	1765	1791	0.2518	['chr1', 24666896, '+']	['chr1', 24666922, '+']
ENST00000374389	2426	2463	0.2614	['chr1', 24670286, '+']	['chr1', 24671393, '+']
ENST00000490543	395	418	0.25275	['chr1', 24648867, '+']	['chr1', 24648890, '+']
ENST00000490543	430	472	0.3549	['chr1', 24648902, '+']	['chr1', 24648944, '+']
ENST00000490543	477	514	0.339	['chr1', 24648949, '+']	['chr1', 24648986, '+']
ENST00000479034	262	285	0.25275	['chr1', 24648867, '+']	['chr1', 24648890, '+']
ENST00000479034	297	339	0.3549	['chr1', 24648902, '+']	['chr1', 24648944, '+']
ENST00000479034	344	381	0.339	['chr1', 24648949, '+']	['chr1', 24648986, '+']
ENST00000479034	1278	1298	0.24744	['chr1', 24655073, '+']	['chr1', 24655093, '+']
ENST00000479034	1322	1341	0.24627	['chr1', 24655117, '+']	['chr1', 24660725, '+']
ENST00000479034	1771	1797	0.2518	['chr1', 24666896, '+']	['chr1', 24666922, '+']
ENST00000479034	2432	2469	0.2614	['chr1', 24670286, '+']	['chr1', 24671393, '+']
ENST00000447431	248	271	0.25275	['chr1', 24648867, '+']	['chr1', 24648890, '+']
ENST00000447431	283	325	0.3549	['chr1', 24648902, '+']	['chr1', 24648944, '+']
ENST00000447431	330	367	0.339	['chr1', 24648949, '+']	['chr1', 24648986, '+']
ENST00000447431	1261	1281	0.24744	['chr1', 24655073, '+']	['chr1', 24655093, '+']
ENST00000447431	1305	1324	0.24627	['chr1', 24655117, '+']	['chr1', 24660725, '+']
ENST00000447431	1712	1738	0.2518	['chr1', 24666896, '+']	['chr1', 24666922, '+']
ENST00000447431	2371	2408	0.2614	['chr1', 24670286, '+']	['chr1', 24671393, '+']
ENST00000447431	3326	3361	0.2756	['chr1', 24672897, '+']	['chr1', 24672932, '+']
ENST00000447431	3408	3435	0.27355	['chr1', 24672979, '+']	['chr1', 24673006, '+']
ENST00000596378	396	419	0.25275	['chr1', 24648867, '+']	['chr1', 24648890, '+']
ENST00000596378	431	473	0.3549	['chr1', 24648902, '+']	['chr1', 24648944, '+']
ENST00000596378	478	515	0.339	['chr1', 24648949, '+']	['chr1', 24648986, '+']
ENST00000596378	1412	1432	0.24744	['chr1', 24655073, '+']	['chr1', 24655093, '+']
ENST00000596378	1899	1925	0.2518	['chr1', 24666896, '+']	['chr1', 24666922, '+']
ENST00000494934	334	357	0.25275	['chr1', 24648867, '+']	['chr1', 24648890, '+']
ENST00000494934	369	411	0.3549	['chr1', 24648902, '+']	['chr1', 24648944, '+']
ENST00000494934	416	453	0.339	['chr1', 24648949, '+']	['chr1', 24648986, '+']
ENST00000495561	250	273	0.25275	['chr1', 24648867, '+']	['chr1', 24648890, '+']
ENST00000495561	285	327	0.3549	['chr1', 24648902, '+']	['chr1', 24648944, '+']
ENST00000495561	332	369	0.339	['chr1', 24648949, '+']	['chr1', 24648986, '+']
ENST00000470243	665	685	0.24744	['chr1', 24655073, '+']	['chr1', 24655093, '+']
ENST00000496882	471	491	0.24744	['chr1', 24655073, '+']	['chr1', 24655093, '+']
ENST00000461768	63	83	0.24744	['chr1', 24655073, '+']	['chr1', 24655093, '+']
ENST00000485541	52	72	0.24744	['chr1', 24655073, '+']	['chr1', 24655093, '+']
ENST00000474843	704	741	0.2614	['chr1', 24670286, '+']	['chr1', 24671393, '+']
ENST00000489758	30	55	0.2532	['chr1', 24745438, '+']	['chr1', 24745463, '+']
ENST00000489758	68	105	0.2762	['chr1', 24745476, '+']	['chr1', 24745513, '+']
ENST00000374358	535	573	0.29705	['chr1', 25338451, '+']	['chr1', 25340506, '+']
ENST00000374358	574	606	0.2896	['chr1', 25340507, '+']	['chr1', 25340539, '+']
ENST00000374358	646	690	0.3951	['chr1', 25340579, '+']	['chr1', 25343004, '+']
ENST00000374358	998	1017	0.23245	['chr1', 25360676, '+']	['chr1', 25360695, '+']
ENST00000374358	1179	1212	0.25405	['chr1', 25360857, '+']	['chr1', 25360890, '+']
ENST00000374358	1536	1563	0.30036	['chr1', 25361214, '+']	['chr1', 25361241, '+']
ENST00000374358	1621	1642	0.27291	['chr1', 25361299, '+']	['chr1', 25361320, '+']
ENST00000374358	1682	1703	0.2437	['chr1', 25361360, '+']	['chr1', 25361381, '+']
ENST00000374358	1881	1960	0.3192	['chr1', 25361559, '+']	['chr1', 25361638, '+']
ENST00000374358	2098	2147	0.29085	['chr1', 25361776, '+']	['chr1', 25361825, '+']
ENST00000374358	2297	2330	0.26285	['chr1', 25361975, '+']	['chr1', 25362008, '+']
ENST00000374358	2360	2407	0.286	['chr1', 25362038, '+']	['chr1', 25362085, '+']
ENST00000498135	135	173	0.29705	['chr1', 25338451, '+']	['chr1', 25340506, '+']
ENST00000498135	174	206	0.2896	['chr1', 25340507, '+']	['chr1', 25340539, '+']
ENST00000498135	485	504	0.23245	['chr1', 25360676, '+']	['chr1', 25360695, '+']
ENST00000498135	666	699	0.25405	['chr1', 25360857, '+']	['chr1', 25360890, '+']
ENST00000491936	376	395	0.23245	['chr1', 25360676, '+']	['chr1', 25360695, '+']
ENST00000491936	557	590	0.25405	['chr1', 25360857, '+']	['chr1', 25360890, '+']
ENST00000491936	914	944	0.30036	['chr1', 25361214, '+']	['chr1', 25361244, '+']
ENST00000480937	129	167	0.29705	['chr1', 25338451, '+']	['chr1', 25340506, '+']
ENST00000480937	168	200	0.2896	['chr1', 25340507, '+']	['chr1', 25340539, '+']
ENST00000480937	240	284	0.3951	['chr1', 25340579, '+']	['chr1', 25343004, '+']
ENST00000480937	499	518	0.23245	['chr1', 25360676, '+']	['chr1', 25360695, '+']
ENST00000480937	680	713	0.25405	['chr1', 25360857, '+']	['chr1', 25360890, '+']
ENST00000480937	1037	1064	0.30036	['chr1', 25361214, '+']	['chr1', 25361241, '+']
ENST00000374338	200	258	0.40342	['chr1', 25543779, '+']	['chr1', 25553972, '+']
ENST00000374338	455	476	0.23973	['chr1', 25554964, '+']	['chr1', 25557165, '+']
ENST00000374338	488	517	0.27255	['chr1', 25557177, '+']	['chr1', 25557206, '+']
ENST00000374338	727	755	0.23718	['chr1', 25563145, '+']	['chr1', 25563680, '+']
ENST00000374338	945	991	0.37008	['chr1', 25566891, '+']	['chr1', 25566937, '+']
ENST00000374338	1078	1119	0.27274	['chr1', 25567024, '+']	['chr1', 25567065, '+']
ENST00000374338	1171	1192	0.24883	['chr1', 25567117, '+']	['chr1', 25567138, '+']
ENST00000374338	1355	1379	0.2807	['chr1', 25567301, '+']	['chr1', 25567325, '+']
ENST00000374338	1457	1480	0.2588	['chr1', 25567403, '+']	['chr1', 25567426, '+']
ENST00000374338	1548	1611	0.35236	['chr1', 25567494, '+']	['chr1', 25567557, '+']
ENST00000374338	1663	1734	0.3005	['chr1', 25567609, '+']	['chr1', 25567680, '+']
ENST00000374338	1761	1796	0.31415	['chr1', 25567707, '+']	['chr1', 25567742, '+']
ENST00000374338	1811	1869	0.33585	['chr1', 25567757, '+']	['chr1', 25567815, '+']
ENST00000374338	1906	1932	0.25407	['chr1', 25567852, '+']	['chr1', 25567878, '+']
ENST00000374338	2107	2126	0.2315	['chr1', 25568053, '+']	['chr1', 25568072, '+']
ENST00000374338	2284	2304	0.23908	['chr1', 25568230, '+']	['chr1', 25568250, '+']
ENST00000374338	2335	2373	0.2826	['chr1', 25568281, '+']	['chr1', 25568319, '+']
ENST00000374338	2395	2426	0.24025	['chr1', 25568341, '+']	['chr1', 25568372, '+']
ENST00000374338	2529	2553	0.2434	['chr1', 25568475, '+']	['chr1', 25568499, '+']
ENST00000374338	2762	2796	0.31465	['chr1', 25568708, '+']	['chr1', 25568742, '+']
ENST00000374338	2806	2880	0.3274	['chr1', 25568752, '+']	['chr1', 25568826, '+']
ENST00000354177	136	162	0.24957	['chr1', 25800311, '+']	['chr1', 25800337, '+']
ENST00000354177	194	228	0.25723	['chr1', 25800369, '+']	['chr1', 25800403, '+']
ENST00000354177	1440	1476	0.28575	['chr1', 25813980, '+']	['chr1', 25814099, '+']
ENST00000354177	1481	1517	0.2518	['chr1', 25814104, '+']	['chr1', 25814140, '+']
ENST00000354177	3524	3550	0.2319	['chr1', 25817516, '+']	['chr1', 25817542, '+']
ENST00000361547	136	162	0.24957	['chr1', 25800311, '+']	['chr1', 25800337, '+']
ENST00000361547	194	228	0.25723	['chr1', 25800369, '+']	['chr1', 25800403, '+']
ENST00000361547	1542	1578	0.28575	['chr1', 25813980, '+']	['chr1', 25814099, '+']
ENST00000361547	1583	1619	0.2518	['chr1', 25814104, '+']	['chr1', 25814140, '+']
ENST00000361547	3626	3652	0.2319	['chr1', 25817516, '+']	['chr1', 25817542, '+']
ENST00000374315	119	145	0.24957	['chr1', 25800311, '+']	['chr1', 25800337, '+']
ENST00000374315	177	211	0.25723	['chr1', 25800369, '+']	['chr1', 25800403, '+']
ENST00000374315	1423	1459	0.28575	['chr1', 25813980, '+']	['chr1', 25814099, '+']
ENST00000374315	1464	1500	0.2518	['chr1', 25814104, '+']	['chr1', 25814140, '+']
ENST00000374315	3507	3533	0.2319	['chr1', 25817516, '+']	['chr1', 25817542, '+']
ENST00000559265	270	328	0.2884	['chr1', 25823010, '+']	['chr1', 25823068, '+']
ENST00000630065	207	243	0.28575	['chr1', 25813980, '+']	['chr1', 25814099, '+']
ENST00000630065	248	284	0.2518	['chr1', 25814104, '+']	['chr1', 25814140, '+']
ENST00000630065	2291	2317	0.2319	['chr1', 25817516, '+']	['chr1', 25817542, '+']
ENST00000494537	254	290	0.28575	['chr1', 25813980, '+']	['chr1', 25814099, '+']
ENST00000494537	295	331	0.2518	['chr1', 25814104, '+']	['chr1', 25814140, '+']
ENST00000527604	8	44	0.28575	['chr1', 25813980, '+']	['chr1', 25814099, '+']
ENST00000527604	49	85	0.2518	['chr1', 25814104, '+']	['chr1', 25814140, '+']
ENST00000527604	121	173	0.2884	['chr1', 25814176, '+']	['chr1', 25823068, '+']
ENST00000527604	225	245	0.24273	['chr1', 25823120, '+']	['chr1', 25823655, '+']
ENST00000424294	205	263	0.2884	['chr1', 25818844, '+']	['chr1', 25823068, '+']
ENST00000424294	315	335	0.24273	['chr1', 25823120, '+']	['chr1', 25823655, '+']
ENST00000424294	667	692	0.23845	['chr1', 25826743, '+']	['chr1', 25826768, '+']
ENST00000374303	116	174	0.2884	['chr1', 25820021, '+']	['chr1', 25823068, '+']
ENST00000374303	226	246	0.24273	['chr1', 25823120, '+']	['chr1', 25823655, '+']
ENST00000374303	578	603	0.23845	['chr1', 25826743, '+']	['chr1', 25826768, '+']
ENST00000374303	733	753	0.24095	['chr1', 25829580, '+']	['chr1', 25829600, '+']
ENST00000374303	961	983	0.24485	['chr1', 25829808, '+']	['chr1', 25829830, '+']
ENST00000374303	984	1021	0.3039	['chr1', 25831921, '+']	['chr1', 25831958, '+']
ENST00000374303	1056	1080	0.23855	['chr1', 25831993, '+']	['chr1', 25832017, '+']
ENST00000374303	1192	1214	0.24035	['chr1', 25832129, '+']	['chr1', 25832151, '+']
ENST00000374303	1275	1303	0.36809	['chr1', 25832212, '+']	['chr1', 25832240, '+']
ENST00000374303	1311	1334	0.30209	['chr1', 25832248, '+']	['chr1', 25832271, '+']
ENST00000374303	1346	1378	0.29465	['chr1', 25832283, '+']	['chr1', 25832315, '+']
ENST00000374303	1394	1422	0.24075	['chr1', 25832331, '+']	['chr1', 25832359, '+']
ENST00000374303	1821	1854	0.27605	['chr1', 25832758, '+']	['chr1', 25832791, '+']
ENST00000374303	1943	1973	0.2477	['chr1', 25832880, '+']	['chr1', 25832910, '+']
ENST00000533762	96	154	0.2884	['chr1', 25820021, '+']	['chr1', 25823068, '+']
ENST00000533762	406	426	0.24273	['chr1', 25823431, '+']	['chr1', 25823655, '+']
ENST00000529116	116	174	0.2884	['chr1', 25823010, '+']	['chr1', 25823068, '+']
ENST00000529116	226	246	0.24273	['chr1', 25823120, '+']	['chr1', 25823655, '+']
ENST00000474295	93	151	0.2884	['chr1', 25820021, '+']	['chr1', 25823068, '+']
ENST00000474295	203	223	0.24273	['chr1', 25823120, '+']	['chr1', 25823655, '+']
ENST00000474295	555	580	0.23845	['chr1', 25826743, '+']	['chr1', 25826768, '+']
ENST00000474295	829	851	0.24485	['chr1', 25829808, '+']	['chr1', 25829830, '+']
ENST00000474295	852	889	0.3039	['chr1', 25831921, '+']	['chr1', 25831958, '+']
ENST00000474295	924	948	0.23855	['chr1', 25831993, '+']	['chr1', 25832017, '+']
ENST00000474295	1060	1082	0.24035	['chr1', 25832129, '+']	['chr1', 25832151, '+']
ENST00000474295	1143	1171	0.36809	['chr1', 25832212, '+']	['chr1', 25832240, '+']
ENST00000474295	1179	1202	0.30209	['chr1', 25832248, '+']	['chr1', 25832271, '+']
ENST00000474295	1214	1246	0.29465	['chr1', 25832283, '+']	['chr1', 25832315, '+']
ENST00000474295	1262	1290	0.24075	['chr1', 25832331, '+']	['chr1', 25832359, '+']
ENST00000474295	1689	1722	0.27605	['chr1', 25832758, '+']	['chr1', 25832791, '+']
ENST00000474295	1811	1841	0.2477	['chr1', 25832880, '+']	['chr1', 25832910, '+']
ENST00000488327	106	126	0.24273	['chr1', 25823635, '+']	['chr1', 25823655, '+']
ENST00000488327	458	483	0.23845	['chr1', 25826743, '+']	['chr1', 25826768, '+']
ENST00000472643	82	102	0.24273	['chr1', 25820021, '+']	['chr1', 25823655, '+']
ENST00000472643	434	459	0.23845	['chr1', 25826743, '+']	['chr1', 25826768, '+']
ENST00000472643	589	609	0.24095	['chr1', 25829580, '+']	['chr1', 25829600, '+']
ENST00000469815	44	64	0.24273	['chr1', 25820021, '+']	['chr1', 25823655, '+']
ENST00000469815	229	249	0.24095	['chr1', 25829580, '+']	['chr1', 25829600, '+']
ENST00000469815	457	479	0.24485	['chr1', 25829808, '+']	['chr1', 25829830, '+']
ENST00000469815	480	517	0.3039	['chr1', 25831921, '+']	['chr1', 25831958, '+']
ENST00000469815	552	576	0.23855	['chr1', 25831993, '+']	['chr1', 25832017, '+']
ENST00000469815	688	710	0.24035	['chr1', 25832129, '+']	['chr1', 25832151, '+']
ENST00000469815	771	799	0.36809	['chr1', 25832212, '+']	['chr1', 25832240, '+']
ENST00000469815	807	830	0.30209	['chr1', 25832248, '+']	['chr1', 25832271, '+']
ENST00000469815	842	872	0.34864	['chr1', 25832283, '+']	['chr1', 25832313, '+']
ENST00000526894	43	101	0.2884	['chr1', 25820021, '+']	['chr1', 25823068, '+']
ENST00000526894	153	173	0.24273	['chr1', 25823120, '+']	['chr1', 25823655, '+']
ENST00000526894	505	530	0.23845	['chr1', 25826743, '+']	['chr1', 25826768, '+']
ENST00000478284	41	99	0.2884	['chr1', 25820021, '+']	['chr1', 25823068, '+']
ENST00000478284	245	265	0.24273	['chr1', 25823431, '+']	['chr1', 25823655, '+']
ENST00000478284	597	622	0.23845	['chr1', 25826743, '+']	['chr1', 25826768, '+']
ENST00000524618	36	94	0.2884	['chr1', 25820021, '+']	['chr1', 25823068, '+']
ENST00000524618	169	189	0.24273	['chr1', 25823635, '+']	['chr1', 25823655, '+']
ENST00000524618	521	546	0.23845	['chr1', 25826743, '+']	['chr1', 25826768, '+']
ENST00000524618	676	696	0.24095	['chr1', 25829580, '+']	['chr1', 25829600, '+']
ENST00000524618	904	926	0.24485	['chr1', 25829808, '+']	['chr1', 25829830, '+']
ENST00000524618	927	964	0.3039	['chr1', 25831921, '+']	['chr1', 25831958, '+']
ENST00000524618	999	1023	0.23855	['chr1', 25831993, '+']	['chr1', 25832017, '+']
ENST00000524618	1135	1157	0.24035	['chr1', 25832129, '+']	['chr1', 25832151, '+']
ENST00000374307	19	77	0.2884	['chr1', 25820021, '+']	['chr1', 25823068, '+']
ENST00000374307	129	149	0.24273	['chr1', 25823120, '+']	['chr1', 25823655, '+']
ENST00000374307	481	506	0.23845	['chr1', 25826743, '+']	['chr1', 25826768, '+']
ENST00000374307	600	620	0.24095	['chr1', 25829580, '+']	['chr1', 25829600, '+']
ENST00000374307	828	850	0.24485	['chr1', 25829808, '+']	['chr1', 25829830, '+']
ENST00000374307	851	888	0.3039	['chr1', 25831921, '+']	['chr1', 25831958, '+']
ENST00000374307	923	947	0.23855	['chr1', 25831993, '+']	['chr1', 25832017, '+']
ENST00000374307	1059	1081	0.24035	['chr1', 25832129, '+']	['chr1', 25832151, '+']
ENST00000374307	1142	1170	0.36809	['chr1', 25832212, '+']	['chr1', 25832240, '+']
ENST00000374307	1178	1201	0.30209	['chr1', 25832248, '+']	['chr1', 25832271, '+']
ENST00000374307	1213	1245	0.29465	['chr1', 25832283, '+']	['chr1', 25832315, '+']
ENST00000374307	1261	1289	0.24075	['chr1', 25832331, '+']	['chr1', 25832359, '+']
ENST00000374307	1688	1721	0.27605	['chr1', 25832758, '+']	['chr1', 25832791, '+']
ENST00000374307	1810	1847	0.2477	['chr1', 25832880, '+']	['chr1', 25832917, '+']
ENST00000528624	154	212	0.2884	['chr1', 25820341, '+']	['chr1', 25823068, '+']
ENST00000528624	350	370	0.24273	['chr1', 25823315, '+']	['chr1', 25823655, '+']
ENST00000525713	149	207	0.2884	['chr1', 25820341, '+']	['chr1', 25823068, '+']
ENST00000525713	259	279	0.24273	['chr1', 25823120, '+']	['chr1', 25823655, '+']
ENST00000374301	214	272	0.2884	['chr1', 25820406, '+']	['chr1', 25823068, '+']
ENST00000374301	324	344	0.24273	['chr1', 25823120, '+']	['chr1', 25823655, '+']
ENST00000374301	676	701	0.23845	['chr1', 25826743, '+']	['chr1', 25826768, '+']
ENST00000374301	831	851	0.24095	['chr1', 25829580, '+']	['chr1', 25829600, '+']
ENST00000374301	1059	1081	0.24485	['chr1', 25829808, '+']	['chr1', 25829830, '+']
ENST00000374301	1082	1119	0.3039	['chr1', 25831921, '+']	['chr1', 25831958, '+']
ENST00000374301	1154	1178	0.23855	['chr1', 25831993, '+']	['chr1', 25832017, '+']
ENST00000374301	1290	1312	0.24035	['chr1', 25832129, '+']	['chr1', 25832151, '+']
ENST00000374301	1373	1401	0.36809	['chr1', 25832212, '+']	['chr1', 25832240, '+']
ENST00000374301	1409	1432	0.30209	['chr1', 25832248, '+']	['chr1', 25832271, '+']
ENST00000374301	1444	1476	0.29465	['chr1', 25832283, '+']	['chr1', 25832315, '+']
ENST00000374301	1492	1520	0.24075	['chr1', 25832331, '+']	['chr1', 25832359, '+']
ENST00000374301	1919	1952	0.27605	['chr1', 25832758, '+']	['chr1', 25832791, '+']
ENST00000374301	2041	2078	0.2477	['chr1', 25832880, '+']	['chr1', 25832917, '+']
ENST00000464008	420	478	0.2884	['chr1', 25820651, '+']	['chr1', 25823068, '+']
ENST00000464008	616	636	0.24273	['chr1', 25823315, '+']	['chr1', 25823655, '+']
ENST00000464008	968	993	0.23845	['chr1', 25826743, '+']	['chr1', 25826768, '+']
ENST00000464008	1123	1143	0.24095	['chr1', 25829580, '+']	['chr1', 25829600, '+']
ENST00000526158	209	267	0.2884	['chr1', 25820651, '+']	['chr1', 25823068, '+']
ENST00000526158	319	339	0.24273	['chr1', 25823120, '+']	['chr1', 25823655, '+']
ENST00000526158	671	696	0.23845	['chr1', 25826743, '+']	['chr1', 25826768, '+']
ENST00000530599	152	210	0.2884	['chr1', 25820913, '+']	['chr1', 25823068, '+']
ENST00000530599	348	368	0.24273	['chr1', 25823315, '+']	['chr1', 25823655, '+']
ENST00000530599	700	725	0.23845	['chr1', 25826743, '+']	['chr1', 25826768, '+']
ENST00000374300	168	226	0.2884	['chr1', 25820995, '+']	['chr1', 25823068, '+']
ENST00000374300	278	298	0.24273	['chr1', 25823120, '+']	['chr1', 25823655, '+']
ENST00000374300	630	655	0.23845	['chr1', 25826743, '+']	['chr1', 25826768, '+']
ENST00000374300	785	805	0.24095	['chr1', 25829580, '+']	['chr1', 25829600, '+']
ENST00000374300	1013	1035	0.24485	['chr1', 25829808, '+']	['chr1', 25829830, '+']
ENST00000374300	1036	1073	0.3039	['chr1', 25831921, '+']	['chr1', 25831958, '+']
ENST00000374300	1108	1132	0.23855	['chr1', 25831993, '+']	['chr1', 25832017, '+']
ENST00000374300	1244	1266	0.24035	['chr1', 25832129, '+']	['chr1', 25832151, '+']
ENST00000374300	1327	1355	0.36809	['chr1', 25832212, '+']	['chr1', 25832240, '+']
ENST00000374300	1363	1386	0.30209	['chr1', 25832248, '+']	['chr1', 25832271, '+']
ENST00000374300	1398	1430	0.29465	['chr1', 25832283, '+']	['chr1', 25832315, '+']
ENST00000374300	1446	1474	0.24075	['chr1', 25832331, '+']	['chr1', 25832359, '+']
ENST00000374300	1873	1906	0.27605	['chr1', 25832758, '+']	['chr1', 25832791, '+']
ENST00000374300	1995	2032	0.2477	['chr1', 25832880, '+']	['chr1', 25832917, '+']
ENST00000466284	1488	1546	0.2884	['chr1', 25823010, '+']	['chr1', 25823068, '+']
ENST00000466284	1598	1618	0.24273	['chr1', 25823120, '+']	['chr1', 25823655, '+']
ENST00000466284	1950	1975	0.23845	['chr1', 25826743, '+']	['chr1', 25826768, '+']
ENST00000466284	2224	2246	0.24485	['chr1', 25829808, '+']	['chr1', 25829830, '+']
ENST00000466284	2247	2284	0.3039	['chr1', 25831921, '+']	['chr1', 25831958, '+']
ENST00000466284	2319	2343	0.23855	['chr1', 25831993, '+']	['chr1', 25832017, '+']
ENST00000466284	2455	2477	0.24035	['chr1', 25832129, '+']	['chr1', 25832151, '+']
ENST00000466284	2538	2566	0.36809	['chr1', 25832212, '+']	['chr1', 25832240, '+']
ENST00000466284	2574	2597	0.30209	['chr1', 25832248, '+']	['chr1', 25832271, '+']
ENST00000466284	2609	2641	0.29465	['chr1', 25832283, '+']	['chr1', 25832315, '+']
ENST00000466284	2657	2685	0.24075	['chr1', 25832331, '+']	['chr1', 25832359, '+']
ENST00000466284	3084	3117	0.27605	['chr1', 25832758, '+']	['chr1', 25832791, '+']
ENST00000466284	3206	3238	0.26476	['chr1', 25832880, '+']	['chr1', 25832912, '+']
ENST00000531361	15	73	0.2884	['chr1', 25823010, '+']	['chr1', 25823068, '+']
ENST00000531361	125	145	0.24273	['chr1', 25823120, '+']	['chr1', 25823655, '+']
ENST00000531361	420	440	0.24095	['chr1', 25829580, '+']	['chr1', 25829600, '+']
ENST00000497956	1112	1137	0.23845	['chr1', 25826743, '+']	['chr1', 25826768, '+']
ENST00000497956	1267	1287	0.24095	['chr1', 25829580, '+']	['chr1', 25829600, '+']
ENST00000497956	1495	1517	0.24485	['chr1', 25829808, '+']	['chr1', 25829830, '+']
ENST00000497956	1518	1555	0.3039	['chr1', 25831921, '+']	['chr1', 25831958, '+']
ENST00000497956	1590	1614	0.23855	['chr1', 25831993, '+']	['chr1', 25832017, '+']
ENST00000497956	1726	1748	0.24035	['chr1', 25832129, '+']	['chr1', 25832151, '+']
ENST00000497956	1809	1837	0.36809	['chr1', 25832212, '+']	['chr1', 25832240, '+']
ENST00000497956	1845	1868	0.30209	['chr1', 25832248, '+']	['chr1', 25832271, '+']
ENST00000497956	1880	1912	0.29465	['chr1', 25832283, '+']	['chr1', 25832315, '+']
ENST00000497956	1928	1956	0.24075	['chr1', 25832331, '+']	['chr1', 25832359, '+']
ENST00000497956	2355	2388	0.27605	['chr1', 25832758, '+']	['chr1', 25832791, '+']
ENST00000497956	2477	2508	0.2538	['chr1', 25832880, '+']	['chr1', 25832911, '+']
ENST00000374266	555	574	0.23305	['chr1', 26170753, '+']	['chr1', 26170772, '+']
ENST00000374266	591	629	0.3227	['chr1', 26170789, '+']	['chr1', 26170827, '+']
ENST00000270812	578	597	0.23305	['chr1', 26170753, '+']	['chr1', 26170772, '+']
ENST00000270812	614	652	0.3227	['chr1', 26170789, '+']	['chr1', 26170827, '+']
ENST00000270792	987	1016	0.27805	['chr1', 26280162, '+']	['chr1', 26280191, '+']
ENST00000319041	41	70	0.27805	['chr1', 26280162, '+']	['chr1', 26280191, '+']
ENST00000374168	776	830	0.28318	['chr1', 26554604, '+']	['chr1', 26554658, '+']
ENST00000374168	870	896	0.25027	['chr1', 26554698, '+']	['chr1', 26554724, '+']
ENST00000374168	1142	1161	0.2312	['chr1', 26557004, '+']	['chr1', 26557023, '+']
ENST00000374168	1173	1211	0.31335	['chr1', 26557035, '+']	['chr1', 26557073, '+']
ENST00000374168	1334	1362	0.26165	['chr1', 26558902, '+']	['chr1', 26558930, '+']
ENST00000374168	1370	1396	0.288	['chr1', 26560726, '+']	['chr1', 26560752, '+']
ENST00000374168	1407	1460	0.34555	['chr1', 26560763, '+']	['chr1', 26560816, '+']
ENST00000374168	1774	1806	0.25125	['chr1', 26571478, '+']	['chr1', 26571510, '+']
ENST00000374168	1810	1847	0.31115	['chr1', 26571514, '+']	['chr1', 26571551, '+']
ENST00000374168	2074	2097	0.2386	['chr1', 26572266, '+']	['chr1', 26572289, '+']
ENST00000374168	2322	2343	0.2351	['chr1', 26574161, '+']	['chr1', 26574182, '+']
ENST00000374168	2600	2620	0.247	['chr1', 26574439, '+']	['chr1', 26574459, '+']
ENST00000374168	3055	3075	0.23595	['chr1', 26574894, '+']	['chr1', 26574914, '+']
ENST00000374168	3119	3165	0.26785	['chr1', 26574958, '+']	['chr1', 26575004, '+']
ENST00000374166	765	819	0.28318	['chr1', 26554604, '+']	['chr1', 26554658, '+']
ENST00000374166	859	885	0.25027	['chr1', 26554698, '+']	['chr1', 26554724, '+']
ENST00000374166	1098	1117	0.2312	['chr1', 26557004, '+']	['chr1', 26557023, '+']
ENST00000374166	1129	1167	0.31335	['chr1', 26557035, '+']	['chr1', 26557073, '+']
ENST00000374166	1290	1318	0.26165	['chr1', 26558902, '+']	['chr1', 26558930, '+']
ENST00000374166	1326	1352	0.288	['chr1', 26560726, '+']	['chr1', 26560752, '+']
ENST00000374166	1363	1416	0.34555	['chr1', 26560763, '+']	['chr1', 26560816, '+']
ENST00000374166	1730	1762	0.25125	['chr1', 26571478, '+']	['chr1', 26571510, '+']
ENST00000374166	1766	1803	0.31115	['chr1', 26571514, '+']	['chr1', 26571551, '+']
ENST00000374166	2030	2053	0.2386	['chr1', 26572266, '+']	['chr1', 26572289, '+']
ENST00000374166	2278	2299	0.2351	['chr1', 26574161, '+']	['chr1', 26574182, '+']
ENST00000374166	2556	2576	0.247	['chr1', 26574439, '+']	['chr1', 26574459, '+']
ENST00000374166	3011	3031	0.23595	['chr1', 26574894, '+']	['chr1', 26574914, '+']
ENST00000374166	3075	3095	0.24235	['chr1', 26574958, '+']	['chr1', 26574978, '+']
ENST00000526792	780	834	0.28318	['chr1', 26554604, '+']	['chr1', 26554658, '+']
ENST00000526792	874	900	0.25027	['chr1', 26554698, '+']	['chr1', 26554724, '+']
ENST00000526792	1146	1165	0.2312	['chr1', 26557004, '+']	['chr1', 26557023, '+']
ENST00000526792	1177	1215	0.31335	['chr1', 26557035, '+']	['chr1', 26557073, '+']
ENST00000526792	1338	1366	0.26165	['chr1', 26558902, '+']	['chr1', 26558930, '+']
ENST00000526792	1374	1400	0.288	['chr1', 26560726, '+']	['chr1', 26560752, '+']
ENST00000526792	1411	1464	0.34555	['chr1', 26560763, '+']	['chr1', 26560816, '+']
ENST00000526792	1778	1810	0.25125	['chr1', 26571478, '+']	['chr1', 26571510, '+']
ENST00000526792	1814	1851	0.31115	['chr1', 26571514, '+']	['chr1', 26571551, '+']
ENST00000526792	2078	2101	0.2386	['chr1', 26572266, '+']	['chr1', 26572289, '+']
ENST00000526792	2326	2347	0.2351	['chr1', 26574161, '+']	['chr1', 26574182, '+']
ENST00000530003	624	678	0.28318	['chr1', 26554604, '+']	['chr1', 26554658, '+']
ENST00000530003	718	744	0.25027	['chr1', 26554698, '+']	['chr1', 26554724, '+']
ENST00000530003	990	1009	0.2312	['chr1', 26557004, '+']	['chr1', 26557023, '+']
ENST00000530003	1021	1059	0.31335	['chr1', 26557035, '+']	['chr1', 26557073, '+']
ENST00000530003	1182	1210	0.26165	['chr1', 26558902, '+']	['chr1', 26558930, '+']
ENST00000530003	1218	1244	0.288	['chr1', 26560726, '+']	['chr1', 26560752, '+']
ENST00000530003	1255	1308	0.34555	['chr1', 26560763, '+']	['chr1', 26560816, '+']
ENST00000530003	1622	1654	0.25125	['chr1', 26571478, '+']	['chr1', 26571510, '+']
ENST00000530003	1658	1695	0.31115	['chr1', 26571514, '+']	['chr1', 26571551, '+']
ENST00000530003	1922	1945	0.2386	['chr1', 26572266, '+']	['chr1', 26572289, '+']
ENST00000530003	2170	2191	0.2351	['chr1', 26574161, '+']	['chr1', 26574182, '+']
ENST00000530003	2448	2468	0.247	['chr1', 26574439, '+']	['chr1', 26574459, '+']
ENST00000530003	2903	2923	0.23595	['chr1', 26574894, '+']	['chr1', 26574914, '+']
ENST00000530003	2967	2987	0.24235	['chr1', 26574958, '+']	['chr1', 26574978, '+']
ENST00000531113	574	628	0.28318	['chr1', 26554604, '+']	['chr1', 26554658, '+']
ENST00000531113	668	694	0.25027	['chr1', 26554698, '+']	['chr1', 26554724, '+']
ENST00000531113	940	959	0.2312	['chr1', 26557004, '+']	['chr1', 26557023, '+']
ENST00000531113	971	1009	0.31335	['chr1', 26557035, '+']	['chr1', 26557073, '+']
ENST00000531113	1132	1160	0.26165	['chr1', 26558902, '+']	['chr1', 26558930, '+']
ENST00000531113	1168	1194	0.288	['chr1', 26560726, '+']	['chr1', 26560752, '+']
ENST00000531113	1205	1258	0.34555	['chr1', 26560763, '+']	['chr1', 26560816, '+']
ENST00000531113	1572	1604	0.25125	['chr1', 26571478, '+']	['chr1', 26571510, '+']
ENST00000531113	1608	1645	0.31115	['chr1', 26571514, '+']	['chr1', 26571551, '+']
ENST00000374163	787	841	0.28318	['chr1', 26554604, '+']	['chr1', 26554658, '+']
ENST00000374163	881	907	0.25027	['chr1', 26554698, '+']	['chr1', 26554724, '+']
ENST00000374163	1153	1172	0.2312	['chr1', 26557004, '+']	['chr1', 26557023, '+']
ENST00000374163	1184	1222	0.31335	['chr1', 26557035, '+']	['chr1', 26557073, '+']
ENST00000374163	1345	1373	0.26165	['chr1', 26558902, '+']	['chr1', 26558930, '+']
ENST00000374163	1381	1407	0.288	['chr1', 26560726, '+']	['chr1', 26560752, '+']
ENST00000374163	1418	1471	0.34555	['chr1', 26560763, '+']	['chr1', 26560816, '+']
ENST00000374163	1785	1817	0.25125	['chr1', 26571478, '+']	['chr1', 26571510, '+']
ENST00000374163	1821	1858	0.31115	['chr1', 26571514, '+']	['chr1', 26571551, '+']
ENST00000374163	2085	2108	0.2386	['chr1', 26572266, '+']	['chr1', 26572289, '+']
ENST00000374163	2333	2354	0.2351	['chr1', 26574161, '+']	['chr1', 26574182, '+']
ENST00000374163	2611	2631	0.247	['chr1', 26574439, '+']	['chr1', 26574459, '+']
ENST00000374163	3066	3086	0.23595	['chr1', 26574894, '+']	['chr1', 26574914, '+']
ENST00000374163	3130	3167	0.26785	['chr1', 26574958, '+']	['chr1', 26574995, '+']
ENST00000531382	698	752	0.28318	['chr1', 26554604, '+']	['chr1', 26554658, '+']
ENST00000531382	792	818	0.25027	['chr1', 26554698, '+']	['chr1', 26554724, '+']
ENST00000531382	1064	1083	0.2312	['chr1', 26557004, '+']	['chr1', 26557023, '+']
ENST00000531382	1095	1133	0.31335	['chr1', 26557035, '+']	['chr1', 26557073, '+']
ENST00000531382	1256	1284	0.26165	['chr1', 26558902, '+']	['chr1', 26558930, '+']
ENST00000531382	1292	1318	0.288	['chr1', 26560726, '+']	['chr1', 26560752, '+']
ENST00000531382	1329	1382	0.34555	['chr1', 26560763, '+']	['chr1', 26560816, '+']
ENST00000531382	1696	1728	0.25125	['chr1', 26571478, '+']	['chr1', 26571510, '+']
ENST00000531382	1732	1769	0.31115	['chr1', 26571514, '+']	['chr1', 26571551, '+']
ENST00000531382	1996	2019	0.2386	['chr1', 26572266, '+']	['chr1', 26572289, '+']
ENST00000531382	2244	2265	0.2351	['chr1', 26574161, '+']	['chr1', 26574182, '+']
ENST00000403732	1	31	0.30525	['chr1', 26557043, '+']	['chr1', 26557073, '+']
ENST00000403732	154	182	0.26165	['chr1', 26558902, '+']	['chr1', 26558930, '+']
ENST00000438977	245	266	0.2351	['chr1', 26574161, '+']	['chr1', 26574182, '+']
ENST00000438977	344	364	0.247	['chr1', 26574439, '+']	['chr1', 26574459, '+']
ENST00000430799	420	440	0.25555	['chr1', 26729688, '+']	['chr1', 26729708, '+']
ENST00000430799	443	485	0.36255	['chr1', 26729711, '+']	['chr1', 26729753, '+']
ENST00000430799	601	668	0.28193	['chr1', 26731157, '+']	['chr1', 26731224, '+']
ENST00000430799	865	887	0.2372	['chr1', 26731421, '+']	['chr1', 26731443, '+']
ENST00000430799	894	936	0.3488	['chr1', 26731450, '+']	['chr1', 26731492, '+']
ENST00000430799	1056	1084	0.29564	['chr1', 26732683, '+']	['chr1', 26732711, '+']
ENST00000430799	1172	1191	0.24227	['chr1', 26760862, '+']	['chr1', 26760881, '+']
ENST00000430799	1224	1259	0.2945	['chr1', 26760914, '+']	['chr1', 26760949, '+']
ENST00000430799	1351	1403	0.34355	['chr1', 26761041, '+']	['chr1', 26761093, '+']
ENST00000430799	1488	1516	0.35773	['chr1', 26761465, '+']	['chr1', 26762171, '+']
ENST00000430799	1663	1685	0.26027	['chr1', 26762318, '+']	['chr1', 26762993, '+']
ENST00000430799	1720	1752	0.30182	['chr1', 26763028, '+']	['chr1', 26763060, '+']
ENST00000430799	2106	2130	0.26727	['chr1', 26766349, '+']	['chr1', 26766463, '+']
ENST00000430799	2343	2373	0.27745	['chr1', 26767899, '+']	['chr1', 26767929, '+']
ENST00000430799	2598	2617	0.24225	['chr1', 26771273, '+']	['chr1', 26771292, '+']
ENST00000430799	2680	2718	0.2805	['chr1', 26772528, '+']	['chr1', 26772566, '+']
ENST00000430799	2801	2843	0.37333	['chr1', 26772831, '+']	['chr1', 26772873, '+']
ENST00000430799	3121	3140	0.2412	['chr1', 26773592, '+']	['chr1', 26773611, '+']
ENST00000430799	3753	3780	0.2414	['chr1', 26774738, '+']	['chr1', 26774765, '+']
ENST00000430799	4277	4303	0.2462	['chr1', 26775618, '+']	['chr1', 26775644, '+']
ENST00000430799	4485	4507	0.25205	['chr1', 26779141, '+']	['chr1', 26779163, '+']
ENST00000430799	4572	4612	0.31745	['chr1', 26779228, '+']	['chr1', 26779268, '+']
ENST00000430799	6200	6239	0.2831	['chr1', 26780856, '+']	['chr1', 26780895, '+']
ENST00000430799	6271	6304	0.2821	['chr1', 26780927, '+']	['chr1', 26780960, '+']
ENST00000324856	956	991	0.30445	['chr1', 26696988, '+']	['chr1', 26697023, '+']
ENST00000324856	1546	1566	0.25555	['chr1', 26729688, '+']	['chr1', 26729708, '+']
ENST00000324856	1569	1611	0.36255	['chr1', 26729711, '+']	['chr1', 26729753, '+']
ENST00000324856	1727	1794	0.28193	['chr1', 26731157, '+']	['chr1', 26731224, '+']
ENST00000324856	1991	2013	0.2372	['chr1', 26731421, '+']	['chr1', 26731443, '+']
ENST00000324856	2020	2062	0.3488	['chr1', 26731450, '+']	['chr1', 26731492, '+']
ENST00000324856	2182	2210	0.29564	['chr1', 26732683, '+']	['chr1', 26732711, '+']
ENST00000324856	2298	2317	0.24227	['chr1', 26760862, '+']	['chr1', 26760881, '+']
ENST00000324856	2350	2385	0.2945	['chr1', 26760914, '+']	['chr1', 26760949, '+']
ENST00000324856	2477	2529	0.34355	['chr1', 26761041, '+']	['chr1', 26761093, '+']
ENST00000324856	2614	2642	0.35773	['chr1', 26761465, '+']	['chr1', 26762171, '+']
ENST00000324856	2789	2811	0.26027	['chr1', 26762318, '+']	['chr1', 26762993, '+']
ENST00000324856	2846	2878	0.30182	['chr1', 26763028, '+']	['chr1', 26763060, '+']
ENST00000324856	3232	3256	0.26727	['chr1', 26766349, '+']	['chr1', 26766463, '+']
ENST00000324856	3469	3499	0.27745	['chr1', 26767899, '+']	['chr1', 26767929, '+']
ENST00000324856	3724	3743	0.24225	['chr1', 26771273, '+']	['chr1', 26771292, '+']
ENST00000324856	3806	3844	0.2805	['chr1', 26772528, '+']	['chr1', 26772566, '+']
ENST00000324856	3930	3972	0.37333	['chr1', 26772831, '+']	['chr1', 26772873, '+']
ENST00000324856	4250	4269	0.2412	['chr1', 26773592, '+']	['chr1', 26773611, '+']
ENST00000324856	4882	4909	0.2414	['chr1', 26774738, '+']	['chr1', 26774765, '+']
ENST00000324856	5406	5432	0.2462	['chr1', 26775618, '+']	['chr1', 26775644, '+']
ENST00000324856	5614	5636	0.25205	['chr1', 26779141, '+']	['chr1', 26779163, '+']
ENST00000324856	5701	5741	0.31745	['chr1', 26779228, '+']	['chr1', 26779268, '+']
ENST00000324856	7329	7368	0.2831	['chr1', 26780856, '+']	['chr1', 26780895, '+']
ENST00000324856	7400	7433	0.2821	['chr1', 26780927, '+']	['chr1', 26780960, '+']
ENST00000324856	7715	7734	0.2341	['chr1', 26781242, '+']	['chr1', 26781261, '+']
ENST00000324856	7958	7995	0.2561	['chr1', 26781485, '+']	['chr1', 26781522, '+']
ENST00000324856	8079	8115	0.2817	['chr1', 26781606, '+']	['chr1', 26781642, '+']
ENST00000324856	8157	8178	0.2416	['chr1', 26781684, '+']	['chr1', 26781705, '+']
ENST00000457599	585	620	0.30445	['chr1', 26696988, '+']	['chr1', 26697023, '+']
ENST00000457599	1175	1195	0.25555	['chr1', 26729688, '+']	['chr1', 26729708, '+']
ENST00000457599	1198	1240	0.36255	['chr1', 26729711, '+']	['chr1', 26729753, '+']
ENST00000457599	1356	1423	0.28193	['chr1', 26731157, '+']	['chr1', 26731224, '+']
ENST00000457599	1620	1642	0.2372	['chr1', 26731421, '+']	['chr1', 26731443, '+']
ENST00000457599	1649	1691	0.3488	['chr1', 26731450, '+']	['chr1', 26731492, '+']
ENST00000457599	1811	1839	0.29564	['chr1', 26732683, '+']	['chr1', 26732711, '+']
ENST00000457599	1927	1946	0.24227	['chr1', 26760862, '+']	['chr1', 26760881, '+']
ENST00000457599	1979	2014	0.2945	['chr1', 26760914, '+']	['chr1', 26760949, '+']
ENST00000457599	2106	2158	0.34355	['chr1', 26761041, '+']	['chr1', 26761093, '+']
ENST00000457599	2243	2271	0.35773	['chr1', 26761465, '+']	['chr1', 26762171, '+']
ENST00000457599	2418	2440	0.26027	['chr1', 26762318, '+']	['chr1', 26762993, '+']
ENST00000457599	2475	2507	0.30182	['chr1', 26763028, '+']	['chr1', 26763060, '+']
ENST00000457599	2861	2885	0.26727	['chr1', 26766349, '+']	['chr1', 26766463, '+']
ENST00000457599	3098	3128	0.27745	['chr1', 26767899, '+']	['chr1', 26767929, '+']
ENST00000457599	3353	3372	0.24225	['chr1', 26771273, '+']	['chr1', 26771292, '+']
ENST00000457599	3435	3473	0.2805	['chr1', 26772528, '+']	['chr1', 26772566, '+']
ENST00000457599	3559	3601	0.37333	['chr1', 26772831, '+']	['chr1', 26772873, '+']
ENST00000457599	3879	3898	0.2412	['chr1', 26773592, '+']	['chr1', 26773611, '+']
ENST00000457599	4384	4410	0.2462	['chr1', 26775618, '+']	['chr1', 26775644, '+']
ENST00000457599	4592	4614	0.25205	['chr1', 26779141, '+']	['chr1', 26779163, '+']
ENST00000457599	4679	4719	0.31745	['chr1', 26779228, '+']	['chr1', 26779268, '+']
ENST00000374152	777	797	0.25555	['chr1', 26729688, '+']	['chr1', 26729708, '+']
ENST00000374152	800	842	0.36255	['chr1', 26729711, '+']	['chr1', 26729753, '+']
ENST00000374152	958	1025	0.28193	['chr1', 26731157, '+']	['chr1', 26731224, '+']
ENST00000374152	1222	1244	0.2372	['chr1', 26731421, '+']	['chr1', 26731443, '+']
ENST00000374152	1251	1293	0.3488	['chr1', 26731450, '+']	['chr1', 26731492, '+']
ENST00000374152	1413	1441	0.29564	['chr1', 26732683, '+']	['chr1', 26732711, '+']
ENST00000374152	1529	1548	0.24227	['chr1', 26760862, '+']	['chr1', 26760881, '+']
ENST00000374152	1581	1616	0.2945	['chr1', 26760914, '+']	['chr1', 26760949, '+']
ENST00000374152	1708	1760	0.34355	['chr1', 26761041, '+']	['chr1', 26761093, '+']
ENST00000374152	1845	1873	0.35773	['chr1', 26761465, '+']	['chr1', 26762171, '+']
ENST00000374152	2020	2042	0.26027	['chr1', 26762318, '+']	['chr1', 26762993, '+']
ENST00000374152	2077	2109	0.30182	['chr1', 26763028, '+']	['chr1', 26763060, '+']
ENST00000374152	2463	2487	0.26727	['chr1', 26766349, '+']	['chr1', 26766463, '+']
ENST00000374152	2700	2730	0.27745	['chr1', 26767899, '+']	['chr1', 26767929, '+']
ENST00000374152	2955	2974	0.24225	['chr1', 26771273, '+']	['chr1', 26771292, '+']
ENST00000374152	3037	3075	0.2805	['chr1', 26772528, '+']	['chr1', 26772566, '+']
ENST00000374152	3161	3203	0.37333	['chr1', 26772831, '+']	['chr1', 26772873, '+']
ENST00000374152	3481	3500	0.2412	['chr1', 26773592, '+']	['chr1', 26773611, '+']
ENST00000374152	4113	4140	0.2414	['chr1', 26774738, '+']	['chr1', 26774765, '+']
ENST00000374152	4637	4663	0.2462	['chr1', 26775618, '+']	['chr1', 26775644, '+']
ENST00000374152	4845	4867	0.25205	['chr1', 26779141, '+']	['chr1', 26779163, '+']
ENST00000374152	4932	4972	0.31745	['chr1', 26779228, '+']	['chr1', 26779268, '+']
ENST00000615191	309	329	0.25555	['chr1', 26729688, '+']	['chr1', 26729708, '+']
ENST00000615191	332	374	0.36255	['chr1', 26729711, '+']	['chr1', 26729753, '+']
ENST00000615191	490	557	0.28193	['chr1', 26731157, '+']	['chr1', 26731224, '+']
ENST00000615191	754	776	0.2372	['chr1', 26731421, '+']	['chr1', 26731443, '+']
ENST00000615191	783	825	0.3488	['chr1', 26731450, '+']	['chr1', 26731492, '+']
ENST00000615191	945	973	0.29564	['chr1', 26732683, '+']	['chr1', 26732711, '+']
ENST00000615191	1061	1080	0.24227	['chr1', 26760862, '+']	['chr1', 26760881, '+']
ENST00000615191	1113	1148	0.2945	['chr1', 26760914, '+']	['chr1', 26760949, '+']
ENST00000615191	1240	1292	0.34355	['chr1', 26761041, '+']	['chr1', 26761093, '+']
ENST00000615191	1377	1405	0.35773	['chr1', 26761465, '+']	['chr1', 26762171, '+']
ENST00000615191	1552	1574	0.26027	['chr1', 26762318, '+']	['chr1', 26762993, '+']
ENST00000615191	1609	1641	0.30182	['chr1', 26763028, '+']	['chr1', 26763060, '+']
ENST00000615191	1992	2016	0.26727	['chr1', 26766349, '+']	['chr1', 26766463, '+']
ENST00000615191	2229	2259	0.27745	['chr1', 26767899, '+']	['chr1', 26767929, '+']
ENST00000615191	2484	2503	0.24225	['chr1', 26771273, '+']	['chr1', 26771292, '+']
ENST00000615191	2566	2604	0.2805	['chr1', 26772528, '+']	['chr1', 26772566, '+']
ENST00000615191	2690	2732	0.37333	['chr1', 26772831, '+']	['chr1', 26772873, '+']
ENST00000615191	3010	3029	0.2412	['chr1', 26773592, '+']	['chr1', 26773611, '+']
ENST00000615191	3642	3669	0.2414	['chr1', 26774738, '+']	['chr1', 26774765, '+']
ENST00000636219	32	52	0.25555	['chr1', 26729688, '+']	['chr1', 26729708, '+']
ENST00000636219	55	97	0.36255	['chr1', 26729711, '+']	['chr1', 26729753, '+']
ENST00000636219	213	280	0.28193	['chr1', 26731157, '+']	['chr1', 26731224, '+']
ENST00000636219	477	499	0.2372	['chr1', 26731421, '+']	['chr1', 26731443, '+']
ENST00000636219	506	548	0.3488	['chr1', 26731450, '+']	['chr1', 26731492, '+']
ENST00000636219	668	696	0.29564	['chr1', 26732683, '+']	['chr1', 26732711, '+']
ENST00000636219	784	803	0.24227	['chr1', 26760862, '+']	['chr1', 26760881, '+']
ENST00000636219	836	871	0.2945	['chr1', 26760914, '+']	['chr1', 26760949, '+']
ENST00000636219	963	1015	0.34355	['chr1', 26761041, '+']	['chr1', 26761093, '+']
ENST00000636219	1100	1128	0.35773	['chr1', 26761465, '+']	['chr1', 26762171, '+']
ENST00000636219	1275	1297	0.26027	['chr1', 26762318, '+']	['chr1', 26762993, '+']
ENST00000636219	1332	1364	0.30182	['chr1', 26763028, '+']	['chr1', 26763060, '+']
ENST00000636219	1718	1742	0.26727	['chr1', 26766349, '+']	['chr1', 26766463, '+']
ENST00000636219	1955	1985	0.27745	['chr1', 26767899, '+']	['chr1', 26767929, '+']
ENST00000636219	2210	2229	0.24225	['chr1', 26771273, '+']	['chr1', 26771292, '+']
ENST00000636219	2292	2330	0.2805	['chr1', 26772528, '+']	['chr1', 26772566, '+']
ENST00000636219	2413	2455	0.37333	['chr1', 26772831, '+']	['chr1', 26772873, '+']
ENST00000636219	2733	2752	0.2412	['chr1', 26773592, '+']	['chr1', 26773611, '+']
ENST00000636219	3365	3392	0.2414	['chr1', 26774738, '+']	['chr1', 26774765, '+']
ENST00000636219	3889	3915	0.2462	['chr1', 26775618, '+']	['chr1', 26775644, '+']
ENST00000636219	4097	4119	0.25205	['chr1', 26779141, '+']	['chr1', 26779163, '+']
ENST00000636219	4184	4224	0.31745	['chr1', 26779228, '+']	['chr1', 26779268, '+']
ENST00000636219	5812	5851	0.2831	['chr1', 26780856, '+']	['chr1', 26780895, '+']
ENST00000636219	5883	5916	0.2821	['chr1', 26780927, '+']	['chr1', 26780960, '+']
ENST00000636219	6198	6217	0.2341	['chr1', 26781242, '+']	['chr1', 26781261, '+']
ENST00000636219	6441	6478	0.2561	['chr1', 26781485, '+']	['chr1', 26781522, '+']
ENST00000636219	6562	6598	0.2817	['chr1', 26781606, '+']	['chr1', 26781642, '+']
ENST00000636219	6640	6661	0.2416	['chr1', 26781684, '+']	['chr1', 26781705, '+']
ENST00000430291	1	22	0.25907	['chr1', 26766270, '+']	['chr1', 26766291, '+']
ENST00000430291	80	104	0.26727	['chr1', 26766349, '+']	['chr1', 26766373, '+']
ENST00000430291	407	437	0.27745	['chr1', 26767899, '+']	['chr1', 26767929, '+']
ENST00000636072	254	291	0.25536	['chr1', 26773574, '+']	['chr1', 26773611, '+']
ENST00000636072	904	931	0.2414	['chr1', 26774738, '+']	['chr1', 26774765, '+']
ENST00000466382	188	207	0.2412	['chr1', 26773592, '+']	['chr1', 26773611, '+']
ENST00000466382	452	478	0.2462	['chr1', 26775618, '+']	['chr1', 26775644, '+']
ENST00000466382	660	682	0.25205	['chr1', 26779141, '+']	['chr1', 26779163, '+']
ENST00000466382	747	787	0.31745	['chr1', 26779228, '+']	['chr1', 26779268, '+']
ENST00000466382	2375	2414	0.2831	['chr1', 26780856, '+']	['chr1', 26780895, '+']
ENST00000466382	2446	2479	0.2821	['chr1', 26780927, '+']	['chr1', 26780960, '+']
ENST00000636794	185	204	0.2412	['chr1', 26773592, '+']	['chr1', 26773611, '+']
ENST00000636794	905	932	0.2414	['chr1', 26774738, '+']	['chr1', 26774765, '+']
ENST00000532781	393	419	0.2462	['chr1', 26775618, '+']	['chr1', 26775644, '+']
ENST00000532781	741	763	0.25205	['chr1', 26779141, '+']	['chr1', 26779163, '+']
ENST00000532781	828	868	0.31745	['chr1', 26779228, '+']	['chr1', 26779268, '+']
ENST00000532781	2456	2495	0.2831	['chr1', 26780856, '+']	['chr1', 26780895, '+']
ENST00000532781	2527	2562	0.31947	['chr1', 26780927, '+']	['chr1', 26780962, '+']
ENST00000637788	1043	1065	0.25205	['chr1', 26779141, '+']	['chr1', 26779163, '+']
ENST00000637788	1130	1170	0.31745	['chr1', 26779228, '+']	['chr1', 26779268, '+']
ENST00000637788	2758	2797	0.2831	['chr1', 26780856, '+']	['chr1', 26780895, '+']
ENST00000637788	2829	2862	0.2821	['chr1', 26780927, '+']	['chr1', 26780960, '+']
ENST00000374141	115	152	0.25	['chr1', 26832511, '+']	['chr1', 26832548, '+']
ENST00000374141	793	821	0.25715	['chr1', 26853754, '+']	['chr1', 26853782, '+']
ENST00000374141	837	858	0.245	['chr1', 26853798, '+']	['chr1', 26853819, '+']
ENST00000374141	868	904	0.26685	['chr1', 26853829, '+']	['chr1', 26853865, '+']
ENST00000534643	118	155	0.25	['chr1', 26832511, '+']	['chr1', 26832548, '+']
ENST00000321265	62	81	0.2316	['chr1', 26921787, '+']	['chr1', 26921806, '+']
ENST00000321265	177	201	0.2536	['chr1', 26921902, '+']	['chr1', 26921926, '+']
ENST00000319394	838	874	0.24445	['chr1', 27287685, '+']	['chr1', 27287721, '+']
ENST00000319394	1050	1076	0.29292	['chr1', 27292250, '+']	['chr1', 27292276, '+']
ENST00000319394	1169	1202	0.2633	['chr1', 27292369, '+']	['chr1', 27294026, '+']
ENST00000319394	1292	1319	0.26573	['chr1', 27294116, '+']	['chr1', 27294540, '+']
ENST00000319394	1597	1623	0.25455	['chr1', 27297941, '+']	['chr1', 27297967, '+']
ENST00000319394	1628	1655	0.25665	['chr1', 27297972, '+']	['chr1', 27297999, '+']
ENST00000319394	1675	1706	0.25495	['chr1', 27298019, '+']	['chr1', 27298050, '+']
ENST00000319394	1737	1773	0.27335	['chr1', 27298081, '+']	['chr1', 27301231, '+']
ENST00000361771	686	722	0.24445	['chr1', 27287685, '+']	['chr1', 27287721, '+']
ENST00000361771	898	924	0.29292	['chr1', 27292250, '+']	['chr1', 27292276, '+']
ENST00000361771	1017	1050	0.2633	['chr1', 27292369, '+']	['chr1', 27294026, '+']
ENST00000361771	1140	1167	0.26573	['chr1', 27294116, '+']	['chr1', 27294540, '+']
ENST00000361771	1442	1468	0.25455	['chr1', 27297941, '+']	['chr1', 27297967, '+']
ENST00000361771	1473	1500	0.25665	['chr1', 27297972, '+']	['chr1', 27297999, '+']
ENST00000361771	1520	1551	0.25495	['chr1', 27298019, '+']	['chr1', 27298050, '+']
ENST00000361771	1582	1618	0.27335	['chr1', 27298081, '+']	['chr1', 27301231, '+']
ENST00000447062	310	346	0.24445	['chr1', 27287685, '+']	['chr1', 27287721, '+']
ENST00000447062	522	548	0.29292	['chr1', 27292250, '+']	['chr1', 27292276, '+']
ENST00000447062	641	674	0.2633	['chr1', 27292369, '+']	['chr1', 27294026, '+']
ENST00000447062	764	791	0.26573	['chr1', 27294116, '+']	['chr1', 27294540, '+']
ENST00000447062	1069	1095	0.25455	['chr1', 27297941, '+']	['chr1', 27297967, '+']
ENST00000447062	1100	1127	0.25665	['chr1', 27297972, '+']	['chr1', 27297999, '+']
ENST00000447062	1147	1178	0.25495	['chr1', 27298019, '+']	['chr1', 27298050, '+']
ENST00000447062	1209	1245	0.27335	['chr1', 27298081, '+']	['chr1', 27301231, '+']
ENST00000491239	189	215	0.29292	['chr1', 27292250, '+']	['chr1', 27292276, '+']
ENST00000491239	308	341	0.2633	['chr1', 27292369, '+']	['chr1', 27294026, '+']
ENST00000491239	431	458	0.26573	['chr1', 27294116, '+']	['chr1', 27294540, '+']
ENST00000491239	736	762	0.25455	['chr1', 27297941, '+']	['chr1', 27297967, '+']
ENST00000491239	767	794	0.25665	['chr1', 27297972, '+']	['chr1', 27297999, '+']
ENST00000491239	814	845	0.25495	['chr1', 27298019, '+']	['chr1', 27298050, '+']
ENST00000491239	876	912	0.27335	['chr1', 27298081, '+']	['chr1', 27301231, '+']
ENST00000611517	187	208	0.24245	['chr1', 27322331, '+']	['chr1', 27322352, '+']
ENST00000611517	573	611	0.23165	['chr1', 27334262, '+']	['chr1', 27335397, '+']
ENST00000611517	637	660	0.24395	['chr1', 27335423, '+']	['chr1', 27335446, '+']
ENST00000374076	172	193	0.24245	['chr1', 27322331, '+']	['chr1', 27322352, '+']
ENST00000374076	558	596	0.23165	['chr1', 27334262, '+']	['chr1', 27335397, '+']
ENST00000374076	622	645	0.24395	['chr1', 27335423, '+']	['chr1', 27335446, '+']
ENST00000464720	85	106	0.24245	['chr1', 27322331, '+']	['chr1', 27322352, '+']
ENST00000464720	624	662	0.23165	['chr1', 27334262, '+']	['chr1', 27335397, '+']
ENST00000464720	688	711	0.24395	['chr1', 27335423, '+']	['chr1', 27335446, '+']
ENST00000608611	84	105	0.24245	['chr1', 27322331, '+']	['chr1', 27322352, '+']
ENST00000608611	470	508	0.23165	['chr1', 27334262, '+']	['chr1', 27335397, '+']
ENST00000608611	534	557	0.24395	['chr1', 27335423, '+']	['chr1', 27335446, '+']
ENST00000466759	78	99	0.24245	['chr1', 27322331, '+']	['chr1', 27322352, '+']
ENST00000486082	78	99	0.24245	['chr1', 27322331, '+']	['chr1', 27322352, '+']
ENST00000486082	617	640	0.23165	['chr1', 27334262, '+']	['chr1', 27334670, '+']
ENST00000486082	720	743	0.24855	['chr1', 27334750, '+']	['chr1', 27335397, '+']
ENST00000486082	769	792	0.24395	['chr1', 27335423, '+']	['chr1', 27335446, '+']
ENST00000464813	51	72	0.24245	['chr1', 27322331, '+']	['chr1', 27322352, '+']
ENST00000464813	437	460	0.23165	['chr1', 27334262, '+']	['chr1', 27334285, '+']
[truncated: 119,482 more rows]

## Sheet: HEK293FT_vs_K562
transcript_id	start_coordinate	stop_coordinate	L1_distance	genomeCoor_start	genomeCoor_end
ENST00000338591	342	369	0.2406	['chr1', 961881, '+']	['chr1', 961925, '+']
ENST00000338591	377	409	0.2709	['chr1', 962001, '+']	['chr1', 962455, '+']
ENST00000338591	460	497	0.3141	['chr1', 962458, '+']	['chr1', 962716, '+']
ENST00000338591	528	571	0.2587	['chr1', 962724, '+']	['chr1', 962745, '+']
ENST00000338591	644	689	0.3415	['chr1', 963189, '+']	['chr1', 963244, '+']
ENST00000338591	783	802	0.24005	['chr1', 964467, '+']	['chr1', 964487, '+']
ENST00000338591	840	882	0.31435	['chr1', 964988, '+']	['chr1', 965009, '+']
ENST00000338591	976	999	0.25045	['chr1', 962352, '+']	['chr1', 962455, '+']
ENST00000338591	1004	1033	0.24545	['chr1', 962458, '+']	['chr1', 962716, '+']
ENST00000338591	1153	1178	0.2632	['chr1', 962724, '+']	['chr1', 962745, '+']
ENST00000338591	1187	1209	0.24125	['chr1', 963189, '+']	['chr1', 963244, '+']
ENST00000338591	1263	1316	0.3232	['chr1', 964467, '+']	['chr1', 964487, '+']
ENST00000338591	1455	1474	0.23275	['chr1', 964988, '+']	['chr1', 965009, '+']
ENST00000338591	1482	1502	0.24085	['chr1', 961620, '+']	['chr1', 961642, '+']
ENST00000338591	1610	1629	0.2352	['chr1', 961881, '+']	['chr1', 961925, '+']
ENST00000622660	300	328	0.2501	['chr1', 962001, '+']	['chr1', 962047, '+']
ENST00000622660	356	398	0.31435	['chr1', 962352, '+']	['chr1', 962457, '+']
ENST00000622660	492	515	0.25045	['chr1', 963069, '+']	['chr1', 963094, '+']
ENST00000622660	520	549	0.24545	['chr1', 963189, '+']	['chr1', 963244, '+']
ENST00000622660	669	694	0.2632	['chr1', 964467, '+']	['chr1', 964487, '+']
ENST00000622660	703	725	0.24125	['chr1', 963603, '+']	['chr1', 963644, '+']
ENST00000622660	779	832	0.3232	['chr1', 1013987, '+']	['chr1', 1014018, '+']
ENST00000622660	971	990	0.23275	['chr1', 1014104, '+']	['chr1', 1014149, '+']
ENST00000622660	998	1018	0.24085	['chr1', 1014443, '+']	['chr1', 1014463, '+']
ENST00000463212	7	39	0.2709	['chr1', 1041182, '+']	['chr1', 1041212, '+']
ENST00000463212	172	203	0.29453	['chr1', 1041219, '+']	['chr1', 1041239, '+']
ENST00000463212	234	277	0.2587	['chr1', 1041540, '+']	['chr1', 1041561, '+']
ENST00000463212	350	395	0.3415	['chr1', 1041613, '+']	['chr1', 1041646, '+']
ENST00000463212	489	508	0.24005	['chr1', 1041956, '+']	['chr1', 1042004, '+']
ENST00000463212	797	825	0.2501	['chr1', 1042081, '+']	['chr1', 1042101, '+']
ENST00000463212	853	895	0.31435	['chr1', 1043285, '+']	['chr1', 1043304, '+']
ENST00000466300	18	41	0.25045	['chr1', 1043591, '+']	['chr1', 1043611, '+']
ENST00000466300	46	75	0.24545	['chr1', 1043650, '+']	['chr1', 1043682, '+']
ENST00000466300	176	195	0.23145	['chr1', 1043718, '+']	['chr1', 1043862, '+']
ENST00000466300	272	297	0.2632	['chr1', 1043974, '+']	['chr1', 1044023, '+']
ENST00000466300	306	328	0.24125	['chr1', 1044222, '+']	['chr1', 1044252, '+']
ENST00000466300	382	435	0.3232	['chr1', 1045180, '+']	['chr1', 1045206, '+']
ENST00000466300	574	593	0.23275	['chr1', 1045477, '+']	['chr1', 1045498, '+']
ENST00000466300	601	621	0.24085	['chr1', 1045980, '+']	['chr1', 1046034, '+']
ENST00000481067	25	66	0.29518	['chr1', 1046165, '+']	['chr1', 1046195, '+']
ENST00000481067	78	134	0.3912	['chr1', 1046423, '+']	['chr1', 1046474, '+']
ENST00000481067	332	362	0.27854	['chr1', 1046613, '+']	['chr1', 1046657, '+']
ENST00000481067	388	408	0.24085	['chr1', 1046669, '+']	['chr1', 1046698, '+']
ENST00000379389	158	190	0.35283	['chr1', 1046700, '+']	['chr1', 1046730, '+']
ENST00000379389	248	303	0.30985	['chr1', 1046825, '+']	['chr1', 1046858, '+']
ENST00000379389	328	349	0.2543	['chr1', 1046884, '+']	['chr1', 1046903, '+']
ENST00000379389	422	441	0.23105	['chr1', 1046950, '+']	['chr1', 1047354, '+']
ENST00000379389	544	582	0.28005	['chr1', 1047439, '+']	['chr1', 1047580, '+']
ENST00000379389	609	690	0.37592	['chr1', 1048071, '+']	['chr1', 1048107, '+']
ENST00000379370	374	393	0.23105	['chr1', 1048260, '+']	['chr1', 1048281, '+']
ENST00000379370	1554	1579	0.24775	['chr1', 1049749, '+']	['chr1', 1049776, '+']
ENST00000379370	1772	1805	0.2981	['chr1', 1050007, '+']	['chr1', 1050036, '+']
ENST00000379370	1832	1867	0.2889	['chr1', 1050304, '+']	['chr1', 1050328, '+']
ENST00000379370	2004	2045	0.24595	['chr1', 1050431, '+']	['chr1', 1050459, '+']
ENST00000379370	2223	2257	0.30045	['chr1', 1050503, '+']	['chr1', 1050530, '+']
ENST00000379370	2550	2594	0.23775	['chr1', 1050561, '+']	['chr1', 1050584, '+']
ENST00000379370	2675	2695	0.2538	['chr1', 1051330, '+']	['chr1', 1051349, '+']
ENST00000379370	2781	2805	0.2484	['chr1', 1051630, '+']	['chr1', 1051738, '+']
ENST00000379370	2835	2877	0.29155	['chr1', 1053955, '+']	['chr1', 1054458, '+']
ENST00000379370	2992	3045	0.37695	['chr1', 1054931, '+']	['chr1', 1054960, '+']
ENST00000379370	3065	3107	0.33345	['chr1', 1041182, '+']	['chr1', 1041212, '+']
ENST00000379370	3145	3180	0.27655	['chr1', 1041219, '+']	['chr1', 1041239, '+']
ENST00000379370	3241	3277	0.25385	['chr1', 1041540, '+']	['chr1', 1041561, '+']
ENST00000379370	3304	3323	0.23695	['chr1', 1041613, '+']	['chr1', 1041646, '+']
ENST00000379370	3371	3392	0.2338	['chr1', 1041956, '+']	['chr1', 1042004, '+']
ENST00000379370	3432	3468	0.31657	['chr1', 1042081, '+']	['chr1', 1042101, '+']
ENST00000379370	3723	3747	0.2635	['chr1', 1043285, '+']	['chr1', 1043304, '+']
ENST00000379370	3787	3807	0.24591	['chr1', 1043591, '+']	['chr1', 1043611, '+']
ENST00000379370	4142	4165	0.23881	['chr1', 1043650, '+']	['chr1', 1043682, '+']
ENST00000379370	4743	4772	0.2767	['chr1', 1043718, '+']	['chr1', 1043862, '+']
ENST00000379370	4899	4938	0.30033	['chr1', 1043974, '+']	['chr1', 1044023, '+']
ENST00000379370	5115	5134	0.23115	['chr1', 1044222, '+']	['chr1', 1044252, '+']
ENST00000379370	5300	5331	0.3143	['chr1', 1045180, '+']	['chr1', 1045206, '+']
ENST00000379370	5386	5410	0.261	['chr1', 1045477, '+']	['chr1', 1045498, '+']
ENST00000379370	5894	5913	0.2319	['chr1', 1045980, '+']	['chr1', 1046034, '+']
ENST00000379370	5918	5956	0.28	['chr1', 1046165, '+']	['chr1', 1046195, '+']
ENST00000379370	6145	6164	0.23105	['chr1', 1046423, '+']	['chr1', 1046474, '+']
ENST00000379370	6368	6406	0.2714	['chr1', 1046613, '+']	['chr1', 1046657, '+']
ENST00000379370	6759	6791	0.2684	['chr1', 1046669, '+']	['chr1', 1046698, '+']
ENST00000379370	6985	7012	0.2587	['chr1', 1046700, '+']	['chr1', 1046730, '+']
ENST00000379370	7126	7157	0.2784	['chr1', 1046825, '+']	['chr1', 1046858, '+']
ENST00000620552	374	393	0.23105	['chr1', 1046884, '+']	['chr1', 1046903, '+']
ENST00000620552	1554	1579	0.24775	['chr1', 1046950, '+']	['chr1', 1047354, '+']
ENST00000620552	1772	1805	0.2981	['chr1', 1047439, '+']	['chr1', 1047580, '+']
ENST00000620552	1832	1867	0.2889	['chr1', 1048071, '+']	['chr1', 1048107, '+']
ENST00000620552	2004	2045	0.24595	['chr1', 1048260, '+']	['chr1', 1048281, '+']
ENST00000620552	2223	2257	0.30045	['chr1', 1049749, '+']	['chr1', 1049776, '+']
ENST00000620552	2550	2594	0.23775	['chr1', 1050007, '+']	['chr1', 1050036, '+']
ENST00000620552	2675	2695	0.2538	['chr1', 1050304, '+']	['chr1', 1050328, '+']
ENST00000620552	2781	2805	0.2484	['chr1', 1050431, '+']	['chr1', 1050459, '+']
ENST00000620552	2835	2877	0.29155	['chr1', 1050503, '+']	['chr1', 1050530, '+']
ENST00000620552	2992	3045	0.37695	['chr1', 1050561, '+']	['chr1', 1050584, '+']
ENST00000620552	3065	3107	0.33345	['chr1', 1051330, '+']	['chr1', 1051349, '+']
ENST00000620552	3145	3180	0.27655	['chr1', 1051630, '+']	['chr1', 1051738, '+']
ENST00000620552	3241	3277	0.25385	['chr1', 1053955, '+']	['chr1', 1054458, '+']
ENST00000620552	3304	3323	0.23695	['chr1', 1054931, '+']	['chr1', 1054960, '+']
ENST00000620552	3371	3392	0.2338	['chr1', 1041182, '+']	['chr1', 1041212, '+']
ENST00000620552	3432	3468	0.31657	['chr1', 1041219, '+']	['chr1', 1041239, '+']
ENST00000620552	3723	3747	0.2635	['chr1', 1045477, '+']	['chr1', 1045498, '+']
ENST00000620552	3787	3807	0.24591	['chr1', 1045980, '+']	['chr1', 1046034, '+']
ENST00000620552	4142	4165	0.23881	['chr1', 1046165, '+']	['chr1', 1046195, '+']
ENST00000620552	4743	4772	0.2767	['chr1', 1047323, '+']	['chr1', 1047354, '+']
ENST00000620552	4899	4938	0.30033	['chr1', 1047439, '+']	['chr1', 1047580, '+']
ENST00000620552	5115	5134	0.23115	['chr1', 1050561, '+']	['chr1', 1050584, '+']
ENST00000620552	5307	5343	0.3143	['chr1', 1051330, '+']	['chr1', 1051349, '+']
ENST00000620552	5398	5422	0.261	['chr1', 1051630, '+']	['chr1', 1051738, '+']
ENST00000620552	5963	5982	0.2319	['chr1', 1053955, '+']	['chr1', 1054458, '+']
ENST00000620552	5987	6025	0.28	['chr1', 1054931, '+']	['chr1', 1054960, '+']
ENST00000620552	6214	6233	0.23105	['chr1', 1232540, '+']	['chr1', 1232576, '+']
ENST00000620552	6437	6475	0.2714	['chr1', 1232611, '+']	['chr1', 1232633, '+']
ENST00000620552	6828	6860	0.2684	['chr1', 1233403, '+']	['chr1', 1233429, '+']
ENST00000620552	7054	7081	0.2587	['chr1', 1233610, '+']	['chr1', 1233629, '+']
ENST00000620552	7195	7226	0.2784	['chr1', 1234332, '+']	['chr1', 1234382, '+']
ENST00000479707	89	133	0.23775	['chr1', 1234587, '+']	['chr1', 1234611, '+']
ENST00000479707	214	234	0.2538	['chr1', 1234740, '+']	['chr1', 1234783, '+']
ENST00000479707	320	344	0.2484	['chr1', 1234834, '+']	['chr1', 1234858, '+']
ENST00000479707	374	416	0.29155	['chr1', 1234927, '+']	['chr1', 1234946, '+']
ENST00000466223	123	156	0.34127	['chr1', 1308675, '+']	['chr1', 1308711, '+']
ENST00000466223	411	438	0.24811	['chr1', 1308675, '+']	['chr1', 1308711, '+']
ENST00000419249	8	27	0.23115	['chr1', 1325017, '+']	['chr1', 1325046, '+']
ENST00000419249	200	236	0.3143	['chr1', 1325098, '+']	['chr1', 1327255, '+']
ENST00000419249	291	315	0.261	['chr1', 1325017, '+']	['chr1', 1325046, '+']
ENST00000461111	1960	1979	0.2319	['chr1', 1326952, '+']	['chr1', 1326986, '+']
ENST00000461111	1984	2022	0.28	['chr1', 1326994, '+']	['chr1', 1327013, '+']
ENST00000461111	2211	2230	0.23105	['chr1', 1327028, '+']	['chr1', 1327258, '+']
ENST00000461111	2434	2472	0.2714	['chr1', 1328002, '+']	['chr1', 1328024, '+']
ENST00000461111	2825	2857	0.2684	['chr1', 1400221, '+']	['chr1', 1400253, '+']
ENST00000461111	3051	3078	0.2587	['chr1', 1400262, '+']	['chr1', 1400614, '+']
ENST00000461111	3192	3223	0.2784	['chr1', 1400627, '+']	['chr1', 1400649, '+']
ENST00000418300	129	167	0.2714	['chr1', 1400824, '+']	['chr1', 1400850, '+']
ENST00000418300	205	236	0.2784	['chr1', 1400886, '+']	['chr1', 1400907, '+']
ENST00000379198	34	101	0.3096	['chr1', 1400993, '+']	['chr1', 1401025, '+']
ENST00000379198	131	157	0.2339	['chr1', 1400221, '+']	['chr1', 1400253, '+']
ENST00000379198	187	217	0.35492	['chr1', 1400262, '+']	['chr1', 1400614, '+']
ENST00000379198	785	804	0.23835	['chr1', 1400627, '+']	['chr1', 1400649, '+']
ENST00000379198	1202	1224	0.24355	['chr1', 1400824, '+']	['chr1', 1400850, '+']
ENST00000379198	1329	1356	0.2845	['chr1', 1400886, '+']	['chr1', 1400907, '+']
ENST00000379198	1431	1465	0.32869	['chr1', 1400993, '+']	['chr1', 1401025, '+']
ENST00000379198	1483	1513	0.26935	['chr1', 1401309, '+']	['chr1', 1401391, '+']
ENST00000379198	2017	2047	0.24572	['chr1', 1401679, '+']	['chr1', 1401712, '+']
ENST00000379198	2079	2119	0.27705	['chr1', 1400221, '+']	['chr1', 1400253, '+']
ENST00000379198	2152	2178	0.23626	['chr1', 1400262, '+']	['chr1', 1400614, '+']
ENST00000379198	2254	2287	0.2554	['chr1', 1400627, '+']	['chr1', 1400649, '+']
ENST00000379198	2395	2433	0.26625	['chr1', 1400824, '+']	['chr1', 1400850, '+']
ENST00000379198	2483	2541	0.28735	['chr1', 1400886, '+']	['chr1', 1400907, '+']
ENST00000379198	2574	2596	0.24315	['chr1', 1400993, '+']	['chr1', 1401025, '+']
ENST00000379198	2633	2667	0.29615	['chr1', 1401309, '+']	['chr1', 1401391, '+']
ENST00000379198	2669	2721	0.29995	['chr1', 1401679, '+']	['chr1', 1401712, '+']
ENST00000379031	92	145	0.26925	['chr1', 1400221, '+']	['chr1', 1400253, '+']
ENST00000379031	151	218	0.38107	['chr1', 1400262, '+']	['chr1', 1400614, '+']
ENST00000470520	48	101	0.26925	['chr1', 1400627, '+']	['chr1', 1400649, '+']
ENST00000463758	119	191	0.38107	['chr1', 1400824, '+']	['chr1', 1400850, '+']
ENST00000463758	900	919	0.245	['chr1', 1400886, '+']	['chr1', 1400907, '+']
ENST00000467712	86	158	0.38107	['chr1', 1400993, '+']	['chr1', 1401025, '+']
ENST00000493657	1	21	0.24567	['chr1', 1401309, '+']	['chr1', 1401391, '+']
ENST00000464957	279	301	0.23305	['chr1', 1401679, '+']	['chr1', 1401712, '+']
ENST00000464957	605	626	0.24565	['chr1', 1400221, '+']	['chr1', 1400253, '+']
ENST00000464957	721	755	0.26805	['chr1', 1400262, '+']	['chr1', 1400308, '+']
ENST00000343938	268	290	0.23305	['chr1', 1400627, '+']	['chr1', 1400649, '+']
ENST00000343938	791	812	0.24565	['chr1', 1400824, '+']	['chr1', 1400850, '+']
ENST00000343938	907	941	0.26805	['chr1', 1400886, '+']	['chr1', 1400907, '+']
ENST00000448629	217	273	0.3395	['chr1', 1400993, '+']	['chr1', 1401025, '+']
ENST00000448629	288	366	0.36638	['chr1', 1401309, '+']	['chr1', 1401391, '+']
ENST00000448629	540	581	0.25345	['chr1', 1401679, '+']	['chr1', 1401712, '+']
ENST00000448629	636	668	0.24455	['chr1', 1401309, '+']	['chr1', 1401391, '+']
ENST00000448629	691	716	0.2765	['chr1', 1401679, '+']	['chr1', 1401712, '+']
ENST00000444362	208	264	0.3395	['chr1', 1435706, '+']	['chr1', 1435728, '+']
ENST00000444362	279	357	0.36638	['chr1', 1439097, '+']	['chr1', 1439124, '+']
ENST00000444362	531	572	0.25345	['chr1', 1439332, '+']	['chr1', 1439355, '+']
ENST00000444362	627	659	0.24455	['chr1', 1439463, '+']	['chr1', 1439486, '+']
ENST00000444362	682	707	0.2765	['chr1', 1439641, '+']	['chr1', 1439671, '+']
ENST00000444362	1021	1103	0.3602	['chr1', 1435706, '+']	['chr1', 1435728, '+']
ENST00000444362	1236	1283	0.27035	['chr1', 1437146, '+']	['chr1', 1437167, '+']
ENST00000444362	1366	1416	0.37291	['chr1', 1439097, '+']	['chr1', 1439124, '+']
ENST00000444362	1597	1630	0.45582	['chr1', 1439332, '+']	['chr1', 1439355, '+']
ENST00000418833	677	733	0.3395	['chr1', 1439463, '+']	['chr1', 1439486, '+']
ENST00000418833	748	826	0.36638	['chr1', 1439641, '+']	['chr1', 1439671, '+']
ENST00000418833	1000	1041	0.25345	['chr1', 1437146, '+']	['chr1', 1437167, '+']
ENST00000418833	1096	1128	0.24455	['chr1', 1471877, '+']	['chr1', 1471903, '+']
ENST00000418833	1151	1176	0.2765	['chr1', 1490630, '+']	['chr1', 1490667, '+']
ENST00000418833	1490	1572	0.3602	['chr1', 1495856, '+']	['chr1', 1495898, '+']
ENST00000418833	1705	1752	0.27035	['chr1', 1478262, '+']	['chr1', 1478326, '+']
ENST00000418833	1835	1885	0.37291	['chr1', 1490630, '+']	['chr1', 1490667, '+']
ENST00000418833	2066	2099	0.45582	['chr1', 1495856, '+']	['chr1', 1495898, '+']
ENST00000447725	344	400	0.3395	['chr1', 1490630, '+']	['chr1', 1490667, '+']
ENST00000447725	415	493	0.36638	['chr1', 1495856, '+']	['chr1', 1495898, '+']
ENST00000447725	667	708	0.25345	['chr1', 1490630, '+']	['chr1', 1490667, '+']
ENST00000447725	763	795	0.24455	['chr1', 1495856, '+']	['chr1', 1495898, '+']
ENST00000447725	818	843	0.2765	['chr1', 1512344, '+']	['chr1', 1512378, '+']
ENST00000447725	1157	1239	0.3602	['chr1', 1522852, '+']	['chr1', 1522872, '+']
ENST00000447725	1372	1419	0.27035	['chr1', 1534136, '+']	['chr1', 1534162, '+']
ENST00000447725	1502	1552	0.37291	['chr1', 1512344, '+']	['chr1', 1512378, '+']
ENST00000447725	1733	1766	0.45582	['chr1', 1522852, '+']	['chr1', 1522872, '+']
ENST00000572242	401	457	0.3395	['chr1', 1534136, '+']	['chr1', 1534162, '+']
ENST00000572242	472	504	0.26541	['chr1', 1522852, '+']	['chr1', 1522872, '+']
ENST00000572242	792	851	0.3035	['chr1', 1534136, '+']	['chr1', 1534162, '+']
ENST00000572242	1025	1066	0.25345	['chr1', 1522852, '+']	['chr1', 1522872, '+']
ENST00000572242	1121	1153	0.24455	['chr1', 1534136, '+']	['chr1', 1534162, '+']
ENST00000572242	1176	1201	0.2765	['chr1', 1628064, '+']	['chr1', 1628102, '+']
ENST00000572242	1515	1597	0.3602	['chr1', 1628308, '+']	['chr1', 1628330, '+']
ENST00000572242	1730	1777	0.27035	['chr1', 1628363, '+']	['chr1', 1628490, '+']
ENST00000572242	1860	1910	0.37291	['chr1', 1628535, '+']	['chr1', 1628563, '+']
ENST00000572242	2091	2124	0.45582	['chr1', 1628590, '+']	['chr1', 1628619, '+']
ENST00000453521	132	214	0.3602	['chr1', 1629265, '+']	['chr1', 1629307, '+']
ENST00000453521	347	394	0.27035	['chr1', 1629440, '+']	['chr1', 1629462, '+']
ENST00000453521	477	527	0.37291	['chr1', 1630332, '+']	['chr1', 1630360, '+']
ENST00000453521	708	741	0.45582	['chr1', 1628535, '+']	['chr1', 1628563, '+']
ENST00000338660	363	385	0.2335	['chr1', 1628590, '+']	['chr1', 1628619, '+']
ENST00000338660	1666	1711	0.29529	['chr1', 1629265, '+']	['chr1', 1629307, '+']
ENST00000338660	1878	1926	0.30412	['chr1', 1629440, '+']	['chr1', 1629462, '+']
ENST00000338660	2034	2065	0.32367	['chr1', 1630332, '+']	['chr1', 1630360, '+']
ENST00000476993	610	632	0.2335	['chr1', 1629265, '+']	['chr1', 1629307, '+']
ENST00000476993	1913	1958	0.29529	['chr1', 1630332, '+']	['chr1', 1630360, '+']
ENST00000476993	2125	2173	0.30412	['chr1', 1630332, '+']	['chr1', 1630360, '+']
ENST00000476993	2281	2312	0.32367	['chr1', 2050507, '+']	['chr1', 2050529, '+']
ENST00000495558	745	767	0.2335	['chr1', 2050580, '+']	['chr1', 2050620, '+']
ENST00000308647	748	805	0.69517	['chr1', 2050647, '+']	['chr1', 2050669, '+']
ENST00000308647	981	1017	0.29835	['chr1', 2055441, '+']	['chr1', 2055482, '+']
ENST00000308647	1117	1136	0.23315	['chr1', 2144275, '+']	['chr1', 2144317, '+']
ENST00000308647	1163	1249	0.506	['chr1', 2150916, '+']	['chr1', 2150935, '+']
ENST00000308647	1288	1316	0.2719	['chr1', 2050507, '+']	['chr1', 2050529, '+']
ENST00000308647	1677	1724	0.32605	['chr1', 2050580, '+']	['chr1', 2050620, '+']
ENST00000308647	1869	1917	0.24805	['chr1', 2050647, '+']	['chr1', 2050669, '+']
ENST00000308647	2134	2168	0.31525	['chr1', 2055441, '+']	['chr1', 2055482, '+']
ENST00000472194	224	267	0.3188	['chr1', 2144275, '+']	['chr1', 2144317, '+']
ENST00000472194	270	306	0.28555	['chr1', 2144275, '+']	['chr1', 2144317, '+']
ENST00000472194	968	1025	0.69517	['chr1', 2150916, '+']	['chr1', 2150935, '+']
ENST00000472194	1201	1237	0.29835	['chr1', 2144275, '+']	['chr1', 2144317, '+']
ENST00000472194	1337	1356	0.23315	['chr1', 2150916, '+']	['chr1', 2150935, '+']
ENST00000472194	1383	1469	0.506	['chr1', 2144275, '+']	['chr1', 2144317, '+']
ENST00000472194	1508	1536	0.2719	['chr1', 2150794, '+']	['chr1', 2150813, '+']
ENST00000472194	1897	1944	0.32605	['chr1', 2144275, '+']	['chr1', 2144317, '+']
ENST00000472194	2089	2137	0.24805	['chr1', 2144275, '+']	['chr1', 2144317, '+']
ENST00000472194	2354	2388	0.31525	['chr1', 2144275, '+']	['chr1', 2144317, '+']
ENST00000378736	248	305	0.69517	['chr1', 2144275, '+']	['chr1', 2144317, '+']
ENST00000485748	348	398	0.26273	['chr1', 2144275, '+']	['chr1', 2144317, '+']
ENST00000485748	1646	1682	0.29835	['chr1', 2150916, '+']	['chr1', 2150935, '+']
ENST00000485748	1782	1801	0.23315	['chr1', 2144275, '+']	['chr1', 2144317, '+']
ENST00000485748	1828	1914	0.506	['chr1', 2150916, '+']	['chr1', 2150935, '+']
ENST00000485748	1953	1981	0.2719	['chr1', 2144275, '+']	['chr1', 2144317, '+']
ENST00000485748	2462	2509	0.32605	['chr1', 2150916, '+']	['chr1', 2150935, '+']
ENST00000485748	2654	2702	0.24805	['chr1', 2144275, '+']	['chr1', 2144317, '+']
ENST00000485748	2919	2953	0.31525	['chr1', 2144275, '+']	['chr1', 2144317, '+']
ENST00000474481	562	598	0.29835	['chr1', 2150916, '+']	['chr1', 2150935, '+']
ENST00000474481	969	988	0.23315	['chr1', 2150916, '+']	['chr1', 2150935, '+']
ENST00000474481	1015	1101	0.506	['chr1', 2150916, '+']	['chr1', 2150935, '+']
ENST00000474481	1140	1168	0.2719	['chr1', 2228751, '+']	['chr1', 2228775, '+']
ENST00000474481	2597	2644	0.32605	['chr1', 2229178, '+']	['chr1', 2229217, '+']
ENST00000474481	2789	2837	0.24805	['chr1', 2304041, '+']	['chr1', 2304065, '+']
ENST00000474481	3054	3088	0.31525	['chr1', 2304492, '+']	['chr1', 2304524, '+']
ENST00000378756	121	171	0.3084	['chr1', 2306931, '+']	['chr1', 2306997, '+']
ENST00000378756	209	285	0.48215	['chr1', 2307131, '+']	['chr1', 2307157, '+']
ENST00000378756	673	721	0.35765	['chr1', 2307606, '+']	['chr1', 2307626, '+']
ENST00000378756	1147	1173	0.2623	['chr1', 2307876, '+']	['chr1', 2307901, '+']
ENST00000378756	1641	1664	0.2652	['chr1', 2308051, '+']	['chr1', 2308086, '+']
ENST00000378756	1674	1763	0.3815	['chr1', 2308159, '+']	['chr1', 2308192, '+']
ENST00000378756	2015	2096	0.55445	['chr1', 2308440, '+']	['chr1', 2308500, '+']
ENST00000378755	97	147	0.3084	['chr1', 2309518, '+']	['chr1', 2309550, '+']
ENST00000378755	185	261	0.48215	['chr1', 2309954, '+']	['chr1', 2309973, '+']
ENST00000378755	793	841	0.35765	['chr1', 2310061, '+']	['chr1', 2310080, '+']
ENST00000378755	1267	1293	0.2623	['chr1', 2304041, '+']	['chr1', 2304065, '+']
ENST00000378755	1761	1784	0.2652	['chr1', 2402268, '+']	['chr1', 2402295, '+']
ENST00000378755	1794	1883	0.3815	['chr1', 2403671, '+']	['chr1', 2403695, '+']
ENST00000378755	2135	2216	0.55445	['chr1', 2403910, '+']	['chr1', 2403958, '+']
ENST00000339113	511	559	0.35765	['chr1', 2403959, '+']	['chr1', 2403988, '+']
ENST00000339113	985	1011	0.2623	['chr1', 2404006, '+']	['chr1', 2404054, '+']
ENST00000339113	1479	1502	0.2652	['chr1', 2404055, '+']	['chr1', 2404090, '+']
ENST00000339113	1512	1601	0.3815	['chr1', 2404482, '+']	['chr1', 2404516, '+']
ENST00000339113	1853	1934	0.55445	['chr1', 2404644, '+']	['chr1', 2404688, '+']
ENST00000536055	511	559	0.35765	['chr1', 2404797, '+']	['chr1', 2404823, '+']
ENST00000536055	985	1011	0.2623	['chr1', 2404832, '+']	['chr1', 2404868, '+']
ENST00000536055	1479	1502	0.2652	['chr1', 2404879, '+']	['chr1', 2404901, '+']
ENST00000536055	1512	1601	0.3815	['chr1', 2405095, '+']	['chr1', 2405114, '+']
ENST00000536055	1853	1934	0.55445	['chr1', 2405276, '+']	['chr1', 2405316, '+']
ENST00000429957	266	314	0.35765	['chr1', 2402268, '+']	['chr1', 2402295, '+']
ENST00000400830	512	535	0.2652	['chr1', 2402268, '+']	['chr1', 2402295, '+']
ENST00000400830	545	582	0.32811	['chr1', 2403671, '+']	['chr1', 2403695, '+']
ENST00000520777	231	266	0.2658	['chr1', 2403910, '+']	['chr1', 2403958, '+']
ENST00000520777	349	429	0.30592	['chr1', 2403959, '+']	['chr1', 2403988, '+']
ENST00000520777	528	593	0.26721	['chr1', 2404006, '+']	['chr1', 2404054, '+']
ENST00000520777	645	717	0.31535	['chr1', 2404055, '+']	['chr1', 2404090, '+']
ENST00000520777	736	791	0.28485	['chr1', 2404482, '+']	['chr1', 2404516, '+']
ENST00000520777	808	889	0.3639	['chr1', 2404644, '+']	['chr1', 2404688, '+']
ENST00000520777	1009	1075	0.274	['chr1', 2404797, '+']	['chr1', 2404823, '+']
ENST00000520777	1119	1156	0.27685	['chr1', 2404832, '+']	['chr1', 2404868, '+']
ENST00000520777	1193	1255	0.24944	['chr1', 2404879, '+']	['chr1', 2404901, '+']
ENST00000520777	1275	1333	0.3191	['chr1', 2405095, '+']	['chr1', 2405114, '+']
ENST00000520777	1340	1406	0.3076	['chr1', 2405276, '+']	['chr1', 2405316, '+']
ENST00000520777	1426	1447	0.232	['chr1', 2402268, '+']	['chr1', 2402295, '+']
ENST00000520777	1464	1505	0.366	['chr1', 2402268, '+']	['chr1', 2402295, '+']
ENST00000520777	1520	1542	0.24835	['chr1', 2403671, '+']	['chr1', 2403695, '+']
ENST00000520777	1608	1719	0.33205	['chr1', 2402270, '+']	['chr1', 2402295, '+']
ENST00000520777	1771	1790	0.23265	['chr1', 2402268, '+']	['chr1', 2402295, '+']
ENST00000520777	1825	1853	0.2483	['chr1', 2402268, '+']	['chr1', 2402295, '+']
ENST00000520777	1974	1997	0.24835	['chr1', 2587147, '+']	['chr1', 2587181, '+']
ENST00000520777	2034	2070	0.30879	['chr1', 2587255, '+']	['chr1', 2587743, '+']
ENST00000520777	2073	2111	0.2793	['chr1', 2587147, '+']	['chr1', 2587181, '+']
ENST00000520777	2255	2299	0.31645	['chr1', 2587255, '+']	['chr1', 2587743, '+']
ENST00000520777	2365	2389	0.25075	['chr1', 2589603, '+']	['chr1', 2589637, '+']
ENST00000520777	2421	2479	0.28185	['chr1', 2587147, '+']	['chr1', 2587181, '+']
ENST00000520777	2616	2691	0.30245	['chr1', 2587255, '+']	['chr1', 2587743, '+']
ENST00000520777	2762	2788	0.2717	['chr1', 2589603, '+']	['chr1', 2589629, '+']
ENST00000520777	2918	2950	0.38782	['chr1', 2590194, '+']	['chr1', 2590230, '+']
ENST00000520777	3046	3071	0.25165	['chr1', 2590483, '+']	['chr1', 2590521, '+']
ENST00000520777	3171	3192	0.2367	['chr1', 2590529, '+']	['chr1', 2590553, '+']
ENST00000520777	3215	3259	0.2762	['chr1', 2590714, '+']	['chr1', 2590735, '+']
ENST00000355826	225	260	0.2658	['chr1', 2590866, '+']	['chr1', 2590885, '+']
ENST00000355826	321	381	0.30592	['chr1', 2590906, '+']	['chr1', 2590938, '+']
ENST00000355826	480	545	0.26721	['chr1', 2591214, '+']	['chr1', 2591233, '+']
ENST00000355826	597	669	0.31535	['chr1', 2591305, '+']	['chr1', 2591333, '+']
ENST00000355826	688	743	0.28485	['chr1', 2587147, '+']	['chr1', 2587181, '+']
ENST00000355826	760	841	0.3639	['chr1', 2587255, '+']	['chr1', 2587743, '+']
ENST00000355826	961	1027	0.274	['chr1', 2589603, '+']	['chr1', 2589629, '+']
ENST00000355826	1071	1108	0.27685	['chr1', 2590194, '+']	['chr1', 2590230, '+']
ENST00000355826	1145	1218	0.28967	['chr1', 2590483, '+']	['chr1', 2590521, '+']
ENST00000355826	1239	1297	0.3191	['chr1', 2590529, '+']	['chr1', 2590553, '+']
ENST00000355826	1304	1370	0.3076	['chr1', 2590714, '+']	['chr1', 2590735, '+']
ENST00000355826	1390	1411	0.232	['chr1', 2590866, '+']	['chr1', 2590885, '+']
ENST00000355826	1428	1469	0.366	['chr1', 2590906, '+']	['chr1', 2590938, '+']
ENST00000355826	1484	1506	0.24835	['chr1', 2591214, '+']	['chr1', 2591233, '+']
ENST00000355826	1572	1683	0.33205	['chr1', 2591305, '+']	['chr1', 2591333, '+']
ENST00000355826	1735	1754	0.23265	['chr1', 2587147, '+']	['chr1', 2587181, '+']
ENST00000355826	1789	1817	0.2483	['chr1', 2587255, '+']	['chr1', 2587743, '+']
ENST00000355826	1938	1961	0.24835	['chr1', 2589603, '+']	['chr1', 2589629, '+']
ENST00000355826	1998	2034	0.30879	['chr1', 2590194, '+']	['chr1', 2590230, '+']
ENST00000355826	2037	2075	0.2793	['chr1', 2590483, '+']	['chr1', 2590521, '+']
ENST00000355826	2219	2263	0.31645	['chr1', 2590529, '+']	['chr1', 2590553, '+']
ENST00000355826	2329	2353	0.25075	['chr1', 2590714, '+']	['chr1', 2590735, '+']
ENST00000355826	2385	2443	0.28185	['chr1', 2590866, '+']	['chr1', 2590885, '+']
ENST00000355826	2580	2655	0.30245	['chr1', 2590906, '+']	['chr1', 2590938, '+']
ENST00000355826	2726	2752	0.2717	['chr1', 2591214, '+']	['chr1', 2591233, '+']
ENST00000355826	2882	2914	0.38782	['chr1', 2591305, '+']	['chr1', 2591333, '+']
ENST00000355826	3010	3035	0.25165	['chr1', 2587147, '+']	['chr1', 2587181, '+']
ENST00000355826	3135	3156	0.2367	['chr1', 2587255, '+']	['chr1', 2587743, '+']
ENST00000355826	3179	3223	0.2762	['chr1', 2589603, '+']	['chr1', 2589629, '+']
ENST00000518681	209	244	0.2658	['chr1', 2590194, '+']	['chr1', 2590230, '+']
ENST00000518681	327	407	0.30592	['chr1', 2590483, '+']	['chr1', 2590521, '+']
ENST00000518681	506	571	0.26721	['chr1', 2590529, '+']	['chr1', 2590553, '+']
ENST00000518681	623	695	0.31535	['chr1', 2590714, '+']	['chr1', 2590735, '+']
ENST00000518681	714	769	0.28485	['chr1', 2590866, '+']	['chr1', 2590885, '+']
ENST00000518681	786	867	0.3639	['chr1', 2590906, '+']	['chr1', 2590938, '+']
ENST00000518681	902	939	0.27685	['chr1', 2591214, '+']	['chr1', 2591233, '+']
ENST00000518681	976	1049	0.28967	['chr1', 2591305, '+']	['chr1', 2591333, '+']
ENST00000518681	1070	1128	0.3191	['chr1', 2587147, '+']	['chr1', 2587181, '+']
ENST00000518681	1135	1201	0.3076	['chr1', 2587255, '+']	['chr1', 2587743, '+']
ENST00000518681	1221	1242	0.232	['chr1', 2589603, '+']	['chr1', 2589629, '+']
ENST00000518681	1259	1300	0.366	['chr1', 2587147, '+']	['chr1', 2587181, '+']
ENST00000518681	1315	1337	0.24835	['chr1', 2587255, '+']	['chr1', 2587743, '+']
ENST00000518681	1403	1514	0.33205	['chr1', 2589603, '+']	['chr1', 2589629, '+']
ENST00000518681	1566	1585	0.23265	['chr1', 2590194, '+']	['chr1', 2590230, '+']
ENST00000518681	1620	1648	0.2483	['chr1', 2590483, '+']	['chr1', 2590521, '+']
ENST00000518681	1769	1792	0.24835	['chr1', 2590529, '+']	['chr1', 2590553, '+']
ENST00000518681	1829	1865	0.30879	['chr1', 2590714, '+']	['chr1', 2590735, '+']
ENST00000518681	1868	1906	0.2793	['chr1', 2590866, '+']	['chr1', 2590885, '+']
ENST00000518681	2050	2094	0.31645	['chr1', 2590906, '+']	['chr1', 2590938, '+']
ENST00000518681	2160	2184	0.25075	['chr1', 2591214, '+']	['chr1', 2591233, '+']
ENST00000518681	2216	2274	0.28185	['chr1', 2591305, '+']	['chr1', 2591333, '+']
ENST00000518681	2411	2486	0.30245	['chr1', 2587147, '+']	['chr1', 2587181, '+']
ENST00000518681	2557	2583	0.2717	['chr1', 2587255, '+']	['chr1', 2587743, '+']
ENST00000518681	2713	2745	0.38782	['chr1', 2589603, '+']	['chr1', 2589629, '+']
ENST00000518681	2841	2866	0.25165	['chr1', 2587147, '+']	['chr1', 2587181, '+']
ENST00000518681	2966	2987	0.2367	['chr1', 2587255, '+']	['chr1', 2587743, '+']
ENST00000518681	3010	3054	0.2762	['chr1', 2587147, '+']	['chr1', 2587181, '+']
ENST00000505820	203	238	0.2658	['chr1', 2587255, '+']	['chr1', 2587743, '+']
ENST00000505820	321	401	0.30592	['chr1', 2589603, '+']	['chr1', 2589629, '+']
ENST00000505820	500	565	0.26721	['chr1', 2590194, '+']	['chr1', 2590230, '+']
ENST00000505820	617	689	0.31535	['chr1', 2590483, '+']	['chr1', 2590521, '+']
ENST00000505820	708	763	0.28485	['chr1', 2590529, '+']	['chr1', 2590553, '+']
ENST00000505820	780	861	0.3639	['chr1', 2590714, '+']	['chr1', 2590735, '+']
ENST00000505820	981	1047	0.274	['chr1', 2590866, '+']	['chr1', 2590885, '+']
ENST00000505820	1091	1128	0.27685	['chr1', 2590906, '+']	['chr1', 2590938, '+']
ENST00000505820	1165	1238	0.28967	['chr1', 2591214, '+']	['chr1', 2591233, '+']
ENST00000505820	1259	1317	0.3191	['chr1', 2591305, '+']	['chr1', 2591333, '+']
ENST00000505820	1324	1390	0.3076	['chr1', 2589603, '+']	['chr1', 2589629, '+']
ENST00000505820	1410	1431	0.232	['chr1', 2590194, '+']	['chr1', 2590230, '+']
ENST00000505820	1448	1489	0.366	['chr1', 2590483, '+']	['chr1', 2590521, '+']
ENST00000505820	1504	1526	0.24835	['chr1', 2590529, '+']	['chr1', 2590553, '+']
ENST00000505820	1592	1703	0.33205	['chr1', 2590714, '+']	['chr1', 2590735, '+']
ENST00000505820	1755	1774	0.23265	['chr1', 2590866, '+']	['chr1', 2590885, '+']
ENST00000505820	1809	1837	0.2483	['chr1', 2590906, '+']	['chr1', 2590938, '+']
ENST00000505820	1958	1981	0.24835	['chr1', 2591214, '+']	['chr1', 2591233, '+']
ENST00000505820	2018	2054	0.30879	['chr1', 2591305, '+']	['chr1', 2591333, '+']
ENST00000505820	2057	2095	0.2793	['chr1', 3707560, '+']	['chr1', 3707592, '+']
ENST00000505820	2239	2283	0.31645	['chr1', 3707665, '+']	['chr1', 3707684, '+']
ENST00000505820	2349	2373	0.25075	['chr1', 3707705, '+']	['chr1', 3707754, '+']
ENST00000505820	2405	2463	0.28185	['chr1', 3722029, '+']	['chr1', 3722057, '+']
ENST00000505820	2600	2675	0.30245	['chr1', 3722144, '+']	['chr1', 3722173, '+']
ENST00000505820	2746	2772	0.2717	['chr1', 3727152, '+']	['chr1', 3727184, '+']
ENST00000505820	2902	2934	0.38782	['chr1', 3727651, '+']	['chr1', 3727676, '+']
ENST00000505820	3030	3055	0.25165	['chr1', 3729363, '+']	['chr1', 3729389, '+']
ENST00000505820	3155	3176	0.2367	['chr1', 3729401, '+']	['chr1', 3729422, '+']
ENST00000505820	3199	3243	0.2762	['chr1', 3729429, '+']	['chr1', 3730008, '+']
ENST00000479659	192	227	0.2658	['chr1', 3732856, '+']	['chr1', 3732904, '+']
ENST00000479659	288	348	0.30592	['chr1', 3733326, '+']	['chr1', 3733345, '+']
ENST00000479659	447	512	0.26721	['chr1', 3733349, '+']	['chr1', 3733386, '+']
ENST00000479659	564	636	0.31535	['chr1', 3733553, '+']	['chr1', 3733572, '+']
ENST00000479659	655	710	0.28485	['chr1', 3735104, '+']	['chr1', 3735133, '+']
ENST00000479659	727	808	0.3639	['chr1', 3735848, '+']	['chr1', 3735870, '+']
ENST00000479659	928	994	0.274	['chr1', 3735874, '+']	['chr1', 3735905, '+']
ENST00000479659	1038	1075	0.27685	['chr1', 3707560, '+']	['chr1', 3707592, '+']
ENST00000479659	1112	1185	0.28967	['chr1', 3707665, '+']	['chr1', 3707684, '+']
ENST00000479659	1206	1264	0.3191	['chr1', 3707705, '+']	['chr1', 3707754, '+']
ENST00000479659	2284	2333	0.3076	['chr1', 3722029, '+']	['chr1', 3722057, '+']
ENST00000479659	2353	2374	0.232	['chr1', 3722144, '+']	['chr1', 3722173, '+']
ENST00000479659	2391	2432	0.366	['chr1', 3727152, '+']	['chr1', 3727184, '+']
ENST00000479659	2447	2469	0.24835	['chr1', 3727651, '+']	['chr1', 3727676, '+']
ENST00000479659	2535	2646	0.33205	['chr1', 3729363, '+']	['chr1', 3729389, '+']
ENST00000479659	2698	2717	0.23265	['chr1', 3729401, '+']	['chr1', 3729422, '+']
ENST00000479659	2752	2780	0.2483	['chr1', 3729429, '+']	['chr1', 3732748, '+']
ENST00000479659	2901	2924	0.24835	['chr1', 3732856, '+']	['chr1', 3732904, '+']
ENST00000479659	2961	2997	0.30879	['chr1', 3733326, '+']	['chr1', 3733345, '+']
ENST00000479659	3000	3038	0.2793	['chr1', 3733349, '+']	['chr1', 3733386, '+']
ENST00000479659	3182	3226	0.31645	['chr1', 3733553, '+']	['chr1', 3733572, '+']
ENST00000479659	3292	3316	0.25075	['chr1', 3735104, '+']	['chr1', 3735133, '+']
ENST00000479659	3348	3406	0.28185	['chr1', 3735848, '+']	['chr1', 3735870, '+']
ENST00000479659	3543	3618	0.30245	['chr1', 3735874, '+']	['chr1', 3735905, '+']
ENST00000479659	3689	3715	0.2717	['chr1', 3707560, '+']	['chr1', 3707592, '+']
ENST00000479659	3845	3877	0.38782	['chr1', 3707665, '+']	['chr1', 3707684, '+']
ENST00000479659	3973	3998	0.25165	['chr1', 3707705, '+']	['chr1', 3707754, '+']
ENST00000479659	4098	4119	0.2367	['chr1', 3722029, '+']	['chr1', 3722057, '+']
ENST00000479659	4142	4186	0.2762	['chr1', 3722144, '+']	['chr1', 3722173, '+']
ENST00000489635	150	185	0.2658	['chr1', 3727152, '+']	['chr1', 3727184, '+']
ENST00000489635	268	419	0.31535	['chr1', 3727651, '+']	['chr1', 3727676, '+']
ENST00000489635	438	493	0.28485	['chr1', 3729363, '+']	['chr1', 3729389, '+']
ENST00000489635	510	591	0.3639	['chr1', 3729401, '+']	['chr1', 3729422, '+']
ENST00000489635	711	777	0.274	['chr1', 3729429, '+']	['chr1', 3730008, '+']
ENST00000489635	821	858	0.27685	['chr1', 3732856, '+']	['chr1', 3732904, '+']
ENST00000489635	895	968	0.28967	['chr1', 3707560, '+']	['chr1', 3707592, '+']
ENST00000489635	989	1047	0.3191	['chr1', 3707665, '+']	['chr1', 3707684, '+']
ENST00000489635	1054	1120	0.3076	['chr1', 3707705, '+']	['chr1', 3707754, '+']
ENST00000489635	1140	1161	0.232	['chr1', 3722029, '+']	['chr1', 3722057, '+']
ENST00000489635	1178	1219	0.366	['chr1', 3722144, '+']	['chr1', 3722173, '+']
ENST00000489635	1234	1256	0.24835	['chr1', 3727152, '+']	['chr1', 3727184, '+']
ENST00000489635	1322	1433	0.33205	['chr1', 3727651, '+']	['chr1', 3727676, '+']
ENST00000489635	1485	1504	0.23265	['chr1', 3729363, '+']	['chr1', 3729389, '+']
ENST00000489635	1539	1567	0.2483	['chr1', 3729401, '+']	['chr1', 3729422, '+']
ENST00000489635	1688	1711	0.24835	['chr1', 3729429, '+']	['chr1', 3731471, '+']
ENST00000489635	1748	1784	0.30879	['chr1', 3732856, '+']	['chr1', 3732904, '+']
ENST00000489635	1787	1825	0.2793	['chr1', 3733326, '+']	['chr1', 3733345, '+']
ENST00000489635	1969	2013	0.31645	['chr1', 3733349, '+']	['chr1', 3733386, '+']
ENST00000489635	2079	2103	0.25075	['chr1', 3733553, '+']	['chr1', 3733572, '+']
ENST00000489635	2135	2193	0.28185	['chr1', 3735104, '+']	['chr1', 3735133, '+']
ENST00000489635	2330	2405	0.30245	['chr1', 3735848, '+']	['chr1', 3735870, '+']
ENST00000489635	2476	2502	0.2717	['chr1', 3735874, '+']	['chr1', 3735905, '+']
ENST00000489635	2632	2664	0.38782	['chr1', 3707560, '+']	['chr1', 3707592, '+']
ENST00000489635	2760	2785	0.25165	['chr1', 3707665, '+']	['chr1', 3707684, '+']
ENST00000489635	2885	2906	0.2367	['chr1', 3707705, '+']	['chr1', 3707754, '+']
ENST00000489635	2929	2973	0.2762	['chr1', 3722029, '+']	['chr1', 3722057, '+']
ENST00000511502	132	167	0.2658	['chr1', 3722144, '+']	['chr1', 3722173, '+']
ENST00000511502	250	330	0.30592	['chr1', 3727152, '+']	['chr1', 3727184, '+']
ENST00000511502	429	494	0.26721	['chr1', 3727651, '+']	['chr1', 3727676, '+']
ENST00000511502	546	618	0.31535	['chr1', 3729363, '+']	['chr1', 3729389, '+']
ENST00000511502	637	692	0.28485	['chr1', 3729401, '+']	['chr1', 3729422, '+']
ENST00000511502	709	790	0.3639	['chr1', 3729429, '+']	['chr1', 3730927, '+']
ENST00000511502	910	976	0.274	['chr1', 3732856, '+']	['chr1', 3732904, '+']
ENST00000511502	1020	1057	0.27685	['chr1', 3733326, '+']	['chr1', 3733345, '+']
ENST00000511502	1094	1167	0.28967	['chr1', 3733349, '+']	['chr1', 3733386, '+']
ENST00000511502	1188	1246	0.3191	['chr1', 3733553, '+']	['chr1', 3733572, '+']
ENST00000511502	1253	1319	0.3076	['chr1', 3735104, '+']	['chr1', 3735133, '+']
ENST00000511502	1339	1360	0.232	['chr1', 3735848, '+']	['chr1', 3735870, '+']
ENST00000511502	1377	1418	0.366	['chr1', 3735874, '+']	['chr1', 3735905, '+']
ENST00000511502	1433	1455	0.24835	['chr1', 3707560, '+']	['chr1', 3707592, '+']
ENST00000511502	1521	1632	0.33205	['chr1', 3707665, '+']	['chr1', 3707684, '+']
ENST00000511502	1684	1703	0.23265	['chr1', 3707705, '+']	['chr1', 3707754, '+']
ENST00000511502	1738	1766	0.2483	['chr1', 3722029, '+']	['chr1', 3722057, '+']
ENST00000511502	1887	1910	0.24835	['chr1', 3722144, '+']	['chr1', 3722173, '+']
ENST00000511502	1947	1983	0.30879	['chr1', 3727152, '+']	['chr1', 3727184, '+']
ENST00000511502	1986	2024	0.2793	['chr1', 3727651, '+']	['chr1', 3727676, '+']
ENST00000511502	2261	2305	0.31645	['chr1', 3729363, '+']	['chr1', 3729389, '+']
ENST00000511502	2371	2395	0.25075	['chr1', 3729401, '+']	['chr1', 3729422, '+']
ENST00000511502	2427	2485	0.28185	['chr1', 3729429, '+']	['chr1', 3730927, '+']
ENST00000511502	2622	2697	0.30245	['chr1', 3732856, '+']	['chr1', 3732904, '+']
ENST00000511502	2768	2794	0.2717	['chr1', 3707560, '+']	['chr1', 3707592, '+']
ENST00000511502	2924	2956	0.38782	['chr1', 3707665, '+']	['chr1', 3707684, '+']
ENST00000511502	3052	3077	0.25165	['chr1', 3707705, '+']	['chr1', 3707754, '+']
ENST00000511502	3177	3198	0.2367	['chr1', 3722029, '+']	['chr1', 3722057, '+']
ENST00000511502	3221	3265	0.2762	['chr1', 3722144, '+']	['chr1', 3722173, '+']
ENST00000514363	116	151	0.2658	['chr1', 3727152, '+']	['chr1', 3727184, '+']
ENST00000514363	212	343	0.31535	['chr1', 3727651, '+']	['chr1', 3727676, '+']
ENST00000514363	362	417	0.28485	['chr1', 3729363, '+']	['chr1', 3729389, '+']
ENST00000514363	434	515	0.3639	['chr1', 3729401, '+']	['chr1', 3729422, '+']
ENST00000487053	234	269	0.2658	['chr1', 3729429, '+']	['chr1', 3731471, '+']
ENST00000487053	352	432	0.30592	['chr1', 3732856, '+']	['chr1', 3732904, '+']
ENST00000487053	531	596	0.26721	['chr1', 3707560, '+']	['chr1', 3707592, '+']
ENST00000487053	648	720	0.31535	['chr1', 3707665, '+']	['chr1', 3707684, '+']
ENST00000487053	739	794	0.28485	['chr1', 3707705, '+']	['chr1', 3707754, '+']
ENST00000487053	811	892	0.3639	['chr1', 3722029, '+']	['chr1', 3722057, '+']
ENST00000487053	1012	1078	0.274	['chr1', 3722144, '+']	['chr1', 3722173, '+']
ENST00000487053	1122	1159	0.27685	['chr1', 3727152, '+']	['chr1', 3727184, '+']
ENST00000487053	1196	1269	0.28967	['chr1', 3727651, '+']	['chr1', 3727676, '+']
ENST00000487053	1290	1348	0.3191	['chr1', 3729363, '+']	['chr1', 3729389, '+']
ENST00000487053	1355	1421	0.3076	['chr1', 3729401, '+']	['chr1', 3729422, '+']
ENST00000487053	1441	1462	0.232	['chr1', 3729429, '+']	['chr1', 3730927, '+']
ENST00000487053	1479	1520	0.366	['chr1', 3732856, '+']	['chr1', 3732904, '+']
ENST00000487053	1535	1557	0.24835	['chr1', 3707560, '+']	['chr1', 3707592, '+']
ENST00000487053	1623	1734	0.33205	['chr1', 3707665, '+']	['chr1', 3707684, '+']
ENST00000487053	1786	1805	0.23265	['chr1', 3707705, '+']	['chr1', 3707754, '+']
ENST00000487053	1840	1868	0.2483	['chr1', 3722029, '+']	['chr1', 3722057, '+']
ENST00000487053	1989	2012	0.24835	['chr1', 3722144, '+']	['chr1', 3722173, '+']
ENST00000487053	2049	2085	0.30879	['chr1', 3727152, '+']	['chr1', 3727184, '+']
ENST00000487053	2088	2126	0.2793	['chr1', 3727651, '+']	['chr1', 3727676, '+']
ENST00000487053	2270	2314	0.31645	['chr1', 3729363, '+']	['chr1', 3729389, '+']
ENST00000487053	2380	2404	0.25075	['chr1', 3729401, '+']	['chr1', 3729422, '+']
ENST00000487053	2436	2494	0.28185	['chr1', 3729429, '+']	['chr1', 3730008, '+']
ENST00000487053	2631	2706	0.30245	['chr1', 3732856, '+']	['chr1', 3732904, '+']
ENST00000487053	2778	2803	0.24255	['chr1', 3707560, '+']	['chr1', 3707592, '+']
ENST00000487053	2850	2882	0.38782	['chr1', 3707665, '+']	['chr1', 3707684, '+']
ENST00000487053	2978	3003	0.25165	['chr1', 3707705, '+']	['chr1', 3707754, '+']
ENST00000487053	3103	3124	0.2367	['chr1', 3722029, '+']	['chr1', 3722057, '+']
ENST00000487053	3147	3191	0.2762	['chr1', 3722144, '+']	['chr1', 3722173, '+']
ENST00000502470	226	261	0.2658	['chr1', 3727152, '+']	['chr1', 3727184, '+']
ENST00000502470	322	382	0.30592	['chr1', 3727651, '+']	['chr1', 3727676, '+']
ENST00000502470	481	546	0.26721	['chr1', 3729363, '+']	['chr1', 3729389, '+']
ENST00000502470	578	650	0.31535	['chr1', 3729401, '+']	['chr1', 3729422, '+']
ENST00000502470	669	724	0.28485	['chr1', 3729429, '+']	['chr1', 3730008, '+']
ENST00000378712	208	243	0.2658	['chr1', 3732856, '+']	['chr1', 3732904, '+']
ENST00000378712	304	364	0.30592	['chr1', 3733326, '+']	['chr1', 3733345, '+']
ENST00000378712	463	528	0.26721	['chr1', 3733349, '+']	['chr1', 3733386, '+']
ENST00000378712	580	652	0.31535	['chr1', 3733553, '+']	['chr1', 3733572, '+']
ENST00000378712	671	726	0.28485	['chr1', 3735104, '+']	['chr1', 3735133, '+']
ENST00000378712	743	824	0.3639	['chr1', 3735848, '+']	['chr1', 3735870, '+']
ENST00000378712	859	896	0.27685	['chr1', 3735874, '+']	['chr1', 3735905, '+']
ENST00000378712	933	1006	0.28967	['chr1', 3707560, '+']	['chr1', 3707592, '+']
ENST00000378712	1027	1085	0.3191	['chr1', 3707665, '+']	['chr1', 3707684, '+']
ENST00000378712	1092	1158	0.3076	['chr1', 3707705, '+']	['chr1', 3707754, '+']
ENST00000378712	1178	1199	0.232	['chr1', 3722029, '+']	['chr1', 3722057, '+']
ENST00000378712	1216	1257	0.366	['chr1', 3722144, '+']	['chr1', 3722173, '+']
ENST00000378712	1272	1294	0.24835	['chr1', 3727152, '+']	['chr1', 3727184, '+']
ENST00000378712	1360	1471	0.33205	['chr1', 3727651, '+']	['chr1', 3727676, '+']
ENST00000378712	1523	1542	0.23265	['chr1', 3729363, '+']	['chr1', 3729389, '+']
ENST00000378712	1577	1605	0.2483	['chr1', 3729401, '+']	['chr1', 3729422, '+']
ENST00000378712	1726	1749	0.24835	['chr1', 3729429, '+']	['chr1', 3730008, '+']
ENST00000378712	1786	1822	0.30879	['chr1', 3732856, '+']	['chr1', 3732904, '+']
ENST00000378712	1825	1863	0.2793	['chr1', 3727651, '+']	['chr1', 3727676, '+']
ENST00000378712	2007	2051	0.31645	['chr1', 3729363, '+']	['chr1', 3729389, '+']
ENST00000378712	2117	2141	0.25075	['chr1', 3729401, '+']	['chr1', 3729422, '+']
ENST00000378712	2173	2231	0.28185	['chr1', 3729429, '+']	['chr1', 3730927, '+']
ENST00000378712	2368	2443	0.30245	['chr1', 3732856, '+']	['chr1', 3732904, '+']
ENST00000378712	2616	2641	0.25165	['chr1', 6588069, '+']	['chr1', 6588098, '+']
ENST00000378712	2741	2762	0.2367	['chr1', 6588101, '+']	['chr1', 6588143, '+']
ENST00000378712	2785	2829	0.2762	['chr1', 6588337, '+']	['chr1', 6588357, '+']
ENST00000510793	246	281	0.2658	['chr1', 6589167, '+']	['chr1', 6589189, '+']
ENST00000510793	342	402	0.30592	['chr1', 6589195, '+']	['chr1', 6589214, '+']
ENST00000510793	501	566	0.26721	['chr1', 6613851, '+']	['chr1', 6613870, '+']
ENST00000510793	618	690	0.31535	['chr1', 6613896, '+']	['chr1', 6613915, '+']
ENST00000510793	709	764	0.28485	['chr1', 6613959, '+']	['chr1', 6613982, '+']
ENST00000510793	781	862	0.3639	['chr1', 6614017, '+']	['chr1', 6614036, '+']
ENST00000504599	210	245	0.2658	['chr1', 6614062, '+']	['chr1', 6614103, '+']
ENST00000504599	328	408	0.30592	['chr1', 6619912, '+']	['chr1', 6619963, '+']
ENST00000504599	507	572	0.26721	['chr1', 6620071, '+']	['chr1', 6620102, '+']
ENST00000504599	624	696	0.31535	['chr1', 6620115, '+']	['chr1', 6620151, '+']
ENST00000504599	715	770	0.28485	['chr1', 6620259, '+']	['chr1', 6620291, '+']
ENST00000504599	787	868	0.3639	['chr1', 6620300, '+']	['chr1', 6620322, '+']
ENST00000504599	988	1054	0.274	['chr1', 6621520, '+']	['chr1', 6621597, '+']
ENST00000504599	1098	1135	0.27685	['chr1', 6621606, '+']	['chr1', 6621654, '+']
ENST00000504599	1172	1245	0.28967	['chr1', 6621698, '+']	['chr1', 6621717, '+']
ENST00000504599	1266	1324	0.3191	['chr1', 6621935, '+']	['chr1', 6621964, '+']
ENST00000504599	1331	1397	0.3076	['chr1', 6622290, '+']	['chr1', 6622322, '+']
ENST00000504599	1417	1438	0.232	['chr1', 6622407, '+']	['chr1', 6622426, '+']
ENST00000504599	1455	1496	0.366	['chr1', 6622427, '+']	['chr1', 6622451, '+']
ENST00000504599	1511	1533	0.24835	['chr1', 6622702, '+']	['chr1', 6622731, '+']
ENST00000504599	1599	1710	0.33205	['chr1', 6622775, '+']	['chr1', 6622794, '+']
ENST00000504599	1762	1781	0.23265	['chr1', 6623012, '+']	['chr1', 6623035, '+']
ENST00000504599	1816	1844	0.2483	['chr1', 6623037, '+']	['chr1', 6623091, '+']
ENST00000504599	1965	1988	0.24835	['chr1', 6623159, '+']	['chr1', 6623188, '+']
ENST00000504599	2025	2061	0.30879	['chr1', 6623284, '+']	['chr1', 6623303, '+']
ENST00000504599	2064	2102	0.2793	['chr1', 6623573, '+']	['chr1', 6623604, '+']
ENST00000504599	2246	2290	0.31645	['chr1', 6623763, '+']	['chr1', 6623801, '+']
ENST00000504599	2356	2380	0.25075	['chr1', 6623804, '+']	['chr1', 6623823, '+']
ENST00000504599	2412	2470	0.28185	['chr1', 6613851, '+']	['chr1', 6613870, '+']
ENST00000504599	2607	2682	0.30245	['chr1', 6613896, '+']	['chr1', 6613915, '+']
ENST00000504599	2753	2779	0.2717	['chr1', 6613959, '+']	['chr1', 6613982, '+']
ENST00000504599	2909	2941	0.38782	['chr1', 6614017, '+']	['chr1', 6614036, '+']
ENST00000504599	3037	3062	0.25165	['chr1', 6614062, '+']	['chr1', 6614103, '+']
ENST00000504599	3162	3183	0.2367	['chr1', 6622290, '+']	['chr1', 6622322, '+']
ENST00000504599	3206	3250	0.2762	['chr1', 6622407, '+']	['chr1', 6622426, '+']
ENST00000507229	209	244	0.2658	['chr1', 6622427, '+']	['chr1', 6622451, '+']
ENST00000507229	327	407	0.30592	['chr1', 6628511, '+']	['chr1', 6628539, '+']
ENST00000507229	506	571	0.26721	['chr1', 6628560, '+']	['chr1', 6628597, '+']
ENST00000507229	623	695	0.31535	['chr1', 6630347, '+']	['chr1', 6632852, '+']
ENST00000507229	714	769	0.28485	['chr1', 6632938, '+']	['chr1', 6632974, '+']
ENST00000507229	786	867	0.3639	['chr1', 6633069, '+']	['chr1', 6633088, '+']
ENST00000507229	987	1053	0.274	['chr1', 6633090, '+']	['chr1', 6633127, '+']
ENST00000507229	1097	1134	0.27685	['chr1', 6633275, '+']	['chr1', 6633309, '+']
ENST00000507229	1171	1288	0.3076	['chr1', 6633448, '+']	['chr1', 6633468, '+']
ENST00000507229	1308	1329	0.232	['chr1', 6633492, '+']	['chr1', 6633511, '+']
ENST00000507229	1346	1387	0.366	['chr1', 6628511, '+']	['chr1', 6628539, '+']
ENST00000507229	1402	1424	0.24835	['chr1', 6628560, '+']	['chr1', 6628597, '+']
ENST00000507229	1490	1601	0.33205	['chr1', 6630347, '+']	['chr1', 6632852, '+']
ENST00000507229	1653	1672	0.23265	['chr1', 6632938, '+']	['chr1', 6632974, '+']
ENST00000507229	1707	1735	0.2483	['chr1', 6633069, '+']	['chr1', 6633088, '+']
ENST00000507229	1856	1879	0.24835	['chr1', 6633090, '+']	['chr1', 6633127, '+']
ENST00000507229	1916	1952	0.30879	['chr1', 6633275, '+']	['chr1', 6633309, '+']
ENST00000507229	1955	1993	0.2793	['chr1', 6630347, '+']	['chr1', 6632852, '+']
ENST00000507229	2137	2181	0.31645	['chr1', 6632938, '+']	['chr1', 6632974, '+']
ENST00000507229	2336	2360	0.25075	['chr1', 6633069, '+']	['chr1', 6633088, '+']
ENST00000507229	2392	2450	0.28185	['chr1', 6633090, '+']	['chr1', 6633127, '+']
ENST00000503789	109	169	0.30592	['chr1', 6628511, '+']	['chr1', 6628539, '+']
ENST00000503789	268	333	0.26721	['chr1', 6628560, '+']	['chr1', 6628597, '+']
ENST00000503789	385	457	0.31535	['chr1', 6630347, '+']	['chr1', 6632852, '+']
ENST00000503789	476	531	0.28485	['chr1', 6632938, '+']	['chr1', 6632974, '+']
ENST00000378708	157	217	0.30592	['chr1', 6633069, '+']	['chr1', 6633088, '+']
ENST00000378708	316	381	0.26721	['chr1', 6628511, '+']	['chr1', 6628539, '+']
ENST00000378708	433	505	0.31535	['chr1', 6628560, '+']	['chr1', 6628597, '+']
ENST00000378708	524	579	0.28485	['chr1', 6630347, '+']	['chr1', 6632492, '+']
ENST00000378708	596	677	0.3639	['chr1', 6632788, '+']	['chr1', 6632852, '+']
ENST00000378708	797	863	0.274	['chr1', 6632938, '+']	['chr1', 6632974, '+']
ENST00000378708	907	944	0.27685	['chr1', 6628511, '+']	['chr1', 6628539, '+']
ENST00000378708	981	1098	0.3076	['chr1', 6628560, '+']	['chr1', 6628597, '+']
ENST00000378708	1118	1139	0.232	['chr1', 6871799, '+']	['chr1', 6871835, '+']
ENST00000378708	1156	1197	0.366	['chr1', 6871873, '+']	['chr1', 6871892, '+']
ENST00000378708	1212	1234	0.24835	['chr1', 6871895, '+']	['chr1', 6871924, '+']
ENST00000378708	1300	1411	0.33205	['chr1', 6871799, '+']	['chr1', 6871835, '+']
ENST00000378708	1463	1482	0.23265	['chr1', 6887688, '+']	['chr1', 6887708, '+']
ENST00000378708	1517	1545	0.2483	['chr1', 6887734, '+']	['chr1', 6887768, '+']
ENST00000378708	1666	1689	0.24835	['chr1', 6887875, '+']	['chr1', 6887900, '+']
ENST00000378708	1726	1762	0.30879	['chr1', 6887903, '+']	['chr1', 6887932, '+']
ENST00000378708	1765	1803	0.2793	['chr1', 6887982, '+']	['chr1', 6888009, '+']
ENST00000378708	1947	1991	0.31645	['chr1', 6888021, '+']	['chr1', 6888095, '+']
ENST00000378708	2057	2081	0.25075	['chr1', 6888138, '+']	['chr1', 6888180, '+']
ENST00000378708	2113	2171	0.28185	['chr1', 6871799, '+']	['chr1', 6871835, '+']
ENST00000378708	2308	2383	0.30245	['chr1', 6871873, '+']	['chr1', 6871892, '+']
ENST00000378708	2454	2480	0.2717	['chr1', 6871895, '+']	['chr1', 6871924, '+']
ENST00000378708	2610	2642	0.38782	['chr1', 6887688, '+']	['chr1', 6887708, '+']
ENST00000378708	2738	2763	0.25165	['chr1', 6887734, '+']	['chr1', 6887768, '+']
ENST00000378708	2863	2884	0.2367	['chr1', 6871799, '+']	['chr1', 6871835, '+']
ENST00000378708	2907	2951	0.2762	['chr1', 6871873, '+']	['chr1', 6871892, '+']
ENST00000506488	140	200	0.30592	['chr1', 6871895, '+']	['chr1', 6871924, '+']
ENST00000506488	299	364	0.26721	['chr1', 6871799, '+']	['chr1', 6871835, '+']
ENST00000506488	416	488	0.31535	['chr1', 6887688, '+']	['chr1', 6887708, '+']
ENST00000506488	507	562	0.28485	['chr1', 6887734, '+']	['chr1', 6887766, '+']
ENST00000506488	579	660	0.3639	['chr1', 6871799, '+']	['chr1', 6871824, '+']
ENST00000506488	780	846	0.274	['chr1', 6825113, '+']	['chr1', 6825132, '+']
ENST00000506488	890	927	0.27685	['chr1', 6887688, '+']	['chr1', 6887708, '+']
ENST00000506488	964	1081	0.3076	['chr1', 6887734, '+']	['chr1', 6887768, '+']
ENST00000506488	1101	1122	0.232	['chr1', 6887875, '+']	['chr1', 6887900, '+']
ENST00000506488	1139	1180	0.366	['chr1', 6887903, '+']	['chr1', 6887932, '+']
ENST00000506488	1195	1217	0.24835	['chr1', 6887982, '+']	['chr1', 6888009, '+']
ENST00000506488	1359	1468	0.33205	['chr1', 6888021, '+']	['chr1', 6888095, '+']
ENST00000506488	1520	1539	0.23265	['chr1', 6888138, '+']	['chr1', 6888167, '+']
ENST00000506488	1574	1602	0.2483	['chr1', 6853181, '+']	['chr1', 6871773, '+']
ENST00000506488	1723	1746	0.24835	['chr1', 6871799, '+']	['chr1', 6871835, '+']
ENST00000506488	1783	1819	0.30879	['chr1', 6887688, '+']	['chr1', 6887708, '+']
ENST00000506488	1822	1860	0.2793	['chr1', 6887734, '+']	['chr1', 6887768, '+']
ENST00000506488	2004	2048	0.31645	['chr1', 6887875, '+']	['chr1', 6887900, '+']
ENST00000506488	2114	2138	0.25075	['chr1', 6887903, '+']	['chr1', 6887932, '+']
ENST00000506488	2170	2228	0.28185	['chr1', 6887982, '+']	['chr1', 6888009, '+']
ENST00000506488	2365	2440	0.30245	['chr1', 6888021, '+']	['chr1', 6888095, '+']
ENST00000506488	2511	2537	0.2717	['chr1', 6888138, '+']	['chr1', 6888172, '+']
ENST00000506488	2667	2699	0.38782	['chr1', 6853181, '+']	['chr1', 6871773, '+']
ENST00000506488	2795	2820	0.25165	['chr1', 6871799, '+']	['chr1', 6871835, '+']
ENST00000506488	2920	2941	0.2367	['chr1', 6887688, '+']	['chr1', 6887708, '+']
ENST00000508455	10	75	0.26721	['chr1', 6887734, '+']	['chr1', 6887768, '+']
ENST00000508455	127	199	0.31535	['chr1', 6887875, '+']	['chr1', 6887900, '+']
ENST00000508455	218	273	0.28485	['chr1', 6887903, '+']	['chr1', 6887932, '+']
ENST00000514234	1	52	0.31535	['chr1', 6887982, '+']	['chr1', 6888009, '+']
ENST00000514234	71	126	0.28485	['chr1', 6888021, '+']	['chr1', 6888095, '+']
ENST00000514234	143	224	0.3639	['chr1', 6853181, '+']	['chr1', 6871773, '+']
ENST00000514234	344	410	0.274	['chr1', 6871799, '+']	['chr1', 6871835, '+']
ENST00000514234	454	491	0.27685	['chr1', 6871873, '+']	['chr1', 6871892, '+']
ENST00000514234	528	601	0.28967	['chr1', 6871895, '+']	['chr1', 6871924, '+']
ENST00000514234	622	680	0.3191	['chr1', 7773503, '+']	['chr1', 7777213, '+']
ENST00000514234	706	747	0.366	['chr1', 7777233, '+']	['chr1', 7777269, '+']
ENST00000514234	762	784	0.24835	['chr1', 7777279, '+']	['chr1', 7777310, '+']
ENST00000514234	850	961	0.33205	['chr1', 7779634, '+']	['chr1', 7779688, '+']
ENST00000514234	1013	1032	0.23265	['chr1', 7779931, '+']	['chr1', 7779998, '+']
ENST00000514234	1067	1095	0.2483	['chr1', 7780061, '+']	['chr1', 7780132, '+']
ENST00000514234	1216	1239	0.24835	['chr1', 7780288, '+']	['chr1', 7780322, '+']
ENST00000514234	1276	1312	0.30879	['chr1', 7780339, '+']	['chr1', 7780389, '+']
ENST00000514234	1315	1353	0.2793	['chr1', 7780895, '+']	['chr1', 7780935, '+']
ENST00000514234	1497	1541	0.31645	['chr1', 7780954, '+']	['chr1', 7780973, '+']
ENST00000514234	1607	1631	0.25075	['chr1', 9589035, '+']	['chr1', 9595915, '+']
ENST00000514234	1663	1721	0.28185	['chr1', 9595931, '+']	['chr1', 9595966, '+']
ENST00000514234	1858	1933	0.30245	['chr1', 9595974, '+']	['chr1', 9596874, '+']
ENST00000514234	2004	2030	0.2717	['chr1', 9601174, '+']	['chr1', 9601196, '+']
ENST00000514234	2160	2192	0.38782	['chr1', 9602097, '+']	['chr1', 9602119, '+']
ENST00000514234	2288	2313	0.25165	['chr1', 9602126, '+']	['chr1', 9602147, '+']
ENST00000514234	2413	2434	0.2367	['chr1', 9602299, '+']	['chr1', 9602336, '+']
ENST00000514234	2457	2501	0.2762	['chr1', 9603107, '+']	['chr1', 9603147, '+']
ENST00000467597	47	131	0.3639	['chr1', 9603179, '+']	['chr1', 9603199, '+']
ENST00000467597	277	343	0.274	['chr1', 9603207, '+']	['chr1', 9603229, '+']
ENST00000467597	387	424	0.27685	['chr1', 9603414, '+']	['chr1', 9603435, '+']
ENST00000467597	461	534	0.28967	['chr1', 9603449, '+']	['chr1', 9603478, '+']
ENST00000467597	555	613	0.3191	['chr1', 9603514, '+']	['chr1', 9603551, '+']
ENST00000508148	3	63	0.2601	['chr1', 9603675, '+']	['chr1', 9603696, '+']
ENST00000508148	107	144	0.27685	['chr1', 9603867, '+']	['chr1', 9603890, '+']
ENST00000508148	181	243	0.24944	['chr1', 9604398, '+']	['chr1', 9604452, '+']
ENST00000508148	392	450	0.3191	['chr1', 9604782, '+']	['chr1', 9604830, '+']
ENST00000486072	12	70	0.3191	['chr1', 9604879, '+']	['chr1', 9604920, '+']
ENST00000486072	377	426	0.3076	['chr1', 9589035, '+']	['chr1', 9595915, '+']
ENST00000486072	446	467	0.232	['chr1', 9595931, '+']	['chr1', 9595966, '+']
ENST00000486072	484	525	0.366	['chr1', 9595974, '+']	['chr1', 9596874, '+']
ENST00000505370	1	27	0.32153	['chr1', 9601174, '+']	['chr1', 9601196, '+']
ENST00000505370	42	64	0.24835	['chr1', 9602097, '+']	['chr1', 9602119, '+']
ENST00000505370	130	241	0.33205	['chr1', 9602126, '+']	['chr1', 9602147, '+']
ENST00000505370	293	312	0.23265	['chr1', 9602259, '+']	['chr1', 9607562, '+']
ENST00000505370	347	375	0.2483	['chr1', 9607574, '+']	['chr1', 9607641, '+']
ENST00000505370	724	747	0.24835	['chr1', 9607659, '+']	['chr1', 9607729, '+']
ENST00000473511	286	309	0.24835	['chr1', 9607747, '+']	['chr1', 9607789, '+']
ENST00000473511	346	382	0.30879	['chr1', 9610608, '+']	['chr1', 9610646, '+']
ENST00000473511	385	423	0.2793	['chr1', 9610705, '+']	['chr1', 9610733, '+']
ENST00000473511	660	704	0.31645	['chr1', 9610744, '+']	['chr1', 9610782, '+']
ENST00000473511	770	794	0.25075	['chr1', 9611759, '+']	['chr1', 9611785, '+']
ENST00000473511	826	884	0.28185	['chr1', 9611879, '+']	['chr1', 9613010, '+']
ENST00000473511	1021	1096	0.30245	['chr1', 9613016, '+']	['chr1', 9613101, '+']
ENST00000473511	1167	1193	0.2717	['chr1', 9613131, '+']	['chr1', 9613151, '+']
ENST00000464570	224	247	0.24835	['chr1', 9613722, '+']	['chr1', 9613749, '+']
ENST00000464570	284	320	0.30879	['chr1', 9614044, '+']	['chr1', 9614072, '+']
ENST00000464570	323	361	0.2793	['chr1', 9614183, '+']	['chr1', 9614203, '+']
ENST00000464570	505	549	0.31645	['chr1', 9601174, '+']	['chr1', 9601196, '+']
ENST00000464570	615	639	0.25075	['chr1', 9602097, '+']	['chr1', 9602119, '+']
ENST00000464570	671	729	0.28185	['chr1', 9602126, '+']	['chr1', 9602147, '+']
ENST00000464570	866	946	0.30245	['chr1', 9602259, '+']	['chr1', 9607562, '+']
ENST00000483015	19	43	0.25075	['chr1', 9607574, '+']	['chr1', 9607641, '+']
ENST00000483015	75	133	0.28185	['chr1', 9607659, '+']	['chr1', 9607729, '+']
ENST00000483015	369	444	0.30245	['chr1', 9607747, '+']	['chr1', 9607789, '+']
ENST00000483015	515	541	0.2717	['chr1', 9610608, '+']	['chr1', 9610646, '+']
ENST00000483015	671	703	0.38782	['chr1', 9610705, '+']	['chr1', 9610733, '+']
ENST00000483015	799	824	0.25165	['chr1', 9610744, '+']	['chr1', 9610782, '+']
ENST00000483015	924	945	0.2367	['chr1', 9611759, '+']	['chr1', 9611785, '+']
ENST00000483015	968	1012	0.2762	['chr1', 9611879, '+']	['chr1', 9613010, '+']
ENST00000511910	63	138	0.30245	['chr1', 9613016, '+']	['chr1', 9613101, '+']
ENST00000511910	311	336	0.25165	['chr1', 9613131, '+']	['chr1', 9613151, '+']
ENST00000511910	436	457	0.2367	['chr1', 9613722, '+']	['chr1', 9613749, '+']
ENST00000511910	480	524	0.2762	['chr1', 9614044, '+']	['chr1', 9614072, '+']
ENST00000470373	71	103	0.38782	['chr1', 9614183, '+']	['chr1', 9614203, '+']
ENST00000470373	271	296	0.25165	['chr1', 9607747, '+']	['chr1', 9607789, '+']
ENST00000470373	396	417	0.2367	['chr1', 9610608, '+']	['chr1', 9610646, '+']
ENST00000470373	440	484	0.2762	['chr1', 9610705, '+']	['chr1', 9610733, '+']
ENST00000378536	299	327	0.23647	['chr1', 9610744, '+']	['chr1', 9610782, '+']
ENST00000378536	497	522	0.2553	['chr1', 9611759, '+']	['chr1', 9611785, '+']
ENST00000378536	1980	2003	0.24355	['chr1', 9611879, '+']	['chr1', 9613010, '+']
ENST00000378536	2100	2135	0.29333	['chr1', 9613016, '+']	['chr1', 9613101, '+']
ENST00000378536	2476	2498	0.24555	['chr1', 9613131, '+']	['chr1', 9613151, '+']
ENST00000378536	3208	3249	0.2816	['chr1', 10033390, '+']	['chr1', 10033426, '+']
ENST00000378536	3285	3315	0.2414	['chr1', 10033671, '+']	['chr1', 10033690, '+']
ENST00000378536	3360	3395	0.2744	['chr1', 10072126, '+']	['chr1', 10072150, '+']
ENST00000378536	3565	3597	0.2369	['chr1', 10135178, '+']	['chr1', 10137177, '+']
ENST00000378536	3965	3989	0.2506	['chr1', 10146995, '+']	['chr1', 10147057, '+']
ENST00000378536	4495	4525	0.25885	['chr1', 10151351, '+']	['chr1', 10151374, '+']
ENST00000378536	4794	4827	0.23977	['chr1', 10151393, '+']	['chr1', 10151419, '+']
ENST00000378536	4847	4905	0.27635	['chr1', 10151493, '+']	['chr1', 10151522, '+']
ENST00000378536	5000	5023	0.2412	['chr1', 10151539, '+']	['chr1', 10158383, '+']
ENST00000378536	5400	5420	0.236	['chr1', 10161233, '+']	['chr1', 10161277, '+']
ENST00000378536	5446	5474	0.24225	['chr1', 10178700, '+']	['chr1', 10178737, '+']
ENST00000378536	5562	5582	0.24127	['chr1', 10179444, '+']	['chr1', 10179480, '+']
ENST00000378513	684	705	0.2381	['chr1', 10180106, '+']	['chr1', 10180138, '+']
ENST00000378513	1143	1169	0.2401	['chr1', 10180220, '+']	['chr1', 10180254, '+']
ENST00000378513	1203	1223	0.2407	['chr1', 10180314, '+']	['chr1', 10180346, '+']
ENST00000378513	1234	1267	0.3257	['chr1', 10033671, '+']	['chr1', 10033690, '+']
ENST00000378513	1485	1523	0.31715	['chr1', 10072126, '+']	['chr1', 10072150, '+']
ENST00000378513	1563	1652	0.34425	['chr1', 10135178, '+']	['chr1', 10137177, '+']
ENST00000378513	1657	1698	0.3475	['chr1', 10146995, '+']	['chr1', 10147057, '+']
ENST00000378513	1769	1802	0.25392	['chr1', 10151351, '+']	['chr1', 10151374, '+']
ENST00000378513	2039	2078	0.2807	['chr1', 10151393, '+']	['chr1', 10151419, '+']
ENST00000378513	2118	2144	0.25206	['chr1', 10151493, '+']	['chr1', 10151522, '+']
ENST00000378513	2189	2250	0.3321	['chr1', 10151539, '+']	['chr1', 10158383, '+']
ENST00000378513	2276	2300	0.24491	['chr1', 10161233, '+']	['chr1', 10161277, '+']
ENST00000378513	2363	2383	0.23765	['chr1', 10178700, '+']	['chr1', 10178737, '+']
ENST00000378513	2392	2430	0.34395	['chr1', 10179444, '+']	['chr1', 10179480, '+']
ENST00000378513	2440	2475	0.33293	['chr1', 10180106, '+']	['chr1', 10180138, '+']
ENST00000378513	2501	2546	0.37905	['chr1', 10180220, '+']	['chr1', 10180254, '+']
ENST00000378513	2663	2693	0.266	['chr1', 10180314, '+']	['chr1', 10180368, '+']
ENST00000378513	2719	2748	0.25645	['chr1', 10180421, '+']	['chr1', 10180495, '+']
ENST00000378513	2782	2859	0.30245	['chr1', 10180862, '+']	['chr1', 10180908, '+']
ENST00000605895	726	747	0.2381	['chr1', 10180922, '+']	['chr1', 10180989, '+']
ENST00000605895	1185	1211	0.2401	['chr1', 10181127, '+']	['chr1', 10181147, '+']
ENST00000605895	1245	1265	0.2407	['chr1', 10158354, '+']	['chr1', 10158383, '+']
ENST00000605895	1276	1309	0.3257	['chr1', 10161233, '+']	['chr1', 10161277, '+']
ENST00000605895	1527	1565	0.31715	['chr1', 10178700, '+']	['chr1', 10178737, '+']
ENST00000605895	1605	1694	0.34425	['chr1', 10179444, '+']	['chr1', 10179480, '+']
ENST00000605895	1699	1740	0.3475	['chr1', 10179444, '+']	['chr1', 10179480, '+']
ENST00000605895	1811	1844	0.25392	['chr1', 10417396, '+']	['chr1', 10417416, '+']
ENST00000605895	2081	2120	0.2807	['chr1', 10417396, '+']	['chr1', 10417416, '+']
ENST00000605895	2160	2186	0.25206	['chr1', 10417396, '+']	['chr1', 10417416, '+']
ENST00000605895	2231	2292	0.3321	['chr1', 10433884, '+']	['chr1', 10433941, '+']
ENST00000605895	2318	2342	0.24491	['chr1', 10431274, '+']	['chr1', 10431329, '+']
ENST00000605895	2405	2425	0.23765	['chr1', 10599240, '+']	['chr1', 10599273, '+']
ENST00000605895	2434	2472	0.34395	['chr1', 10629621, '+']	['chr1', 10629640, '+']
ENST00000605895	2482	2517	0.33293	['chr1', 10629656, '+']	['chr1', 10629678, '+']
ENST00000605895	2543	2588	0.37905	['chr1', 10629777, '+']	['chr1', 10629812, '+']
ENST00000605895	2705	2735	0.266	['chr1', 10629819, '+']	['chr1', 10629872, '+']
ENST00000605895	2761	2790	0.25645	['chr1', 10629964, '+']	['chr1', 10629989, '+']
ENST00000605895	2824	2901	0.30245	['chr1', 10599240, '+']	['chr1', 10599273, '+']
ENST00000306256	655	674	0.241	['chr1', 11013785, '+']	['chr1', 11013840, '+']
ENST00000378512	779	800	0.2381	['chr1', 11013866, '+']	['chr1', 11013915, '+']
ENST00000378512	1238	1264	0.2401	['chr1', 11016868, '+']	['chr1', 11016938, '+']
ENST00000378512	1298	1318	0.2407	['chr1', 11020430, '+']	['chr1', 11020466, '+']
ENST00000378512	1329	1362	0.3257	['chr1', 11013785, '+']	['chr1', 11013840, '+']
ENST00000488353	2379	2400	0.2381	['chr1', 11013866, '+']	['chr1', 11013915, '+']
ENST00000462129	484	505	0.2381	['chr1', 11016868, '+']	['chr1', 11016938, '+']
ENST00000493183	168	191	0.257	['chr1', 11020430, '+']	['chr1', 11020492, '+']
ENST00000493183	279	309	0.31409	['chr1', 11020542, '+']	['chr1', 11020573, '+']
ENST00000493183	617	652	0.362	['chr1', 11020598, '+']	['chr1', 11022221, '+']
ENST00000493183	656	681	0.29355	['chr1', 11022323, '+']	['chr1', 11022357, '+']
ENST00000493183	788	819	0.24905	['chr1', 11022526, '+']	['chr1', 11022567, '+']
ENST00000474659	119	142	0.257	['chr1', 11022968, '+']	['chr1', 11023035, '+']
ENST00000474659	230	260	0.31409	['chr1', 11023246, '+']	['chr1', 11023270, '+']
ENST00000474659	536	571	0.362	['chr1', 11013785, '+']	['chr1', 11013840, '+']
ENST00000474659	575	600	0.29355	['chr1', 11013866, '+']	['chr1', 11013915, '+']
ENST00000474659	707	764	0.32718	['chr1', 11016868, '+']	['chr1', 11016938, '+']
ENST00000378425	266	289	0.257	['chr1', 11020430, '+']	['chr1', 11020492, '+']
ENST00000378425	377	407	0.31409	['chr1', 11020542, '+']	['chr1', 11020573, '+']
ENST00000378425	607	642	0.362	['chr1', 11020598, '+']	['chr1', 11022221, '+']
ENST00000378425	646	671	0.29355	['chr1', 11023246, '+']	['chr1', 11023270, '+']
ENST00000378425	778	831	0.3217	['chr1', 11013785, '+']	['chr1', 11013840, '+']
ENST00000378425	861	893	0.38155	['chr1', 11013866, '+']	['chr1', 11013915, '+']
ENST00000378425	961	1001	0.31695	['chr1', 11016868, '+']	['chr1', 11016938, '+']
ENST00000378425	1267	1353	0.27595	['chr1', 11020430, '+']	['chr1', 11020492, '+']
ENST00000378425	1412	1437	0.238	['chr1', 11020542, '+']	['chr1', 11020573, '+']
ENST00000378425	1635	1664	0.2691	['chr1', 11020598, '+']	['chr1', 11022221, '+']
ENST00000378425	1674	1718	0.31095	['chr1', 11013785, '+']	['chr1', 11013840, '+']
ENST00000378425	1723	1751	0.2491	['chr1', 11013866, '+']	['chr1', 11013915, '+']
ENST00000378425	1763	1788	0.2419	['chr1', 11020430, '+']	['chr1', 11020492, '+']
ENST00000378425	1852	1881	0.263	['chr1', 11020542, '+']	['chr1', 11020573, '+']
ENST00000378425	1883	1904	0.2595	['chr1', 11020598, '+']	['chr1', 11022221, '+']
ENST00000378425	2064	2089	0.24085	['chr1', 11022323, '+']	['chr1', 11022357, '+']
ENST00000378425	2144	2175	0.26415	['chr1', 11022526, '+']	['chr1', 11022567, '+']
ENST00000378425	2229	2251	0.248	['chr1', 11013785, '+']	['chr1', 11013840, '+']
ENST00000378425	2265	2304	0.27855	['chr1', 11013866, '+']	['chr1', 11013915, '+']
ENST00000378425	2397	2432	0.28345	['chr1', 11016868, '+']	['chr1', 11016938, '+']
ENST00000378425	2487	2506	0.2331	['chr1', 11013785, '+']	['chr1', 11013840, '+']
ENST00000378425	2514	2533	0.23105	['chr1', 11013866, '+']	['chr1', 11013915, '+']
ENST00000444521	266	289	0.257	['chr1', 11016868, '+']	['chr1', 11016938, '+']
ENST00000444521	377	407	0.31409	['chr1', 11020430, '+']	['chr1', 11020492, '+']
ENST00000444521	769	804	0.362	['chr1', 11013785, '+']	['chr1', 11013840, '+']
ENST00000444521	808	833	0.29355	['chr1', 11013866, '+']	['chr1', 11013915, '+']
ENST00000444521	940	993	0.3217	['chr1', 11016868, '+']	['chr1', 11016938, '+']
ENST00000444521	1023	1055	0.38155	['chr1', 11020430, '+']	['chr1', 11020492, '+']
ENST00000444521	1123	1163	0.31695	['chr1', 11020542, '+']	['chr1', 11020573, '+']
ENST00000444521	1429	1515	0.27595	['chr1', 11020598, '+']	['chr1', 11022155, '+']
ENST00000444521	1574	1599	0.238	['chr1', 11013785, '+']	['chr1', 11013840, '+']
ENST00000444521	1797	1826	0.2691	['chr1', 11013866, '+']	['chr1', 11013915, '+']
ENST00000444521	1836	1880	0.31095	['chr1', 11016868, '+']	['chr1', 11016938, '+']
ENST00000444521	1885	1913	0.2491	['chr1', 11018872, '+']	['chr1', 11022221, '+']
ENST00000444521	1925	1950	0.2419	['chr1', 11013785, '+']	['chr1', 11013840, '+']
ENST00000444521	2014	2043	0.263	['chr1', 11013866, '+']	['chr1', 11013915, '+']
ENST00000444521	2045	2066	0.2595	['chr1', 11016868, '+']	['chr1', 11016938, '+']
ENST00000444521	2226	2251	0.24085	['chr1', 11020430, '+']	['chr1', 11020492, '+']
ENST00000444521	2306	2337	0.26415	['chr1', 11020542, '+']	['chr1', 11020573, '+']
ENST00000444521	2391	2413	0.248	['chr1', 11020598, '+']	['chr1', 11022221, '+']
ENST00000444521	2427	2466	0.27855	['chr1', 11023246, '+']	['chr1', 11023270, '+']
ENST00000444521	2559	2594	0.28345	['chr1', 11023901, '+']	['chr1', 11023925, '+']
ENST00000444521	2649	2668	0.2331	['chr1', 11013785, '+']	['chr1', 11013840, '+']
ENST00000444521	2676	2695	0.23105	['chr1', 11013866, '+']	['chr1', 11013915, '+']
ENST00000419916	241	264	0.257	['chr1', 11020542, '+']	['chr1', 11020573, '+']
ENST00000419916	352	382	0.31409	['chr1', 11020598, '+']	['chr1', 11022221, '+']
ENST00000419916	690	725	0.362	['chr1', 11022526, '+']	['chr1', 11022567, '+']
ENST00000419916	729	754	0.29355	['chr1', 11013785, '+']	['chr1', 11013840, '+']
ENST00000419916	861	914	0.3217	['chr1', 11013866, '+']	['chr1', 11013915, '+']
ENST00000419916	944	976	0.38155	['chr1', 11016868, '+']	['chr1', 11016938, '+']
ENST00000419916	1044	1084	0.31695	['chr1', 11020430, '+']	['chr1', 11020492, '+']
ENST00000419916	1350	1436	0.27595	['chr1', 11020542, '+']	['chr1', 11020573, '+']
ENST00000419916	1495	1520	0.238	['chr1', 11020598, '+']	['chr1', 11022221, '+']
ENST00000419916	1718	1747	0.2691	['chr1', 11022242, '+']	['chr1', 11023276, '+']
ENST00000419916	1757	1801	0.31095	['chr1', 11013785, '+']	['chr1', 11013840, '+']
ENST00000419916	1806	1834	0.2491	['chr1', 11013866, '+']	['chr1', 11013915, '+']
ENST00000419916	1846	1871	0.2419	['chr1', 11016868, '+']	['chr1', 11016938, '+']
ENST00000419916	1935	1964	0.263	['chr1', 11020430, '+']	['chr1', 11020492, '+']
ENST00000419916	1966	1987	0.2595	['chr1', 11020542, '+']	['chr1', 11020573, '+']
ENST00000419916	2147	2172	0.24085	['chr1', 11020598, '+']	['chr1', 11022221, '+']
ENST00000419916	2227	2258	0.26415	['chr1', 11023246, '+']	['chr1', 11023270, '+']
ENST00000419916	2312	2334	0.248	['chr1', 11016868, '+']	['chr1', 11016938, '+']
ENST00000419916	2348	2387	0.27855	['chr1', 11020430, '+']	['chr1', 11020492, '+']
ENST00000419916	2480	2515	0.28345	['chr1', 11020542, '+']	['chr1', 11020573, '+']
ENST00000419916	2570	2589	0.2331	['chr1', 11020598, '+']	['chr1', 11022221, '+']
ENST00000419916	2597	2616	0.23105	['chr1', 11023243, '+']	['chr1', 11023266, '+']
ENST00000378424	236	259	0.257	['chr1', 11016868, '+']	['chr1', 11016938, '+']
ENST00000378424	347	377	0.31409	['chr1', 11020430, '+']	['chr1', 11020492, '+']
ENST00000378424	707	742	0.362	['chr1', 11020542, '+']	['chr1', 11020573, '+']
ENST00000378424	746	771	0.29355	['chr1', 11020598, '+']	['chr1', 11022221, '+']
ENST00000378424	878	931	0.3217	['chr1', 11023246, '+']	['chr1', 11023270, '+']
ENST00000378424	961	993	0.38155	['chr1', 11020430, '+']	['chr1', 11020492, '+']
ENST00000378424	1061	1101	0.31695	['chr1', 11020542, '+']	['chr1', 11020573, '+']
ENST00000378424	1367	1453	0.27595	['chr1', 11020598, '+']	['chr1', 11022221, '+']
ENST00000378424	1512	1537	0.238	['chr1', 11023246, '+']	['chr1', 11023270, '+']
ENST00000378424	1735	1764	0.2691	['chr1', 11020430, '+']	['chr1', 11020492, '+']
ENST00000378424	1774	1818	0.31095	['chr1', 11020542, '+']	['chr1', 11020573, '+']
ENST00000378424	1823	1851	0.2491	['chr1', 11020598, '+']	['chr1', 11022221, '+']
ENST00000378424	1863	1888	0.2419	['chr1', 11023246, '+']	['chr1', 11023270, '+']
ENST00000378424	1952	1981	0.263	['chr1', 11023901, '+']	['chr1', 11023925, '+']
ENST00000378424	1983	2004	0.2595	['chr1', 11020430, '+']	['chr1', 11020492, '+']
ENST00000378424	2164	2189	0.24085	['chr1', 11020542, '+']	['chr1', 11020573, '+']
ENST00000378424	2244	2275	0.26415	['chr1', 11020598, '+']	['chr1', 11022221, '+']
ENST00000378424	2329	2351	0.248	['chr1', 11023246, '+']	['chr1', 11023270, '+']
ENST00000378424	2365	2404	0.27855	['chr1', 11020433, '+']	['chr1', 11020492, '+']
ENST00000378424	2497	2532	0.28345	['chr1', 11020542, '+']	['chr1', 11020573, '+']
ENST00000378424	2587	2606	0.2331	['chr1', 11020598, '+']	['chr1', 11023164, '+']
ENST00000378424	2614	2633	0.23105	['chr1', 11023246, '+']	['chr1', 11023270, '+']
ENST00000537325	220	243	0.257	['chr1', 11020598, '+']	['chr1', 11022221, '+']
ENST00000537325	331	361	0.31409	['chr1', 11023246, '+']	['chr1', 11023270, '+']
ENST00000537325	558	593	0.362	['chr1', 11025145, '+']	['chr1', 11025178, '+']
ENST00000537325	597	622	0.29355	['chr1', 11022323, '+']	['chr1', 11022357, '+']
ENST00000537325	729	782	0.3217	['chr1', 11022526, '+']	['chr1', 11022567, '+']
ENST00000537325	812	844	0.38155	['chr1', 11023246, '+']	['chr1', 11023270, '+']
ENST00000537325	912	952	0.31695	['chr1', 11025145, '+']	['chr1', 11025178, '+']
ENST00000378427	218	241	0.257	['chr1', 11023246, '+']	['chr1', 11023270, '+']
ENST00000378427	329	359	0.31409	['chr1', 11025145, '+']	['chr1', 11025178, '+']
ENST00000378427	635	670	0.362	['chr1', 11655975, '+']	['chr1', 11656007, '+']
ENST00000378427	674	699	0.29355	['chr1', 11658871, '+']	['chr1', 11661161, '+']
ENST00000378427	806	859	0.3217	['chr1', 11661392, '+']	['chr1', 11661443, '+']
ENST00000378427	889	921	0.38155	['chr1', 11661529, '+']	['chr1', 11661549, '+']
ENST00000378427	989	1029	0.31695	['chr1', 11661566, '+']	['chr1', 11661599, '+']
ENST00000378427	1295	1381	0.27595	['chr1', 11661616, '+']	['chr1', 11661653, '+']
ENST00000378427	1440	1465	0.238	['chr1', 11661812, '+']	['chr1', 11661839, '+']
ENST00000378427	1663	1692	0.2691	['chr1', 11661877, '+']	['chr1', 11661913, '+']
ENST00000378427	1702	1746	0.31095	['chr1', 11661928, '+']	['chr1', 11661950, '+']
ENST00000378427	1751	1779	0.2491	['chr1', 11655975, '+']	['chr1', 11656007, '+']
ENST00000378427	1791	1816	0.2419	['chr1', 11658871, '+']	['chr1', 11661161, '+']
ENST00000378427	1880	1909	0.263	['chr1', 11655975, '+']	['chr1', 11656007, '+']
ENST00000378427	1911	1932	0.2595	['chr1', 11658871, '+']	['chr1', 11661161, '+']
ENST00000378427	2092	2117	0.24085	['chr1', 11661392, '+']	['chr1', 11661443, '+']
ENST00000378427	2172	2203	0.26415	['chr1', 11661529, '+']	['chr1', 11661549, '+']
ENST00000378427	2257	2279	0.248	['chr1', 11661566, '+']	['chr1', 11661599, '+']
ENST00000378427	2293	2332	0.27855	['chr1', 11661616, '+']	['chr1', 11661653, '+']
ENST00000378427	2425	2460	0.28345	['chr1', 11661812, '+']	['chr1', 11661839, '+']
ENST00000378427	2515	2534	0.2331	['chr1', 11661877, '+']	['chr1', 11661913, '+']
ENST00000378427	2542	2561	0.23105	['chr1', 11661928, '+']	['chr1', 11661950, '+']
ENST00000464043	101	124	0.257	['chr1', 11655975, '+']	['chr1', 11656007, '+']
ENST00000464043	212	242	0.31409	['chr1', 11658871, '+']	['chr1', 11661161, '+']
ENST00000464043	550	585	0.362	['chr1', 11655975, '+']	['chr1', 11656007, '+']
ENST00000464043	589	614	0.29355	['chr1', 11658871, '+']	['chr1', 11661161, '+']
ENST00000464043	721	774	0.3217	['chr1', 11661392, '+']	['chr1', 11661443, '+']
ENST00000464043	804	836	0.38155	['chr1', 11661529, '+']	['chr1', 11661549, '+']
ENST00000464043	905	924	0.23575	['chr1', 11661566, '+']	['chr1', 11661599, '+']
ENST00000498083	139	162	0.257	['chr1', 11661616, '+']	['chr1', 11661653, '+']
ENST00000498083	250	280	0.31409	['chr1', 11661812, '+']	['chr1', 11661839, '+']
ENST00000484099	80	103	0.257	['chr1', 11661877, '+']	['chr1', 11661913, '+']
ENST00000484099	191	221	0.31409	['chr1', 11661928, '+']	['chr1', 11661950, '+']
ENST00000484099	517	552	0.362	['chr1', 11658871, '+']	['chr1', 11661161, '+']
ENST00000484099	556	581	0.29355	['chr1', 11658871, '+']	['chr1', 11661161, '+']
ENST00000484099	688	741	0.3217	['chr1', 11949801, '+']	['chr1', 11949833, '+']
ENST00000484099	771	803	0.38155	['chr1', 11949843, '+']	['chr1', 11949891, '+']
ENST00000484099	871	911	0.31695	['chr1', 11952631, '+']	['chr1', 11952665, '+']
ENST00000484099	1177	1263	0.27595	['chr1', 11957006, '+']	['chr1', 11957885, '+']
ENST00000484099	1322	1347	0.238	['chr1', 11934721, '+']	['chr1', 11934742, '+']
ENST00000484099	1545	1574	0.2691	['chr1', 11949801, '+']	['chr1', 11949833, '+']
ENST00000484099	1584	1628	0.31095	['chr1', 11949843, '+']	['chr1', 11949891, '+']
ENST00000484099	1633	1661	0.2491	['chr1', 11952631, '+']	['chr1', 11952670, '+']
ENST00000484099	1673	1698	0.2419	['chr1', 11949801, '+']	['chr1', 11949833, '+']
ENST00000484099	1762	1791	0.263	['chr1', 11949843, '+']	['chr1', 11949891, '+']
ENST00000484099	1793	1814	0.2595	['chr1', 11952631, '+']	['chr1', 11952665, '+']
ENST00000484099	1974	1999	0.24085	['chr1', 11949801, '+']	['chr1', 11949833, '+']
ENST00000484099	2054	2085	0.26415	['chr1', 11949843, '+']	['chr1', 11949891, '+']
ENST00000484099	2139	2161	0.248	['chr1', 11952631, '+']	['chr1', 11952665, '+']
ENST00000484099	2175	2214	0.27855	['chr1', 11957185, '+']	['chr1', 11957885, '+']
ENST00000484099	2307	2342	0.28345	['chr1', 11949801, '+']	['chr1', 11949833, '+']
ENST00000484099	2397	2416	0.2331	['chr1', 11949843, '+']	['chr1', 11949891, '+']
ENST00000484099	2424	2443	0.23105	['chr1', 11952631, '+']	['chr1', 11952665, '+']
ENST00000476686	447	482	0.362	['chr1', 11957006, '+']	['chr1', 11957885, '+']
ENST00000476686	486	511	0.29355	['chr1', 11974792, '+']	['chr1', 11974822, '+']
ENST00000476686	618	671	0.3217	['chr1', 11957006, '+']	['chr1', 11957885, '+']
ENST00000476686	701	733	0.38155	['chr1', 11974792, '+']	['chr1', 11974822, '+']
ENST00000476686	801	841	0.31695	['chr1', 11989200, '+']	['chr1', 11989231, '+']
ENST00000476686	1107	1193	0.27595	['chr1', 11992577, '+']	['chr1', 11992610, '+']
ENST00000476686	1252	1277	0.238	['chr1', 11996173, '+']	['chr1', 11996211, '+']
ENST00000476686	1475	1504	0.2691	['chr1', 11996260, '+']	['chr1', 11996287, '+']
ENST00000476686	1514	1558	0.31095	['chr1', 11998824, '+']	['chr1', 11999011, '+']
ENST00000476686	1563	1591	0.2491	['chr1', 11999031, '+']	['chr1', 11999069, '+']
ENST00000476686	1603	1628	0.2419	['chr1', 11999074, '+']	['chr1', 12001404, '+']
ENST00000476686	1692	1721	0.263	['chr1', 12001455, '+']	['chr1', 12001481, '+']
ENST00000476686	1723	1744	0.2595	['chr1', 12001830, '+']	['chr1', 12002055, '+']
ENST00000476686	1904	1929	0.24085	['chr1', 12004513, '+']	['chr1', 12004542, '+']
ENST00000476686	1984	2015	0.26415	['chr1', 12004837, '+']	['chr1', 12004872, '+']
ENST00000476686	2069	2091	0.248	['chr1', 12005735, '+']	['chr1', 12005764, '+']
ENST00000476686	2105	2144	0.27855	['chr1', 12006541, '+']	['chr1', 12006637, '+']
ENST00000476686	2237	2272	0.28345	['chr1', 12007158, '+']	['chr1', 12007189, '+']
ENST00000476686	2327	2346	0.2331	['chr1', 12007195, '+']	['chr1', 12007227, '+']
[truncated: 202,309+ more rows]

## Sheet: A375_vs_HAP1
transcript_id	start_coordinate	stop_coordinate	L1_distance	genomeCoor_start	genomeCoor_end
[truncated: 108,701 more rows]

[truncated: 2 more sheets: A375_vs_K562, HAP1_K562]
