# Supplementary material for: Deciphering cellular context for efficient and cell type-specific CRISPR-Cas13d gRNA design using in vivo RNA structure and deep learning
Source: Research Square preprint supplement (doi:10.21203/rs.3.rs-7184055/v1), 2025-09-24
Supplement: Supplementary file 7 [file df58a129621e05b3bf518969.xlsx]

## Sheet: cloning oligos and primers
oligos and primers for Gibson cloning
Name	sequences	notes
oligo library left overhang	aacccctaccaactggtcggggtttgaaac	added to the 5′ end of guide spacer for oligo synthesis
oligo library right overhang	ttttttgaattcgctagctaggtcttgaaagg	added to the 3′ end of guide spacer for oligo synthesis
Library amplification from single stranded synthesized oligo pool (HPLC-purified)
Name	sequences
Lib_F	tatatatcttgtggaaaggacgaaacaccgaacccctaccaactggtcggggtttgaaac
Lib_R	ctgacgggcaccggagccaattcccactcctttcaagacctagctagcgaattcaaaaaa
cas13d general primer	ATTTAGGTGACACTATAgacccctaccaactggtcggggtttgaaac

## Sheet: NGS primers
Lentivirus crRNA amplification from genomic DNA or LentiGuide plasmid
Name	sequence	barcode
PCR1_fwd	GAGGGCCTATTTCCCATGATTC	-
PCR1_rev	GTTGCGAAAAAGAACGTTCACGG	-
PCR2_F01	AATGATACGGCGACCACCGAGATCTACACTCTTTCCCTACACGACGCTCTTCCGATCTtAAGTAGAGtcttgtggaaaggacgaaacaccg	AAGTAGAG
PCR2_F02	AATGATACGGCGACCACCGAGATCTACACTCTTTCCCTACACGACGCTCTTCCGATCTatACACGATCtcttgtggaaaggacgaaacaccg	ACACGATC
PCR2_F03	AATGATACGGCGACCACCGAGATCTACACTCTTTCCCTACACGACGCTCTTCCGATCTgatCGCGCGGTtcttgtggaaaggacgaaacaccg	CGCGCGGT
PCR2_F04	AATGATACGGCGACCACCGAGATCTACACTCTTTCCCTACACGACGCTCTTCCGATCTcgatCATGATCGtcttgtggaaaggacgaaacaccg	CATGATCG
PCR2_F05	AATGATACGGCGACCACCGAGATCTACACTCTTTCCCTACACGACGCTCTTCCGATCTtcgatCGTTACCAtcttgtggaaaggacgaaacaccg	CGTTACCA
PCR2_F06	AATGATACGGCGACCACCGAGATCTACACTCTTTCCCTACACGACGCTCTTCCGATCTatcgatTCCTTGGTtcttgtggaaaggacgaaacaccg	TCCTTGGT
PCR2_F07	AATGATACGGCGACCACCGAGATCTACACTCTTTCCCTACACGACGCTCTTCCGATCTgatcgatAACGCATTtcttgtggaaaggacgaaacaccg	AACGCATT
PCR2_F08	AATGATACGGCGACCACCGAGATCTACACTCTTTCCCTACACGACGCTCTTCCGATCTcgatcgatACAGGTATtcttgtggaaaggacgaaacaccg	ACAGGTAT
PCR2_F09	AATGATACGGCGACCACCGAGATCTACACTCTTTCCCTACACGACGCTCTTCCGATCTacgatcgatAGGTAAGGtcttgtggaaaggacgaaacaccg	AGGTAAGG
PCR2_F10	AATGATACGGCGACCACCGAGATCTACACTCTTTCCCTACACGACGCTCTTCCGATCTtAACAATGGtcttgtggaaaggacgaaacaccg	AACAATGG
PCR2_F11	AATGATACGGCGACCACCGAGATCTACACTCTTTCCCTACACGACGCTCTTCCGATCTatACTGTATCtcttgtggaaaggacgaaacaccg	ACTGTATC
PCR2_F12	AATGATACGGCGACCACCGAGATCTACACTCTTTCCCTACACGACGCTCTTCCGATCTgatAGGTCGCAtcttgtggaaaggacgaaacaccg	AGGTCGCA
PCR2_R01	CAAGCAGAAGACGGCATACGAGATAAGTAGAGGTGACTGGAGTTCAGACGTGTGCTCTTCCGATCTtgagccaattcccactcctttcaag	CTCTACTT
PCR2_R02	CAAGCAGAAGACGGCATACGAGATACACGATCGTGACTGGAGTTCAGACGTGTGCTCTTCCGATCTatgagccaattcccactcctttcaag	GATCGTGT
PCR2_R03	CAAGCAGAAGACGGCATACGAGATCGCGCGGTGTGACTGGAGTTCAGACGTGTGCTCTTCCGATCTgatgagccaattcccactcctttcaag	ACCGCGCG
PCR2_R04	CAAGCAGAAGACGGCATACGAGATCATGATCGGTGACTGGAGTTCAGACGTGTGCTCTTCCGATCTcgatgagccaattcccactcctttcaag	CGATCATG
PCR2_R05	CAAGCAGAAGACGGCATACGAGATCGTTACCAGTGACTGGAGTTCAGACGTGTGCTCTTCCGATCTtcgatgagccaattcccactcctttcaag	TGGTAACG
PCR2_R06	CAAGCAGAAGACGGCATACGAGATTCCTTGGTGTGACTGGAGTTCAGACGTGTGCTCTTCCGATCTatcgatgagccaattcccactcctttcaag	ACCAAGGA
PCR2_R07	CAAGCAGAAGACGGCATACGAGATAACGCATTGTGACTGGAGTTCAGACGTGTGCTCTTCCGATCTgatcgatgagccaattcccactcctttcaag	AATGCGTT
PCR2_R08	CAAGCAGAAGACGGCATACGAGATACAGGTATGTGACTGGAGTTCAGACGTGTGCTCTTCCGATCTcgatcgatgagccaattcccactcctttcaag	ATACCTGT
PCR2_R09	CAAGCAGAAGACGGCATACGAGATAGGTAAGGGTGACTGGAGTTCAGACGTGTGCTCTTCCGATCTacgatcgatgagccaattcccactcctttcaag	CCTTACCT
PCR2_R10	CAAGCAGAAGACGGCATACGAGATAACAATGGGTGACTGGAGTTCAGACGTGTGCTCTTCCGATCTtgagccaattcccactcctttcaag	CCATTGTT
PCR2_R11	CAAGCAGAAGACGGCATACGAGATACTGTATCGTGACTGGAGTTCAGACGTGTGCTCTTCCGATCTatgagccaattcccactcctttcaag	GATACAGT
PCR2_R12	CAAGCAGAAGACGGCATACGAGATAGGTCGCAGTGACTGGAGTTCAGACGTGTGCTCTTCCGATCTgatgagccaattcccactcctttcaag	TGCGACCT
PCR2_R13	CAAGCAGAAGACGGCATACGAGATCGAGCAGTGTGACTGGAGTTCAGACGTGTGCTCTTCCGATCTgagccaattcccactcctttcaag	ACTGCTCG
PCR2_R14	CAAGCAGAAGACGGCATACGAGATTAGAGGAGGTGACTGGAGTTCAGACGTGTGCTCTTCCGATCTtgagccaattcccactcctttcaag	CTCCTCTA
PCR2_R15	CAAGCAGAAGACGGCATACGAGATACCCTTTCGTGACTGGAGTTCAGACGTGTGCTCTTCCGATCTatgagccaattcccactcctttcaag	GAAAGGGT
PCR2_R16	CAAGCAGAAGACGGCATACGAGATGTTTACCAGTGACTGGAGTTCAGACGTGTGCTCTTCCGATCTgatgagccaattcccactcctttcaag	TGGTAAAC
PCR2_R17	CAAGCAGAAGACGGCATACGAGATTACCTTGTGTGACTGGAGTTCAGACGTGTGCTCTTCCGATCTcgatgagccaattcccactcctttcaag	ACAAGGTA
PCR2_R18	CAAGCAGAAGACGGCATACGAGATACGGGACGGTGACTGGAGTTCAGACGTGTGCTCTTCCGATCTtcgatgagccaattcccactcctttcaag	CGTCCCGT
PCR2_R19	CAAGCAGAAGACGGCATACGAGATGGTACCACGTGACTGGAGTTCAGACGTGTGCTCTTCCGATCTatcgatgagccaattcccactcctttcaag	GTGGTACC
PCR2_R20	CAAGCAGAAGACGGCATACGAGATCTATAGTAGTGACTGGAGTTCAGACGTGTGCTCTTCCGATCTgatcgatgagccaattcccactcctttcaag	TACTATAG
PCR2_R21	CAAGCAGAAGACGGCATACGAGATCAATACCTGTGACTGGAGTTCAGACGTGTGCTCTTCCGATCTcgatcgatgagccaattcccactcctttcaag	AGGTATTG
PCR2_R22	CAAGCAGAAGACGGCATACGAGATACTAGGAGGTGACTGGAGTTCAGACGTGTGCTCTTCCGATCTacgatcgatgagccaattcccactcctttcaag	CTCCTAGT
PCR2_R23	CAAGCAGAAGACGGCATACGAGATTTGGCATCGTGACTGGAGTTCAGACGTGTGCTCTTCCGATCTgagccaattcccactcctttcaag	GATGCCAA
PCR2_R24	CAAGCAGAAGACGGCATACGAGATGGCCTTGAGTGACTGGAGTTCAGACGTGTGCTCTTCCGATCTtgagccaattcccactcctttcaag	TCAAGGCC

## Sheet: qPCR primers
qPCR primers for targeting dynamic structural regions
Name	sequences
TUBNEB_F	TCTTAGCTTGTCGGGGACGG
TUBNEB_R	GATGGAGATGCACTCACGCATAG
CHD3_F	TTGGGTCTCCCATACTGCGT
CHD4_R	CCTCCTCACTGTCACGCTTC
ACTB_qF	ATGTGGCCGAGGACTTTGATTG
ACTB_qR	CTGGGCCATTCTCCTTAGAGAG
qPCR primers for zebrafish
Name	sequences
dnd1-R	GTTCGGGATCTGACTGATGA
dnd1-F	AGGAGCTTCAGCAGATTCTG
nanog_R	CAGGATGGCAGATTGAGG
nanog_F	AGCAGACCAGCAGTGATA
gapdh_F	TTGCCGTTCATCCATCTTTG
gapdh_R	TGCTGTAACCGAACTCATTGTC
in situ hybridization probe targeting nanos3
nanos3-F	GCCTTGGAAGGACTACATGG
nanos3-R	CGCACACATGCATGCAAACTCGC

## Sheet: gRNAs
gRNAs targeting 5'-UTR
virus type	gRNA_ids	sequence	high or low efficacy
HCoV-NL63	hNL63_gRNA_104	AATTTCAATTACACTAGGACTGC	high efficacy
	hNL63_gRNA_83	GCCATAACAAATGACAGCACTAG	high efficacy
	hNL63_gRNA_145	GAAAATACAACACTTGCCTAACC	high efficacy
	hNL63_gRNA_94	ACACTAGGACTGCCATAACAAAT	low efficacy
	hNL63_gRNA_31	CACAAAGTCTAAATAAGAAAATT	low efficacy
	hNL63_gRNA_62	AGAAAAATTTCGTTTAGTTGAGA	low efficacy
HCoV-HKU1	hHKU1_gRNA_158	GACAACCAACACGTCACTGGCAG	high efficacy
	hHKU1_gRNA_17	TAAGCTGATAGACGGTACGAACG	high efficacy
	hHKU1_gRNA_18	GTAAGCTGATAGACGGTACGAAC	high efficacy
	hHKU1_gRNA_62	TCTTGTTTAAAAAGTTTAGATTT	low efficacy
	hHKU1_gRNA_72	TAACAGGGAATCTTGTTTAAAAA	low efficacy
	hHKU1_gRNA_74	GATAACAGGGAATCTTGTTTAAA	low efficacy
MERS-CoV	MERS_gRNA_97	ATCCCACCAGACAAGTGCAACGA	high efficacy
	MERS_gRNA_98	AATCCCACCAGACAAGTGCAACG	high efficacy
	MERS_gRNA_229	ACGAAACCGTGTATTGTGACCGA	high efficacy
	MERS_gRNA_176	AAAATAGTATTCAATTAGAATTA	low efficacy
	MERS_gRNA_126	CCTAGATGAGCAGGCAAATTAAT	low efficacy
	MERS_gRNA_127	GCCTAGATGAGCAGGCAAATTAA	low efficacy
BtCoV-HKU9	bHKU9_gRNA_56	AAGTTCGTTCAAGAGTGATTCGT	high efficacy
	bHKU9_gRNA_142	AGTACTTAACCAAAAAGCTCCAC	high efficacy
	bHKU9_gRNA_184	AGGGCTAACAAACAGGACGACAC	high efficacy
	bHKU9_gRNA_37	TCGTACAAGACGAAACGGGGGTT	low efficacy
	bHKU9_gRNA_63	CAATTTTAAGTTCGTTCAAGAGT	low efficacy
	bHKU9_gRNA_99	CGCACAGCAAGACGAAACCTACC	low efficacy
BtCoV-HKU5	bHKU5_gRNA_74	AGCACGCAAACCAGCAGGGCTAT	high efficacy
	bHKU5_gRNA_90	AGCAGAAAGGTATCGCAGCACGC	high efficacy
	bHKU5_gRNA_92	GCAGCAGAAAGGTATCGCAGCAC	high efficacy
	bHKU5_gRNA_155	ATATTATTCAGTTTTAATTATAC	low efficacy
	bHKU5_gRNA_156	AATATTATTCAGTTTTAATTATA	low efficacy
	bHKU5_gRNA_157	AAATATTATTCAGTTTTAATTAT	low efficacy
SARS-CoV-2	SCV2-T_gRNA_156	TAGACGAGTTACTCGTGTCCTGT	high efficacy
	SCV2-T_gRNA_28	GAGATCGAAAGTTGGTTGGTTTG	high efficacy
	SCV2-T_gRNA_21	AAAGTTGGTTGGTTTGTTACCTG	high efficacy
	SCV2-T_gRNA_127	CAGTAATTAGTTATTAATTATAC	low efficacy
	SCV2-T_gRNA_3	ACCTGGGAAGGTATAAACCTTTA	low efficacy
	SCV2-T_gRNA_233	GGTCACACCCGGACAAAACCTAG	low efficacy
non-targeting gRNA
Name	sequences
NT-1	GACGGTACCATGCACTGGCGGCA
gRNAs targeting TUBA1B
Name	sequences		note
TUBA1B_gRNA1063	AGCATTGACATCTTTGGGAACCA		positive
TUBA1B_gRNA574	CAGCTTGGACTTCTTGCCATAAT		dysite
gRNAs targeting CHD3
Name	sequences		note
CHD3_HEK293T_gRNA3258		AAGGTATGGATGGTTGCAGCACT	positive
CHD3_HEK293T_gRNA4102		CAGGGTCCACATTCTCCTCCTGC	dysite
gRNAs targeting nanog and dnd1
Name	sequences	type
nanog_1cell_gRNA1473	GATAAAATACACGAAGCAGCTGG	h1
nanog_1cell_gRNA1565	GCAACCCATGACATCACTGCCTA	h2
nanog_1cell_gRNA1479	AAGATTGATAAAATACACGAAGC	h3
nanog_1cell_gRNA2747	TTTTAAGGTGACGATTTGATTAA	L1
nanog_1cell_gRNA1214	TTTTGGAGGACTCCTCTTGAAAA	L2
nanog_1cell_gRNA1215	TTTTTGGAGGACTCCTCTTGAAA	L3
dnd1_1cell_gRNA1788	AAGTAATACTGCCTTGGTCACCT	h1
dnd1_1cell_gRNA1027	GGTGATGGAAATGCCGTACCGGT	h2
dnd1_1cell_gRNA1003	CCGAAAAGCTTCCACGAGCACTT	h3
dnd1_1cell_gRNA1530	CTGGTGCCTGGCAGGATCTGGAC	L1
dnd1_1cell_gRNA1572	TCAGCGGCGGCCCGGTAAACTTC	L2
dnd1_1cell_gRNA782	CGGTCAGGCAGCCCCCCTCCGGC	L3
